# Supplementary material for: Cr/PCCP-catalysed selective ethylene oligomerization: analysis of various conformations and the hemilabile methoxy group
Source: Royal Society of Chemistry journal article supplement (doi:10.1039/d2cy01219g), 2022-01-01
Supplement: d2cy01219g1.pdf [file d2cy01219g1.pdf]

**Cr/PCCP-Catalysed Selective Ethylene Oligomerization: Analysis of Various  
Conformations and the Hemilabile Methoxy Group**

Xuqin Zhong,<sup>a</sup> Lin Liu,<sup>a</sup> Xing Guo,<sup>a</sup> Li Sun,<sup>a</sup> Boping Liu<sup>b</sup> and Zhen Liu<sup>\*a</sup>

<sup>a</sup>School of Chemical Engineering, East China University of Science and Technology, Shanghai 200237, China

<sup>b</sup>College of Materials and Energy, South China Agricultural University, Guangzhou 510642, China

\*Corresponding author:

Zhen Liu, Email: [liuzhen@ecust.edu.cn](mailto:liuzhen@ecust.edu.cn)

## 1. Various conformers of catalyst models

CREST was utilized to generate an ensemble of conformers for both catalyst model A and catalyst model B. The initial conformers were fully optimized at the B3LYP/def2-SVP level. The Gibbs free energies of the conformers are summarized in Table S1 and Table S2.

Table S1. Relative Gibbs free energies for various conformers of catalyst model A.

| conformer | G (Hartree)  | $\Delta G$ (kcal/mol) |
|-----------|--------------|-----------------------|
| 1         | -2730.973951 | 0.0                   |
| 2         | -2730.973572 | 0.2                   |
| 3         | -2730.973285 | 0.4                   |
| 4         | -2730.972866 | 0.7                   |

Table S2. Relative Gibbs free energies for various conformers of catalyst model B.

| conformer | G (Hartree)  | $\Delta G$ (kcal/mol) |
|-----------|--------------|-----------------------|
| 1         | -2959.816473 | 0.0                   |
| 2         | -2959.812889 | 2.2                   |
| 3         | -2959.812239 | 2.7                   |
| 4         | -2959.812186 | 2.7                   |
| 5         | -2959.812085 | 2.8                   |
| 6         | -2959.811313 | 3.2                   |
| 7         | -2959.810639 | 3.7                   |
| 8         | -2959.809774 | 4.2                   |
| 9         | -2959.809612 | 4.3                   |
| 10        | -2959.809317 | 4.5                   |
| 11        | -2959.809058 | 4.7                   |
| 12        | -2959.809048 | 4.7                   |
| 13        | -2959.808757 | 4.8                   |
| 14        | -2959.808466 | 5.0                   |
| 15        | -2959.808023 | 5.3                   |
| 16        | -2959.807778 | 5.5                   |
| 17        | -2959.807462 | 5.7                   |

## 2. Spin crossover between two adjacent surfaces

Bis(ethylene) coordinated Cr intermediate 2 is lowest in energy with a sextet spin state. For both catalyst model A and model B, the doublet and quartet spin states are 10 kcal/mol above the sextet state. The transition state of oxidative coupling step is lowest in energy on the quartet surfaces. For both catalyst model A and catalyst model B, the doublet and sextet spin states are 20 kcal/mol above the quartet state. The reaction is greatly promoted by spin surface crossing between the sextet surface and the quartet surface, which effectively reduces the reaction energy barrier.

a) Calculated free energy diagram of catalyst model A      b) Calculated free energy diagram of catalyst model B

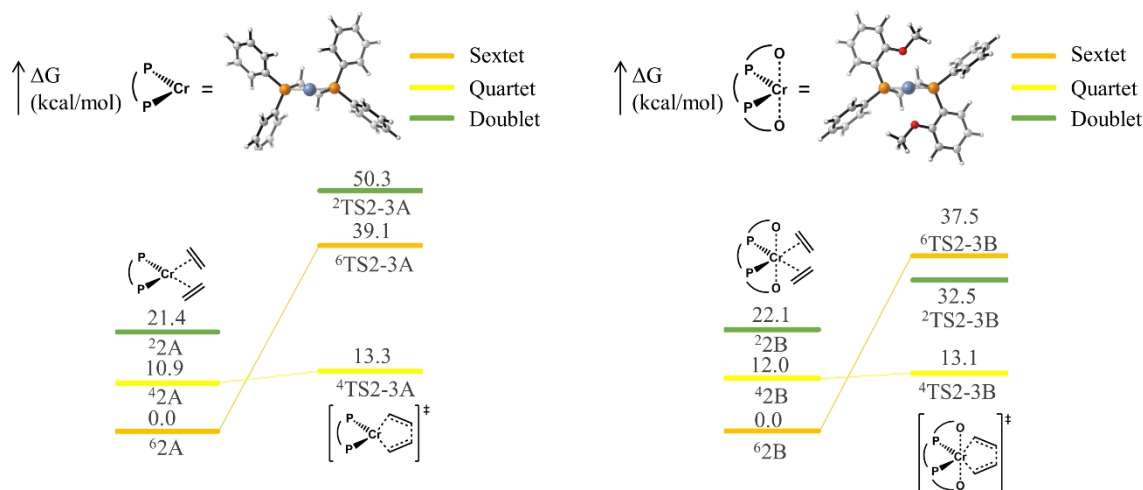

Fig. S1. Calculated free energy diagram. The relative Gibbs free energies calculated at M06L-D3/def2-TZVP//B3LYP-D3/def2-SVP level are given in kcal/mol. The doublet, quartet, and sextet surfaces are depicted in green, yellow and orange, respectively. The superscript numbers (2,4,6) refer to the spin multiplicity.

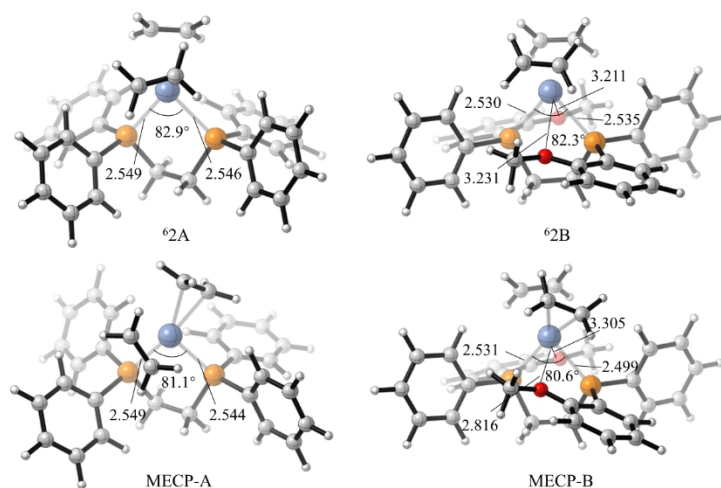

Fig. S2. Geometries of MECPs (Bottom) and bis(ethylene)Cr complex (Top) of catalyst model A (Left) and catalyst model B (Right).

### 3. Formation of 1-butene by ethylene dimerization

Starting from the intermediate chromacyclopentane <sup>4</sup>3, there are two paths. One is the two-step hydrogen transfer to form 1-butene, and the second is the formation of the chromacycloheptane by migratory insertion of the third ethylene molecule. The formation of 1-butene requires to overcome a high energy barrier (<sup>4</sup>3→<sup>4</sup>TS7-8) of 19.4 kcal/mol for catalyst model A, and 27.3 kcal/mol for catalyst model B. So, the intermediate chromacyclopentane favors expansion to form chromacycloheptane rather than elimination to yield 1-butene.

a) Ethylene dimerization and trimerization of catalyst model A

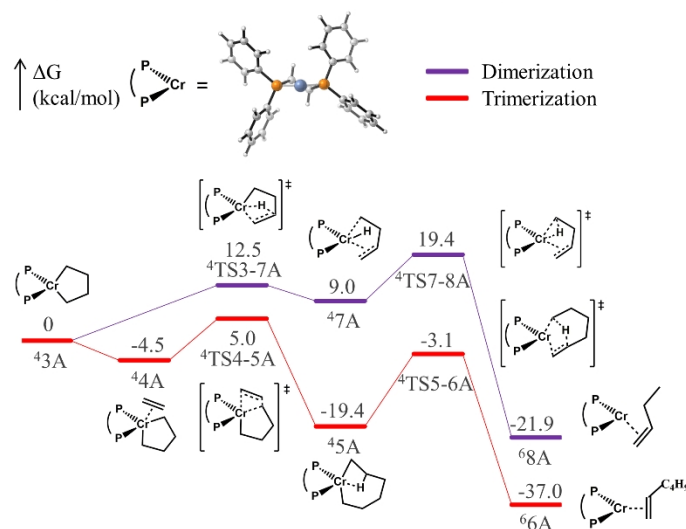

b) Ethylene dimerization and trimerization of catalyst model B

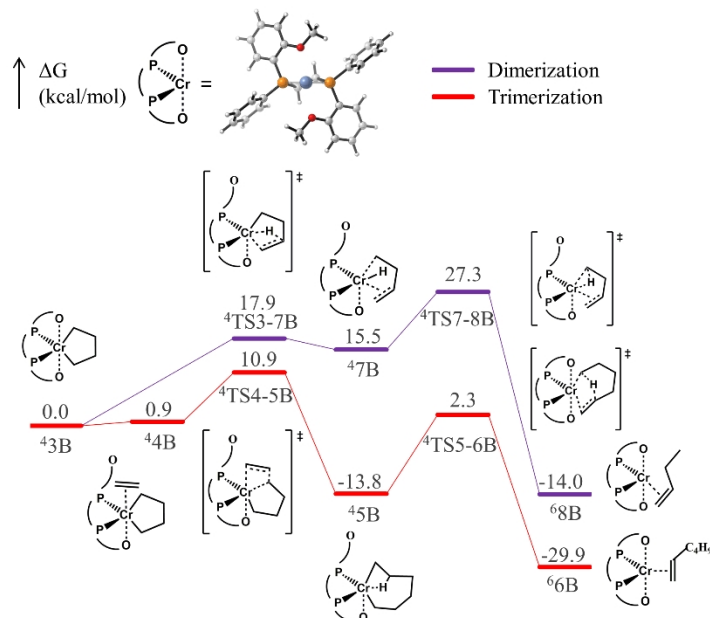

Fig. S3. Calculated free energy diagram for ethylene dimerization and trimerization of catalyst model A and catalyst model B. The relative Gibbs free energies calculated at M06L-D3/def2-TZVP//B3LYP-D3/def2-SVP level are given in kcal/mol. The superscript number (4,6) refer to the spin multiplicity.

#### 4. Various conformers of transition state TS5-6

TS5-6 is one of the key transition states for the selective tri-/tetramerization of ethylene according to the metallacycle mechanism. CREST was utilized to generate an ensemble of conformers for the transition state TS5-6A and TS5-6B, respectively. The initial conformers were fully optimized at the B3LYP/def2-SVP level. The Gibbs free energies of the conformers are summarized in Table S3 and Table S4. The graphical representations of the conformers of TS5-6 of catalyst model A and catalyst model B are shown in Fig. S4 and Fig. S5, respectively.

Table S3. Relative Gibbs free energies for various conformers of <sup>4</sup>TS5-6A.

| conformer | G (Hartree)  | $\Delta G$ (kcal/mol) |
|-----------|--------------|-----------------------|
| 1         | -2966.498635 | 0.0                   |
| 2         | -2966.496760 | 1.2                   |
| 3         | -2966.495768 | 1.8                   |
| 4         | -2966.492243 | 4.0                   |
| 5         | -2966.491981 | 4.2                   |
| 6         | -2966.490994 | 4.8                   |

Table S4. Relative Gibbs free energies for various conformers of <sup>4</sup>TS5-6B.

| conformer | G (Hartree)  | $\Delta G$ (kcal/mol) |
|-----------|--------------|-----------------------|
| 1         | -3195.346518 | 0.0                   |
| 2         | -3195.346449 | 0.0                   |
| 3         | -3195.345927 | 0.4                   |
| 4         | -3195.343531 | 1.9                   |
| 5         | -3195.343520 | 1.9                   |
| 6         | -3195.342927 | 2.3                   |
| 7         | -3195.342469 | 2.5                   |
| 8         | -3195.342159 | 2.7                   |
| 9         | -3195.341694 | 3.0                   |
| 10        | -3195.341631 | 3.1                   |
| 11        | -3195.341178 | 3.4                   |
| 12        | -3195.340676 | 3.7                   |

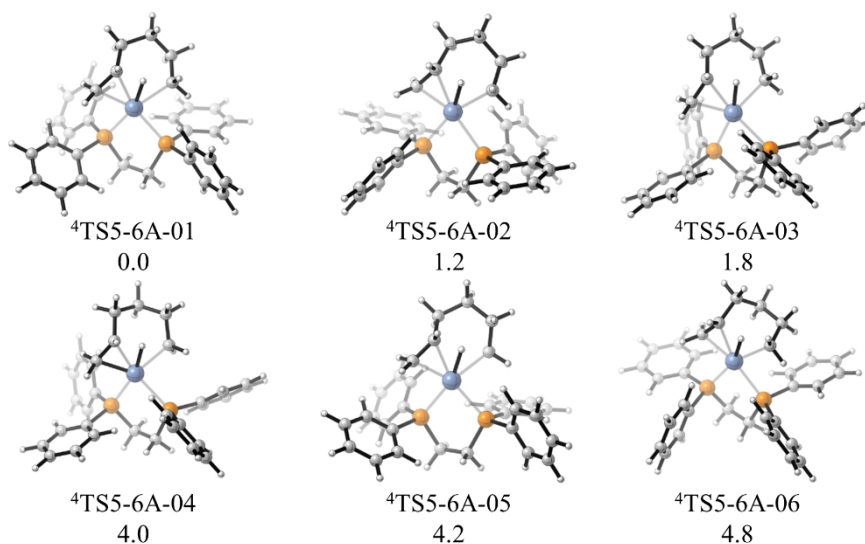

Fig. S4. Graphical representations of the conformers of TS5-6 of catalyst model A. The Gibbs free energies (kcal/mol) relative to the lowest TS5-6A are also shown.

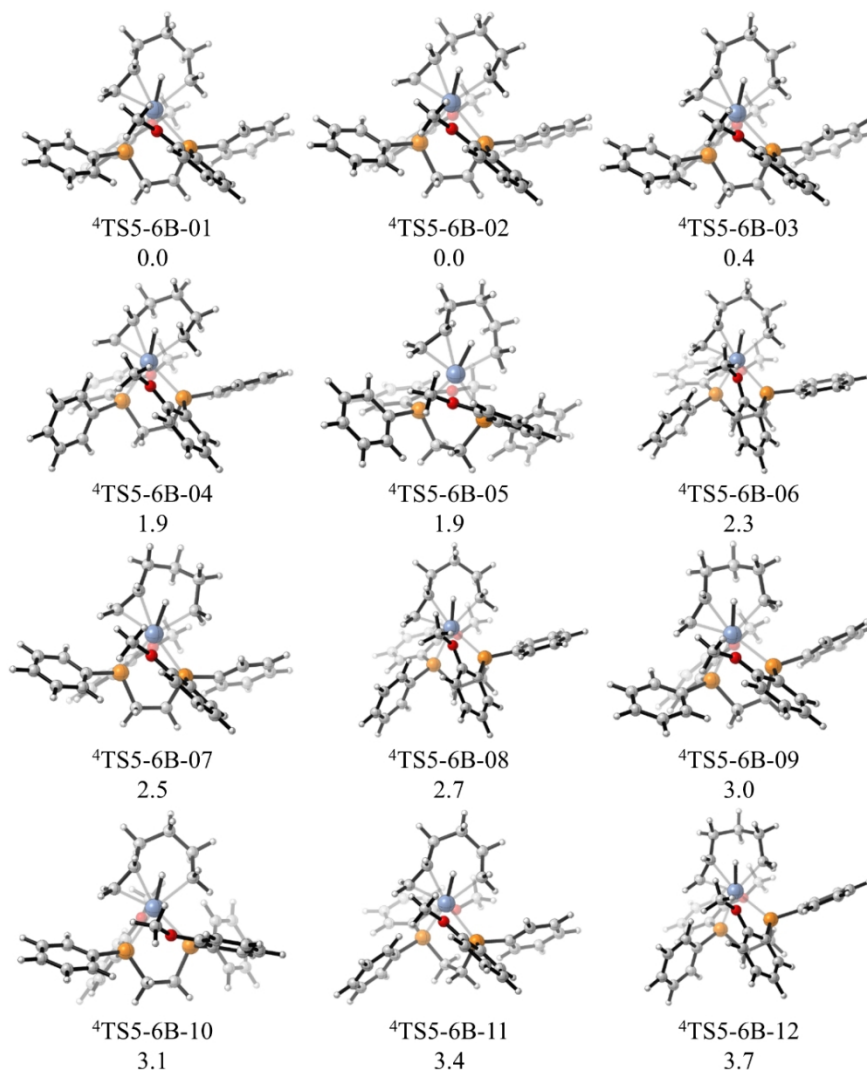

Fig. S5. Graphical representations of the conformers of TS5-6 of catalyst model B. The Gibbs free energies (kcal/mol) relative to the lowest TS5-6B are also shown.

## 5. Various conformers of transition state TS9-10

TS9-10 is another key transition state for the selective tri-/tetramerization of ethylene according to the metallacycle mechanism. CREST was utilized to generate an ensemble of conformers for the transition state TS9-10A and TS9-10B, respectively. The initial conformers were fully optimized at the B3LYP/def2-SVP level. The Gibbs free energies of the conformers are summarized in Table S5 and Table S6. The graphical representations of the conformers of TS9-10 of catalyst model A and catalyst model B are shown in Fig. S6 and Fig. S7, respectively.

Table S5. Relative Gibbs free energies for various conformers of <sup>4</sup>TS9-10A.

| conformer | G (Hartree)  | $\Delta G$ (kcal/mol) |
|-----------|--------------|-----------------------|
| 1         | -3044.999209 | 0.0                   |
| 2         | -3044.996666 | 1.6                   |
| 3         | -3044.996538 | 1.7                   |
| 4         | -3044.996266 | 1.9                   |
| 5         | -3044.996205 | 1.9                   |
| 6         | -3044.996198 | 1.9                   |
| 7         | -3044.994598 | 2.9                   |
| 8         | -3044.99423  | 3.1                   |
| 9         | -3044.993681 | 3.5                   |
| 10        | -3044.993433 | 3.6                   |
| 11        | -3044.99261  | 4.1                   |
| 12        | -3044.992583 | 4.2                   |
| 13        | -3044.991932 | 4.6                   |
| 14        | -3044.991837 | 4.6                   |
| 15        | -3044.991634 | 4.8                   |
| 16        | -3044.991492 | 4.8                   |
| 17        | -3044.991358 | 4.9                   |
| 18        | -3044.991169 | 5.1                   |
| 19        | -3044.988736 | 6.6                   |
| 20        | -3044.986738 | 7.8                   |
| 21        | -3044.981416 | 11.2                  |

Table S6. Relative Gibbs free energies for various conformers of <sup>4</sup>TS9-10B.

| conformer | G (Hartree)  | $\Delta G$ (kcal/mol) |
|-----------|--------------|-----------------------|
| 1         | -3273.844406 | 0.0                   |
| 2         | -3273.842082 | 1.5                   |
| 3         | -3273.841173 | 2.0                   |
| 4         | -3273.841132 | 2.1                   |
| 5         | -3273.840341 | 2.6                   |
| 6         | -3273.840334 | 2.6                   |
| 7         | -3273.840230 | 2.6                   |
| 8         | -3273.839354 | 3.2                   |
| 9         | -3273.839204 | 3.3                   |
| 10        | -3273.838729 | 3.6                   |
| 11        | -3273.838617 | 3.6                   |
| 12        | -3273.838435 | 3.7                   |
| 13        | -3273.838250 | 3.9                   |
| 14        | -3273.838050 | 4.0                   |
| 15        | -3273.837710 | 4.2                   |
| 16        | -3273.837632 | 4.3                   |
| 17        | -3273.837405 | 4.4                   |
| 18        | -3273.837341 | 4.4                   |
| 19        | -3273.836869 | 4.7                   |
| 20        | -3273.836611 | 4.9                   |
| 21        | -3273.836206 | 5.1                   |
| 22        | -3273.835116 | 5.8                   |
| 23        | -3273.834976 | 5.9                   |
| 24        | -3273.834670 | 6.1                   |
| 25        | -3273.834326 | 6.3                   |



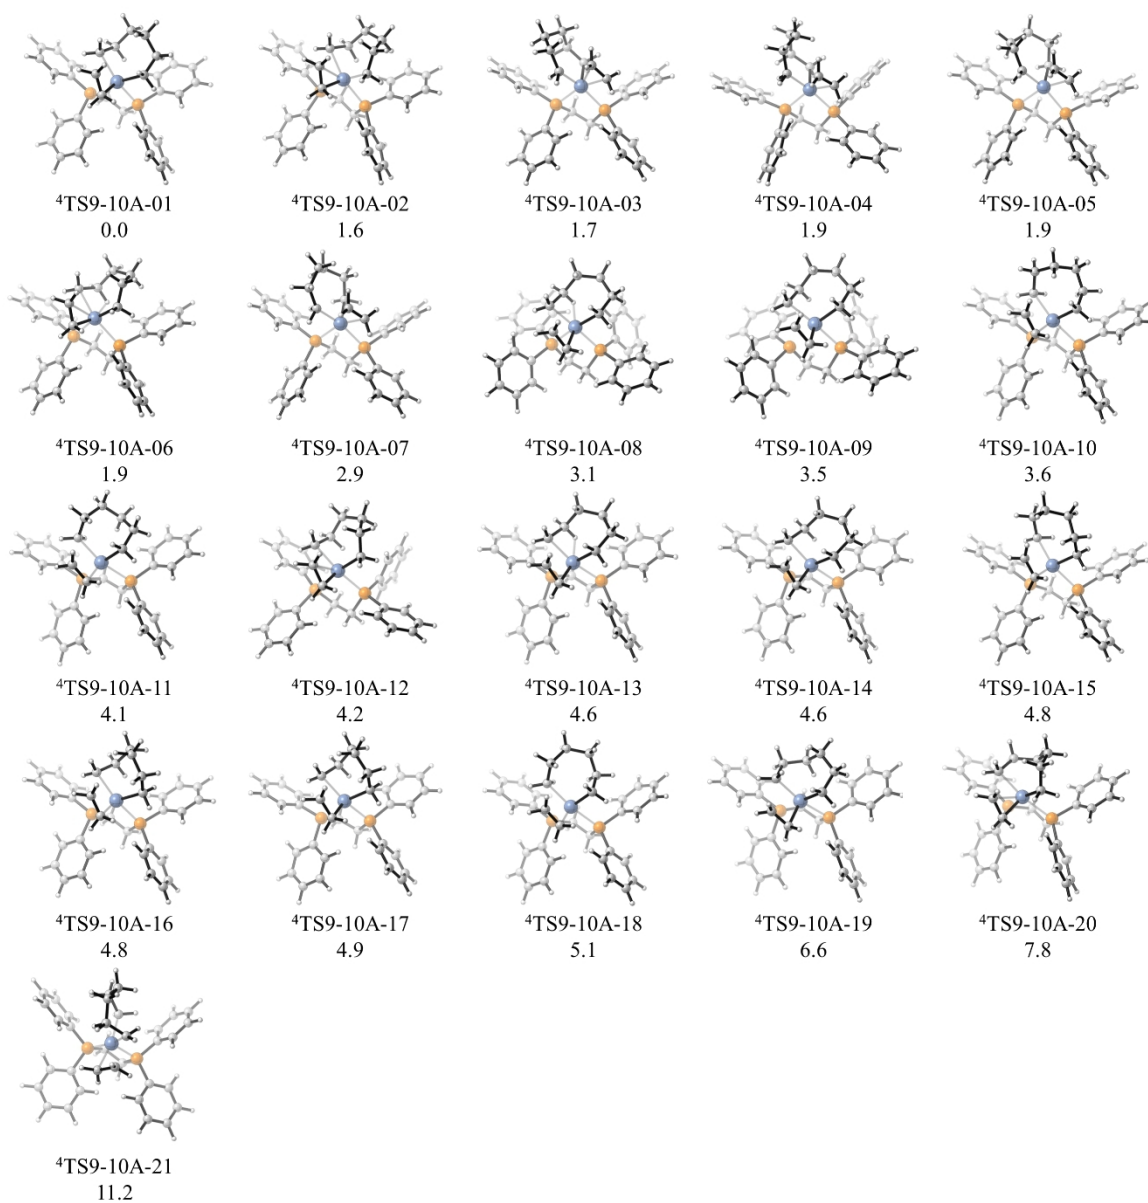

Fig. S6. Graphical representations of the conformers of TS9-10 of catalyst model A. The Gibbs free energies (kcal/mol) relative to the lowest TS9-10A are also shown.

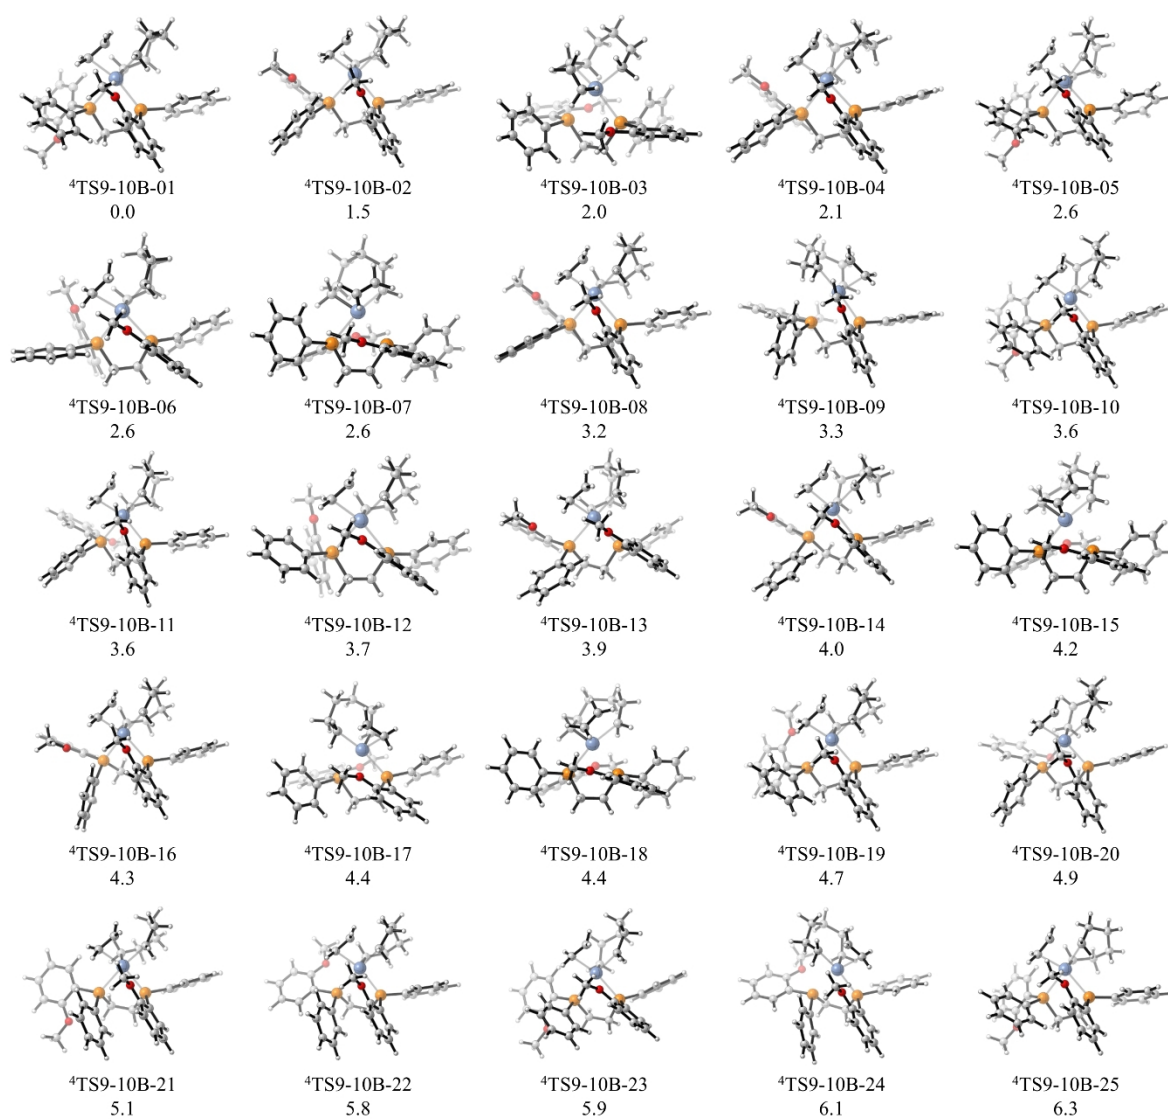

Fig. S7. Graphical representations of the conformers of TS9-10 of catalyst model B. The Gibbs free energies (kcal/mol) relative to the lowest TS9-10B are also shown.

6. Various conformers of the key intermediates chromacyclopentane (3), chromacycloheptane (5), and chromacyclononane (10)

Chromacyclopentane (3), chromacycloheptane (5), and chromacyclononane (10) are key intermediates for the selective tri-/tetramerization of ethylene according to the metallacycle mechanism. CREST was utilized to generate an ensemble of conformers for the key intermediates chromacyclopentane (3), chromacycloheptane (5), and chromacyclononane (10) of catalyst model A and catalyst model B, respectively. The initial conformers were fully optimized at the B3LYP/def2-SVP level. The Gibbs free energies of the conformers are summarized in Table S7-S12.

Table S7. Relative Gibbs free energies for various conformers of chromacyclopentane <sup>43A</sup>.

| conformer | G (Hartree)  | $\Delta G$ (kcal/mol) |
|-----------|--------------|-----------------------|
| 1         | -2887.989351 | 0.0                   |
| 2         | -2887.987581 | 1.1                   |
| 3         | -2887.987504 | 1.2                   |
| 4         | -2887.987011 | 1.5                   |
| 5         | -2887.986810 | 1.6                   |
| 6         | -2887.986574 | 1.7                   |
| 7         | -2887.986567 | 1.7                   |
| 8         | -2887.986352 | 1.9                   |
| 9         | -2887.986281 | 1.9                   |
| 10        | -2887.986063 | 2.1                   |
| 11        | -2887.985556 | 2.4                   |
| 12        | -2887.985346 | 2.5                   |
| 13        | -2887.984688 | 2.9                   |
| 14        | -2887.984081 | 3.3                   |
| 15        | -2887.983908 | 3.4                   |
| 16        | -2887.983907 | 3.4                   |
| 17        | -2887.982647 | 4.2                   |
| 18        | -2887.980245 | 5.7                   |
| 19        | -2887.976619 | 8.0                   |

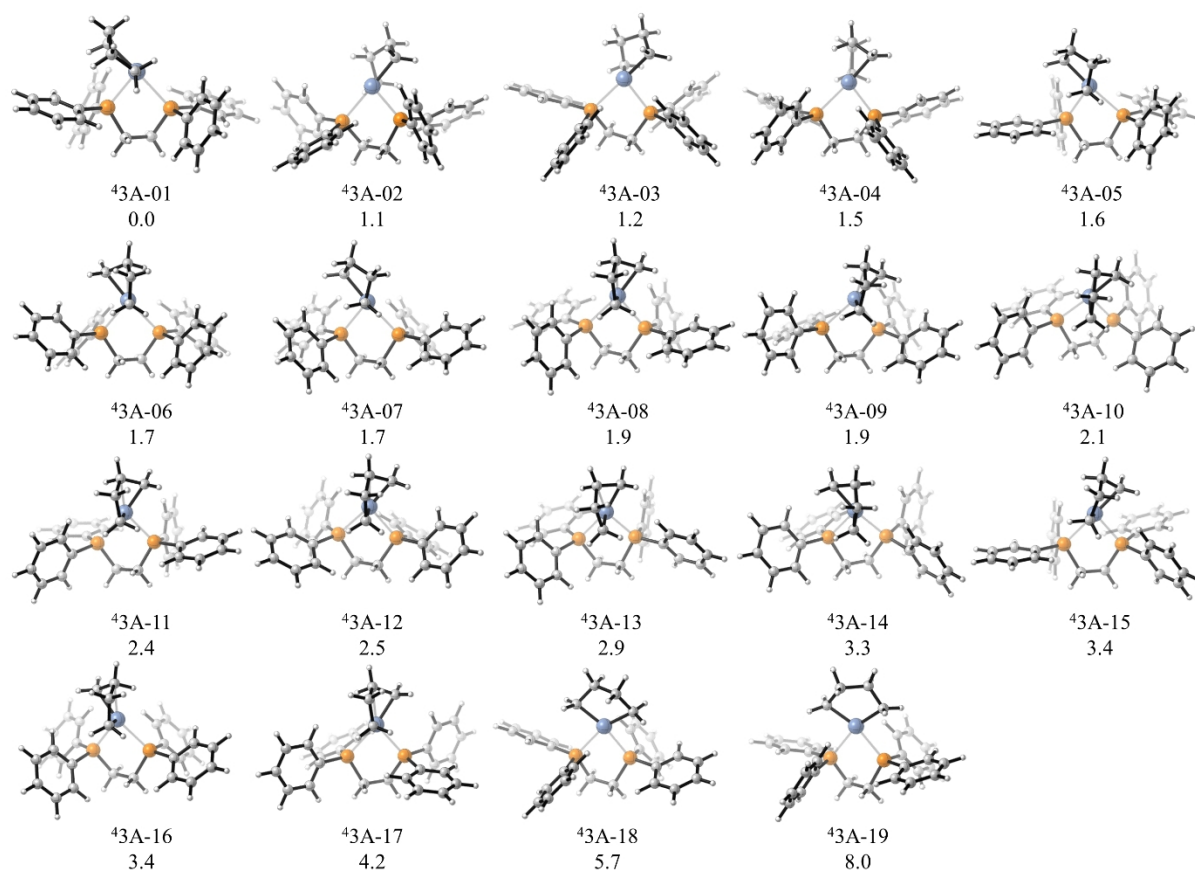

Fig. S8. Graphical representations of the conformers of <sup>43</sup> of catalyst model A. The Gibbs free energies (kcal/mol) relative to the lowest <sup>43</sup>A are also shown.

Table S8. Relative Gibbs free energies for various conformers of chromacycloheptane <sup>45</sup>A.

| conformer | G (Hartree)  | $\Delta G$ (kcal/mol) |
|-----------|--------------|-----------------------|
| 1         | -2966.523013 | 0.0                   |
| 2         | -2966.522824 | 0.1                   |
| 3         | -2966.521870 | 0.7                   |
| 4         | -2966.521741 | 0.8                   |
| 5         | -2966.521391 | 1.0                   |
| 6         | -2966.521285 | 1.1                   |
| 7         | -2966.521284 | 1.1                   |
| 8         | -2966.520884 | 1.3                   |
| 9         | -2966.520370 | 1.7                   |
| 10        | -2966.519920 | 1.9                   |
| 11        | -2966.518903 | 2.6                   |
| 12        | -2966.517417 | 3.5                   |

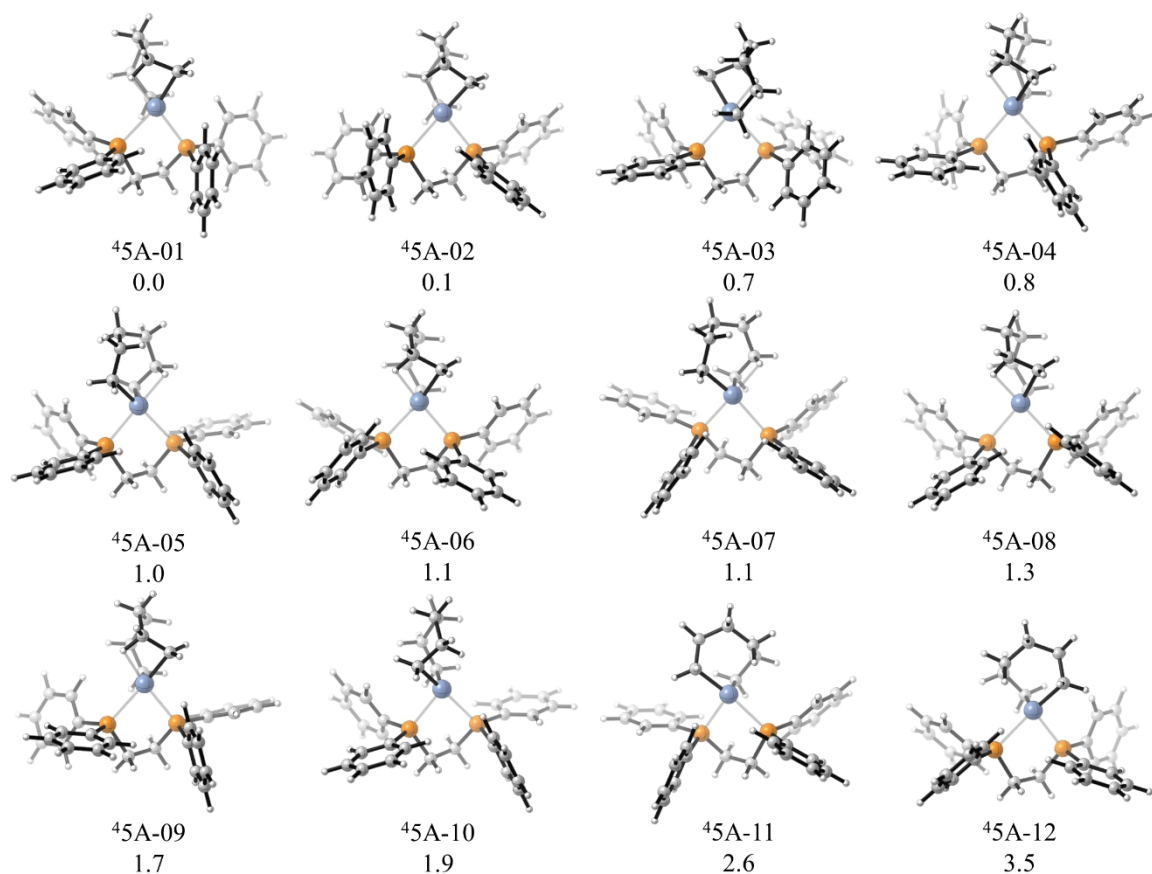

Fig. S9. Graphical representations of the conformers of <sup>45</sup> of catalyst model A. The Gibbs free energies (kcal/mol) relative to the lowest <sup>45</sup>A are also shown.

Table S9. Relative Gibbs free energies for various conformers of chromacyclononane <sup>4</sup>10A.

| conformer | G (Hartree)  | $\Delta G$ (kcal/mol) |
|-----------|--------------|-----------------------|
| 1         | -3045.044339 | 0.0                   |
| 2         | -3045.044121 | 0.1                   |
| 3         | -3045.043507 | 0.5                   |
| 4         | -3045.042668 | 1.0                   |
| 5         | -3045.042422 | 1.2                   |
| 6         | -3045.042398 | 1.2                   |
| 7         | -3045.042074 | 1.4                   |
| 8         | -3045.042030 | 1.4                   |
| 9         | -3045.041961 | 1.5                   |
| 10        | -3045.041599 | 1.7                   |
| 11        | -3045.041582 | 1.7                   |
| 12        | -3045.041358 | 1.9                   |
| 13        | -3045.041126 | 2.0                   |
| 14        | -3045.040805 | 2.2                   |
| 15        | -3045.040264 | 2.6                   |
| 16        | -3045.040168 | 2.6                   |
| 17        | -3045.039878 | 2.8                   |
| 18        | -3045.039729 | 2.9                   |
| 19        | -3045.039481 | 3.0                   |
| 20        | -3045.038872 | 3.4                   |
| 21        | -3045.038187 | 3.9                   |
| 22        | -3045.038132 | 3.9                   |
| 23        | -3045.038047 | 3.9                   |
| 24        | -3045.037388 | 4.4                   |
| 25(10')   | -3045.034126 | 6.4                   |

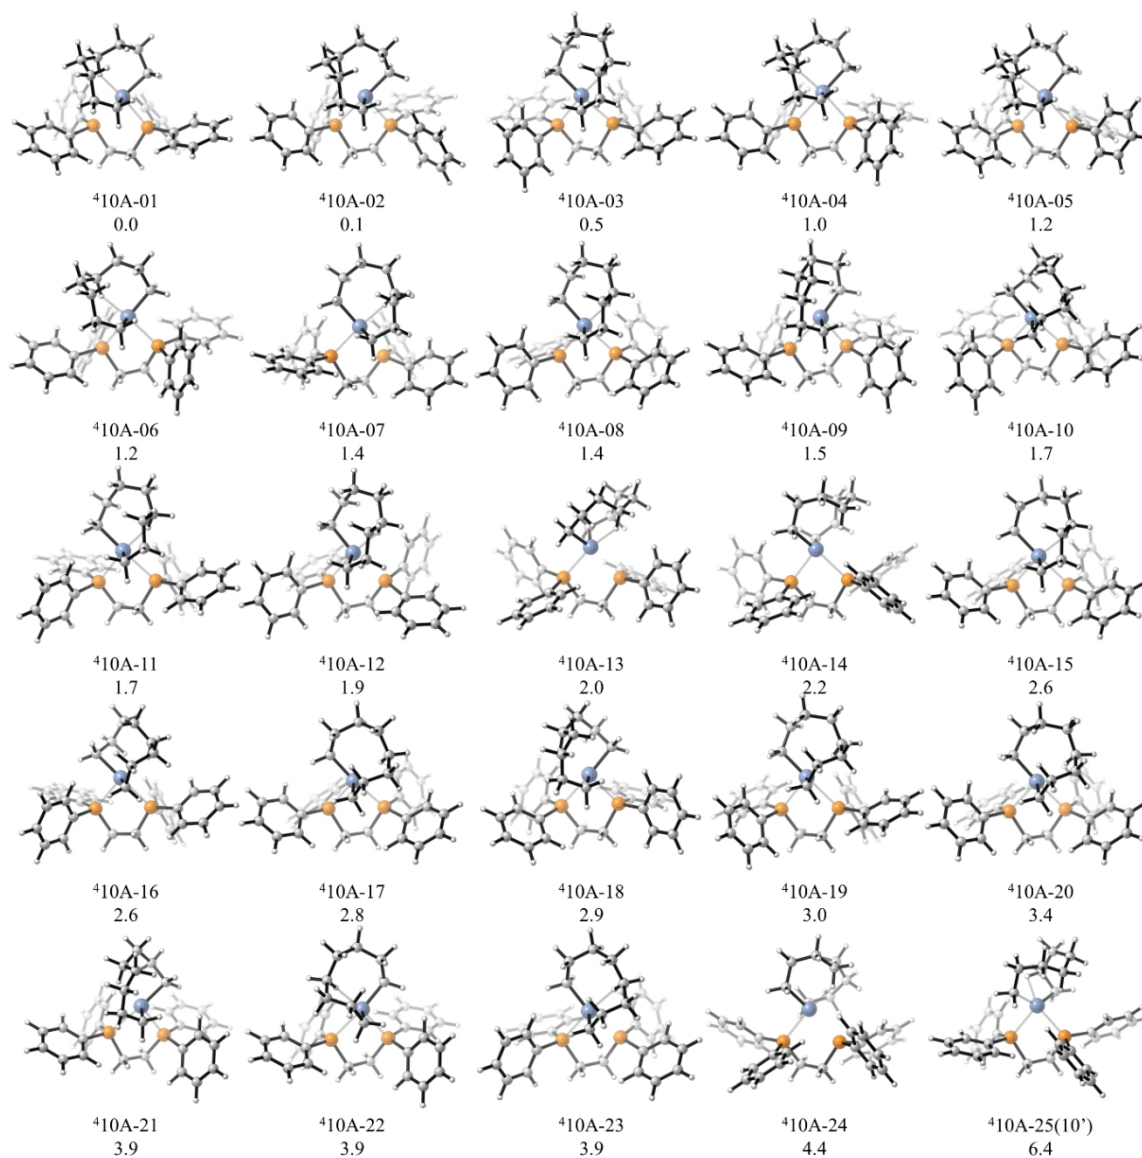

Fig. S10. Graphical representations of the conformers of <sup>4</sup>10 of catalyst model A. The Gibbs free energies (kcal/mol) relative to the lowest <sup>4</sup>10A are also shown.

Table S10. Relative Gibbs free energies for various conformers of chromacyclopentane <sup>43</sup>B.

| conformer | G (Hartree)  | $\Delta G$ (kcal/mol) |
|-----------|--------------|-----------------------|
| 1         | -3116.848140 | 0.0                   |
| 2         | -3116.848026 | 0.1                   |
| 3         | -3116.846313 | 1.1                   |
| 4         | -3116.845426 | 1.7                   |
| 5         | -3116.844345 | 2.4                   |
| 6         | -3116.843608 | 2.8                   |
| 7         | -3116.843050 | 3.2                   |
| 8         | -3116.841953 | 3.9                   |
| 9         | -3116.841032 | 4.5                   |
| 10        | -3116.833718 | 9.0                   |

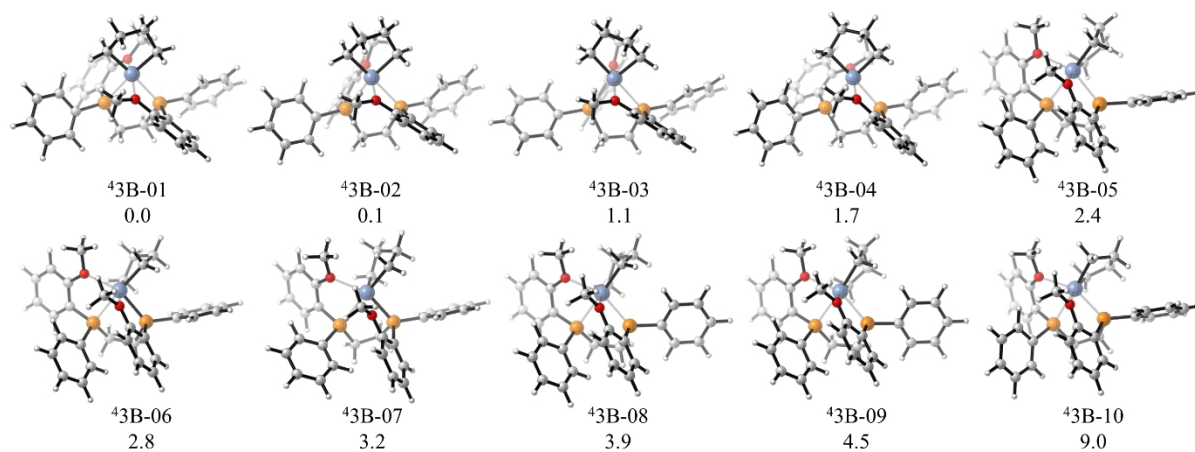

Fig. S11. Graphical representations of the conformers of <sup>43</sup>B of catalyst model B. The Gibbs free energies (kcal/mol) relative to the lowest <sup>43</sup>B are also shown.



Table S11. Relative Gibbs free energies for various conformers of chromacycloheptane <sup>45</sup>B.

| conformer | G (Hartree)  | $\Delta G$ (kcal/mol) |
|-----------|--------------|-----------------------|
| 1         | -3195.370743 | 0.0                   |
| 2         | -3195.370432 | 0.2                   |
| 3         | -3195.370095 | 0.4                   |
| 4         | -3195.369962 | 0.5                   |
| 5         | -3195.369846 | 0.6                   |
| 6         | -3195.369083 | 1.0                   |
| 7         | -3195.368791 | 1.2                   |
| 8         | -3195.368731 | 1.3                   |
| 9         | -3195.368419 | 1.5                   |
| 10        | -3195.368264 | 1.6                   |
| 11        | -3195.367038 | 2.3                   |
| 12        | -3195.367027 | 2.3                   |
| 13        | -3195.365565 | 3.2                   |
| 14        | -3195.365216 | 3.5                   |
| 15        | -3195.364929 | 3.6                   |
| 16        | -3195.364074 | 4.2                   |
| 17        | -3195.363751 | 4.4                   |
| 18        | -3195.363255 | 4.7                   |
| 19        | -3195.361717 | 5.7                   |

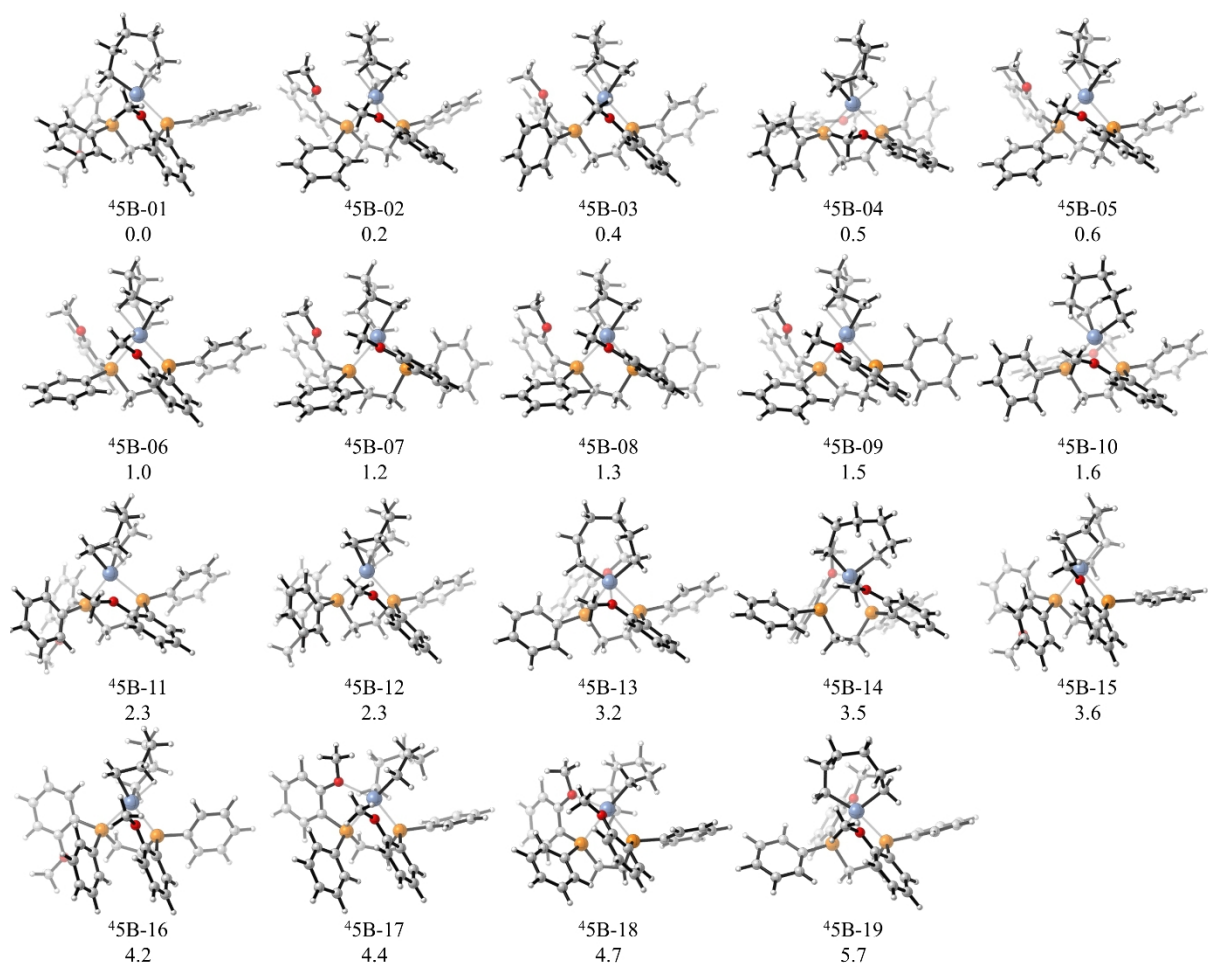

Fig. S12. Graphical representations of the conformers of <sup>45</sup> of catalyst model B. The Gibbs free energies (kcal/mol) relative to the lowest <sup>45</sup>B are also shown.

Table S12. Relative Gibbs free energies for various conformers of chromacyclononane <sup>4</sup>10B.

| conformer | G (Hartree)  | $\Delta G$ (kcal/mol) |
|-----------|--------------|-----------------------|
| 1         | -3273.888786 | 0.0                   |
| 2         | -3273.888655 | 0.1                   |
| 3         | -3273.888159 | 0.4                   |
| 4         | -3273.887907 | 0.6                   |
| 5         | -3273.887820 | 0.6                   |
| 6         | -3273.887312 | 0.9                   |
| 7         | -3273.886331 | 1.5                   |
| 8         | -3273.885748 | 1.9                   |
| 9         | -3273.885241 | 2.2                   |
| 10        | -3273.885141 | 2.3                   |
| 11        | -3273.884590 | 2.6                   |
| 12        | -3273.884517 | 2.7                   |
| 13        | -3273.884479 | 2.7                   |
| 14        | -3273.883324 | 3.4                   |
| 15        | -3273.882991 | 3.6                   |
| 16        | -3273.882683 | 3.8                   |
| 17(10')   | -3273.882573 | 3.9                   |
| 18        | -3273.882536 | 3.9                   |
| 19        | -3273.881614 | 4.5                   |
| 20        | -3273.881083 | 4.8                   |

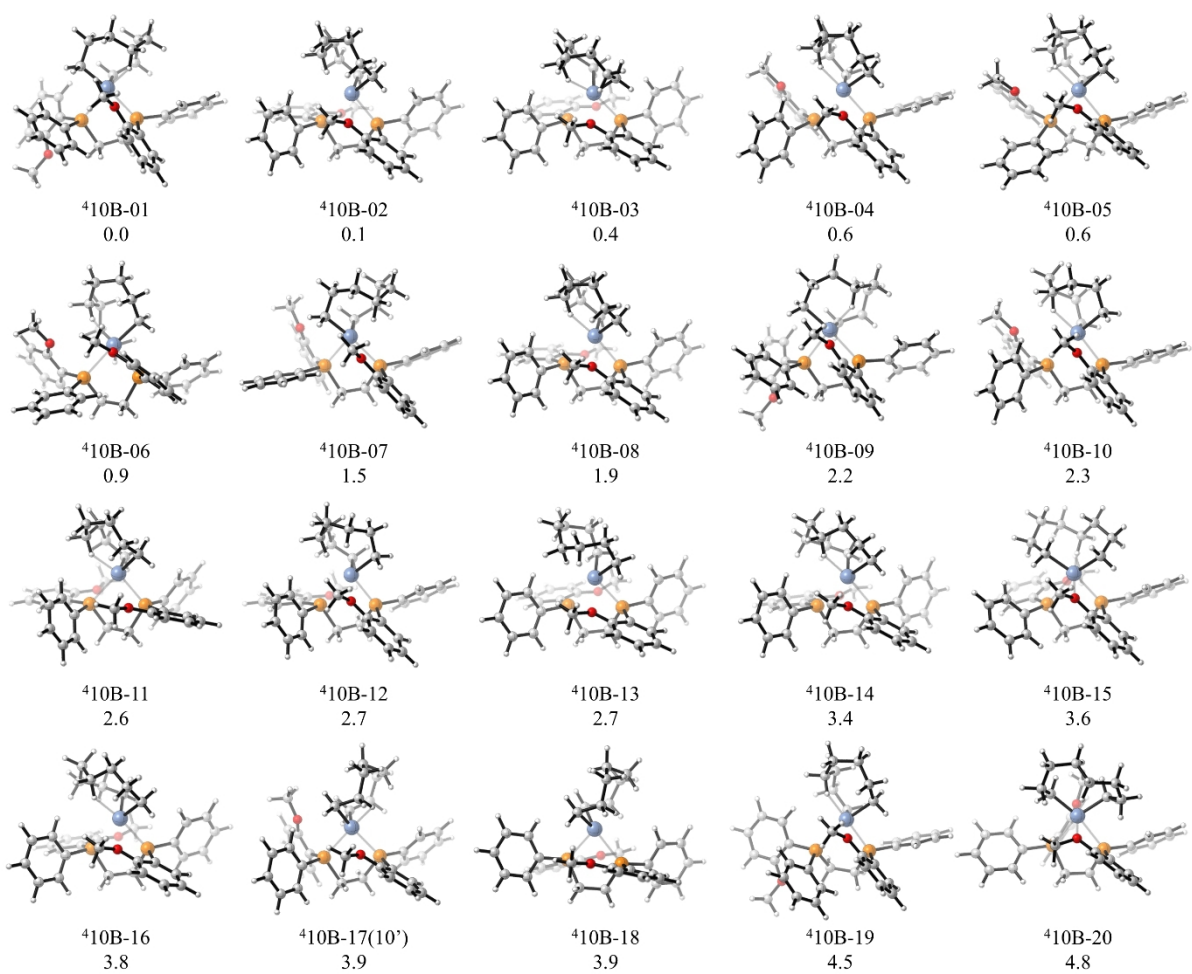

Fig. S13. Graphical representations of the conformers of <sup>4</sup>10 of catalyst model B. The Gibbs free energies (kcal/mol) relative to the lowest <sup>4</sup>10B are also shown.

## 7. Various conformers of the ethylene-coordinated complex 9

The ethylene-coordinated complex 9 is of crucial importance to investigate the role of the hemilabile methoxy group. CREST was utilized to generate an ensemble of conformers for the intermediate 9 of catalyst model A and catalyst model B, respectively. The initial conformers were fully optimized at the B3LYP/def2-SVP level. The Gibbs free energies of the conformers are summarized in Table S13 and Table S14.

Table S13. Relative Gibbs free energies for various conformers of <sup>49</sup>A.

| conformer | G (Hartree)  | $\Delta G$ (kcal/mol) |
|-----------|--------------|-----------------------|
| 1         | -3045.023605 | 0.0                   |
| 2         | -3045.023153 | 0.3                   |
| 3         | -3045.022805 | 0.5                   |
| 4         | -3045.022410 | 0.7                   |
| 5         | -3045.022071 | 1.0                   |
| 6         | -3045.021911 | 1.1                   |
| 7         | -3045.021514 | 1.3                   |
| 8         | -3045.020850 | 1.7                   |
| 9         | -3045.019616 | 2.5                   |
| 10        | -3045.018788 | 3.0                   |
| 11        | -3045.017928 | 3.6                   |
| 12        | -3045.017824 | 3.6                   |
| 13        | -3045.017620 | 3.8                   |
| 14        | -3045.017426 | 3.9                   |
| 15        | -3045.017174 | 4.0                   |
| 16        | -3045.016591 | 4.4                   |
| 17        | -3045.016236 | 4.6                   |
| 18        | -3045.016122 | 4.7                   |
| 19        | -3045.016014 | 4.8                   |
| 20        | -3045.015868 | 4.9                   |
| 21        | -3045.015361 | 5.2                   |
| 22        | -3045.015299 | 5.2                   |
| 23        | -3045.014319 | 5.8                   |

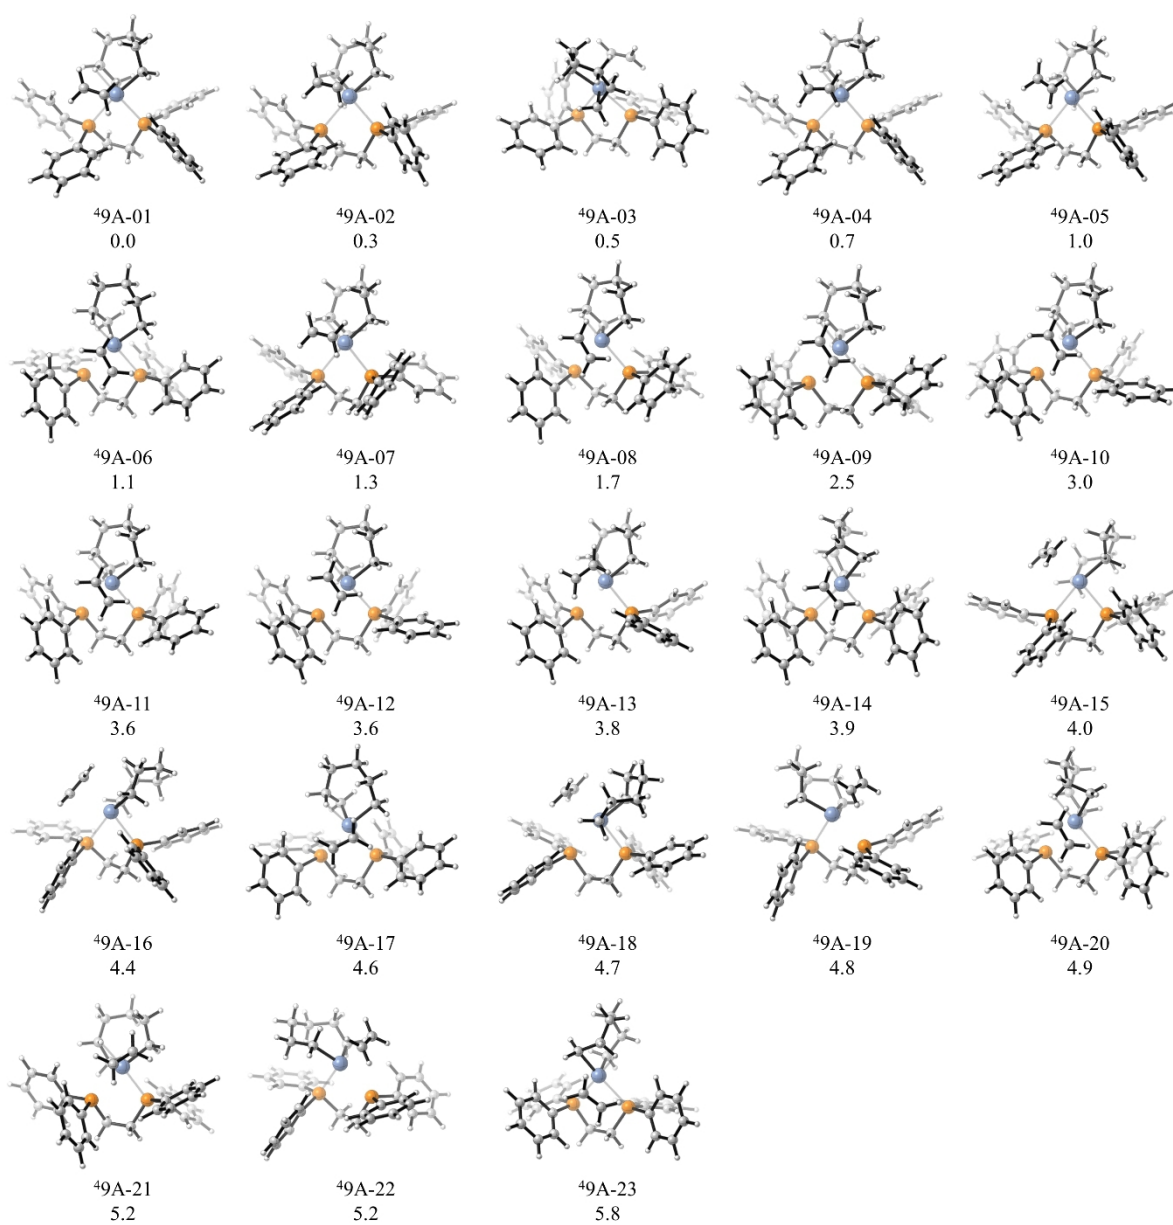

Fig. S14. Graphical representations of the conformers of <sup>49</sup>A of catalyst model A. The Gibbs free energies (kcal/mol) relative to the lowest <sup>49</sup>A are also shown.

Table S14. Relative Gibbs free energies for various conformers of <sup>4</sup>9B.

| conformer | G (Hartree)  | $\Delta G$ (kcal/mol) |
|-----------|--------------|-----------------------|
| 1         | -3273.863022 | 0.0                   |
| 2         | -3273.861419 | 1.0                   |
| 3         | -3273.861132 | 1.2                   |
| 4         | -3273.860830 | 1.4                   |
| 5         | -3273.860630 | 1.5                   |
| 6         | -3273.860438 | 1.6                   |
| 7         | -3273.859915 | 1.9                   |
| 8         | -3273.859796 | 2.0                   |
| 9         | -3273.859636 | 2.1                   |
| 10        | -3273.858818 | 2.6                   |
| 11        | -3273.858390 | 2.9                   |
| 12        | -3273.857032 | 3.8                   |
| 13        | -3273.856947 | 3.8                   |
| 14        | -3273.856620 | 4.0                   |
| 15        | -3273.856511 | 4.1                   |
| 16        | -3273.854714 | 5.2                   |
| 17        | -3273.852404 | 6.7                   |
| 18        | -3273.851829 | 7.0                   |

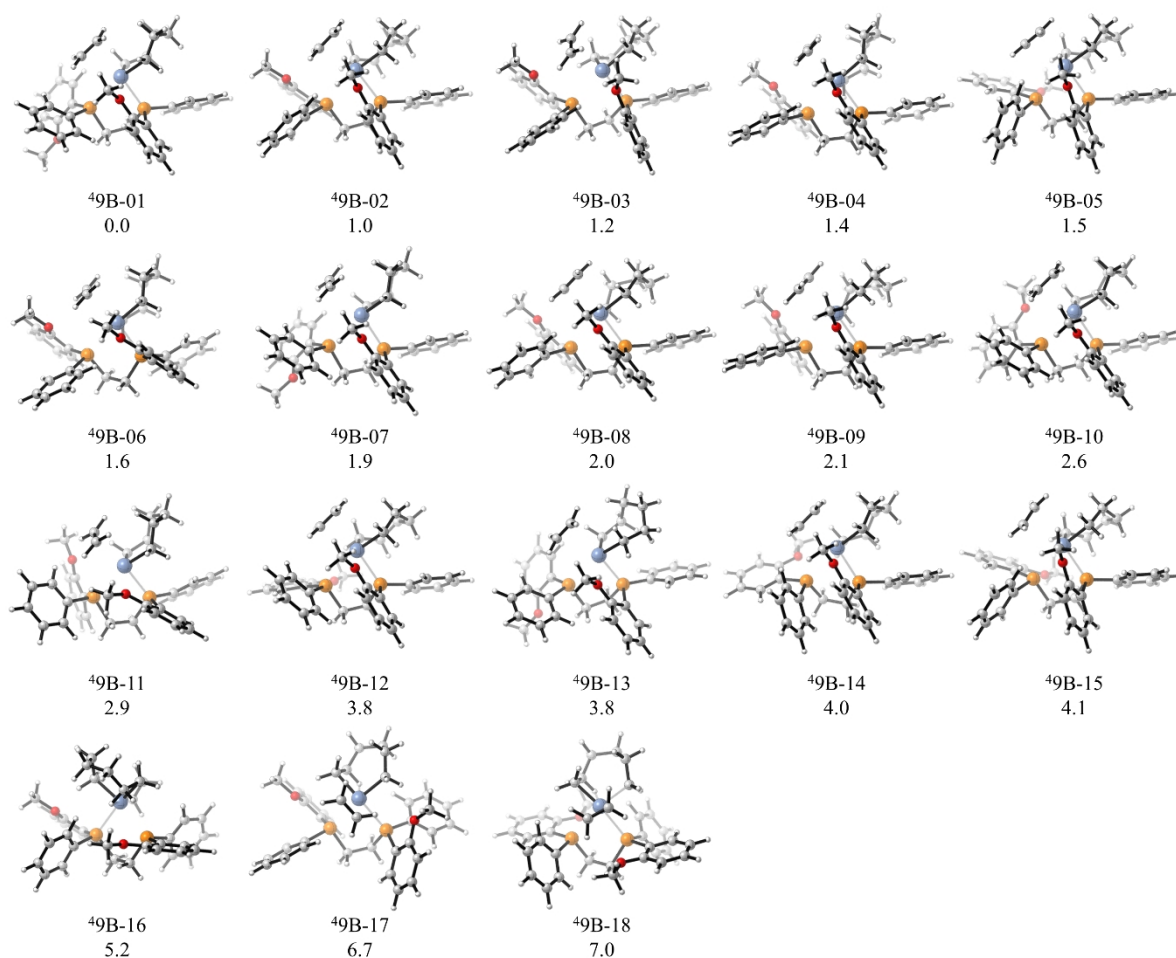

Fig. S15. Graphical representations of the conformers of <sup>49</sup>B of catalyst model B. The Gibbs free energies (kcal/mol) relative to the lowest <sup>49</sup>B are also shown.



## 8. Geometrical features of the intermediates and the transition states of catalyst model A and catalyst model B

Table S15. Geometrical features of the intermediates and the transition states of catalyst model A.

| Intermediates         | P-Cr-P<br>angle (deg) | Cr-P<br>distance (Å) | $\Delta$ Cr-P (Å) |
|-----------------------|-----------------------|----------------------|-------------------|
| <sup>6</sup> 1A       | 82.4                  | 2.551, 2.557         | 0.006             |
| <sup>6</sup> 2A       | 82.9                  | 2.549, 2.546         | 0.003             |
| <sup>4</sup> TS2-3A   | 76.9                  | 2.469, 2.469         | 0                 |
| <sup>4</sup> 3A       | 82.9                  | 2.597, 2.466         | 0.131             |
| <sup>4</sup> 4A       | 79.8                  | 2.589, 2.475         | 0.114             |
| <sup>4</sup> TS4-5A   | 79.4                  | 2.493, 2.588         | 0.095             |
| <sup>4</sup> 5A       | 81.4                  | 2.459, 2.582         | 0.123             |
| <sup>4</sup> TS5-6A   | 78.9                  | 2.499, 2.486         | 0.013             |
| <sup>6</sup> 6A       | 83.4                  | 2.559, 2.544         | 0.015             |
| <sup>4</sup> 9A       | 80.9                  | 2.469, 2.606         | 0.138             |
| <sup>4</sup> TS9-10A  | 78.1                  | 2.514, 2.662         | 0.147             |
| <sup>4</sup> 10A      | 80.4                  | 2.641, 2.445         | 0.196             |
| <sup>4</sup> 10A'     | 81.0                  | 2.502, 2.477         | 0.025             |
| <sup>4</sup> TS10-11A | 77.7                  | 2.485, 2.509         | 0.024             |
| <sup>6</sup> 11A      | 82.9                  | 2.566, 2.561         | 0.005             |

Table S16. Geometrical features of the intermediates and the transition states of catalyst model B.

| Intermediates         | P-Cr-P<br>angle (deg) | Cr-P<br>distance (Å) | $\Delta$ Cr-P<br>(Å) | Cr-O<br>distance (Å) | $\Delta$ Cr-O<br>(Å) |
|-----------------------|-----------------------|----------------------|----------------------|----------------------|----------------------|
| <sup>6</sup> 1B       | 82.3                  | 2.540, 2.530         | 0.010                | 2.949, 2.777         | 0.172                |
| <sup>6</sup> 2B       | 82.3                  | 2.530, 2.535         | 0.006                | 3.211, 3.231         | 0.020                |
| <sup>4</sup> TS2-3B   | 76.0                  | 2.482, 2.482         | 0                    | 2.565, 2.565         | 0                    |
| <sup>4</sup> 3B       | 78.1                  | 2.515, 2.533         | 0.018                | 2.166, 2.161         | 0.004                |
| <sup>4</sup> 4B       | 78.8                  | 2.421, 2.658         | 0.237                | 2.353, 4.014         | 1.661                |
| <sup>4</sup> TS4-5B   | 78.7                  | 2.494, 2.552         | 0.059                | 2.396, 5.503         | 3.107                |
| <sup>4</sup> 5B       | 80.6                  | 2.481, 2.538         | 0.057                | 2.331, 5.419         | 3.087                |
| <sup>4</sup> TS5-6B   | 77.3                  | 2.508, 2.463         | 0.045                | 2.613, 2.782         | 0.169                |
| <sup>6</sup> 6B       | 82.9                  | 2.538, 2.532         | 0.006                | 2.963, 2.768         | 0.195                |
| <sup>4</sup> 9B       | 78.3                  | 2.437, 2.746         | 0.309                | 2.430, 5.720         | 3.290                |
| <sup>4</sup> TS9-10B  | 78.6                  | 2.566, 2.501         | 0.065                | 2.416, 5.511         | 3.094                |
| <sup>4</sup> 10B      | 81.0                  | 2.399, 2.668         | 0.269                | 2.390, 3.997         | 1.607                |
| <sup>4</sup> 10B'     | 83.2                  | 2.500, 2.545         | 0.045                | 2.479, 3.551         | 1.071                |
| <sup>4</sup> TS10-11B | 76.5                  | 2.495, 2.552         | 0.058                | 2.542, 2.972         | 0.430                |
| <sup>6</sup> 11B      | 82.5                  | 2.544, 2.542         | 0.002                | 2.856, 2.987         | 0.131                |

## 9. Steric map for the intermediate 3 and 5

The topographic steric maps of the intermediates 3 and 5 were probed using SambVca. The center of the sphere is set to the location of atom Cr. C-C (from carbon bridge) defines the z-axis. P defines the xz-plane. The sphere radius is set to 3.5 Å.

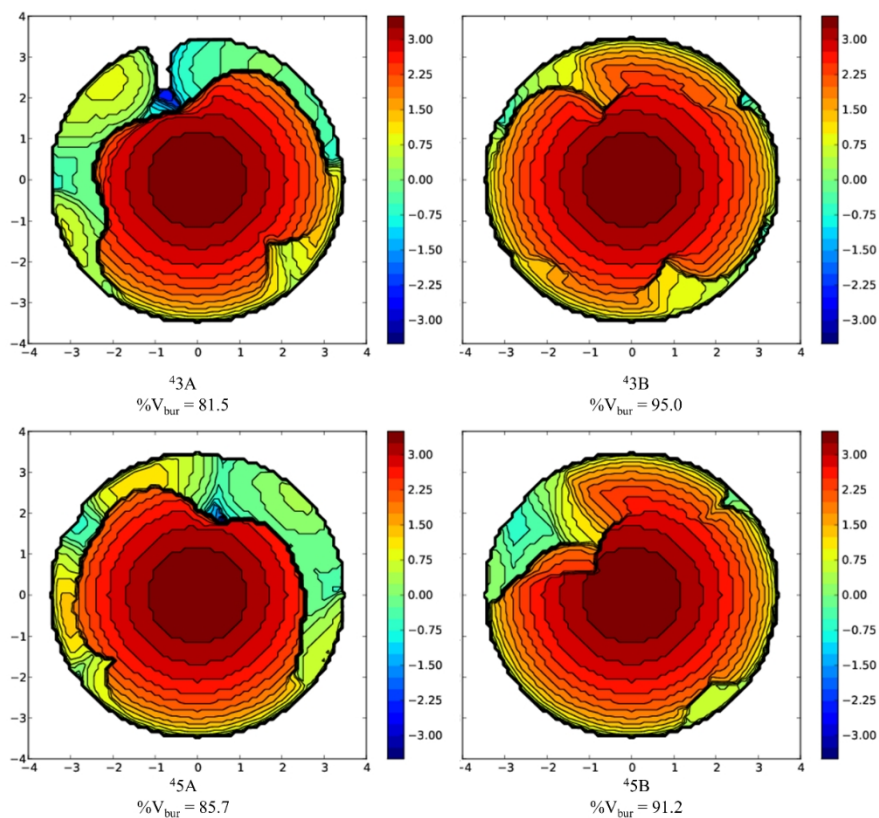

Fig. S16. Topographic steric maps of intermediate 3 (Top) and intermediate 5 (Bottom) of catalyst model A (Left) and catalyst model B (Right). The chromium center was removed for the buried volume calculations.

## 10. Graphical representations for the intermediates and transition states

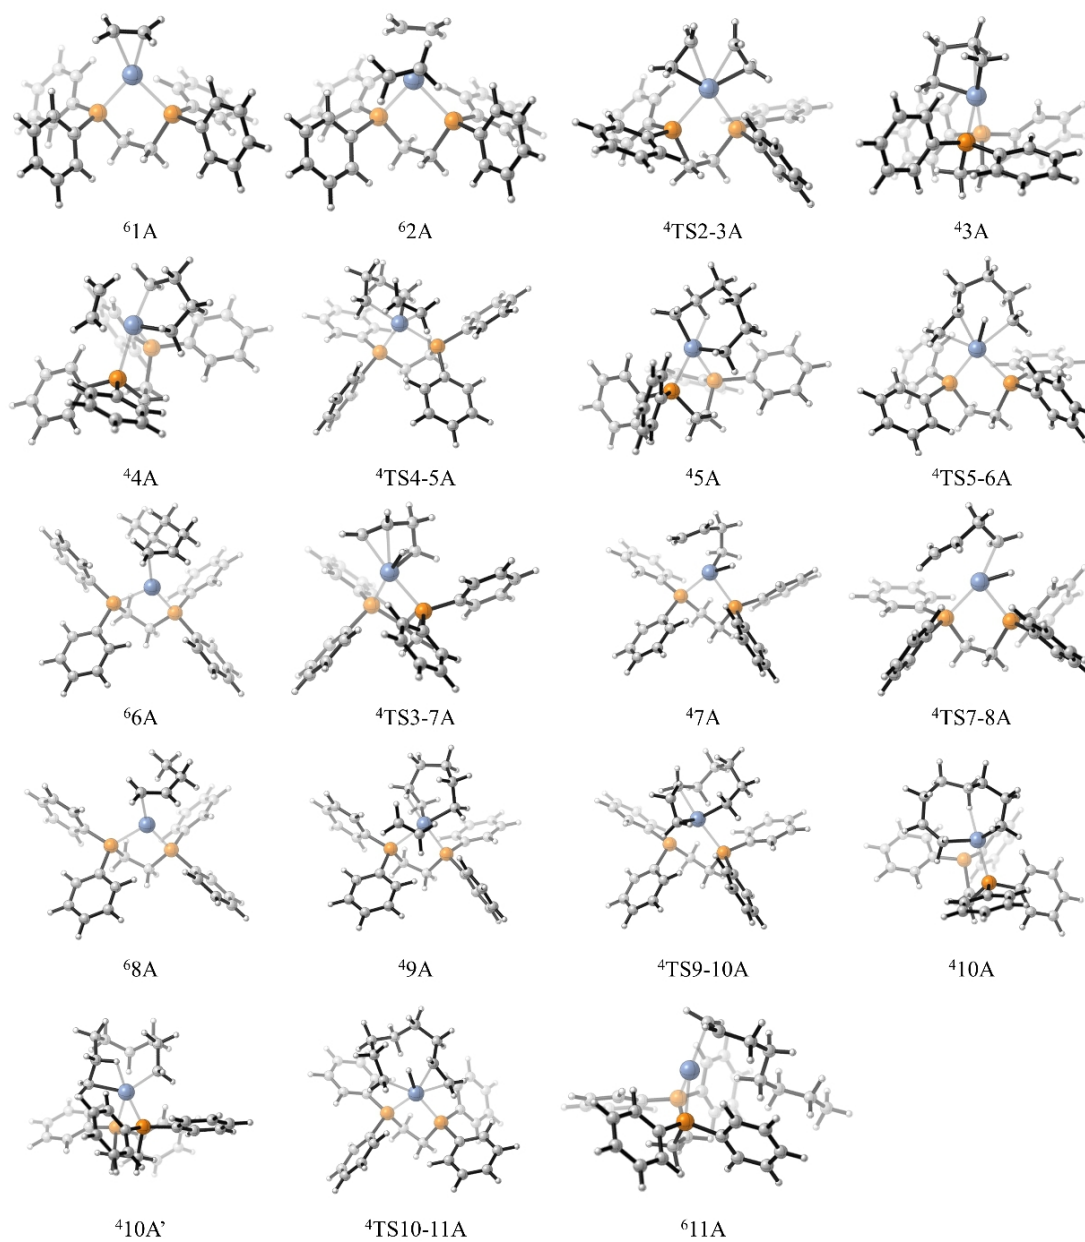

Fig. S17. Graphical representations for the intermediates and transition states of catalyst model A.

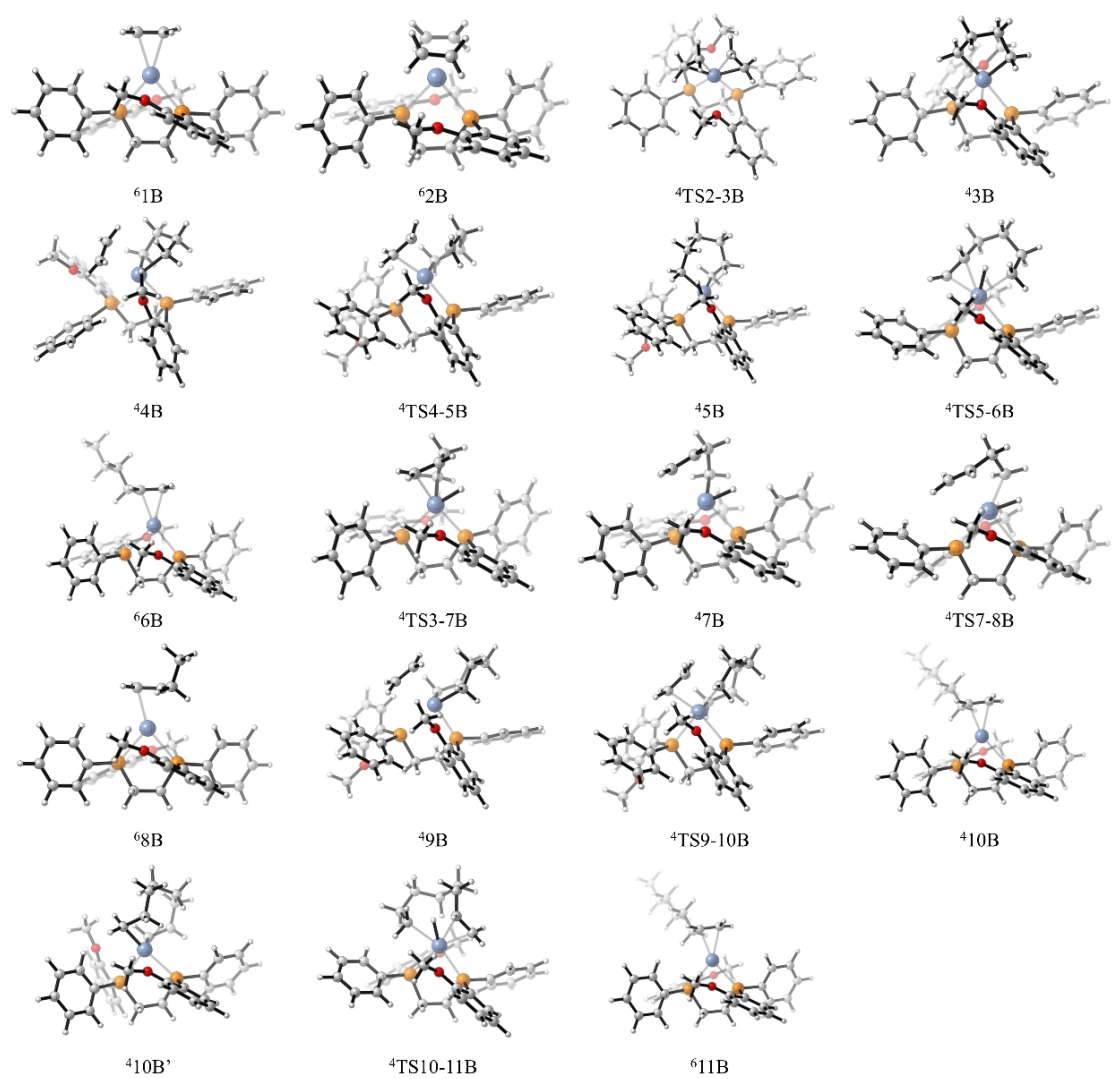

Fig. S18. Graphical representations for the intermediates and transition states of catalyst model B.

## 11. The Cr-PCCP<sup>Et</sup> catalyst model C

CREST was utilized to generate an ensemble of conformers for the key intermediate 5, 9 and the key transition states TS5-6, TS9-10 of catalyst model C (Cr-PCCP<sup>Et</sup>), respectively. The initial conformers were fully optimized at the B3LYP/def2-SVP level. The optimized geometries of the lowest energy conformation for the key intermediates and transition states are depicted in Fig. S11.

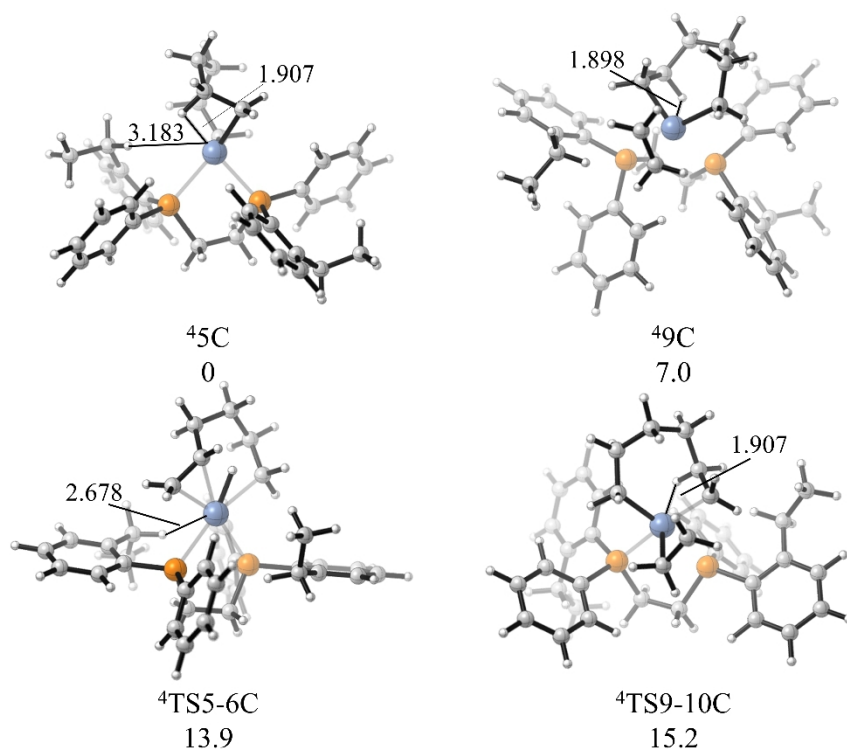

Fig. S19. Optimized geometries for the key intermediates and transition states of catalyst model C (Cr-PCCP<sup>Et</sup>). Energy barriers in kcal/mol. Bond distances are in Å.

## 12. List of Cartesian Coordinates

<sup>6</sup>A

Geometry with 59 atoms:  
 Total energy: -2810.724594940  
 Cr 0.012420 -0.263240 1.768742  
 P 1.701873 0.036309 -0.126439  
 P -1.661915 -0.041614 -0.142464  
 C -0.650569 0.426412 -1.637740  
 C 0.715380 -0.273303 -1.683353  
 H -1.224510 0.235758 -2.558315  
 H -0.525653 1.519303 -1.572204  
 H 0.598563 -1.366195 -1.768166  
 H 1.286890 0.073728 -2.558409  
 C 3.175774 -1.038424 -0.257112  
 C 3.624368 -1.598049 -1.465844  
 C 3.889421 -1.298744 0.926751  
 C 4.767469 -2.403237 -1.484783  
 H 3.093156 -1.410680 -2.401119  
 C 5.035816 -2.095004 0.901736  
 H 3.546455 -0.873244 1.874615  
 C 5.475122 -2.650525 -0.304733  
 H 5.107635 -2.836623 -2.428482  
 H 5.584482 -2.287531 1.826942  
 H 6.368728 -3.279106 -0.324345  
 C 2.310885 1.757034 -0.359059  
 C 3.528817 2.046305 -0.996462  
 C 1.504796 2.816765 0.094853  
 C 3.925122 3.373599 -1.182229  
 H 4.173829 1.236216 -1.344723  
 C 1.900016 4.142484 -0.101002  
 H 0.559185 2.610378 0.605136  
 C 3.112341 4.422213 -0.739203  
 H 4.875849 3.589374 -1.676065  
 H 1.263639 4.957648 0.252121  
 H 3.426725 5.458307 -0.886521  
 C -2.412579 -1.670849 -0.539609  
 C -3.173970 -2.287475 0.471431  
 C -2.242865 -2.332041 -1.766522  
 C -3.764707 -3.532532 0.253218  
 H -3.316533 -1.783541 1.432378  
 C -2.828473 -3.585342 -1.977952  
 H -1.657190 -1.879825 -2.569042  
 C -3.589892 -4.185976 -0.972410  
 H -4.361640 -3.996580 1.042174  
 H -2.689654 -4.091303 -2.936553  
 H -4.047389 -5.163741 -1.141690  
 C -3.049770 1.153534 -0.170934  
 C -4.070282 1.074573 -1.134140  
 C -3.072366 2.188140 0.778762  
 C -5.090767 2.027429 -1.150434  
 H -4.073549 0.262254 -1.865715  
 C -4.094320 3.141996 0.757356  
 H -2.293384 2.245174 1.545346  
 C -5.102574 3.062185 -0.207552  
 H -5.883112 1.961228 -1.900163  
 H -4.107210 3.943776 1.499753  
 H -5.904714 3.804241 -0.222038  
 C 0.708313 -0.797465 3.927243  
 C -0.662448 -0.767996 3.944918  
 H 1.254983 -1.736311 3.782002  
 H 1.301497 0.069745 4.239658  
 H -1.210587 0.123162 4.271627  
 H -1.252291 -1.682519 3.814317

<sup>6</sup>2A

Geometry with 65 atoms:  
 Total energy: -2889.321313180  
 Cr 0.009004 -0.215780 1.620061  
 P 1.699212 0.055824 -0.264569  
 P -1.673829 -0.031764 -0.285742  
 C -0.652796 0.416093 -1.782615  
 C 0.709454 -0.290584 -1.812111  
 H -1.225171 0.217823 -2.702520  
 H -0.523279 1.508993 -1.729322  
 H 0.583917 -1.384411 -1.864569  
 H 1.281702 0.025548 -2.698481  
 C 3.161296 -1.039755 -0.368103  
 C 3.541166 -1.728503 -1.532262  
 C 3.935951 -1.184639 0.797890  
 C 4.674956 -2.547775 -1.525593

H 2.964937 -1.630600 -2.454177  
 C 5.072762 -1.994859 0.797530  
 H 3.648926 -0.654575 1.711025  
 C 5.441927 -2.681071 -0.364746  
 H 4.961703 -3.080823 -2.435496  
 H 5.669059 -2.095492 1.707660  
 H 6.327765 -3.320852 -0.364574  
 C 2.346270 1.754359 -0.561915  
 C 3.572038 1.996199 -1.204246  
 C 1.562400 2.846608 -0.149468  
 C 3.997944 3.307702 -1.433016  
 H 4.200335 1.161246 -1.523112  
 C 1.985754 4.156380 -0.389055  
 H 0.612812 2.674070 0.364144  
 C 3.206752 4.388413 -1.029736  
 H 4.955064 3.485926 -1.929571  
 H 1.365099 4.996472 -0.067547  
 H 3.544483 5.411889 -1.209991  
 C -2.481414 -1.629512 -0.691859  
 C -3.305991 -2.202826 0.295369  
 C -2.281899 -2.319896 -1.897885  
 C -3.927628 -3.432029 0.074003  
 H -3.468839 -1.678518 1.241891  
 C -2.896617 -3.559202 -2.111419  
 H -1.649878 -1.901892 -2.683577  
 C -3.720376 -4.115753 -1.130235  
 H -4.573162 -3.861072 0.844312  
 H -2.732630 -4.087547 -3.053874  
 H -4.201479 -5.081757 -1.301575  
 C -3.023294 1.212308 -0.312140  
 C -4.222744 1.016529 -1.016545  
 C -2.824264 2.415689 0.387364  
 C -5.202124 2.013661 -1.022165  
 H -4.397636 0.083424 -1.557305  
 C -3.801375 3.414026 0.371415  
 H -1.899498 2.575019 0.950087  
 C -4.993352 3.212218 -0.331963  
 H -6.134039 1.852620 -1.569807  
 H -3.635938 4.346882 0.916050  
 H -5.762662 3.988310 -0.338362  
 C -0.419349 -2.541339 2.484462  
 C 0.857209 -2.230567 2.812926  
 H -1.246025 -2.389974 3.186567  
 H -0.665177 -3.051308 1.547112  
 H 1.696575 -2.488902 2.158387  
 H 1.112112 -1.826922 3.798744  
 C -0.846472 0.975731 3.577033  
 C 0.439192 1.393143 3.433951  
 H -1.682930 1.528433 3.136260  
 H -1.107314 0.153705 4.251835  
 H 1.259592 0.920789 3.984357  
 H 0.692474 2.296818 2.869452

<sup>4</sup>TS2-3A

Geometry with 65 atoms:  
 Total energy: -2889.281639100  
 Cr -0.000046 -0.000163 1.547121  
 P -1.535223 0.060268 -0.386233  
 P 1.535253 -0.060163 -0.386147  
 C 0.682812 0.343768 -1.996147  
 C -0.682677 -0.343283 -1.996272  
 H 0.570673 1.437684 -2.056736  
 H 1.307489 0.025835 -2.844772  
 H -1.307298 -0.025149 -2.844863  
 H -0.570535 -1.437184 -2.057111  
 C -2.026177 1.808381 -0.640750  
 C -1.479281 2.797119 0.193144  
 C -2.874754 2.188974 -1.694995  
 C -1.767914 4.147588 -0.023585  
 H -0.827371 2.507626 1.024491  
 C -3.167907 3.537874 -1.905851  
 H -3.314815 1.430534 -2.347657  
 C -2.613428 4.517541 -1.073252  
 H -1.336858 4.908934 0.630879  
 H -3.831871 3.827008 -2.724061  
 H -2.844302 5.572093 -1.242762  
 C -3.058013 -0.948612 -0.371086  
 C -4.300287 -0.401728 -0.008545  
 C -2.958302 -2.330684 -0.616682

C -5.427314 -1.223032 0.087029  
 H -4.394044 0.666574 0.196399  
 C -4.088630 -3.145135 -0.521594  
 H -1.998035 -2.782673 -0.880678  
 C -5.325290 -2.592997 -0.170786  
 H -6.390169 -0.787087 0.364322  
 H -4.002796 -4.215998 -0.721729  
 H -6.208652 -3.231873 -0.097046  
 C 3.058059 0.948688 -0.370675  
 C 2.958387 2.330818 -0.615960  
 C 4.300302 0.401700 -0.008184  
 C 4.088725 3.145227 -0.520619  
 H 1.998144 2.782890 -0.879908  
 C 5.427338 1.222961 0.087645  
 H 4.394027 -0.666651 0.196523  
 C 5.325354 2.592986 -0.169865  
 H 4.002922 4.216137 -0.720515  
 H 6.390168 0.786936 0.364896  
 H 6.208723 3.231830 -0.095927  
 C 2.026196 -1.808224 -0.641038  
 C 2.874835 -2.188584 -1.695318  
 C 1.479229 -2.797150 0.192587  
 C 3.167979 -3.537439 -1.906472  
 H 3.314950 -1.429998 -0.347773  
 C 1.767854 -4.147573 -0.224440  
 H 0.827268 -2.507844 1.023960  
 C 2.613430 -4.517293 -1.074139  
 H 3.831992 -3.826392 -2.724707  
 H 1.336743 -4.909065 0.629817  
 H 2.844298 -5.571809 -1.243883  
 C -1.830371 0.108382 2.533267  
 C -0.937058 0.298048 3.661518  
 H -2.434463 0.969090 2.222886  
 H -2.388677 -0.836383 2.494914  
 H -1.111240 -0.345755 4.529376  
 H -0.800920 1.343020 3.968152  
 C 1.830214 -0.108952 2.533359  
 C 0.936830 -0.298874 3.661509  
 H 2.434317 -0.969594 2.222814  
 H 2.388531 0.835816 2.495260  
 H 1.110958 0.344730 4.529525  
 H 0.800668 -1.343916 3.967895

<sup>4</sup>3A

Geometry with 65 atoms:  
 Total energy: -2889.288474050  
 Cr 0.104363 -0.120013 1.548277  
 P 1.639195 0.162768 -0.361073  
 P -1.711555 0.064813 -0.299095  
 C -0.753012 0.618309 -1.798313  
 C 0.617713 -0.064483 -1.905775  
 H -1.346596 0.461045 -2.712540  
 H -0.639417 1.708486 -1.686817  
 H 0.507272 -1.152507 -2.041796  
 H 1.173276 0.328640 -2.771347  
 C 3.052585 -0.976630 -0.531779  
 C 3.466956 -1.481819 -1.776655  
 C 3.754710 -1.339777 0.630903  
 C 4.567329 -2.340348 -1.851470  
 H 2.945133 -1.210287 -2.696247  
 C 4.856090 -2.193821 0.548450  
 H 3.435523 -0.953930 1.600953  
 C 5.262282 -2.696808 -0.691945  
 H 4.882636 -2.730819 -2.822058  
 H 5.395702 -2.471691 1.456971  
 H 6.120752 -3.369926 -0.754755  
 C 2.308677 1.865356 -0.481994  
 C 3.590506 2.132685 -0.989110  
 C 1.504392 2.932866 -0.042398  
 C 4.052888 3.449680 -1.061547  
 H 4.233391 1.314694 -1.320935  
 C 1.968053 4.247630 -0.122896  
 H 0.506904 2.745613 0.366203  
 C 3.244816 4.506856 -0.631720  
 H 5.053180 3.649311 -1.453355  
 H 1.335187 5.069755 0.219819  
 H 3.612691 5.534192 -0.687218  
 C -2.503156 -1.522086 -0.753845  
 C -3.284549 -2.157435 0.229402

C -2.338213 -2.139858 -2.003287  
C -3.903750 -3.377957 -0.040876  
H -3.416823 -1.691808 1.210659  
C -2.954221 -3.368253 -2.267178  
H -1.733953 -1.673558 -2.783650  
C -3.738130 -3.986856 -1.290577  
H -4.515359 -3.858003 0.726820  
H -2.821279 -3.839873 -3.243889  
H -4.220007 -4.944683 -1.500845  
C -3.075402 1.280591 -0.177165  
C -4.141344 1.288400 -1.093829  
C -3.031981 2.248887 0.839866  
C -5.139106 2.260269 -0.997279  
H -4.196674 0.528765 -1.878066  
C -4.032008 3.221584 0.932413  
H -2.219467 2.246455 1.572932  
C -5.084475 3.228124 0.012899  
H -5.965933 2.261842 -1.711755  
H -3.992103 3.969859 1.727783  
H -5.868823 3.985521 0.086232  
C 0.186190 -2.150580 1.762841  
C -0.021820 -2.150053 3.287337  
H -0.620292 -2.634448 1.191382  
H 1.162953 -2.536491 1.435915  
H 0.794803 -2.683511 3.802037  
H -0.965978 -2.642004 3.571422  
C -0.021873 -0.680998 3.781647  
C 1.199819 0.054141 3.252688  
H -0.960107 -0.183829 3.366154  
H -0.204660 -0.583964 4.865768  
H 2.135287 -0.509350 3.374572  
H 1.313658 1.087424 3.620673

<sup>4</sup>A

Geometry with 71 atoms:  
Total energy: -2967.891944300  
Cr 0.043880 -0.629295 1.340029  
P -1.741297 -0.013571 -0.430789  
P 1.505255 0.128793 -0.507628  
C 0.481748 0.528279 -2.023657  
C -0.847567 -0.235358 -2.048609  
H 0.298908 1.613492 -1.988361  
H 1.070658 0.326210 -2.930889  
H -1.484743 0.109577 -2.878153  
H -0.676344 -1.314320 -2.182423  
C -2.188752 1.766707 -0.441341  
C -1.388894 2.657646 0.296077  
C -3.258285 2.275376 -1.199458  
C -1.646868 4.031045 0.275774  
H -0.543090 2.287681 0.882386  
C -3.520540 3.647222 -1.210367  
H -3.892894 1.598934 -1.777287  
C -2.716767 4.526179 -0.474681  
H -1.011285 4.710814 0.848287  
H -4.356856 4.033542 -1.798050  
H -2.926190 5.598574 -0.486957  
C -3.310653 -0.938062 -0.583699  
C -4.412009 -0.558636 0.207802  
C -3.418376 -2.077269 -1.400542  
C -5.595573 -1.298014 0.174152  
H -4.352911 0.329118 0.841521  
C -4.606259 -2.814040 -1.429455  
H -2.584795 -2.402227 -2.025482  
C -5.695653 -2.428251 -0.644171  
H -6.445006 -0.986804 0.787068  
H -4.678602 -3.693274 -2.074140  
H -6.623117 -3.005127 -0.671317  
C 2.394217 1.681436 -0.118779  
C 3.021542 2.424191 -1.134927  
C 2.437541 2.148946 1.205128  
C 3.672511 3.620175 -0.827871  
H 3.006989 2.067722 -2.168073  
C 3.091387 3.347480 1.508471  
H 1.977325 1.569704 2.009820  
C 3.706718 4.083761 0.492836  
H 4.158692 4.192210 -1.621743  
H 3.124403 3.701244 2.541682  
H 4.219923 5.018948 0.729872  
C 2.779171 -1.056011 -1.067288  
C 2.447597 -2.071938 -1.980301  
C 4.069226 -1.019520 -0.512684

C 3.395424 -3.033910 -2.335380  
H 1.448075 -2.126228 -2.416968  
C 5.012476 -1.986349 -0.870081  
H 4.343026 -0.231988 0.192498  
C 4.678023 -2.994937 -1.778757  
H 3.129620 -3.818469 -3.047781  
H 6.015025 -1.948338 -0.437416  
H 5.417587 -3.749878 -2.055832  
C -0.018114 -2.605333 0.779210  
C 1.236412 -3.290712 1.315815  
H -0.929574 -2.910904 1.331986  
H -0.193374 -2.780907 -0.295832  
H 2.069483 -3.136469 0.610049  
H 1.097087 -4.386380 1.391487  
C 1.610913 -2.678679 2.672357  
C 1.695842 -1.150628 2.535352  
H 0.839203 -2.955560 3.415510  
H 2.555738 -3.114501 3.048991  
H 2.616364 -0.882535 1.986333  
H 1.758796 -0.642980 3.514542  
C -1.018084 -0.499916 3.694115  
C -2.041868 -0.339881 2.831596  
H -0.723878 -1.487164 4.059905  
H -0.494073 0.357726 4.127703  
H -2.395261 0.657062 2.547245  
H -2.626313 -1.189741 2.465564

<sup>4</sup>TS4-5A

Geometry with 71 atoms:  
Total energy: -2967.875960250  
Cr -0.121560 -0.684314 1.298105  
P -1.720681 0.084510 -0.452658  
P 1.523499 0.189673 -0.498546  
C 0.518844 0.679578 -2.000627  
C -0.820809 -0.064326 -2.074343  
H 0.352421 1.764301 -1.910418  
H 1.111227 0.519073 -2.913745  
H -1.448016 0.329615 -2.889409  
H -0.660110 -1.137499 -2.260226  
C -2.178948 1.858490 -0.380910  
C -1.358434 2.735134 0.349782  
C -3.282806 2.375242 -1.081672  
C -1.627973 4.106127 0.374044  
H -0.490123 2.355935 0.894677  
C -3.554995 3.744737 -1.048078  
H -3.936136 1.707805 -1.648796  
C -2.728666 4.611524 -0.323480  
H -0.976693 4.776801 0.939606  
H -4.416974 4.138105 -1.592472  
H -2.945130 5.682374 -0.302210  
C -3.282071 -0.846118 -0.626824  
C -4.327114 -0.575063 0.277238  
C -3.437284 -1.882917 -1.562115  
C -5.505891 -1.320885 0.237357  
H -4.223582 0.228590 1.010011  
C -4.619958 -2.628681 -1.595034  
H -2.645137 -2.121651 -2.273559  
C -5.654649 -2.350673 -0.698384  
H -6.311998 -1.096317 0.939968  
H -4.730852 -3.430394 -2.329230  
H -6.577610 -2.934705 -0.728024  
C 2.467182 1.698016 -0.063328  
C 3.268778 2.354281 -1.014667  
C 2.373430 2.222311 1.236176  
C 3.952806 3.520911 -0.669904  
H 3.363717 1.949182 -2.025473  
C 3.061589 3.390626 1.579896  
H 1.768240 1.716805 1.994626  
C 3.848720 4.041015 0.626193  
H 4.573609 4.025572 -1.414170  
H 2.984891 3.789100 2.594358  
H 4.387888 4.953351 0.892756  
C 2.775989 -0.999877 -1.102091  
C 2.481608 -1.897135 -2.142850  
C 4.002626 -1.113040 -0.423579  
C 3.400727 -2.887758 -2.499053  
H 1.533883 -1.838005 -2.682440  
C 4.917478 -2.104637 -0.784393  
H 4.249242 -0.421976 0.386278  
C 4.617864 -2.995891 -1.819880  
H 3.162800 -3.578409 -3.311671

H 5.869709 -2.180426 -0.253817  
H 5.333696 -3.772611 -2.098986  
C -0.116612 -2.610495 0.586440  
C 1.144726 -3.305575 1.087239  
H -1.033659 -3.029809 1.039932  
H -0.223189 -2.660959 -0.510491  
H 2.011416 -2.976557 0.491547  
H 1.080903 -4.401004 0.945637  
C 1.398985 -2.977206 2.562697  
C 1.306332 -1.479558 2.832620  
H 0.665196 -3.509630 3.195058  
H 2.390812 -3.355038 2.873526  
H 1.993003 -0.908248 2.173487  
H 1.595271 -1.216978 3.856375  
C -0.708973 -0.992327 3.586588  
C -1.731527 -0.617750 2.693438  
H -0.688287 -2.007441 3.989583  
H -0.301597 -0.233085 4.260374  
H -2.088073 0.419542 2.706998  
H -2.461411 -1.363096 2.362853

<sup>4</sup>5A

Geometry with 71 atoms:  
Total energy: -2967.916449150  
Cr -0.065208 -0.811324 1.083741  
C 0.073744 -2.583737 0.059921  
C 1.074234 -3.588694 0.630366  
H 1.128195 -4.446253 -0.067174  
H 2.094188 -3.160255 0.633227  
C 0.725898 -4.129766 2.026633  
H 1.232970 -5.096524 2.179719  
C 1.116135 -3.219711 3.200165  
C 0.616479 -1.770542 3.123051  
C -0.841177 -1.538343 2.808725  
H -1.319143 -0.762597 3.428221  
H -1.464209 -2.440183 2.763620  
H 0.956563 -1.202124 4.004664  
H 1.293560 -1.268691 2.316647  
H 0.733697 -3.654201 4.139197  
H 2.216126 -3.202325 3.922249  
H -0.354745 -4.353052 2.062918  
H 0.339058 -2.319777 -0.978511  
H -0.945671 -3.007063 0.049922  
P -1.759303 0.093501 -0.451672  
C -3.348990 -0.738942 -0.783437  
C -4.211271 -0.281173 -1.794945  
C -5.425934 -0.929585 -2.021901  
C -5.789377 -2.032607 -1.329557  
C -4.938696 -2.485312 -0.227485  
C -3.719654 -1.840766 0.003658  
H -3.056884 -2.190540 0.798212  
H -5.223549 -3.343147 0.386369  
H -6.741657 -2.537704 -1.419176  
H -6.094227 -0.571517 -2.808724  
H -3.941424 0.587522 -2.401173  
C -2.138330 1.825370 0.025347  
C -2.268010 2.870787 -0.904464  
C -2.518656 4.173956 -0.466566  
C -2.648172 4.445697 0.899298  
C -2.531957 3.409644 1.831340  
C -2.276116 2.106368 1.397635  
H -2.191541 1.299443 2.132152  
H -2.640585 3.615955 2.898872  
H -2.842264 5.466621 1.236883  
H -2.612996 4.981316 -1.196825  
H -2.169657 2.679973 -1.975284  
C -0.889167 0.207595 -2.091494  
C 0.443518 0.964186 -1.988260  
P 1.509701 0.431903 -0.541905  
C 2.800716 -0.690754 -1.185369  
C 2.665606 -1.365246 -2.408880  
C 3.615327 -2.316089 -2.797398  
C 4.705653 -2.600383 -1.971881  
C 4.844712 -1.934235 -0.748587  
C 3.894410 -0.992636 -0.351838  
H 4.007962 -0.484964 0.610141  
H 5.695038 -2.153082 -0.098158  
H 5.446646 -3.342129 -2.279053  
H 3.499327 -2.835527 -3.751640  
H 1.817969 -1.164926 -3.067382  
C 2.337949 1.981818 -0.028734

C 1.643358 2.811427 0.870664  
C 2.186664 4.037015 1.261529  
C 3.432052 4.438371 0.766775  
C 4.128250 3.615807 -0.125075  
C 3.584753 2.392575 -0.527660  
H 4.133999 1.759493 -1.228071  
H 5.099867 3.929566 -0.514552  
H 3.861452 5.394103 1.077085  
H 1.637358 4.677087 1.956173  
H 0.665315 2.509312 1.257772  
H 0.259531 2.034435 -1.812323  
H 1.015235 0.896229 -2.926703  
H -0.746263 -0.835954 -2.413930  
H -1.543896 0.679633 -2.840948

#### <sup>4</sup>TS5-6A

Geometry with 71 atoms:

Total energy: -2967.891857410  
Cr -0.016021 -0.057269 1.290493  
P -1.581017 0.425961 -0.596658  
P 1.584785 0.411283 -0.553085  
C 0.721910 0.654805 -2.199299  
C -0.690438 1.222273 -2.031610  
H 1.337229 1.289530 -2.855572  
H 0.684401 -0.341552 -2.664696  
H -0.666189 2.298263 -1.794279  
H -1.275458 1.104009 -2.956378  
C -3.012275 1.526511 -0.303672  
C -3.795248 2.010939 -1.368564  
C -3.317184 1.923306 1.009029  
C -4.865637 2.871843 -1.118134  
H -3.578061 1.713216 -2.397102  
C -4.390540 2.784447 1.255264  
H -2.716653 1.556878 1.844425  
C -5.165586 3.257898 0.193334  
H -5.469219 3.242313 -1.950275  
H -4.619689 3.085704 2.280203  
H -6.004539 3.931029 0.386112  
C -2.240740 -1.160431 -1.256630  
C -3.615173 -1.403662 -1.411161  
H -1.327437 -2.195854 -1.540088  
C -4.063868 -2.650020 -1.860843  
H -4.343758 -0.625606 -1.177685  
C -1.780740 -3.435213 -1.995740  
H -0.253318 -2.049901 -1.400552  
C -3.151186 -3.665080 -2.157895  
H -5.136167 -2.826141 -1.976271  
H -1.060183 -4.226319 -2.217178  
H -3.506319 -4.637044 -2.508627  
C 2.594452 1.923332 -0.316557  
C 3.803180 1.856682 0.399730  
C 2.132057 3.172678 -0.765756  
C 4.537915 3.017758 0.649496  
H 4.180355 0.895066 0.753530  
C 2.869656 4.331980 -0.508798  
H 1.195724 3.255515 -1.322199  
C 4.073057 4.257427 0.198148  
H 5.480604 2.952160 1.198189  
H 2.501829 5.296476 -0.867162  
H 4.649687 5.164289 0.395557  
C 2.767584 -0.942832 -0.906283  
C 3.849258 -0.756200 -1.784467  
C 2.540664 -2.214086 -0.353182  
C 4.685728 -1.828331 -2.102465  
H 4.044623 0.229234 -2.214331  
C 3.378097 -3.285910 -0.675941  
H 1.709483 -2.372536 0.339184  
C 4.451084 -3.093058 -1.550628  
H 5.526028 -1.675920 -2.784122  
H 3.194724 -4.270180 -0.238440  
H 5.108804 -3.928803 -1.801488  
C 1.748542 0.071035 2.455119  
C 0.746922 -0.491219 3.327157  
C 0.795064 -1.983170 3.678483  
C -0.588115 -2.612879 3.899198  
C -1.508425 -2.503149 2.672749  
C -1.843911 -1.054330 2.284151  
H 2.573458 -0.574036 2.130687  
H 2.040046 1.118423 2.597491  
H 0.423808 0.144428 4.167784  
H -0.539999 -0.490182 2.794174

H 1.315158 -2.525523 2.867874  
H 1.419847 -2.112361 4.578750  
H -1.078467 -2.125208 4.761941  
H -0.462194 -3.672292 4.175270  
H -1.036084 -3.021649 1.815984  
H -2.445154 -3.055543 2.867894  
H -2.543661 -1.029911 1.440016  
H -2.354716 -0.544963 3.120750

#### <sup>6</sup>A

Geometry with 71 atoms:

Total energy: -2967.966560500  
Cr -0.005632 -0.191213 1.534957  
P 1.681732 0.671243 -0.161942  
P -1.701627 0.431750 -0.277318  
C -0.675344 1.240156 -1.610031  
C 0.719348 0.616091 -1.764599  
H -1.221773 1.236321 -2.566463  
H -0.589916 2.295700 -1.303759  
H 0.652560 -0.445025 -2.054628  
H 1.282473 1.141388 -2.552060  
C 3.142499 -0.394112 -0.459470  
C 3.580794 -0.775836 -1.739095  
C 3.829949 -0.872811 0.670749  
C 4.683771 -1.623955 -1.880787  
H 3.070359 -0.418395 -2.635438  
C 4.937609 -1.710259 0.525281  
H 3.490779 -0.590940 1.671995  
C 5.363123 -2.091199 -0.752047  
H 5.014013 -1.918468 -2.880019  
H 5.465616 -2.072778 1.410647  
H 6.223909 -2.754332 -0.867117  
C 2.296488 2.400421 -0.108486  
C 3.469905 2.803367 -0.767901  
C 1.535430 3.354797 0.588820  
C 3.867068 4.142387 -0.735018  
H 4.079039 2.070702 -1.302898  
C 1.931242 4.695095 0.611716  
H 0.629750 3.051268 1.122313  
C 3.098167 5.089587 -0.049660  
H 4.782995 4.447876 -1.246973  
H 1.331405 5.430663 1.153285  
H 3.412968 6.135713 -0.026453  
C -2.477940 -1.043112 -1.045507  
C -3.378344 -1.776975 -0.249760  
C -2.157224 -1.518146 -2.326798  
C -3.948110 -2.957152 -0.727692  
H -3.640167 -1.417632 0.749938  
C -2.721178 -2.709665 -2.798217  
H -1.468882 -0.970086 -2.972818  
C -3.613726 -3.431171 -2.002177  
H -4.651777 -3.512233 -0.102459  
H -2.462034 -3.070861 -3.796495  
H -4.052569 -4.360232 -2.373713  
C -3.073227 1.619830 -0.017720  
C -4.129473 1.750694 -0.935492  
C -3.037620 2.446390 1.117351  
C -5.128131 2.702934 -0.720429  
H -4.176755 1.102779 -1.814532  
C -4.036295 3.401723 1.327058  
H -2.228927 2.338545 1.846689  
C -5.081743 3.530110 0.407838  
H -5.948627 2.799013 -1.435877  
H -4.002181 4.040623 2.213237  
H -5.866616 4.272320 0.573094  
C 0.735197 -1.443912 3.352209  
C -0.563829 -1.850953 3.193107  
C -1.028642 -3.137510 2.546174  
C -0.022243 -3.913422 1.688781  
C 0.290405 -3.277982 0.330670  
C 1.293183 -4.073193 -0.501676  
H 1.575763 -2.035005 2.975317  
H 0.984448 -0.626930 4.038884  
H -1.344623 -1.303779 3.739327  
H 2.265383 -4.155497 0.011766  
H -1.367607 -3.784354 3.378603  
H -1.941716 -2.940635 1.957516  
H -0.434811 -4.920871 1.510620  
H 0.913255 -4.073579 2.253232  
H -0.649648 -3.150560 -0.232489  
H 0.698454 -2.256626 0.475042

H 0.927863 -5.096093 -0.692210  
H 1.474537 -3.596712 -1.478336

#### <sup>4</sup>TS3-7A

Geometry with 65 atoms:

Total energy: -2889.263107110  
Cr 0.039812 -0.673826 1.424935  
P 1.668507 0.175882 -0.289661  
P -1.626191 0.037958 -0.276390  
C -0.663385 0.589137 -1.780964  
C 0.717901 -0.076011 -1.872597  
H -1.251401 0.411311 -2.694175  
H -0.557489 1.680614 -1.681323  
H 0.627975 -1.164856 -2.017375  
H 1.287495 0.335246 -2.720699  
C 3.251999 -0.710481 -0.477154  
C 3.598287 -1.434788 -1.629947  
C 4.136483 -0.690611 0.618063  
C 4.812810 -2.127120 -1.682697  
H 2.932508 -1.465419 -2.493909  
C 5.350316 -1.375839 0.555505  
H 3.877611 -0.130906 1.521365  
C 5.688592 -2.098636 -0.594487  
H 5.074890 -2.688811 -2.952600  
H 6.033013 -1.349975 1.408287  
H 6.636419 -2.640255 -0.640562  
C 2.061695 1.966294 -0.293289  
C 3.219741 2.476273 -0.904141  
C 1.143403 2.854344 0.296009  
C 3.448314 3.854257 -0.928538  
H 3.946606 1.797900 -1.357128  
C 1.372444 4.232245 0.261726  
H 0.235852 2.477381 0.776917  
C 2.525935 4.732879 -0.349734  
H 4.351798 4.243992 -1.403829  
H 0.649724 4.913890 0.716533  
H 2.709185 5.809863 -0.372370  
C -2.696450 -1.341535 -0.826866  
C -3.728667 -1.757142 0.032914  
C -2.460781 -2.048912 -2.015591  
C -4.522100 -2.854571 -0.302796  
H -3.913646 -1.219167 0.966655  
C -3.255707 -3.152459 -2.344280  
H -1.657227 -1.753262 -2.693287  
C -4.285809 -3.555832 -1.491282  
H -5.327266 -3.166208 0.366985  
H -3.066633 -3.697206 -3.272455  
H -4.905121 -4.417911 -1.750464  
C -2.753413 1.431740 0.081537  
C -3.677562 1.876412 -0.880608  
C -2.671591 2.089450 1.319474  
C -4.497254 2.972412 -0.607709  
H -3.763686 1.360418 -1.840630  
C -3.495034 3.187402 1.588955  
H -1.974396 1.737844 2.085537  
C -4.404731 3.630152 0.625059  
H -5.214259 3.314270 -1.358034  
H -3.428298 3.693214 -2.55108  
H -5.049189 4.487134 0.835600  
C 0.137066 -2.641726 0.789405  
C -0.116040 -3.243385 2.180252  
H -0.626743 -2.909453 0.047162  
H 1.141533 -2.853830 0.389136  
H 0.557382 -4.089635 2.410622  
H -1.149770 -3.605165 2.274201  
C 0.132796 -2.129776 3.196141  
C 1.317103 -1.402350 3.087310  
H -1.141316 -1.118277 2.505464  
H -0.464449 -2.096105 4.112367  
H 2.122138 -1.768272 2.441719  
H 1.598360 -0.675061 3.856478

#### <sup>4</sup>7A

Geometry with 65 atoms:

Total energy: -2889.271658410  
Cr 0.001132 -0.672784 1.437132  
P 1.616714 0.218628 -0.339001  
P -1.631862 0.002652 -0.260384  
C -0.731356 0.579612 -1.791456  
C 0.655782 -0.066521 -1.910494  
H -1.339514 0.392447 -2.689263



H -0.641551 1.672299 -1.690888  
H 0.569785 -1.156715 -2.044539  
H 1.212594 0.340197 -2.769398  
C 3.228858 -0.613477 -0.537539  
C 3.418052 -1.682492 -1.429742  
C 4.279305 -0.245126 0.325582  
C 4.640338 -2.362107 -1.462381  
H 2.622991 -1.995121 -2.108938  
C 5.497777 -0.924121 0.284534  
H 4.147415 0.584129 1.025855  
C 5.680459 -1.985659 -0.609010  
H 4.778060 -3.188882 -2.163384  
H 6.308098 -0.623426 0.953031  
H 6.633862 -2.518405 -0.639136  
C 1.941170 2.021566 -0.349504  
C 3.016987 2.592687 -1.051344  
C 1.034403 2.861057 0.321981  
C 3.179819 3.979683 -1.074083  
H 3.732888 1.955657 -1.575846  
C 1.195227 4.248746 0.288627  
H 0.185441 2.436519 0.865389  
C 2.270617 4.808713 -0.407094  
H 4.020828 4.416351 -1.618242  
H 0.480326 4.890502 0.809031  
H 2.402861 5.893114 -0.429162  
C -2.668452 -1.411970 -0.779475  
C -3.649356 -1.875502 0.114773  
C -2.458162 -2.090498 -1.989721  
C -4.418472 -2.993689 -0.208589  
H -3.809611 -1.360400 1.065195  
C -3.228820 -3.214536 -2.305649  
H -1.695689 -1.755873 -2.695827  
C -4.208594 -3.666513 -1.418266  
H -5.183587 -3.344384 0.488211  
H -3.060944 -3.736675 -3.250751  
H -4.809344 -4.544529 -1.667618  
C -2.786045 1.363350 0.135394  
C -3.724634 1.796684 -0.817702  
C -2.713971 2.006712 1.381114  
C -4.569024 2.869571 -0.528436  
H -3.803555 1.289776 -1.783161  
C -3.561879 3.081701 1.666027  
H -2.010328 1.656979 2.141236  
C -4.486187 3.514635 0.711512  
H -5.297888 3.202316 -1.271361  
H -3.503856 3.576227 2.638581  
H -5.150255 4.353067 0.935410  
C 0.171832 -2.623173 0.818245  
C 0.279135 -3.242413 2.217636  
H -0.694627 -2.979294 0.245831  
H 1.092766 -2.738851 0.221995  
H 0.980113 -4.098612 2.243145  
H -0.698603 -3.616425 2.550943  
C 0.762595 -2.184711 3.199308  
C 1.825446 -1.379224 2.951807  
H -1.357205 -0.905804 2.326137  
H 0.221242 -2.073482 4.145227  
H 2.472749 -1.537968 2.082545  
H 2.157507 -0.635038 3.683029

<sup>4</sup>T57-8A

Geometry with 65 atoms:  
Total energy: -2889.257890410  
Cr -0.062191 -0.317530 1.405696  
P 1.562769 0.043769 -0.458852  
P -1.610583 0.053533 -0.391073  
C -0.728939 0.505211 -1.975758  
C 0.631766 -0.192203 -2.060796  
H -1.356099 0.299324 -2.857080  
H -0.599520 1.598724 -1.925976  
H 0.520294 -1.278167 -2.205108  
H 1.231787 0.187514 -2.902195  
C 2.994808 -1.094017 -0.579056  
C 2.726880 -2.467927 -0.732242  
C 4.323267 -0.668172 -0.419102  
C 3.771697 -3.393411 -0.750511  
H 1.697208 -2.823813 -0.837112  
C 5.365822 -1.600682 -0.433083  
H 4.552524 0.390884 -0.285945  
C 5.094452 -2.960914 -0.601762  
H 3.552559 -4.456410 -0.877843

H 6.396488 -1.258099 -0.312635  
H 5.911896 -3.685893 -0.614205  
C 2.209947 1.754201 -0.580614  
C 2.964831 2.175357 -1.690827  
C 1.916996 2.676998 0.437728  
C 3.419147 3.492683 -1.773693  
H 3.207682 1.472109 -2.491411  
C 2.371665 3.996344 0.351746  
H 1.328593 2.367183 1.305721  
C 3.123797 4.404113 -0.752920  
H 4.006925 3.810109 -2.638424  
H 2.137020 4.705308 1.149219  
H 3.480968 5.434524 -0.821032  
C -2.497697 -1.519808 -0.729047  
C -3.357588 -2.012209 0.271447  
C -2.322788 -2.265080 -1.906555  
C -4.031397 -3.220514 0.092259  
H -3.506229 -1.441584 1.191638  
C -2.994026 -3.481104 -2.077555  
H -1.672589 -1.908831 -2.707142  
C -3.847641 -3.960795 -1.081472  
H -4.702951 -3.586895 0.872556  
H -2.851071 -4.050665 -2.999124  
H -4.372582 -4.909153 -1.219335  
C -2.909470 1.331681 -0.233537  
C -3.984778 1.382812 -1.136812  
C -2.803360 2.300526 0.775801  
C -4.938338 2.397279 -1.029474  
H -4.084253 0.623838 -1.917517  
C -3.757942 3.316517 0.877649  
H -1.977618 2.254461 1.491063  
C -4.824778 3.365121 -0.024582  
H -5.775780 2.431324 -1.730679  
H -3.671833 4.067359 1.666996  
H -5.573983 4.156503 0.057746  
C -0.741317 -1.552968 2.986502  
C 0.095244 -1.066616 4.167959  
H -1.755804 -1.883551 3.240498  
H -0.231577 -2.375649 2.437499  
H 0.691083 -1.870337 4.634307  
H -0.541145 -0.631710 4.951983  
C 0.979064 0.008628 3.569176  
C 2.068861 -0.236987 2.801290  
H -1.548965 -0.337916 1.985798  
H 0.666459 1.050364 3.725654  
H 2.467582 -1.250807 2.679045  
H 2.673622 0.576741 2.392240

<sup>6</sup>8A

Geometry with 65 atoms:  
Total energy: -2889.347183440  
Cr -0.003691 -0.482694 1.475087  
P 1.823122 0.146629 -0.205777  
P -1.547225 0.314938 -0.383853  
C 0.424414 0.985228 -1.716532  
C 0.910592 0.234942 -1.837042  
H -0.955553 1.004335 -2.681518  
H -0.248714 2.036845 -1.437082  
H 0.757732 -0.807476 -2.160393  
H 1.546334 0.728266 -2.588910  
C 3.260326 -0.940867 -0.521602  
C 3.740936 -1.238325 -1.808439  
C 3.906218 -1.496179 0.597792  
C 4.849250 -2.075883 -1.967905  
H 3.262989 -0.818995 -2.695829  
C 5.019054 -2.323370 0.434667  
H 3.535428 -1.278047 1.603782  
C 5.490388 -2.616587 -0.849518  
H 5.215032 -2.302783 -2.972372  
H 5.516477 -2.745336 1.311316  
H 6.357360 -3.269700 -0.978529  
C 2.502661 1.847500 -0.027714  
C 3.753488 2.219344 -0.547917  
C 1.717123 2.813570 0.626781  
C 4.202216 3.536961 -0.421976  
H 4.383849 1.480705 -1.048542  
C 2.164723 4.132208 0.742155  
H 0.747372 2.537236 1.051516  
C 3.409348 4.495077 0.218268  
H 5.178144 3.816254 -0.826718  
H 1.543167 4.875320 1.247744

H 3.764336 5.524109 0.313724  
C -2.440203 -1.106900 -1.130754  
C -3.442191 -1.717727 -0.351629  
C -2.130521 -1.650200 -2.387943  
C -4.119030 -2.843435 -0.821042  
H -3.705463 -1.801191 0.624848  
C -2.806132 -2.785223 -2.851730  
H -1.367175 -1.197883 -3.023348  
C -3.797663 -3.384348 -2.071827  
H -4.899507 -3.301793 -0.208728  
H -2.555796 -3.198433 -3.831925  
H -4.323046 -4.269874 -2.437407  
C -2.819433 1.618583 -0.184646  
C -3.839563 1.809113 -1.132504  
C -2.752238 2.460830 0.937357  
C -4.771225 2.834942 -0.959945  
H -3.913135 1.148148 -1.999951  
C -3.683470 3.489996 1.104286  
H -1.973491 2.307710 1.690689  
C -4.693038 3.677001 0.155546  
H -5.564664 2.976543 -1.697951  
H -3.625564 4.140538 1.980413  
H -5.425667 4.477016 0.287836  
C -1.123927 -3.766618 2.067667  
C -1.764429 -2.722785 2.980331  
H -1.865043 -4.521929 1.765975  
H -0.293412 -4.294735 2.562033  
H -2.152154 -3.217578 3.892492  
H -2.656896 -2.295897 2.492455  
C -0.873565 -1.592936 3.439954  
C 0.497763 -1.594429 3.452441  
H -0.730015 -3.312010 1.141030  
H -1.390752 -0.776306 3.962061  
H 1.077833 -2.456343 3.105490  
H 1.051836 -0.823075 3.998672

<sup>9</sup>9A

Geometry with 77 atoms:  
Total energy: -3046.512764200  
Cr -0.065967 -0.695250 1.052269  
P 1.730599 0.326419 -0.535891  
P -1.563454 0.346266 -0.611101  
C -0.550531 1.045331 -2.024181  
C 0.840537 0.416648 -2.170110  
H -1.120216 0.951381 -2.961275  
H -0.460053 2.122074 -1.814392  
H 0.773258 -0.618238 -2.539546  
H 1.439792 0.990622 -2.893654  
C 3.242023 -0.651951 -0.860711  
C 3.693200 -0.976126 -2.151405  
C 3.971841 -1.109254 0.252403  
C 4.849983 -1.743797 -2.320734  
H 3.155236 -0.631898 -3.036424  
C 5.132642 -1.864993 0.079565  
H 3.630713 -0.874026 1.263576  
C 5.571809 -2.186993 -1.209210  
H 5.190119 -1.991444 -3.329221  
H 5.692010 -2.209278 0.952803  
H 6.476528 -2.784080 -1.346439  
C 2.298619 2.050912 -0.251083  
C 3.618176 2.468465 -0.492467  
C 1.360417 2.986512 0.226344  
C 3.986645 3.798106 -0.265791  
H 4.361983 1.757092 -0.857850  
C 1.730456 4.316245 0.440541  
H 0.330862 2.682371 0.431255  
C 3.046171 4.723590 0.196772  
H 5.016122 4.112153 -0.455145  
H 0.990171 5.032826 0.804742  
H 3.338905 5.761950 0.370242  
C -2.700350 -0.878324 -1.363008  
C -3.985251 -1.060084 -0.823314  
C -2.268882 -1.713478 -2.407403  
C -4.824426 -2.057326 -1.326746  
H -4.337611 -0.418544 -0.012709  
C -3.113488 -2.706722 -2.909325  
H -1.269702 -1.602780 -2.832963  
C -4.391421 -2.882264 -2.369275  
H -5.822893 -2.187274 -0.902265  
H -2.769605 -3.347415 -3.724962  
H -5.049769 -3.661015 -2.761729

C -2.638270 1.751891 -0.132972  
C -3.428990 2.399247 -1.100558  
C -2.662286 2.209257 1.193808  
C -4.221254 3.490799 -0.743244  
H -3.433655 2.044325 -2.134373  
C -3.458826 3.303665 1.548332  
H -2.069678 1.706134 1.959137  
C -4.235889 3.945521 0.581178  
H -4.833447 3.987270 -1.500074  
H -3.474364 3.650333 2.584363  
H -4.859047 4.799409 0.858094  
C -1.689881 -1.366123 2.166881  
C -1.392157 -2.497328 3.162051  
C -1.053997 -3.847365 2.506809  
C 0.391004 -4.003935 2.013493  
C 0.927505 -2.873999 1.124919  
C 0.089396 -2.418490 -0.035958  
H -2.109686 -0.492429 2.698585  
H -2.473093 -1.702454 1.465415  
H -0.578538 -2.212885 3.859643  
H -2.277755 -2.649309 3.807900  
H -1.243907 -4.661670 3.225569  
H -1.756912 -4.017768 1.672595  
H 0.480780 -4.947367 1.448627  
H 1.062405 -4.102509 2.884858  
H 1.110610 -1.993914 1.849191  
H 1.967317 -3.077397 0.823416  
H -0.878558 -2.919114 -0.150425  
H 0.623786 -2.371086 -0.993766  
C 1.556952 0.314346 3.075657  
C 0.365030 0.930623 3.160064  
H 2.370741 0.731878 2.475663  
H 1.783021 -0.577640 3.668594  
H -0.419995 0.567437 3.827396  
H 0.181119 1.874371 2.638051

\*TS9-10A

Geometry with 77 atoms:

Total energy: -3046.497379890  
Cr -0.076188 -0.716797 1.142298  
P 1.768536 0.292844 -0.489471  
P -1.487854 0.479521 -0.559978  
C -0.449146 1.063265 -2.012371  
C 0.893286 0.327226 -2.133304  
H -1.032325 0.965800 -2.940626  
H -0.279189 2.138253 -1.845758  
H 0.740564 -0.720854 -2.437191  
H 1.529958 0.804792 -2.894714  
C 3.319173 -0.639866 -0.746430  
C 3.557666 -1.441314 -1.875408  
C 4.268470 -0.625891 0.295081  
C 4.724002 -2.210399 -1.959876  
H 2.846386 -1.469424 -2.703236  
C 5.432494 -1.389509 0.202908  
H 4.101442 -0.004042 1.179405  
C 5.661591 -2.186851 -0.924653  
H 4.901399 -2.825641 -2.845350  
H 6.164036 -1.363008 1.014302  
H 6.572136 -2.786518 -0.995351  
C 2.270333 2.043696 -0.250789  
C 3.487613 2.546877 -0.742748  
C 1.376610 2.918720 0.393491  
C 3.801044 3.899780 -0.589810  
H 4.195293 1.881917 -1.242937  
C 1.689551 4.273436 0.533502  
H 0.427942 2.549818 0.787404  
C 2.903655 4.765077 0.045661  
H 4.751379 4.280588 -0.972019  
H 0.982591 4.942095 1.030582  
H 3.152775 5.822690 0.162075  
C -2.710844 -0.681458 -1.276881  
C -4.047155 -0.680857 -0.845772  
C -2.276837 -1.678902 -2.168255  
C -4.932988 -1.659825 -1.304994  
H -4.401607 0.082613 -0.150323  
C -3.166293 -2.653730 -2.625537  
H -1.240456 -1.705114 -2.512339  
C -4.496373 -2.647858 -2.192100  
H -5.971165 -1.649104 -0.964673  
H -2.818766 -3.420666 -3.322001  
H -5.191530 -3.412234 -2.547299

C -2.430878 1.958153 -0.047323  
C -3.178034 2.696500 -0.983179  
C -2.387146 2.377964 1.291563  
C -3.864061 3.843403 -0.580935  
H -3.229979 2.372854 -2.025897  
C -3.077140 3.527619 1.689699  
H -1.814912 1.805968 2.024031  
C -3.813168 4.260458 0.754884  
H -4.442734 4.413613 -1.311693  
H -3.040126 3.848317 2.733479  
H -4.352733 5.158319 1.066240  
C 1.302022 -2.393248 1.721615  
C 0.541321 -2.999609 0.528080  
C -0.345986 -4.208941 0.844790  
C -1.436034 -3.977572 1.897335  
C -2.373001 -2.792428 1.611787  
C -1.828742 -1.425569 2.045713  
H 2.330315 -2.150598 1.436184  
H 1.313587 -3.118798 2.541183  
H -0.110389 -2.291934 -0.073372  
H 1.292511 -3.263784 -0.235049  
H -0.820007 -4.536911 -0.096667  
H 0.308753 -5.036665 1.167052  
H -0.976083 -3.844655 2.893525  
H -2.026058 -4.906443 1.966460  
H -2.638423 -2.785459 0.539294  
H -3.327747 -2.977668 2.139546  
H -2.609483 -0.656110 1.904011  
H -1.625502 -1.448351 3.132624  
C 0.534030 0.333652 2.827235  
C 1.109092 -0.297989 3.178910  
H -0.368931 0.642593 3.364423  
H 1.217691 1.148110 2.564107  
H 2.194778 -0.993141 3.288230  
H 0.564143 -1.546818 3.897618

\*10A

Geometry with 77 atoms:

Total energy: -3046.526642130  
Cr 0.208523 -0.727746 0.946585  
C -0.033485 -2.543784 0.027722  
C -1.355492 -3.304448 0.179355  
C -1.668886 -3.933023 1.548911  
C -2.307750 -2.996765 2.586562  
C -1.439026 -1.822265 3.036524  
C -0.167951 -2.198706 3.805812  
C 0.902517 -1.103269 3.809083  
C 1.600332 -0.960093 2.445574  
H 2.186865 -1.866617 2.209155  
H 2.310137 -0.112224 2.451867  
H 1.648258 -1.327498 4.595135  
H 0.442080 -0.142897 4.114531  
H 0.272923 -3.115944 3.381613  
H -0.470148 -2.452484 4.835703  
H -2.034615 -1.113598 3.636762  
H -1.242288 -1.213597 2.112795  
H -2.579166 -3.580889 3.483472  
H -3.255685 -2.606481 2.176380  
H -0.755834 -4.397771 1.959752  
H -2.375089 -4.764301 1.389072  
H -2.203399 -2.668332 -0.128697  
H -1.341432 -4.125269 -0.563170  
H 0.823547 -3.140844 0.389351  
H 0.145860 -2.322392 -1.041179  
P 1.846291 0.179336 -0.626681  
C 3.384097 -0.746564 -0.934578  
C 3.375453 -1.860508 -1.793581  
C 4.530860 -2.627251 -1.959527  
C 5.699018 -2.298563 -1.264525  
C 5.709032 -1.200135 -0.399570  
C 4.558145 -0.426817 -0.229691  
H 4.580168 0.428734 0.448745  
H 6.618471 -0.940695 0.147740  
H 6.601665 -2.899937 -1.396354  
H 4.516776 -3.486563 -2.634240  
H 2.470177 -2.142591 -2.335685  
C 2.283690 1.888949 -0.164330  
C 3.218585 2.649572 -0.886998  
C 3.445387 3.982904 -0.540023  
C 2.738248 4.566189 0.519050  
C 1.805791 3.815072 1.240566

C 1.585408 2.477887 0.901807  
H 0.863529 1.880463 1.468728  
H 1.252763 4.627253 2.066926  
H 2.918162 5.611182 0.782997  
H 4.176496 4.571994 -1.098942  
H 3.773774 2.199295 -1.713998  
C 0.981910 0.376852 -2.262673  
C -0.322123 1.170762 -2.092894  
P -1.419817 0.518309 -0.718240  
C -2.718380 -0.461240 -1.559613  
C -2.403929 -1.265084 -2.668774  
C -3.369099 -2.111100 -3.221350  
C -4.653084 -2.168323 -2.671119  
C -4.971956 -1.370305 -1.567570  
C -4.011627 -0.521912 -1.011397  
H -4.274368 0.098843 -0.151084  
H -5.976069 -1.405232 -1.137808  
H -5.405440 -2.832335 -3.103309  
H -3.114622 -2.729744 -4.085417  
H -1.403421 -1.247967 -3.106532  
C -2.273990 2.002686 -0.071732  
C -2.853407 2.952237 -0.932248  
C -3.478658 4.084485 -0.407742  
C -3.536843 4.277946 0.977915  
C -2.970033 3.335941 1.840306  
C -2.339425 2.202526 1.316871  
H -1.904879 1.468791 2.002138  
H -3.017922 3.482116 2.922054  
H -4.028594 5.164936 1.384730  
H -3.925929 4.818863 -1.082016  
H -2.820854 2.804618 -2.014590  
H -0.095105 2.213602 -1.823101  
H -0.887561 1.195127 -3.036600  
H 1.657732 0.882301 -2.970797  
H 0.791395 -0.633453 -2.657103

\*10A'

Geometry with 77 atoms:

Total energy: -3046.526036560  
Cr -0.056074 -0.585302 0.956814  
C -1.157159 -2.338005 0.799597  
C -0.498809 -2.664741 2.104335  
C -1.365269 -2.653701 3.376573  
C -2.372176 -1.497786 3.152327  
C -1.895526 -0.056604 3.269010  
C -0.795631 0.535339 4.162700  
C 0.642840 0.060074 3.910469  
C 1.137844 0.252266 2.470454  
H 2.193360 -0.057688 2.383649  
H 1.114518 1.325483 2.187825  
H 0.749864 -0.997193 4.206438  
H 1.302941 0.614982 4.604743  
H -1.067618 0.356719 5.217944  
H -0.815951 1.631903 4.029056  
H -2.786149 0.589411 3.345631  
H -1.616618 0.075479 2.193771  
H -2.804675 -1.545870 4.526213  
H -3.215359 -1.680091 2.824671  
H -0.697444 -2.677452 4.252540  
H -1.934834 -3.597663 3.406741  
H 0.098813 -3.590938 2.061050  
H 0.344231 -1.903203 2.296654  
H -0.821515 -2.934630 -0.061484  
H -2.249852 -2.251844 0.812487  
P 1.767065 -0.017850 -0.659690  
C 2.677597 -1.517734 -1.184687  
C 3.566403 -1.486509 -2.274935  
C 4.247953 -2.642827 -2.657324  
C 4.051026 -3.839357 -1.957130  
C 3.174172 -3.877311 -0.870023  
C 2.490373 -2.720424 -0.484242  
H 1.809053 -2.755451 0.369219  
H 3.020553 -4.808467 -0.319572  
H 4.586285 -4.742709 -2.259798  
H 4.938690 -2.610493 -3.503422  
H 3.740544 -0.554938 -2.819525  
C 3.023662 1.229227 -0.199361  
C 2.624052 2.569955 -0.046906  
C 3.535455 3.530764 0.394078  
C 4.850366 3.163818 0.700226  
C 5.249313 1.831642 0.563130

C 4.342309 0.864971 0.118122  
H 4.668779 -0.171969 0.016872  
H 6.274374 1.538758 0.802955  
H 5.562115 3.916109 1.048577  
H 3.215419 4.569967 0.502552  
H 1.597199 2.872830 -0.266045  
C 0.976279 0.629990 -2.222033  
C -0.393921 -0.020516 -2.445614  
P -1.447338 0.212185 -0.930790  
C -3.067265 -0.551420 -1.286279  
C -3.236894 -1.529523 -2.278668  
C -4.480199 -2.148000 -2.448586  
C -5.558181 -1.800083 -1.631054  
C -5.393823 -0.826845 -0.638397  
C -4.156007 -0.206691 -0.463900  
H -4.039054 0.555987 0.311180  
H -6.234621 -0.548156 0.001471  
H -6.527723 -2.285181 -1.767167  
H -4.603717 -2.904836 -3.227109  
H -2.408966 -1.819623 -2.928139  
C -1.769636 2.019526 -0.897729  
C -2.539798 2.634870 -1.900993  
C -2.741412 4.015958 -1.880983  
C -2.180789 4.794961 -0.861100  
C -1.419541 4.190171 0.142423  
C -1.215265 2.806340 0.125381  
H -0.620219 2.343082 0.915985  
H -0.985760 4.792673 0.944106  
H -2.344465 5.875268 -0.847410  
H -3.342257 4.487631 -2.662347  
H -2.993111 2.033029 -2.692999  
H -0.900670 4.009130 -3.323924  
H -0.287364 -1.104354 -2.614244  
H 0.873284 1.720411 -2.109755  
H 1.643750 0.455297 -3.079022

\*TS10-11A

Geometry with 77 atoms:

Total energy: -3046.511230440  
Cr -0.003817 -0.375595 1.109909  
P -1.848914 0.166412 -0.464635  
P 1.212559 0.766834 -0.763797  
C 0.136868 0.796666 -2.284295  
C -1.261357 1.258750 -1.863989  
H 0.574791 1.455923 -3.048876  
H 0.104473 -0.222674 -2.702312  
H -1.235212 2.299720 -1.507124  
H -1.975296 1.212664 -2.699792  
C -3.275052 1.031295 0.286556  
C -3.149803 2.390226 0.630666  
C -4.441770 0.336556 0.648985  
C -4.184041 3.044426 1.304153  
H -2.245861 2.952156 0.379992  
C -5.472018 0.996795 1.324312  
H -4.553717 -0.720849 0.400949  
C -5.347526 2.350205 1.651162  
H -4.079367 4.101924 1.558873  
H -6.377388 0.448037 1.959502  
H -6.155839 2.863762 2.177230  
C -2.500865 -1.281236 -1.384462  
C -3.607588 -1.154525 -2.243911  
C -1.831380 -2.512838 -1.306818  
C -4.035495 -2.245002 -3.003255  
H -4.142261 -0.203838 -2.315543  
C -2.256999 -3.601580 -2.074322  
H -0.974876 -2.630644 -0.638856  
C -3.360451 -3.468869 -2.920984  
H -4.899545 -2.139556 -3.663782  
H -1.727627 -4.554896 -2.005148  
H -3.697514 -4.319747 -3.518031  
C 1.537127 2.547018 -0.468473  
C 1.078627 3.150674 0.713842  
C 2.185248 3.336459 -1.436410  
C 1.260555 4.520986 0.926628  
H 0.582476 2.551420 1.480654  
C 2.369626 4.703003 -1.219304  
H 2.555569 2.882041 -2.358888  
C 1.906794 5.296976 -0.038790  
H 0.900817 4.979503 1.850845  
H 2.877159 5.308300 -1.974261  
H 2.053512 6.366901 0.128168

C 2.801042 0.003593 -1.256122  
C 4.035310 0.552288 -0.867573  
C 2.779269 -1.240094 -1.914864  
C 5.225287 -0.126651 -1.145804  
H 4.074186 1.510794 -0.346336  
C 3.971355 -1.911224 -2.193393  
H 1.831361 -1.697186 -2.211789  
C 5.197005 -1.356854 -1.808191  
H 6.179018 0.310705 -0.840856  
H 3.942948 -2.872897 -2.711360  
H 6.128778 -1.884919 -2.024469  
C 1.848987 0.025530 2.342864  
C 2.845260 -0.936461 3.004357  
H 2.388593 0.618483 1.592893  
H 1.439683 0.734310 3.086464  
C -1.578184 -1.302874 2.158690  
C 3.412951 -1.994949 2.048942  
H 3.683993 -0.353541 3.423606  
H 2.374969 -1.433633 3.871587  
C -0.362007 -1.858649 2.710269  
H -2.123214 -0.550570 2.743458  
H -2.235747 -1.964281 1.583308  
C 2.374043 -2.932012 1.414306  
H 3.973356 -1.492540 1.241920  
H 4.147880 -2.606828 2.600873  
C -0.009141 -3.304115 2.344305  
H 0.774331 -1.037579 2.410773  
H -0.162087 -1.622395 3.768005  
C 1.472293 -3.693355 2.414641  
H 2.907632 -3.644008 0.764900  
H 1.738018 -2.346675 0.719832  
H -0.594322 -3.960098 3.013056  
H -0.382114 -3.515816 1.326455  
H 1.542795 -4.777212 2.229556  
H 1.838770 -3.549552 3.445341

\*11A

Geometry with 77 atoms:

Total energy: -3046.581253960  
Cr -0.254736 0.184786 1.623538  
P 0.880278 1.657809 -0.136961  
P -1.910762 -0.269879 -0.282611  
C -1.362133 0.853176 -1.669632  
C 0.162201 1.024940 -1.744829  
H -1.769414 0.496505 -2.629443  
H -1.849180 1.821058 -1.466612  
H 0.659713 0.063855 -1.949968  
H 0.424130 1.715763 -2.561568  
C 2.690750 1.449004 -0.320350  
C 3.332256 1.248290 -1.554606  
C 3.460497 1.462139 0.857171  
C 4.717226 1.060287 -1.605193  
H 2.762188 1.237412 -2.485514  
C 4.844176 1.283943 0.802003  
H 2.971043 1.608509 1.824657  
C 5.474080 1.077877 -0.430219  
H 5.206223 0.900496 -2.569296  
H 5.431562 1.298198 1.723339  
H 6.555655 0.928706 -0.473908  
C 0.554182 3.461810 -0.223673  
C 1.440101 4.361240 -0.839682  
C -0.650526 3.942514 0.319016  
C 1.118265 5.718829 -0.916140  
H 2.384853 4.000472 -1.256519  
C -0.973353 5.299435 0.231035  
H -1.341235 3.254097 0.815069  
C -0.087842 6.188978 -0.385357  
H 1.814320 6.413815 -1.392352  
H -1.913666 5.663636 0.652132  
H -0.334898 7.251639 -0.447348  
C -1.737648 -1.986393 -0.912889  
C -2.164216 -3.024700 -0.062163  
C -1.121108 -2.315684 -2.130173  
C -1.980720 -4.359433 -0.423075  
H -2.647668 -2.786812 0.890026  
C -0.928072 -3.656406 -2.484231  
H -0.782649 -1.538022 -2.816936  
C -1.353718 -4.679196 -1.633575  
H -2.323371 -5.154058 2.442454  
H -0.443270 -3.898968 -3.433038  
H -1.200552 -5.724413 -1.912514

C -3.715195 0.029535 -0.171728  
C -4.620433 -0.508659 -1.102337  
C -4.194157 0.851244 0.862269  
C -5.982779 -0.218334 -1.000853  
H -4.263184 -1.162056 -1.902240  
C -5.557486 1.144502 0.957191  
H -3.498804 1.259088 1.602403  
C -6.452110 0.609503 0.025535  
H -6.682672 -0.641241 -1.725779  
H -5.922269 1.784172 1.764591  
H -7.519125 0.832757 0.102137  
C 0.912255 -0.346861 3.562759  
C 0.041401 -1.395152 3.417538  
C 0.370565 -2.774238 2.889498  
C 1.670754 -2.957716 2.095039  
C 1.658585 -2.337391 0.693607  
C 2.940102 -2.542167 -0.121564  
H 1.962040 -0.423342 3.261543  
H 0.643315 0.522439 4.173684  
H -0.944177 -1.312829 3.896451  
H 3.804917 -2.157005 0.449209  
H 0.397092 -3.434341 3.778332  
H -0.480407 -3.146499 2.292604  
H 1.850192 -4.040740 2.004284  
H 2.526347 -2.561715 2.670028  
H 0.797024 -2.732350 0.128446  
H 1.495495 -1.244713 0.780441  
H 2.883570 -1.914908 -1.029132  
C 3.207890 -3.990219 -0.543926  
H 3.326442 -4.627005 0.349803  
H 2.320772 -4.378062 -1.077393  
C 4.445319 -4.130840 -1.429557  
H 4.621158 -5.179523 -1.718660  
H 4.344031 -3.541822 -2.357232  
H 5.350747 -3.772763 -0.910770

\*1B

Geometry with 67 atoms:

Total energy: -3039.804529210  
Cr 0.007016 -0.072959 1.679833  
P -1.652999 0.198058 -0.223327  
P 1.665173 -0.132239 -0.229594  
O -0.107809 2.585865 0.410039  
O 0.119041 -2.533328 0.379915  
C 0.719736 0.361194 -1.761370  
C -0.698882 -0.222757 -1.773195  
H 0.686612 1.461294 -1.762101  
H 1.267549 0.034684 -2.658851  
H -1.247411 0.138893 -2.656575  
H -0.662963 -1.322491 -1.822392  
C -2.186048 1.936255 -0.503982  
C -3.428991 2.272735 -1.057231  
C -1.299378 2.974946 -0.131245  
C -3.792948 3.608656 -1.249520  
H -4.124413 1.478391 -1.338075  
C -1.659751 4.314196 -0.326061  
C -2.905061 4.621731 -0.884420  
H -4.765172 3.853667 -1.682217  
H -0.982663 5.120678 -0.045751  
H -3.177807 5.669816 -1.030608  
C -3.185764 -0.797157 -0.322744  
C -3.623210 -1.447043 -1.489004  
C -3.937403 -0.931942 0.859329  
C -4.789664 -2.219221 -1.468612  
H -3.064451 -1.357508 -2.422372  
C -5.107266 -1.693564 0.873122  
H -3.601738 -0.436548 1.775522  
C -5.533108 -2.342556 -0.291441  
H -5.120208 -2.723103 -2.380319  
H -5.684966 -1.786546 1.796046  
H -6.444710 -2.945003 -0.280333  
C 2.167904 -1.867098 -0.584086  
C 3.382757 -2.196683 -1.200386  
C 1.285555 -2.909441 -0.211889  
C 3.722053 -3.527964 -1.457447  
H 4.074797 -1.399460 -1.481911  
C 1.620840 -4.244074 -0.471329  
C 2.837457 -4.544228 -1.093184  
H 4.672130 -3.767046 -1.939865  
H 0.947029 -5.053184 -0.190983  
H 3.090432 -5.589076 -1.289388

C 3.210223 0.845296 -0.279603  
 C 3.666560 1.529431 -1.418806  
 C 3.950220 0.931689 0.914129  
 C 4.841121 2.286980 -1.360259  
 H 3.114698 1.479972 -2.359232  
 C 5.128206 1.678957 0.965641  
 H 3.598071 0.410636 1.809680  
 C 5.573460 2.361653 -0.172018  
 H 5.186495 2.818281 -2.250634  
 H 5.696940 1.734460 1.897125  
 H 6.491412 2.953082 -0.131168  
 C 0.873824 3.557350 0.749786  
 H 1.736990 3.000676 1.136940  
 H 1.191052 4.134187 -0.135248  
 H 0.507537 4.247799 1.528337  
 C -0.879680 -3.508120 0.681058  
 H -0.520748 -4.254958 1.408879  
 H -1.730013 -2.963038 1.110108  
 H -1.212387 -4.018165 -0.238195  
 C -0.691407 -0.322161 3.876797  
 C 0.681824 -0.364847 3.878110  
 H -1.233141 0.602915 4.104416  
 H -1.287837 -1.241299 3.847542  
 H 1.221745 -1.318035 3.847396  
 H 1.277203 0.526203 4.107603

<sup>12</sup>B

Geometry with 73 atoms:  
 Total energy: -3118.393763650  
 Cr -0.003093 -0.005030 1.563317  
 P -1.668670 0.127365 -0.336161  
 P 1.654829 -0.119353 -0.351555  
 O -0.281617 2.686180 -0.166625  
 O 0.274350 -2.681643 -0.225068  
 C 0.706620 0.271657 -1.917140  
 C -0.734419 -0.255071 -1.912565  
 H 0.708859 1.368143 -1.991827  
 H 1.249171 -0.130603 -2.786436  
 H -1.284871 0.155039 -2.773214  
 H -0.737824 -1.350678 -1.996046  
 C -2.413793 1.788177 -0.622244  
 C -3.768399 1.973818 -0.930753  
 C -1.588126 2.298911 -0.472446  
 C -4.302298 3.256019 -1.094809  
 H -4.419294 1.104138 -1.040720  
 C -2.120021 4.214214 -0.635126  
 C -3.475166 4.369544 -0.946844  
 H -5.360100 3.379598 -1.336464  
 H -1.489780 5.096082 -0.523000  
 H -3.880590 5.376514 -1.072682  
 C -3.098466 -1.020286 -0.367440  
 C -3.586609 -1.624023 -1.538950  
 C -3.711733 -1.321635 0.862209  
 C -4.661040 -2.516827 -1.476569  
 H -3.136432 -1.402903 -2.508730  
 C -4.792608 -2.204624 0.920426  
 H -3.337791 -0.862731 1.782386  
 C -5.265654 -2.808000 -0.249702  
 H -5.030286 -2.983854 -2.393000  
 H -5.262858 -2.426638 1.881590  
 H -6.106163 -3.504974 -0.205586  
 C 2.408786 -1.774803 -0.645690  
 C 3.768995 -1.954559 -0.932348  
 C 1.585695 -2.919412 -0.512309  
 C 4.310631 -3.234459 -1.089528  
 H 4.418301 -1.082237 -1.029587  
 C 2.125023 -4.202364 -0.668106  
 C 3.485939 -4.351695 -0.956975  
 H 5.372871 -3.353336 -1.313449  
 H 1.496466 -5.086860 -0.567789  
 H 3.897701 -5.356810 -1.076918  
 C 3.079801 1.034326 -0.385138  
 C 3.557626 1.646082 -1.556668  
 C 3.701416 1.330463 0.841627  
 C 4.629398 2.542218 -1.497189  
 H 3.101895 1.428112 -2.524550  
 C 4.779622 2.216996 0.896899  
 H 3.336436 0.864446 1.761697  
 C 5.241906 2.828770 -0.273179  
 H 4.990607 3.015137 -2.413813  
 H 5.256307 2.435102 1.855789

H 6.080374 3.528337 -0.231349  
 C 0.623434 3.767529 0.003412  
 H 1.599922 3.320732 0.227798  
 H 0.712200 4.367677 -0.918082  
 H 0.319712 4.422947 0.837322  
 C -0.629583 -3.766102 -0.070329  
 H -0.335559 -4.422887 0.765924  
 H -1.610033 -3.321902 0.142122  
 H -0.703629 -4.364442 -0.994284  
 C 0.654208 1.774436 3.172920  
 C -0.702360 1.792297 3.114532  
 H 1.185256 1.257695 3.978953  
 H 1.263842 2.376392 2.492119  
 H -1.235678 2.407240 2.382706  
 H -1.313474 1.293440 3.873813  
 C 0.784956 -1.876947 3.029622  
 C -0.568459 -1.882818 3.113096  
 H 1.316380 -2.453774 2.266302  
 H 1.401257 -1.390176 3.792361  
 H -1.090719 -1.399028 3.945065  
 H -1.184393 -2.469678 2.425106

<sup>4</sup>Ts2\_3B

Geometry with 73 atoms:  
 Total energy: -3118.363816240  
 Cr -0.000010 -0.000082 1.425369  
 P 1.522529 -0.122697 -0.530412  
 P -1.522532 0.122760 -0.530409  
 O 0.193465 -2.466274 0.748085  
 O -0.193415 2.466156 0.748367  
 C -0.698244 -0.309966 -2.148047  
 C 0.698252 0.310249 -2.147996  
 H -0.631788 -1.407289 -2.214767  
 H -1.310354 0.043400 -2.991982  
 H 1.310371 -0.042995 -2.991975  
 H 0.631788 1.407580 -2.214561  
 C 1.930105 -1.896898 -0.771998  
 C 2.931662 -2.298454 -1.670229  
 C 1.193044 -2.890231 -0.084715  
 C 3.223322 -3.647565 -1.875334  
 H 3.500168 -1.536786 -2.209353  
 C 1.489365 -4.246833 -0.283496  
 C 2.500820 -4.615437 -1.174109  
 H 4.009605 -3.939340 -2.574415  
 H 0.938053 -5.021772 0.247462  
 H 2.720428 -5.676135 -1.318613  
 C 3.108815 0.790117 -0.547887  
 C 3.126759 2.132288 -0.970244  
 C 4.282407 0.228944 -0.014101  
 C 4.298984 2.887406 -0.879182  
 H 2.226751 2.602341 -1.372517  
 C 5.451783 0.988419 0.074659  
 H 4.288299 -0.805590 0.334045  
 C 5.464686 2.317778 -0.358236  
 H 4.300378 3.925739 -1.220036  
 H 6.357754 0.536625 0.485983  
 H 6.381129 2.908789 -0.289504  
 C -1.930112 1.896997 -0.771737  
 C -2.931693 2.298690 -1.669881  
 C -1.193035 2.890231 -0.084326  
 C -3.223369 3.647832 -1.874764  
 H -3.500203 1.537107 -2.209119  
 C -1.489376 4.246861 -0.282878  
 C -2.500861 4.615599 -1.173402  
 H -4.009671 3.939710 -2.573780  
 H -0.938055 5.021719 0.248190  
 H -2.720483 5.676318 -1.317728  
 C -3.108813 -0.790663 -0.548003  
 C -3.126737 -2.132189 -0.970502  
 C -4.282416 -0.228960 -0.014168  
 C -4.298956 -2.887328 -0.879538  
 H -2.226721 -2.602193 -1.372814  
 C -5.451786 -0.988457 0.074495  
 H -4.288320 0.805535 0.334092  
 C -5.464671 -2.317769 -0.358546  
 H -4.300335 -3.925625 -1.220503  
 H -6.357766 -0.536717 0.485859  
 H -6.381109 -2.908795 -0.289891  
 C -0.588950 -3.422932 1.459009  
 H -1.348592 -2.854194 2.008014  
 H -1.096817 -4.117322 0.770969

H 0.029359 -3.991826 2.172813  
 C 0.589056 3.422715 1.459364  
 H -0.029193 3.991494 2.173311  
 H 1.348756 2.853902 2.008210  
 H 1.096850 4.172115 0.771381  
 C -1.840158 -0.003452 2.410761  
 C -0.970236 -0.209879 3.548365  
 H -2.361261 0.961011 2.348291  
 H -2.466709 -0.847967 2.104741  
 H -0.912404 -1.247662 3.898316  
 H -1.086940 0.482829 4.387544  
 C 1.840125 0.003181 2.410788  
 C 0.970188 0.209511 3.548398  
 H 2.361215 -0.961283 2.348230  
 H 2.466690 0.847718 2.104856  
 H 0.912355 1.247265 3.898439  
 H 1.086877 -0.483271 4.387518

<sup>4</sup>3B

Geometry with 73 atoms:  
 Total energy: -3118.393054210  
 Cr -0.024917 -0.109038 1.240661  
 C 1.407709 -0.295676 2.742944  
 C 0.675542 -0.178339 4.086864  
 C -0.686906 -0.870429 3.971283  
 C -1.427877 -0.291885 2.760906  
 H -1.734773 0.753493 2.959352  
 H -2.344925 -0.852866 2.507090  
 H -1.267596 -0.778480 4.910016  
 H -0.522257 -1.955262 3.824207  
 H 1.266559 -0.587799 4.929110  
 H 0.507407 0.888809 4.329193  
 H 1.782003 -1.327819 2.598596  
 H 2.286592 0.370676 2.676631  
 P 1.586009 0.016211 -0.709664  
 C 3.191073 0.879960 -0.785169  
 C 3.508426 1.823646 -1.776312  
 C 4.736647 2.493021 -1.739412  
 C 5.654824 2.226692 -0.720904  
 C 5.344487 1.285583 0.268133  
 C 4.119269 0.619266 0.241499  
 H 3.884567 -0.113995 1.016635  
 H 6.059706 1.071119 1.065892  
 H 6.613590 2.750251 -0.697458  
 H 4.976092 3.222406 -2.517085  
 H 2.813239 2.044024 -2.588224  
 C 1.992483 -1.771716 -0.798012  
 C 3.072927 -2.257718 -1.550952  
 C 3.394666 -3.615229 -1.556499  
 C 2.635712 -4.502395 -0.790079  
 C 1.556447 -4.045979 -0.028232  
 C 1.233306 -2.685102 -0.035379  
 O 0.158364 -2.193286 0.698176  
 C -0.868909 -3.120485 1.107733  
 H -1.721633 -2.517493 1.429663  
 H -0.517345 -3.740087 1.944543  
 H -1.162117 -3.751009 2.055532  
 H 0.989445 -4.755086 0.573516  
 H 2.884355 -5.566079 -0.773228  
 H 4.238597 -3.976625 -2.147630  
 H 3.676923 -1.554162 -2.129476  
 C 0.697445 0.412231 -2.299205  
 C -0.703442 -0.210545 -2.319383  
 P -1.594448 0.096980 -0.713774  
 C -3.239173 -0.674676 -0.869894  
 C -3.567603 -1.578163 -1.894358  
 C -4.820462 -2.201399 -1.903744  
 C -5.750986 -1.929707 -0.897775  
 C -5.428563 -1.030028 0.125423  
 C -4.179358 -0.409601 0.144624  
 H -3.931931 0.287496 0.949221  
 H -6.152702 -0.813168 0.914401  
 H -6.728667 -2.417355 -0.910019  
 H -5.069151 -2.899374 -2.706923  
 H -2.860281 -1.803819 -2.694550  
 C -1.890593 1.901271 -0.645681  
 C -2.815718 2.533491 -1.491451  
 C -3.056761 3.903778 -1.400355  
 C -2.371178 4.652982 -0.441530  
 C -1.446254 4.049838 0.414954  
 C -1.199176 2.675176 0.311851

O -0.273547 2.039623 1.131760  
C 0.563397 2.857978 1.975698  
H 1.306836 2.190303 2.416041  
H 1.072872 3.621903 1.370162  
H -0.036481 3.325713 2.769832  
H -0.937684 4.660852 1.158216  
H -2.556943 5.725508 -0.347314  
H -3.779848 4.381294 -2.064602  
H -3.362387 1.932235 -2.222792  
H -0.633344 -1.305543 -2.426697  
H -1.289493 0.170974 -3.170273  
H 1.287145 0.081088 -3.168295  
H 0.621302 1.511186 -2.342564

<sup>4</sup>B

Geometry with 79 atoms:

Total energy: -3196.971720560  
Cr -0.354897 -0.477958 1.232502  
P -1.818739 -0.046036 -0.646281  
P 1.409285 0.068506 -0.678891  
O -0.996695 1.765765 1.535443  
O 3.611693 -0.983376 0.877696  
C 0.416322 0.420951 -2.221829  
C -0.918798 -0.330928 -2.243199  
H 1.014325 0.211770 -3.121885  
H 0.239378 1.507502 -2.206579  
H -0.766158 -1.417459 -2.331919  
H -1.547648 -0.012504 -3.089394  
C -2.047645 1.768278 -0.611841  
C -2.628505 2.473307 -1.678250  
C -2.725931 3.863945 -1.645840  
C -2.235363 4.562301 -0.537517  
C -1.657690 3.882117 0.536545  
C -1.567633 2.485328 0.499026  
H -1.276703 4.441599 1.391045  
H -2.300038 5.652420 -0.504987  
H -3.181656 4.401838 -2.479615  
H -3.013975 1.922058 -2.539834  
C -3.472464 -0.780850 -0.831698  
C -4.562775 -0.210159 -0.152569  
C -5.816024 -0.823394 -0.199156  
C -5.991627 -2.010622 -0.917668  
C -4.909554 -2.583767 -1.592412  
C -3.652075 -1.976231 -1.549211  
H -2.816869 -2.446229 -2.072848  
H -5.042198 -3.511521 -2.154080  
H -6.973051 -2.489631 -0.951376  
H -6.659258 -0.371833 0.328977  
H -4.434266 0.717158 0.410169  
C 2.442125 -1.381831 -1.119977  
C 2.219929 -2.168301 -2.258710  
C 2.990185 -3.307367 -2.513669  
C 4.001823 -3.666635 -1.623261  
C 4.246894 -2.901237 -0.478655  
C 3.462586 -1.770556 -0.218227  
H 5.041518 -3.195653 0.206455  
H 4.613066 -4.552033 -1.814135  
H 2.799620 -3.905327 -3.407182  
H 1.439008 -1.898622 -2.971017  
C 2.558130 1.498569 -0.621429  
C 3.773679 1.520859 -1.323195  
C 4.591090 2.652685 -1.272287  
C 4.202764 3.770127 -0.524778  
C 2.993818 3.752930 0.177366  
C 2.176303 2.619830 0.134331  
H 1.238463 2.605337 0.694402  
H 2.687950 4.622771 0.764282  
H 4.844932 4.653657 -0.488521  
H 5.536226 2.663156 -1.821060  
H 4.085025 0.651628 -1.907677  
C -0.238062 -2.505872 0.767634  
C -1.042602 -3.262821 1.831965  
C -2.322890 -2.478490 2.143212  
C -1.953183 -1.023220 2.449516  
H -1.547319 -0.931389 3.477688  
H -2.819944 -0.340769 2.386022  
H -2.982887 -2.511307 1.258953  
H -2.894371 -2.953865 2.963858  
H -0.443694 -3.357424 2.756559  
H -1.272154 -4.300218 1.519751  
H 0.807205 -2.849669 0.686457

H -0.691995 -2.657164 -0.230179  
C 1.374537 -1.171499 3.113879  
C 1.549720 0.149455 2.931986  
H 1.047475 0.881322 3.569812  
H 2.270918 0.531625 2.206182  
H 0.711815 -1.561665 3.890498  
H 1.936271 -1.898768 2.524673  
C -1.171064 2.286199 2.866363  
H -0.400023 3.037449 3.096566  
H -1.085600 1.440411 3.557353  
H -2.172263 2.728602 2.974500  
C 4.709382 -1.183247 1.755143  
H 4.660624 -2.166230 2.254271  
H 4.645135 -0.394506 2.516016  
H 5.670072 -1.090803 1.220698

<sup>4</sup>TS4-5B

Geometry with 79 atoms:

Total energy: -3196.956552950  
Cr -0.506886 -0.573579 1.362666  
P -1.727180 -0.084118 -0.756132  
P 1.429886 -0.289513 -0.274833  
C 0.755662 0.046948 -1.990942  
C -0.637331 -0.562677 -2.178487  
H 0.712726 1.135669 -2.134467  
H 1.466828 -0.340835 -2.731768  
H -1.086087 -0.241176 -3.131490  
H -0.588686 -1.663912 -2.185627  
C -1.783888 1.743816 -0.834267  
C -2.343382 2.412559 -1.934534  
C -1.242417 2.500069 0.226594  
C -2.362827 3.805238 -1.998180  
H -2.779002 1.825227 -2.747026  
C -1.262909 3.901241 0.168011  
C -1.819423 4.541335 -0.942090  
H -2.801022 4.311963 -2.860321  
H -0.845081 4.504225 0.971812  
H -1.827146 5.633524 -0.974003  
C -3.415412 -0.635762 -1.164255  
C -3.651575 -1.702790 -2.046832  
C -4.496636 -0.057456 -0.473669  
C -4.952471 -2.178121 -2.238286  
H -2.827674 -2.175476 -2.585286  
C -5.792593 -0.535880 -0.670456  
H -4.326023 0.772119 0.217746  
C -6.022904 -1.598528 -1.551673  
H -5.128061 -3.006883 -2.928472  
H -6.626600 -0.078491 -0.132675  
H -7.037769 -1.974250 -1.702377  
C 2.624081 -1.655159 -0.502824  
C 2.477695 -2.856440 0.204044  
C 3.724133 -1.507126 -1.388413  
C 3.395476 -3.899773 0.054041  
H 1.632245 -2.974663 0.880048  
C 4.648523 -2.551641 -1.533168  
C 4.477235 -3.738136 -0.812811  
C 3.264420 -4.828854 0.612282  
H 5.498170 -2.449795 -2.208305  
H 5.204609 -4.544355 -0.937582  
C 2.457903 1.169375 0.169267  
C 2.118101 2.470200 -0.234828  
C 3.552731 0.989777 1.033372  
C 2.864152 3.567359 0.207076  
H 1.269104 2.649130 -0.896357  
C 4.294429 2.088149 1.474458  
H 3.835849 -0.014560 1.357680  
C 3.953121 3.381180 1.063510  
H 2.590342 4.572402 -0.124279  
H 5.146626 1.931367 2.140445  
H 4.536523 4.239101 1.406550  
O -0.695598 1.814419 1.294332  
O 3.801873 -0.332819 -2.051856  
C -0.214780 2.582514 2.407059  
H -1.025246 3.192282 2.835166  
H 0.130411 1.870886 3.160618  
H 0.630424 3.218102 2.104987  
C 4.930537 -0.039178 -2.860077  
H 4.785681 0.985851 -3.226271  
H 5.866266 -0.083945 -2.769996  
H 5.002754 -0.723657 -3.722887  
C -0.940817 -2.588072 1.146476

C -2.404592 -2.824516 1.524629  
H -0.705874 -2.967406 0.136243  
H -0.272946 -3.108006 1.858398  
H -2.635477 -3.903157 1.613181  
H -3.067454 -2.445149 0.729871  
C -2.736297 -2.105732 2.836538  
C -2.183742 -0.686642 2.845277  
H -3.828613 -2.089984 3.009621  
H -2.308864 -2.665591 3.688024  
H -2.443649 -0.134169 3.755367  
H -2.599975 -0.086544 2.010294  
C -0.186216 -0.749010 3.711905  
C 0.971514 -0.699033 2.906607  
H -0.427091 0.115930 4.334521  
H -0.484764 -1.701286 4.156037  
H 1.529640 -1.621235 2.721679  
H 1.574478 0.214913 2.891116

<sup>4</sup>B

Geometry with 79 atoms:

Total energy: -3196.999213950  
Cr -0.418902 -0.758669 1.117685  
P 1.336886 -0.088887 -0.501959  
P -1.893636 0.051458 -0.782007  
O 3.633519 0.297205 -2.320798  
O -0.805937 1.492444 1.585184  
C -0.831486 -0.010165 -2.309451  
C 0.532009 0.630463 -2.027650  
H -0.714099 -1.072756 -2.578153  
H -1.336413 0.494390 -3.148450  
H 1.219947 0.503378 -2.874504  
H 0.415764 1.712046 -1.871207  
C 2.491882 -1.361822 -1.107582  
C 2.342892 -2.699787 -0.717030  
C 3.234776 -3.680355 -1.159171  
C 4.291348 -3.315705 -1.995747  
C 4.462306 -1.988396 -2.402254  
C 3.561880 -1.005096 -1.968715  
H 5.292198 -1.728094 -3.058929  
H 4.999674 -4.071738 -2.343974  
H 3.107144 -4.718371 -0.845834  
H 1.520143 -2.969144 -0.054942  
C 2.373335 1.233547 0.233823  
C 2.002123 2.586296 0.182380  
C 2.752973 3.550388 0.862345  
C 3.878120 3.175210 1.602243  
C 4.251697 1.828153 1.657848  
C 3.504123 0.862041 0.981387  
H 3.804483 -0.186889 1.033670  
H 5.131087 1.525931 2.231917  
H 4.464618 3.930266 1.213161  
H 2.455350 4.600712 0.807922  
H 1.126822 2.909814 -0.383233  
C -2.026989 1.847177 -0.448247  
C -2.659058 2.723043 -1.345486  
C -2.684474 4.097828 -1.114002  
C -2.061650 4.606931 0.028657  
H -1.429628 3.757818 0.940487  
C -1.417181 2.374779 0.710279  
H -0.945486 4.186061 1.816054  
H -2.063904 5.682406 0.221492  
H -3.181137 4.766760 -1.819671  
H -3.141693 2.312257 -2.236457  
C -3.556717 -0.506517 -1.282087  
C -4.672905 -0.107548 -0.523471  
C -5.944888 -0.589246 -0.836665  
C -6.117630 -1.479741 -1.902380  
C -5.012306 -1.885755 -2.654620  
C -3.735486 -1.405222 -2.347946  
H -2.886103 -1.736393 -2.948993  
H -5.140983 -2.580139 -3.488490  
H -7.114132 -1.856001 -2.145703  
H -6.806289 -0.266681 -0.246626  
H -4.550644 0.591551 0.308210  
C -0.355675 2.004975 2.853549  
H 0.521084 2.655444 2.717401  
H -1.170493 2.548444 3.355275  
H -0.073851 1.140075 3.459970  
C 0.980053 -1.135762 2.600321  
C 0.447207 -1.661865 3.943095  
C -0.203739 -3.053999 3.883760

C -1.647095 -3.085524 3.360573  
C -1.889966 -2.375927 2.021717  
C -0.954110 -2.700100 0.881665  
H -1.454899 -2.955577 -0.062294  
H -0.184982 -3.442211 1.127751  
H -2.949249 -2.455666 1.727909  
H -1.845628 -1.248299 2.278603  
H -2.316079 -2.639416 4.117608  
H -1.968340 -4.134763 3.245415  
H 0.434528 -3.717248 3.273874  
H -0.211368 -3.498030 4.893014  
H 1.281297 -1.710420 4.669066  
H -0.274975 -0.948506 4.389503  
H 1.534737 -0.191649 2.754397  
H 1.715725 -1.854954 2.196093  
C 4.755392 0.783061 -3.042198  
H 4.809751 0.345582 -4.054024  
H 5.697336 0.581977 -2.503805  
H 4.616514 1.868958 -3.127830

<sup>4</sup>T5-6B

Geometry with 79 atoms:

Total energy: -3196.974282870  
Cr 0.027293 -0.044801 1.210840  
P -1.428973 0.309671 -0.800375  
P 1.657058 0.000604 -0.635624  
O -0.103361 2.509331 0.673741  
O 0.191757 -2.508496 -0.070715  
C 0.910800 0.643105 -2.222802  
C -0.484624 0.034975 -2.384974  
H 0.840908 1.739323 -2.149570  
H 1.565375 0.402426 -3.074286  
H -1.030394 0.480149 -3.230861  
H -0.413411 -1.049140 -2.562143  
C -1.839517 2.097309 -0.890770  
C -2.839013 2.586285 -1.746389  
C -1.105625 3.017073 -0.104695  
C -3.132244 3.949397 -1.811900  
H -3.405144 1.884161 -2.363219  
C -1.404935 4.385614 -0.160568  
C -2.415400 4.841508 -1.011195  
H -3.916368 4.310735 -2.480296  
H -0.854989 5.101259 0.449270  
H -2.638005 5.910806 -1.046010  
C -3.008143 -0.597019 -0.995336  
C -3.016645 -1.859435 -1.617803  
C -4.197920 -0.119536 -0.413880  
C -4.188670 -2.618500 -1.665329  
H -2.109423 -2.263658 -2.070850  
C -5.365676 -0.885255 -0.459931  
H -4.221982 0.860346 0.067060  
C -5.365372 -2.135644 -1.085022  
H -4.180925 -3.592377 -2.161175  
H -6.281560 -0.498164 -0.006866  
H -6.280888 -2.730846 -1.122913  
C 2.167471 -1.698737 -1.104171  
C 3.332291 -1.943325 -1.847723  
C 1.344117 -2.793006 -0.745902  
C 3.700207 -3.240027 -2.211386  
H 3.968284 -1.103801 -2.137930  
C 1.718041 -4.097366 -1.101195  
C 2.891463 -4.311972 -1.828911  
H 4.612795 -3.410362 -2.786205  
H 1.100276 -4.949472 -0.820408  
H 3.169038 -5.333523 -2.100062  
C 3.192611 0.967625 -0.391350  
C 3.218535 2.338801 -0.703906  
C 4.309955 0.393467 0.242854  
C 4.343250 3.112530 -0.402973  
H 2.362203 2.818358 -1.181984  
C 5.431660 1.170820 0.540148  
H 4.307828 -0.666778 0.503362  
C 5.452380 2.531707 0.218344  
H 4.351298 4.175102 -0.658451  
H 6.294014 0.708623 1.026821  
H 6.331500 3.137370 0.451316  
C 0.611542 3.361953 1.564074  
H 1.346499 2.726454 2.074650  
H 1.148779 4.154871 1.019467  
H -0.063840 3.812522 2.310064  
C -0.669656 -3.568250 0.330358

H -0.166765 -4.247732 1.038059  
H -1.527893 -3.098021 0.823949  
H -1.032597 -4.143464 -0.536853  
C 1.720363 -0.736247 2.280545  
C 0.666948 -0.586863 3.259142  
C -0.076999 -1.810308 3.807324  
C -1.510639 -1.490333 4.262773  
C -2.421941 -0.971449 3.134473  
C -1.894937 0.298412 2.449031  
H 1.998495 -1.750439 1.968153  
H 2.567392 -0.044613 2.334237  
H 0.833482 0.191379 4.021760  
H -0.463224 0.031032 2.781968  
H -0.104977 -2.592137 3.027432  
H 0.501076 -2.235191 4.646165  
H -1.469112 -0.733808 5.068315  
H -1.959352 -2.391720 4.712410  
H -2.548834 -1.768392 2.378545  
H -3.432622 -0.791946 3.544151  
H -2.565469 0.622256 1.645521  
H -1.857004 1.138468 3.167283

<sup>6</sup>B

Geometry with 79 atoms:

Total energy: -3197.040136790  
Cr -0.020085 -0.308864 -1.209492  
P -0.835691 1.118975 0.723687  
P 2.119322 -0.362580 0.142763  
O -0.782189 -1.779477 1.007709  
O 1.617003 2.160955 -1.231311  
C 1.609765 0.207722 1.845857  
C 0.660931 1.423433 1.797659  
H 1.120820 -0.643156 2.327952  
H 2.506069 0.473300 2.432309  
H 0.342483 1.692932 2.816731  
H 1.171670 2.295836 1.360276  
C -1.965476 0.116954 1.777020  
C -3.004687 0.675025 2.534302  
C -1.802791 -1.289509 1.776676  
C -3.864072 -0.133557 3.284135  
H -3.148745 1.757925 2.532891  
C -2.659001 -2.102327 2.528490  
C -3.685492 -1.517547 3.278354  
H -4.668363 0.318475 3.868350  
H -2.538410 -3.185163 2.535255  
H -4.350699 -2.159732 3.860760  
C -1.651391 2.749511 0.566431  
C -1.350525 3.854245 1.380331  
C -2.608516 2.893595 -0.455119  
C -1.992201 5.079489 1.170067  
H -0.618129 3.772724 2.185708  
C -3.256418 4.114012 -0.654236  
H -2.847309 2.043356 -1.100834  
C -2.944946 5.211707 0.156062  
H -1.747650 5.933463 1.806677  
H -4.001206 4.211399 -1.448027  
H -3.445036 6.170034 -0.004060  
C 3.391524 0.863468 -0.367384  
C 4.762043 0.676496 -0.141792  
C 2.961284 2.038614 -1.029712  
C 5.696032 1.632556 -0.551079  
H 5.104967 -0.232671 0.357554  
C 3.894693 3.000262 -1.437440  
C 5.256289 2.790424 -1.194663  
H 6.760330 1.470812 -0.367406  
H 3.572313 3.909304 -1.944822  
H 5.976654 3.545457 -1.518969  
C 3.032311 -1.922551 0.436093  
C 3.529465 -2.315167 1.690305  
C 3.201912 -2.781218 -0.665871  
C 4.179381 -3.545137 1.836607  
H 3.417353 -1.668717 2.562599  
C 3.861324 -4.003151 -0.518942  
H 2.811055 -2.490401 -1.645669  
C 4.347343 -4.389282 0.735193  
H 4.559790 -3.842181 2.817132  
H 3.990475 -4.658962 -1.383445  
H 4.856530 -5.348887 0.853689  
C -0.486984 -3.171565 1.015137  
H 0.373550 -3.307070 0.347254  
H -0.212327 -3.514949 2.026300

H -1.335656 -3.768257 0.641291  
C 1.088231 3.332089 -1.839168  
H 1.475205 3.466226 -2.863415  
H 0.000452 3.191279 -1.878715  
H 1.309361 4.231582 -1.240206  
C -0.534485 -1.608417 -3.068169  
C -6.268441 -3.237295 -2.550150  
C -1.700105 -1.000224 -2.665214  
H 0.082498 -1.184236 -3.867576  
H -0.298204 -2.632926 -2.756687  
C -5.049463 -2.779885 -1.750677  
H -5.987770 -3.972382 -3.323264  
H -6.752550 -2.388774 -3.062676  
C -2.752582 -1.657207 -1.804258  
H -1.995278 -0.061980 -3.155869  
C -3.974281 -2.119791 -2.617770  
H -4.606591 -3.643443 -1.221301  
H -5.364109 -2.072584 -0.961687  
H -2.316815 -2.522849 -1.276988  
H -3.098666 -0.959361 -1.021328  
H -3.640490 -2.822590 -3.401775  
H -4.408505 -1.253422 -3.149259  
H -7.023999 -3.708746 -1.901329

<sup>4</sup>T5-7B

Geometry with 73 atoms:

Total energy: -3118.348941130  
Cr 0.087877 -0.323871 1.401516  
P -1.591368 0.214606 -0.449048  
P 1.660212 -0.152118 -0.455387  
O -0.063360 2.708974 -0.400039  
O 0.097767 -2.439971 0.424134  
C 0.789703 0.306809 -2.036537  
C -0.663690 -0.187065 -0.527431  
H 0.830606 1.400227 -2.119010  
H 1.326858 -0.128619 -2.893175  
H -1.210718 0.209488 -2.893444  
H -0.683600 -1.287093 -2.091881  
C -2.264803 1.913461 -0.630237  
C -3.634961 2.162427 -0.799066  
C -1.379035 3.013349 -0.527242  
C -4.128166 3.468989 -0.856681  
H -4.330890 1.325645 -0.880812  
C -1.874175 4.323584 -0.573046  
C -3.245220 4.542863 -0.737632  
H -5.198020 3.642321 -0.989930  
H -1.199145 5.174410 -0.485542  
H -3.619787 5.568804 -0.774205  
C -3.075998 -0.861421 -0.510071  
C -3.505751 -1.530823 -1.667666  
C -3.805428 -1.024924 0.682893  
C -4.634152 -2.356966 -1.626693  
H -2.974573 -1.413227 -2.613657  
C -4.937461 -1.841200 0.717751  
H -3.488191 -0.507681 1.591751  
C -5.350544 -2.514710 -0.437196  
H -4.957059 -2.874605 -2.533371  
H -5.495737 -1.955413 1.650116  
H -6.232315 -3.159530 -0.410149  
C 2.121891 -1.909994 -0.709521  
C 3.300227 -2.312558 -1.350240  
C 1.239651 -2.893278 -0.215806  
C 3.598752 -3.668024 -1.511674  
H 3.995411 -1.553999 -1.718669  
C 1.530010 -4.251225 -0.375435  
C 2.710858 -4.628641 -1.025170  
H 4.521524 -3.970157 -2.011219  
H 0.859838 -5.021041 0.004497  
H 2.934527 -5.691733 -1.141954  
C 3.209764 0.801039 -0.411836  
C 3.775581 1.384731 -1.558731  
C 3.836973 0.971437 0.835055  
C 4.953451 2.130403 -1.454396  
C 3.305119 1.264854 -2.536777  
C 5.016856 1.711766 0.931376  
H 3.392769 0.525892 1.728586  
C 5.573916 2.294910 -0.211897  
H 5.388408 2.583548 -2.348518  
H 5.499065 1.840385 1.903389  
H 6.493474 2.880112 -0.134307  
C 0.891420 3.742237 -0.208264

H 1.865147 3.248220 -0.103209  
H 0.926486 4.422809 -1.076215  
H 0.679144 4.321054 0.705610  
C -0.921237 -3.388791 0.771904  
H -0.571370 -4.064185 1.568218  
H -1.777744 -2.809187 1.129878  
H -1.226365 -3.967890 -0.113119  
C 0.369250 1.480899 2.367564  
C 0.649314 0.909298 3.769302  
H 1.215457 2.049965 1.960806  
H -0.541485 2.098059 2.308880  
H 0.078086 1.406349 4.574658  
H 1.715412 0.984340 4.031083  
C 0.241666 -0.558979 3.703911  
C -1.039368 -0.857473 3.248446  
H 1.339121 -0.848734 2.343210  
H 0.833869 -1.315569 4.228459  
H -1.773678 -0.050828 3.154878  
H -1.432380 -1.876205 3.311915

<sup>4</sup>7B

Geometry with 73 atoms:

Total energy: -3118.356005120

Cr -0.144455 0.295960 1.423865  
P 1.537119 -0.235577 -0.503319  
P -1.674293 0.183600 -0.427726  
O -0.021528 -2.705633 -0.418932  
O -0.014332 2.406066 0.470829  
C -0.864920 -0.287350 -2.036412  
C 0.586767 0.204772 -2.052668  
H -0.915749 -1.380067 -2.122947  
H -1.423446 0.157230 -2.874542  
H 1.120982 -0.171130 -2.938372  
H 0.595441 1.305131 -2.098281  
C 2.179315 -1.940284 -0.749727  
C 3.531790 -2.210477 -1.006972  
C 1.281317 -3.027938 -0.615550  
C 3.998466 -3.523785 -1.111147  
H 4.236035 -1.384848 -1.122583  
C 1.751232 -4.345362 -0.705421  
C 3.106312 -4.584909 -0.951963  
H 5.054995 -3.712379 -1.312660  
H 1.067448 -5.185954 -0.591546  
H 3.460744 -5.616173 -1.023327  
C 3.028301 0.834578 -0.562948  
C 3.301412 1.735853 -1.605008  
C 3.901368 0.792366 0.541547  
C 4.413968 2.582127 -1.536104  
H 2.657288 1.790493 -2.483446  
C 5.016154 1.629673 0.603000  
H 3.716977 0.088836 1.356359  
C 5.271140 2.534155 -0.434229  
H 4.612525 3.278088 -2.354912  
H 5.687107 1.577533 1.463996  
H 6.139580 3.195441 -0.384964  
C -2.061653 1.962883 -0.657932  
C -3.222389 2.415458 -1.296838  
C -1.141707 2.907704 -0.157691  
C -3.468878 3.782758 -1.446633  
H -3.946334 1.687274 -1.671251  
C -1.381235 4.276871 -0.303237  
C -2.546551 4.704680 -0.949599  
H -4.379314 4.124071 -1.943503  
H -0.682333 5.016268 0.085251  
H -2.730864 5.776445 -1.055221  
C -3.256142 -0.715871 -0.353389  
C -3.859000 -1.261744 -1.501087  
C -3.872131 -0.883674 0.899665  
C -5.061958 -1.965110 -1.392011  
H -3.400272 -1.145866 -2.485013  
C -5.075613 -1.584738 0.999887  
H -3.401465 -0.466490 1.792388  
C -5.670510 -2.128102 -0.143643  
H -5.525451 -2.386290 -2.287428  
H -5.548186 -1.711521 1.976895  
H -6.609860 -2.680475 -0.061975  
C -0.984228 -3.722718 -0.184889  
H -1.941997 -3.211160 -0.028173  
H -1.075063 -4.397127 -1.053736  
H -0.737282 -4.310684 0.714357  
C 1.004110 3.318847 0.903398

H 0.637283 3.948608 1.729054  
H 1.845623 2.708253 1.246744  
H 1.342811 3.946442 0.065592  
C -0.382051 -1.515676 2.351414  
C -0.367238 -1.053144 3.817858  
H -1.309747 -2.034673 2.075849  
H 0.476451 -2.156094 2.091723  
H 0.170715 -1.751056 4.487985  
H -1.390012 -0.962160 4.210607  
C 0.302442 0.309408 3.885988  
C 1.490194 0.573961 3.288994  
H -1.523439 0.805527 2.122460  
H -0.203947 1.113681 4.431702  
H 2.079926 -0.228891 2.833832  
H 1.965757 1.555600 3.366880

<sup>4</sup>TS7-8B

Geometry with 73 atoms:

Total energy: -3118.339152210

Cr 0.066076 -0.096667 1.405311  
P -1.568717 0.178368 -0.475197  
P 1.566323 -0.171013 -0.470136  
O -0.001921 2.412143 0.676803  
O 0.050088 -2.616616 0.118899  
C 0.707063 0.301453 -2.064737  
C -0.707317 -0.282877 -2.066466  
H 0.662164 1.401729 -2.106598  
H 1.284280 -0.048652 -2.934057  
H -1.294448 0.075628 -2.926002  
H -0.665479 -1.381683 -2.111601  
C -1.879910 1.978343 -0.706560  
C -2.921389 2.452276 -1.519389  
C -1.013394 2.914254 -0.094956  
C -3.114571 3.819772 -1.722970  
H -3.596405 1.736909 -1.995362  
C -1.203777 4.288247 -0.299153  
C -2.252600 4.731235 -1.109266  
H -3.931898 4.169545 -2.356989  
H -0.544164 5.017537 0.169276  
H -2.392386 5.804757 -1.258280  
C -3.224445 -0.602608 -0.575430  
C -3.449637 -1.766403 -1.330814  
C -4.276998 -0.082444 0.202032  
C -4.700629 -2.392391 -1.310018  
H -2.656514 -2.196084 -1.944990  
C -5.524542 -0.708281 0.216979  
H -4.124487 0.825409 0.790850  
C -5.739524 -1.866993 -0.537815  
H -4.862841 -3.293232 -1.907039  
H -6.333637 -0.287569 0.819075  
H -6.716526 -2.355952 -0.526052  
C 2.110400 -1.900027 -0.789185  
C 3.350254 -2.197781 -1.370732  
C 1.249516 -2.964743 -0.433978  
C 3.739851 -3.520594 -1.598943  
H 4.024511 -1.382247 -1.642389  
C 1.638255 -4.291761 -0.656886  
C 2.881652 -4.560510 -1.238629  
H 4.709824 -3.734620 -2.052607  
H 0.984628 -5.118998 -0.380809  
H 3.176243 -5.599217 -1.407467  
C 3.107196 0.821031 -0.435323  
C 3.458471 1.724105 -1.452598  
C 3.948102 0.697550 0.686724  
C 4.622106 2.493856 -1.343041  
H 2.835924 1.839021 -2.341060  
C 5.112528 1.459870 0.787720  
H 3.688907 -0.002188 1.484966  
C 5.449774 2.365221 -0.225138  
H 4.882870 3.193143 -2.141305  
H 5.758473 1.349269 1.662201  
H 6.358660 2.966288 -0.143355  
C 1.024996 3.282114 1.153778  
H 1.779270 2.641226 1.624906  
H 1.494443 3.831192 0.321985  
H 0.632904 3.994116 1.898338  
C -0.889719 -3.621390 0.472013  
H -0.496702 -4.285726 1.260078  
H -1.778455 -3.097515 0.845487  
H -1.180363 -4.226839 -0.402880  
C 0.878475 0.415958 3.305481

C 0.168152 -0.576000 4.227765  
H 1.914538 0.634037 3.599294  
H 0.327294 1.377500 3.259535  
H -0.232739 -0.104592 5.143104  
H 0.858981 -1.369161 4.548728  
C -0.934082 -1.179910 3.378512  
C -1.991204 -0.482515 2.899305  
H 1.541097 -0.369572 1.952210  
H -0.837286 -2.237232 3.100738  
H -2.182924 0.553028 3.204422  
H -2.761321 -0.962134 2.290848

<sup>8</sup>B

Geometry with 73 atoms:

Total energy: -3118.425391550

Cr 0.006414 -0.209663 1.410936  
P -1.830670 0.189052 -0.284770  
P 1.503332 0.206511 -0.604848  
O -0.404863 2.524578 0.711760  
O 0.256071 -2.408398 -0.286885  
C 0.372590 0.845631 -1.947089  
C -0.986951 0.134119 -1.951705  
H 0.247088 1.922556 -1.753856  
H 0.857840 0.732222 -2.928879  
H -1.641310 0.583957 -2.714463  
H -0.864367 -0.932706 -2.197018  
C -2.497717 1.901128 -0.192089  
C -3.797975 2.239718 -0.590708  
C -1.656705 2.915366 0.325388  
C -4.261901 3.554802 -0.492160  
H -4.460074 1.462963 -0.980455  
C -2.116682 4.234680 0.421704  
C -3.417461 4.545413 0.011272  
H -5.278206 3.800824 -0.806982  
H -1.475021 5.021679 0.817338  
H -3.768669 5.577008 0.092717  
C -3.294989 -0.894337 -2.632550  
C -3.810247 -1.315974 -1.700690  
C -3.910182 -1.338838 0.721597  
C -4.918391 -2.168133 -1.747992  
H -3.357967 -0.983473 -2.636777  
C -5.023530 -2.179799 0.670660  
H -3.511107 -1.023202 1.690393  
C -5.526955 -2.599401 -0.565736  
H -5.310240 -2.491981 -2.715421  
H -5.496460 -2.513777 1.597480  
H -6.393658 -3.263689 -0.607038  
C 2.135293 -1.382497 -1.287105  
C 3.319207 -1.478874 -2.030904  
C 1.395280 -2.560917 -1.027426  
C 3.764154 -2.710441 -2.520138  
H 3.903973 -0.577176 -2.227308  
C 1.835863 -3.795973 -1.517951  
C 3.018482 -3.861889 -2.262580  
H 4.688569 -2.767078 -3.098732  
H 1.270345 -4.707097 -1.323585  
H 3.355590 -4.830137 -2.640725  
C 2.943175 1.337093 -0.620685  
C 3.222651 2.231040 -1.667732  
C 3.790503 1.313013 0.502236  
C 4.328211 3.084619 -1.588512  
H 2.587082 2.267604 -2.554405  
C 4.899971 2.157349 0.573268  
H 3.577159 0.628572 1.328252  
C 5.167990 3.048774 -0.471695  
H 4.535716 3.777907 -2.407385  
H 5.553397 2.125155 1.448669  
H 6.031434 3.716081 -0.414377  
C 0.539868 3.496029 1.145676  
H 1.466320 2.949575 1.363400  
H 0.741963 4.238417 0.355411  
H 0.198828 4.012304 2.058803  
C -0.602820 -3.517790 -0.053416  
H -0.096190 -4.308426 0.525157  
H -1.450964 -3.129459 0.525542  
H -0.980518 -3.937564 -1.000568  
C -0.347673 -0.832410 3.601649  
C 1.018174 -0.829812 3.440524  
H -0.874337 0.033379 4.017749  
H -0.919791 -1.765535 3.529436  
H 1.576348 0.075138 3.719532

C 1.846101 -2.069850 3.192165  
H 1.215399 -2.853594 2.737878  
H 2.646769 -1.851964 2.464264  
C 2.479658 -2.602266 4.486854  
H 1.705368 -2.878128 5.220434  
H 3.094244 -3.493858 4.283470  
H 3.129947 -1.844910 4.954593

<sup>49</sup>B

Geometry with 85 atoms:

Total energy: -3275.580967480  
Cr -0.674945 -0.532538 1.215044  
P -1.546330 0.306348 -0.900906  
P 1.621560 -0.262681 -0.265892  
O -0.327767 1.870227 1.310532  
O 4.037331 -0.354094 -2.021935  
C 1.047598 0.385078 -1.926912  
C -0.361654 -0.102125 -2.271303  
H 1.771826 0.081343 -2.693924  
H 1.068361 1.483603 -1.887687  
H -0.717628 0.353381 -3.208998  
H -0.379162 -1.195920 -2.404318  
C -1.454944 2.130605 -0.773823  
C -1.961209 2.962456 -1.784953  
C -1.860976 4.350461 -1.691961  
C -1.248243 4.916108 -0.570915  
C -0.736941 4.110999 0.450111  
C -0.835683 2.715952 0.350949  
H -0.262160 4.579614 1.310467  
H -1.164391 6.001817 -0.481140  
H -2.261411 4.985194 -2.484927  
H -2.452144 2.510926 -2.650706  
C -3.213713 -0.063915 -1.540931  
C -3.409407 -1.060142 -2.513095  
C -4.701984 -1.391397 -2.928332  
C -5.807513 -0.737210 -2.377899  
C -5.618609 0.257620 -1.412742  
C -4.330113 0.594222 -0.993997  
H -4.195377 1.377021 -0.244240  
H -6.478908 0.775958 -0.982655  
H -6.817145 -0.999899 -2.702767  
H -4.843096 -2.167056 -3.684854  
H -2.562151 -1.593385 -2.947885  
C 2.668453 -1.713210 -0.671744  
C 2.375723 -2.971315 -0.125136  
C 3.172834 -4.087009 -0.396093  
C 4.285472 -3.944008 -1.225765  
C 4.605411 -2.703677 -1.786363  
C 3.802393 -1.585016 -1.518278  
H 5.478407 -2.617258 -2.432929  
H 4.919427 -4.806435 -1.446876  
H 2.923778 -5.056827 0.039200  
H 1.503750 -3.084029 0.517868  
C 2.818282 0.989100 0.360965  
C 2.633334 2.365836 0.152927  
C 3.506904 3.295158 0.726406  
C 4.572761 2.865957 1.522420  
C 4.763616 1.496961 1.736502  
C 3.895391 0.566169 1.160939  
H 4.069641 -0.500103 1.324520  
H 5.598542 1.148808 2.349894  
H 5.255267 3.593333 1.968524  
H 3.351576 4.361835 0.544474  
H 1.808399 2.736128 -0.457586  
C 1.313400 -1.081768 2.968810  
C 0.153847 -1.239635 3.631960  
H -0.356358 -2.205075 3.666256  
H -0.285253 -0.435952 4.229463  
H 1.790422 -1.916600 2.448424  
H 1.875325 -0.142751 2.989324  
C -1.068840 -2.480983 0.684184  
C -2.473509 -3.056114 0.491903  
C -3.318528 -3.284436 1.752799  
C -4.048293 -2.072953 2.348597  
C -3.205491 -1.051544 3.121806  
C -2.389671 -0.067048 2.282952  
H -2.000256 0.736734 2.938062  
H -3.068648 0.437941 1.571667  
H -2.561644 -1.594681 3.837200  
H -3.900492 -0.467068 3.756668  
H -4.816406 -2.461517 3.040005

H -4.604806 -1.554430 1.545246  
H -4.088750 -4.033494 1.499424  
H -2.694570 -3.759010 2.534612  
H -3.053804 -2.435620 -0.211342  
H -2.368395 -4.036495 -0.013287  
H -0.496723 -2.606680 -0.254100  
H -0.528779 -3.068276 1.454268  
C 0.145951 2.438992 2.537401  
H 0.412682 1.602812 3.190712  
H 1.041480 3.054096 2.365060  
H -0.643786 3.033332 3.021837  
C 5.213493 -0.097551 -2.772992  
H 5.227610 -0.669318 -3.717014  
H 5.200474 0.975930 -3.003596  
H 6.121729 -0.328801 -2.190578

<sup>4</sup>TS9-10B

Geometry with 85 atoms:

Total energy: -3275.563472970  
Cr -0.534934 -0.689184 1.055591  
P 1.576358 -0.304888 -0.351180  
P -1.489834 0.393053 -0.987335  
O 4.099910 -0.166601 -1.878912  
O -0.337506 1.689048 1.433078  
C -0.346474 0.048023 -2.405225  
C 1.093030 0.046809 -2.018623  
H -0.436761 -1.026977 -2.630832  
H -0.663269 0.605755 -3.300805  
H 1.806244 0.046312 -2.771213  
H 1.209063 1.498377 -1.974899  
C 2.707010 -1.689670 -0.749791  
C 2.431105 -2.997340 -0.327015  
C 3.900776 -1.441314 -1.478027  
C 3.311358 -4.047501 -0.603533  
H 1.512983 -3.201129 0.221712  
C 4.788477 -2.493094 -1.745612  
C 4.487404 -3.786641 -1.308003  
H 3.078345 -5.059476 -0.266407  
H 5.710291 -2.311935 -2.298419  
H 5.186712 -4.597610 -1.526676  
C 2.669485 0.941367 0.451231  
C 2.571821 2.318024 0.198707  
C 3.577017 0.493445 1.427700  
C 3.370294 3.226588 0.900716  
H 1.870493 2.705855 -0.540670  
C 4.371750 1.403018 1.219088  
H 3.674653 -0.574705 1.635597  
C 4.271965 2.773977 1.868153  
H 3.284020 4.294893 0.686101  
H 5.076677 1.037002 2.879744  
H 4.897369 3.484917 2.413567  
C -1.313371 2.190795 -0.689880  
C -1.725052 3.134999 -1.644060  
C -0.740342 2.640425 0.519152  
C -1.570314 4.502205 -1.418234  
H -2.183928 2.784777 -2.572513  
C -0.585484 0.419493 0.750926  
C -0.999253 4.932744 -0.217467  
H -1.896220 5.225193 -2.168669  
H -0.137382 4.381744 1.672470  
H -0.871811 6.000473 -0.023106  
C -3.193578 0.167867 -1.595375  
C -4.249627 0.727405 -0.851760  
C -3.486437 -0.646754 -2.702028  
C -5.574436 0.476010 -1.212412  
H -4.036664 1.368032 0.007913  
C -4.815617 -0.894662 -3.057565  
H -2.686683 -1.099468 -3.291342  
C -5.860124 -0.338016 -2.314304  
H -6.387286 0.917519 -0.630781  
H -5.034135 -1.527540 -3.921114  
H -6.897601 -0.535823 -2.594239  
C 5.334069 0.216784 -2.463825  
H 5.272884 1.301547 -2.623507  
H 6.182254 -0.000710 -1.792442  
H 5.498189 -0.281397 -3.434995  
C 0.155207 2.137049 2.703754  
H 1.093537 2.697005 2.581581  
H -0.598833 2.754618 3.215501  
H 0.351977 1.242583 3.301299  
C -2.237310 -0.504163 2.464875

C -3.319449 -1.358546 3.110101  
C -4.058539 -2.320990 2.173967  
C -3.243822 -3.418791 1.469104  
C -2.492800 -3.028569 0.179197  
H -1.043288 -2.550251 0.315669  
H -2.069852 0.430719 3.016593  
H -2.598710 -0.222508 1.456022  
H -2.920888 -1.919506 3.975139  
H -4.072589 -0.675105 3.543962  
H -4.845101 -2.810526 2.773417  
H -4.594498 -1.734745 1.404717  
H -3.958385 -4.213765 1.198245  
H -2.544178 -3.890370 2.183948  
H -2.479498 -3.925239 -0.470083  
H -3.098591 -2.291675 -0.376420  
H -0.483260 -3.269022 0.942821  
H -0.562968 -2.573128 -0.680412  
C 0.763634 -1.350491 2.631441  
C -0.487794 -1.515179 3.259518  
H 1.433558 -0.552153 2.966363  
H 1.267762 -2.229358 2.222392  
H -0.948231 -2.504728 3.243944  
H -0.726127 -0.933687 4.153338

<sup>4</sup>10B

Geometry with 85 atoms:

Total energy: -3275.605705410  
Cr -0.391543 -0.432296 0.918641  
P -1.905247 -0.004855 -0.893382  
P 1.375008 0.324198 -0.932614  
O -0.756297 1.927995 0.994519  
O 3.526869 -1.020415 0.393976  
C 0.289899 0.892033 -2.342538  
C -0.976055 0.037688 -2.498406  
H 0.851947 0.923165 -3.287975  
H 0.018837 1.933444 -2.106381  
H -0.726324 -1.001513 -2.762891  
H -1.629656 0.436800 -3.290269  
C -2.458597 1.720586 -0.659208  
C -3.493119 2.288925 -1.417942  
C -3.854572 3.262032 -1.248609  
C -3.169865 4.405159 -0.313037  
C -2.132584 3.864655 0.452262  
C -1.775267 2.521127 0.282304  
H -1.616811 4.498555 1.171750  
H -3.441227 5.453845 -0.169853  
H -4.663735 4.056327 -1.841970  
H -4.025728 1.668901 -2.143623  
C -3.380168 -1.043583 -1.124506  
C -3.298582 -2.217075 -1.895620  
C -4.400503 -3.070047 -1.992193  
C -5.585988 -2.767748 -1.315399  
C -5.667497 -1.608996 -0.536789  
C -4.570879 -0.750407 -0.435642  
H -4.647402 0.150615 0.175849  
H -6.590440 -1.369840 -0.003003  
H -6.446127 -3.437104 -1.392734  
H -4.330039 -3.976373 -2.598256  
H -2.377687 -2.478666 -2.420789  
C 2.420459 -0.993388 -1.671877  
C 2.243614 -1.509029 -2.962530  
C 3.034273 -2.562523 -3.433559  
C 4.016691 -3.108638 -2.607188  
C 4.216173 -2.612950 -1.314843  
C 3.420158 -1.560551 -0.846621  
H 4.985709 -3.052808 -0.680746  
H 4.639676 -3.931940 -2.965020  
H 2.881709 -2.949908 -4.443059  
H 1.483341 -1.091515 -3.624584  
C 2.512729 1.748966 -0.666875  
C 3.053218 1.952349 0.614108  
C 3.914719 3.023264 0.861819  
C 4.245520 3.908294 -0.169442  
C 3.716060 3.712910 -1.448552  
C 2.857963 2.637782 -1.698664  
H 2.468108 2.496839 -2.708643  
H 3.976333 4.397251 -2.259802  
H 4.918475 4.474514 0.023049  
H 4.330341 3.166594 1.862517  
H 2.810358 1.257642 1.419940  
C 4.559503 -1.444911 1.266883



H 4.495514 -0.808252 2.159336  
H 5.554578 -1.312500 0.809118  
H 4.430813 -2.499217 1.566847  
C -0.191381 -2.406304 0.361868  
C 0.868066 -3.142510 1.192861  
C 0.723310 -2.883238 2.695983  
C 1.163837 -1.477385 3.118526  
C 0.644419 -0.997536 4.474306  
H 1.069317 -1.661496 5.247876  
H 1.059398 0.005727 4.681198  
C -0.881074 -0.955120 4.651811  
C -1.668151 -0.033519 3.704418  
C -1.950432 -0.555685 2.284078  
H -2.331053 -1.591622 2.319756  
H -2.760850 0.054674 1.844886  
H -2.639528 0.170806 4.194312  
H -1.168498 0.954075 3.670833  
H -1.071685 -0.628745 5.688194  
H -1.296763 -1.975111 4.585423  
H 0.918047 -0.694629 2.350200  
H 2.264818 -1.423461 3.099586  
H 1.324000 -3.605584 3.275216  
H -0.325501 -3.055776 2.984208  
H 1.879300 -2.845923 0.871425  
H 0.800371 -4.230777 1.005821  
H -1.186608 -2.858251 0.517804  
H 0.045308 -2.486677 -0.714386  
C -0.004099 2.725889 1.915344  
H 0.520199 3.537867 1.389389  
H -0.652505 3.134345 2.705365  
H 0.736921 2.059927 2.369487

\*10B'

Geometry with 85 atoms:

Total energy: -3275.604883010  
Cr -0.042811 -0.176133 0.977089  
P 1.632241 0.278730 -0.821504  
P -1.713961 0.399035 -0.854122  
O 3.033311 -1.871026 0.455582  
O -0.281805 2.290285 0.893906  
C -0.696535 0.517449 -2.408613  
C 0.658868 1.182132 -2.124963  
H -0.555365 -0.511101 -2.777410  
H -1.250258 1.079429 -3.177133  
H 1.238097 1.284312 -3.054752  
H 0.513253 2.200284 -1.731349  
C 2.342930 -1.181304 -1.673801  
C 2.249479 -1.402454 -3.054287  
C 2.754217 -2.572000 -3.630526  
C 3.359501 -3.532315 -2.818255  
C 3.470490 -3.335024 -1.438746  
C 2.968593 -2.160027 -0.863869  
H 3.948800 -4.094651 -0.820908  
H 3.755716 -4.450626 -3.258563  
H 2.673452 -2.728768 -4.708083  
H 1.777412 -0.661476 -3.701757  
C 3.040467 1.389956 -0.425787  
C 3.399844 2.469503 -1.250277  
C 4.457776 3.309510 -0.888768  
C 5.170692 3.076731 0.290677  
C 4.823985 1.997518 1.110419  
C 3.763124 1.160352 0.758999  
H 3.490800 0.323220 1.400602  
H 5.379922 1.808065 2.032052  
H 5.997762 3.734208 0.569615  
H 4.727583 4.147187 -1.536683  
H 2.867295 2.667177 -2.182154  
C -2.203734 2.135378 -0.513080  
C -3.346948 2.721572 -1.076278  
C -3.703440 4.037211 -0.774535  
C -2.910532 4.776279 0.104823  
C -1.764306 4.216373 0.678006  
C -1.408116 2.898095 0.368652  
H -1.167196 4.814512 1.364566  
H -3.180903 5.804528 0.356729  
H -4.596775 4.479107 -1.220621  
H -3.970686 2.132738 -1.752802  
C -3.265627 -0.448140 -1.304287  
C -3.471663 -1.060470 -2.550014  
C -4.659147 -1.756582 -2.802179  
C -5.647846 -1.843562 -1.819883

C -5.449495 -1.232399 -0.575823  
C -4.264332 -0.545385 -0.316241  
H -4.114994 -0.079703 0.662220  
H -6.219006 -1.297549 0.197185  
H -6.573573 -2.387981 -2.021289  
H -4.809400 -2.230621 -3.775208  
H -2.716467 -1.004659 -3.335465  
C 0.688378 3.128577 1.539488  
H 1.576993 2.515118 1.705943  
H 0.308694 3.500750 2.503642  
H 0.958458 3.974494 0.889233  
C 3.536850 -2.826103 1.374182  
H 2.956290 -3.763655 1.340030  
H 4.601988 -3.045298 1.186015  
H 3.435527 -2.379477 2.372044  
C 0.986504 -0.036367 2.724114  
C -0.377277 0.148811 3.348930  
C -0.773079 -0.809361 4.485481  
C -0.890798 -2.265538 4.028964  
C -2.143682 -2.549757 3.175108  
H -2.956737 -2.876387 3.844556  
H -2.515678 -1.616653 2.713449  
C -1.929316 -3.586875 2.061898  
C -1.476252 -3.012162 0.711243  
C -0.156569 -2.227163 0.656013  
H 0.618140 -2.682153 1.295640  
H 0.232689 -2.272351 -0.375563  
H -1.399665 -3.863782 0.007524  
H -2.301402 -2.399005 0.309988  
H -2.871580 -4.133040 1.885305  
H -1.204721 -4.347047 2.407915  
H -0.895195 -2.927890 4.910165  
H 0.016844 -2.537276 3.467860  
H -1.730028 -0.481396 4.928395  
H -0.011052 -0.715595 5.276850  
H -1.205958 0.010162 2.555297  
H -0.542409 1.196766 3.646773  
H 1.485974 -0.980502 2.979640  
H 1.670562 0.808478 2.868170

\*TS10-11B

Geometry with 85 atoms:

Total energy: -3275.591723150  
Cr -0.027823 0.100852 1.158811  
P -1.635756 0.276728 -0.740284  
P 1.487104 0.271218 -0.888063  
O -0.429513 2.569862 0.705075  
O 0.163438 -2.360461 -0.495928  
C 0.518460 0.998082 -2.304695  
C -0.813056 0.256231 -2.413667  
H 0.347410 2.064037 -2.087933  
H 1.104613 0.929625 -3.233707  
H -1.475908 0.708396 -3.167203  
H -0.636633 -0.790709 -2.701401  
C -2.285555 1.998143 -0.661575  
C -3.450791 2.380561 -1.342881  
C -1.578971 2.975230 0.078512  
C -3.923318 3.693395 -1.288824  
H -4.002609 1.632902 -1.917656  
C -2.052894 4.292680 0.139564  
C -3.221329 4.642429 -0.543370  
H -4.833783 3.970768 -1.824075  
H -1.521498 5.051857 0.712176  
H -3.580879 5.672797 -0.488126  
C -3.113966 -0.792873 -0.926258  
C -3.136139 -1.851537 -1.851838  
C -4.223313 -0.614246 -0.077221  
C -4.236746 -2.711180 -1.921693  
H -2.298561 -2.022140 -2.529575  
C -5.320031 -1.474895 -0.150871  
H -4.241932 0.210959 0.635956  
C -5.329513 -2.528591 -1.070798  
H -4.238487 -3.525827 -2.650222  
H -6.173594 -1.317722 0.513014  
H -6.188723 -3.201279 -1.127138  
C 2.017094 -1.353787 -1.572605  
C 3.132652 -1.468050 -2.417365  
C 1.271005 -2.519624 -1.271984  
C 3.527835 -2.703017 -2.935006  
H 3.708469 -0.574482 -2.667501  
C 1.672457 -3.762555 -1.783414

C 2.797524 -3.846933 -2.607398  
H 4.400718 -2.768828 -3.587651  
H 1.113413 -4.666972 -1.546384  
H 3.098551 -4.821836 -2.998720  
C 3.011288 1.285572 -0.794864  
C 2.985396 2.650004 -1.134644  
C 4.192092 0.743262 -0.253320  
C 4.118211 3.448191 -0.948686  
H 2.083977 3.104116 -1.550523  
C 5.321711 1.543725 -0.072113  
H 4.232993 -0.311722 0.024570  
C 5.288561 2.898370 -0.418566  
H 4.084873 4.504715 -1.226151  
H 6.232148 1.105110 0.343504  
H 6.173636 3.523202 -0.276811  
C 0.347454 3.509232 1.445364  
H 1.219581 2.959777 1.819843  
H 0.693300 4.334712 0.802617  
H -0.222234 3.915209 2.297407  
C -0.662921 -3.478981 -0.195681  
H -0.117083 -4.238808 0.385946  
H -1.496030 -3.091710 0.402736  
H -1.066457 -3.934907 -1.114032  
C 1.932121 0.164842 2.357263  
C 2.599849 -1.214818 2.328901  
H 2.469065 0.890089 1.732420  
H 2.009418 0.568457 3.384984  
C -1.850326 -0.009679 2.224080  
C 1.993016 -2.248672 3.292142  
H 2.579369 -1.632270 1.306210  
H 3.671255 -1.098356 2.580643  
C -0.837820 0.219387 3.232804  
H -2.542851 0.811555 2.012656  
H -2.324130 -0.997225 2.169489  
C 0.532178 -2.646455 2.975115  
H 2.629264 -3.148274 3.271632  
H 2.066787 -1.862712 4.324111  
C -0.592721 -0.766426 4.383971  
H 0.448716 0.214452 2.760933  
H -0.808750 1.259088 3.597385  
C -0.525271 -2.253100 4.017948  
H 0.466763 -3.737011 2.829885  
H 0.253552 -2.222406 1.994898  
H 0.335424 -0.474960 4.904781  
H -1.401302 -0.621946 5.121410  
H -1.513949 -2.590120 3.660840  
H -0.337102 -2.817938 4.947382

\*11B

Geometry with 85 atoms:

Total energy: -3275.653699000  
Cr 0.266440 -0.215720 -1.200615  
P 0.034545 1.462228 0.696962  
P 2.343330 -0.892877 0.099308  
O -0.790996 -1.279514 1.230224  
O 2.627070 1.606322 -1.374363  
C 2.138740 -0.109511 1.784642  
C 1.600002 1.325424 1.708408  
H 1.440378 -0.755316 2.337224  
H 3.103572 -0.117423 2.315373  
H 1.423556 1.714890 2.722981  
H 2.331460 1.985019 1.215707  
C -1.311040 0.940216 1.842434  
C -2.108206 1.848449 2.552397  
C -1.589263 -0.443268 1.958416  
C -3.155171 1.405539 3.366642  
H -1.911259 2.919030 2.462862  
C -2.634372 -0.891201 2.774454  
C -3.412210 0.038194 3.743858  
H -3.765857 2.128194 3.911959  
H -2.852528 -1.954808 2.867646  
H -4.228479 -0.319619 4.106104  
C -0.218325 3.262059 0.472435  
C 0.412721 4.242290 1.256795  
C -1.083281 3.666787 -0.560897  
C 0.183354 5.599302 1.007143  
H 1.083337 3.960583 2.070626  
C -1.319799 5.021941 -0.800096  
H -1.573594 2.913436 -1.184601  
C -0.682545 5.991385 -0.017769  
H 0.680668 6.353537 1.622100

H -1.997093 5.322830 -1.603116  
H -0.860800 7.052642 -0.207872  
C 3.919766 -0.175420 -0.517753  
C 5.162400 -0.797293 -0.335935  
C 3.865898 1.055911 -1.214673  
C 6.337028 -0.214229 -0.820039  
H 5.212513 -1.754296 0.188840  
C 5.042218 1.645349 -1.695508  
C 6.270170 1.006136 -1.493893  
H 7.297146 -0.712310 -0.669437  
H 5.013209 2.595766 -2.227751  
H 7.181503 1.474179 -1.874164  
C 2.710669 -2.654001 0.444774  
C 3.118372 -3.137718 1.699273  
C 2.531183 -3.564203 -0.613445  
C 3.338563 -4.506002 1.888976  
H 3.269574 -2.456212 2.538264  
C 2.763043 -4.927978 -0.424129  
H 2.203605 -3.200353 -1.592005  
C 3.163390 -5.401710 0.830222  
H 3.652589 -4.872186 2.869637  
H 2.625032 -5.623954 -1.255301  
H 3.338150 -6.469703 0.982103  
C -0.933748 -2.689454 1.344323  
H -0.191799 -3.126599 0.663790  
H -0.724877 -3.029939 2.372379  
H -1.941894 -3.022642 1.046063  
C 2.481570 2.865937 -2.016812  
H 2.845565 2.834292 -3.057778  
H 1.406735 3.087522 -2.015475  
H 3.009798 3.661957 -1.465278  
C -9.148157 -1.758945 -1.318044  
C -7.765746 -1.613976 -0.683086  
H -9.431952 -0.847746 -1.871692  
H -9.926768 -1.943241 -0.560225  
C -0.753273 -1.454124 -2.877809  
C -6.654107 -1.360374 -1.705179  
H -7.778806 -0.787001 0.050290  
H -7.525480 -2.525488 -0.105424  
C -1.679958 -0.531981 -2.453120  
H -0.130925 -1.271049 -3.760440  
H -0.757535 -2.477327 -2.482976  
C -5.265218 -1.214059 -1.080213  
H -6.639215 -2.186233 -2.440470  
H -6.892039 -0.448177 -2.283520  
C -2.771513 -0.814155 -1.449665  
H -9.173950 -2.598878 -2.033022  
H -1.771478 0.410793 -3.010843  
C -4.156651 -0.957812 -2.103898  
H -5.024094 -2.127004 -0.504023  
H -5.277362 -0.390023 -0.342921  
H -2.534173 -1.734792 -0.891238  
H -2.822774 -0.003263 -0.702198  
H -4.126465 -1.779817 -2.840614  
H -4.387498 -0.041761 -2.677123

<sup>45</sup>C

Geometry with 83 atoms:

Total energy: -3125.156408180  
Cr 0.031949 -0.679998 1.183725  
P -1.762183 0.085000 -0.311807  
C -3.154280 -1.063212 -0.568676  
C -3.523212 -1.560325 -1.828362  
C -4.588651 -2.458426 -1.940555  
C -5.290070 -2.864630 -0.801769  
C -4.918687 -2.379633 0.457311  
C -3.851076 -1.488677 0.576318  
H -3.555947 -1.121582 1.562725  
H -5.460399 -2.699728 1.350575  
H -6.124662 -3.563772 -0.894197  
H -4.872609 -2.839300 -2.924518  
H -2.995744 -1.247068 -2.731508  
C -2.387058 1.732770 0.213117  
C -3.426676 2.464807 -0.411117  
C -3.720198 3.743903 0.093450  
C -3.022807 4.297645 1.167516  
C -1.997240 3.573039 1.779916  
C -1.692005 2.301134 1.300117  
H -0.892706 1.730824 1.785033  
H -1.442286 3.992527 2.621926  
H -3.279779 5.297445 1.526030

H -4.519996 4.320494 -0.379815  
C -4.271848 1.941154 -1.553714  
C -5.634379 1.406200 -1.090468  
H -6.220942 1.044272 -1.949513  
H -5.514608 0.570138 -0.385612  
H -6.218043 2.192894 -0.586581  
H -3.747753 1.149314 -2.103018  
H -4.430745 2.761147 -2.273649  
C -0.938451 0.365206 -1.955693  
C 0.312411 1.239191 -1.777413  
P 1.532159 0.531623 -0.555289  
C 2.592775 1.966497 -0.142923  
C 2.579888 2.479569 1.163207  
C 3.383129 3.572985 1.500188  
C 4.203710 4.159507 0.532515  
C 4.220756 3.653201 -0.772616  
C 3.421109 2.559714 -1.110894  
H 3.456014 2.155013 -2.125718  
H 4.866326 4.108135 -1.527799  
H 4.835683 5.011158 0.795925  
H 3.372401 3.962942 2.520821  
H 1.950684 2.017922 1.929893  
C 2.600209 -0.636332 -1.492998  
C 2.321303 -0.945228 -2.837021  
C 3.066039 -1.904540 -3.524776  
C 4.101572 -2.573563 -2.869139  
C 4.383360 -2.273294 -1.536071  
C 3.650447 -1.312293 -0.822057  
C 4.046959 -1.026509 0.612513  
C 5.295119 -0.141483 0.734036  
H 6.162586 -0.619942 0.252459  
H 5.548311 0.032256 1.792094  
H 5.142130 0.836608 0.255210  
H 4.234563 -1.985673 1.123545  
H 3.212825 -0.555122 1.156739  
H 5.193404 -2.801821 -1.025352  
H 4.687915 -3.331791 -3.393842  
H 2.833861 -2.128223 -4.568667  
H 1.513527 -0.439614 -3.367554  
H 0.797894 1.443260 -2.743882  
H 0.035324 2.219984 -1.357846  
H -0.681180 -0.630360 -2.351642  
H -1.632110 0.837550 -2.667002  
C 0.889039 -1.282520 2.883406  
C 0.528398 -1.537046 3.331622  
C 0.979217 -2.995094 3.503770  
C 0.621987 -3.958119 2.361584  
H -0.465816 -4.144932 2.349127  
H 1.086315 -4.929609 2.597913  
C 1.064058 -3.514722 0.957743  
C 0.140601 -2.507923 0.272926  
H -0.896236 -2.885168 0.235800  
H 0.477379 -2.310288 -0.759642  
H 1.119198 -4.414448 0.315319  
H 2.099995 -3.130821 0.993475  
H 0.534174 -3.370152 4.440957  
H 2.072765 -3.004930 3.656012  
H 0.807902 -0.947036 4.220577  
H 1.279827 -1.074876 2.570825  
H -1.532026 -2.167773 2.810691  
H -1.398049 -0.466958 3.420760

<sup>49</sup>C

Geometry with 89 atoms:

Total energy: -3204.268681830  
Cr 0.179857 -0.983650 1.265570  
P -1.571689 0.241277 -0.291606  
C -2.839460 -0.955691 -0.858784  
C -2.587597 -1.812884 -1.943896  
C -3.507443 -2.807186 -2.287358  
C -4.685121 -2.961472 -1.549587  
C -4.942066 -2.112303 -0.469016  
C -4.026180 -1.115395 -0.122711  
H -4.243818 -0.454653 0.719237  
H -5.862580 -2.223614 0.109040  
H -5.401858 -3.741169 -1.817594  
H -3.301342 -3.464335 -3.135773  
H -1.672083 -1.716924 -2.532088  
C -2.492692 1.699478 0.347683  
C -2.208828 2.058816 1.679757  
C -2.785546 3.180753 2.272905

C -3.662830 3.968097 1.523763  
C -3.965385 3.610509 0.209903  
C -3.408465 2.475785 -0.406354  
C -3.851390 2.152013 -1.820356  
H -3.264103 1.325397 -2.235714  
C -5.339494 1.789357 -1.922126  
H -5.569160 0.893678 -1.325113  
H -5.984703 2.607753 -1.566373  
H -5.613180 1.577841 -2.967961  
H -3.646882 3.028434 -2.459669  
H -4.659889 4.229944 -0.364124  
H -4.117832 4.858883 1.964008  
H -2.551207 3.436319 3.308905  
H -1.527712 1.440173 2.263463  
C -0.692368 0.811948 -1.843638  
C 0.647551 0.102878 -2.074107  
P 1.732519 0.198205 -0.559673  
C 3.308825 -0.612053 -1.047823  
C 3.419672 -1.290692 -2.277258  
C 4.582580 -1.984191 -2.615484  
C 5.656346 -2.009616 -1.723091  
C 5.555380 -1.340434 -0.503331  
C 4.396370 -0.636844 -0.139020  
C 4.375312 0.070611 1.201444  
C 5.323774 1.273076 1.286417  
H 6.366531 0.974469 1.095666  
H 5.282966 1.728686 2.288646  
H 5.053988 2.045392 0.551381  
H 4.649891 -0.658476 1.983358  
H 3.354830 0.404060 1.438794  
H 6.396476 -1.365983 0.195155  
H 6.570687 -2.552234 -1.975322  
H 4.646971 -2.501318 -3.575760  
H 2.598141 -1.284102 -2.994064  
C 2.086030 2.002152 -0.488218  
C 1.269800 2.826975 0.305071  
C 1.472002 4.209857 0.332709  
C 2.497836 4.781157 -0.425668  
C 3.314434 3.967165 -1.218623  
C 3.110311 2.585269 -1.254013  
H 3.756333 1.959289 -1.874104  
H 4.116613 4.410672 -1.813640  
H 6.662149 5.861152 -0.400195  
H 0.825415 4.838244 0.950102  
H 0.460209 2.395888 0.896649  
H 0.491894 -0.964723 -2.296627  
H 1.166022 0.552327 -2.935807  
H -1.343308 0.675331 -2.719042  
H -0.539009 1.895662 -1.725323  
C -1.363399 -1.827239 2.393664  
C -1.521794 -3.352154 2.442538  
H -0.677405 -3.818363 2.981586  
C -1.695208 -4.031709 1.073539  
C -0.411030 -4.258251 0.263335  
C 0.495901 -3.026391 0.090413  
C 1.384450 -2.645823 1.237009  
H 1.308455 -3.288238 2.120873  
H 2.428502 -2.445576 0.967649  
H 1.065936 -3.071554 -0.852435  
H -0.239687 -2.164071 -0.160544  
H 0.193959 -5.053577 0.730043  
H -0.692961 -4.629195 -0.735904  
H -2.174344 -5.014998 1.213005  
H -2.401934 -3.436300 0.470756  
H -2.416505 -3.590222 3.048877  
H -2.304603 -1.386930 2.020612  
H -1.228186 -1.431347 3.416865  
C 0.944378 0.429160 3.101284  
C 1.523667 -0.762835 3.380894  
H 1.018984 -1.513878 3.993103  
H 2.556915 -0.977297 3.103338  
H -0.033913 0.685644 3.517207  
H 1.497369 1.227877 2.599180

<sup>4</sup>TS5-6C

Geometry with 83 atoms:

Total energy: -3125.134852530  
Cr -0.006356 -0.038947 1.288896  
P 1.637597 0.414958 -0.532893  
P -1.461080 -0.042152 -0.751939  
C -0.537210 0.609368 -2.235589

C 0.888921 0.060602 -2.205637  
H -1.061009 0.348380 -3.166296  
H -0.537648 1.707499 -2.171838  
H 0.890898 -1.030717 -2.341381  
H 1.507584 0.482669 -3.011270  
C 3.228613 -0.508152 -0.499451  
C 3.211828 -1.914614 -0.328529  
C 4.457572 0.173509 -0.556064  
C 4.440540 -2.587979 -0.239554  
C 5.665389 -0.519645 -0.467281  
C 5.656466 -1.907442 -0.309787  
H 4.438063 -3.672846 -0.100987  
H 6.609984 0.027322 -0.513906  
H 6.596175 -2.459736 -0.232172  
C 2.037490 2.206722 -0.635645  
C 1.738128 3.046634 0.450434  
C 2.601638 2.772791 -1.794170  
C 1.991916 4.419511 0.381960  
H 1.296698 2.633194 1.359180  
C 2.855213 4.144283 -1.861257  
H 2.858621 2.144417 -2.649415  
C 2.549471 4.970729 -0.774402  
H 1.751501 5.058230 1.235235  
H 3.295782 4.569394 -2.766294  
H 2.747777 6.043850 -0.829944  
C -3.067094 0.856108 -0.727948  
C -3.106861 2.234220 -0.400504  
C -4.263950 0.165104 -0.995050  
C -4.356808 2.874806 -0.391650  
C -5.493594 0.823277 -0.964095  
C -5.538823 2.187510 -0.668450  
H -4.397830 3.942220 -0.156123  
H -6.411645 0.270216 -1.176184  
H -6.494474 2.717144 -0.651290  
C -1.837105 -1.780066 -1.234119  
C -2.172302 -2.131697 -2.554444  
C -1.780445 -2.791598 -0.260040  
C -2.440159 -3.461394 -2.887507  
H -2.239419 -1.369949 -3.333581  
C -2.054950 -4.120883 -0.592854  
H -1.522490 -2.546405 0.770260  
C -2.384089 -4.458781 -1.908106  
H -2.698239 -3.718740 -3.917635  
H -2.008469 -4.892737 0.179148  
H -2.596072 -5.497893 -2.171348  
C 1.775124 -0.034266 2.436911  
C 0.702019 -0.093913 3.399163  
C 0.450352 -1.371869 4.208751  
C -1.017165 -1.544221 4.623019  
C -1.964101 -1.693804 3.421154  
C -1.971165 -0.490403 2.461473  
H 2.351070 -0.948834 2.249625  
H 2.386446 0.872252 2.378184  
H 0.542327 0.823113 3.989315  
H -0.552747 -0.101301 2.839952  
H 0.767411 -2.244388 3.608472  
H 1.103130 -1.356158 5.097946  
H -1.328906 -0.673932 5.229911  
H -1.111760 -2.425438 5.277783  
H -1.683118 -2.610904 2.870208  
H -2.990714 -1.874203 3.787313  
H -2.643997 -0.679412 1.615386  
H -2.372709 0.401921 2.972999  
H 4.478702 1.258750 -0.663344  
H -4.239726 -0.899689 -1.232008  
C 1.936358 -2.729521 -0.238364  
C 1.686827 -3.629627 -1.454194  
H 1.067242 -2.063439 -0.097747  
H 1.978507 -3.355382 0.669751  
H 0.737598 -4.176113 -1.347109  
H 1.640198 -3.046263 -2.387291  
H 2.494975 -4.367929 -1.572735  
C -1.888258 3.053865 -0.017499  
C -1.814671 3.364028 1.483260  
H -1.908184 4.002533 -0.579615  
H -0.955288 2.558761 -0.320488  
H -2.712921 3.899789 1.826990  
H -1.739689 2.440683 2.079333  
H -0.939514 3.993562 1.708374

Geometry with 89 atoms:  
Total energy: -3203.734146480  
Cr 0.135632 -1.330740 0.675795  
P 1.561345 0.387679 -0.764743  
P -1.674813 -0.057010 -0.505339  
C 0.935096 1.006563 -1.858353  
C 0.474863 0.567695 -2.268636  
H -1.603744 1.019955 -2.730931  
H -0.910263 2.029392 -1.454666  
H 0.446446 -0.402007 -2.786553  
H 0.919803 1.301186 -2.959354  
C 3.219182 -0.071493 -1.414569  
C 3.337176 -0.578365 -2.723121  
C 4.368250 -0.006188 -0.581097  
C 4.565180 -1.018829 -3.218575  
H 2.467210 -0.633950 -3.378541  
C 5.591581 -0.450172 -1.107671  
C 5.697426 -0.952290 -2.406038  
H 4.633206 -1.406735 -4.237649  
H 6.488792 -0.400958 -0.487935  
H 6.666660 -1.289269 -2.781633  
C 1.681004 2.140355 -0.218083  
C 2.530750 3.058221 -0.858479  
C 0.867416 2.579858 0.838505  
C 2.565414 4.390935 -0.440902  
H 3.174810 2.729290 -1.678457  
C 0.897069 3.915842 1.248699  
H 0.194109 1.883660 1.342175  
C 1.749556 4.821911 0.612042  
H 3.233402 5.097465 -0.939532  
H 0.253133 4.244795 2.067998  
H 1.780326 5.865084 0.935893  
C -2.697899 1.065150 0.532616  
C -3.732314 1.902742 0.045885  
C -2.403864 1.054666 1.909888  
C -4.423619 2.698880 0.976265  
C -3.099185 1.857916 2.811975  
C -4.118466 2.686750 2.337322  
H -5.229337 3.343959 0.614743  
H -2.853978 1.826580 3.876112  
H -4.682464 3.318700 3.027881  
C -2.843338 -1.189010 -1.349931  
C -4.042251 -1.571844 -0.724701  
C -2.506562 -1.753483 -2.592538  
C -4.891794 -2.495706 -1.339038  
H -4.323182 -1.138811 0.237818  
C -3.361042 -2.674494 -3.203604  
H -1.575411 -1.481111 -3.093681  
C -4.554812 -3.048204 -2.578301  
H -5.824433 -2.781066 -0.846293  
H -3.091758 -3.102146 -4.172490  
H -5.222280 -3.768333 -3.057588  
C 1.957738 -2.119555 1.639881  
C 1.454319 -1.073016 2.641724  
C 1.058534 -1.611549 4.021235  
C -0.027499 -2.691316 4.028103  
C -1.327117 -2.281473 3.323205  
C -1.293728 -2.383154 1.793992  
H 2.201742 -3.042671 2.174309  
H 2.843481 -1.766250 1.105504  
H 2.233806 -0.302738 2.751696  
H 0.592486 -0.416940 2.286153  
H 1.972597 -2.000786 4.501328  
H 0.724829 -0.760052 4.639619  
H -0.237482 -2.945490 5.080174  
H 0.356919 -3.619734 3.568430  
H -2.142318 -2.926379 3.702517  
H -1.602751 -1.259569 3.645996  
H -1.142183 -3.441492 1.513169  
H -2.284945 -2.113937 1.391758  
C 0.291044 -2.793063 -0.799075  
C 1.241130 -3.336716 0.114767  
H 0.670079 -2.403109 -1.749496  
H 0.701070 -3.251281 -0.853407  
H -0.908716 -4.151528 0.762281  
H 2.280342 -3.428304 -0.211346  
H -1.626741 0.388115 2.284989  
C -4.128529 2.017672 -1.412296  
C -3.681341 3.338644 -2.054729  
H -5.226956 1.943223 -1.478107  
H -3.743697 1.168540 -1.991425

H -4.123238 4.204109 -1.536076  
H -2.587343 3.458335 -2.018076  
H -3.993657 3.383980 -3.110173  
C 4.310994 0.562226 0.825643  
C 5.207799 -0.116546 1.862713  
H 3.272306 0.534329 1.184812  
H 4.553004 1.639029 0.777187  
H 6.277777 0.026436 1.649045  
H 5.022697 0.309144 2.861556  
H 5.019586 -1.201123 1.914073

catalyst\_model\_A-01

Geometry with 53 atoms:

Total energy: -2731.334953030  
P 1.763143 0.015800 0.231112  
P -1.731496 -0.085952 0.238173  
C -0.660127 0.335964 -1.234318  
C 0.695757 -0.386478 -1.255240  
H -1.219404 0.139644 -2.163040  
H -0.520383 1.428288 -1.188720  
H 0.560431 -1.480500 -1.251397  
H 1.242109 -0.120559 -2.174011  
C 3.191725 -1.122406 0.097151  
C 3.557776 -1.775996 -1.092513  
C 3.954636 -1.337444 1.258887  
C 4.666363 -2.627872 -1.113583  
H 2.989104 -1.625524 -2.012069  
C 5.067205 -2.180328 1.231652  
H 3.675307 -0.839002 2.192151  
C 5.422666 -2.829853 0.044753  
H 4.941452 -3.134093 -2.042229  
H 5.653705 -2.336687 2.140283  
H 6.288368 -3.496334 0.023628  
C 2.413292 1.688787 -0.177019  
C 3.616422 1.885603 -0.875177  
C 1.653021 2.807974 0.207463  
C 4.041197 3.179316 -1.190572  
H 4.228533 1.030393 -1.170257  
C 2.075304 4.099188 -0.118924  
H 0.722787 2.673933 0.768153  
C 3.271745 4.682429 -0.818081  
H 4.980803 3.322812 -1.729927  
H 1.473627 4.968007 0.180902  
H 3.608128 5.295760 -1.066652  
C -2.457008 -1.730485 -0.142254  
C -3.208632 -2.348351 0.874596  
C -2.293756 -2.394637 -1.369063  
C -3.798941 -3.594935 0.662894  
H -3.341649 -1.844656 1.837189  
C -2.877269 -3.649726 -1.574143  
H -1.714125 -1.943101 -2.176247  
C -3.631765 -4.249799 -0.562824  
H -4.388600 -4.059292 1.457132  
H -2.742895 -4.157587 -2.532400  
H -4.088650 -5.228654 -0.727505  
C -3.117028 1.105375 0.064596  
C -4.134231 0.926843 -0.888048  
C -3.131611 2.244228 0.886276  
C -5.144145 1.882650 -1.019980  
H -4.141872 0.036525 -1.521853  
C -4.140633 3.201586 0.747876  
H -2.354476 2.381514 1.644733  
C -5.147111 3.020896 -0.205587  
H -5.934428 1.737846 -1.760780  
H -4.145764 4.085123 1.390993  
H -5.940429 3.765202 -0.310290  
Cr 0.016021 -0.089902 2.105001

catalyst\_model\_A-02

Geometry with 53 atoms:

Total energy: -2731.335106320  
P -1.741603 -0.100682 0.247210  
P 1.741603 0.100682 0.247208  
C 0.682290 -0.353068 -1.228982  
C -0.682291 0.353068 -1.228981  
H 1.227561 -0.102185 -2.152352  
H 0.553015 -1.447907 -1.207900  
H -0.553016 1.447907 -1.207899  
H -1.227562 0.102185 -2.152351  
C -3.202784 0.997027 0.135849  
C -3.532008 1.744175 -1.008077

4TS9-10C

C -4.033341 1.076195 1.268633  
C -4.672947 2.553296 -1.014143  
H -2.910188 1.700874 -1.904163  
C -5.177627 1.875234 1.254452  
H -3.783018 0.504886 2.167949  
C -5.497759 2.617711 0.112382  
H -4.920192 3.131862 -1.907689  
H -5.818538 1.923239 2.138242  
H -6.389908 3.248618 0.102262  
C -2.352439 -1.777410 -0.203400  
C -3.533273 -1.979328 -0.937376  
C -1.581905 -2.890660 0.176398  
C -3.926766 -3.272987 -1.290850  
H -4.151320 -1.127754 -1.231351  
C -1.972891 -4.181890 -0.187662  
H -0.668287 -2.752479 0.763058  
C -3.147496 -4.374315 -0.921397  
H -4.849098 -3.421270 -1.857989  
H -1.363958 -5.039203 0.109907  
H -3.459269 -5.383960 -1.199846  
C 3.202785 -0.997027 0.135847  
C 4.033342 -1.076193 1.268631  
C 3.532009 -1.744175 -1.008078  
C 5.177628 -1.875232 1.254451  
H 3.783019 -0.504884 2.167947  
C 4.672948 -2.553296 -1.014144  
H 2.910189 -1.700874 -1.904164  
C 5.497761 -2.617710 0.112382  
H 5.818539 -1.923236 2.138241  
H 4.920193 -3.131862 -1.907690  
H 6.389909 -3.248618 0.102261  
C 2.352437 1.777410 -0.203400  
C 3.533272 1.979329 -0.937377  
C 1.581903 2.890660 0.176399  
C 3.926764 3.272989 -1.290850  
H 4.151319 1.127754 -1.231353  
C 1.972889 4.181890 -0.187660  
H 0.668286 2.752478 0.763059  
C 3.147493 4.374316 -0.921396  
H 4.849095 3.421273 -1.857989  
H 1.363955 5.039202 0.109910  
H 3.459266 5.383961 -1.199844  
Cr 0.000002 -0.000003 2.128065

catalyst\_model\_A-03

Geometry with 53 atoms:

Total energy: -2731.335323690

P 1.744777 0.039447 0.214292  
P -1.744799 -0.039517 0.214302  
C -0.662130 -0.389881 -1.268599  
C 0.662092 0.389742 -1.268617  
H -0.481092 -1.476686 -1.237551  
H -1.230141 -0.200074 -2.193324  
H 1.230098 0.199902 -2.193338  
H 0.481048 1.476548 -1.237612  
C 2.478208 -1.616020 -0.088832  
C 2.431297 -2.280779 -1.325468  
C 3.122071 -2.238349 0.996905  
C 3.018016 -3.542366 -1.470068  
H 1.943853 -1.823506 -2.188424  
C 3.717995 -3.491539 0.846373  
H 3.164218 -1.732363 1.966741  
C 3.663322 -4.147900 -0.388294  
H 2.973198 -4.051523 -2.435914  
H 4.222977 -3.959662 1.694887  
H 4.123024 -5.132188 -0.506108  
C 3.115946 1.239241 -0.007996  
C 4.296558 0.922132 -0.699283  
C 2.954162 2.528598 0.528387  
C 5.295437 1.887294 -0.856241  
H 4.440450 -0.078655 -1.113177  
C 3.950871 3.492586 0.360819  
H 2.044408 2.782445 1.081998  
C 5.124225 3.171693 -0.330147  
H 6.212795 1.633144 -1.393155  
H 3.815836 4.493568 0.778061  
H 5.908533 3.922542 -0.453835  
C -2.478119 1.616001 -0.088822  
C -3.121965 2.238359 0.996908  
C -2.431132 2.280773 -1.325447  
C -3.717804 3.491590 0.846377

H -3.164167 1.732364 1.966737  
C -3.017766 3.542400 -1.470046  
H -1.943692 1.823482 -2.188397  
C -3.663060 4.147962 -0.388280  
H -4.222775 3.959735 1.694885  
H -2.972890 4.051567 -2.435884  
H -4.122694 5.132281 -0.506094  
C -3.116043 -1.239225 -0.007987  
C -2.954339 -2.528592 0.528396  
C -4.296636 -0.922041 -0.699271  
C -3.951109 -3.492518 0.360830  
H -2.044599 -2.782497 1.082005  
C -5.295577 -1.887140 -0.856226  
H -4.440467 0.078755 -1.113162  
C -5.124445 -3.171550 -0.330133  
H -3.816137 -4.493507 0.778072  
H -6.212920 -1.632932 -1.393137  
H -5.908801 -3.922349 -0.453818  
Cr -0.000008 -0.000091 2.083300

catalyst\_model\_A-04

Geometry with 53 atoms:

Total energy: -2731.334835830

P 1.737470 -0.156069 0.249703  
P -1.754422 -0.054773 0.244822  
C -0.687438 -0.528133 -1.216118  
C 0.646551 0.232096 -1.227076  
H -0.522771 -1.617373 -1.161876  
H -1.238880 -0.322122 -2.147279  
H 1.203907 0.015711 -2.151413  
H 0.468721 1.319301 -1.217211  
C 2.548640 -1.737938 -0.205184  
C 3.140250 -1.939895 -1.466042  
C 2.571327 -2.781564 0.734716  
C 3.737882 -3.162848 -1.775641  
C 3.147768 -1.137334 -2.207883  
C 3.170483 -4.006055 0.423234  
H 2.121780 -2.636157 1.721806  
C 3.752657 -4.197425 -0.832487  
H 4.196572 -3.309365 -2.756656  
H 3.182861 -4.810298 1.162854  
H 4.221546 -5.153438 -1.078240  
C 3.031772 1.144900 0.146597  
C 4.403036 0.845715 0.100824  
C 2.627029 2.492802 0.199910  
C 5.348357 1.876791 0.088517  
H 4.740688 -0.192068 0.069842  
C 3.574200 3.517809 0.180116  
H 1.564984 2.751799 0.252802  
C 4.938746 3.212115 0.123686  
H 6.412467 1.631061 0.047660  
H 3.245829 4.559708 0.210863  
H 5.680306 4.014534 0.109609  
C -3.240815 -1.118513 0.117781  
C -4.107815 -1.139162 1.225680  
C -3.549095 -1.901045 -1.007863  
C -5.267627 -1.914915 1.203500  
H -3.873173 -0.541244 2.111897  
C -4.707265 -2.685530 -1.021909  
H -2.895692 -1.907160 -1.882375  
C -5.568095 -2.691794 0.078929  
H -5.936569 -1.918327 2.067667  
H -4.938296 -3.292100 -1.901094  
H -6.472698 -3.304554 0.063192  
C -2.326043 1.632159 -0.221554  
C -3.300883 1.832415 -1.213652  
C -1.740263 2.747646 0.399931  
C -3.673814 3.127635 -1.580020  
H -3.777517 0.975057 -1.696049  
C -2.110311 4.043587 0.027159  
H -0.994729 2.606437 1.189274  
C -3.077766 4.233898 -0.963522  
H -4.436358 3.274607 -2.348959  
H -1.648809 4.904196 0.517621  
H -3.373583 5.245688 -1.251444  
Cr -0.026094 -0.200102 2.122519

catalyst\_model\_B-01

Geometry with 61 atoms:

Total energy: -2960.241203040

P 1.713964 -0.154305 0.085174

P -1.713981 0.154217 0.085290  
C -0.706610 -0.299663 -1.425710  
C 0.706466 0.299464 -1.425761  
H -0.659237 -1.399052 -1.441324  
H -1.244528 0.029381 -2.328521  
H 1.244320 -0.029676 -2.328569  
H 0.659167 1.398859 -1.441448  
C 2.243595 -1.881467 -0.275762  
C 3.475493 -2.194531 -0.866651  
C 1.366101 -2.937267 0.070814  
C 3.835730 -3.520729 -1.123395  
H 4.163967 -1.388353 -1.130147  
C 1.721489 -4.266388 -0.190424  
C 2.955227 -4.549568 -0.786287  
H 4.798891 -3.745505 -1.586470  
H 1.049665 -5.084367 0.068776  
H 3.224179 -5.590143 -0.983995  
C 3.238742 0.851832 -0.063762  
C 3.626625 1.527230 -1.233523  
C 4.039374 0.967320 1.087707  
C 4.790553 2.303353 -1.245891  
H 3.030838 1.454314 -2.145135  
C 5.207779 1.731007 1.068529  
H 3.741899 0.454174 2.007492  
C 5.583070 2.405042 -0.099078  
H 5.081008 2.827046 -2.160151  
H 5.823244 1.806685 1.968381  
H 6.492716 3.010379 -0.113588  
C -2.243491 1.881392 -0.275807  
C -3.475264 2.194420 -0.866991  
C -1.366031 2.937206 0.070819  
C -3.835404 3.520589 -1.123994  
H -4.163713 1.388233 -1.130516  
C -1.721328 4.266307 -0.190704  
C -2.954927 4.549444 -0.786863  
H -4.798467 3.745330 -1.587291  
H -1.049506 5.084296 0.068471  
H -3.223789 5.590000 -0.984796  
C -3.238929 -0.851684 -0.063556  
C -3.626157 -1.528127 -1.232932  
C -4.040336 -0.965971 1.087498  
C -4.790207 -2.304073 -1.245352  
H -3.029762 -1.456182 -2.144216  
C -5.208851 -1.729482 1.068247  
H -3.743415 -0.451985 2.006994  
C -5.583502 -2.404545 -0.098979  
H -5.080149 -2.828543 -2.159331  
H -5.824946 -1.804195 1.967749  
H -6.493257 -3.009717 -0.113516  
O 0.185058 -2.576803 0.657834  
O -0.185126 2.576803 0.658097  
C -0.814711 -3.557713 0.904898  
H -1.677419 -3.020859 1.320524  
H -1.123756 -4.059653 -0.027404  
H -0.472045 -4.313284 1.632104  
C 0.814528 3.557734 0.905448  
H 0.471568 4.313425 1.632392  
H 1.677040 3.020947 1.321561  
H 1.124007 4.059526 -0.026794  
Cr 0.000338 -0.000273 1.954130

catalyst\_model\_B-02

Geometry with 61 atoms:

Total energy: -2960.236402670

P 2.015178 0.236903 0.179291  
P -1.388777 0.544138 -0.125320  
C -0.217914 0.360625 -1.577606  
C 1.163486 0.977324 -1.314569  
H -0.118419 -0.719925 -1.770520  
H -0.663464 0.816942 -2.475312  
H 1.802027 0.832337 -2.200526  
H 1.082483 2.062716 -1.135265  
C 2.304596 -1.502603 -0.373396  
C 3.406480 -1.850992 -1.169068  
C 1.386477 -2.515673 -0.009406  
C 3.600783 -3.163536 -1.604635  
H 4.126647 -1.078867 -1.449883  
C 1.574945 -3.832681 -0.447728  
C 2.680866 -4.148725 -1.242472  
H 4.465472 -3.412830 -2.223299  
H 0.871956 -4.618778 -0.174780

H 2.818502 -5.179996 -1.576390  
C 3.687633 0.986388 0.189465  
C 4.142061 1.903906 -0.772299  
C 4.541990 0.626753 1.248790  
C 5.429150 2.444876 -0.675797  
H 3.506095 2.204669 -1.606652  
C 5.828976 1.157921 1.333867  
H 4.196923 -0.080058 2.009578  
C 6.274982 2.071511 0.371369  
H 5.772081 3.158506 -1.429102  
H 6.485098 0.863634 2.156780  
H 7.280826 2.492837 0.440662  
C -2.756848 -0.608704 -0.523376  
C -2.995127 -1.116949 -1.808862  
C -3.596429 -1.026792 0.539067  
C -4.037286 -2.017343 -2.050947  
H -2.366072 -0.803895 -2.643866  
C -4.645435 -1.924849 0.297940  
C -4.859069 -2.413503 -0.994809  
H -4.207859 -2.398487 -3.059922  
H -5.297614 -2.249653 1.108336  
H -5.681017 -3.111860 -1.170921  
C -2.078464 2.232716 -0.358125  
C -3.225784 2.493494 -1.125497  
C -1.399180 3.305793 0.245662  
C -3.678059 3.805887 -1.288854  
H -3.771730 1.671365 -1.594266  
C -1.846793 4.617904 0.070444  
H -0.516814 3.113978 0.864527  
C -2.989184 4.869270 -0.695977  
H -4.574765 3.999047 -1.883163  
H -1.308480 5.444042 0.541785  
H -3.346605 5.893743 -0.826086  
O 0.321054 -2.145364 0.777599  
O -3.301671 -0.527000 1.767302  
O 0.722510 -3.084879 1.040647  
H -1.481743 -2.541362 1.617107  
H -1.177158 -3.446919 0.104891  
H -0.353750 -3.937684 1.633967  
C -4.150970 -0.807784 2.869554  
H -4.164049 -1.884788 3.112535  
H -3.739399 -0.254231 3.724615  
H -5.182591 -0.463457 2.684216  
Cr 0.127171 0.094007 1.875495

#### catalyst\_model\_B-03

Geometry with 61 atoms:

Total energy: -2960.235541180

P -1.955924 0.364858 -0.198369  
P 1.482850 0.071119 -0.396759  
C 0.491832 0.042675 1.195176  
C -0.765737 0.919442 1.132855  
H 0.217204 -1.005470 1.391754  
H 1.149756 0.364956 2.013977  
H -1.279997 0.906423 2.107373  
H -0.496548 1.965387 0.910521  
C -2.526571 -1.267966 0.447989  
C -3.490516 -1.352942 1.464689  
C -1.988692 -2.466707 -0.075544  
C -3.919912 -2.586295 1.957742  
H -3.919169 -0.432742 1.869181  
C -2.420682 -3.707269 0.412771  
C -3.381833 -3.759480 1.426351  
H -4.671814 -2.628978 2.748552  
H -2.018990 -4.637047 0.012412  
H -3.709920 -4.733297 1.797824  
C -3.423599 1.446631 -0.011638  
C -4.555467 1.144841 -0.793057  
C -3.452539 2.576452 0.822084  
C -5.696034 1.944645 -0.727613  
H -4.547544 0.270879 -1.451322  
C -4.595153 3.383201 0.875488  
H -2.592343 2.841076 1.439335  
C -5.717871 3.069010 0.106590  
H -6.570900 1.692555 -1.332167  
H -4.605893 4.259359 1.528681  
H -6.609546 3.698812 0.154174  
C 2.346909 1.686290 -0.360023  
C 2.143029 2.579512 -1.422698  
C 3.198657 2.077700 0.706077  
C 2.753890 3.835517 -1.449994

H 1.492480 2.277888 -2.249698  
C 3.818604 3.336495 0.677239  
C 3.590374 4.204322 -0.395024  
H 2.581028 4.515145 -2.286873  
H 4.476330 3.648829 1.487978  
H 4.078952 5.181977 -0.399637  
C 2.768103 -1.217030 -0.147557  
C 2.398739 -2.492774 0.314676  
C 4.105410 -0.987630 -0.512207  
C 3.350951 -3.509733 0.426706  
H 1.365033 -2.702223 0.599153  
C 5.053351 -2.007908 -0.402630  
H 4.413682 -0.004710 -0.876157  
C 4.681200 -3.271102 0.068410  
H 3.050919 -4.492842 0.798840  
H 6.091469 -1.812153 -0.683230  
H 5.425496 -4.066278 0.156682  
O -1.034739 -2.355813 -1.061614  
O 3.361529 1.182044 1.703494  
C -0.477003 -3.540779 -1.632689  
H 0.283084 -3.208290 -2.352053  
H 0.014115 -4.165781 -0.870515  
H -1.246777 -4.130251 -2.157609  
C 4.287083 1.434642 2.749086  
H 3.999201 2.318393 3.344485  
H 4.269328 0.546472 3.394347  
H 5.309412 1.573248 2.357496  
Cr -0.371891 -0.178058 -2.115881

#### catalyst\_model\_B-04

Geometry with 61 atoms:

Total energy: -2960.236792510

P 1.650736 0.157654 -0.177891  
P -1.650534 -0.157380 -0.178259  
C -0.655388 -0.396291 -1.748445  
C 0.655775 0.396720 -1.748252  
H -0.447627 -1.475561 -1.822180  
H -1.268367 -0.123459 -2.622099  
H 1.268954 0.123980 -2.621787  
H 0.448050 1.476001 -1.821936  
C 2.106317 -1.625916 -0.280284  
C 2.766036 -2.139963 -1.409044  
C 1.758695 -2.519905 0.759999  
C 3.082974 -3.493980 -1.518253  
H 3.047224 -1.456294 -2.214014  
C 2.072134 -3.881994 0.654152  
C 2.732291 -4.359833 -0.480625  
H 3.600350 -3.868594 -2.403895  
H 1.807449 -4.581208 1.445513  
H 2.970773 -5.424096 -0.547143  
C 3.195148 1.090317 -0.515872  
C 4.472335 0.540337 -0.310960  
C 3.089007 2.444303 -0.889685  
C 5.616470 1.321907 -0.498949  
H 4.580458 -0.503494 -0.009047  
C 4.235088 3.218141 -1.082525  
H 2.107193 2.905684 -1.030132  
C 5.502986 2.658984 -0.889622  
H 6.603222 0.878721 -0.342173  
H 4.137002 4.264418 -1.383109  
H 6.399274 3.265468 -1.040638  
C -2.106457 1.626080 -0.280549  
C -2.766187 2.140066 -1.409327  
C -1.759179 2.520056 0.759870  
C -3.083568 3.493991 -1.518400  
H -3.047013 1.456420 -2.214442  
C -2.073115 3.882042 0.654184  
C -2.733334 4.359805 -0.480594  
H -3.600933 3.868548 -2.404072  
H -1.808802 4.581262 1.445661  
H -2.972210 5.423990 -0.546695  
C -3.194747 -1.090421 -0.516098  
C -3.088298 -2.444438 -0.889710  
C -4.472059 -0.540723 -0.311239  
C 4.234200 -3.218585 -1.082380  
H -2.106401 -2.905631 -1.030177  
C -5.616016 -1.322598 -0.499070  
H -4.580441 0.503128 -0.009492  
C -5.502232 -2.659712 -0.889522  
H -4.135859 -4.264888 -1.382791  
H -6.602864 -0.879607 -0.342344

H -6.398376 -3.266444 -1.040388  
O 1.097663 -2.013247 1.863544  
O -1.098051 2.013461 1.863396  
C 0.840159 -2.877490 2.978409  
H 0.390816 -2.250183 3.759259  
H 0.132465 -3.677108 2.706133  
H 1.775618 -3.313905 3.362704  
C -0.840204 2.877842 2.978081  
H -1.775590 3.314000 3.362852  
H -0.390212 2.250716 3.758698  
H -0.132897 3.677660 2.705387  
Cr -0.000157 0.000091 1.774900

#### catalyst\_model\_B-05

Geometry with 61 atoms:

Total energy: -2960.234203470

P -1.450276 0.529768 -0.390738  
P 2.007297 0.143767 -0.219232  
C 0.909479 0.746807 1.169198  
C -0.491514 0.116894 1.163549  
H 1.402532 0.537111 2.131958  
H 0.836436 1.842667 1.063933  
H -0.436980 -0.980745 1.224087  
H -1.056911 0.462122 2.038186  
C -2.942493 -0.544397 -0.425012  
C -3.396521 -0.916345 -1.701309  
C -3.650703 -1.021694 0.705943  
C -4.507283 -1.743690 -1.878410  
H -2.857594 -0.544437 -2.578100  
C -4.755798 -1.870678 0.531939  
C -5.177006 -2.224969 -0.752310  
H -4.840878 -2.011698 -2.882993  
H -5.300193 -2.250912 1.395758  
H -6.042688 -2.882210 -0.866137  
C -2.034542 2.244941 -0.071029  
C -2.931653 2.553095 0.968602  
C -1.544169 3.281822 -0.881593  
C -3.323602 3.874993 1.187582  
H -3.320610 1.756642 1.605680  
C -1.933636 4.606020 -0.655555  
H -0.852667 3.054243 -1.689782  
C -2.824762 4.903174 0.378601  
H -4.023099 4.105870 1.995058  
H -1.543645 5.404543 -1.291619  
H -3.134063 5.936506 0.554426  
C 2.387661 -1.583503 0.302720  
C 3.503021 -1.896627 1.092983  
C 1.524287 -2.629580 -0.099922  
C 3.765012 -3.211543 1.485888  
H 4.179254 -1.097172 1.404194  
C 1.781000 -3.948332 0.297477  
C 2.900186 -4.231258 1.086866  
H 4.639295 -3.434835 2.100996  
H 1.120445 -4.760854 -0.002705  
H 3.091267 -5.264273 1.387580  
C 3.589324 1.042179 -0.002947  
C 4.575567 0.845269 -0.987627  
C 3.857047 1.914292 1.065195  
C 5.808218 1.492418 -0.897650  
H 4.377899 0.173915 -1.828688  
C 5.089693 2.571722 1.145182  
H 3.115800 2.088656 1.846991  
C 6.066814 2.360922 0.169225  
H 6.567658 1.324451 -1.665315  
H 5.286366 3.249145 1.979893  
H 7.029108 2.874129 0.237276  
O -3.213337 -0.616812 1.922220  
O 0.448637 -2.281552 -0.876410  
C -3.848024 -1.082342 3.103548  
H -3.306403 -0.624541 3.942051  
H -4.906179 -0.772197 3.147196  
H -3.784788 -2.180657 3.192656  
C -0.530504 -3.267277 -1.194015  
H -0.988556 -3.682925 -0.281101  
H -1.308268 -2.758238 -1.775798  
H -0.100668 -4.084007 -1.797495  
Cr 0.363743 0.137904 -2.151616

#### catalyst\_model\_B-06

Geometry with 61 atoms:

Total energy: -2960.233647190



H 5.499160 3.987682 -0.147575  
H 7.372329 2.403309 -0.604283  
O -2.502055 -1.087726 -1.845137  
O 0.600420 -2.080323 -1.045733  
C -3.148500 -1.661384 -2.973161  
H -2.793323 -1.102168 -3.849684  
H -2.892337 -2.726996 -3.101405  
H -4.244265 -1.557917 -2.902039  
C -0.052274 -3.188181 -1.661958  
H -0.865075 -3.577874 -1.028656  
H -0.476668 -2.811578 -2.600789  
H 0.663700 -3.994046 -1.891965  
Cr 0.102876 0.275995 -1.881008

catalyst\_model\_B-10

Geometry with 61 atoms:

Total energy: -2960.234366340  
P -1.437509 0.539218 0.125354  
P 1.975791 0.184522 -0.151701  
C 1.095851 0.886593 1.345696  
C -0.294188 0.269970 1.575392  
H 1.721833 0.725880 2.237482  
H 1.017503 1.974918 1.183562  
H -0.222458 -0.821634 1.702480  
H -0.725198 0.666584 2.506918  
C -2.884642 -0.532024 0.502036  
C -3.401537 -0.655842 1.800124  
C -3.513817 -1.238599 -0.551672  
C -4.512280 -1.458980 2.067095  
H -2.933793 -0.108443 2.621402  
C -4.633408 -2.041549 -0.286845  
C -5.124929 -2.145782 1.017182  
H -4.899379 -1.540638 3.084896  
H -5.128459 -2.587406 -1.089662  
H -5.999479 -2.772730 1.207943  
C -2.068802 2.258502 0.320147  
C -2.269000 2.881700 1.563683  
C -2.378299 2.966534 -0.853688  
C -2.767262 4.185595 1.627522  
H -2.039212 2.357753 2.494236  
C -2.885061 4.267046 -0.788634  
H -2.225080 2.491440 -1.827519  
C -3.077429 4.879639 0.453198  
H -2.915752 4.661658 2.600047  
H -3.125105 4.804931 -1.709225  
H -3.467137 5.899153 0.506977  
C 2.461725 -1.496803 0.432449  
C 3.683377 -1.746262 1.074134  
C 1.570644 -2.575723 0.224340  
C 4.019509 -3.029109 1.514536  
H 4.384914 -0.923358 1.228676  
C 1.900902 -3.861685 0.670839  
C 3.123651 -4.080025 1.313627  
H 4.975577 -3.203311 2.012753  
H 1.217206 -4.696821 0.522622  
H 3.371899 -5.087654 1.655943  
C 3.555916 1.108095 -0.237763  
C 4.313458 0.964417 -1.414541  
C 4.040640 1.936334 0.788675  
C 5.537360 1.619850 -1.556374  
H 3.941257 0.331240 -2.225721  
C 5.261358 2.602691 0.637782  
H 3.478947 2.068797 1.715145  
C 6.012571 2.443577 -0.529815  
H 6.118522 1.494018 -2.473228  
H 5.627851 3.246421 1.441318  
H 6.966892 2.963868 -0.642414  
O -2.968098 -1.113630 -1.795549  
O 0.397247 -2.287794 -0.422134  
C -3.615114 -1.705548 -2.911835  
H -3.021631 -1.427890 -3.793990  
H -3.645417 -2.806282 -2.833822  
H -4.641618 -1.321006 -3.036316  
C -0.584587 -3.306376 -0.590564  
H -0.955315 -3.668853 0.382406  
H -1.409042 -2.838074 -1.139764  
H -0.191508 -4.153986 -1.176599  
Cr 0.075671 0.010388 -1.844175

catalyst\_model\_B-11

Geometry with 61 atoms:

Total energy: -2960.234500250  
P -1.393959 0.794877 0.123701  
P 1.980031 0.503898 -0.214292  
C 1.177834 1.526101 1.140264  
C -0.194231 0.970788 1.556790  
H 1.849505 1.557731 2.013462  
H 1.089969 2.554814 0.753929  
H -0.067413 -0.036182 1.982715  
H -0.638716 1.602626 2.341186  
C -2.372371 -0.709463 0.518959  
C -2.684206 -1.081588 1.834841  
C -2.828925 -1.523303 -0.544589  
C -3.419230 -2.237626 2.106647  
H -2.355872 -0.451400 2.664988  
C -3.571575 -2.682255 -0.275900  
C -3.859050 -3.032766 1.046746  
H -3.652418 -2.509456 3.138204  
H -3.930669 -3.315117 -1.087252  
H -4.439056 -3.937795 1.243707  
C -2.587723 2.175408 0.329626  
C -2.127231 3.458898 0.674556  
C -3.952690 1.992865 0.047825  
C -3.017732 4.533084 0.749637  
H -1.069446 3.629473 0.893363  
C -4.838195 3.071248 0.120689  
H -4.332245 1.003262 -0.217680  
C -4.375212 4.343098 0.472015  
H -2.647984 5.523457 1.027212  
H -5.898609 2.913782 -0.092561  
H -5.070717 5.183802 0.530835  
C -2.102046 -1.143349 0.604187  
C 2.882522 -1.308250 1.759868  
C 1.363366 -2.247566 0.119675  
C 2.930970 -2.526837 2.436897  
H 3.470134 -0.463033 2.127932  
C 1.403646 -3.472505 0.802850  
C 2.183032 -3.603521 1.954523  
H 3.545407 -2.634414 3.333161  
H 0.827830 -4.327397 0.450910  
H 2.202807 -4.563419 2.476296  
C 3.712804 1.103688 -0.266588  
C 4.055505 2.420866 0.084459  
C 4.713081 2.486440 -0.766292  
C 5.373658 2.868272 -0.053845  
H 3.302756 3.111255 0.470740  
C 6.027587 0.698552 -0.897474  
H 4.465953 -0.779998 -1.042953  
C 6.362183 2.010520 -0.542629  
H 5.627011 3.893673 0.227045  
H 6.795744 0.020587 -1.278064  
H 7.391552 2.361949 -0.646593  
O -2.506166 -1.124538 -1.810851  
O 0.618707 -2.067334 -1.019272  
C -3.112958 -1.763920 -2.925258  
H -2.783287 -1.210341 -3.815287  
H -2.796680 -2.816907 -3.020455  
H -4.213285 -1.720286 -2.863745  
C -0.014341 -3.194058 -1.620841  
H -0.821455 -3.588807 -0.983571  
H -0.443098 -2.837894 -2.565648  
H 0.715238 -3.991058 -1.838660  
Cr 0.091261 0.271263 -1.876216

catalyst\_model\_B-12

Geometry with 61 atoms:

Total energy: -2960.233672790  
P -1.912406 -0.429344 0.061813  
P 1.547711 -0.214928 -0.173600  
C 0.424808 -0.894827 -1.511376  
C -0.941665 -0.189363 -1.521507  
H 0.916746 -0.792980 -2.491688  
H 0.298971 -1.971292 -1.310099  
H -0.819155 0.898901 -1.632851  
H -1.546579 -0.512718 -2.383018  
C -3.153581 0.920634 -0.017385  
C -4.428391 0.756751 -0.576907  
C -2.805396 2.177529 0.533402  
C -5.346989 1.809536 -0.597344  
H -4.708331 -0.212569 -0.995644  
C -3.724134 3.233594 0.515327  
C -4.989064 3.042887 -0.051536

H -6.335752 1.664399 -1.037646  
H -3.469699 4.204797 0.938255  
H -5.698380 3.874102 -0.059713  
C -2.866894 -1.979507 -0.159017  
C -2.789319 -2.789791 -1.303617  
C -3.674304 -2.395750 0.916918  
C -3.512309 -3.986008 -1.372632  
H -2.169333 -2.500817 -2.154345  
C -4.405708 -3.581045 0.838566  
H -3.735691 -1.782622 1.821139  
C -4.323867 -4.381716 -0.307057  
H -3.441944 -4.607567 -2.268787  
H -5.036775 -3.886048 1.677053  
H -4.889985 -5.314499 -0.365589  
C 2.970910 -1.362904 -0.124648  
C 3.128849 -2.468784 -0.971307  
C 3.957428 -1.110041 0.861655  
C 4.235436 -3.315652 -0.850270  
H 2.389600 -2.676804 -1.746556  
C 5.069477 -1.954010 0.980255  
C 5.199181 -3.052844 0.124096  
H 4.343765 -4.170949 -1.520453  
H 5.835618 -1.763567 1.731640  
H 6.069998 -3.705518 0.223803  
C 2.212174 1.328760 -0.930429  
C 3.464170 1.385687 -1.563437  
C 1.425445 2.492702 -0.864761  
C 3.917008 2.585421 -2.120245  
H 4.091912 0.493489 -1.620818  
C 1.875376 3.686716 -1.434328  
H 0.454013 2.465504 -0.365831  
C 3.124993 3.736561 -2.060082  
H 4.895219 2.619464 -2.606598  
H 1.250955 4.582521 -1.383366  
H 3.482302 4.671607 -2.498462  
O -1.544922 2.290719 1.069103  
O 3.742606 -0.018433 1.636226  
C -1.136175 3.533953 1.633551  
H -0.104815 3.390639 1.982990  
H -1.148739 4.340862 0.882186  
H -1.772334 3.817320 2.488804  
C 4.717436 0.379279 2.586432  
H 5.686081 0.599347 2.105446  
H 4.336708 1.297285 3.054352  
H 4.864431 -0.387362 3.367429  
Cr -0.079135 0.050178 1.762026

catalyst\_model\_B-13

Geometry with 61 atoms:

Total energy: -2960.232765090  
P 1.593595 -0.335726 -0.394222  
P -1.837917 -0.580701 -0.030161  
C -0.600497 -0.512868 1.384914  
C 0.744795 -1.175399 1.052431  
H -0.453618 0.555095 1.610053  
H -1.045827 -0.964661 2.285365  
H 1.421877 -1.144183 1.917586  
H 0.611539 -2.232586 0.771780  
C 2.124884 1.279416 0.292583  
C 1.655376 2.450982 -0.320693  
C 2.952480 1.395809 1.439515  
C 1.989828 3.716424 0.166674  
H 1.010549 2.363362 -1.199581  
C 3.297295 2.666698 1.925328  
C 2.813669 3.813931 1.289577  
H 1.614042 4.615113 -0.326734  
H 3.936599 2.768166 2.801892  
H 3.088597 4.795314 1.684338  
C 3.100783 -1.339724 -0.690656  
C 2.945850 -2.709749 -0.969440  
C 4.383926 -0.772914 -0.750351  
C 4.055670 -3.500953 -1.275122  
H 1.952965 -3.169621 -0.952232  
C 5.490720 -1.566087 -1.064760  
H 4.525288 0.290977 -0.550008  
C 5.332043 -2.931011 -1.323145  
H 3.921560 -4.565824 -1.481710  
H 6.484666 -1.113240 -1.105416  
H 6.200150 -3.548501 -1.566462  
C -2.745818 1.011427 0.124614  
C -3.607225 1.257369 1.206092





C -5.393758 2.817328 -0.236175  
H -4.451993 3.759538 -1.942344  
H -6.114525 1.701592 1.464365  
H -6.265337 3.476510 -0.248530  
C -2.397571 -1.686129 -0.492816  
C -3.565442 -1.848766 -1.255611  
C -1.683803 -2.824808 -0.082342  
C -4.005691 -3.128709 -1.602352  
H -4.136719 -0.974260 -1.576574  
C -2.120200 -4.103932 -0.439478  
H -0.778428 -2.717120 0.523478  
C -3.283941 -4.257324 -1.198719  
H -4.918305 -3.245380 -2.192356  
H -1.554465 -4.981723 -0.117179  
H -3.631451 -5.256561 -1.472573  
C 3.164503 -1.110958 -0.197627  
C 3.274086 -2.123018 -1.161710  
C 4.197049 -0.966224 0.762579  
C 4.381271 -2.977888 -1.183024  
H 2.496326 -2.250805 -1.916362  
C 5.311467 -1.814446 0.735996  
C 5.393713 -2.817379 -0.236174  
H 4.451976 -3.759497 -1.942410  
H 6.114442 -1.701746 1.464450  
H 6.265272 -3.476589 -0.248523  
C 2.397596 1.686168 -0.492862  
C 1.684053 2.824862 -0.082034  
C 3.565280 1.848805 -1.255946  
C 2.120454 4.103992 -0.439143  
H 0.778867 2.717176 0.524068  
C 4.005530 3.128752 -1.602672  
H 4.136398 0.974292 -1.577171  
C 3.283983 4.257378 -1.198709  
H 1.554894 4.981793 -0.116565  
H 4.917986 3.245417 -2.192921  
H 3.631497 5.256620 -1.472543  
O -4.016509 -0.031451 1.660332  
O 4.016458 0.031327 1.660433  
C -5.040134 -0.343637 2.591139  
H -4.680204 -1.206252 3.167974  
H -5.234817 0.495588 3.281703  
H -5.978715 -0.620965 2.081239  
C 5.040047 0.343421 2.591309  
H 5.978662 0.620746 2.081471  
H 4.680120 1.206014 3.168179  
H 5.234667 -0.495852 3.281834  
Cr 0.000010 0.000058 1.832157

## <sup>2</sup>A

Geometry with 65 atoms:

Total energy: -2889.242703790

Cr 0.115724 -0.628032 1.480595  
P 1.567493 -0.083295 -0.334068  
P -1.583866 -0.246238 -0.238486  
C -0.714950 0.037393 -1.878307  
C 0.690624 -0.569593 -1.902595  
H -1.336381 -0.346991 -2.700027  
H -0.652771 1.129624 -1.998997  
H 0.648558 -1.667931 -1.941975  
H 1.260366 -0.223102 -2.779030  
C 3.186961 -0.924500 -0.354980  
C 3.331601 -2.191547 -0.946158  
C 4.279590 -0.352322 0.322122  
C 4.551475 -2.869241 -0.868745  
H 2.498381 -2.662376 -1.471650  
C 5.496357 -1.033469 0.393880  
H 4.186055 0.632575 0.784301  
C 5.634924 -2.292538 -0.199992  
H 4.654189 -3.851518 -1.336099  
H 6.340994 -0.576833 0.915312  
H 6.588114 -2.823470 -0.142687  
C 1.886328 1.702037 -0.610144  
C 2.911059 2.143160 -1.465449  
C 1.024828 2.646244 -0.026083  
C 3.071249 3.506859 -1.721850  
H 3.590848 1.423306 -1.927646  
C 1.182370 4.009122 -0.291475  
H 0.213125 2.325818 0.631946  
C 2.208117 4.440626 -1.137194  
H 3.873932 3.842258 -2.383084  
H 0.501910 4.731649 0.165194

H 2.336887 5.506324 -1.341661  
C -2.895705 -1.484523 -0.574561  
C -4.109284 -1.431545 0.132284  
C -2.661662 -2.551382 -1.458668  
C -5.073342 -2.426496 -0.049950  
H -4.312736 -0.606030 0.818811  
C -3.630639 -3.541571 -1.640278  
H -1.723171 -2.618907 -2.014234  
C -4.837024 -3.482300 -0.935768  
H -6.016316 -2.372218 0.499602  
H -3.440920 -4.363009 -2.335462  
H -5.593430 -4.257784 -1.078471  
C -2.513994 1.314720 0.053662  
C -3.177034 1.984995 -0.989537  
C -2.556026 1.856521 1.349233  
C -3.851428 3.181538 -0.739717  
H -3.170860 1.573796 -2.002171  
C -3.236300 3.052953 1.599055  
H -2.060516 1.346248 2.180379  
C -3.879999 3.718563 0.552977  
H -4.361156 3.697091 -1.557247  
H -3.262229 3.462719 2.611621  
H -4.409373 4.655181 0.744251  
C -0.204099 -2.680035 0.893357  
C 0.802725 -2.547622 1.862604  
H -1.214991 -2.986860 1.185706  
H 0.045281 -2.927326 -0.142997  
H 1.860223 -2.623139 1.587572  
H 0.587527 -2.768240 2.915142  
C 0.541037 0.129570 3.388046  
C 1.713502 0.373757 2.659287  
H -0.156136 0.967534 3.539981  
H 0.443646 -0.691487 4.107014  
H 2.562295 -0.345734 2.750345  
H 1.959307 1.334365 2.279958

## <sup>2</sup>Ts2-3A

Geometry with 65 atoms:

Total energy: -2889.200667870

Cr 0.056011 -0.525330 1.406713  
P 1.560425 -0.127366 -0.423729  
P -1.483389 -0.168404 -0.421048  
C -0.625617 0.169489 -2.053426  
C 0.745374 -0.506945 -2.057226  
H -1.255983 -0.163691 -2.890986  
H -0.515650 1.262474 -2.131893  
H 0.649582 -1.600197 -2.147654  
H 1.378879 -0.156823 -2.886704  
C 3.057044 -1.186005 -0.367531  
C 2.933852 -2.555233 -0.667292  
C 4.287949 -0.698222 0.104297  
C 4.026871 -3.413012 -0.520232  
H 1.982597 -2.967354 -1.014619  
C 5.378002 -1.560558 0.250326  
H 4.401006 0.357199 0.359207  
C 5.251808 -2.917247 -0.063039  
H 3.919886 -4.472998 -0.763464  
H 6.331394 -1.167793 0.612053  
H 6.106286 -3.588624 0.050856  
C 2.122670 1.600947 -0.685212  
C 3.150611 1.915701 -1.592023  
C 1.434973 2.641242 -0.040794  
C 3.489459 3.248745 -1.833189  
H 3.693661 1.119454 -2.106985  
C 1.770133 3.975331 -0.289767  
H 0.620765 2.414212 0.651367  
C 2.800927 4.279586 -1.182715  
H 4.294128 3.484803 -2.533785  
H 1.223879 4.775607 0.215107  
H 3.068512 5.321523 -1.374826  
C -2.764949 -1.417031 -0.825585  
C -4.071805 -1.322520 -0.320617  
C -2.398197 -2.548408 -1.576403  
C -4.998375 -2.338403 -0.575176  
H -4.374713 -0.450897 0.263373  
C -3.327981 -3.558868 -1.830417  
H -1.382852 -2.647979 -1.969887  
C -4.630265 -3.455921 -1.329259  
H -6.014720 -2.252293 -0.183066  
H -3.034861 -4.429900 -2.421740  
H -5.357190 -4.247090 -1.527914

C -2.390703 1.380308 -0.050047  
C -3.222020 1.994858 -1.002001  
C -2.201651 1.997659 1.197412  
C -3.848445 3.207567 -0.706919  
H -3.383349 1.523245 -1.974870  
C -2.826420 3.213272 1.490940  
H -1.571850 1.524935 1.960704  
C -3.650731 3.817758 0.537455  
H -4.494977 3.679176 -1.450913  
H -2.673348 3.684693 2.464608  
H -4.143746 4.766071 0.764753  
C -1.619673 -1.390511 2.213999  
C -0.763086 -1.404767 3.383711  
H -2.558857 -0.826168 2.266707  
H -1.739774 -2.343402 1.678106  
H -0.281925 -2.367375 3.595705  
H -1.190938 -0.972313 4.294002  
C 1.726790 0.001603 2.490499  
C 0.790104 -0.232720 3.574549  
H 2.586246 -0.676744 2.420386  
H 1.997821 1.045117 2.282734  
H 0.314973 0.670056 3.980740  
H 1.145405 -0.878639 4.383532

## <sup>2</sup>A

Geometry with 65 atoms:

Total energy: -2889.288231630

Cr 0.050982 -0.512019 1.486131  
P 1.627646 0.091271 -0.368747  
P -1.520174 -0.085050 -0.345699  
C -0.645267 0.318420 -1.958154  
C 0.794295 -0.201311 -2.005759  
H -1.241568 -0.043680 -2.810402  
H -0.647454 1.418704 -2.420365  
H 0.834114 -1.285835 -2.188728  
H 1.369134 0.278936 -2.812404  
C 3.306507 -0.619291 -0.541284  
C 3.444554 -1.954473 -0.966174  
C 4.449647 0.092849 -0.139697  
C 4.703631 -2.557235 -1.003937  
H 2.570102 -2.535635 -1.271259  
C 5.707071 -0.517323 -0.175622  
H 4.364173 1.127511 0.199389  
C 5.837553 -1.840266 -0.607594  
H 4.798777 -3.591973 -1.341923  
H 6.589614 0.047550 0.134569  
H 6.821937 -2.313472 -0.634982  
C 1.827392 1.910549 -0.286089  
C 2.344769 2.664744 -1.353458  
C 1.420440 2.568855 0.886991  
C 2.444829 4.053441 -1.244575  
H 2.677893 2.170457 -2.269805  
C 1.521702 3.958597 0.995342  
H 1.019145 1.986368 1.724700  
C 2.032678 4.700713 -0.073220  
H 2.848094 4.634993 -2.077062  
H 1.202278 4.460126 0.911933  
H 2.112737 5.787569 0.060694  
C -2.356855 -1.696195 -0.629638  
C -3.491866 -2.037572 0.130350  
C -1.826991 -2.645946 -1.521012  
C -4.081726 -3.295839 -0.004581  
H -3.930746 -1.311108 0.817437  
C -2.417423 -3.907140 -1.648074  
H -0.954724 -2.412851 -2.133461  
C -3.544157 -4.236113 -0.890232  
H -4.969227 -3.541410 0.583767  
H -1.996786 -4.632009 -2.349425  
H -4.006972 -5.220426 -0.993693  
C -2.833495 1.191878 -0.309113  
C -4.043633 1.054863 -1.009494  
C -2.565748 2.387137 0.379976  
C -4.974573 2.097228 -1.007987  
H -4.265889 0.134991 -1.555082  
C -3.495576 3.429579 0.371512  
H -1.622716 2.507752 0.920014  
C -4.703176 3.283574 -0.318664  
H -5.915922 1.982013 -1.550931  
H -3.278299 4.355669 0.909354  
H -5.434398 4.095694 -0.319456  
C 1.018707 -2.783639 1.729955

C 1.955406 -2.105477 2.425604  
H 0.143190 -3.224714 2.218204  
H 1.162298 -3.021652 0.670456  
H 2.875097 -1.757016 1.945629  
H 1.870082 -1.953066 3.504947  
C -1.719625 -0.256405 2.714964  
C -0.567940 -0.482648 3.498321  
H -2.145846 0.747527 2.620407  
H -2.445581 -1.065142 2.579929  
H -0.422724 -1.446978 3.998419  
H -0.062258 0.362917 3.988344

<sup>4</sup>TS2-3A

Geometry with 65 atoms:  
Total energy: -2889.278236010  
Cr 0.068313 -0.661032 1.471639  
P 1.635181 -0.154279 -0.385442  
P -1.501513 -0.183368 -0.417460  
C -0.580648 0.122052 -0.202441  
C 0.793038 -0.555526 -1.998993  
H -1.185407 -0.225135 -2.873153  
H -0.466926 1.213018 -2.116577  
H 0.691719 -1.651021 -2.057711  
H 1.419338 -0.231415 -2.844978  
C 3.241370 -1.028112 -0.426810  
C 3.391872 -2.242610 -1.118690  
C 4.324845 -0.523804 0.316518  
C 4.606592 -2.933323 -1.074123  
H 2.569536 -2.660862 -1.703040  
C 5.535927 -1.217278 0.355528  
H 4.227238 0.419585 0.857817  
C 5.679810 -2.423361 -0.338595  
H 4.713407 -3.873032 -1.621452  
H 6.372156 -0.811518 0.930021  
H 6.628867 -2.963861 -0.307733  
C 2.009314 1.632851 -0.563999  
C 3.052135 2.083209 -1.392652  
C 1.179042 2.572437 0.069252  
C 3.258804 3.452154 -1.576427  
H 3.710400 1.365868 -1.888790  
C 1.383059 3.941420 -0.124253  
H 0.359206 2.241460 0.711030  
C 2.424827 4.382201 -0.945018  
H 4.075069 3.794849 -2.216995  
H 0.726889 4.661897 0.369808  
H 2.589968 5.452282 -1.092778  
C -2.740229 -1.469916 -0.828169  
C -4.063939 -1.375736 -0.369879  
C -2.334505 -2.617665 -1.532179  
C -4.969235 -2.410674 -0.623242  
H -4.396239 -0.490634 0.176778  
C -3.244030 -3.646799 -1.785265  
H -1.306329 -2.716952 -1.890316  
C -4.563122 -3.545814 -1.330069  
H -5.998811 -2.325646 -0.267147  
H -2.921229 -4.531430 -2.339714  
H -5.273465 -4.352199 -1.527434  
C -2.457639 1.350980 -0.122899  
C -3.124452 2.001177 -1.176438  
C -2.509730 1.901612 1.168175  
C -3.822980 3.186312 -0.938430  
H -3.101662 1.582502 -2.185657  
C -3.212017 3.087468 1.403852  
H -2.004084 1.402467 1.998971  
C -3.866741 3.731176 0.350313  
H -4.337961 3.686669 -1.762048  
H -3.247424 3.506749 2.412173  
H -4.414920 4.658697 0.532758  
C -1.577646 -1.660931 2.215350  
C -0.746975 -1.673301 3.407457  
H -2.535152 -1.128469 2.270357  
H -1.652049 -2.592444 1.637894  
H -0.204586 -2.610622 3.581530  
H -1.224492 -1.319515 4.326768  
C 1.672699 -0.071589 2.640962  
C 0.728636 -0.419962 3.691168  
H 2.571310 -0.695601 2.558324  
H 1.873775 0.994618 2.475973  
H 0.179055 0.429488 4.116560  
H 1.109782 -1.072202 4.482941

<sup>6</sup>2A

Geometry with 65 atoms:  
Total energy: -2889.321313180  
Cr 0.009004 -0.215780 1.620061  
P 1.699212 0.055824 -0.264569  
P -1.673829 -0.031764 -0.285742  
C -0.652796 0.416093 -1.782615  
C 0.709454 -0.290584 -1.812111  
H -1.225171 0.217823 -2.702520  
H -0.523279 1.508993 -1.729322  
H 0.583917 -1.384411 -1.864569  
H 1.281702 0.025548 -2.698481  
C 3.161296 -1.039755 -0.368103  
C 3.541166 -1.728503 -1.532262  
C 3.935951 -1.184639 0.797890  
C 4.674956 -2.547775 -1.525593  
H 2.964937 -1.630600 -2.454177  
C 5.072762 -1.994859 0.797530  
H 3.648926 -0.654575 1.711025  
C 5.441927 -2.681071 -0.364746  
H 4.961703 -3.080823 -2.435496  
H 5.669059 -2.095492 1.707660  
H 6.327765 -3.320852 -0.364574  
C 2.346270 1.754359 -0.561915  
C 3.572038 1.996199 -1.204246  
C 1.562400 2.846608 -0.149468  
C 3.997944 3.307702 -1.433016  
H 4.200335 1.161246 -1.523112  
C 1.985754 4.156380 -0.389055  
H 0.612812 2.674070 0.364144  
C 3.206752 4.388413 -1.029736  
H 4.955064 3.485926 -1.929571  
H 1.365099 4.996472 -0.067547  
H 5.544483 5.411889 -1.209991  
C -2.481414 -1.629512 -0.691859  
C -3.305991 -2.202826 0.295369  
C -2.281899 -2.319896 -1.897885  
C -3.927628 -3.432029 0.074003  
H -3.468839 -1.678518 1.241891  
C -2.896617 -3.559203 -2.111419  
H -1.649878 -1.901892 -2.683577  
C -3.720376 -4.115753 -1.130235  
H -4.573162 -3.861072 0.844312  
H -2.732630 -4.087547 -3.053874  
H -4.201479 -5.081757 -1.301575  
C -3.023294 1.212308 -0.312140  
C -4.222744 1.016529 -1.016545  
C -2.824264 2.415689 0.387364  
C -5.202124 2.013661 -1.022165  
H -4.397636 0.083424 -1.557305  
C -3.801375 3.414026 0.371415  
H -1.899498 2.575019 0.950087  
C -4.993352 3.212218 -0.331963  
H -6.134039 1.852620 -1.569807  
H -3.635938 4.346882 0.916050  
H -5.762662 3.988310 -0.338362  
C -0.419349 -2.541339 2.484462  
C 0.857209 -2.230567 2.812926  
H -1.246025 -2.389974 3.186567  
H -0.665177 -3.051308 1.547112  
H 1.696575 -2.488902 2.158387  
H 1.112112 -1.826922 3.798744  
C -0.846472 0.975731 3.577033  
C 0.439192 1.393143 3.433951  
H -1.682930 1.528433 3.136260  
H -1.107314 0.153705 4.251835  
H 1.259592 0.920789 3.984357  
H 0.692474 2.296818 2.869452

<sup>4</sup>TS2-3A

Geometry with 65 atoms:  
Total energy: -2889.251049020  
Cr 0.082973 -0.206762 1.553000  
P -1.697891 -0.118245 -0.373867  
P 1.599947 -0.153150 -0.453970  
C 0.567077 0.161998 -1.976941  
C -0.757011 -0.607713 -1.906668  
H 0.380771 1.244951 -2.041741  
H 1.146301 -0.122068 -2.868769  
H -1.369504 -0.417277 -2.802029  
H -0.572302 -1.693275 -1.850608

C -2.262194 1.585930 -0.763743  
C -1.627397 2.675877 -1.043990  
C -3.286161 1.825055 -1.696896  
C -2.000556 3.986296 -0.459637  
H -0.840664 2.505684 0.597259  
C -3.659263 3.134347 -2.006971  
H -3.799861 0.987069 -2.175200  
C -3.016610 4.215365 -1.391435  
H -1.502577 4.826717 0.029920  
H -4.458671 3.313030 -2.730294  
H -3.314439 5.238211 -1.634633  
C -3.216871 -1.137227 -0.355219  
C -4.184876 -0.840764 0.624042  
C -3.432404 -2.217823 -1.227041  
C -5.346807 -1.606778 0.722780  
H -4.033786 -0.000963 1.307954  
C -4.597332 -2.985278 -1.119371  
H -2.705627 -2.471947 -2.000628  
C -5.554368 -2.683203 -0.147613  
H -6.092837 -1.363669 1.483184  
H -4.756392 -3.821484 -1.804717  
H -6.463069 -3.284700 -0.068121  
C 2.808147 1.220585 -0.375944  
C 2.368294 2.543339 -0.507572  
C 4.136946 0.990086 0.019802  
C 3.251037 3.611609 -0.397437  
H 1.334449 2.952955 -0.857198  
C 5.014492 2.064120 0.193077  
H 4.492186 -0.028039 0.191590  
C 4.575975 3.374697 -0.016935  
H 2.900685 4.633836 -0.560148  
H 6.047267 1.873080 0.494406  
H 5.265332 4.211619 0.117704  
C 2.536094 -1.672839 -0.850957  
C 3.460796 -1.693764 -1.911771  
C 2.301932 -2.845602 -0.115372  
C 4.141262 -2.871275 -2.223537  
H 3.658123 -0.785212 -2.486842  
C 2.982095 -4.025275 -0.434820  
H 1.589345 -2.840914 0.713700  
C 3.902280 -4.037622 -1.485971  
H 4.862268 -2.879928 -3.044603  
H 2.794469 -4.933845 0.142173  
H 4.437895 -4.957652 -1.732638  
C -1.581452 0.073439 3.194946  
C -0.925203 -0.031408 4.412542  
H -1.868046 1.061445 2.813848  
H -2.148572 -0.783321 2.810292  
H -0.967799 -0.964354 4.978769  
H -0.688659 0.866940 4.986911  
C 1.788206 -0.388301 2.884061  
C 1.390533 -0.388556 4.259155  
H 2.200824 -1.338481 2.507132  
H 2.393437 0.472759 2.558931  
H 1.578930 0.492287 4.879757  
H 1.318354 -1.336136 4.800996

<sup>2</sup>2B

Geometry with 73 atoms:  
Total energy: -3118.329193560  
Cr 0.017117 0.396913 1.477232  
P -1.611121 0.085356 -0.266600  
P 1.556337 -0.248668 -0.375733  
C 0.634950 0.083964 -1.961214  
C -0.807334 -0.429365 -1.884290  
H 0.640514 1.177847 -2.091571  
H 1.170043 -0.357952 -2.815177  
H -1.393427 -0.027492 -2.724124  
H -0.837949 -1.524645 -1.933711  
C -2.061157 1.820266 -0.697302  
C -3.236773 2.196029 -1.356413  
C -1.127575 2.817600 -0.354717  
C -3.479656 3.534014 -1.682241  
H -3.976129 1.433762 -1.611689  
C -1.354403 4.156445 -0.683496  
C -2.535061 4.505291 -1.350328  
H -4.403856 3.813365 -2.192470  
H -0.637704 4.934332 -0.424483  
H -2.712036 5.553650 -1.601710  
C -3.164163 -0.883060 -0.233112  
C -3.818635 -1.292225 -1.410886

C -3.695090 -1.266089 1.010107  
 C -4.983901 -2.059848 -1.339665  
 H -3.426589 -1.019042 -2.392375  
 C -4.861711 -2.032401 1.077105  
 H -3.186153 -0.973145 1.927523  
 C -5.508120 -2.430154 -0.096785  
 H -5.484487 -2.370168 -2.260193  
 H -5.263577 -2.323076 2.050726  
 H -6.418964 -3.031627 -0.044648  
 C 2.294942 -1.925446 -0.550200  
 C 3.672584 -2.114477 -0.734972  
 C 1.460089 -3.065147 -0.454966  
 C 4.220539 -3.397263 -0.824211  
 H 4.331935 -1.248055 -0.808009  
 C 2.008241 -4.351900 -0.539140  
 C 3.385122 -4.509929 -0.723220  
 H 5.295500 -3.521516 -0.970289  
 H 1.371091 -5.232502 -0.462283  
 H 3.801650 -5.518152 -0.787568  
 C 3.009764 0.867411 -0.381063  
 C 3.429779 1.605221 -1.498570  
 C 3.701493 1.014083 0.837239  
 C 4.513858 2.484034 -1.394229  
 H 2.924338 1.500216 -2.460556  
 C 4.786885 1.886589 0.935909  
 H 3.391412 0.438313 1.714729  
 C 5.190944 2.628745 -0.179932  
 H 4.833246 3.053813 -2.270380  
 H 5.316933 1.990002 1.885832  
 H 6.037130 3.315859 -0.103579  
 O 0.005156 2.394518 0.333527  
 O 0.135571 -2.822177 -0.285878  
 C 0.999241 3.374030 0.670818  
 H 1.803408 2.843475 1.190498  
 H 1.410268 3.834723 -0.239511  
 H 0.576373 4.146428 1.331146  
 C -0.786272 -3.901221 -0.212218  
 H -0.586185 -4.543406 0.661837  
 H -1.781360 -3.449397 -0.106699  
 H -0.764668 -4.512557 -1.130423  
 C -0.439408 1.533099 3.225738  
 C -1.671131 1.384895 2.582958  
 H -0.206280 0.951983 4.123663  
 H 0.129155 2.466328 3.127847  
 H -2.085301 2.195181 1.978007  
 H -2.414471 0.685950 2.972678  
 C 0.880559 -1.201391 2.616537  
 C -0.494599 -1.434884 2.508505  
 H 1.592468 -1.809708 2.053092  
 H 1.289305 -0.727758 3.517243  
 H -1.164805 -1.178216 3.332824  
 H -0.869698 -2.203252 1.833561

<sup>2</sup>TS2-3B

Geometry with 73 atoms:  
 Total energy: -3118.326412220  
 Cr -0.000010 -0.000109 1.234288  
 P 1.471190 -0.052003 -0.615154  
 P -1.471208 0.052073 -0.615151  
 O 0.501492 -2.276562 1.140757  
 O -0.501472 2.276365 1.141099  
 C -0.699340 -0.304193 -2.275704  
 C 0.699325 0.304500 -2.275656  
 H -0.649498 -1.399017 -2.383511  
 H -1.329788 0.083555 -3.089865  
 H 1.329777 -0.083125 -3.089872  
 H 0.649478 1.399341 -2.383292  
 C 1.901504 -1.831882 -0.749167  
 C 2.734294 -2.307564 -1.774822  
 C 1.328224 -2.760559 0.148484  
 C 3.009672 -3.667685 -1.914296  
 H 3.181900 -1.592311 -2.469625  
 C 1.599892 -4.129906 0.009775  
 C 2.437167 -4.572325 -1.017360  
 H 3.664139 -4.018074 -2.714975  
 H 1.166151 -4.861486 0.689375  
 H 2.639431 -5.641942 -1.112116  
 C 3.046535 0.884329 -0.650647  
 C 2.993576 2.263231 -0.928313  
 C 4.275635 0.305589 -0.295972  
 C 4.152885 3.039894 -0.873397

H 2.044768 2.742339 -1.186789  
 C 5.433100 1.088021 -0.239109  
 H 4.335586 -0.759475 -0.064025  
 C 5.375906 2.453755 -0.529393  
 H 4.101093 4.107894 -1.099723  
 H 6.384499 0.624780 0.033829  
 H 6.282496 3.062306 -0.486676  
 C -1.901477 1.831985 -0.748905  
 C -2.734236 2.307840 -1.774505  
 C -1.328181 2.760521 0.148883  
 C -3.009574 3.667988 -1.913792  
 H -3.181849 1.592699 -2.469419  
 C -1.599808 4.129895 0.010362  
 C -2.437056 4.572485 -1.016721  
 H -3.664018 4.018507 -2.714433  
 H -1.166055 4.861366 0.690072  
 H -2.639289 5.642120 -1.111328  
 C -3.046577 -0.884213 -0.650786  
 C -2.993653 -2.263079 -0.928635  
 C -4.275666 -0.305488 -0.296045  
 C -4.152984 -3.039717 -0.873836  
 H -2.044856 -2.742180 -1.187162  
 C -5.433152 -1.087896 -0.239297  
 H -4.335590 0.759546 -0.063956  
 C -5.375993 -2.453592 -0.529765  
 H -4.101219 -4.107689 -1.100303  
 H -6.384541 -0.624666 0.033695  
 H -6.282600 -3.062125 -0.487137  
 C -0.026988 -3.196376 2.102443  
 H -0.601181 -2.607480 2.822484  
 H -0.697940 -3.923621 1.618921  
 H 0.785798 -3.720632 2.628650  
 C 0.027058 3.196044 2.102889  
 H -0.785699 3.720277 2.629163  
 H 0.601231 2.607039 2.822858  
 H 0.698039 3.923315 1.619444  
 C -1.822644 -0.202834 2.238174  
 C -1.000992 0.045222 3.410466  
 H -2.536650 0.586439 1.973314  
 H -2.258262 -1.203715 2.125379  
 H -1.028827 -0.719616 4.193077  
 H -1.102874 1.048652 3.837353  
 C 1.822622 0.202451 2.238217  
 C 1.000962 -0.045788 3.410464  
 H 2.536621 -0.586785 1.973232  
 H 2.258254 1.203344 2.125589  
 H 1.028793 0.718927 4.193196  
 H 1.102835 -1.049286 3.837195

<sup>4</sup>2B

Geometry with 73 atoms:  
 Total energy: -3118.366693530  
 Cr 0.067866 -0.211765 1.550195  
 P -1.545569 0.151491 -0.374997  
 P 1.647878 0.039315 -0.343987  
 O -0.285414 2.788286 -0.091596  
 O 0.163276 -2.352722 0.541254  
 C 0.786446 0.532172 -1.926129  
 C -0.600196 -0.114496 -1.965590  
 H 0.698149 1.626026 -1.939938  
 H 1.389008 0.221847 -2.794036  
 H -1.187201 0.261186 -2.816982  
 H -0.504224 -1.206655 -2.078044  
 C -2.364504 1.788984 -0.577692  
 C -3.727093 1.911950 -0.886585  
 C -1.600144 2.967300 -0.396278  
 C -4.327404 3.167571 -1.019074  
 H -4.330674 1.013157 -1.025394  
 C -2.198753 4.226382 -0.531299  
 C -3.559388 4.318638 -0.841824  
 H -5.389658 3.241172 -1.261153  
 H -1.615011 5.136859 -0.397479  
 H -4.016390 5.305824 -0.945173  
 C -2.928475 -1.055165 -0.470502  
 C -3.310862 -1.690790 -1.664172  
 C -3.620276 -1.366302 0.714842  
 C -4.352149 -2.624753 -1.666133  
 H -2.807299 -1.464010 -2.605370  
 C -4.666476 -2.291063 0.708619  
 H -3.336816 -0.887772 1.654548  
 C -5.031367 -2.927028 -0.482548

H -4.636132 -3.114193 -2.601030  
 H -5.194232 -2.519732 1.637797  
 H -5.845714 -3.655670 -0.488294  
 C 2.083885 -1.712445 -0.712825  
 C 3.197841 -2.064899 -1.487470  
 C 1.251307 -2.738686 -0.216571  
 C 3.488959 -3.401976 -1.767569  
 H 3.852435 -1.277350 -1.868436  
 C 1.534972 -4.080788 -0.495172  
 C 2.653598 -4.403207 -1.270059  
 H 4.363424 -3.658216 -2.369340  
 H 0.899961 -4.880633 -0.116966  
 H 2.868502 -5.453760 -1.479921  
 C 3.246348 0.935584 -0.371760  
 C 3.456616 2.056991 -1.193875  
 C 4.278504 0.527544 0.495567  
 C 4.668145 2.754860 -1.145803  
 H 2.682385 2.399156 -1.881931  
 C 5.487343 1.223947 0.535398  
 H 4.146328 -0.347801 1.132643  
 C 5.685301 2.342094 -0.282213  
 H 4.816568 3.621993 -1.794184  
 H 6.280282 0.889390 1.208775  
 H 6.632115 2.886483 -0.248767  
 C 0.565326 3.908770 0.103952  
 H 1.549320 3.503606 0.372198  
 H 0.658547 0.508764 -0.817467  
 H 0.206411 4.556364 0.922181  
 C -0.732500 -3.357852 1.029253  
 H -0.210338 -4.061098 1.696389  
 H -1.512146 -2.832957 1.590717  
 H -1.199367 -3.901280 0.193262  
 C -0.584745 1.698169 2.931886  
 H -1.711958 0.946353 2.967142  
 H 0.213112 1.580236 3.669921  
 H -0.499832 2.543583 2.247534  
 H -2.561347 1.189151 2.322766  
 H -1.862719 0.166740 3.719507  
 C 1.850520 -0.759144 2.625056  
 C 0.686283 -1.131519 3.342161  
 H 2.447998 -1.529131 2.125734  
 H 2.425619 0.121490 2.935258  
 H 0.391907 -0.587661 4.246768  
 H 0.370104 -2.182534 3.340329

<sup>4</sup>TS2-3B

Geometry with 73 atoms:  
 Total energy: -3118.363816240  
 Cr -0.000010 -0.000082 1.425369  
 P 1.522529 -0.122697 -0.530412  
 P -1.522532 0.122760 -0.530409  
 O 0.193465 -2.466274 0.748085  
 O -0.193415 2.466156 0.748367  
 C -0.698244 -0.309966 -2.148047  
 C 0.698252 0.310249 -2.147996  
 H -0.631788 -1.407289 -2.214767  
 H -1.310354 0.043400 -2.991982  
 H 1.310371 -0.042995 -2.991975  
 H 0.631788 1.407580 -2.214561  
 C 1.930105 -1.896898 -0.771998  
 C 2.931662 -2.298454 -1.670229  
 C 1.193044 -2.890231 -0.084715  
 C 3.223322 -3.647565 -1.875334  
 H 3.500168 -1.536786 -2.209353  
 C 1.489365 -4.246833 -0.283496  
 C 2.500820 -4.615437 -1.174109  
 H 4.009605 -3.939340 -2.574415  
 H 0.938053 -5.021772 0.247462  
 H 2.720428 -5.676135 -1.318613  
 C 3.108815 0.790117 -0.547887  
 C 3.126759 2.132288 -0.970244  
 C 4.282407 0.228944 -0.014101  
 C 4.298984 2.887406 -0.879182  
 H 2.226751 2.602341 -1.372517  
 C 5.451783 0.988419 0.074659  
 H 4.288299 -0.805590 0.334045  
 C 5.464686 2.317778 -0.358236  
 H 4.300378 3.925739 -1.220036  
 H 6.357754 0.536625 -0.485983  
 H 6.381129 2.908789 -0.289504  
 C -1.930112 1.896997 -0.771737

C -2.931693 2.298690 -1.669881  
C -1.193035 2.890231 -0.084326  
C -3.223369 3.647832 -1.874764  
H -3.500203 1.537107 -2.209119  
C -1.489376 4.246861 -0.282878  
C -2.500861 4.615599 -1.173402  
H -4.009671 3.939710 -2.573780  
H -0.938055 5.021719 0.248190  
H -2.720483 5.676318 -1.317728  
C -3.108813 -0.790063 -0.548003  
C -3.126737 -2.132189 -0.970502  
C -4.282416 -0.228960 -0.014168  
C -4.298956 -2.887328 -0.879538  
H -2.226721 -2.602193 -1.372814  
C -5.451786 -0.988457 0.074495  
H -4.288320 0.805535 0.334092  
C -5.464671 -2.317769 -0.358546  
H -4.300335 -3.925625 -1.220503  
H -6.357766 -0.536717 0.485859  
H -6.381109 -2.908795 -0.289891  
C -0.588950 -3.422932 1.459009  
H -1.348592 -2.854194 2.008014  
H -1.096817 -4.117322 0.770969  
H 0.029359 -3.991826 2.172813  
C 0.589056 3.422715 1.459364  
H -0.029193 3.991494 2.173311  
H 1.348756 2.853902 2.008210  
H 1.096850 4.117215 0.771381  
C -1.840158 -0.003452 2.410761  
C -0.970236 -0.209879 3.548365  
H -2.361261 0.961011 2.348291  
H -2.466709 -0.847967 2.104741  
H -0.912404 -1.247662 3.898316  
H -1.086940 0.482829 4.387544  
C 1.840125 0.003181 2.410788  
C 0.970188 0.209511 3.548398  
H 2.361215 -0.961283 2.348230  
H 2.466690 0.847718 2.104856  
H 0.912355 1.247265 3.898439  
H 1.086877 -0.483271 4.387518

<sup>6</sup>B

Geometry with 73 atoms:  
Total energy: -3118.393763650  
Cr -0.003093 -0.005030 1.563317  
P -1.668670 0.127365 -0.336161  
P 1.654829 -0.119353 -0.351555  
O -0.281617 2.686180 -0.166625  
O 0.274350 -2.681643 -0.225068  
C 0.706620 0.271657 -1.917140  
C -0.734419 -0.255071 -1.912565  
H 0.708859 1.368143 -1.991827  
H 1.249171 -0.130603 -2.786436  
H -1.284871 0.155039 -2.773214  
H -0.737824 -1.350678 -1.996046  
C -2.413793 1.788177 -0.622244  
C -3.768399 1.973818 -0.930753  
C -1.588126 2.928911 -0.472446  
C -4.302298 3.256019 -1.094809  
H -4.419294 1.104138 -1.040720  
C -2.120021 4.214214 -0.635126  
C -3.475166 4.369544 -0.946844  
H -5.360100 3.379598 -1.336464  
H -1.489780 5.096082 -0.523000  
H -3.880590 5.376514 -1.072682  
C -3.098466 -1.020286 -0.367440  
C -3.586609 -1.624023 -1.538950  
C -3.711733 -1.321635 0.862209  
C -4.661040 -2.516827 -1.476569  
H -3.136432 -1.402903 -2.508730  
C -4.792608 -2.204624 0.920426  
H -3.337791 -0.862731 1.782386  
C -5.265654 -2.808000 -0.249702  
H -5.030286 -2.983854 -2.393000  
H -5.262858 -2.426638 1.881590  
H -6.106163 -3.504974 -0.205586  
C 2.408786 -1.774803 -0.645690  
C 3.768995 -1.954559 -0.932348  
C 1.585695 -2.919412 -0.512309  
C 4.310631 -3.234459 -1.089528  
H 4.418301 -1.082237 -1.029587

C 2.125023 -4.202364 -0.668106  
C 3.485939 -4.351695 -0.956975  
H 5.372871 -3.353336 -1.313449  
H 1.496466 -5.086860 -0.567789  
H 3.897701 -5.356810 -1.076918  
C 3.079801 1.034326 -0.385138  
C 3.557626 1.646082 -1.556668  
C 3.701416 1.330463 0.841627  
C 4.629398 2.542218 -1.497189  
H 3.101895 1.428112 -2.524550  
C 4.779622 2.216996 0.896899  
H 3.336436 0.864446 1.761697  
C 5.241906 2.828770 -0.273179  
H 4.990607 3.015137 -2.413813  
H 5.256307 2.435102 1.855789  
H 6.080374 3.528337 -0.231349  
C 0.623434 3.767529 0.003412  
H 1.599922 3.320732 0.227798  
H 0.712200 4.367677 -0.918082  
H 0.319712 4.422947 0.837322  
C -0.629583 -3.766102 -0.070329  
H -0.335559 -4.422887 0.765924  
H -1.610033 -3.321902 0.142122  
H -0.703629 -4.364442 -0.994284  
C 0.654208 1.774436 3.172920  
C -0.702360 1.792297 3.114532  
H 1.185256 1.257695 3.978953  
H 1.263842 2.376392 2.492119  
H -1.235678 2.407240 2.382706  
H -1.313474 1.293440 3.873813  
C 0.784956 -1.876947 3.029622  
C -0.568459 -1.882818 3.113096  
H 1.316380 -2.453774 2.266302  
H 1.401257 -1.390176 3.792361  
H -1.090719 -1.399028 3.945065  
H -1.184393 -2.469678 2.425106

<sup>4</sup>TS2-3B

Geometry with 73 atoms:  
Total energy: -3118.333194250  
Cr 0.078016 0.015693 1.489611  
P 1.621281 -0.135944 -0.495238  
P -1.636252 0.137912 -0.476237  
O 0.062463 -2.522226 0.226348  
O -0.115627 2.553181 0.217768  
C -0.711841 -0.312396 -2.029155  
C 0.678004 0.330701 -2.030540  
H -0.623497 -1.408890 -2.046592  
H -1.289275 -0.001788 -2.913545  
H 1.252675 0.030388 -2.920316  
H 0.590148 1.427232 -2.034251  
C 2.104951 -1.885068 -0.789136  
C 3.307643 -2.236312 -1.419694  
H 1.232314 -2.914922 -0.360127  
C 3.653061 -3.574916 -1.619484  
H 3.988326 -1.449628 -1.752676  
C 1.580134 -4.258148 -0.554004  
C 2.787599 -4.578902 -1.181655  
H 4.593837 -3.829427 -2.111917  
H 0.919909 -5.057868 -0.220020  
H 3.048231 -5.630174 -1.326767  
C 3.176260 0.823714 -0.552113  
C 3.382402 1.882326 -1.453056  
C 4.171812 0.531832 0.400499  
C 4.560643 2.634450 -1.398584  
H 2.634818 2.132335 -2.207263  
C 5.347589 1.282086 0.446238  
H 4.031170 -0.290006 1.105750  
C 5.543477 2.338097 -0.450978  
H 4.710303 3.452948 -2.107060  
H 6.113687 1.041618 1.187237  
H 6.463435 2.926460 -0.412885  
C -2.156214 1.877751 -0.776583  
C -3.371024 2.207268 -1.395421  
C -1.295588 2.924332 -0.363764  
C -3.738285 3.539337 -1.601759  
H -4.043301 1.407703 -1.715065  
C -1.662891 4.260997 -0.566872  
C -2.881796 4.559358 -1.183967  
H -4.688340 3.776312 -2.085168  
H -1.009389 5.072715 -0.248423

H -3.158447 5.605493 -1.336403  
C -3.180792 -0.841845 -0.518978  
C -3.407967 -1.873576 -1.445595  
C -4.142677 -0.599829 0.481448  
C -4.569870 -2.649214 -1.367445  
H -2.688810 -2.084144 -2.238662  
C -5.303496 -1.371130 0.550358  
H -3.987588 0.201866 1.207529  
C -5.517879 -2.402387 -0.371524  
H -4.734417 -3.447531 -2.095461  
H -6.042558 -1.167947 1.329164  
H -6.424728 -3.009263 -0.314646  
C -0.870395 -3.498208 0.678821  
H -1.722921 -2.943010 1.089612  
H -1.225928 -4.128839 -0.152457  
H -0.434562 -4.134179 1.467341  
C 0.823214 3.543151 0.624519  
H 0.404841 4.195353 1.409297  
H 1.688210 3.000900 1.027029  
H 1.153697 4.157400 -2.229320  
C -1.690909 0.060981 3.056883  
C -1.102498 0.067663 4.308710  
H -2.056756 0.999986 2.623697  
H -2.114450 -0.866476 2.654778  
H -1.054729 -0.849332 4.899945  
H -1.003651 1.002224 4.864846  
C 1.722081 -0.004440 2.925619  
C 1.267435 0.009273 4.281725  
H 2.222151 -0.931310 2.600195  
H 2.265733 0.893700 2.592801  
H 1.319383 0.933809 4.864311  
H 1.273294 -0.914562 4.867594

<sup>4</sup>TS5-6A-01

Geometry with 71 atoms:  
Total energy: -2967.017803000  
Cr -0.016021 -0.057269 1.290493  
P -1.581017 0.425961 -0.596658  
P 1.584785 0.411283 -0.553085  
C 0.721910 0.654805 -2.199299  
C -0.690438 1.222273 -2.031610  
H 1.337229 1.289530 -2.855572  
H 0.684401 -0.341552 -2.664696  
H -0.666189 2.298263 -1.794279  
H -1.275458 1.104009 -2.956378  
C -3.012275 1.526511 -0.303672  
C -3.795248 2.010939 -1.368564  
C -3.317184 1.923306 1.009029  
C -4.865637 2.871844 -1.118134  
H -3.578061 1.713216 -2.397102  
C -4.390540 2.784448 1.255264  
H -2.716653 1.556878 1.844425  
C -5.165586 3.257899 0.193334  
H -5.469219 3.242314 -1.950275  
H -4.619689 3.085705 2.280203  
H -6.004538 3.931030 0.386112  
C -2.240740 -1.160431 -2.256630  
C -3.615173 -1.403662 -1.411161  
C -1.327437 -2.195854 -1.540088  
C -4.063868 -2.650020 -1.860843  
H -4.343758 -0.625605 -1.177685  
C -1.780740 -3.435213 -1.995740  
H -0.253318 -2.049901 -1.400552  
C -3.151186 -3.665080 -2.157895  
H -5.136167 -2.826140 -1.976271  
H -1.060184 -4.226319 -2.217178  
H -3.506320 -4.637044 -2.508627  
C 2.594452 1.923332 -0.316557  
C 3.803180 1.856681 0.399730  
C 2.132057 3.172678 -0.765756  
C 4.537915 3.017757 0.649496  
H 4.180355 0.895065 0.753530  
C 2.869657 4.331980 -0.508798  
H 1.195724 3.255515 -1.322199  
C 4.073058 4.257426 0.198148  
H 5.480604 2.952159 1.198189  
H 2.501830 5.296476 -0.867162  
H 4.649688 5.164288 0.395557  
C 2.767584 -0.942832 -0.906283  
C 3.849258 -0.756201 -1.784467  
C 2.540664 -2.214086 -0.353182

C 4.685728 -1.828332 -2.102465  
H 4.044623 0.229233 -2.214331  
C 3.378097 -3.285910 -0.675941  
H 1.709483 -2.372536 0.339184  
C 4.451084 -3.093059 -1.550628  
H 5.526028 -1.675921 -2.784122  
H 3.194723 -4.270180 -0.238440  
H 5.108804 -3.928804 -1.801488  
C 1.748542 0.071035 2.455119  
C 0.746922 -0.491219 3.327157  
C 0.795064 -1.983170 3.678483  
C -0.588115 -2.612879 3.899198  
C -1.508425 -2.503149 2.672749  
C -1.843911 -1.054330 2.284151  
H 2.573458 -0.574036 2.130687  
H 2.040046 1.118423 2.597491  
H 0.423808 0.144428 4.167784  
H -0.539999 -0.490182 2.794174  
H 1.315158 -2.525253 2.867874  
H 1.419847 -2.112361 4.578750  
H -1.078467 -2.125208 4.761941  
H -0.462194 -3.672292 4.175270  
H -1.036084 -3.021649 1.815984  
H -2.445154 -3.055543 2.867894  
H -2.543661 -1.029911 1.440016  
H -2.354716 -0.544963 3.120750

<sup>4</sup>TS5-6A-02

Geometry with 71 atoms:

Total energy: -2967.020052440  
Cr 0.000772 -0.243280 1.260675  
P 1.622972 0.266547 -0.543559  
P -1.484115 0.279320 -0.691680  
C -0.530828 1.057116 -2.093023  
C 0.815070 0.340349 -2.226218  
H -1.118916 0.999509 -3.021536  
H -0.387294 2.123494 -1.856000  
H 0.674732 -0.692492 -2.582177  
H 1.480534 0.848319 -2.940683  
C 3.099610 -0.789807 -0.758919  
C 2.939190 -2.069850 -1.321253  
C 4.360462 -0.406061 -0.272776  
C 4.027742 -2.939633 -1.414101  
H 1.963080 -2.400866 -1.686815  
C 5.445517 -1.282617 -0.365929  
H 4.501878 0.578091 0.178409  
C 5.283417 -2.547408 -0.938039  
H 3.893960 -3.929016 -1.858402  
H 6.422833 -0.972592 0.011951  
H 6.133784 -3.229748 -1.010042  
C 2.195214 1.994212 -0.323749  
C 3.081539 2.600562 -1.231361  
C 1.669825 2.753121 0.734531  
C 3.434535 3.942448 -1.074644  
H 3.503802 2.023660 -2.058182  
C 2.017600 4.098635 0.885662  
H 0.984355 2.280906 1.445731  
C 2.902027 4.692644 -0.019123  
H 4.128158 4.406299 -1.780124  
H 1.601544 4.680047 1.711805  
H 3.179666 5.743023 0.097848  
C -2.027362 -1.312642 -1.420914  
C -1.541782 -2.508115 -0.865067  
C -2.847498 -1.368336 -2.561663  
C -1.867047 -3.741542 -1.436615  
H -0.904902 -2.472560 0.024932  
C -3.177105 -2.601663 -3.127625  
H -3.235616 -0.448081 -3.005724  
C -2.686861 -3.787753 -2.567633  
H -1.484311 -4.664595 -0.994886  
H -3.819259 -2.638376 -4.010955  
H -2.946746 -4.750226 -3.015019  
C -2.962723 1.326222 -0.450048  
C -4.258552 0.789164 -0.372619  
C -2.772974 2.702610 -0.221989  
C -5.347180 1.620540 -0.091090  
H -4.425477 -0.277200 -0.536149  
C -3.864499 3.527795 0.053487  
H -1.770352 3.138502 -0.256075  
C -5.154178 2.988446 0.118431  
H -6.351593 1.193740 -0.036883

H -3.707306 4.596182 0.220822  
H -6.007609 3.635182 0.335958  
C 1.792967 -0.458991 2.367458  
C 0.724478 -0.635177 3.320427  
C 0.432271 -2.019168 3.912540  
C -1.042452 -2.221696 4.286308  
C -1.981208 -2.143514 3.072022  
C -1.962297 -0.791571 2.337419  
H 2.355996 -1.347056 2.053514  
H 2.406346 0.447045 2.421407  
H 0.598106 0.180173 4.051219  
H -0.551674 -0.488620 2.785697  
H 0.733520 -2.792049 3.182090  
H 1.076485 -2.163911 4.796361  
H -1.339639 -1.459102 5.029978  
H -1.162524 -3.198275 4.782488  
H -1.709251 -2.948353 2.363447  
H -3.013840 -2.369201 3.393526  
H -2.613160 -0.841898 1.455311  
H -2.372205 0.010852 2.976226

<sup>4</sup>TS5-6A-03

Geometry with 71 atoms:

Total energy: -2967.016755480  
Cr 0.063341 -0.583236 1.126242  
P 1.637383 0.246241 -0.595458  
P -1.580055 0.228556 -0.643874  
C -0.641946 1.002921 -2.066084  
C 0.752987 0.394166 -2.236721  
H -1.231108 0.922607 -2.992486  
H -0.569262 2.075105 -1.828943  
H 0.697099 -0.634217 -2.629528  
H 1.354477 0.986031 -2.943724  
C 3.061329 -0.837860 -0.982220  
C 3.817751 -0.664859 -2.156959  
C 3.377920 -1.897582 -0.114953  
C 4.874865 -1.530099 -2.446815  
H 3.589751 0.148848 -2.849359  
C 4.436211 -2.761914 -0.409103  
H 2.796883 -2.051453 0.796324  
C 5.186650 -2.577959 -1.573379  
H 5.457624 -1.385756 -3.359780  
H 4.672713 -3.581439 0.273681  
H 6.014463 -3.253063 -1.803527  
C 2.279798 1.936837 -0.273881  
C 3.629040 2.289615 -0.432319  
C 1.364676 2.910312 0.171823  
C 4.048389 3.598619 -0.172051  
H 4.362005 1.547754 -0.753440  
C 1.786491 4.217498 0.420939  
H 0.314567 2.653900 0.335973  
C 3.130664 4.564909 0.247623  
H 5.101736 3.861073 -0.297603  
H 1.064021 4.963705 0.760455  
H 3.462674 5.586577 0.447374  
C -2.686754 -1.027656 -1.389931  
C -3.871050 -1.379919 -0.716723  
C -2.326930 -1.727132 -2.554864  
C -4.684660 -2.401917 -1.209949  
H -4.166625 -0.847991 0.190801  
C -3.144443 -2.751289 -3.042427  
H -1.411485 -1.480511 -3.097171  
C -4.323265 -3.090698 -2.372386  
H -5.606322 -2.660345 -0.682812  
H -2.857974 -3.284153 -3.952426  
H -4.960795 -3.890790 -2.756054  
C -2.689348 1.567320 -0.068277  
C -3.685027 2.097310 -0.908085  
C -2.509229 2.105974 1.215721  
C -4.480439 3.156020 -0.467026  
H -3.843886 1.675937 -1.904037  
C -3.307136 3.167860 1.654037  
H -1.745860 1.693514 1.882288  
C -4.291156 3.693205 0.812377  
H -5.253281 3.563710 -1.123185  
H -3.162337 3.580559 2.655281  
H -4.916668 4.521492 1.154025  
C 1.562065 0.009258 2.488128  
C 0.604184 -0.727728 3.275593  
C 0.953221 -2.108317 3.839068  
C -0.246169 -3.066790 3.888480

C -0.828884 -3.356533 2.495983  
C -1.421057 -2.125657 1.785211  
H 2.562028 -0.415486 2.342126  
H 1.567870 1.103860 2.557355  
H -0.021082 -0.129611 3.958568  
H -0.515720 -1.185275 2.537749  
H 1.751269 -2.558529 3.221637  
H 1.381119 -1.978377 4.847655  
H -1.033811 -2.637611 4.535482  
H 0.061960 -4.011820 4.363865  
H -0.031069 -3.793802 1.866385  
H -1.605506 -4.138006 2.575004  
H -1.686421 -2.375368 0.747068  
H -2.345625 -1.782863 2.280188

<sup>4</sup>TS5-6A-04

Geometry with 71 atoms:

Total energy: -2967.013842570  
Cr 0.057981 -0.443729 1.185666  
P 1.631646 0.220885 -0.604255  
P -1.580484 0.175552 -0.652103  
C -0.655761 0.880228 -2.117888  
C 0.751327 0.290726 -2.253320  
H -1.243156 0.731913 -3.037134  
H -0.603934 1.965561 -1.941179  
H 0.718368 -0.751378 -2.610323  
H 1.348029 0.866892 -2.977040  
C 3.055381 -0.878018 -0.945343  
C 3.815802 -0.743430 -2.122905  
C 3.364081 -1.913460 -0.046906  
C 4.869541 -1.621393 -2.384664  
H 3.592697 0.049542 -2.840555  
C 4.418568 -2.791477 -0.313732  
H 2.780073 -0.039245 0.866575  
C 5.173247 -2.645314 -1.480568  
H 5.455361 -1.506120 -3.299818  
H 4.648205 -3.592879 0.392486  
H 5.997761 -3.331414 -1.689075  
C 2.269342 1.926782 -0.356018  
C 3.617739 2.279240 -0.519409  
C 1.349522 2.909773 0.059005  
C 4.032866 3.595478 -0.289581  
H 4.354007 1.531016 -0.817463  
C 1.766789 4.223620 0.277654  
H 0.299697 2.652950 0.227373  
C 3.111429 4.569361 0.103269  
H 5.086293 3.857208 -0.416009  
H 1.041398 4.976270 0.596036  
H 3.440796 5.595748 0.282140  
C -2.651732 -1.152943 -1.316593  
C -3.893652 -1.419151 -0.712956  
C -2.204943 -1.982310 -2.360247  
C -4.677052 -2.487488 -1.155967  
H -4.260400 -0.782443 0.095425  
C -2.993229 -3.049508 -2.799439  
H -1.242756 -1.803011 -2.844672  
H -4.229710 -3.304631 -2.198814  
H -5.644339 -2.678910 -0.684993  
H -2.639368 -3.681728 -3.617418  
H -4.845347 -4.138268 -2.544996  
C -2.717110 1.526724 -0.162221  
C -3.696555 2.013949 -1.046132  
C -2.573832 2.120047 1.102788  
C -4.512989 3.080743 -0.666916  
H -3.827831 1.552590 -2.028202  
C -3.392946 3.189297 1.479446  
H -1.822516 1.745978 1.805092  
C -4.361562 3.669805 0.594498  
H -5.272756 3.454480 -1.357617  
H -3.275574 3.642918 2.466497  
H -5.003657 4.503899 0.887873  
C 1.602836 0.122153 2.482200  
C 0.608124 -0.491423 3.334583  
C 0.890446 -1.838528 4.035114  
C 0.268525 -3.077014 3.360290  
C -1.222274 -2.891088 3.039417  
C -1.442549 -1.916868 1.868211  
H 2.571301 -0.378231 2.364698  
H 1.685606 1.215687 2.843733  
H 0.037612 0.215494 3.956050  
H -0.541024 -0.944031 2.640035

H 1.980134 -1.976578 4.126577  
H 0.495708 -1.775554 5.061992  
H 0.413523 -3.946929 4.020320  
H 0.812160 -3.315049 2.424618  
H -1.683674 -3.864243 2.798683  
H -1.740185 -2.523655 3.944214  
H -1.232112 -2.441086 0.915823  
H -2.477109 -1.547742 1.818500

<sup>4</sup>TSS-6A-05

Geometry with 71 atoms:

Total energy: -2967.012037800  
Cr -0.016485 0.038238 1.259970  
P -1.585412 0.350899 -0.666276  
P 1.603172 0.365929 -0.595868  
C 0.742147 0.526019 -2.254408  
C -0.677717 1.085910 -2.123713  
H 1.352406 1.135197 -2.938921  
H 0.714658 -0.492769 -2.669425  
H -0.667216 2.171321 -1.934569  
H -1.250304 0.921126 -3.049226  
C -3.026611 1.459639 -0.455614  
C -3.780511 1.897845 -1.560931  
C -3.367053 1.913265 0.830128  
C -4.858313 2.766261 -1.376755  
H -3.534413 1.558910 -2.570101  
C -4.447748 2.781800 1.009841  
H -2.788755 1.588048 1.698069  
C -5.194709 3.207147 -0.091793  
H -5.438841 3.099964 -2.240296  
H -4.704102 3.127246 2.014203  
H -6.039175 3.886204 0.048947  
C -2.219401 -1.270016 -1.256726  
C -3.583492 -1.524079 -1.470566  
C -1.290613 -2.312107 -1.448659  
C -4.005786 -2.789685 -1.891012  
H -4.324330 -0.739530 -1.307927  
C -1.716718 -3.570592 -1.876803  
H -0.225586 -2.154197 -1.258260  
C -3.076635 -3.811790 -2.100397  
H -5.070316 -2.974989 -2.054223  
H -0.983965 -4.367103 -2.027738  
H -3.411246 -4.798293 -2.430258  
C 2.672409 1.847956 -0.441856  
C 3.903169 1.755810 0.232633  
C 2.233675 3.103611 -0.897010  
C 4.682071 2.897213 0.436244  
H 4.261280 0.789361 0.593344  
C 3.016068 4.242924 -0.687570  
H 1.280916 3.209698 -1.420336  
C 4.240788 4.142929 -0.021200  
H 5.640245 2.810828 0.954449  
H 2.665798 5.212396 -1.050204  
H 4.851356 5.034511 0.140313  
C 2.741641 -1.045477 -0.855587  
C 3.763641 -0.982088 -1.819708  
C 2.546553 -2.234754 -0.135140  
C 4.571329 -2.095611 -2.057715  
H 3.933900 -0.058855 -2.379555  
C 3.355065 -3.349513 -0.378252  
H 1.765181 -2.292227 0.627274  
C 4.366702 -3.280190 -1.339867  
H 5.365278 -2.039547 -2.806492  
H 3.196198 -4.270361 0.187909  
H 5.000868 -4.149536 -1.529746  
C 1.710945 0.294690 2.454167  
C 0.675205 -0.133499 3.364818  
C 0.690146 -1.574083 3.886184  
C -0.677468 -2.103179 4.382000  
C -1.910499 -1.481797 3.685645  
C -1.709619 -1.135337 2.198877  
H 2.527252 -0.403850 2.234011  
H 2.028328 1.343521 2.478425  
H 0.330817 0.612160 4.099075  
H -0.567396 -0.286126 2.769115  
H 1.060523 -2.217862 3.068981  
H 1.440891 -1.658390 4.689082  
H -0.770594 -1.935256 5.467080  
H -0.688855 -3.197107 4.245877  
H -2.769212 -2.165038 3.798184  
H -2.200498 -0.557950 4.217941

H -1.415007 -2.030411 1.618053  
H -2.648827 -0.756544 1.774290

<sup>4</sup>TSS-6A-06

Geometry with 71 atoms:

Total energy: -2967.013820960  
Cr 0.070180 -0.623681 1.145028  
P -1.407297 0.305993 -0.641231  
P 1.695813 0.199517 -0.510751  
C 0.938645 0.290893 -2.210083  
C -0.453450 0.924439 -2.130724  
H 1.596835 0.841059 -2.899835  
H 0.897560 -0.745740 -2.580579  
H -0.367352 2.013584 -1.992495  
H -1.032803 0.749859 -3.049910  
C -2.546771 1.676733 -0.240094  
C -3.390088 2.225092 -1.224066  
C -2.547213 2.223068 1.053249  
C -4.222189 3.301416 -0.912099  
H -3.402737 1.807397 -2.234158  
C -3.381851 3.301635 1.361040  
H -1.898429 1.803125 1.826080  
C -4.218910 3.840145 0.380207  
H -4.876643 3.721846 -1.679533  
H -3.377953 3.720374 2.370176  
H -4.871730 4.682599 0.621530  
C -2.441537 -1.081637 -1.254659  
C -3.816016 -1.161435 -0.976484  
C -1.810027 -2.163312 -1.897929  
C -4.543869 -2.297706 -1.344063  
H -4.325779 -0.338508 -0.472044  
C -2.542651 -3.292600 -2.268398  
H -0.738656 -2.136433 -2.111045  
C -3.911866 -3.363855 -1.989338  
H -5.612874 -2.346738 -1.123011  
H -2.041087 -4.122514 -2.772145  
H -4.483753 -4.250235 -2.274022  
C 2.010035 1.948756 -0.060938  
C 1.750142 2.353789 1.259575  
C 2.465522 2.898573 -0.992012  
C 1.940685 3.682714 1.646206  
H 1.393757 1.619480 1.989132  
C 2.655939 4.226748 -0.603564  
H 2.676953 2.608678 -2.023819  
C 2.393829 4.620164 0.713727  
H 1.734767 3.985585 2.675576  
H 3.011313 4.958655 -1.332937  
H 2.542452 5.660724 1.012327  
C 3.313505 -0.605413 -0.794708  
C 4.539967 0.054847 -0.625806  
C 3.304569 -1.963356 -1.162993  
C 5.739524 -0.633159 -0.837816  
H 4.565658 1.105161 -0.328798  
C 4.503822 -2.642972 -1.381064  
H 2.356564 -2.498332 -1.276121  
C 5.724446 -1.977501 -1.218130  
H 6.690754 -0.112185 -0.704208  
H 4.487126 -3.696108 -1.672008  
H 6.663907 -2.510350 -1.383834  
C 1.799463 -1.336009 2.109425  
C 0.730826 -1.567179 3.051065  
C 0.191231 -2.995790 3.273529  
C -0.654230 -3.490897 2.087879  
C -2.004218 -2.752857 1.936059  
C -1.917336 -1.226626 2.150647  
H 2.213772 -2.192398 1.562111  
H 2.555833 -0.580424 2.349574  
H 0.765100 -0.947710 3.960025  
H -0.519759 -1.081789 2.633187  
H 1.042586 -3.674644 3.445616  
H -0.422139 -3.020071 4.189748  
H -0.836694 -4.573324 2.178699  
H -0.060241 -3.371935 1.158989  
H -2.410858 -2.964497 0.934240  
H -2.723119 -3.181476 2.656868  
H -2.661192 -0.680268 1.559137  
H -2.142782 -0.966972 3.200721

<sup>4</sup>TSS-6B-01

Geometry with 79 atoms:

Total energy: -3195.929274260

Cr -0.008213 -0.333025 1.165170  
P -1.510528 0.407374 -0.722646  
P 1.580232 0.012145 -0.718196  
O 0.020774 2.323158 0.969091  
O 0.087533 -2.483506 -0.302304  
C 0.775516 0.748142 -2.234349  
C -0.642782 0.189203 -2.357099  
H 0.740894 1.841287 -2.111891  
H 1.382407 0.528067 -3.125796  
H -1.210533 0.683990 -3.160055  
H -0.611575 -0.889680 -2.574973  
C -1.732075 2.229925 -0.630000  
C -2.679400 2.890959 -1.428026  
C -0.909715 2.996966 0.229423  
C -2.827255 4.277751 -1.378598  
H -3.320822 2.305024 -2.091042  
C -1.059883 4.390964 0.283661  
C -2.015403 5.020210 -0.518148  
H -3.572125 4.772904 -2.004885  
H -0.438187 4.993084 -0.944940  
H -2.121813 6.106439 -0.464341  
C -3.189758 -0.274531 -0.972612  
C -3.404995 -1.368895 -1.829275  
C -4.263988 0.213179 -0.205150  
C -4.672467 -1.951035 -1.926372  
H -2.590192 -1.775065 -2.431900  
C -5.528151 -0.370872 -0.307382  
H -4.113748 1.058679 0.470050  
C -5.735932 -1.454069 -1.167623  
H -4.828760 -2.794429 -2.603540  
H -6.355091 0.322745 0.288660  
H -6.726282 -1.908656 -1.247887  
C 2.070574 -1.658245 -1.307129  
C 3.225229 -1.882826 -2.071724  
C 1.229664 -2.755516 -1.006896  
C 3.563790 -3.164972 -2.509555  
H 3.875223 -1.040958 -2.320421  
C 1.571180 -4.044852 -1.435926  
C 2.736775 -4.241148 -2.181951  
H 4.468931 -3.321000 -3.100010  
H 0.938518 -4.898336 -1.194943  
H 2.993647 -5.251199 -2.510380  
C 3.128694 0.961411 -0.484514  
C 3.169861 2.340464 -0.758035  
C 4.254209 0.353294 0.102894  
C 4.315411 3.087266 -0.466599  
H 2.311609 2.850997 -1.198686  
C 5.396430 1.103155 0.390900  
H 4.242329 -0.713212 0.335378  
C 5.431399 2.472161 0.107004  
H 4.333427 4.156369 -0.692641  
H 6.263352 0.613288 0.840959  
H 6.326435 3.057053 0.332280  
C 0.863621 3.039004 1.868285  
H 1.524481 2.295914 2.329583  
H 1.482763 3.778384 1.335630  
H 0.273418 3.539590 2.653626  
C -0.881355 -3.509863 -0.098413  
H -1.748387 -3.026455 0.365741  
H -1.190819 -3.959220 -1.055796  
H -0.497000 -4.296274 0.571710  
C 1.801874 -0.593593 2.234945  
C 0.762094 -0.590831 3.238102  
C 0.452721 -1.854086 4.049307  
C -1.016561 -1.944452 4.481730  
C -1.968405 -2.053319 3.280703  
C -1.932116 -0.856791 2.311450  
H 2.289181 -1.551231 2.008150  
H 2.483892 0.260219 2.187948  
H 0.698752 0.326913 3.845598  
H -0.513961 -0.526759 2.718855  
H 0.707819 -2.739988 3.440154  
H 1.118682 -1.878562 4.928607  
H -1.278016 -1.054722 5.084713  
H -1.154099 -2.816123 5.141983  
H -1.713011 -2.973296 2.723856  
H -3.001962 -2.199328 3.642977  
H -2.527828 -1.096590 1.423183  
H -2.389270 0.037780 2.770675

<sup>4</sup>TSS-6B-02

Geometry with 79 atoms:

Total energy: -3195.929479560  
Cr -0.027093 0.044851 1.210422  
P 1.429084 -0.309350 -0.800854  
P -1.656865 -0.000442 -0.636083  
O 0.103007 -2.508936 0.672524  
O -0.191425 2.508018 -0.068566  
C -0.910698 -0.642674 -2.223395  
C 0.484742 -0.034558 -2.385447  
H -0.840901 -1.738914 -2.150377  
H -1.565276 -0.401784 -3.074819  
H 1.030538 -0.479613 -3.231379  
H 0.413536 1.049590 -2.562466  
C 1.839771 -2.096944 -0.891269  
C 2.839585 -2.585917 -1.746515  
C 1.105606 -3.016713 -0.105459  
C 3.132885 -3.949027 -1.811849  
H 3.405907 -1.883812 -2.363189  
C 1.404987 -4.385238 -0.161133  
C 2.415795 -4.841129 -1.011357  
H 3.917263 -4.310369 -2.479945  
H 0.854842 -5.100876 0.448530  
H 2.638466 -5.910418 -1.046027  
C 3.008106 0.597614 -0.995702  
C 3.016271 1.860277 -1.617676  
C 4.198060 0.120121 -0.414624  
C 4.188179 2.619517 -1.665210  
H 2.108852 2.264559 -2.070284  
C 5.365704 0.886018 -0.460678  
H 4.222342 -0.859902 0.066012  
C 5.365092 2.136603 -1.085372  
H 4.180181 3.593577 -2.160692  
H 6.281738 0.498905 -0.007938  
H 6.280525 2.731930 -1.123294  
C -2.166517 1.699248 -1.104078  
C -3.330694 1.944510 -1.848418  
C -1.343195 2.793123 -0.744571  
C -3.698004 3.241482 -2.211710  
H -3.966663 1.105275 -2.139531  
C -1.716496 4.097756 -1.099517  
C -2.889276 4.313027 -1.828071  
H -4.610097 3.412344 -2.787157  
H -1.098723 4.949559 -0.817837  
H -3.166361 5.334783 -2.098948  
C -3.192832 -0.966933 -0.392404  
C -3.219032 -2.338098 -0.704986  
C -4.310253 -0.392444 0.241354  
C -4.344087 -3.111500 -0.404488  
H -2.362634 -2.817881 -1.182727  
C -5.432297 -1.169472 0.538218  
H -4.307930 0.667804 0.501858  
C -5.453284 -2.530353 0.216413  
H -4.352349 -4.174072 -0.659961  
H -6.294703 -0.707023 1.024561  
H -6.332664 -3.135762 0.449063  
C -0.612470 -3.361593 1.562366  
H 0.062410 -3.812060 2.308872  
H -1.347881 -2.726159 2.072357  
H -1.149217 -4.154588 1.017382  
C 0.669757 3.567477 0.333866  
H 1.527596 3.096899 0.827817  
H 1.033386 4.143238 -0.532688  
H 0.166332 4.246492 1.041638  
C -1.720843 0.733779 2.280584  
C -0.667774 0.583087 3.259345  
C 0.074995 1.805969 3.810411  
C 1.508402 1.485807 4.266402  
C 2.420889 0.969927 3.137699  
C 1.895249 -0.298589 2.448624  
H -1.999104 1.748452 1.969848  
H -2.567742 0.041885 2.332812  
H -0.834198 -0.196734 4.020369  
H 0.463172 -0.032718 2.781506  
H 0.103174 2.589246 3.031967  
H -0.504008 2.228955 4.649566  
H 1.466589 0.727480 5.070236  
H 1.956282 2.385929 4.718390  
H 2.548037 1.768744 2.383792  
H 3.431310 0.789955 3.547813  
H 2.566574 -0.619388 1.644555  
H 1.857751 -1.140688 3.164490

<sup>4</sup>TSS-6B-03

Geometry with 79 atoms:

Total energy: -3195.929164240  
Cr 0.003936 0.229882 1.172277  
P 1.491983 -0.363062 -0.772887  
P -1.594935 0.021923 -0.716334  
O 0.003525 -2.390792 0.819387  
O -0.112970 2.494270 -0.084661  
C -0.812431 -0.669048 -2.264511  
C 0.605045 -0.109413 -2.392716  
H -0.777277 -1.765004 -2.168095  
H -1.431888 -0.426874 -3.141522  
H 1.163272 -0.589877 -3.210792  
H 0.576576 0.973249 -2.594211  
C 1.772364 -2.179816 -0.751824  
C 2.746878 -2.779887 -1.565124  
C 0.967679 -3.005073 0.069916  
C 2.942682 -4.161668 -1.561980  
H 3.370706 -2.149527 -2.203573  
C 1.166811 -4.393571 0.078751  
C 2.151333 -4.960986 -0.734125  
H 3.708420 -4.609164 -2.198856  
H 0.561296 -5.039393 0.713182  
H 2.296287 -6.043924 -0.715747  
C 3.141101 0.396200 -1.004030  
C 3.284262 1.567600 -1.769703  
C 4.257144 -0.102425 -0.306520  
C 4.521502 2.213138 -1.850024  
H 2.434073 1.986445 -2.312199  
C 5.491392 0.545664 -0.391625  
H 4.165384 -1.005584 0.300507  
C 5.627558 1.703826 -1.163499  
H 4.620659 3.116915 -2.456354  
H 6.351052 0.142671 0.149370  
H 6.594397 2.208447 -1.230047  
C -2.046590 1.726804 -1.227672  
C -3.163539 1.995586 -2.033668  
C -1.218915 2.802822 -0.830485  
C -3.477943 3.299017 -2.422510  
H -3.803096 1.169520 -2.353252  
C -1.536805 4.113685 -1.211696  
C -2.663683 4.352977 -2.002796  
H -4.353606 3.489121 -3.046458  
H -0.914613 4.951186 -0.898688  
H -2.900835 5.379502 -2.292715  
C -3.167572 -0.896092 -0.524761  
C -3.231401 2.267623 -0.829287  
C -4.288369 -0.276950 0.059229  
C -4.396299 -2.996702 -0.572207  
H -2.375396 -2.783756 -1.268018  
C -5.450276 -1.009188 0.312321  
H -4.256942 0.783749 0.316195  
C -5.508515 -2.370579 -0.002894  
H -4.433098 -4.060032 -0.821970  
H -6.314252 -0.511770 0.759759  
H -6.418977 -2.941369 0.195046  
C -0.833651 3.168641 1.671788  
H -1.542259 -2.470023 2.132323  
H -1.401561 -3.919392 1.099547  
H -0.245835 -3.666080 2.460919  
C 0.832954 3.513908 0.231618  
H 1.680263 3.010510 0.710234  
H 1.188527 4.023650 -0.678178  
H 0.404853 4.253717 0.927833  
C -1.791639 0.405557 2.280132  
C -0.743688 0.288958 3.268214  
C -0.409987 1.456130 4.203391  
C 1.063795 1.477644 4.630463  
C 2.011098 1.702424 3.441591  
C 1.946319 0.623456 2.343274  
H -2.270158 1.386265 2.157377  
H -2.484965 -0.430750 2.153102  
H -0.684687 -0.687513 3.776130  
H 0.527472 0.269458 2.731657  
H -0.657053 2.405215 3.694344  
H -1.068446 1.397309 5.086717  
H 1.314598 0.524097 5.131944  
H 1.218996 2.270399 5.380284  
H 1.771036 2.684855 2.995509  
H 3.049140 1.787062 3.810366

H 2.534536 0.955044 1.479551  
H 2.397089 -0.322639 2.692464

<sup>4</sup>TSS-6B-04

Geometry with 79 atoms:

Total energy: -3195.927361330  
Cr -0.082863 -0.318600 1.233144  
P -1.414335 0.382606 -0.767872  
P 1.674314 -0.036873 -0.526488  
O -0.210339 2.198888 1.296983  
O 0.290454 -2.565652 -0.777598  
C 0.965507 0.578522 -2.151228  
C -0.472935 0.098987 -2.346173  
H 0.998362 1.678663 -2.098034  
H 1.606513 0.262390 -2.987542  
H -0.963972 0.620101 -3.182603  
H -0.495706 -0.80521 -2.548904  
C -1.529309 2.213947 -0.684895  
C -2.218464 2.934578 -1.674022  
C -0.889328 2.925540 0.356428  
C -2.286308 4.327206 -1.641425  
H -2.721497 2.388975 -2.476609  
C -0.956963 4.326548 0.392044  
C -1.652105 5.015698 -0.360390  
H -2.829545 4.869944 -2.417684  
H -0.464843 4.888650 1.184693  
H -1.694105 6.106895 -0.563726  
C -3.118650 -0.200828 -1.108228  
C -3.326098 -1.382036 -1.845560  
C -4.231965 0.455463 -0.551799  
C -4.615324 -1.892046 -2.019218  
H -2.486237 -1.915464 -2.295249  
C -5.518487 -0.061779 -0.724316  
H -4.100461 1.384080 0.007193  
C -5.714239 -1.236779 -1.455677  
H -4.760607 -2.805831 -2.600791  
H -6.372527 0.461646 -0.287619  
H -6.721429 -1.638118 -1.591088  
C 2.452318 -1.645155 -0.964688  
C 3.827082 -1.807020 -1.176603  
C 1.614092 -2.783287 -1.030628  
C 4.366986 -3.064274 -1.467621  
H 4.490924 -0.943543 -1.105163  
C 2.149919 -0.042521 -1.323746  
C 3.525658 -4.174094 -1.543733  
H 5.441564 -3.171475 -1.629715  
H 1.509521 -4.922562 -1.379820  
H 3.936594 -5.160625 -1.771618  
C 3.051748 1.136186 -0.226391  
C 3.826629 1.651698 -1.282295  
C 3.313714 1.568681 1.083702  
C 4.846753 2.570999 -1.025999  
H 3.641042 1.336175 -2.311197  
C 4.335145 2.488372 1.337769  
H 2.713685 1.186712 1.909917  
C 5.104079 2.989659 0.283824  
H 5.443496 2.962037 -1.853702  
H 4.529196 2.814272 2.362685  
H 5.902990 3.708576 0.481481  
C 0.267962 2.844714 2.474943  
H 1.078941 3.552919 2.242613  
H -0.549288 3.365721 2.999994  
H 0.660501 2.052719 3.125931  
C -0.607198 -3.663102 -0.693645  
C -0.731570 -4.158406 -1.671925  
H -0.271302 -4.405180 0.049583  
H -1.571496 -3.247120 -0.375627  
C 1.456608 -1.401143 2.232182  
C 0.307159 -1.450585 3.097780  
C -0.552707 -2.720124 3.173891  
C -2.019970 -2.447665 3.542666  
C -2.758367 -1.552944 2.529406  
C -2.099277 -0.179906 2.347376  
H 1.711579 -2.303804 1.657429  
H 2.338369 -0.842062 2.554773  
H 0.421799 -0.948768 4.072822  
H -0.719487 -0.628442 2.723546  
H -0.512085 -3.233911 2.196994  
H -0.099995 -3.413501 3.903698  
H -2.057168 -1.968373 4.538513  
H -2.552486 -3.407351 3.644554

H -2.806986 -2.072374 1.554195  
H -3.808544 -1.433315 2.852475  
H -2.648444 0.450544 1.639370  
H -2.099189 0.375195 3.304222

<sup>4</sup>T55-6B-05

Geometry with 79 atoms:

Total energy: -3195.926713080  
Cr 0.020294 -0.170181 1.155558  
P -1.588582 0.347307 -0.742711  
P 1.611215 0.056906 -0.732744  
O -0.455319 2.643954 0.433852  
O 0.578197 -2.529578 -0.247279  
C 0.685373 0.017885 -2.352899  
C -0.611977 0.824750 -2.260518  
H 1.330670 0.352214 -3.179835  
H 0.469910 -1.048153 -2.521846  
H -0.403650 1.897408 -2.135613  
H -1.234500 0.720151 -3.162034  
C -2.529375 1.873715 -0.360740  
C -3.887378 2.083164 -0.628897  
C -1.780508 2.910832 0.247166  
C -4.505242 3.288847 -0.280947  
H -4.470993 1.299928 -1.116020  
C -2.395898 4.116920 0.598953  
C -3.758895 4.294861 0.334781  
H -5.565421 3.439371 -0.495053  
H -1.826795 4.916763 1.072562  
H -4.235722 5.238076 0.612458  
C -2.790883 -0.923092 -1.281842  
C -2.561786 -1.701842 -2.430540  
C -3.890896 -1.237006 -0.459276  
C -3.415716 -2.761085 -2.751701  
H -1.716092 -1.495692 -3.088590  
C -4.745144 -2.292109 -0.787969  
H -4.086791 -0.652079 0.441322  
C -4.508613 -3.059376 -1.933101  
H -3.225265 -3.352981 -3.650368  
H -5.599049 -2.515907 -0.143917  
H -5.175899 -3.886262 -2.187723  
C 2.612490 -1.475767 -0.799519  
C 3.977142 -1.539675 -1.104053  
C 1.910363 -2.674384 -0.528326  
C 4.643738 -2.769051 -1.133378  
H 4.526252 -0.621773 -1.323304  
C 2.571890 -3.906088 -0.563041  
C 3.938876 -3.942821 -0.862644  
H 5.708608 -2.806445 -1.372371  
H 2.039179 -4.834153 -0.356301  
H 4.452335 -4.907102 -0.884314  
C 2.765382 1.474437 -0.829735  
C 3.805923 1.587755 0.112406  
C 2.564470 2.521569 -1.745381  
C 4.625364 2.718289 0.131358  
H 3.985634 0.785532 0.829493  
C 3.381140 3.656134 -1.716812  
H 1.768962 2.469530 -2.489790  
C 4.411657 3.759092 -0.778884  
H 5.434461 2.786047 0.862771  
H 3.210883 4.460884 -2.436226  
H 5.050554 4.645325 -0.759914  
C 0.410215 3.646061 0.954175  
H 1.421829 3.225021 0.922898  
H 0.384842 4.555544 0.331657  
H 0.148322 3.901744 1.994679  
C -0.259977 -3.679802 -0.184973  
H 0.003827 -4.326790 0.667338  
H -1.284668 -3.311532 -0.056779  
H -0.202590 -4.259206 -1.121172  
C 1.667777 0.368982 2.362276  
C 0.603406 0.064015 3.287829  
C 0.699210 -1.167269 4.195484  
C -0.656444 -1.830279 4.476123  
C -1.318629 -2.358992 3.194893  
C -1.671029 -1.270209 2.166493  
H 2.517182 -0.324665 2.316930  
H 1.947692 1.416657 2.216070  
H 0.139714 0.931472 3.784998  
H -0.586621 -0.366438 2.669605  
H 1.369970 -1.906306 3.721678  
H 1.184123 -0.869122 5.140733

H -1.329834 -1.104153 4.968607  
H -0.518532 -2.657802 5.190768  
H -0.632942 -3.088092 2.725814  
H -2.230244 -2.926346 3.455154  
H -1.982550 -1.737343 1.224413  
H -2.512538 -0.647967 2.516495

<sup>4</sup>T55-6B-06

Geometry with 79 atoms:

Total energy: -3195.925347090  
Cr -0.099970 -0.706696 1.054072  
P -1.576040 0.253063 -0.712510  
P 1.502505 0.234901 -0.616095  
O -0.960508 1.560896 1.871257  
O 0.791383 -2.404600 -1.394436  
C 0.694440 0.656937 -2.267066  
C -0.743611 0.142232 -2.370807  
H 0.703464 1.755679 -2.320955  
H 1.315847 0.278935 -3.092316  
H -1.315508 0.697168 -3.129923  
H -0.760649 -0.920214 -2.648924  
C -1.621791 2.052612 -0.353957  
C -1.961161 2.992171 -1.339643  
C -1.289553 2.511375 0.940834  
C -1.965555 4.359637 -1.062178  
H -2.233810 2.646592 -2.340203  
C -1.293249 3.883897 1.224001  
C -1.628460 4.797074 0.221125  
H -2.231110 5.077570 -1.840690  
H -1.032092 4.251428 2.215727  
H -1.624143 5.864988 0.452424  
C -3.314117 -0.234269 -1.017192  
C -4.381986 0.494582 -0.467504  
C 3.586737 -1.419277 -1.725839  
C -5.697159 0.052856 -0.636749  
H -4.190160 1.415087 0.088441  
C 4.903150 -1.853679 -1.896303  
H -2.772482 -2.010471 -2.153307  
C -5.961305 -1.118981 -1.351668  
H -6.519830 0.631277 -0.209111  
H -5.103098 -2.770918 -2.455718  
H -6.990705 -1.460641 -1.483957  
C 2.702532 -1.103496 -0.992080  
C 4.090844 -0.989274 -0.850628  
C 2.154659 -2.358051 -1.346030  
C 4.927227 -2.085422 -1.091264  
H 4.529836 -0.038643 -0.544349  
C 2.986229 -3.454683 -1.595538  
C 4.372764 -3.308149 -1.469393  
H 6.008341 -1.978578 -0.980902  
H 2.568223 -4.420423 -1.878873  
H 5.018778 -4.167560 -1.664424  
C 2.490186 1.744715 -0.293412  
C 3.387427 2.245680 -1.255998  
C 2.274030 2.475393 0.884069  
C 4.067981 3.443108 -1.028444  
C 3.558352 1.699968 -2.187372  
C 2.953588 3.676554 1.107817  
H 1.559149 2.109715 1.619437  
C 3.854007 4.159289 0.155178  
H 4.766508 3.821073 -1.779003  
H 2.775077 4.237594 2.028421  
H 4.387268 5.096924 0.330422  
C -0.805149 1.936828 3.238590  
H -0.669434 1.005749 3.802319  
H 0.079344 2.578776 3.384534  
H -1.703941 2.454039 3.610638  
C 0.136055 -3.617709 -1.733715  
H 0.375598 -3.927667 -2.765153  
H 0.398461 -4.430388 -1.036325  
H -0.940946 -3.420570 -1.655739  
C 1.628926 -0.744568 2.283248  
C 0.649206 -1.552816 2.970565  
C 0.811073 -3.075393 3.021179  
C -0.527520 -3.820639 3.108089  
C -1.421133 -3.584448 1.880243  
C -1.819325 -2.116361 1.651961  
H 2.491957 -1.252832 1.837536  
H 1.873653 0.236584 2.703398  
H 0.255162 -1.137168 3.912388  
H -0.593813 -1.579799 2.364237

H 1.356928 -3.406679 2.119068  
H 1.451590 -3.334478 3.881628  
H -1.065622 -3.500925 4.019996  
H -0.338703 -4.900286 3.225268  
H -0.890399 -3.958019 0.985414  
H -2.332399 -4.203862 1.968518  
H -2.392664 -2.019604 0.723037  
H -2.478005 -1.754896 2.462225

<sup>4</sup>T55-6B-07

Geometry with 79 atoms:

Total energy: -3195.925735870  
Cr 0.022448 0.162231 1.187091  
P 1.485485 -0.346093 -0.792215  
P -1.600263 0.024183 -0.688656  
O 0.024014 -2.418173 0.755809  
O -0.159135 2.528179 -0.022481  
C -0.832789 -0.643793 -2.255184  
C 0.578845 -0.071947 -2.396140  
H -0.787144 -1.740463 -2.171482  
H -1.465911 -0.397176 -3.121024  
H 1.128580 -0.535489 -3.229572  
H 0.541227 1.014103 -2.578627  
C 1.798125 -2.158811 -0.802070  
C 2.788669 -2.729042 -1.615850  
C 1.004809 -3.006517 0.006063  
C 3.011301 -4.106916 -1.624990  
H 3.403446 -2.080112 -2.244369  
C 1.231033 -4.390443 0.003230  
C 2.231525 -4.929951 -0.809480  
H 3.789151 -4.533061 -2.261819  
H 0.634798 -5.053763 0.628487  
H 2.398104 -6.009899 -0.800811  
C 3.114133 4.589919 -1.003546  
C 3.218026 1.662353 -1.724797  
C 4.247744 -0.030390 -0.328721  
C 4.432867 2.351117 -1.781141  
H 2.353473 2.071991 -2.250871  
C 5.459433 0.661679 -0.388681  
H 4.190079 -0.961315 0.238678  
C 5.556025 1.853181 -1.114159  
H 4.500999 3.279815 -2.353168  
H 6.333113 0.266013 0.135001  
H 6.505423 2.392049 -1.160607  
C -2.073432 1.727971 -1.180207  
C -3.192464 1.980378 -1.989154  
C -1.266333 2.816049 -0.773196  
C -3.529940 3.278738 -2.374205  
H -3.815967 1.144142 -2.314063  
C -1.607908 4.122433 -1.153189  
H -2.735545 4.344915 -1.947608  
H -4.406879 3.455220 -3.000332  
H -1.003057 4.971098 -0.836766  
H -2.988973 5.368316 -2.234890  
C -3.166916 -0.904862 -0.494734  
C -3.232591 -2.269837 -0.826803  
C -4.281903 -0.299308 0.114220  
C -4.393369 -3.005964 -0.570896  
H -2.381098 -2.775145 -1.286409  
C -5.439683 -1.038460 0.366142  
H -4.248777 0.756433 0.091237  
C -5.499580 -2.393363 0.324191  
H -4.431847 -4.063956 -0.842158  
H -6.299156 -0.551663 0.833495  
H -6.406859 -2.969539 0.221149  
C -0.809820 -3.219226 1.589997  
H -0.224003 -3.708646 2.385599  
H -1.541348 -2.538342 2.041685  
H -1.351307 -3.978562 1.003976  
C 0.741895 3.578838 0.318638  
H 1.123961 4.085013 -0.582764  
H 0.264011 4.317385 0.982753  
H 1.581500 3.112537 0.845649  
C -1.729236 0.398431 3.324372  
C -0.682439 0.160343 3.297710  
C -0.299838 1.247946 4.330215  
C 0.979979 2.040294 4.009887  
C 2.157949 1.118878 3.660180  
C 1.989789 0.482404 2.266514  
H -2.138564 1.415777 2.256462  
H -2.482846 -0.380731 2.176860



H -0.696998 -0.853152 3.726519  
H 0.590643 0.086261 2.741537  
H -1.147030 1.942223 4.451449  
H -0.159348 0.752609 5.304896  
H 1.227835 2.677423 4.874132  
H 0.794578 2.727502 3.163081  
H 3.107001 1.681128 3.699304  
H 2.238285 0.334605 4.435482  
H 2.300768 1.215011 1.506638  
H 2.623848 -0.408819 2.142279

<sup>4</sup>Ts5-6B-08

Geometry with 79 atoms:

Total energy: -3195.925646660

Cr -0.139201 -0.725334 1.031360  
P -1.543862 0.367040 -0.720427  
P 1.525297 0.166905 -0.609328  
O -0.815974 1.596898 1.874054  
O 0.576588 -2.444004 -1.202062  
C 0.749782 0.684614 -2.247770  
C -0.702383 0.218431 -2.372641  
H 0.792004 1.784011 -2.259499  
H 1.362576 0.318176 -3.084582  
H -1.246620 0.786465 -3.142674  
H -0.751496 -0.845542 -2.644155  
C -1.466276 2.160169 -0.338743  
C -1.749301 3.135697 -1.307421  
C -1.085665 2.577436 0.956836  
C -1.651653 4.496104 -1.013070  
H -2.056697 2.825385 -2.309532  
C -0.986741 3.943004 1.256978  
C -1.267465 4.891427 0.270752  
H -1.874547 5.241381 -1.779166  
H -0.686230 4.274567 2.250308  
H -1.183476 5.953140 0.515177  
C -3.306175 0.003264 -1.052024  
C -3.645665 -1.151634 -1.780928  
C -4.330862 0.796509 -0.509869  
C -4.985228 -1.493939 -1.978514  
H -2.864816 -1.789216 -2.203583  
C -5.669833 0.447070 -0.706685  
H -4.085041 1.695702 0.059728  
C -6.000191 -0.695418 -1.441471  
H -5.237190 -2.388338 -2.553700  
H -6.459049 1.074715 -0.285441  
H -7.048018 -0.964159 -1.595697  
C 2.600802 -1.261044 -1.037837  
C 4.000178 -1.235995 -1.043585  
C 1.940257 -2.483028 -1.301610  
C 4.735250 -2.388931 -1.342714  
H 4.527982 -0.310932 -0.807779  
C 2.668726 -3.635621 -1.610879  
C 4.067525 -3.578247 -1.633742  
H 5.826623 -2.351927 -1.346877  
H 2.163689 -4.577186 -1.825693  
H 4.633449 -4.481481 -1.874346  
C 2.633413 1.581211 -0.258037  
C 3.517048 2.071536 -1.238296  
C 2.534560 2.252878 0.969825  
C 4.302717 3.196176 -0.979337  
H 3.592383 1.575708 -2.209492  
C 3.319788 3.380990 1.225142  
H 1.830013 1.900581 1.722351  
C 4.207825 3.850613 0.254333  
H 4.989544 3.566190 -1.744502  
H 3.233120 3.896443 2.184803  
H 4.822751 4.731479 0.454610  
C -0.646685 1.948939 3.245668  
H -0.573809 1.006049 3.801116  
H 0.274322 2.533771 3.404277  
H -1.514648 2.517006 3.617211  
C -0.191278 -3.586436 -1.555447  
H 0.044146 -4.449663 -0.911550  
H -1.243528 -3.311555 -1.407724  
H -0.029761 -3.862763 -2.611149  
C 1.597223 -0.977005 2.223985  
C 0.539000 -1.650094 2.939874  
C 0.520530 -3.178961 3.038361  
C -0.896922 -3.751156 3.173057  
C -1.764930 -3.468556 1.937018  
C -1.976933 -1.976943 1.623197

H 2.370236 -1.595758 1.752629  
H 1.986618 -0.042521 2.640271  
H 0.207808 1.165963 3.872812  
H -0.700209 -1.575673 2.327414  
H 1.002706 -3.600875 2.138019  
H 1.143729 -3.484609 3.896139  
H -1.380392 -3.322262 4.070749  
H -0.840731 -4.838657 3.343494  
H -1.290737 -3.954810 1.065952  
H -2.746724 -3.961186 2.058716  
H -2.502220 -1.870548 0.667032  
H -2.617007 -1.497825 2.385649

<sup>4</sup>Ts5-6B-09

Geometry with 79 atoms:

Total energy: -3195.925642750

Cr -0.057273 -0.414013 1.129155  
P 1.554049 0.013927 -0.718518  
P -1.514373 0.161844 -0.718647  
O 0.162399 -2.544791 -0.488699  
O -0.045250 2.187581 1.198051  
C -0.678956 0.181386 -2.368106  
C 0.751111 0.714123 -2.258541  
H -0.677749 -0.897194 -2.588336  
H -1.244952 0.691425 -3.162668  
H 1.355389 0.459080 -3.142093  
H 0.731338 1.810518 -2.171536  
C 2.180799 -1.609290 -1.304346  
C 3.402811 -1.760022 -1.975879  
C 1.369286 -2.749932 -1.101090  
C 3.836122 -3.014218 -2.412343  
H 4.028941 -0.883658 -2.155847  
C 1.804245 -4.010332 -1.531354  
C 3.036275 -4.134440 -2.180329  
H 4.792656 -3.113384 -2.929555  
H 1.193189 -4.897246 -1.368282  
H 3.366053 -5.122604 -2.510300  
C 3.011885 1.076628 -0.402969  
C 2.945671 2.461481 -0.639887  
C 4.158221 0.550430 0.222473  
C 4.007953 3.294891 -0.277535  
H 2.064488 2.908294 -1.103838  
C 5.217132 1.387015 0.582217  
H 4.226788 -0.518889 0.430743  
C 5.146450 2.761240 0.332812  
H 3.943255 4.367543 -0.476673  
H 6.101858 0.960676 1.061341  
H 5.976825 3.413738 0.613245  
C -1.616717 2.245116 -0.585875  
C -2.426985 2.985802 -1.461611  
C -0.835470 2.935494 0.371479  
C -2.477276 4.378614 -1.400128  
H -3.036765 2.457787 -2.199279  
C -0.885512 4.336832 0.434734  
C -1.703025 5.046376 -0.448199  
H -3.115835 4.936614 -2.087946  
H -0.293627 4.882315 1.168543  
H -1.731748 6.136920 -0.384879  
C -3.230835 -0.172900 -0.942533  
C -3.484451 -1.333259 -1.696501  
C -4.293879 0.440814 -0.256737  
C -4.778353 -1.855178 -1.777355  
H -2.676336 -1.839575 -2.228472  
C -5.585344 -0.085255 -0.340420  
H -4.117397 1.340065 0.337435  
C -5.831572 -1.232559 -1.100825  
H -4.963861 -2.751165 -2.374945  
H -6.403700 0.406061 0.191559  
H -6.843103 -1.640380 -1.166776  
C -0.773213 -3.615779 -0.404189  
H -0.978550 -4.042656 -1.399733  
H -0.416829 -4.411403 0.270224  
H -1.698896 -3.187785 -0.001783  
C 0.768303 2.836221 2.173902  
H 1.327106 2.044828 2.687500  
H 1.486493 3.524605 1.701824  
H 0.150384 3.379639 2.907458  
C 1.717116 -0.815323 2.181615  
C 0.668154 -0.858330 3.181249  
C 0.330349 -2.173723 3.923345  
C -0.993138 -2.845851 3.510446

C -2.150708 -1.841142 3.401202  
C -2.011519 -0.964666 2.141168  
H 2.186407 -1.765358 1.891741  
H 2.421847 0.021624 2.214145  
H 0.645639 0.022608 3.841108  
H -0.599354 -0.680353 2.668016  
H 1.162390 -2.884909 3.795670  
H 0.278649 -1.944820 5.000324  
H -1.229919 -3.638519 4.238166  
H -0.868343 -3.350589 2.534330  
H -3.117533 -2.373137 3.379725  
H -2.169543 -1.214130 4.312005  
H -2.325641 -1.561971 1.271200  
H -2.657371 -0.073778 2.180226

<sup>4</sup>Ts5-6B-10

Geometry with 79 atoms:

Total energy: -3195.927437870

Cr -0.060255 -0.408188 1.163099  
P 1.451232 -0.100445 -0.840991  
P -1.657599 0.019633 -0.671202  
O 0.230712 -2.663412 -0.323159  
O -0.402735 2.249250 0.915165  
C -0.911846 -0.421277 -2.520685  
C 0.485107 0.192374 -2.416600  
H -0.853089 -1.518321 -2.364985  
H -1.562094 -0.079046 -3.140899  
H 1.036383 -0.202879 -3.282809  
H 0.419014 1.286658 -2.531182  
C 2.263278 -1.735754 -1.085181  
C 3.590459 -1.897216 -1.503646  
C 1.511662 -2.887686 -0.752621  
C 4.160743 -3.169642 -1.612391  
H 4.194301 -1.018623 -1.737744  
C 2.077439 -4.162322 -0.857751  
C 3.400964 -4.294918 -1.292548  
H 5.196615 -3.276051 -1.941094  
H 1.502428 -5.052204 -0.602390  
H 3.836975 -5.293586 -1.373297  
C 2.771926 1.165095 -0.923906  
C 3.131242 1.850956 0.248017  
C 3.396887 1.510796 -2.136822  
C 4.104250 2.853706 0.213365  
H 2.645805 1.603334 1.191570  
C 4.368252 2.514273 -2.168564  
H 3.130089 0.998471 -3.063924  
C 4.724561 3.186092 -0.994173  
H 4.376040 3.377733 1.133087  
H 4.848386 2.773422 -3.115370  
H 5.484488 3.970955 -1.022178  
C -1.966541 1.822649 -0.822873  
C -2.868504 2.306312 -1.784654  
C -1.284128 2.748250 0.000374  
C -3.103215 3.672307 -1.938208  
H -3.406440 1.593332 -2.414656  
C -1.523219 4.123855 -0.149380  
C -2.426243 4.574916 -1.114249  
H -3.810280 4.028474 -2.690084  
H -1.008530 4.850152 0.478224  
H -2.599774 5.648869 -1.218106  
C -3.323386 -0.747257 -0.697973  
C -4.388562 -0.139269 -0.009299  
C -3.533456 -1.995081 -1.311433  
C -5.636840 -0.761869 0.054980  
H -4.245435 0.829531 0.474243  
C -4.785051 -2.615013 -1.243604  
H -2.726954 -2.496336 -1.850161  
C -5.838993 -2.001163 -0.561392  
H -6.456409 -0.274566 0.588821  
H -4.936097 -3.581092 -1.731795  
H -6.816850 -2.486095 -0.511576  
C -0.569565 -3.741689 0.148497  
H -0.087424 -4.256895 0.996335  
H -1.514352 -3.294716 0.484210  
H -0.779739 -4.467480 -0.654510  
C 0.239966 3.137914 1.822636  
H 0.866668 2.517460 2.473966  
H 0.882762 3.859594 1.293360  
H -0.495851 3.676491 2.442418  
C -1.835794 -0.423001 2.319788  
C -0.792488 -0.866447 3.213254

|                               |           |           |                               |           |           |                               |           |           |
|-------------------------------|-----------|-----------|-------------------------------|-----------|-----------|-------------------------------|-----------|-----------|
| C -0.275832                   | 0.037892  | 4.337486  | C 1.719717                    | 0.232334  | 2.339481  | H -1.196786                   | -3.433995 | -1.110372 |
| C 1.177102                    | -0.268977 | 4.731920  | C 0.763274                    | -0.471733 | 3.205956  | H -0.063347                   | -4.047314 | -2.359304 |
| C 2.181873                    | -0.042995 | 3.587998  | C 1.072444                    | -1.793130 | 3.805520  | C 1.580230                    | -1.281262 | 0.2091598 |
| C 1.907397                    | -0.882842 | 2.329731  | C -0.185482                   | -2.641651 | 4.034655  | C 0.477504                    | -1.543331 | 2.993753  |
| H -2.224580                   | 0.595953  | 2.443016  | C -0.907195                   | -2.979391 | 2.721163  | C 0.175026                    | -2.985912 | 3.466963  |
| H -2.594270                   | -1.148255 | 2.008308  | C -1.423827                   | -1.761378 | 1.932499  | C -0.915314                   | -3.727799 | 2.676289  |
| H -0.848398                   | -1.926198 | 3.511059  | H 2.645988                    | -0.306859 | 2.106182  | C -2.210818                   | -2.909304 | 2.577749  |
| H 0.438973                    | -0.993502 | 2.620553  | H 1.865461                    | 1.314160  | 2.428907  | C -2.061552                   | -1.722359 | 1.609563  |
| H -0.357916                   | 1.091776  | 4.015844  | H 0.230933                    | 0.238137  | 3.913585  | H 2.074599                    | -2.145587 | 1.629158  |
| H -0.939181                   | -0.068787 | 5.212918  | H -0.391634                   | -0.851790 | 2.561654  | H 2.278781                    | -0.477065 | 2.341036  |
| H 1.244203                    | -1.319464 | 5.070841  | H 1.758570                    | -2.333269 | 3.128602  | H 0.377721                    | -0.801557 | 3.799956  |
| H 1.461006                    | 0.350803  | 5.598090  | H 1.620010                    | -1.648865 | 4.752440  | H -0.789153                   | -1.375249 | 2.395620  |
| H 2.171940                    | 1.031063  | 3.323360  | H -0.875467                   | -2.101327 | 4.709729  | H 1.110211                    | -3.568778 | 3.453148  |
| H 3.202941                    | -0.244672 | 3.959126  | H 0.088318                    | -3.573616 | 4.555457  | H -0.146756                   | -2.935703 | 4.520149  |
| H 2.641768                    | -0.662002 | 1.546274  | H -0.208130                   | -3.547828 | 2.081613  | H -1.105244                   | -4.698315 | 3.162322  |
| H 2.024002                    | -1.959111 | 2.553028  | H -1.748640                   | -3.664761 | 2.928823  | H -0.554082                   | -3.958551 | 1.656213  |
|                               |           |           | H -1.763049                   | -2.089835 | 0.942723  | H -3.045455                   | -3.552591 | 2.248708  |
|                               |           |           | H -2.289621                   | -1.295790 | 2.435111  | H -2.483561                   | -2.551956 | 3.587912  |
|                               |           |           |                               |           |           | H -2.142036                   | -2.103758 | 0.577993  |
|                               |           |           |                               |           |           | H -2.852253                   | -0.967973 | 1.740144  |
| 4TS5-6B-11                    |           |           | 4TS5-6B-12                    |           |           | 4TS5-6C-01                    |           |           |
| Geometry with 79 atoms:       |           |           | Geometry with 79 atoms:       |           |           | Geometry with 83 atoms:       |           |           |
| Total energy: -3195.926574560 |           |           | Total energy: -3195.922380410 |           |           | Total energy: -3124.185817810 |           |           |
| Cr 0.084394                   | -0.280674 | 1.094958  | Cr -0.138180                  | -0.715394 | 1.019227  | Cr -0.006356                  | -0.038947 | 1.288896  |
| P -1.535760                   | 0.145370  | -0.787513 | P -1.502464                   | 0.375780  | -0.770432 | P 1.637597                    | 0.414958  | -0.532893 |
| P 1.616956                    | 0.435416  | -0.700087 | O -1.336440                   | 1.975953  | 1.543782  | P -1.461080                   | -0.042152 | -0.751939 |
| O -1.336440                   | 1.975953  | 1.543782  | O 1.290866                    | -2.351378 | -0.657047 | C -0.537210                   | 0.609368  | -2.235589 |
| O 1.290866                    | -2.351378 | -0.657047 | C 0.787779                    | 0.245550  | -2.365086 | C 0.888921                    | 0.060602  | -2.205637 |
| C 0.787779                    | 0.245550  | -2.365086 | C -0.629235                   | 0.821807  | -2.277264 | H -1.061009                   | 0.348380  | -3.166296 |
| C -0.629235                   | 0.821807  | -2.277264 | H 1.378090                    | 0.747712  | -3.146655 | H -0.537648                   | 1.707499  | -2.171838 |
| H 1.378090                    | 0.747712  | -3.146655 | H 0.777088                    | -0.830368 | -2.589232 | H 0.890898                    | -1.030717 | -2.341381 |
| H 0.777088                    | -0.830368 | -2.589232 | H -0.591152                   | 1.913125  | -2.129547 | H 1.507584                    | 0.482669  | -3.011270 |
| H -0.591152                   | 1.913125  | -2.129547 | H -1.210813                   | 0.639096  | -3.194190 | C 3.228613                    | -1.508152 | -0.499451 |
| H -1.210813                   | 0.639096  | -3.194190 | C -2.712962                   | 1.469868  | -0.328628 | C 3.211828                    | -1.914614 | -0.328529 |
| C -2.712962                   | 1.469868  | -0.328628 | C -3.845698                   | 1.743653  | -1.111181 | C 4.457572                    | 0.173509  | -0.556064 |
| C -3.845698                   | 1.743653  | -1.111181 | C -2.460612                   | 2.261268  | 0.816495  | C 4.440540                    | -2.587979 | -2.395554 |
| C -2.460612                   | 2.261268  | 0.816495  | C -4.724857                   | 2.773250  | -0.773535 | C 5.665389                    | -0.519645 | -0.467281 |
| C -4.724857                   | 2.773250  | -0.773535 | H -4.045147                   | 1.129707  | -1.992831 | C 5.656466                    | -1.907442 | -0.309787 |
| H -4.045147                   | 1.129707  | -1.992831 | C -3.347374                   | 3.292647  | 1.159738  | H 4.438063                    | -3.672846 | -0.100987 |
| C -3.347374                   | 3.292647  | 1.159738  | C -4.469116                   | 3.541248  | 0.364406  | H 6.609984                    | 0.027322  | -0.513906 |
| C -4.469116                   | 3.541248  | 0.364406  | H -5.602237                   | 2.972069  | -1.392295 | H 6.596175                    | -2.459736 | -0.232172 |
| H -5.602237                   | 2.972069  | -1.392295 | H -3.174698                   | 3.907842  | 2.041744  | C 2.037490                    | 2.206722  | -0.635645 |
| H -3.174698                   | 3.907842  | 2.041744  | H -5.149641                   | 4.348656  | 0.645500  | C 1.738128                    | 3.046634  | 0.450434  |
| H -5.149641                   | 4.348656  | 0.645500  | C -2.570141                   | -1.231777 | -1.415055 | C 2.601638                    | 2.772791  | -1.794170 |
| C -2.570141                   | -1.231777 | -1.415055 | C -3.758561                   | -1.581885 | -0.748072 | C 1.991916                    | 4.419511  | 0.381960  |
| C -3.758561                   | -1.581885 | -0.748072 | C -2.123124                   | -2.036584 | -2.478096 | H 1.296698                    | 2.633194  | 1.359180  |
| C -2.123124                   | -2.036584 | -2.478096 | C -4.488887                   | -2.703795 | -1.147091 | C 2.855213                    | 4.144283  | -1.861257 |
| C -4.488887                   | -2.703795 | -1.147091 | H -4.121944                   | -0.971742 | 0.081650  | H 2.858621                    | 2.144417  | -2.649415 |
| H -4.121944                   | -0.971742 | 0.081650  | C -2.856923                   | -3.159359 | -2.872401 | C 2.549471                    | 4.970729  | -0.774402 |
| C -2.856923                   | -3.159359 | -2.872401 | H -1.200177                   | -1.797349 | -3.009314 | H 1.751501                    | 5.058230  | 1.235235  |
| H -1.200177                   | -1.797349 | -3.009314 | C -4.040372                   | -3.496043 | -2.208613 | H 3.295782                    | 4.569394  | -2.766294 |
| C -4.040372                   | -3.496043 | -2.208613 | H -5.414106                   | -2.958916 | -0.624583 | H 2.747777                    | 6.043850  | -0.829944 |
| H -5.414106                   | -2.958916 | -0.624583 | H -2.501849                   | -3.771076 | -3.705474 | C -3.067094                   | 0.856108  | -0.727948 |
| H -2.501849                   | -3.771076 | -3.705474 | H -4.613199                   | -4.373168 | -2.519156 | C -3.106861                   | 2.234220  | -0.400504 |
| H -4.613199                   | -4.373168 | -2.519156 | C 3.009534                    | -0.751824 | -0.725794 | C -4.263950                   | 0.165104  | -0.995050 |
| C 3.009534                    | -0.751824 | -0.725794 | C 4.367699                    | -0.419369 | -0.667172 | C -4.356808                   | 2.874806  | -0.391650 |
| C 4.367699                    | -0.419369 | -0.667172 | C 2.636452                    | -2.117197 | -0.679211 | C -5.493594                   | 0.823277  | -0.964095 |
| C 2.636452                    | -2.117197 | -0.679211 | C 5.345077                    | -1.419302 | -0.607504 | C -5.538823                   | 2.187510  | -0.668450 |
| C 5.345077                    | -1.419302 | -0.607504 | H 4.670768                    | 0.628737  | -0.656958 | H -4.397830                   | 3.942220  | -0.156123 |
| H 4.670768                    | 0.628737  | -0.656958 | C 3.609460                    | -3.119853 | -0.630767 | H -6.411645                   | 0.270216  | -1.176184 |
| C 3.609460                    | -3.119853 | -0.630767 | C 4.962540                    | -2.761043 | -0.599389 | H -6.494474                   | 2.717144  | -0.651290 |
| C 4.962540                    | -2.761043 | -0.599389 | H 6.401405                    | -1.145694 | -0.566146 | C -1.837105                   | -1.780066 | -1.234119 |
| H 6.401405                    | -1.145694 | -0.566146 | H 3.326799                    | -4.172138 | -0.605875 | C -2.172302                   | -2.131697 | -2.554444 |
| H 3.326799                    | -4.172138 | -0.605875 | H 5.720688                    | -3.546939 | -0.558460 | C -1.780445                   | -2.791598 | -0.260040 |
| H 5.720688                    | -3.546939 | -0.558460 | C 2.283101                    | 2.137660  | -0.774108 | C -2.440159                   | -3.461394 | -2.887507 |
| C 2.283101                    | 2.137660  | -0.774108 | C 3.193619                    | 2.539899  | -1.769446 | H -2.239419                   | -1.369949 | -3.333581 |
| C 3.193619                    | 2.539899  | -1.769446 | C 1.789786                    | 3.093454  | 0.128867  | C -2.054950                   | -4.120883 | -0.592854 |
| C 1.789786                    | 3.093454  | 0.128867  | C 3.618358                    | 3.868115  | -1.838761 | H -1.522490                   | -2.546405 | 0.770260  |
| C 3.618358                    | 3.868115  | -1.838761 | H 3.572730                    | 1.815950  | -2.495029 | C -2.384089                   | -4.458781 | -1.908106 |
| H 3.572730                    | 1.815950  | -2.495029 | C 2.211229                    | 4.424191  | 0.051982  | H -2.698239                   | -3.718740 | -3.917635 |
| C 2.211229                    | 4.424191  | 0.051982  | H 1.061883                    | 2.794884  | 0.883554  | H -2.008469                   | -4.892737 | 0.179148  |
| H 1.061883                    | 2.794884  | 0.883554  | C 3.129829                    | 4.811437  | -0.927046 | H -2.596072                   | -5.497893 | -2.171348 |
| C 3.129829                    | 4.811437  | -0.927046 | H 4.330139                    | 4.170262  | -2.610808 | C 1.775124                    | -0.034266 | 2.346911  |
| H 4.330139                    | 4.170262  | -2.610808 | H 1.819094                    | 5.159914  | 0.758527  | C 0.702019                    | -0.093913 | 3.099163  |
| H 1.819094                    | 5.159914  | 0.758527  | H 3.462845                    | 5.850564  | -0.985634 | C 0.450352                    | -1.371869 | 4.208751  |
| H 3.462845                    | 5.850564  | -0.985634 | C -1.046626                   | 2.752551  | 2.702869  | C -1.017165                   | -1.544221 | 4.623019  |
| C -1.046626                   | 2.752551  | 2.702869  | H -0.936281                   | 3.820219  | 2.452111  | C -1.964101                   | -1.693804 | 3.421154  |
| H -0.936281                   | 3.820219  | 2.452111  | H -1.827443                   | 2.630305  | 3.471831  | H -1.971165                   | -0.490403 | 2.461473  |
| H -1.827443                   | 2.630305  | 3.471831  | H -0.093896                   | 2.382585  | 3.098038  | H 2.351070                    | -0.948834 | 2.249625  |
| H -0.093896                   | 2.382585  | 3.098038  | C 0.793620                    | -3.682980 | -0.682753 | H -2.386446                   | 0.872252  | 2.378184  |
| C 0.793620                    | -3.682980 | -0.682753 | H -0.300746                   | -3.602431 | -0.677200 |                               |           |           |
| H -0.300746                   | -3.602431 | -0.677200 | H 1.112881                    | -4.208628 | -1.598385 |                               |           |           |
| H 1.112881                    | -4.208628 | -1.598385 | H 1.122206                    | -4.253979 | 0.201183  |                               |           |           |
| H 1.122206                    | -4.253979 | 0.201183  |                               |           |           |                               |           |           |

H 0.542327 0.823113 3.989315  
H -0.552747 -0.101301 2.839952  
H 0.767411 -2.244388 3.608472  
H 1.103130 -1.356158 5.097946  
H -1.328906 -0.673932 5.229911  
H -1.111760 -2.425438 5.277783  
H -1.683118 -2.610904 2.870208  
H -2.990714 -1.874203 3.787313  
H -2.643997 -0.679412 1.615386  
H -2.372709 0.401921 2.972999  
H 4.478702 1.258750 -0.663344  
H -4.239726 -0.899689 -1.232008  
C 1.936358 -2.729521 -0.238364  
C 1.686827 -3.629627 -1.454194  
H 1.067242 -2.063439 -0.097747  
H 1.978507 -3.355382 0.669751  
H 0.737598 -4.176113 -1.347109  
H 1.640198 -3.046263 -2.387291  
H 2.494975 -4.367929 -1.572735  
C -1.888258 3.053865 -0.017499  
C -1.814671 3.364028 1.483260  
H -1.908184 4.002533 -0.579615  
H -0.955288 2.558761 -0.320488  
H -2.712921 3.899789 1.826990  
H -1.739689 2.440683 2.079333  
H -0.939514 3.993562 1.708374

#### <sup>4</sup>T5-6C-02

Geometry with 83 atoms:

Total energy: -3124.185804030

Cr 0.013362 -0.057829 1.286653

P 1.599174 0.501808 -0.544271

P -1.478679 -0.082391 -0.748130

C -0.627638 0.790720 -2.153872

C 0.828661 0.332630 -2.238284

H -1.170543 0.641317 -3.099081

H -0.685437 1.865593 -1.924260

H 0.899109 -0.723717 -2.537324

H 1.396880 0.914584 -2.978602

C 3.205299 -0.385519 -0.645814

C 3.213735 -1.800468 -0.724793

C 4.420207 0.321508 -0.595752

C 4.456622 -2.449533 -0.799999

C 5.641604 -0.350431 -0.653861

C 5.658810 -1.742273 -0.768051

H 4.478347 -3.539449 -0.882578

H 6.575506 0.215126 -0.613808

H 6.608782 -2.279114 -0.826930

C 1.941204 2.306433 -0.454129

C 2.556246 3.008790 -1.507217

C 1.517648 3.019382 0.679598

C 2.743811 4.389750 -1.419128

H 2.901218 2.479875 -2.398773

C 1.704705 4.401617 0.767345

H 1.029720 2.484565 1.498373

C 2.319318 5.088288 -0.282851

H 3.225442 4.923892 -2.241706

H 1.367751 4.940688 1.655895

H 2.467921 6.168882 -0.218520

C -3.167543 0.638340 -0.670274

C -3.368924 1.906710 -0.073093

C -4.269308 -0.092743 -1.152040

C -4.681280 2.399579 0.008649

C -5.562672 0.421413 -1.062089

C -5.768811 1.673862 -0.477826

H -4.848931 3.375971 0.472325

H -6.406610 -0.158803 -1.442541

H -6.778624 2.083244 -0.394802

C -1.675258 -1.815367 -1.336871

C -1.775218 -2.841567 -0.379302

C -1.688031 -2.157271 -2.700527

C -1.880748 -4.176848 -0.775217

H -1.768878 -2.601682 0.684856

C -1.783720 -3.495057 -3.093842

H -1.625724 -1.385572 -3.469871

C -1.878283 -4.507125 -2.133769

H -1.959165 -4.961183 -0.018482

H -1.787050 -3.746183 -4.157289

H -1.951956 -5.552030 -2.444655

C 1.830734 -0.078503 2.381399

C 0.783981 -0.133329 3.374206

C 0.549285 -1.412684 4.188286  
C -0.909757 -1.593754 4.627878  
C -1.878412 -1.731315 3.441777  
C -1.912158 -0.509898 2.506038  
H 2.395855 -0.995484 2.174765  
H 2.450186 0.821788 2.315946  
H 0.649871 0.782913 3.972068  
H -0.486549 -0.131663 2.852424  
H 0.859309 -2.284229 3.583775  
H 1.217221 -1.394812 5.066045  
H -1.213728 -0.732051 5.250820  
H -0.988688 -2.483205 5.273565  
H -1.595896 -2.633367 2.866236  
H -2.895904 -1.929727 3.823836  
H -2.604584 -0.682445 1.673906  
H -2.297343 0.376064 3.042449  
H 4.418979 1.408613 -0.506645  
H -4.118246 -1.076907 -1.599033  
C 1.954342 -2.648794 -0.712015  
C 1.859680 -3.614203 0.476204  
H 1.896528 -3.224649 -1.651914  
H 1.056674 -2.014897 -0.708467  
H 1.867079 -3.069661 1.433865  
H 0.927077 -4.197067 0.421233  
H 2.698830 -4.326188 0.496110  
C -2.241843 2.771844 0.454332  
C -1.936679 3.988171 -0.429493  
H -1.323856 2.171249 0.578467  
H -2.506673 3.120503 1.466915  
H -2.816652 4.644732 -0.512729  
H -1.107237 4.578883 -0.011715  
H -1.655752 3.688146 -1.451414

#### <sup>4</sup>T5-6C-03

Geometry with 83 atoms:

Total energy: -3124.186783080

Cr -0.000121 -0.052039 1.330384

P 1.631759 0.411083 -0.495412

P -1.458688 -0.108729 -0.711513

C -0.557823 0.611648 -2.168714

C 0.883244 0.104330 -2.174731

H -1.087493 0.387913 -3.106895

H -0.590118 1.704040 -2.041532

H 0.918723 -0.980904 -2.350825

H 1.484699 0.573766 -2.967043

C 3.234726 -0.485511 -0.505311

C 3.239402 -1.894820 -0.362835

C 4.450548 0.217062 -0.578111

C 4.479221 -2.551092 -0.308942

C 5.669707 -0.459790 -0.525485

C 5.683113 -1.850192 -0.389867

H 4.495918 -3.638254 -0.191088

H 6.605734 0.100662 -0.583668

H 6.632196 -2.389541 -0.339767

C 2.000253 2.213346 -0.515280

C 1.795996 2.967313 0.653620

C 2.449880 2.871389 -1.674780

C 2.033763 4.344470 0.665662

H 1.448036 2.480224 1.567040

C 2.684629 4.248132 -1.662300

H 2.629181 2.312951 -2.595767

C 2.477050 4.987640 -0.493092

H 1.868803 4.914791 1.582822

H 3.033838 4.745553 -2.570389

H 2.660694 6.064729 -0.486798

C -3.104154 0.708312 -0.725635

C -3.239369 2.027171 -0.226954

H -4.234734 0.013326 -1.193120

C -4.518425 2.606544 -0.229980

C -5.493823 0.613364 -1.187068

C -5.634913 1.916809 -0.703445

H -4.637127 3.622858 0.156254

H -6.361951 0.061187 -1.554646

H -6.617488 2.394786 -0.688292

C -1.738750 -1.868617 -1.167357

C -1.780752 -2.320258 -2.497662

C -1.898770 -2.803096 -0.127713

C -1.974557 -3.675901 -2.778114

H -1.668118 -1.621367 -3.328388

C -2.097961 -4.156217 -0.410222

H -1.873406 -2.472457 0.912496

C -2.134082 -4.595716 -1.737248  
H -2.001756 -4.014067 -3.816712  
H -2.223078 -4.868512 0.408816  
H -2.284914 -5.654677 -1.960361  
C 1.786812 -0.232307 2.452902  
C 0.732174 -0.107507 3.430668  
C 0.311985 -1.302471 4.294887  
C -1.151293 -1.222101 4.752803  
C -2.149438 -1.272143 3.583621  
C -1.984449 -0.145024 2.548568  
H 2.221681 -1.225605 2.283060  
H 2.520516 0.574098 2.354492  
H 0.713757 0.844438 3.985915  
H -0.515800 0.033906 2.889247  
H 0.467956 -2.234080 3.720493  
H 0.986871 -1.360205 5.165609  
H -1.301581 -0.287194 5.324089  
H -1.363359 -2.047069 5.451813  
H -2.043886 -2.252202 3.082014  
H -3.178921 -1.255078 3.984276  
H -2.692082 -0.282366 1.722482  
H -2.226767 0.833647 3.000847  
H 4.449688 1.304302 -0.671934  
H -4.133159 -1.008663 -1.562883  
C 1.973724 -2.724876 -0.272902  
C 1.719599 -3.609330 -1.499099  
H 1.100154 -2.069260 -0.115877  
H 2.029579 -3.363663 0.625231  
H 0.774815 -4.163421 -1.391088  
H 1.660783 -3.012928 -2.423151  
H 2.530917 -4.341153 -1.635865  
C -2.074873 2.851405 0.285843  
C -1.646242 3.976019 -0.665327  
H -1.209541 2.198422 0.495552  
H -2.354988 3.291211 1.257771  
H -0.790430 4.532606 -0.253338  
H -1.350461 3.584451 -1.651113  
H -2.469765 4.687827 -0.831895

#### <sup>4</sup>T5-6C-04

Geometry with 83 atoms:

Total energy: -3124.185469250

Cr 0.060095 -0.390147 1.198060

P 1.633986 0.312918 -0.613730

P -1.568485 0.150392 -0.702711

C -0.581050 0.103846 -2.283210

C 0.680958 0.945665 -2.092616

H -0.314573 -0.942749 -2.498041

H -1.186940 0.469540 -3.125731

H 1.320099 0.923749 -2.987428

H 0.414619 1.997600 -1.907100

C 2.719975 -0.982707 -1.361268

C 2.649019 -2.360291 -1.047812

C 3.651358 -0.536278 -2.324006

C 3.525688 -3.236029 -1.718001

C 4.505539 -1.422390 -2.973359

C 4.441436 -2.785201 -2.665005

H 3.480830 -4.302720 -1.481136

H 5.220781 -1.051073 -3.710870

H 5.108404 -3.495138 -3.160256

C 2.759102 1.686795 -0.149337

C 2.257889 2.998255 -0.065937

C 4.072453 1.430107 0.279457

C 3.062673 4.033685 0.416195

H 1.233513 3.226348 -0.369192

C 4.872485 2.468626 0.763381

H 4.478283 0.417445 0.233411

C 4.372063 3.772138 0.831218

H 2.662959 5.049460 0.467145

H 5.893893 2.255694 1.088175

H 5.000535 4.582698 1.207856

C -2.282659 1.858597 -0.764584

C -2.038736 2.855620 0.208736

C -3.092922 2.157375 -1.878758

C -2.610718 4.126846 0.011633

C -3.650430 3.422046 -2.050416

C -3.401831 4.415500 -1.098625

H -2.427105 4.905177 0.757465

H -4.275520 3.630579 -2.921760

H -3.827916 5.414483 -1.219575

C -3.016973 -0.936980 -0.972100

C -4.156248 -0.745749 -0.168811  
C -2.991432 -2.009252 -1.879622  
C -5.248642 -1.607315 -0.276332  
H -4.196684 0.088126 0.537226  
C -4.089056 -2.870326 -1.982856  
H -2.123022 -2.183769 -2.517161  
C -5.217238 -2.672916 -1.182875  
H -6.129991 -1.444217 0.348634  
H -4.060671 -3.696946 -2.697033  
H -6.073120 -3.346963 -1.266148  
C 1.659688 0.115434 2.475937  
C 0.663136 -0.477745 3.331796  
C 0.912047 -1.827585 4.012522  
C -0.360959 -2.671129 4.171531  
C -0.971585 -3.061631 2.816440  
C -1.444595 -1.874076 1.958120  
H 2.588498 -0.439628 2.294678  
H 1.802739 1.201105 2.499450  
H 0.106937 0.225662 3.970916  
H -0.475158 -0.940787 2.644571  
H 1.652948 -2.395933 3.422755  
H 1.375659 -1.640438 4.995835  
H -1.104427 -2.109775 4.767664  
H -0.127860 -3.581549 4.746709  
H -0.216252 -3.638424 2.252659  
H -1.818625 -3.751925 2.976393  
H -1.679619 -2.217698 0.940932  
H -2.369306 -1.432060 2.365771  
H 3.718271 0.528991 -2.557983  
H -3.300092 1.382535 -2.621268  
C 1.659516 -2.986596 -0.086578  
C 0.399736 -3.526201 -0.775088  
H 1.378866 -2.274823 0.707768  
H 2.160428 -3.814061 0.440956  
H -0.186529 -2.718310 -1.237207  
H 0.662920 -4.241391 -1.569690  
H -0.255090 -4.042049 -0.056693  
C -1.268028 2.621613 1.491336  
C -2.140180 2.019742 2.600391  
H -0.851562 3.580099 1.838395  
H -0.385809 1.983161 1.304932  
H -2.538062 1.034123 2.310331  
H -1.570166 1.897984 3.534823  
H -3.000753 2.672798 2.813520

<sup>4</sup>TS5-6C-05  
Geometry with 83 atoms:

Total energy: -3124.186022830  
Cr 0.060975 -0.043337 1.244925  
P 1.629218 0.263278 -0.676837  
P -1.643065 0.081002 -0.672445  
C -0.736015 0.692116 -2.181932  
C 0.685709 0.126521 -2.284569  
H -1.325633 0.473121 -3.086258  
H -0.725701 1.787058 -2.075767  
H 0.664798 -0.949766 -2.513301  
H 1.253239 0.609000 -3.095879  
C 2.993998 -0.961768 -0.880185  
C 2.987682 -2.224609 -0.238653  
C 4.052586 -0.623639 -1.746308  
C 4.061186 -3.097720 -0.489779  
C 5.101603 -1.509868 -1.982945  
C 5.106496 -2.753645 -1.346033  
H 4.070795 -4.073541 0.003507  
H 5.913379 -1.226941 -2.657088  
H 5.926108 -3.456486 -1.514726  
C 2.471446 1.896332 -0.751649  
C 2.003546 2.946898 -1.558782  
C 3.581310 2.126149 0.083473  
C 2.624822 4.199990 -1.523463  
H 1.154819 2.808468 -2.229362  
C 4.201457 3.375687 0.111892  
H 3.975603 1.319720 0.704438  
C 3.721682 4.419089 -0.687501  
H 2.248374 5.005517 -2.158642  
H 5.066226 3.534238 0.760771  
H 4.206595 5.397861 -0.662419  
C -3.079098 1.237246 -0.558569  
C -3.156128 2.279889 0.396984  
C -4.111802 1.079743 -1.504194  
C -4.279145 3.125715 0.361431

C -5.211757 1.935280 -1.521249  
C -5.295739 2.963765 -0.579166  
H -4.351801 3.931850 1.096924  
H -6.001183 1.794745 -2.263340  
H -6.155045 3.638933 -0.574414  
C -2.414929 2.150950 -1.172438  
C -3.413120 -2.054799 -0.342560  
C -2.013516 -2.226420 -2.311987  
C -3.987306 -3.290844 -0.643227  
H -3.759700 -1.502724 0.533934  
C -2.589485 -3.466125 -2.608073  
H -1.252053 -1.831310 -2.985767  
C -3.572855 -4.003203 -1.773900  
H -4.765642 -3.697440 0.007042  
H -2.268263 -4.010316 -3.499530  
H -4.022218 -4.971313 -2.007652  
C 1.571196 0.903507 2.371043  
C 0.590388 0.482518 3.340310  
C 0.919061 -0.620575 4.352352  
C -0.283841 -1.507765 4.703552  
C -0.814824 -2.277115 3.484146  
C -1.353496 -1.386928 2.349072  
H 2.542715 0.394725 2.372881  
H 1.632093 1.963200 2.102185  
H -0.037311 1.281906 3.764794  
H -0.487948 -0.233125 2.780475  
H 1.727056 -1.252478 3.942813  
H 1.325588 -0.147774 5.262346  
H -1.091214 -0.884589 5.131182  
H 0.005851 -2.220951 5.491810  
H 0.000697 -2.910856 3.091290  
H -1.608883 -2.974876 3.803684  
H -1.513886 -1.995444 1.447792  
H -2.323803 -0.938296 2.619770  
H 4.062619 0.352681 -2.235810  
H -4.061282 0.267571 -2.233013  
C 1.859880 -2.720712 0.641632  
C 0.707818 -3.342814 -0.154781  
H 1.477629 -1.895698 1.272186  
H 2.257576 -3.461480 1.352686  
H -0.089468 -3.710522 0.509681  
H 0.257197 -2.613245 -0.842561  
H 1.062931 -4.190251 -0.761328  
C -2.072410 2.574929 1.413124  
C -0.897643 3.370545 0.828593  
H -1.707709 1.634790 1.861415  
H -2.512271 3.143434 2.247183  
H -0.143799 3.595341 1.599079  
H -0.391965 2.818574 0.020828  
H -1.243358 4.325551 0.403223

<sup>4</sup>TS5-6C-06  
Geometry with 83 atoms:

Total energy: -3124.185545200  
Cr 0.093748 -0.716412 1.016760  
P 1.554240 0.428707 -0.638451  
P -1.602677 0.059796 -0.714570  
C -0.672508 0.090214 -2.331291  
C 0.607401 0.916129 -2.187506  
H -0.441671 -0.956482 -2.581388  
H -1.309799 0.474613 -3.141038  
H 1.263676 0.790198 -3.061106  
H 0.364374 1.986174 -2.118102  
C 2.999165 -0.518884 -1.285349  
C 3.163444 -1.911865 -1.095077  
C 3.958392 0.199974 -2.028683  
C 4.309133 -2.523323 -1.637846  
C 5.080563 -0.429857 -2.561114  
C 5.259956 -1.801341 -2.356071  
H 4.450653 -3.597422 -1.488574  
H 5.814590 0.148508 -3.126933  
H 6.140462 -2.308693 -2.757833  
C 2.233231 2.004440 0.019795  
C 1.403964 3.138434 0.087624  
C 3.506017 2.055557 0.614705  
C 1.847890 4.304531 0.716275  
H 0.396878 3.123274 -0.333824  
C 3.945492 3.224702 1.241444  
H 4.161729 1.183069 0.591096  
C 3.120469 4.352491 1.292853  
H 1.191252 5.177322 0.754432

H 4.940294 3.251857 1.692800  
H 3.467636 5.264963 1.783537  
C -2.225495 1.792174 -0.557941  
C -2.098013 2.557892 0.626177  
C -2.851290 2.356545 -1.687158  
C -2.589680 3.875796 0.618365  
C -3.331088 3.664816 -1.670744  
C -3.193064 4.430580 -0.509881  
H -2.494413 4.476870 1.526581  
H -3.811714 4.081639 -2.558807  
H -3.560382 5.459314 -0.481380  
C -3.090973 -0.954349 -1.051592  
C -4.357413 -0.565041 -0.583699  
C -2.952672 -2.194886 -1.702253  
C -5.464664 -1.396535 -0.775039  
H -4.486867 0.393798 -0.077283  
C -4.063669 -3.018871 -1.895686  
H -1.977209 -2.528501 -2.064548  
C -5.321979 -2.622102 -1.432018  
H -6.445431 -1.080174 -0.411557  
H -3.944005 -3.975593 -2.409943  
H -6.190281 -3.267787 -1.583383  
C 1.659483 -0.267918 2.359124  
C 0.740930 -1.093319 3.105630  
C 1.133817 -2.502763 3.558792  
C -0.041583 -3.491140 3.561498  
C -0.620937 -3.713663 2.155221  
C -1.227508 -2.456256 1.505626  
H 2.637520 -0.690930 2.097768  
H 1.695193 0.806029 2.570171  
H 0.125234 -0.562966 3.849628  
H -0.360386 -1.553557 2.348258  
H 1.929081 -2.885108 2.895355  
H 1.577458 -2.432310 4.566305  
H -0.835468 -3.119627 4.235951  
H 0.291565 -4.454795 3.979141  
H 0.184365 -4.104456 1.507596  
H -1.387947 -4.507221 2.192726  
H -1.425638 -2.643208 0.440097  
H -2.195317 -2.196238 1.965490  
H 3.832364 1.274596 -2.180906  
H -2.979213 1.762383 -2.594861  
C 2.148178 -2.806823 -0.416279  
C 1.114744 -3.387964 -1.387301  
H 1.635015 -2.260006 0.392784  
H 2.675284 -3.631698 0.088311  
H 1.604007 -3.986701 -2.170841  
H 0.395729 -4.035749 -0.861840  
H 0.552337 -2.587395 -1.891465  
C -1.506387 2.019335 1.911158  
C -2.468228 1.105635 2.681014  
H -1.216990 2.865909 2.552320  
H -0.554760 1.499630 1.695746  
H -3.385022 1.650985 2.954591  
H -2.772235 0.232764 2.081804  
H -2.006064 0.735013 3.609554

<sup>4</sup>TS5-6C-07  
Geometry with 83 atoms:

Total energy: -3124.183615680  
Cr 0.027365 -0.202970 1.260825  
P 1.638277 0.192069 -0.607765  
P -1.591559 0.158968 -0.683387  
C -0.591113 0.029023 -2.247738  
C 0.696285 0.837791 -2.083143  
H -0.350370 -1.033959 -2.406745  
H -1.172260 0.368809 -3.117541  
H 1.322409 0.791459 -2.986596  
H 0.455914 1.897234 -1.902076  
C 2.493913 -1.303196 -1.290911  
C 2.321361 -2.621677 -0.809851  
C 3.382844 -1.064967 -2.361223  
C 3.050483 -3.653182 -1.434902  
C 4.085665 -2.101846 -2.966528  
C 3.917191 -3.408503 -2.496393  
H 2.928217 -4.675863 -1.067366  
H 4.768044 -1.890879 -3.793146  
H 4.467172 -4.234761 -2.953503  
C 3.018465 1.377647 -0.360998  
C 2.924976 2.728657 -0.734049  
C 4.179682 0.931011 0.296180

|                         |                 |           |           |
|-------------------------|-----------------|-----------|-----------|
| C                       | 3.972284        | 3.613055  | -0.454192 |
| H                       | 2.043140        | 3.111539  | -1.249724 |
| C                       | 5.221633        | 1.816637  | 0.573609  |
| H                       | 4.277308        | -0.118883 | 0.581955  |
| C                       | 5.120259        | 3.161470  | 0.200774  |
| H                       | 3.887731        | 4.659896  | -0.755939 |
| H                       | 6.118733        | 1.453860  | 1.081198  |
| H                       | 5.937181        | 3.854032  | 0.417222  |
| C                       | -2.368133       | 1.836348  | -0.814415 |
| C                       | -2.277771       | 2.840416  | 0.177229  |
| C                       | -3.124973       | 2.077714  | -1.981141 |
| C                       | -2.936928       | 4.063346  | -0.059374 |
| C                       | -3.762771       | 3.295814  | -2.193369 |
| C                       | -3.663788       | 4.298709  | -1.222861 |
| H                       | -2.876935       | 4.844974  | 0.703243  |
| H                       | -4.343227       | 3.458640  | -3.104415 |
| H                       | -4.164313       | 5.259107  | -1.369036 |
| C                       | -3.025041       | -0.963021 | -0.905550 |
| C                       | -4.125767       | -0.801356 | -0.043353 |
| C                       | -3.041709       | -2.006869 | -1.845576 |
| C                       | -5.217636       | -1.666401 | -0.120043 |
| H                       | -4.136180       | 0.012801  | 0.686012  |
| C                       | -4.139029       | -2.871649 | -1.918472 |
| H                       | -2.209929       | -2.155805 | -2.535828 |
| C                       | -5.225795       | -2.706206 | -1.056648 |
| H                       | -6.066685       | -1.527390 | 0.553539  |
| H                       | -4.142846       | -3.676000 | -2.658202 |
| H                       | -6.080773       | -3.384000 | -1.115761 |
| C                       | 1.640083        | 0.407658  | 2.475306  |
| C                       | 0.577208        | 0.092543  | 3.396682  |
| C                       | 0.701127        | -1.099358 | 4.352750  |
| C                       | -0.631138       | -1.814442 | 4.618073  |
| C                       | -1.225883       | -2.424925 | 3.339448  |
| C                       | -1.598212       | -1.398869 | 2.254663  |
| H                       | 2.508593        | -0.261820 | 2.447880  |
| H                       | 1.896324        | 1.455167  | 2.291207  |
| H                       | 0.069728        | 0.957148  | 3.853370  |
| H                       | -0.569132       | -0.421805 | 2.773047  |
| H                       | 1.420799        | -1.823005 | 3.930468  |
| H                       | 1.140883        | -0.740530 | 5.298622  |
| H                       | -1.352982       | -1.102291 | 5.059592  |
| H                       | -0.478462       | -2.605679 | 5.369542  |
| H                       | -0.494880       | -3.143836 | 2.925299  |
| H                       | -2.120006       | -3.020931 | 3.594647  |
| H                       | -1.845874       | -1.916459 | 1.318119  |
| H                       | -2.489032       | -0.818327 | 2.546739  |
| H                       | 3.538322        | -0.043275 | -2.716282 |
| H                       | -3.233530       | 1.288613  | -2.729329 |
| C                       | 1.364678        | -3.033413 | 0.290460  |
| C                       | 0.022698        | -3.543127 | -0.248459 |
| H                       | 1.201331        | -2.205898 | 1.004581  |
| H                       | 1.837536        | -3.828817 | 0.888522  |
| H                       | -0.637494       | -3.873796 | 0.567558  |
| H                       | -0.506451       | -2.762201 | -0.814097 |
| H                       | 0.174184        | -4.395317 | -0.928967 |
| C                       | -1.497029       | 2.722548  | 1.470801  |
| C                       | -0.122057       | 3.398074  | 1.405324  |
| H                       | -1.390385       | 1.665833  | 1.767699  |
| H                       | -2.087170       | 3.187672  | 2.277118  |
| H                       | 0.529276        | 2.917289  | 0.660022  |
| H                       | -0.219379       | 4.458152  | 1.124089  |
| H                       | 0.391565        | 3.352362  | 2.378083  |
| H                       | 5.850427        | -1.103068 | -2.687406 |
| H                       | 3.612514        | -4.295957 | -0.849249 |
| H                       | 5.611300        | -3.501044 | -2.135133 |
| C                       | 2.257916        | 1.443421  | 0.603703  |
| C                       | 1.560815        | 2.644570  | 0.823612  |
| C                       | 3.462194        | 1.213904  | 1.291948  |
| C                       | 2.069337        | 3.604161  | 1.702262  |
| H                       | 0.613061        | 2.840904  | 0.319421  |
| C                       | 3.965457        | 2.177597  | 2.169855  |
| H                       | 4.014586        | 0.284353  | 1.138454  |
| C                       | 3.272551        | 3.374357  | 2.376862  |
| H                       | 1.518607        | 4.535005  | 1.858849  |
| H                       | 4.905875        | 1.990451  | 2.694037  |
| H                       | 3.669314        | 4.125917  | 3.063626  |
| C                       | -1.994719       | 1.826224  | -0.341861 |
| C                       | -1.944047       | 2.271082  | 1.000670  |
| C                       | -2.326339       | 2.736516  | -1.364402 |
| C                       | -2.218040       | 3.625603  | 1.261584  |
| C                       | -2.589848       | 4.075814  | -1.082627 |
| C                       | -2.531795       | 4.522329  | 0.240782  |
| H                       | -2.179775       | 3.979541  | 2.295264  |
| H                       | -2.842303       | 4.765239  | -1.891502 |
| H                       | -2.734737       | 5.569499  | 0.478382  |
| C                       | -3.228831       | -0.537151 | -1.504826 |
| C                       | -4.454457       | -0.041968 | -1.028645 |
| C                       | -3.230898       | -1.578853 | -2.449679 |
| C                       | -5.658868       | -0.577531 | -1.494231 |
| H                       | -4.474605       | 0.772010  | -0.301243 |
| C                       | -4.437231       | -2.104134 | -2.918138 |
| H                       | -2.291438       | -1.988078 | -2.828577 |
| C                       | -5.653823       | -1.606474 | -2.440087 |
| H                       | -6.605813       | -0.182070 | -1.118795 |
| H                       | -4.426155       | -2.907575 | -3.658811 |
| H                       | -6.596596       | -2.020371 | -2.805692 |
| C                       | -1.803465       | -2.729658 | 0.542108  |
| C                       | -0.919859       | -3.262791 | 1.547157  |
| H                       | -1.359449       | -3.316406 | 3.014319  |
| C                       | -0.217925       | -3.076768 | 4.013355  |
| C                       | 0.421507        | -1.687874 | 3.858803  |
| C                       | 1.114284        | -1.463420 | 2.503472  |
| H                       | -2.794358       | -2.372371 | 0.846154  |
| H                       | -1.795228       | -3.174097 | -0.460359 |
| H                       | -0.308173       | -4.128299 | 1.244966  |
| H                       | 0.212804        | -2.441860 | 1.800024  |
| H                       | -2.145447       | -2.558407 | 3.176011  |
| H                       | -1.831934       | -4.295727 | 3.201627  |
| H                       | 0.557652        | -3.854540 | 3.883121  |
| H                       | -0.603309       | -3.194717 | 5.038912  |
| H                       | -0.360866       | -0.920418 | 4.004610  |
| H                       | 1.152179        | -1.525459 | 4.671169  |
| H                       | 1.461921        | -0.423815 | 2.419975  |
| H                       | 2.005633        | -2.106076 | 2.405214  |
| H                       | 1.898380        | -2.648604 | -0.127766 |
| H                       | -2.390051       | 2.394410  | -2.400050 |
| H                       | 3.229560        | 0.956045  | -2.155191 |
| C                       | 4.202779        | 1.181677  | -3.673115 |
| H                       | 5.226909        | 1.265206  | -1.771475 |
| H                       | 3.516605        | 1.620859  | -1.665082 |
| H                       | 4.974053        | 0.589347  | -4.189626 |
| H                       | 3.229345        | 0.894607  | -4.103385 |
| H                       | 4.379563        | 2.242367  | -3.911734 |
| C                       | -1.658867       | 1.358262  | 2.173798  |
| C                       | -2.875805       | 0.527137  | 2.599078  |
| H                       | -1.313148       | 1.965529  | 3.024168  |
| H                       | -0.802127       | 0.701117  | 1.936463  |
| H                       | -2.634064       | -0.117587 | 3.458544  |
| H                       | -3.708851       | 1.183733  | 2.894974  |
| H                       | -3.239113       | -0.114995 | 1.781258  |
| C                       | 2.681982        | -0.826973 | -1.557659 |
| C                       | 2.644249        | -2.226084 | -1.355058 |
| C                       | 3.509598        | -0.293742 | -2.569248 |
| C                       | 3.448871        | -3.036515 | -2.179809 |
| C                       | 4.292627        | -1.116013 | -3.373966 |
| C                       | 4.262064        | -2.500215 | -3.174602 |
| H                       | 3.430142        | -4.119299 | -2.027613 |
| H                       | 4.927830        | -0.679102 | -4.147953 |
| H                       | 4.875420        | -3.160302 | -3.792860 |
| C                       | 2.838102        | 1.726653  | -0.125905 |
| C                       | 4.189377        | 1.448451  | 0.140979  |
| C                       | 2.343970        | 3.020150  | 0.121667  |
| C                       | 5.033619        | 2.451333  | 0.624985  |
| H                       | 4.590763        | 0.447824  | -0.032245 |
| C                       | 3.193524        | 4.019884  | 0.602338  |
| H                       | 1.290372        | 3.258109  | -0.045565 |
| C                       | 4.540237        | 3.739040  | 0.853790  |
| H                       | 6.083678        | 2.222808  | 0.823420  |
| H                       | 2.798757        | 5.022941  | 0.782030  |
| H                       | 5.203201        | 4.521908  | 1.229966  |
| C                       | -2.049222       | 1.835035  | 0.011742  |
| C                       | -3.018891       | 2.588824  | -0.696033 |
| C                       | -1.351979       | 2.432166  | 1.082115  |
| C                       | -3.232177       | 3.920297  | -0.296422 |
| C                       | -1.581732       | 3.754125  | 1.459983  |
| C                       | -2.529609       | 4.503194  | 0.758389  |
| H                       | -3.971954       | 4.515960  | -0.838507 |
| H                       | -1.024205       | 4.192854  | 2.290573  |
| H                       | -2.722839       | 5.543386  | 1.032174  |
| C                       | -2.986872       | -0.911987 | -0.636249 |
| C                       | -3.949864       | -0.917727 | 0.388806  |
| C                       | -3.147965       | -1.771352 | -1.735922 |
| C                       | -5.061459       | -1.757924 | 0.307822  |
| H                       | -3.836889       | -0.253306 | 1.249633  |
| C                       | -4.262743       | -2.612257 | -1.811361 |
| H                       | -2.416119       | -1.787400 | -2.545964 |
| C                       | -5.220231       | -2.607147 | -0.793147 |
| H                       | -5.807814       | -1.748026 | 1.105342  |
| H                       | -4.383233       | -3.272308 | -2.673759 |
| H                       | -6.090537       | -3.264651 | -0.856333 |
| C                       | 1.909414        | 0.028853  | 2.479321  |
| C                       | 0.989991        | -0.640208 | 3.365002  |
| C                       | 1.341292        | -1.999647 | 3.977995  |
| C                       | 0.125958        | -2.919986 | 4.162252  |
| C                       | -0.537934       | -3.285216 | 2.825184  |
| C                       | -1.122012       | -2.088761 | 2.053592  |
| H                       | 2.856060        | -0.469687 | 2.235239  |
| H                       | 1.999399        | 1.119741  | 2.530798  |
| H                       | 0.433973        | 0.012037  | 4.057819  |
| H                       | -0.167808       | -1.130807 | 2.717129  |
| H                       | 2.081782        | -2.502715 | 3.330834  |
| H                       | 1.842195        | -1.826295 | 4.945489  |
| H                       | -0.613387       | -2.428424 | 4.821765  |
| H                       | 0.439137        | -3.839653 | 4.682083  |
| H                       | 0.212560        | -3.794466 | 2.193514  |
| H                       | -1.336820       | -4.027811 | 2.998947  |
| H                       | -1.414697       | -2.397980 | 1.040320  |
| H                       | -2.033005       | -1.705514 | 2.542543  |
| H                       | 3.551434        | 0.787832  | -2.719803 |
| H                       | -0.603056       | 1.850430  | 1.630054  |
| C                       | 1.753026        | -2.932328 | -0.354657 |
| C                       | 0.443154        | -3.445087 | -0.966118 |
| H                       | 1.542152        | -2.273101 | 0.506553  |
| H                       | 2.306251        | -3.783641 | 0.073342  |
| H                       | 0.646945        | -4.120360 | -1.811547 |
| H                       | -0.151834       | -3.999566 | -0.224823 |
| H                       | -0.178203       | -2.619680 | -1.345914 |
| C                       | -3.861688       | 2.054271  | -1.837398 |
| C                       | -5.340017       | 1.880426  | -1.461563 |
| H                       | -3.476314       | 1.093436  | -2.198293 |
| H                       | -3.785258       | 2.758142  | -2.683955 |
| H                       | -5.915238       | 1.503615  | -2.322000 |
| H                       | -5.456934       | 1.162003  | -0.636520 |
| H                       | -5.791288       | 2.834266  | -1.145924 |
| <sup>4</sup> Ts5-6C-08  |                 |           |           |
| Geometry with 83 atoms: |                 |           |           |
| Total energy:           | -3124.182956340 |           |           |
| Cr                      | -0.271635       | -1.293549 | 0.735566  |
| P                       | 1.512010        | 0.119182  | -0.421809 |
| P                       | -1.638817       | 0.080501  | -0.836074 |
| C                       | -0.535818       | 0.263982  | -2.327300 |
| C                       | 0.779560        | 0.944064  | -1.934618 |
| H                       | -0.347292       | -0.756871 | -2.698751 |
| H                       | -1.046893       | 0.810009  | -3.134050 |
| H                       | 1.498782        | 0.899930  | -2.763131 |
| H                       | 0.614568        | 2.007136  | -1.706652 |
| C                       | 2.882610        | -0.946262 | -1.023334 |
| C                       | 4.007951        | -0.488318 | -1.753762 |
| C                       | 2.763072        | -2.313957 | -0.707757 |
| C                       | 4.970229        | -1.440292 | -2.133048 |
| C                       | 3.726055        | -3.239930 | -1.104503 |
| C                       | 4.839129        | -2.794170 | -1.821592 |
| <sup>4</sup> Ts5-6C-09  |                 |           |           |
| Geometry with 83 atoms: |                 |           |           |
| Total energy:           | -3124.183027400 |           |           |
| Cr                      | 0.283665        | -0.529024 | 1.262871  |
| P                       | 1.673958        | 0.387636  | -0.594317 |
| P                       | -1.503388       | 0.126400  | -0.413859 |
| C                       | -0.695290       | 0.319704  | -2.081533 |
| C                       | 0.584030        | 1.143148  | -1.914239 |
| H                       | -0.457908       | -0.688154 | -2.457357 |
| H                       | -1.378356       | 0.790964  | -2.803180 |
| H                       | 1.141242        | 1.211716  | -2.860091 |
| H                       | 0.341475        | 2.170000  | -1.602823 |
| <sup>4</sup> Ts5-6C-10  |                 |           |           |
| Geometry with 83 atoms: |                 |           |           |
| Total energy:           | -3124.185168070 |           |           |
| Cr                      | 0.004871        | -0.654612 | 1.132485  |
| P                       | -1.591741       | -0.228321 | -0.757958 |
| P                       | 1.601404        | 0.092419  | -0.716340 |

C 0.653626 0.286548 -2.322892  
 C -0.621345 -0.559652 -2.316667  
 H 0.402429 1.350721 -2.443375  
 H 1.308078 0.011298 -3.162515  
 H -1.236268 -0.361797 -3.206986  
 H -0.385069 -1.635110 -2.327745  
 C -2.157361 1.516755 -1.002719  
 C -2.040178 2.515045 -0.007093  
 C -2.709627 1.850030 -2.255803  
 C -2.463223 3.819971 -0.319228  
 C -3.123775 3.149083 -2.542795  
 C -2.992779 1.442246 -1.567818  
 H -2.372770 4.597759 0.443906  
 H -3.547485 3.383658 -3.521979  
 H -3.308083 5.167131 -1.778283  
 C -3.107552 -1.243750 -0.936532  
 C -2.983479 -2.612819 -1.235961  
 C -4.384200 -0.707993 -0.700409  
 C -4.117071 -3.424025 -1.314411  
 H -2.000145 -3.058243 -1.406188  
 C -5.515662 -1.526857 -0.771676  
 H -4.502233 0.352069 -0.467058  
 C -5.386096 -2.883210 -1.081285  
 H -4.008156 -4.484272 -1.555627  
 H -6.503807 -1.097800 -0.588281  
 H -6.272136 -3.519939 -1.139779  
 C 3.033794 -0.968461 -1.198909  
 C 3.246301 -2.280308 -0.713066  
 C 3.931419 -0.418280 -2.138233  
 C 4.365590 -2.987210 -1.192328  
 C 5.030551 -1.139219 -2.597186  
 C 5.248939 -2.434138 -2.117000  
 H 4.541915 -4.001031 -0.822602  
 H 5.714892 -0.691167 -3.321363  
 H 6.109465 -3.012392 -2.462383  
 C 2.319004 1.747791 -0.372290  
 C 3.597184 1.875329 0.199892  
 C 1.518651 2.895522 -0.516730  
 C 4.069461 3.129015 0.597894  
 H 4.230631 0.996376 0.335538  
 C 1.995830 4.146112 -0.116965  
 H 0.511762 2.826076 -0.933111  
 C 3.272566 4.266918 0.440399  
 H 5.067721 3.214645 1.034112  
 H 1.363146 5.028301 -0.242416  
 H 3.645476 5.245398 0.752500  
 C -1.446785 -2.017283 1.823864  
 C -0.455511 -1.968310 2.869024  
 C -0.770895 -1.324072 4.222104  
 C 0.446152 -0.647095 4.868961  
 C 0.997665 0.510766 4.021366  
 C 1.519347 0.098551 2.632753  
 H -2.431018 -1.572695 2.014708  
 H -1.493756 -2.901485 1.178360  
 H 0.189442 -2.857197 2.960297  
 H 0.606167 -1.104964 2.592395  
 H -1.573999 -0.579545 4.086293  
 H -1.178337 -2.100218 4.891955  
 H 1.242344 -1.397778 5.030148  
 H 0.168318 -0.272907 5.867438  
 H 0.199942 1.266519 3.898522  
 H 1.806797 1.019635 4.574869  
 H 1.759122 0.993794 2.044129  
 H 2.448291 -0.491416 2.716048  
 H -2.829142 1.080391 -3.021376  
 H 3.773410 0.598280 -2.507345  
 C -1.546208 2.244265 1.396188  
 C -2.642174 1.685717 2.311328  
 H -1.144666 3.175297 1.824368  
 H -0.683239 1.554303 1.364897  
 H -3.492257 2.383225 2.368065  
 H -3.026429 0.723524 1.938004  
 H -2.264272 1.530882 3.333554  
 C 2.312623 -3.001963 0.236294  
 C 1.157757 -3.713519 -0.480683  
 H 1.913167 -2.303336 0.987665  
 H 2.892125 -3.745346 0.805851  
 H 1.537392 -4.441869 -1.214093  
 H 0.516641 -4.252732 0.234492  
 H 0.527518 -2.995831 -1.029104

<sup>4</sup>TS5-6C-11  
 Geometry with 83 atoms:  
 Total energy: -3124.184163600  
 Cr 0.006275 0.102385 1.244813  
 P 1.600144 0.260484 -0.678568  
 P -1.619739 0.050074 -0.720931  
 C -0.624277 -0.037929 -2.298385  
 C 0.623558 0.835846 -2.160072  
 H -0.341016 -1.088038 -2.468508  
 H -1.240976 0.273889 -3.153813  
 H 1.246809 0.799223 -3.066157  
 H 0.339318 1.887210 -1.998067  
 C 2.363872 -1.299771 -1.322627  
 C 2.133012 -2.582118 -0.773804  
 C 3.187951 -1.167789 -2.458942  
 C 2.733575 -3.690009 -1.401394  
 C 3.772903 -2.278296 -3.061722  
 C 3.539040 -3.550155 -2.529577  
 H 2.561716 -4.686212 -0.984325  
 H 4.407952 -2.151792 -3.941557  
 H 3.987243 -4.432596 -2.992723  
 C 3.019897 1.410030 -0.542531  
 C 2.942410 2.744506 -0.973134  
 C 4.186422 0.964982 0.105012  
 C 4.015845 3.616055 -0.759618  
 H 2.052607 3.120392 -1.481668  
 C 5.254330 1.838224 0.315536  
 H 4.265670 -0.073097 0.437647  
 C 5.171070 3.167068 -0.114918  
 H 3.946981 4.650566 -1.104730  
 H 6.156704 -1.478885 0.816213  
 H 6.007952 3.850066 0.049402  
 C -2.717586 1.506518 -1.020287  
 C -2.771185 2.649179 -0.188138  
 C -3.534786 1.443252 -2.168700  
 C -3.641400 3.693409 -0.556728  
 C -4.387625 2.488575 -2.511166  
 C -4.438385 3.624403 -1.696911  
 H -3.690520 4.582540 0.078006  
 H -5.012408 2.415099 -3.404272  
 H -5.103521 4.454202 -1.948254  
 C -2.737891 -1.403875 -0.767748  
 C -4.071128 -1.300476 -0.335689  
 C -2.219161 -2.671548 -1.089743  
 C -4.873500 -2.441238 -0.246517  
 H -4.489445 -0.327085 -0.070769  
 C -3.027487 -3.807709 -1.004287  
 H -1.180153 -2.786641 -1.407345  
 C -4.356240 -3.695564 -0.582666  
 H -5.909846 -2.346779 0.086935  
 H -2.615748 -4.784984 -1.267916  
 H -4.987015 -4.585190 -0.515356  
 C 1.537631 1.048588 2.346337  
 C 0.469821 0.846566 3.292847  
 C 0.630983 -0.125805 4.465957  
 C -0.673006 -0.841778 4.847170  
 C -1.202543 -1.733188 3.712408  
 H -1.584489 -0.978729 2.425964  
 H 2.451122 0.452447 2.461413  
 H 1.727856 2.055509 1.961716  
 H -0.108393 1.745705 3.559961  
 H -0.620107 0.141567 2.759395  
 H 1.394946 -0.878077 4.204146  
 H 1.028416 0.434436 5.329016  
 H -1.440138 -0.092574 5.118599  
 H -0.505104 -1.452671 5.748602  
 H -0.431313 -2.486903 3.473664  
 H -2.078483 -2.303744 4.068459  
 H -1.776086 -1.695575 1.615873  
 H -2.513502 -0.400534 2.568279  
 H 3.382399 -0.175636 -2.874006  
 H -3.511998 0.550665 -2.798453  
 C 1.347540 -2.832878 0.495895  
 C 2.225889 -2.756588 1.751006  
 H 0.879186 -3.828290 0.440216  
 H 0.500818 -2.128146 0.565795  
 H 3.048766 -3.485542 1.690178  
 H 2.676087 -1.758616 1.865162  
 H 1.645644 -2.979437 2.659443  
 C -1.913035 2.857398 1.042442  
 C -0.569192 3.528723 0.728246

H -1.753992 1.903722 1.570939  
 H -2.466939 3.491284 1.752934  
 H 0.006494 3.720674 1.646815  
 H 0.052753 2.905137 0.067157  
 H -0.724418 4.492072 0.217816  
  
<sup>4</sup>TS5-6C-12  
 Geometry with 83 atoms:  
 Total energy: -3124.183390380  
 Cr -0.268118 -0.993565 0.978857  
 P 1.448191 0.159992 -0.414038  
 P -1.705619 0.195934 -0.733419  
 C -0.646744 0.232626 -2.266047  
 C 0.687718 0.915214 -1.953132  
 H -0.484305 -0.817001 -2.561615  
 H -1.167810 0.726481 -3.099777  
 H 1.381895 0.814858 -2.798796  
 H 0.543968 1.991690 -1.779017  
 C 2.664536 -1.066046 -1.045419  
 C 3.756442 -0.760062 -1.897073  
 C 2.404205 -2.407457 -0.698067  
 C 4.534297 -1.832168 -2.369419  
 C 3.192660 -3.451360 -1.177336  
 C 4.264746 -3.156388 -2.023046  
 H 5.373692 -1.618777 -3.036110  
 H 2.971387 -4.482947 -0.894345  
 H 4.893060 -3.959469 -2.416224  
 C 2.344902 1.499403 0.451888  
 C 1.723857 2.746760 0.641381  
 C 3.580671 1.246569 1.070523  
 C 2.343361 1.730438 1.416290  
 H 0.748167 2.961368 0.199429  
 C 4.195196 2.234486 1.844456  
 H 4.069488 0.278183 0.945147  
 C 3.580779 3.478614 2.017388  
 H 1.852436 4.697421 1.551412  
 H 5.160282 2.029029 2.314095  
 H 4.064072 4.249540 2.622307  
 C -2.049270 1.984204 -0.417359  
 C -1.907202 2.581452 0.858027  
 C -2.466220 2.768615 -1.510157  
 C -2.174094 3.956659 0.980333  
 C -2.725000 4.130471 -1.365167  
 C -2.572731 4.728142 -0.110859  
 H -2.063509 4.427008 1.960948  
 H -3.046133 4.720465 -2.226698  
 H -2.769413 5.795237 0.019044  
 C -3.315645 -0.495313 -1.626294  
 C -4.510757 -0.026158 -0.693280  
 C -3.365295 -1.567593 -2.174978  
 C -5.731694 -0.615804 -1.029697  
 H -4.493369 0.810193 0.008809  
 C -4.590471 -2.149418 -2.512116  
 H -2.451283 -1.955351 -2.631169  
 C -5.775113 -1.676528 -1.939797  
 H -6.654329 -0.239558 -0.581045  
 H -4.617793 -2.976124 -3.226209  
 H -6.731768 -2.133750 -2.203669  
 C 1.255515 -0.977273 2.441145  
 C 0.225850 -1.835032 2.975489  
 C 0.467680 -3.341881 3.117414  
 C -0.789861 -4.190933 2.883075  
 C -1.345883 -4.035497 1.459001  
 C -1.827171 -2.614560 1.114359  
 H 2.203773 -1.435257 2.135908  
 H 1.374311 0.029445 2.857375  
 H -0.368273 -1.413881 3.802281  
 H -0.888960 -1.993740 2.120992  
 H 1.249848 -3.648041 2.399686  
 H 0.879592 -3.535834 4.122283  
 H -1.568731 -3.908691 3.615529  
 H -0.555482 -5.250471 3.074724  
 H -0.559422 -4.338779 0.741906  
 H -2.176647 -4.747437 3.107414  
 H -2.069145 -2.552020 0.043855  
 H -2.751681 -2.361258 1.660395  
 H 1.567631 -2.635781 -0.030475  
 H -2.602412 2.309172 -2.491809  
 C 4.131257 0.644624 -2.336145  
 C 5.556579 1.061683 -1.950312  
 H 3.431817 1.382500 -1.924155

H 4.026278 0.701450 -3.434317  
 H 5.695377 1.040371 -0.858776  
 H 6.315742 0.403101 -2.399565  
 H 5.760661 2.087471 -2.295355  
 C -1.525983 1.808281 2.101400  
 C -2.674561 0.968527 2.675644  
 H -1.172424 2.515552 2.867166  
 H -0.649214 1.171540 1.885823  
 H -3.520221 1.612097 2.964823  
 H -3.053768 0.238121 1.943258  
 H -2.350461 0.414777 3.571134

<sup>4</sup>TS5-6C-13

Geometry with 83 atoms:

Total energy: -3124.184780920

Cr 0.115222 -0.651016 1.061047  
 P 1.523201 0.445677 -0.663226  
 P -1.613671 -0.031861 -0.741929  
 C -0.682371 -0.032506 -2.353487  
 C 0.595311 0.803857 -2.259361  
 H -0.444913 -1.090079 -2.545891  
 H -1.327161 0.291018 -3.184175  
 H 1.264950 0.601860 -3.108119  
 H 0.363187 1.877947 -2.281705  
 C 3.027069 -0.452620 -1.236930  
 C 3.220047 -1.841942 -1.044264  
 C 3.993985 0.292897 -1.943466  
 C 4.403671 -2.419786 -1.541185  
 C 5.152915 -0.304919 -2.432216  
 C 5.362088 -1.671091 -2.220705  
 H 4.567825 -3.490363 -1.389440  
 H 5.891022 0.294280 -2.970442  
 H 6.270763 -2.153663 -2.588826  
 C 2.080718 2.092636 -0.065488  
 C 1.158449 3.155140 -0.053049  
 C 3.333922 2.270878 0.545460  
 C 1.491639 4.375586 0.539904  
 H 0.166612 3.039102 -0.494198  
 C 3.663010 3.494914 1.134325  
 H 4.059178 1.455595 0.567080  
 C 2.745214 4.549845 1.133575  
 H 0.763325 5.190243 0.537891  
 H 4.643859 3.621906 1.599094  
 H 3.005844 5.504374 1.597118  
 C -2.283175 1.680906 -0.578217  
 C -2.722167 2.165729 0.677589  
 C -2.363655 2.517294 -1.708518  
 C -3.195410 3.486433 0.755715  
 C -2.832986 3.826415 -1.606190  
 C -3.245840 4.315728 -0.363977  
 H -3.536620 3.865358 1.723162  
 H -2.882596 4.457988 -2.496203  
 H -3.618436 5.338688 -0.270364  
 C -3.065207 -1.097259 -1.090617  
 C -4.383711 -0.642664 -0.931968  
 C -2.840139 -2.428689 -1.489625  
 C -5.457471 -1.504285 -1.178108  
 H -4.578433 0.387111 -0.625603  
 C -3.915652 -3.282255 -1.740841  
 H -1.820694 -2.806018 -1.607664  
 C -5.227370 -2.821522 -1.583990  
 H -6.480158 -1.139076 -1.056301  
 H -3.728683 -4.311623 -2.056223  
 H -6.069152 -3.490500 -1.778281  
 C 1.808081 -0.231497 2.264542  
 C 0.955462 -1.054843 3.086924  
 C 1.367771 -2.483112 3.458040  
 C 0.176350 -3.440114 3.606650  
 C -0.621800 -3.596916 2.303031  
 C -1.270404 -2.297504 1.794675  
 H 2.755694 -0.657495 1.913034  
 H 1.870120 0.838450 2.487793  
 H 0.441822 -0.530656 3.907861  
 H -0.226204 -1.438224 2.466944  
 H 2.053649 -2.872356 2.685788  
 H 1.947547 -2.445074 4.395879  
 H -0.494123 -3.072596 4.405675  
 H 0.539660 -4.426129 3.938540  
 H 0.054127 -3.997609 1.524856  
 H -1.404634 -4.364000 2.441365  
 H -1.724612 -2.464632 0.811241

H -2.082890 -1.975762 2.469031  
 H 3.842868 1.362861 -2.104089  
 H -2.064437 2.150118 -2.690698  
 C 2.204709 -2.773713 -0.415753  
 C 1.290729 -3.448672 -1.445114  
 H 1.586060 -2.238404 0.324575  
 H 2.735130 -3.547848 0.160957  
 H 1.874656 -4.054192 -2.155245  
 H 0.562009 -4.112230 -0.952456  
 H 0.735574 -2.702433 -2.034523  
 C -2.676470 1.346442 1.950499  
 C -1.452975 1.680970 2.813537  
 H -2.694518 0.269854 1.721303  
 H -3.592047 1.541986 2.531714  
 H -1.417974 1.054712 3.718150  
 H -0.511901 1.540706 2.254751  
 H -1.469580 2.735407 3.130454

<sup>4</sup>TS5-6C-14

Geometry with 83 atoms:

Total energy: -3124.183625200

Cr 0.025035 -0.229479 1.230889  
 P 1.633608 0.323923 -0.633163  
 P -1.582911 0.128337 -0.744527  
 C -0.557787 0.125829 -2.302639  
 C 0.666883 1.013631 -2.072853  
 H -0.246849 -0.907298 -2.522509  
 H -1.163895 0.479856 -3.149999  
 H 1.309121 1.059490 -2.965070  
 H 0.355441 2.042595 -1.834484  
 C 2.542195 -1.061667 -1.457365  
 C 2.274452 -2.428690 -1.217803  
 C 3.491236 -0.700671 -2.437195  
 C 2.972692 -3.385812 -1.978928  
 C 4.173456 -1.665497 -3.173309  
 C 3.908144 -3.019472 -2.943464  
 H 2.771031 -4.445908 -1.800767  
 H 4.906229 -1.362199 -3.924576  
 H 4.430604 -3.789261 -3.516723  
 C 2.922028 1.570143 -0.251670  
 C 2.646353 2.945822 -0.334526  
 C 4.160565 1.151530 0.266508  
 C 3.597146 3.882410 0.082750  
 H 1.691146 3.305469 -0.722329  
 C 5.106212 2.090879 0.682341  
 H 4.394269 0.086689 0.338568  
 C 4.827592 3.458050 0.591967  
 H 3.373111 4.949255 0.006294  
 H 6.066501 1.751554 1.078314  
 H 5.568940 4.192077 0.917599  
 C -2.489855 1.731849 -0.931172  
 C -2.233635 2.881217 -0.147966  
 C -3.429733 1.801276 -1.981260  
 C -2.942118 4.059747 -0.451651  
 C -4.121557 2.977370 -2.258020  
 C -3.873389 4.116430 -1.485872  
 H -2.749687 4.954597 0.146906  
 H -4.847360 3.005124 -3.074117  
 H -4.403387 5.049521 -1.692488  
 C -2.860157 -1.165527 -0.967154  
 C -4.121079 -1.008764 -0.364190  
 C -2.550754 -2.383539 -1.597780  
 C -5.058491 -2.042750 -0.409057  
 H -4.377733 -0.071907 0.135872  
 C -3.493639 -3.414917 -1.640935  
 H -1.574469 -2.543365 -2.060774  
 C -4.748320 -3.247616 -1.048037  
 H -6.037101 -1.905025 0.057310  
 H -3.244665 -4.352838 -2.143444  
 H -5.483801 -4.054907 -1.083607  
 C 1.593775 0.409760 2.486134  
 C 0.526179 0.039730 3.381160  
 C 0.648417 -1.166038 4.317737  
 C -0.697837 -1.857211 4.579961  
 C -1.299711 -2.466647 3.303801  
 C -1.613564 -1.456891 2.183760  
 H 2.490446 -0.220748 2.452003  
 H 1.810662 1.472881 2.335604  
 H -0.014830 0.879119 3.844120  
 H -0.588303 -0.485616 2.729306  
 H 1.355364 -1.893424 3.882754

H 1.096760 -0.824634 5.266016  
 H -1.406843 -1.127533 5.013860  
 H -0.565430 -2.646911 5.336890  
 H -0.595879 -3.224661 2.917428  
 H -2.221606 -3.018892 3.558241  
 H -1.824389 -1.996414 1.250288  
 H -2.514301 -0.866259 2.422217  
 H 3.706721 0.354788 -2.620118  
 H -3.628539 0.914638 -2.588039  
 C 1.341243 -2.942573 -0.142138  
 C 2.084821 -3.279895 1.156724  
 H 0.825649 -3.844065 -0.510237  
 H 0.532797 -2.214187 0.054070  
 H 2.592744 -2.394926 1.570364  
 H 1.397568 -3.675339 1.919644  
 H 2.856085 -4.037314 0.971984  
 C -1.297204 2.921913 1.041997  
 C -2.011918 2.589167 2.358578  
 H -0.859275 3.930188 1.114472  
 H -0.438282 2.245044 0.894597  
 H -2.855456 3.276810 2.525710  
 H -2.418442 1.565371 2.345788  
 H -1.327806 2.680346 3.216482

<sup>4</sup>TS5-6C-15

Geometry with 83 atoms:

Total energy: -3124.183338790

Cr 0.128376 -1.124934 0.805649  
 P -1.547205 -0.214524 -0.806416  
 P 1.495262 0.306984 -0.724600  
 C 0.663941 0.480937 -2.408778  
 C -0.685299 -0.248515 -2.457965  
 H 0.519725 1.555640 -2.585500  
 H 1.345346 0.107839 -3.186994  
 H -1.335392 0.150000 -3.250639  
 H -0.553647 -1.318421 -2.682810  
 C -1.956815 1.561342 -0.510349  
 C -2.076683 2.089176 0.799325  
 C -2.140778 2.412142 -1.617267  
 C -2.362072 3.457326 0.941253  
 C -2.420872 3.767647 -1.450945  
 C -2.527502 4.293863 -0.161656  
 H -2.450050 3.873512 1.948374  
 H -2.554493 4.408005 -2.325839  
 H -2.739881 5.355592 -0.014510  
 C -3.148820 -1.033026 -1.168744  
 C -3.134668 -2.361538 -1.631172  
 C -3.380701 -0.384465 -0.986016  
 C -4.330545 -3.025478 -1.909907  
 H -2.187208 -2.887031 -1.776752  
 C -5.576651 -1.057260 -1.256562  
 H -4.411670 0.649313 -0.637222  
 C -5.554968 -2.375547 -1.718643  
 H -4.306993 -4.055938 -2.272673  
 H -6.529554 -0.543191 -1.108716  
 H -6.490949 -2.897948 -1.930893  
 C 3.173052 -0.383792 -1.062339  
 C 3.303163 -1.716059 -1.526267  
 C 4.326528 0.383581 -0.817956  
 C 5.593024 -2.210227 -1.777167  
 C 5.598760 -0.138362 -1.056161  
 C 5.732249 -1.437610 -1.549875  
 H 4.702333 -3.230394 -2.155387  
 H 6.481858 0.474207 -0.859941  
 H 6.722502 -1.852513 -1.753043  
 C 1.742296 2.040095 -0.176327  
 C 1.381433 2.415675 1.127609  
 C 2.245476 3.017317 -1.055058  
 C 1.522435 3.741643 -1.547039  
 H 0.978531 1.677827 1.823538  
 C 3.282997 4.340989 -0.634345  
 H 2.538770 2.745466 -2.072117  
 C 2.021333 4.705398 0.667700  
 H 1.233961 4.020811 2.563188  
 H 2.774873 5.091116 -1.325552  
 H 2.128225 5.742579 0.994588  
 C -1.371623 -2.519410 1.316975  
 C -0.313692 -2.742927 2.268837  
 C -0.461888 -2.282374 3.722907  
 C 0.868295 -1.879807 4.376778  
 C 1.565590 -0.710214 3.662661

|   |           |           |           |
|---|-----------|-----------|-----------|
| C | 1.953975  | -1.014045 | 2.206412  |
| H | -2.302746 | -2.054036 | 1.658529  |
| H | -1.520836 | -3.261195 | 0.524643  |
| H | 0.230807  | -3.695805 | 2.170607  |
| H | 0.839650  | -2.000224 | 2.005816  |
| H | -1.159360 | -1.426492 | 3.760664  |
| H | -0.940117 | -3.091658 | 4.300799  |
| H | 1.548063  | -2.751718 | 4.389539  |
| H | 0.688257  | -1.614665 | 5.431125  |
| H | 0.901135  | 0.174386  | 3.695979  |
| H | 2.468446  | -0.422937 | 4.231079  |
| H | 2.460403  | -0.153925 | 1.751199  |
| H | 2.680397  | -1.844814 | 2.163854  |
| H | -2.071023 | 2.018502  | -2.632504 |
| H | 4.237494  | 1.401991  | -0.438265 |
| C | -1.969465 | 1.255132  | 2.058049  |
| C | -3.289360 | 0.591622  | 2.468329  |
| H | -1.608061 | 1.893675  | 2.879324  |
| H | -1.200993 | 0.471376  | 1.932513  |
| H | -3.657954 | -0.091466 | 1.688588  |
| H | -3.167199 | 0.013422  | 3.397534  |
| H | -4.069104 | 1.349903  | 2.641515  |
| C | 2.127342  | -2.655120 | -1.723868 |
| C | 2.129331  | -3.840947 | -0.748721 |
| H | 2.131535  | -3.033561 | -2.760396 |
| H | 1.174853  | -2.114965 | -1.612953 |
| H | 1.236843  | -4.470909 | -0.893401 |
| H | 3.015285  | -4.477914 | -0.891114 |
| H | 2.143156  | -3.494900 | 0.297166  |

<sup>4</sup>TSS-6C-16

Geometry with 83 atoms:

Total energy: -3124.182748100

|    |           |           |           |
|----|-----------|-----------|-----------|
| Cr | 0.351859  | -0.797433 | 0.892988  |
| P  | 1.501863  | 0.850694  | -0.523082 |
| P  | -1.516760 | -0.066153 | -0.700259 |
| C  | -0.744926 | 0.877782  | -2.138091 |
| C  | 0.769242  | 0.660881  | -2.230104 |
| H  | -1.246532 | 0.587158  | -3.072717 |
| H  | -0.960111 | 1.942121  | -1.965683 |
| H  | 1.007784  | -0.351461 | -2.588218 |
| H  | 1.230558  | 1.369892  | -2.935259 |
| C  | 3.324939  | 0.677385  | -0.678336 |
| C  | 3.894208  | -0.583189 | -1.004727 |
| C  | 4.161323  | 1.764124  | -0.369302 |
| C  | 5.293195  | -0.685111 | -1.032144 |
| C  | 5.550779  | 1.633932  | -0.404280 |
| C  | 6.116971  | 0.405467  | -0.743052 |
| H  | 5.757451  | -1.640721 | -1.280248 |
| H  | 6.183294  | 2.490829  | -0.161040 |
| H  | 7.202826  | 0.287306  | -0.774218 |
| C  | 1.111057  | 2.605863  | -0.162822 |
| C  | 1.451318  | 3.629588  | -1.067461 |
| C  | 0.352522  | 2.925117  | 0.974459  |
| C  | 1.047027  | 4.943857  | -0.829137 |
| H  | 2.034910  | 3.403392  | -1.963023 |
| C  | -0.057588 | 4.241368  | 1.207429  |
| H  | 0.065659  | 2.142845  | 1.678647  |
| C  | 0.290186  | 5.251507  | 0.307956  |
| H  | 1.319597  | 5.731363  | -1.535890 |
| H  | -0.656469 | 4.473430  | 2.091130  |
| H  | -0.030949 | 6.280324  | 0.487998  |
| C  | -2.802391 | 1.092898  | -0.064768 |
| C  | -3.041250 | 1.308714  | 1.313203  |
| C  | -3.552325 | 1.806233  | -1.021773 |
| C  | -4.008287 | 2.264306  | 1.674948  |
| C  | -4.510996 | 2.741298  | -0.638298 |
| C  | -4.732408 | 2.977877  | 0.721329  |
| H  | -4.196589 | 2.444188  | 2.737031  |
| H  | -5.079923 | 3.282861  | -1.397585 |
| H  | -5.474230 | 3.714554  | 1.039194  |
| C  | -2.451787 | -1.420003 | -1.511351 |
| C  | -3.751996 | -1.762934 | -1.108760 |
| C  | -1.806098 | -2.198615 | -2.489359 |
| C  | -4.397719 | -2.862376 | -1.683367 |
| H  | -4.269534 | -1.166904 | -0.354265 |
| C  | -2.457486 | -3.292069 | -3.063969 |
| H  | -0.787849 | -1.954469 | -2.807478 |
| C  | -3.754561 | -3.627437 | -2.660161 |
| H  | -5.412498 | -3.117189 | -1.367922 |
| H  | -1.950243 | -3.885466 | -3.828693 |

|   |           |           |           |
|---|-----------|-----------|-----------|
| H | -4.263134 | -4.484254 | -3.108502 |
| C | 1.766766  | -0.249461 | 2.352073  |
| C | 1.085612  | -1.400278 | 2.894743  |
| C | 1.827696  | -2.731319 | 3.060286  |
| C | 0.950827  | -3.965095 | 2.803603  |
| C | 0.425103  | -4.015865 | 1.360458  |
| C | -0.514476 | -2.855076 | 0.987137  |
| H | 2.809454  | -0.367824 | 2.033539  |
| H | 1.556109  | 0.738453  | 2.778049  |
| H | 0.378619  | -1.196785 | 3.714572  |
| H | 0.103429  | -1.953062 | 2.028056  |
| H | 2.685921  | -2.748641 | 2.365195  |
| H | 2.253413  | -2.767870 | 4.077350  |
| H | 0.098639  | -3.969042 | 3.508819  |
| H | 1.532385  | -4.876193 | 3.017892  |
| H | 1.292631  | -4.021734 | 0.675671  |
| H | -0.097114 | -4.974015 | 1.190123  |
| H | -0.707607 | -2.859896 | -0.095801 |
| H | -1.492602 | -2.959663 | 1.482773  |
| H | 3.729302  | 2.724647  | -0.086103 |
| H | -3.390497 | 1.626700  | -2.087281 |
| C | 3.036272  | -1.796489 | -1.323609 |
| C | 3.637307  | -3.161836 | -0.990364 |
| H | 2.766971  | -1.717376 | -2.395164 |
| H | 2.073781  | -1.700364 | -0.787090 |
| H | 2.897109  | -3.957149 | -1.168099 |
| H | 4.512651  | -3.393400 | -1.615689 |
| H | 3.952229  | -3.216624 | 0.063843  |
| C | -2.386894 | 0.511192  | 2.421273  |
| C | -3.123789 | -0.801538 | 2.712092  |
| H | -2.351101 | 1.124678  | 3.335323  |
| H | -1.332726 | 0.290554  | 2.175879  |
| H | -2.623233 | -1.370482 | 3.511595  |
| H | -4.158884 | -0.604151 | 3.031901  |
| H | -3.168295 | -1.438096 | 1.815264  |

<sup>4</sup>TSS-6C-17

Geometry with 83 atoms:

Total energy: -3124.183399900

|    |           |           |           |
|----|-----------|-----------|-----------|
| Cr | -0.052295 | 0.106697  | 1.187984  |
| P  | 1.608486  | 0.260072  | -0.669764 |
| P  | -1.559072 | -0.054097 | -0.790138 |
| C  | -0.667005 | 0.498358  | -2.334441 |
| C  | 0.773345  | -0.023581 | -2.319749 |
| H  | -1.206100 | 0.149506  | -3.227115 |
| H  | -0.709720 | 1.596000  | -2.354420 |
| H  | 0.784118  | -1.116504 | -2.461521 |
| H  | 1.377419  | 0.410295  | -3.132102 |
| C  | 3.046956  | -0.891891 | -0.700970 |
| C  | 3.059387  | -2.117736 | 0.005704  |
| C  | 4.166461  | -0.523604 | -1.476277 |
| C  | 4.224855  | -2.904889 | -0.057515 |
| C  | 5.298695  | -1.331337 | -1.539593 |
| C  | 5.331744  | -2.525338 | -0.812598 |
| H  | 4.254534  | -3.844335 | 0.501358  |
| H  | 6.154629  | -1.025013 | -2.145500 |
| H  | 6.219941  | -3.161566 | -0.836494 |
| C  | 2.360061  | 1.936270  | -0.787236 |
| C  | 1.846010  | 2.921096  | -1.647119 |
| C  | 3.434118  | 2.271666  | 0.059836  |
| C  | 2.381585  | 4.213610  | -1.648904 |
| H  | 1.026453  | 2.698706  | -2.330502 |
| C  | 3.968615  | 3.560805  | 0.052128  |
| H  | 3.870456  | 1.515998  | 0.715436  |
| C  | 3.439665  | 4.538775  | -0.797444 |
| H  | 1.969949  | 4.965812  | -2.326339 |
| H  | 4.806533  | 3.801054  | 0.711095  |
| H  | 3.857525  | 5.548302  | -0.800674 |
| C  | -3.031663 | 1.047297  | -0.661848 |
| C  | -2.853272 | 2.409681  | -0.311866 |
| C  | -4.329966 | 0.541490  | -0.855497 |
| C  | -3.992622 | 3.225881  | -0.226245 |
| C  | -5.447051 | 1.369994  | -0.743659 |
| C  | -5.275949 | 2.722171  | -0.439952 |
| H  | -3.866707 | 4.282911  | 0.023656  |
| H  | -6.446878 | 0.957354  | -0.897530 |
| H  | -6.141573 | 3.384582  | -0.362497 |
| C  | -2.162588 | -1.729317 | -1.241972 |
| C  | -1.964365 | -2.803235 | -0.359531 |
| C  | -2.792438 | -1.971674 | -2.478336 |
| C  | -2.388165 | -4.091322 | -0.700464 |

|   |           |           |           |
|---|-----------|-----------|-----------|
| H | -1.472064 | -2.641055 | 0.599586  |
| C | -3.213774 | -3.258321 | -2.817023 |
| H | -2.968258 | -1.153368 | -3.180442 |
| C | -3.012803 | -4.320831 | -1.928127 |
| H | -2.223694 | -4.917154 | -0.004456 |
| H | -3.702492 | -3.432674 | -3.778681 |
| H | -3.342555 | -5.327695 | -2.195582 |
| C | 1.636153  | 0.638558  | 2.355647  |
| C | 0.562070  | 0.446912  | 3.297551  |
| C | 0.526580  | -0.781292 | 4.213268  |
| C | -0.898255 | -1.197001 | 4.606709  |
| C | -1.769034 | -1.589399 | 3.401646  |
| C | -1.967802 | -0.462780 | 2.373354  |
| H | 2.444194  | -0.102524 | 2.324513  |
| H | 1.965315  | 1.664544  | 2.165153  |
| H | 0.198443  | 1.361430  | 3.793617  |
| H | -0.661601 | 0.202903  | 2.714304  |
| H | 1.028828  | -1.624303 | 3.705614  |
| H | 1.124416  | -0.565179 | 5.115063  |
| H | -1.383434 | -0.363961 | 5.147986  |
| H | -0.850638 | -2.038875 | 5.316120  |
| H | -1.312595 | -2.469147 | 2.908935  |
| H | -2.754929 | -1.933100 | 3.763095  |
| H | -2.598377 | -0.806626 | 2.154924  |
| H | -2.508904 | 0.386106  | 2.827321  |
| H | 4.158436  | 0.418321  | -2.028508 |
| H | -4.477463 | -0.512589 | -1.093331 |
| C | 1.889110  | -2.679012 | 0.789137  |
| C | 1.265702  | -3.917611 | 0.135435  |
| H | 1.106129  | -1.911494 | 0.919614  |
| H | 2.228473  | -2.934228 | 1.807083  |
| H | 2.010044  | -4.719844 | 0.015089  |
| H | 0.444175  | -4.314549 | 0.751255  |
| H | 0.860733  | -3.685546 | -0.861545 |
| C | -1.505506 | 3.028168  | 0.015867  |
| C | -1.385368 | 3.503710  | 1.469953  |
| H | -1.318491 | 3.879419  | -0.660627 |
| H | -0.687074 | 2.318532  | -0.183364 |
| H | -1.593254 | 2.684644  | 2.176788  |
| H | -0.372031 | 3.887181  | 1.669834  |
| H | -2.098970 | 4.311725  | 1.691483  |

<sup>4</sup>TSS-6C-18

Geometry with 83 atoms:

Total energy: -3124.183003000

|    |           |           |           |
|----|-----------|-----------|-----------|
| Cr | 0.321167  | -0.860722 | 0.947781  |
| P  | 1.554259  | 0.734247  | -0.462355 |
| P  | -1.495663 | -0.053705 | -0.676448 |
| C  | -0.645707 | 0.782359  | -2.139643 |
| C  | 0.857227  | 0.485255  | -2.175674 |
| H  | -1.136817 | 0.460554  | -3.069486 |
| H  | -0.809953 | 1.863920  | -2.033613 |
| H  | 1.046742  | -0.560074 | -2.460501 |
| H  | 1.373521  | 1.121653  | -2.911097 |
| C  | 3.377575  | 0.522018  | -0.562335 |
| C  | 3.931502  | -0.762453 | -0.790181 |
| C  | 4.230326  | 1.610183  | -0.298091 |
| C  | 5.328773  | -0.897876 | -0.770185 |
| C  | 5.616092  | 1.448667  | -0.284043 |
| C  | 6.168406  | 0.188786  | -0.524898 |
| H  | 5.764496  | -1.886315 | -0.941404 |
| H  | 6.260088  | 2.306619  | -0.077299 |
| H  | 7.251943  | 0.048480  | -0.510884 |
| C  | 1.200692  | 2.510134  | -0.176275 |
| C  | 1.540334  | 3.485843  | -1.132696 |
| C  | 0.479225  | 2.894105  | 0.964656  |
| C  | 1.167487  | 4.817220  | -0.942892 |
| H  | 2.098583  | 3.208455  | -2.030214 |
| C  | 0.101831  | 4.227509  | 1.149901  |
| H  | 0.196241  | 2.148593  | 1.709306  |
| C  | 0.445486  | 5.189500  | 0.197658  |
| H  | 1.438026  | 5.567606  | -1.689680 |
| H  | -0.469437 | 4.510130  | 2.037105  |
| H  | 0.148815  | 6.231523  | 3.339865  |
| C  | -2.665131 | 1.222430  | -0.035412 |
| C  | -2.941029 | 1.391881  | 1.343335  |
| C  | -3.294157 | 2.061914  | -0.976440 |
| C  | -3.819071 | 2.423717  | 1.720849  |
| C  | -4.164439 | 3.074272  | -0.577582 |
| C  | -4.421162 | 3.261144  | 0.782937  |
| H  | -4.033098 | 2.566492  | 2.783625  |



H -4.637686 3.713399 -1.326592  
H -5.094260 4.055912 1.113629  
C -2.562764 -1.322229 -1.464536  
C -3.927140 -1.447655 -1.160622  
C -1.968015 -2.242712 -2.347496  
C -4.683117 -2.474321 -1.735950  
H -4.407396 -0.737870 -0.484563  
C -2.727980 -3.262024 -2.924022  
H -0.903631 -2.166777 -2.590455  
C -4.088017 -3.381252 -2.616783  
H -5.746025 -2.559520 -1.496839  
H -2.256871 -3.967170 -3.613146  
H -4.682493 -4.180452 -3.065806  
C 1.711518 -0.352579 2.444568  
C 1.008299 -1.504180 2.955801  
C 1.732434 -2.847328 3.104698  
C 0.847497 -4.066394 2.808047  
C 0.337405 -4.080030 1.358653  
C -0.587724 -2.901951 1.006252  
H 2.759256 -0.475426 2.145235  
H 1.500190 0.630980 2.880468  
H 0.291323 -1.308303 3.768694  
H 0.027076 -2.024786 2.065259  
H 2.602607 -2.859420 2.424615  
H 2.140242 -2.910534 4.127836  
H -0.013836 -4.078164 3.501911  
H 1.417518 -4.987744 3.009124  
H 1.210946 -4.079084 0.680323  
H -0.192293 -5.029005 1.161741  
H -0.783861 -2.883188 -0.075571  
H -1.567226 -3.004456 1.499956  
H 3.812502 2.596177 -0.091217  
H -3.109509 1.922970 -2.043808  
C 3.100059 -1.999779 -1.064348  
C 3.141345 -2.461908 -2.526432  
H 2.050822 -1.830726 -0.763574  
H 3.460022 -2.818809 -0.419589  
H 2.498630 -3.344086 -2.678092  
H 2.809104 -1.668632 -3.214475  
H 4.165963 -2.737872 -2.820639  
C -2.410922 0.484488 2.433324  
C -3.241090 -0.793017 2.608055  
H -2.389831 1.040974 3.383448  
H -1.359252 0.211700 2.235092  
H -4.281978 -0.547160 2.870834  
H -3.263599 -1.388077 1.682573  
H -2.828847 -1.425725 3.410013

<sup>4</sup>TSS-6C-19

Geometry with 83 atoms:

Total energy: -3124.183944160

Cr 0.040736 -1.076689 0.930690  
P -1.566032 -0.190383 -0.735413  
P 1.489691 0.219880 -0.662249  
C 0.658225 0.342046 -2.348146  
C -0.693720 -0.378278 -2.370238  
H 0.510504 1.411002 -2.552894  
H 1.335481 -0.049664 -3.120468  
H -1.326899 -0.025899 -3.198480  
H -0.570665 -1.462631 -2.511614  
C -1.867972 1.619459 -0.565083  
C -1.827053 2.262460 0.695647  
C -2.117367 2.377572 -1.724458  
C -2.016134 3.654032 0.737698  
C -2.304723 3.757069 -1.658345  
C -2.246789 4.398899 -0.418285  
H -1.977097 4.161565 1.705217  
H -2.493946 4.327145 -2.570851  
H -2.383284 5.480948 -0.351030  
C -3.210094 -0.939549 -1.042942  
C -4.403851 -0.242412 -0.797490  
C -3.273033 -2.267301 -1.504170  
C -5.638169 -0.866212 -1.006670  
H -4.375284 0.791857 -0.449188  
C -4.507291 -2.881986 -1.721702  
H -2.355325 -2.830333 -1.696860  
C -5.693266 -2.183492 -1.468972  
H -6.561002 -0.314652 -0.810734  
H -4.543665 -3.911824 -2.085223  
H -6.659109 -2.667277 -1.633477  
C 3.109591 -0.616537 -0.952355

C 3.142614 -2.006929 -1.225111  
C 4.315757 0.095936 -0.826418  
C 4.392656 -2.625538 -1.384329  
C 5.546160 -0.542195 -0.990406  
C 5.584850 -1.908997 -1.273702  
H 4.426479 -3.698754 -1.593251  
H 6.471562 0.029863 -0.890486  
H 6.542498 -2.419878 -1.399949  
C 1.875647 1.961902 -0.230735  
C 1.668856 2.410684 1.083678  
C 2.343348 2.872971 -1.196242  
C 1.923888 3.741108 1.427825  
H 1.296617 1.726535 1.846896  
C 2.593802 4.202304 -0.850767  
H 2.520790 2.547716 -2.224337  
C 2.384096 4.639018 0.461894  
H 1.755884 4.075971 2.454254  
H 2.956068 4.899938 -1.609750  
H 2.579420 5.680315 0.729548  
C -1.524332 -2.399143 1.440139  
C -0.471533 -2.682959 2.381711  
C -0.588172 -2.224225 3.838966  
C 0.767394 -1.918513 4.492025  
C 1.530588 -0.797674 3.795981  
C 1.874870 -1.065579 2.324645  
H -2.425494 -1.885022 1.793414  
H -1.727012 -3.128041 0.648444  
H 0.023201 -3.661784 2.273742  
H 0.710437 -1.994557 2.122876  
H -1.224792 -1.322154 3.880716  
H -1.121028 -3.002342 4.411904  
H 1.391523 -2.831258 4.483148  
H 0.610918 -1.663344 5.552593  
H 0.925809 0.145096 3.864999  
H 2.459262 -0.568132 4.356239  
H 2.411747 -0.219110 1.879289  
H 2.560339 -1.927992 2.246663  
H -2.170781 1.886042 -2.697849  
H 4.300388 1.161204 -0.593120  
C -1.661504 1.523524 2.006290  
C -2.979420 0.970938 2.560616  
H -1.201722 2.198353 2.744571  
H -0.942846 0.688212 1.885921  
H -2.819971 0.458324 3.522384  
H -3.702105 1.785101 2.726800  
H -3.440479 0.254577 1.863923  
C 1.898866 -2.859830 -1.373895  
C 1.561851 -3.215152 -2.826942  
H 1.034024 -2.353451 -0.903786  
H 2.035274 -3.790789 -0.798651  
H 0.641194 -3.818220 -2.883355  
H 1.424006 -2.315355 -3.445547  
H 2.374715 -3.801778 -3.282546

<sup>4</sup>TSS-6C-20

Geometry with 83 atoms:

Total energy: -3124.185054160

Cr 0.041546 -0.067768 1.223061  
P 1.610620 0.275503 -0.691936  
P -1.659026 0.033081 -0.708761  
C -0.749896 0.629368 -2.224891  
C 0.689949 0.115177 -2.311327  
H -1.330076 0.377662 -3.126594  
H -0.776799 1.725726 -2.142932  
H 0.713338 -0.960186 -2.543375  
H 1.250364 0.621790 -3.112881  
C 2.998570 -0.922463 -0.899481  
C 3.000193 -2.198457 -0.285050  
C 4.055641 -0.559639 -1.757630  
C 4.079537 -3.059438 -0.553120  
C 5.110912 -1.433735 -2.010970  
C 5.123235 -2.690919 -1.400800  
H 4.094635 -4.045265 -0.080168  
H 5.921198 -1.131679 -2.678582  
H 5.947217 -3.384950 -1.584013  
C 2.409964 1.929407 -0.743364  
C 1.879859 2.988502 -1.499220  
C 3.538907 2.169749 0.062546  
C 2.462122 4.259462 -1.445816  
H 1.011769 2.841706 -2.142997  
C 4.119983 3.437641 0.108859

H 3.977987 1.358606 0.646378  
C 3.580842 4.488300 -0.641643  
H 2.039230 5.071053 -2.022967  
H 5.001138 3.604831 0.733045  
H 4.035993 5.480838 -0.603327  
C -3.044293 1.253109 -0.609981  
C -2.814674 2.539379 -0.065643  
C -4.307517 0.938959 -1.146121  
C -3.873909 3.462646 -0.068887  
C -5.344997 1.870743 -1.130566  
C -5.127328 3.139310 -0.586972  
H -3.703770 4.460607 0.344850  
H -6.318289 1.606801 -1.550912  
H -5.931105 3.879585 -0.573801  
C -2.444113 -1.559590 -1.168270  
C -3.387039 -2.121814 -0.285199  
C -2.086003 -2.276147 -2.322206  
C -3.955152 -3.368118 -0.552992  
H -3.695991 -1.575245 0.608141  
C -2.651264 -3.528662 -2.582427  
H -1.364449 -1.872255 -3.033519  
C -3.583914 -4.078447 -1.699710  
H -4.691659 -3.785429 0.137927  
H -2.362046 -4.073197 -3.484523  
H -4.025968 -5.055989 -1.906632  
C 1.537693 0.900258 3.284812  
C 0.597337 0.411833 3.326165  
C 0.992117 -0.711167 4.291302  
C -0.173012 -1.644868 4.648918  
C -0.716864 -2.392825 3.421809  
C -1.308844 -1.486204 2.327074  
H 2.530159 0.435279 2.315572  
H 1.550595 1.969902 2.111460  
H -0.048648 1.171983 3.791026  
H -0.467399 -0.318845 2.766538  
H 1.806285 -1.304219 3.838279  
H 1.411430 -0.253847 5.203444  
H -0.985100 -1.059078 5.118156  
H 0.160110 -2.372590 5.406176  
H 0.103438 -2.993760 2.989573  
H -1.484217 -3.119495 3.742324  
H -1.475560 -2.070762 1.412228  
H -2.281792 -1.068670 2.636049  
H 4.058957 0.425600 -2.228900  
H -4.486225 -0.042605 -1.587110  
C 1.878576 -2.718848 0.588634  
C 0.743799 -3.374995 -2.058666  
H 1.475928 -1.900295 1.213408  
H 2.290854 -3.446601 1.304930  
H 1.123491 -4.210747 -0.813733  
H -0.037253 -3.768964 0.462782  
H 0.263713 -2.661327 -0.890931  
C -1.496081 2.973595 0.542618  
C -1.558111 3.092263 2.070787  
H -1.203797 3.946790 0.114212  
H -0.686128 2.280358 0.259118  
H -2.294599 3.850800 2.376999  
H -1.864108 2.139547 2.531654  
H -0.581217 3.384092 2.486759

<sup>4</sup>TSS-6C-21

Geometry with 83 atoms:

Total energy: -3124.183555750

Cr -0.011955 -0.025501 1.244013  
P -1.622730 -0.283306 -0.671219  
P 1.592977 -0.020937 -0.753494  
C 0.574887 0.065352 -2.313400  
C -0.639187 -0.851702 -2.154042  
H 0.249775 1.105985 -2.468711  
H 1.193184 -0.222474 -3.176959  
H -1.272843 -0.846153 -3.053086  
H -0.322717 -1.892918 -1.983616  
C -2.455235 1.219587 -1.358175  
C -2.267093 2.526456 -0.853017  
C -3.270518 1.023575 -2.492480  
C -2.900837 3.592910 -1.518718  
C -3.891530 2.093516 -3.131234  
C -3.699813 3.389389 -2.641674  
H -2.760051 4.607587 -1.136180  
H -4.519781 1.916764 -4.007300  
H -4.175081 4.240829 -3.134923

C -2.963144 -1.519320 -0.479365  
C -4.262671 -1.122688 -0.121212  
C -2.665639 -2.891068 -0.564325  
C -5.247587 -2.081187 0.132734  
H -4.515121 -0.062330 -0.048574  
C -3.655222 -3.845231 -0.314790  
H -1.659326 -3.229604 -0.822062  
C -4.948169 -3.442990 0.034698  
H -6.255674 -1.759571 0.405737  
H -3.413657 -4.908125 -0.393075  
H -5.720928 -4.190211 0.230286  
C 2.623111 -1.523252 -1.078304  
C 2.422894 -2.765239 -0.434104  
C 3.607816 -1.412309 -2.083704  
C 3.234461 -3.850224 -0.818605  
C 4.399759 -2.498821 -2.443608  
C 4.211141 -3.728151 -1.803360  
H 3.087126 -4.815274 -0.325644  
H 5.158283 -2.387864 -3.222066  
H 4.822084 -4.592087 -2.076409  
C 2.767917 1.382075 -0.826421  
C 2.384520 2.618127 -1.374720  
C 4.017572 1.274602 -0.189249  
C 3.242885 3.719374 -1.301202  
H 1.416231 2.736809 -1.865710  
C 4.870499 2.377556 -0.118220  
H 4.331754 0.323918 0.247913  
C 4.486321 3.602340 -0.674052  
H 2.936978 4.672023 -1.740495  
H 5.841264 2.278524 0.373583  
H 5.156177 4.463803 -0.619064  
C -1.519313 -0.971310 2.375626  
C -0.500294 -0.626262 3.334014  
C -0.742286 0.451480 4.394334  
C 0.529871 1.228042 4.764363  
C 1.104302 2.015210 3.575819  
C 1.542431 1.153396 2.377271  
H -2.474388 -0.432588 2.407946  
H -1.628282 -2.017925 2.070036  
H 0.106089 -1.463557 3.711303  
H 0.590762 0.048381 2.768320  
H -1.506903 1.155929 4.025828  
H -1.169848 -0.031581 5.289271  
H 1.292203 0.523911 5.147100  
H 0.308147 1.921490 5.591479  
H 0.342273 2.739850 3.237525  
H 1.962132 2.622117 3.915773  
H 1.764359 1.800656 1.518391  
H 2.467358 0.596401 2.604820  
H -3.429755 0.013412 -2.877584  
H 3.761168 -0.455810 -2.589189  
C -1.494870 2.845833 0.408854  
C -2.382857 2.795187 1.658691  
H -1.051045 3.849615 0.315991  
H -0.633427 2.162594 0.516522  
H -1.818811 3.073831 2.561484  
H -3.227212 3.494798 1.559332  
H -2.802687 1.788949 1.810355  
C 1.424848 -3.009486 0.679112  
C 2.067752 -2.977762 2.070834  
H 0.953092 -3.993463 0.522777  
H 0.597238 -2.281630 0.628666  
H 2.887345 -3.709899 2.137682  
H 2.493036 -1.986402 2.294635  
H 1.332387 -3.225082 2.852062

C 5.346880 -1.220272 -0.820960  
C 5.673512 1.128241 -0.370591  
C 6.203980 -0.147109 -0.576396  
H 5.764376 -2.220566 -0.967058  
H 6.331067 1.976432 -0.166244  
H 7.283843 -0.309406 -0.536668  
C 1.305039 2.281683 -0.323612  
C 0.651130 2.683470 0.851993  
C 1.638814 3.250781 -1.288091  
C 0.337705 4.029150 1.064639  
H 0.365969 1.943381 1.602417  
C 1.324783 4.593642 -1.073724  
H 2.147482 2.958409 -2.210133  
C 0.673059 4.984292 0.102573  
H -0.180669 4.326765 1.978863  
H 1.587590 5.339280 -1.827965  
H 0.424282 6.035821 0.265274  
C -2.489801 1.285618 -0.134514  
C -2.694660 1.532827 1.243779  
C -3.062304 2.154701 -1.085371  
C -3.432932 2.673452 1.609896  
C -3.794547 3.274451 -0.698582  
C -3.970120 3.541722 0.661817  
H -3.589313 2.877148 2.728711  
H -4.223755 3.934534 -1.455865  
H -4.532642 4.421572 0.983641  
C -2.684521 -1.286280 -1.502438  
C -2.211237 -2.271965 -2.387104  
C -4.042344 -1.274057 -1.149894  
C -3.085210 -3.220750 -2.920075  
H -1.153157 -2.302876 -2.664925  
C -4.913494 -2.231647 -1.681272  
H -4.428497 -0.511985 -0.469853  
C -4.439355 -3.203472 -2.565755  
H -2.708525 -3.977959 -3.612129  
H -5.970374 -2.211369 -1.404259  
H -5.123312 -3.947486 -2.981055  
C -0.991710 -2.752312 0.926298  
C 0.093645 -3.016622 1.835238  
C -0.134723 -3.021473 3.350627  
C 1.064949 -2.499769 4.155573  
C 1.410113 -1.037437 3.830300  
C 1.851571 -0.799737 2.375139  
H -1.983849 -2.539087 1.339054  
H -1.027488 -3.289123 -0.028501  
H 0.821199 -3.776622 1.507643  
H 1.057411 -1.979391 1.887780  
H -1.021505 -2.405010 3.580136  
H -0.385438 -4.049631 3.662537  
H 1.946925 -3.136837 3.957297  
H 0.850424 -2.597195 5.232034  
H 0.527227 -0.409154 4.053013  
H 2.204907 -0.687195 4.512832  
H 1.977567 0.276831 2.189466  
H 2.828391 -1.268807 2.169504  
H 3.891944 2.317273 -0.240106  
H -2.939424 1.953275 -2.151692  
C 3.102104 -2.277407 -1.154408  
C 3.141617 -2.726454 -2.620799  
H 2.056512 -2.090599 -0.852348  
H 3.446132 -3.106589 -0.513936  
H 2.829792 -1.919355 -3.302226  
H 4.162254 -3.019819 -2.912202  
H 2.481935 -3.593535 -2.786051  
C -2.257687 0.605566 2.358188  
C -3.337046 -0.423442 2.714924  
H -2.010499 1.203495 3.249961  
H -1.328335 0.071280 2.095320  
H -3.003906 -1.083677 3.530966  
H -4.260623 0.079900 3.041032  
H -3.590818 -1.051811 1.847266

H -0.741947 1.657581 -2.180201  
H 0.702818 -1.060598 -2.516454  
H 1.274172 0.500658 -3.114693  
C 3.022870 -0.972385 -0.878492  
C 3.013348 -2.266803 -0.302613  
C 4.110684 -0.570913 -1.677961  
C 4.111679 -3.108313 -0.552386  
C 5.185570 -1.426497 -1.913493  
C 5.185546 -2.702547 -1.344247  
H 4.118845 -4.108305 -0.110038  
H 6.020249 -1.095281 -2.535749  
H 6.023863 -3.382527 -1.514668  
C 2.365792 1.868999 -0.718169  
C 1.851212 2.907204 -1.513048  
C 3.439656 2.147769 0.148343  
C 2.388770 4.196362 -1.432904  
H 1.029521 2.730141 -2.207544  
C 3.978572 3.433030 0.219511  
H 3.867994 1.353223 0.762095  
C 3.450273 4.463827 -0.565707  
H 1.976220 4.991539 -2.058604  
H 4.816767 3.630152 0.892249  
H 3.870122 5.470738 -0.505490  
C -2.940985 1.314296 -0.539984  
C -2.625946 2.535210 0.115840  
C -4.208575 1.134081 -1.117367  
C -3.617435 3.525361 0.171970  
C -5.179192 2.135588 -1.043679  
C -4.881191 3.332559 -0.393851  
H -3.405169 4.472574 0.669102  
H -6.160130 1.977652 -1.498062  
H -5.630354 4.125489 -0.327740  
C -2.544366 -1.528158 -1.179588  
C -3.546712 -2.017030 -0.319351  
C -2.194721 -2.281687 -2.312304  
C -4.186990 -3.226459 -0.593203  
H -3.841624 -1.441405 0.560635  
C -2.833115 -3.497220 -2.578429  
H -1.422202 -1.934900 -3.000353  
C -3.828484 -3.972642 -1.721240  
H -4.969572 -3.587681 0.078385  
H -2.551251 -4.071291 -3.464409  
H -4.327895 -4.921193 -1.932708  
C 1.469692 0.765287 2.395656  
C 0.474218 0.296366 3.328773  
C 0.814082 -0.808181 4.336108  
C -0.350780 -1.768101 4.617971  
C -0.798264 -2.526601 3.358781  
C -1.359333 -1.626139 2.243543  
H 2.457857 0.290015 2.420211  
H 1.504782 1.832365 2.151418  
H -0.194988 1.066594 3.744416  
H -0.557333 -0.454547 2.721488  
H 1.673727 -1.386571 3.953809  
H 1.153088 -0.332677 5.272059  
H -1.205661 -1.202370 5.032839  
H -0.049804 -2.487585 5.396251  
H 0.064666 -3.096127 2.968334  
H -1.557646 -3.280727 3.631090  
H -1.486283 -2.206935 1.318973  
H -2.348784 -1.224875 2.518396  
H 4.122671 0.429487 -2.116066  
H -4.446640 0.203518 -1.635455  
C 1.863697 -2.818119 0.514972  
C 0.737786 -3.420216 -0.334172  
H 1.458487 -2.025639 1.173175  
H 2.250466 -3.587191 1.201566  
H 1.121374 -4.320138 -0.973913  
H -0.060348 -3.837796 0.298969  
H 0.278064 -2.669884 -0.994338  
C -1.258454 2.765897 0.737617  
C -0.947000 4.166771 1.256964  
H -0.479073 2.501237 0.004286  
H -1.137384 2.050678 1.573989  
H -1.615708 4.462659 2.080026  
H 0.085552 4.201875 1.637622  
H -1.030215 4.922172 0.459595

<sup>4</sup>TS5-6C-22  
Geometry with 83 atoms:  
Total energy: -3124.181851720  
Cr 0.265793 -1.069454 0.779818  
P 1.601834 0.496984 -0.613124  
P -1.472120 -0.116029 -0.775561  
C -0.593605 0.604134 -2.287212  
C 0.896396 0.240353 -2.317232  
H -1.104972 0.256185 -3.196495  
H -0.707380 1.695971 -2.240096  
H 1.039828 -0.819769 -2.573936  
H 1.438778 0.835401 -3.068418  
C 3.421532 0.243195 -0.679375  
C 3.953587 -1.056320 -0.873096  
C 4.292198 1.318327 -0.417503

<sup>4</sup>TS5-6C-23  
Geometry with 83 atoms:  
Total energy: -3124.185091540  
Cr 0.021675 -0.194625 1.208585  
P 1.609434 0.194744 -0.682694  
P -1.651582 0.001519 -0.711628  
C -0.732395 0.559599 -2.238403  
C 0.699383 0.020366 -2.306974  
H -1.312647 0.297409 -3.136582

<sup>4</sup>TS5-6C-24  
Geometry with 83 atoms:  
Total energy: -3124.184002330

Cr 0.043036 -0.539753 1.147039  
P -1.620042 -0.292329 -0.767087  
P 1.596633 0.105589 -0.772438  
C 0.650114 0.171194 -2.390147  
C -0.649764 -0.633457 -2.322151  
H 0.449636 1.229167 -2.608657  
H 1.298867 -0.204531 -3.194275  
H -1.278772 -0.471260 -3.210614  
H -0.439227 -1.713740 -2.292239  
C -2.300936 1.412842 -0.991212  
C -2.933799 2.080089 0.086643  
C -2.184439 2.069250 -2.231831  
C -3.386232 3.394871 -0.111018  
C -2.638817 3.377082 -2.404239  
C -3.234860 4.047865 -1.334023  
H -3.876858 3.911213 0.718908  
H -2.532850 3.865060 -3.375857  
H -3.595516 5.072123 -1.455717  
C -3.052633 -1.428043 -0.949262  
C -2.807163 -2.813485 -0.979633  
C -4.373136 -0.964662 -1.057675  
C -3.862455 -3.715411 -1.124371  
H -1.787606 -3.197900 -0.893604  
C -5.428305 -1.872998 -1.192055  
H -4.585185 0.106079 -1.044777  
C -5.176847 -3.246798 -1.227015  
H -3.657951 -4.788476 -1.152227  
H -6.452201 -1.500372 -1.275328  
H -6.003276 -3.953492 -1.334526  
C 3.088000 -0.895228 -1.196468  
C 3.373671 -2.159688 -0.628950  
C 3.945966 -0.362441 -2.181410  
C 4.526821 -2.835274 -1.070164  
C 5.081319 -1.051411 -2.600732  
C 5.374145 -2.296663 -2.036629  
H 4.759547 -3.811882 -0.636973  
H 5.734901 -0.616950 -3.360707  
H 6.263408 -2.848735 -2.350647  
C 2.195807 1.824805 -0.514279  
C 3.498391 2.100282 -0.066750  
C 1.261942 2.875829 -0.591883  
C 3.864783 3.406645 0.272014  
H 4.233713 1.298259 0.020464  
C 1.633949 4.178190 -0.252572  
H 0.232578 2.687890 -0.907374  
C 2.937146 4.447663 0.178998  
H 4.883230 3.608361 0.612930  
H 0.898589 4.983461 -0.323125  
H 3.227047 5.466820 0.445839  
C -1.318517 -1.887798 2.024582  
C -0.219916 -1.812628 2.957254  
C -0.389537 -1.207609 4.354507  
C 0.877405 -0.500981 4.859015  
C 1.253488 0.710788 3.990986  
C 1.587069 0.382052 2.523612  
H -2.277005 -1.441094 2.315312  
H -1.432992 -2.791930 1.418763  
H 0.457343 -2.681676 2.957990  
H 0.745909 -0.881899 2.592589  
H -1.226256 -0.488822 4.338230  
H -0.683676 -2.013674 5.047618  
H 1.717138 -1.220502 4.879685  
H 0.725385 -0.174040 5.900126  
H 0.416785 1.430274 4.019660  
H 2.114384 1.233830 4.443424  
H 1.613240 1.309244 1.934388  
H 2.579930 -0.090927 2.436539  
H -1.743254 1.563470 -3.090302  
H 3.726563 0.614250 -2.620188  
C -3.130572 1.450896 1.449098  
C -2.032524 1.842886 2.441764  
H -3.186685 0.355550 1.365948  
H -4.107027 1.768877 1.848264  
H -2.181677 1.355242 3.416794  
H -1.033564 1.560776 2.065748  
H -2.008428 2.931849 2.603381  
C 2.479819 -2.861082 0.371717  
C 1.332818 -3.641172 -0.284816  
H 2.073714 -2.135885 1.092000  
H 3.091038 -3.557619 0.966673  
H 0.712680 -4.148447 0.471389

H 0.679883 -2.974989 -0.870991  
H 1.719560 -4.406183 -0.976024

#### \*TS5-6C-25

Geometry with 83 atoms:

Total energy: -3124.185894760  
Cr 0.042581 -0.235317 1.213366  
P 1.573537 0.360954 -0.673786  
P -1.678063 0.104651 -0.676940  
C -0.790994 0.778595 -2.177714  
C 0.657351 0.299675 -2.300803  
H -1.376085 0.549879 -3.082141  
H -0.840505 1.869895 -2.054389  
H 0.700215 -0.755575 -2.611159  
H 1.209066 0.873952 -3.061843  
C 3.041588 -0.708661 -1.001927  
C 3.118708 -2.054896 -0.565910  
C 4.090160 -0.163627 -1.769085  
C 4.262972 -2.795489 -0.912161  
C 5.210781 -0.921952 -2.103493  
C 5.298298 -2.246293 -1.667749  
H 4.336573 -3.832818 -0.574487  
H 6.012611 -0.477272 -2.697522  
H 6.173820 -2.851943 -1.914490  
C 2.256999 2.064798 -0.562744  
C 1.691628 3.142690 -1.264227  
C 3.333317 2.314525 0.310306  
C 2.182948 4.440768 -1.088730  
H 0.867096 2.989958 -1.960599  
C 3.825003 3.609768 0.477421  
H 3.805112 1.490731 0.848552  
C 3.247192 4.678800 -0.216493  
H 1.732098 5.266592 -1.644452  
H 4.666722 3.784184 1.152076  
H 3.632041 5.692634 -0.082930  
C -2.999548 1.374238 -0.452462  
C -2.714449 2.564765 0.258098  
C -4.253752 1.211571 -1.069384  
C -3.713844 3.549034 0.333829  
C -5.231584 2.202164 -0.975272  
C -4.960011 3.376544 -0.269145  
H -3.502259 4.472402 0.880614  
H -6.199934 2.057568 -1.462000  
H -5.716533 4.161442 -0.192483  
C -2.541023 -1.413928 -1.230069  
C -3.543377 -1.959162 -0.404208  
C -2.169734 -2.106323 -2.394479  
C -4.164613 -3.161592 -0.744007  
H -3.852319 -1.434055 0.502440  
C -2.788794 -3.315791 -2.726674  
H -1.395388 -1.716722 -3.057128  
C -3.785816 -3.845848 -1.904248  
H -4.947604 -3.566548 -0.098372  
H -2.490098 -3.842192 -3.636415  
H -4.270376 -4.789180 -2.167249  
C 1.620986 0.452230 2.428575  
C 0.719177 -0.214906 3.336368  
C 1.135100 -1.502815 4.052854  
C -0.037684 -2.465374 4.288282  
C -0.645554 -2.969285 2.970100  
C -1.247078 -1.874301 2.069130  
H 2.599697 -0.009206 2.250450  
H 1.648483 1.547517 2.422153  
H 0.111977 0.444524 3.973963  
H -0.368207 -0.819412 2.698570  
H 1.913587 -2.014682 3.460127  
H 1.606098 -1.229070 5.012147  
H -0.815702 -1.959207 4.889856  
H 0.305745 -3.324205 4.887021  
H 0.142546 -3.503624 2.410405  
H -1.422819 -3.723351 3.186213  
H -1.421750 -2.284946 1.065851  
H -2.217943 -1.525178 2.458073  
H 4.035000 0.874669 -2.102544  
H -4.472852 0.303483 -1.633527  
C 2.023013 -2.765931 0.201120  
C 0.891264 -3.300081 -0.685474  
H 1.604890 -2.100268 0.975056  
H 2.470506 -3.605262 0.755577  
H 0.155521 -3.864888 -0.092415  
H 0.348600 -2.486960 -1.189118

H 1.284129 -3.969933 -1.466097  
C -1.409213 2.812280 0.987678  
C -1.483869 2.400159 2.462813  
H -1.156258 3.882401 0.921139  
H -0.570365 2.288339 0.497811  
H -1.699732 1.323324 2.564333  
H -0.540797 2.617202 2.987297  
H -2.291964 2.941220 2.979239

#### \*TS5-6C-26

Geometry with 83 atoms:

Total energy: -3124.184430840  
Cr 0.067100 -0.819367 1.054618  
P 1.516671 0.444263 -0.523590  
P -1.545220 -0.022778 -0.716393  
C -0.634330 -0.015581 -2.338997  
C 0.763158 0.608331 -2.246687  
H -0.571001 -1.079823 -2.611190  
H -1.248483 0.462747 -3.117227  
H 1.445077 0.154815 -2.979504  
H 0.725206 1.683397 -2.466279  
C 3.122740 -0.426174 -0.769683  
C 3.121887 -1.784529 -1.172505  
C 4.337765 0.201589 -0.442836  
C 4.353787 -2.450775 -1.271833  
C 5.549365 -0.483511 -0.547534  
C 5.558403 -1.814160 -0.970791  
H 4.361709 -3.499872 -1.581106  
H 6.482570 0.023757 -0.291550  
H 6.500803 -2.360976 -1.053277  
C 1.883954 2.192934 -0.107559  
C 2.637106 3.000861 -0.981281  
C 1.308700 2.773593 1.032593  
C 2.816435 4.357646 -0.707950  
H 3.085648 2.569721 -1.880200  
C 1.483486 4.134753 1.300158  
H 0.701662 2.171800 1.709184  
C 2.238709 4.927211 0.433145  
H 3.406569 4.974605 -1.389983  
H 1.019786 4.574752 2.168081  
H 2.375726 5.991086 0.641900  
C -2.014988 1.722876 -0.367024  
C -2.558425 2.071331 0.894386  
C -1.789410 2.726426 -1.327861  
C -2.835005 3.424787 1.148221  
C -2.064681 4.064599 -1.048734  
C -2.585094 4.415868 0.199046  
H -3.263615 3.701710 2.115564  
H -1.876366 4.828340 -1.806596  
H -2.806939 5.460855 0.428939  
C -3.089555 -0.912631 -1.154020  
C -4.355415 -0.309961 -1.092840  
C -2.987895 -2.261692 -1.544546  
C -5.498751 -1.043902 -1.424491  
H -4.453245 0.734896 -0.791198  
C -4.131356 -2.987740 -1.881974  
H -2.011948 -2.755183 -1.584221  
C -5.390035 -2.379774 -1.820319  
H -6.479716 -0.564951 -1.376010  
H -4.040219 -4.032707 -2.188168  
H -6.285827 -2.949110 -2.080004  
C 1.773272 -0.577202 2.300302  
C 0.935002 -1.535446 2.978351  
C 1.331951 -3.015934 2.994416  
C 0.131157 -3.972279 3.028478  
C -0.800631 -3.814204 1.815941  
C -1.442378 -2.420790 1.706834  
H 2.705826 -0.939909 1.854370  
H 1.858831 0.431939 2.718728  
H 0.480178 -1.197395 3.923338  
H -0.299819 -1.716852 2.392077  
H 1.944708 -3.232194 2.100677  
H 1.986996 -3.194869 3.864135  
H -0.448613 -3.796542 3.953439  
H 0.495214 -5.010882 3.085038  
H -0.228914 -4.036220 0.894114  
H -1.593572 -4.582500 1.863492  
H -2.109152 -2.362805 0.840863  
H -2.068822 -2.218119 2.593735  
H 4.344756 1.234501 -0.093416  
H -1.397419 2.473029 -2.313270

C 1.860571 -2.564078 -1.493115  
C 1.658579 -2.841504 -2.987592  
H 0.972821 -2.039468 -1.095008  
H 1.896127 -3.526060 -0.954382  
H 2.496223 -3.430056 -3.393031  
H 0.733106 -3.413454 -3.161964  
H 1.602917 -1.909758 -3.570932  
C -2.854031 1.060567 1.986406  
C -1.850661 1.105441 3.147522  
H -2.900259 0.040378 1.577042  
H -3.862496 1.263951 2.383041  
H -0.824936 0.874663 2.809358  
H -1.817802 2.104012 3.610532  
H -2.115787 0.375616 3.928012

<sup>4</sup>T5-6C-27

Geometry with 83 atoms:

Total energy: -3124.182427260

Cr 0.141804 -0.286150 1.151240  
P 1.672072 0.443236 -0.644190  
P -1.497363 0.025355 -0.805461  
C -0.576107 0.788001 -2.242479  
C 0.878622 0.320486 -2.336613  
H -1.130951 0.604451 -3.176146  
H -0.615684 1.873763 -2.057768  
H 0.956797 -0.719614 -2.678434  
H 1.441131 0.933726 -3.055580  
C 3.218232 -0.552442 -0.728178  
C 3.145237 -1.961015 -0.885300  
C 4.469952 0.062391 -0.543004  
C 4.347113 -2.686799 -0.907788  
C 5.647756 -0.686089 -0.551511  
C 5.586983 -2.066867 -0.748141  
H 4.302343 -3.771268 -1.043617  
H 6.608857 -0.187023 -0.407119  
H 6.502458 -2.663157 -0.768069  
C 2.137186 2.224848 -0.628020  
C 2.940609 2.765005 -1.650980  
C 1.614880 3.088471 0.348180  
C 3.223567 4.131319 -1.683516  
H 3.356307 2.115137 -2.424945  
C 1.891305 4.458976 0.308704  
H 0.982909 2.700355 1.147511  
C 2.698384 4.981926 -0.703869  
H 3.854595 4.534511 -2.479231  
H 1.474122 5.117152 1.074694  
H 2.918078 6.051930 -0.732842  
C -2.974702 1.124012 -0.661431  
C -3.058590 2.171255 0.286467  
C -4.011343 0.949921 -1.602100  
C -4.197098 2.998472 0.257825  
C -5.127756 1.781934 -1.607953  
C -5.220891 2.813189 -0.668138  
H -4.271347 3.815183 0.981327  
H -5.919076 1.628378 -2.345411  
H -6.088808 3.477224 -0.662164  
C -2.168442 -1.566124 -1.432921  
C -3.236976 -2.174279 -0.745721  
C -1.591636 -2.241215 -2.521959  
C -3.711409 -3.426678 -1.139277  
H -3.713939 -1.658838 0.090527  
C -2.066653 -3.498616 -2.909326  
H -0.774143 -1.795882 -3.089202  
C -3.123632 -4.095818 -2.218441  
H -4.546964 -3.880895 -0.601238  
H -1.609153 -4.007831 -3.761133  
H -3.494847 -5.076915 -2.524195  
C 1.805064 0.206407 2.372561  
C 0.706707 -0.029819 3.283358  
C 0.759982 -1.179658 4.299302  
C -0.605576 -1.829683 4.558450  
C -1.160985 -2.504438 3.294815  
C -1.447940 -1.549732 2.119345  
H 2.592416 -0.556722 2.320564  
H 2.191806 1.223264 2.261350  
H 0.240233 0.877669 3.698634  
H -0.413336 -0.559604 2.672020  
H 1.462098 -1.947637 3.931072  
H 1.189479 -0.788619 5.236698  
H -1.318996 -1.067428 4.923963  
H -0.510424 -2.575510 5.363899

H -0.432915 -3.267479 2.965821  
H -2.084356 -3.056354 3.543782  
H -1.558280 -2.141680 1.200166  
H -2.387128 -0.994855 2.273558  
H 4.532503 1.139701 -0.382343  
H -3.945511 0.147069 -2.339544  
C 1.846982 -2.746756 -0.934293  
C 1.448099 -3.309910 0.436629  
H 1.955835 -3.579424 -1.647866  
H 1.015205 -2.139179 -1.316187  
H 0.493279 -3.855234 0.377256  
H 2.215250 -3.994565 0.829857  
H 1.335040 -2.500703 1.179878  
C -2.005708 2.472969 1.335151  
C -2.462119 2.194703 2.771742  
H -1.716211 3.533692 1.244348  
H -1.084447 1.905354 1.127049  
H -1.671756 2.458701 3.492645  
H -3.354984 2.785147 3.028733  
H -2.715993 1.133267 2.913297

<sup>4</sup>T5-6C-28

Geometry with 83 atoms:

Total energy: -3124.182913700

Cr 0.131924 -1.063421 0.790395  
P -1.624304 -0.182151 -0.761359  
P 1.422978 0.428573 -0.750781  
C 0.579080 0.553331 -2.428774  
C -0.807874 -0.109866 -2.437134  
H 0.506354 1.621988 -2.669695  
H 1.233428 0.098129 -3.185928  
H -1.485126 0.361313 -3.165547  
H -0.729903 -1.167173 -2.733230  
C -2.108510 1.552451 -0.351304  
C -2.622089 1.874875 0.929783  
C -1.920392 2.578666 -1.295897  
C -2.896198 3.221492 1.219146  
C -2.193760 3.910073 -0.982861  
C -2.676910 4.234657 0.285914  
H -3.298315 3.475100 2.204169  
H -2.031888 4.688633 -1.731700  
H -2.894607 5.273633 0.544981  
C -3.185285 -1.070280 -1.151275  
C -3.103636 -2.399444 -1.606051  
C -4.447228 -0.469974 -1.017305  
C -4.261630 -3.110268 -1.925755  
H -2.131471 -2.887919 -1.716196  
C -5.605390 -1.189218 -1.328953  
H -4.532200 0.562519 -0.673090  
C -5.516221 -2.507249 -1.783725  
H -4.184855 -4.140182 -2.282703  
H -6.582064 -0.711528 -1.219098  
H -6.423009 -3.065600 -2.028724  
C 3.094544 -0.264658 -1.095569  
C 3.207275 -1.587159 -1.593179  
C 4.254668 0.478891 -0.815976  
C 4.492375 -2.091072 -1.848059  
C 5.521643 -0.054470 -1.057498  
C 5.639888 -1.339819 -1.589581  
H 4.595946 -3.100524 -2.254138  
H 6.412006 0.537822 -0.833703  
H 6.625796 -1.762880 -1.797046  
C 1.648749 2.176212 -0.246707  
C 1.189628 2.601687 1.010134  
C 2.209256 3.120241 -1.127463  
C 1.291603 3.945144 1.383044  
H 0.730962 1.892324 1.700717  
C 2.308539 4.461008 -0.752642  
H 2.574351 2.808934 -2.109732  
C 1.849354 4.875424 0.503169  
H 0.923539 4.263986 2.360957  
H 2.745695 5.186149 -1.443375  
H 1.925661 5.926235 0.793106  
C -1.250408 -2.572418 1.321467  
C -0.058064 -2.877884 2.071464  
C -0.017050 -2.749291 3.597705  
C 1.371303 -2.369935 4.133195  
C 1.852886 -1.001672 3.624011  
C 2.017578 -0.911208 2.096389  
H -2.125552 -2.194188 1.863382  
H -1.511786 -3.216443 0.476501

H 0.519901 -3.740749 1.703523  
H 0.966802 -1.966108 1.879118  
H -0.752221 -1.990796 3.915156  
H -0.348173 -3.705947 4.036047  
H 2.101641 -3.147533 3.841869  
H 1.349104 -2.365615 5.234904  
H 1.138169 -0.229318 3.962301  
H 2.814646 -0.751465 4.106199  
H 2.287714 0.114111 1.811559  
H 2.839935 -1.556771 1.743977  
H -1.558326 2.351945 -2.298332  
H 4.174010 1.485901 -0.404653  
C -2.882303 0.846173 2.012544  
C -1.730498 0.718311 3.014704  
H -3.102630 -0.138278 1.573910  
H -3.794332 1.138631 2.557385  
H -1.981875 0.016675 3.824225  
H -0.815525 0.340850 2.523980  
H -1.478502 1.689936 3.467069  
C 2.009847 -2.491837 -1.835336  
C 2.065825 -3.816555 -1.064978  
H 1.916927 -2.697535 -2.916344  
H 1.076033 -1.976525 -1.556073  
H 1.143997 -4.398877 1.224281  
H 2.911522 -4.443026 -1.385167  
H 2.178390 -3.640224 0.016462

<sup>4</sup>T5-10A-01

Geometry with 77 atoms:

Total energy: -3045.582605600

Cr -0.076188 -0.716797 1.142298  
P 1.768536 0.292844 -0.489471  
P -1.487854 0.479521 -0.559978  
C -0.449146 1.063265 -2.012371  
C 0.893286 0.327226 -2.133304  
H -1.032325 0.965800 -2.940626  
H -0.279189 2.138253 -1.845758  
H 0.740564 -0.720854 -2.437191  
H 1.529958 0.804792 -2.894714  
C 3.319173 -0.639866 -0.746430  
C 3.557666 -1.441314 -1.225408  
C 4.268470 -0.625891 0.295081  
C 4.724002 -2.210399 -1.959876  
H 2.846386 -1.469424 -2.703236  
C 5.432494 -1.389509 0.202908  
H 4.101442 -0.004042 1.179405  
C 5.661591 -2.186851 -0.924653  
H 4.901399 -2.825641 -2.845350  
H 6.164036 -1.363008 1.014302  
H 6.572136 -2.786518 -0.995351  
C 2.270333 2.043696 -0.250789  
C 3.487613 2.546877 -0.742748  
C 1.376610 2.918720 0.393491  
C 3.801044 3.899780 -0.589810  
H 4.195293 1.881917 -1.242937  
C 1.689551 4.273436 0.533502  
H 0.427942 2.549818 0.787404  
C 2.903655 4.765077 0.045661  
H 4.751379 4.280588 -0.972019  
H 0.982591 4.942095 1.030582  
H 3.152775 5.822690 0.162075  
C -2.710844 -0.681458 -1.276881  
C -4.047155 -0.680857 -0.845772  
C -2.276837 -1.678902 -2.168255  
C -4.932988 -1.659825 -1.304994  
H -4.401607 0.082613 -0.150323  
C -3.166293 -2.653730 -2.625537  
H -1.240456 -1.705114 -2.512339  
C -4.496373 -2.647858 -2.192100  
H -5.971165 -1.649104 -0.964673  
H -2.818766 -3.420666 -3.322001  
H -5.191530 3.412234 -2.547299  
C -2.430878 1.958153 -0.047323  
C -3.178034 2.696500 -0.983179  
C -2.387146 2.377964 1.291563  
C -3.864061 3.843403 -0.580935  
H -3.229979 2.372854 -2.025897  
C -3.077140 3.527619 1.689699  
H -1.814912 1.805968 2.024031  
C -3.813168 4.260458 0.754884  
H -4.442734 4.413613 -1.311693

H -3.040126 3.848317 2.733479  
H -4.352733 5.158319 1.066240  
C 1.302022 -2.393248 1.721615  
C 0.541321 -2.999609 0.528080  
C -0.345986 -4.208941 0.844790  
C -1.436034 -3.977572 1.897335  
C -2.373001 -2.792428 1.611787  
C -1.828742 -1.425569 2.045713  
H 2.330315 -2.150598 1.436184  
H 1.313587 -3.118798 2.541183  
H -0.110389 -2.291934 -0.073372  
H 1.292511 -3.263784 -0.235049  
H -0.820007 -4.536911 -0.096667  
H 0.308753 -5.036665 1.167052  
H -0.976083 -3.844655 2.893525  
H -2.026058 -4.906443 1.966460  
H -2.638423 -2.785459 0.539294  
H -3.327747 -2.977668 2.139546  
H -2.609483 -0.656110 1.904011  
H -1.625502 -1.448351 3.132624  
C 0.534030 0.333652 2.827235  
C 1.109092 -0.929789 3.178910  
H -0.368931 0.642593 3.364423  
H 1.217691 1.148110 2.564107  
H 2.194778 -0.993141 3.288230  
H 0.564143 -1.546818 3.897618

\*TS9-10A-02

Geometry with 77 atoms:

Total energy: -3045.579037430  
Cr -0.070479 -0.690795 1.146988  
P 1.774345 0.286562 -0.492812  
P -1.470630 0.490031 -0.587434  
C -0.424998 1.073417 -2.033182  
C 0.918553 0.337626 -2.145669  
H -1.001983 0.974484 -2.965005  
H -0.254996 2.148403 -1.866653  
H 0.772219 -0.706632 -2.464125  
H 1.564734 0.823783 -2.893442  
C 3.323525 -0.651520 -0.739589  
C 3.566674 -1.449825 -1.870000  
C 4.264318 -0.647608 0.309672  
C 4.729023 -2.225386 -1.948281  
H 2.861970 -1.470782 -2.703617  
C 5.424632 -1.417686 0.223509  
H 4.094922 -0.027965 1.194934  
C 5.658331 -2.211643 -0.905438  
H 4.909918 -2.837966 -2.834906  
H 6.149883 -1.398514 1.040724  
H 6.565934 -2.816299 -0.971316  
C 2.274869 2.035234 -0.238043  
C 3.498947 2.540598 -0.709975  
C 1.370015 2.907086 0.395233  
C 3.808682 3.893388 -0.548108  
H 4.214420 1.877721 -1.201869  
C 1.679576 4.261517 0.544133  
H 0.415306 2.534240 0.772697  
C 2.900753 4.755601 0.076329  
H 4.764226 4.276455 -0.914764  
H 0.965048 4.928434 1.032591  
H 3.146980 5.813094 0.199816  
C -2.670187 -0.693870 -1.313194  
C -4.022138 -0.683493 -0.932913  
C -2.204879 -1.712835 -2.163702  
C -4.891511 -1.673138 -1.401801  
H -4.401947 0.097465 -0.270828  
C -3.077856 -2.697332 -2.631699  
H -1.157180 -1.748269 -2.469539  
C -4.423308 -2.681361 -2.249002  
H -5.941812 -1.653555 -1.101253  
H -2.705253 -3.480635 -3.296286  
H -5.105492 -3.453610 -2.612230  
C -2.436702 1.956984 -0.088101  
C -3.079021 2.763061 -1.045531  
C -2.525863 2.291261 1.272696  
C -3.793979 3.891791 -0.641983  
H -3.025389 2.509439 -2.107419  
C -3.246963 3.421110 1.671856  
H -2.035155 1.666908 2.022000  
C -3.878392 4.221670 0.716226  
H -4.289543 4.515938 -1.389565

H -3.314612 3.674408 2.732560  
H -4.440409 5.105370 1.028372  
C 1.232728 -2.391444 1.730858  
C 0.470453 -2.997327 0.529873  
C -0.469056 -4.176245 0.829376  
C -1.878336 -3.804701 1.304131  
C -1.936666 -2.835232 2.495224  
C -1.813683 -1.352914 2.116690  
H 2.264977 -2.160833 1.446386  
H 1.237040 -3.120303 2.546875  
H -0.134657 -2.274970 -0.099898  
H 1.245873 -3.296389 -0.194600  
H -0.556015 -4.781519 -0.088482  
H 0.019936 -4.824352 1.577247  
H -2.398694 -4.742157 1.561575  
H -2.443674 -3.367315 0.460955  
H -2.902876 -2.987067 3.012673  
H -1.167595 -3.120371 3.237172  
H -2.684726 -1.086960 1.492487  
H -1.894094 -0.733201 3.027788  
C 0.621407 0.363950 2.803008  
C 1.052593 -0.943917 3.194026  
H -0.253849 0.784447 3.307777  
H 1.392159 1.095499 2.537752  
H 2.119688 -1.107350 3.366309  
H 0.411229 -1.499836 3.883298

\*TS9-10A-03

Geometry with 77 atoms:

Total energy: -3045.573565750  
Cr 0.081503 -0.687999 1.086981  
P 1.328406 0.778147 -0.655729  
P -1.826246 -0.015282 -0.446506  
C -1.158152 0.924373 -1.921744  
C 0.317699 0.620077 -2.209190  
H -1.784570 0.727503 -2.805226  
H -1.284215 1.989937 -1.674288  
H 0.447832 -0.412603 -2.569055  
H 0.711062 1.298657 -2.982228  
C 3.049867 0.373382 -1.106737  
C 3.408048 -0.210250 -2.333062  
C 4.041118 0.576987 -0.127595  
C 4.733834 -0.587220 -2.570579  
H 2.664066 -0.379747 -3.113390  
C 5.362905 0.202154 -0.371046  
H 3.780350 1.037519 0.828873  
C 5.711127 -0.385930 -1.592441  
H 5.002038 -1.040445 -3.527981  
H 6.123274 0.366437 0.396202  
H 6.745088 -0.684096 -1.781555  
C 1.322726 2.580680 -0.306878  
C 2.227274 3.469783 -0.913129  
C 0.348156 3.087665 0.570170  
C 2.148613 4.838945 -0.647421  
H 2.999284 3.093863 -1.588563  
C 0.265160 4.458622 0.826611  
H -0.363129 2.412093 1.050574  
C 1.167653 5.335845 0.218423  
H 2.857303 5.522958 -1.120727  
H -0.503360 4.838745 1.503972  
H 1.109793 6.408045 0.421162  
C -2.699432 -1.473246 -1.130039  
C -3.725599 -2.070957 -0.374952  
C -2.303573 -2.068573 -2.339416  
C -4.343643 -3.238762 -0.826619  
H -4.055323 -1.616708 0.562480  
C -2.925414 -3.238348 -2.786242  
H -1.510721 -1.627677 -2.947112  
C -3.943847 -3.826557 -2.031457  
H -5.144466 -3.689618 -0.235504  
H -2.611476 -3.689921 -3.730459  
H -4.429024 -4.740230 -2.383017  
C -3.156586 1.074897 0.188458  
C -4.284346 1.359876 -0.602448  
C -3.036442 1.673047 1.453374  
C -5.268511 2.231789 -0.133594  
H -4.398932 0.891693 -1.583444  
C -4.023230 2.547271 1.919915  
H -2.174481 1.454094 2.087911  
C -5.138952 2.827246 1.126730  
H -6.142623 2.446346 -0.753193

H -3.921369 3.004554 2.907058  
H -5.912430 3.507340 1.491731  
C 1.593216 -0.822715 2.656706  
C 2.577967 -1.811453 3.267999  
C 3.342101 -2.681901 2.262681  
C 2.539575 -3.591299 1.312647  
C 1.992205 -2.953709 0.017672  
C 0.575116 -2.382043 0.029361  
H 2.076855 -0.414139 1.745407  
H 1.381681 0.031488 3.321150  
H 3.324339 -1.237070 3.846405  
H 2.078929 -2.456558 4.013255  
H 3.995800 -2.033835 1.650360  
H 4.025379 -3.319428 2.848936  
H 1.725306 -4.101509 1.859096  
H 3.224651 -4.397815 1.004100  
H 2.712795 -2.198689 -0.340346  
H 2.004618 -3.740183 -0.762065  
H 0.265821 -2.138627 -1.003094  
H -0.145529 -3.134496 0.398007  
C -1.400018 -1.533195 2.368381  
C -0.235837 -1.885616 3.082810  
H -1.881552 -2.285503 1.737239  
H -2.072277 -0.777378 2.790220  
H -0.083732 -1.492566 4.090821  
H 0.189816 -2.878634 2.928200

\*TS9-10A-04

Geometry with 77 atoms:

Total energy: -3045.571346960  
Cr 0.100186 -0.504426 1.111554  
P 1.385559 0.661553 -0.754789  
P -1.787913 0.017466 -0.540331  
C -1.078208 0.905355 -2.019928  
C 0.376586 0.512784 -2.305096  
H -1.723002 0.752479 -2.898924  
H -1.143375 1.975555 -1.767822  
H 0.447831 -0.535832 -2.633785  
H 0.805945 1.139691 -3.102379  
C 3.108928 0.259807 -1.198300  
C 3.430383 -0.550936 -2.299908  
C 4.132720 0.678848 -0.328018  
C 4.756664 -0.928154 -2.529079  
H 2.654940 -0.899683 -2.984871  
C 5.454966 0.297670 -0.562388  
H 3.898223 1.311768 0.531980  
C 5.769483 -0.507723 -1.662299  
H 4.998310 -1.554775 -3.391051  
H 6.243358 0.632666 0.115991  
H 6.804716 -0.806024 -1.844186  
C 1.365983 -2.452186 -0.359907  
C 1.695062 3.442000 -1.301400  
C 0.975269 2.837716 0.934264  
C 1.622520 4.791826 -0.951761  
H 2.011766 3.160574 -2.309143  
C 0.904705 4.189542 1.284367  
H 0.730664 2.071642 1.679610  
C 1.226009 5.166621 0.338248  
H 1.879049 5.557595 -1.687732  
H 0.602244 4.477807 2.293970  
H 1.171824 6.224635 0.605905  
C -2.533387 -1.534455 -1.158533  
C -3.286768 -2.309810 -0.256680  
C -2.305635 -2.021918 -2.455112  
C -3.813463 -3.539912 -0.652183  
H -3.475058 -1.943933 0.755716  
C -2.828294 -3.259962 -2.843804  
H -1.721191 -1.448750 -3.177313  
C -3.582223 -4.019862 -1.946441  
H -4.404856 -4.127993 0.053769  
H -2.645356 -3.628719 -3.856017  
H -3.990280 -4.985668 -2.253811  
C -3.178938 1.099044 -0.033442  
C -4.514127 0.851883 -0.390122  
C -2.868642 2.240816 0.727833  
C -5.521235 1.733518 0.014823  
H -4.775102 -0.027422 -0.982224  
C -3.876756 3.122242 1.122489  
H -1.832630 2.452004 1.006654  
C -5.206474 2.866710 0.770200  
H -6.558175 1.532861 -0.265585

H -3.623847 4.008105 1.710230  
H -5.997395 3.551642 1.085220  
C 1.741366 -0.641404 2.629704  
C 2.334242 -1.858267 3.340984  
C 1.822090 -3.236357 2.894385  
C 2.267343 -3.741610 1.517091  
C 1.930829 -2.866230 0.299128  
C 0.496452 -2.334964 0.230733  
H 2.197455 -0.547794 1.627190  
H 1.991301 0.290393 3.157466  
H 3.435041 -1.829319 3.228817  
H 2.152405 -1.755316 4.424763  
H 2.149484 -3.978352 3.642268  
H 0.719116 -3.245098 2.940238  
H 1.806999 -4.734935 1.370019  
H 3.358165 -3.914148 1.530389  
H 2.654308 -2.035881 0.231683  
H 2.135418 -3.468837 -0.605792  
H 0.180188 -2.195691 -0.816837  
H -0.233101 -3.024929 0.693655  
C -1.404666 -0.673852 2.617211  
C -0.288925 -0.705884 3.474970  
H -1.930073 -1.610541 2.400786  
H -2.014270 0.234797 2.561144  
H -0.051102 0.184696 4.063117  
H -0.022229 -1.641887 3.964239

\*TS9-10A-05

Geometry with 77 atoms:

Total energy: -3045.571796370  
Cr 0.097611 -0.720155 1.096585  
P 1.372367 0.739960 -0.614929  
P -1.782725 -0.008999 -0.462447  
C -1.069027 0.881568 -1.945775  
C 0.400933 0.514351 -2.186000  
H -1.683523 0.680383 -2.836419  
H -1.165151 1.956364 -1.726342  
H 0.497898 -0.542826 -2.476661  
H 0.837554 1.127367 -2.989970  
C 3.109534 0.348368 -1.019413  
C 3.446320 -0.591756 -2.009053  
C 4.129330 0.895553 -0.217813  
C 4.778387 -0.975891 -2.189970  
H 2.678747 -1.032577 -2.647596  
C 5.457467 0.509722 -0.405258  
H 3.887248 1.630242 0.554343  
C 5.784873 -0.429978 -1.388650  
H 5.028658 -1.705187 -2.964174  
H 6.240553 0.944183 0.220824  
H 6.824523 -0.733880 -1.531965  
C 1.320179 2.551855 -0.344211  
C 1.979456 3.446558 -1.206265  
C 0.552461 3.060586 0.715754  
C 1.864488 4.823443 -1.008029  
H 2.590348 3.067210 -2.029291  
C 0.434413 4.440029 0.910138  
H 0.033475 2.379803 1.394941  
C 1.090925 5.321702 0.047819  
H 2.380461 5.513043 -1.680560  
H -0.170391 4.823391 1.735283  
H 1.002983 6.400432 0.198399  
C -2.720323 -1.430386 -1.134873  
C -3.770796 -1.978074 -0.376262  
C -2.340825 -2.057779 -2.333766  
C -4.434656 -3.124491 -0.817649  
H -4.081936 -1.502448 0.556703  
C -3.008833 -3.205748 -2.770298  
H -1.520683 -1.662920 -2.937296  
C -4.055305 -3.741389 -2.014553  
H -5.254730 -3.536047 -0.224296  
H -2.708192 -3.682579 -3.706390  
H -4.576393 -4.638199 -2.358056  
C -3.055439 1.143615 0.179220  
C -4.175207 1.483810 -0.600985  
C -2.895601 1.732752 1.444027  
C -5.110557 2.403184 -0.123059  
H -4.321643 1.022164 -1.580749  
C -3.833640 2.653916 1.920082  
H -2.040389 1.470292 2.071993  
C -4.940333 2.990498 1.136242  
H -5.978481 2.661211 -0.734757

H -3.701293 3.104443 2.906707  
H -5.675623 3.708159 1.508165  
C 1.582147 -0.800194 2.772851  
C 2.666985 -1.868156 2.905966  
C 3.258231 -2.408421 1.591076  
C 2.600232 -3.664696 1.009814  
C 1.084713 -3.608931 0.785095  
C 0.585530 -2.404058 -0.011246  
H 1.923636 -0.033903 2.043474  
H 1.468802 -0.246396 3.712536  
H 3.486418 -1.410973 3.489831  
H 2.308617 -2.704774 3.534405  
H 3.252998 -1.604153 0.838296  
H 4.323648 -2.640014 1.754474  
H 2.824037 -4.525239 1.665348  
H 3.091492 -3.884156 0.044775  
H 0.791260 -4.533057 0.251072  
H 0.560284 -3.681309 1.752718  
H 1.307769 -2.136615 -0.802079  
H -0.377614 -2.635077 -0.493807  
C -1.400268 -1.601222 2.329966  
C -0.339836 -1.657093 3.262268  
H -1.674827 -2.502124 1.771513  
H -2.223784 -0.905212 2.522207  
H -0.399504 -1.006087 4.137419  
H 0.169713 -2.603107 3.454449

\*TS9-10A-06

Geometry with 77 atoms:

Total energy: -3045.576289720  
Cr -0.071595 -0.678390 1.154994  
P 1.773874 0.268911 -0.472273  
P -1.463332 0.489542 -0.587886  
C -0.412272 1.057204 -2.034019  
C 0.928165 0.314210 -2.131522  
H -0.985151 0.951732 -2.967697  
H -0.239194 2.133046 -1.876543  
H 0.778859 -0.730460 -2.446496  
H 1.583081 0.793062 -2.876351  
C 3.320689 -0.675895 -0.714043  
C 3.563286 -1.475759 -1.843633  
C 4.263405 -0.668850 0.333447  
C 4.727020 -2.249002 -1.923235  
H 2.857757 -1.499329 -2.676377  
C 5.425164 -1.436749 0.245960  
H 4.095420 -0.047174 1.217555  
C 5.658484 -2.231563 -0.882432  
H 4.907349 -2.862229 -2.809532  
H 6.152268 -1.414600 1.061426  
H 6.567586 -2.833799 -0.949701  
C 2.284001 2.018509 -0.236364  
C 3.513673 2.509128 -0.709518  
C 1.380539 2.906437 0.376360  
C 3.830240 3.862747 -0.569161  
H 4.228153 1.834370 -1.186354  
C 1.697249 4.261415 0.504059  
H 0.421238 2.546158 0.754325  
C 2.923771 4.740709 0.034958  
H 4.789883 4.234025 -0.937229  
H 0.983722 4.940569 0.976860  
H 3.175117 5.798842 0.141434  
C -2.661246 -0.702945 -1.304346  
C -4.009171 -0.699282 -0.909338  
C -2.200233 -1.721895 -2.157592  
C -4.877886 -1.696216 -1.363555  
H -4.386396 0.082340 -0.246548  
C -3.072694 -2.713741 -2.610985  
H -1.156692 -1.751534 -2.477478  
C -4.413317 -2.705390 -2.211605  
H -5.924579 -1.681833 -1.050419  
H -2.703253 -3.496910 -3.277479  
H -5.094637 -3.483903 -2.562850  
C -2.433353 1.958616 -0.102144  
C -3.079679 2.753773 -1.065939  
C -2.524331 2.303323 1.255989  
C -3.800415 3.882015 -0.671262  
H -3.024900 2.491792 -2.125715  
C -3.251133 3.432622 1.646228  
H -2.031016 1.687150 2.010217  
C -3.886704 4.222222 0.684292  
H -4.299339 4.497612 -1.423671

H -3.320138 3.693849 2.704933  
H -4.453489 5.105307 0.989513  
C 1.206430 -2.358549 1.743328  
C 0.441085 -2.918434 0.524040  
C -0.491440 -4.114027 0.781200  
C -1.898721 -3.765564 1.279212  
C -1.949935 -2.815248 2.485315  
C -1.814705 -1.329748 2.125725  
H 2.248207 -2.158175 1.472893  
H 1.177157 -3.097829 2.549054  
H -0.181141 -2.174698 -0.067415  
H 1.207355 -3.179434 -0.223884  
H -0.581109 -4.682750 -0.159396  
H 0.005859 -4.788784 1.499167  
H -2.407336 -4.712008 1.526765  
H -2.477614 -3.318578 4.050698  
H -2.917061 -2.968471 3.000622  
H -1.182901 -3.116569 3.223097  
H -2.684961 -1.047338 1.508451  
H -1.884095 -0.720280 3.044166  
C 0.610079 0.391556 2.792287  
C 1.036830 -0.919823 3.181585  
H -0.262129 0.813523 3.300573  
H 1.383757 1.120858 2.530381  
H 2.102620 -1.081041 3.364668  
H 0.394619 -1.466821 3.877111

\*TS9-10A-07

Geometry with 77 atoms:

Total energy: -3045.569890560  
Cr 0.095625 -0.651222 1.030883  
P 1.356171 0.800012 -0.709161  
P -1.830260 0.102396 -0.467751  
C -1.142741 1.124659 -1.872579  
C 0.296134 0.731371 -2.234149  
H -1.812706 1.064102 -2.744428  
H -1.177355 2.167274 -1.518924  
H 0.335867 -0.301387 -2.614925  
H 0.704484 1.394554 -3.013138  
C 3.028055 0.328483 -1.178368  
C 3.279027 -0.542204 -1.319079  
C 4.078124 0.492888 -0.274723  
C 4.559431 -1.054613 -2.551762  
H 2.485449 -0.757321 -3.036999  
C 5.353653 -0.020953 -0.512815  
H 3.899726 1.100980 0.616153  
C 5.596540 -0.798132 -1.651008  
H 4.745610 -1.655920 -3.444933  
H 6.161832 0.187172 0.192509  
H 6.594976 -1.201445 -1.835981  
C 1.511531 2.589963 -0.355085  
C 2.189639 3.456215 -1.231095  
C 0.915546 3.112599 0.804142  
C 2.259831 4.821710 -0.950387  
H 2.672063 3.061041 -2.129258  
C 0.984019 4.481273 1.082071  
H 0.395068 2.448888 1.500012  
C 1.655478 5.335656 0.203849  
H 2.789587 5.489867 -1.633709  
H 0.515595 4.878048 1.985931  
H 1.713197 6.405300 0.419748  
C -2.708742 -1.309497 -1.230102  
C -3.575246 -2.064723 -0.417627  
C -2.468675 -1.726096 -2.549321  
C -4.198053 -3.206816 -0.922432  
H -3.774947 -1.751128 0.610005  
C -3.091718 -2.874961 -3.048473  
H -1.797853 -1.165295 -3.203048  
C -3.955281 -3.616457 -2.238641  
H -4.876259 -3.779839 -0.285487  
H -2.900822 -3.187847 -4.077888  
H -4.441647 -4.512273 -2.632014  
C -3.138698 1.174080 0.239335  
C -4.422757 1.254882 -0.326054  
C -2.825957 1.974095 1.351534  
C -5.373183 2.124153 0.215310  
H -4.684850 0.633301 -1.185327  
C -3.777053 2.845935 1.887444  
H -1.833725 1.920295 1.806857  
C -5.052759 2.920261 1.320155  
H -6.370302 2.179580 -0.228189

H -3.523488 3.462208 2.753422  
H -5.799959 3.596919 1.741888  
C 1.772211 -0.854424 2.387390  
C 2.609743 -1.835514 3.193166  
C 2.537956 -3.314497 2.764345  
C 2.413100 -3.617835 1.258642  
C 0.979729 -3.624777 0.673600  
C 0.484201 -2.366986 -0.038840  
H 2.190066 -0.850877 1.362049  
H 1.861045 0.172741 2.784482  
H 3.659564 -1.497519 3.106867  
H 2.369766 -1.758792 4.268105  
H 3.445496 -3.805918 3.151643  
H 1.703917 -3.820442 3.281264  
H 2.834854 -4.623564 1.102042  
H 3.057962 -2.939150 0.670844  
H 0.930447 -4.443420 -0.070275  
H 0.263100 -3.925232 1.459849  
H 1.204119 -2.075158 -0.825777  
H -0.482557 -2.574244 -0.527356  
C -1.353346 -1.298091 2.461601  
C -0.189961 -1.476007 3.228539  
H -1.825745 -2.172530 2.002379  
H -2.017377 -0.452380 2.670669  
H 0.033981 -0.785305 4.046139  
H 0.189510 -2.485920 3.375780

\*TS9-10A-08

Geometry with 77 atoms:

Total energy: -3045.575196300  
Cr 0.077805 -0.284702 1.278761  
P 1.567734 -0.278313 -0.687002  
P -1.707055 -0.117056 -0.650181  
C -0.737636 -0.041236 -2.238794  
C 0.562947 -0.847642 -2.152052  
H -1.361235 -0.354172 -3.090207  
H -0.514994 1.026780 -2.392253  
H 0.357577 -1.920294 -2.014548  
H 1.157288 -0.742047 -3.072608  
C 3.003380 -1.409057 -0.608976  
C 2.797820 -2.798357 -0.690073  
C 4.295651 -0.920035 -0.352414  
C 3.871367 -3.678972 -0.539467  
H 1.799067 -3.205216 -0.862773  
C 5.364805 -1.806751 -0.197428  
H 4.474415 0.154419 -0.276039  
C 5.156821 -3.185551 -0.293655  
H 3.700988 -4.755952 -0.611193  
H 6.365927 -1.414966 -0.001800  
H 5.994949 -3.876396 -0.174607  
C 2.214370 1.345263 -1.247947  
C 2.979986 1.454737 -2.423512  
C 1.906648 2.506320 -0.521656  
C 3.421162 2.704799 -2.860710  
H 3.242048 0.560573 -2.994842  
C 2.348047 3.758147 -0.962055  
H 1.332531 2.436762 0.403078  
C 3.104243 3.858042 -2.132266  
H 4.017350 2.780465 -3.773261  
H 2.104119 4.653826 -0.385560  
H 3.452321 4.834620 -2.477497  
C -2.782629 -1.596196 -0.765126  
C -3.727511 -1.818752 0.256312  
C -2.632854 -2.566498 -1.770208  
C -4.512077 -2.973189 0.260547  
H -3.865112 -1.079129 1.048796  
C -3.413078 -3.727618 -1.755959  
H -1.912156 -2.432746 -2.578699  
C -4.353760 -3.933875 -0.744415  
H -5.248981 -3.123981 1.053185  
H -3.285641 -4.471449 -2.546332  
H -4.963828 -4.840211 -0.738650  
C -2.800569 1.353597 -0.734127  
C -4.181027 1.296016 -0.981540  
C -2.191374 2.605472 -0.523733  
C -4.937018 2.472511 -1.012297  
H -4.671962 0.336208 -1.153059  
C -2.948033 3.777582 -0.566150  
H -1.115070 2.668062 -0.339000  
C -4.325441 3.712050 -0.805097  
H -6.011109 2.417697 -1.206113

H -2.462684 4.743952 -0.408699  
H -4.920621 4.628044 -0.830953  
C -1.485835 -0.054643 2.824787  
C -0.890812 1.349749 2.676706  
C 0.034651 1.863869 3.801205  
C 1.409761 2.320609 3.295514  
C 2.366310 1.173384 2.873837  
C 1.719453 -0.182662 2.554329  
H -2.480140 -0.109787 2.369092  
H -1.560512 -0.303595 3.887450  
H -0.360375 1.531255 1.685733  
H -1.737268 2.037118 2.511526  
H -0.466030 2.708433 4.300085  
H 0.157515 1.085513 4.570549  
H 1.894767 2.930047 4.074244  
H 1.245580 3.015107 2.450524  
H 2.970126 1.512451 2.014659  
H 3.095948 1.020955 3.691464  
H 2.490496 -0.871814 2.170510  
H 1.343042 -0.641131 3.487322  
C -0.074507 -2.354077 1.396925  
C -0.894716 -2.028887 2.519861  
H 0.932520 -2.734251 1.593751  
H -0.570232 -2.773751 0.514067  
H -1.955719 -2.288289 2.475916  
H -0.453682 -2.148626 3.512033

\*TS9-10A-09

Geometry with 77 atoms:

Total energy: -3045.577760610  
Cr 0.126428 -0.248410 1.290889  
P 1.563367 -0.259655 -0.725725  
P -1.726437 -0.102185 -0.626159  
C -0.779993 -0.020509 -2.228437  
C 0.527056 -0.820123 -2.171394  
H -1.417312 -0.334039 -3.069733  
H -0.566053 1.049870 -2.380319  
H 0.332974 -1.895310 -2.039045  
H 1.102901 -0.703397 -3.102460  
C 2.988035 -1.404906 -0.668992  
C 2.765303 -2.792368 -0.737685  
C 4.288919 -0.929448 -0.430793  
C 3.830397 -3.684427 -0.594800  
H 1.759701 -3.189187 -0.893560  
C 5.349651 -1.827612 -0.284112  
H 4.480753 0.143168 -0.360505  
C 5.124577 -3.204458 -0.368933  
H 3.646540 -4.755923 -0.656371  
H 6.357601 -1.446379 -0.103277  
H 5.956087 -3.904262 -0.255901  
C 2.208532 1.360694 -1.291660  
C 2.981248 1.470588 -2.462292  
C 1.885785 2.521668 -0.572027  
C 3.416955 2.722378 -2.900042  
H 3.252695 0.575982 -3.028458  
C 2.320908 3.775112 -1.013345  
H 1.301026 2.447844 0.346467  
C 3.086296 3.875643 -2.177687  
H 4.019277 2.799503 -3.808438  
H 2.065266 4.671440 -0.443070  
H 3.430239 4.853419 -2.523671  
C -2.759693 -1.613869 -0.711525  
C -3.687606 -1.842259 0.323711  
C -2.603487 -2.592025 -1.707636  
C -4.446041 -3.013451 0.353485  
H -3.834649 -1.092693 1.105048  
C -3.357837 -3.769842 -1.668354  
H -1.899537 -2.450237 -2.529398  
C -4.279162 -3.983995 -0.640839  
H -5.170094 -3.169464 1.156903  
H -3.225983 -4.520122 -2.451888  
H -4.868844 -4.903390 -0.615197  
C -2.881180 1.319098 -0.732873  
C -4.220021 1.199880 -1.139292  
C -2.373333 2.589151 -0.401669  
C -5.034621 2.334056 -1.209910  
H -4.631332 0.222696 -1.400526  
C -3.187957 3.720433 -0.482548  
H -1.332515 2.699665 -0.085437  
C -4.522384 3.593241 -0.882814  
H -6.075415 2.232121 -1.527020

H -2.781752 4.702372 -0.227721  
H -5.163294 4.476479 -0.939030  
C -1.419660 0.003719 2.900906  
C -0.821562 1.410228 2.788669  
C 0.157467 1.867043 3.891447  
C 1.507046 2.350221 3.342067  
C 2.449492 1.229253 2.822325  
H 1.809519 -0.134243 2.520090  
H -2.409636 -0.042847 2.432858  
H -1.504773 -0.269247 3.957021  
H -0.335344 1.627755 1.784675  
H -1.672384 2.106949 2.697102  
H -0.315616 2.685110 4.456959  
H 0.317785 1.050708 4.613088  
H 2.026952 2.923022 4.126142  
H 1.303504 3.085039 2.541042  
H 2.981791 1.597509 1.928839  
H 3.240742 1.072702 3.579571  
H 2.576273 -0.811571 2.107422  
H 1.469161 -0.602335 3.461888  
C -0.034386 -2.326556 1.452593  
C -0.820977 -2.005298 2.597795  
H 0.982598 -2.697180 1.615194  
H -0.555008 -2.745035 0.583495  
H -1.885083 -2.254851 2.584576  
H -0.351186 -2.104662 3.579085

\*TS9-10A-10

Geometry with 77 atoms:

Total energy: -3045.570506900  
Cr 0.007158 -0.907747 -0.993209  
P -1.704892 0.453555 0.547702  
P 1.564327 0.435054 0.534254  
C 0.599216 1.229936 1.934326  
C -0.775788 0.586961 2.158062  
H 1.199379 1.199774 2.856073  
H 0.482068 2.289331 1.659807  
H -0.674716 -0.439563 2.547414  
H -1.360690 1.166024 2.890191  
C -3.325056 -0.287923 0.953988  
C -3.600160 -0.913074 2.180727  
C -4.306059 -0.303744 -0.057198  
C -4.833292 -1.541032 2.390336  
H -2.864891 -0.914002 2.987482  
C -5.536867 -0.923833 0.159353  
H -4.110511 0.184238 -1.016612  
C -5.801764 -1.548359 1.384020  
H -5.037008 2.021977 3.350243  
H -6.292337 -0.921214 -0.630234  
H -6.764166 -2.037408 1.552851  
C -2.063384 2.209176 0.133568  
C -3.211666 2.869291 0.606659  
C -1.128210 2.929253 -0.631952  
C -3.414567 4.220986 0.317508  
H -3.952519 2.329649 1.200651  
C -1.329572 4.284125 -0.909475  
H -0.228902 2.439095 -1.008280  
C -2.475118 4.931189 -0.438035  
H -4.311341 4.723587 0.688308  
H -0.589157 4.830130 -1.499100  
H -2.637842 5.988826 -0.659565  
C 2.785187 -0.655639 1.365208  
C 4.063695 -0.832594 0.809408  
C 2.416253 -1.413638 2.490150  
C 4.954071 -1.751904 1.370244  
H 4.372339 -0.247498 -0.059728  
C 3.310843 -2.330104 3.048534  
H 1.428368 -1.300030 2.942607  
C 4.579880 -2.504508 2.847730  
H 5.946862 -1.877868 0.931468  
H 3.014324 -2.910306 3.925791  
H 5.277940 -3.223144 2.923700  
C 2.557827 1.805642 -0.158675  
C 3.300543 2.647458 0.689034  
C 2.570224 2.031877 -1.543442  
C 4.033188 3.707736 0.153847  
H 3.311561 2.472339 1.768003  
C 3.307809 3.094788 -2.075763  
H 2.004400 1.376296 -2.207184  
C 4.035818 3.933680 -1.228241  
H 4.607409 4.359737 0.816580

H 3.313131 3.265232 -3.154996  
H 4.611301 4.746420 -1.643577  
C -1.518236 -2.435573 -1.227871  
C -1.449731 -3.811249 -1.874090  
C -0.075607 -4.340060 -2.306246  
C 1.027312 -4.417797 -1.239932  
C 1.569778 -3.089425 -0.664005  
C 1.665153 -1.926266 -1.653797  
H -1.105018 -2.484356 -0.190681  
H -2.557645 -2.108875 -1.108248  
H -1.895315 -4.526398 -1.155034  
H -2.123336 -3.828026 -2.748737  
H -0.226456 -5.356797 -2.705886  
H 0.289921 -3.749237 -3.162328  
H 1.880584 -4.943909 -1.701506  
H 0.691253 -5.063216 -0.408960  
H 0.949706 -2.791226 0.220585  
H 2.546560 -3.279480 -0.187955  
H 2.605854 -1.364430 -1.556919  
H 1.570552 -2.233970 -2.705337  
C -0.389050 0.043645 -2.862818  
C -1.211234 -1.080339 -3.017419  
H 0.582322 0.062284 -3.364905  
H -0.850601 1.013890 -2.654616  
H -2.296743 -0.968776 -2.979476  
H -0.858564 -1.928654 -3.606673

<sup>4</sup>TS9-10A-11

Geometry with 77 atoms:

Total energy: -3045.569853210  
Cr 0.010780 -0.813797 1.158750  
P 1.734935 0.358113 -0.522314  
P -1.560085 0.365029 -0.506876  
C -0.575790 1.005661 -1.972933  
C 0.789956 0.325739 -2.127810  
H -1.173311 0.888172 -2.889143  
H -0.445330 2.085740 -1.806567  
H 0.670639 -0.736031 -2.401992  
H 1.374865 0.812392 -2.924353  
C 3.314576 -0.499248 -0.856062  
C 3.586536 -1.179564 -2.054361  
C 4.267935 -0.532384 0.180359  
C 4.788616 -1.879228 -2.209814  
H 2.874035 -1.169043 -2.881123  
C 5.469187 -1.222609 0.017167  
H 4.074415 -0.001981 1.117138  
C 5.730153 -1.902513 -1.178499  
H 4.989872 -2.403346 -3.147384  
H 6.203915 -1.232875 0.825994  
H 6.668645 -2.447427 -1.305409  
C 2.161039 2.132062 -0.311135  
C 3.366513 2.680962 -0.781649  
C 1.222485 2.972691 0.315422  
C 3.624030 4.045378 -0.624307  
H 4.108116 2.044531 -1.269342  
C 1.479836 4.338331 0.460641  
H 0.279063 2.567038 0.686255  
C 2.683503 4.875702 -0.005109  
H 4.565463 4.462552 -0.990301  
H 0.738711 4.979387 0.944091  
H 2.890601 5.941850 0.115545  
C -2.847487 -0.707901 -1.250669  
C -4.168219 -0.683805 -0.773119  
C -2.489752 -1.638517 -2.241475  
C -5.114398 -1.577147 -1.282653  
H -4.463085 0.031769 -0.002812  
C -3.440014 -2.527700 -2.748590  
H -1.466655 -1.679751 -2.624686  
C -4.753287 -2.501140 -2.267764  
H -6.139952 -1.548832 -0.906732  
H -3.153039 -3.244736 -3.521476  
H -5.495180 -3.198994 -2.663208  
C -2.464107 1.840219 0.096275  
C -3.107396 2.706706 -0.806728  
C -2.508213 2.120310 1.470744  
C -3.771689 3.840480 -0.336346  
H -3.096471 2.496521 -1.879202  
C -3.177551 3.256142 1.938224  
H -2.020289 1.450553 2.179057  
C -3.806103 4.117702 1.035849  
H -4.267306 4.510459 -1.043071

H -3.206473 3.465530 3.010231  
H -4.327658 5.006248 1.400039  
C 1.471793 -2.353531 1.612449  
C 0.899831 -3.641473 2.201697  
C 0.058773 -4.462632 1.204324  
C -1.039366 -3.710386 0.443975  
C -2.101852 -2.995306 1.294983  
C -1.608620 -1.754356 2.057949  
H 1.378579 -2.326720 0.501182  
H 2.546596 -2.243657 1.790083  
H 1.729084 -4.276722 2.557423  
H 0.300466 -3.426123 3.101097  
H 0.740236 -4.919133 0.464513  
H -0.403925 -5.302350 1.750937  
H -1.538272 -4.424689 -0.232562  
H -0.579926 -2.965792 -0.243470  
H -2.916319 -2.698615 0.617796  
H -2.547360 -3.731175 1.991783  
H -2.435903 -1.038332 2.208567  
H -1.239398 -2.015119 3.064520  
C 0.413496 0.365702 2.899476  
C 1.336355 -0.656872 3.135890  
H -0.531289 0.369287 3.450178  
H 0.773694 1.332451 2.535064  
H 2.399553 -0.466261 2.974406  
H 1.114486 -1.447648 3.856358

<sup>4</sup>TS9-10A-12

Geometry with 77 atoms:

Total energy: -3045.574473370  
Cr -0.143696 -0.116207 1.390110  
P 1.732667 0.446793 -0.522479  
P -1.583717 0.528566 -0.596793  
C -0.536427 1.475536 -1.807468  
C 0.772861 0.732668 -2.099878  
H -1.103013 1.675268 -2.730073  
H -0.351419 2.457657 -1.344411  
H 0.554318 -0.245038 -2.551977  
H 1.400061 1.291762 -2.810666  
C 2.866153 -0.959721 -0.836143  
C 2.621819 -1.925078 -1.828113  
C 3.937430 -1.165242 0.056978  
C 3.430308 -3.062196 -1.926166  
H 1.799780 -1.807276 -2.536321  
C 4.744804 -2.299270 -0.047190  
H 4.155057 -0.427402 0.833496  
C 4.491253 -3.254229 -1.037598  
H 3.228044 3.799970 -2.706446  
H 5.575132 -2.436915 0.649756  
H 5.121120 -4.143381 -1.117329  
C 2.781363 1.958943 -0.453271  
C 4.116293 1.988354 -0.893464  
C 2.185001 3.155816 -0.013547  
C 4.838406 3.184944 -0.876138  
H 4.600172 1.081264 -1.259374  
C 2.907364 4.351922 -0.008436  
H 1.145876 3.163080 0.320583  
C 4.238890 4.367743 -0.432848  
H 5.875969 3.191641 -1.219109  
H 2.427342 5.272114 0.333458  
H 4.807646 5.300633 -0.421416  
C -2.183284 -0.925633 -1.552754  
C -2.771399 -1.991165 -0.846903  
C -2.079913 -1.017344 -2.952347  
C -3.240327 -3.120444 -1.521021  
H -2.873439 -1.937798 0.236917  
C -2.544323 -2.152623 -3.624072  
H -1.641605 -0.208236 -3.538424  
C -3.123586 -3.206383 -2.911848  
H -3.697944 -3.935698 -0.955356  
H -2.455044 -2.209218 -4.711693  
H -3.485696 -4.091690 -3.440116  
C -3.044152 1.595244 -0.325315  
C -4.218857 1.468772 -1.084337  
C -2.963442 2.582827 0.671927  
C -5.295145 2.329353 -0.851599  
H -4.298634 0.697431 -1.853793  
C -4.039309 3.444952 0.894297  
H -2.059890 2.673363 1.280296  
C -5.206572 3.317830 0.133801  
H -6.208281 2.225446 -1.442756

H -3.970466 4.211285 1.670295  
H -6.051349 3.987104 0.314023  
C 1.294001 -1.369525 2.492730  
C 0.630230 -2.407879 1.563374  
C -0.149947 -3.531872 2.263039  
C -1.585241 -3.204783 2.696222  
C -1.779789 -1.874022 3.438820  
C -1.823077 -0.630430 2.541153  
H 2.310943 -1.150318 2.152836  
H 1.337561 -1.780104 3.505613  
H -0.044625 -1.999889 0.747201  
H 1.442150 -2.828253 0.948446  
H -0.177342 -4.401184 1.585229  
H 0.438593 -3.850808 3.140436  
H -1.936787 -4.035492 3.330299  
H -2.242911 -3.213731 1.809145  
H -2.733111 -1.936599 3.997247  
H -1.001418 -1.773110 4.217367  
H -2.694289 -0.705050 1.866287  
H -2.014208 0.264996 3.157389  
C 0.344876 1.499872 2.617140  
C 0.925536 0.456878 3.401184  
H -0.595826 1.937545 2.963569  
H 1.032588 2.194392 2.129536  
H 2.002086 0.488993 3.587718  
H 0.346509 0.078865 4.247318

<sup>4</sup>TS9-10A-13

Geometry with 77 atoms:

Total energy: -3045.570498070  
Cr 0.002418 -0.769952 1.223562  
P 1.774512 0.233054 -0.474867  
P -1.507369 0.366310 -0.488289  
C -0.487043 0.205662 -1.967628  
C 0.849935 0.180077 -2.090142  
H -1.083968 0.799517 -2.883649  
H -0.312903 1.999034 -1.833981  
H 0.687720 -0.882666 -2.334389  
H 1.463159 0.618399 -2.893353  
C 3.327530 -0.692361 -0.753324  
C 3.556398 -1.489559 -1.887280  
C 4.301521 -0.656970 0.264629  
C 4.735836 -2.234721 -1.998983  
H 2.827779 -1.534143 -2.698786  
C 5.478859 -1.396182 0.145268  
H 4.143988 -0.035230 1.150794  
C 5.697289 -2.190201 -0.986694  
H 4.904334 -2.847226 -2.888108  
H 6.229176 -1.353235 0.938546  
H 6.618325 -2.770583 -1.079240  
C 2.271241 1.998956 -0.343831  
C 3.494365 2.471581 -0.851729  
C 3.807215 3.831368 -0.778555  
H 4.207765 1.779156 -1.303559  
C 1.684197 4.273801 0.295383  
H 0.415235 2.571039 0.635047  
C 2.904355 4.734457 -0.207342  
H 4.761850 4.187272 -1.173839  
H 0.972230 4.971681 0.742548  
H 3.153341 5.797071 -0.152953  
C -2.817206 -0.689682 -1.224978  
C -4.152408 -0.582773 -0.802538  
C -2.474117 -1.665211 -2.177453  
C -5.125844 -1.437509 -1.326862  
H -4.437114 0.167890 -0.062433  
C -3.451179 -2.515962 -2.699936  
H -1.441735 -1.769816 -2.522092  
C -4.778503 -2.405889 -2.273426  
H -6.161773 -1.344360 -0.992050  
H -3.173887 -3.268342 -3.442184  
H -5.541731 -3.073068 -2.681042  
C -2.380632 1.889256 0.038631  
C -2.964005 2.747944 -0.911525  
C -2.469198 2.208827 1.402291  
C -3.614491 3.911596 -0.498227  
H -2.917953 2.509131 -1.977053  
C -3.125777 3.374041 1.812260  
H -2.025068 1.547539 2.146268  
C -3.695542 4.226705 0.863720  
H -4.063612 4.574597 -1.241704



H -3.190170 3.613366 2.876462  
H -4.207346 5.137675 1.183719  
C 1.490134 -2.256563 1.956098  
C 0.728783 -3.003373 0.861256  
C -0.272876 -4.097397 1.292641  
C -1.704445 -3.823897 0.815623  
C -2.462590 -2.755098 1.629388  
C -1.641151 -1.587885 2.206256  
H 2.501658 -2.000837 1.627106  
H 1.541144 -2.882526 2.851621  
H 0.177639 -2.332674 0.124358  
H 1.488320 -3.404713 0.169146  
H 0.072459 -5.059457 0.882970  
H -0.257119 -4.206236 2.389564  
H -2.283537 -4.761418 0.833317  
H -1.664221 -3.525998 -0.247669  
H -3.276723 -2.367687 0.999513  
H -2.965109 -3.265867 2.473072  
H -2.321048 -0.756209 2.460441  
H -1.180605 -1.899794 3.161190  
C 0.460588 0.486173 2.826665  
C 1.225651 -0.638617 3.249104  
H -0.467653 0.694692 3.366961  
H 0.999832 1.366902 2.464634  
H 2.315023 -0.551188 3.273208  
H 0.819700 -1.245955 4.061115

\*T9-10A-14

Geometry with 77 atoms:

Total energy: -3045.573506640  
Cr -0.013789 -0.747576 1.230652  
P 1.784666 0.222925 -0.484179  
P -1.499420 0.381962 -0.501568  
C -0.470028 0.944833 -1.971218  
C 0.860772 0.194168 -2.100291  
H -1.066408 0.839140 -2.889587  
H -0.287957 2.020177 -1.823704  
H 0.688584 -0.864683 -2.354074  
H 1.477897 0.634492 -2.899378  
C 3.325196 -0.721991 -0.764542  
C 3.550393 -1.507872 -1.907078  
C 4.291561 -0.715257 0.261262  
C 4.719219 -2.269327 -2.019934  
H 2.827128 -1.530824 -2.724258  
C 5.458600 -1.470437 0.140642  
H 4.137040 -0.103194 1.154744  
C 5.673626 -2.252673 -1.000177  
H 4.885060 -2.872693 -2.915798  
H 6.203529 -1.449198 0.939857  
H 6.586473 -2.845691 -1.093691  
C 2.303570 1.980913 -0.339313  
C 3.536015 2.440897 -0.835822  
C 1.411113 2.902988 0.238707  
C 3.865555 3.796191 -0.752319  
H 4.243352 1.741944 -1.287211  
C 1.741005 4.259008 0.310046  
H 0.448725 2.570098 0.631758  
C 2.970267 4.707202 -0.181842  
H 4.827225 4.142403 -1.139081  
H 1.035031 4.963227 0.756796  
H 3.232200 5.766255 -0.119418  
C -2.790497 -0.686090 -1.253489  
C -4.136859 -0.576621 -0.869257  
C -2.419667 -1.674893 -2.181872  
C -5.093927 -1.441017 -1.407940  
H -4.443244 0.183399 -0.147778  
C -3.380260 -2.534984 -2.719103  
H -1.377826 -1.782953 -2.495067  
C -4.719102 -2.421677 -2.331003  
H -6.138754 -1.345717 -1.102675  
H -3.081002 -3.297685 -3.442001  
H -5.469619 -3.096419 -2.749615  
C -2.380590 1.900808 0.020842  
C -2.994517 2.737345 -0.929774  
C -2.434732 2.245362 1.380306  
C -3.644567 3.902853 -0.521183  
H -2.971261 2.478434 -1.991401  
C -3.090036 3.412950 1.785450  
H -1.964874 1.601879 2.124396  
C -3.692783 4.242310 0.836543  
H -4.118356 4.548457 -1.264652

H -3.128261 3.672114 2.846243  
H -4.204428 5.154580 1.153099  
C 1.446058 -2.294922 1.953581  
C 0.639778 -3.050947 0.894415  
C -0.410282 -4.076177 1.379738  
C -1.836571 -3.754677 0.912793  
C -2.545118 -2.637110 1.707026  
C -1.672414 -1.492669 2.250925  
H 2.450585 -2.058251 1.589010  
H 1.518316 -2.909070 2.856060  
H 0.125840 -2.388208 0.126901  
H 1.380340 -3.523293 0.226436  
H -0.119349 -5.068536 1.001156  
H -0.381674 -4.146675 2.479598  
H -2.452057 -4.667651 0.960426  
H -1.796438 -3.485609 -0.157861  
H -3.347349 -2.230993 1.073383  
H -3.061799 -3.106987 2.565819  
H -2.317352 -0.634086 2.507397  
H -1.205006 -1.810463 3.200623  
C 0.517582 0.492322 2.833857  
C 1.245890 -0.657097 3.257819  
H -0.397151 0.738916 3.381518  
H 1.086496 1.351481 2.464492  
H 2.338206 -0.612100 3.268256  
H 0.824894 -1.249809 4.073060

\*T9-10A-15

Geometry with 77 atoms:

Total energy: -3045.568112850  
Cr 0.028006 -0.973541 -0.793345  
P -1.670177 0.585032 0.583941  
P 1.602852 4.702884 0.633127  
C 0.641785 1.500227 1.868817  
C -0.751580 0.931059 2.169079  
H 1.230813 1.610084 2.792237  
H 0.556236 2.503818 1.424342  
H -0.679281 -0.026564 2.709907  
H -1.328013 1.627105 2.798838  
C -3.280145 -0.134474 1.066100  
C -3.576622 -0.570970 2.367499  
C -4.225596 -0.344167 0.042732  
C -4.795068 -1.204367 2.637406  
H 2.869219 -0.419651 3.184794  
C -5.441928 -0.969715 0.317960  
H -4.015743 -0.001298 -0.974655  
C -5.727869 -1.405348 1.617291  
H 5.015239 -1.537353 3.654635  
H -6.169423 -1.118309 -0.483722  
H -6.678238 -1.899419 1.833065  
C -2.056043 2.272037 -0.038320  
C -3.247138 2.939553 0.297777  
C -1.100508 2.935896 -0.829413  
C -3.472315 4.244016 -0.149260  
H -4.003746 2.441764 0.908187  
C -1.325340 4.244385 -1.265646  
H -0.169301 2.438435 -1.106579  
C -2.513029 4.899646 -0.928409  
H -4.402449 4.752519 0.116444  
H -0.570184 4.747924 -1.874072  
H -2.692847 5.920567 -1.273912  
C 2.733294 -0.566777 1.636902  
C 3.977657 -0.950863 1.105538  
C 2.330612 -1.083294 2.881233  
C 4.806359 -1.823636 1.814141  
H 4.305365 -0.562112 0.139065  
C 3.163716 -1.958142 3.584626  
H 1.369304 -0.807929 3.321040  
C 4.401967 -2.330319 3.053366  
H 5.774409 -2.107980 1.394549  
H 2.843063 -2.347310 4.554129  
H 5.052416 -3.013101 3.605257  
C 2.679556 1.678127 -0.220794  
C 3.623749 2.439050 0.491761  
C 2.528683 1.878512 -1.602279  
C 4.396178 3.392950 -0.172771  
H 3.762721 2.279665 1.564197  
C 3.304131 2.836159 -2.263844  
H 1.805045 1.283040 -2.162469  
C 4.235899 3.593748 -1.549419  
H 5.129088 3.981613 0.384358

H 3.181908 2.985962 -3.339229  
H 4.843793 4.341079 -2.065293  
C -1.283131 -2.628465 -0.734891  
C -1.567958 -3.966058 -1.392380  
C -0.561793 -4.537590 -2.406506  
C 0.938332 -4.405186 -2.095331  
C 1.618635 -3.084163 -2.519033  
C 1.699997 -1.974899 -1.468233  
H -0.438958 -2.751435 0.001030  
H -2.170969 -2.278193 -0.190264  
H -1.683603 -4.693253 -0.565136  
H -2.563695 -3.922130 -1.866651  
H -0.808449 -5.605971 -2.521570  
H -0.742712 -4.101583 -3.404854  
H 1.446622 -5.224715 -2.628887  
H 1.126685 -4.596417 -1.022345  
H 2.652797 -3.331811 -2.825482  
H 1.137295 -2.709751 -3.442471  
H 2.150446 -2.379763 -0.539809  
H 2.392043 -1.186205 -1.819835  
C -0.569662 -0.204308 -2.711194  
C -1.432358 -1.297754 -2.620066  
H 0.318765 -0.279077 -3.345696  
H -0.949230 0.802641 -2.516158  
H -2.477949 -1.155929 -2.335227  
H -1.226634 -2.192925 -3.204107

\*T9-10A-16

Geometry with 77 atoms:

Total energy: -3045.572712970  
Cr -0.068289 -0.911938 1.017268  
P 1.766580 0.332404 -0.510388  
P -1.498332 0.446128 -0.609272  
C -0.454869 1.196398 -1.973983  
C 0.898080 0.496059 -2.150196  
H -1.026778 1.187467 -2.914002  
H -0.304291 2.550969 -1.698061  
H 0.766592 -0.526488 -2.540438  
H 1.530729 1.047562 -2.863475  
C 3.362811 -0.487133 -0.867630  
C 3.653012 -1.106822 -2.094369  
C 4.307345 -0.562972 0.175687  
C 4.864035 -1.785186 -2.272650  
H 2.947315 -1.063095 -2.925996  
C 5.517057 -1.232882 -0.009936  
H 4.102929 -0.080647 1.136128  
C 5.796862 -1.849435 -1.235022  
H 5.079584 -2.259827 -3.231111  
H 6.244354 -1.274495 0.804596  
H 6.742878 -2.376553 -1.380029  
C 2.198391 2.075189 -0.103959  
C 3.407016 2.665665 -0.514294  
C 1.258894 2.858514 0.591603  
C 3.666153 4.008986 -0.230031  
H 4.152381 2.079607 -1.056083  
C 1.517167 4.204617 0.863723  
C 0.312397 2.425733 0.918386  
C 2.723570 4.817254 0.457161  
H 4.610362 4.455756 -0.551255  
H 0.772495 4.799029 1.398714  
H 2.930686 5.831700 0.675780  
C -2.714288 -0.613981 -1.486775  
C -4.023232 -0.744993 -0.991428  
C -2.319552 -1.387939 -2.592459  
C -4.920244 -1.627642 -1.598340  
H -4.348151 -0.153426 -0.132915  
C -3.220795 -2.269870 -3.195151  
H -1.308816 -1.309283 -2.999555  
C -4.522183 -2.392679 -2.698957  
H -5.937071 -1.715914 -1.208098  
H -2.904719 -2.860153 -4.058820  
H -5.226128 -3.081938 -3.171369  
C -2.474710 1.856596 0.028278  
C -3.223988 2.659336 -0.851055  
C -2.458855 2.159929 1.398553  
C -3.937897 3.754252 -0.362134  
H -3.254770 2.426450 -1.918591  
C -3.177588 3.257378 1.884354  
H -1.884687 1.539657 2.087964  
C -3.914737 4.054833 1.005420  
H -4.517510 4.375038 -1.049673

H -3.161656 3.485936 2.952697  
H -4.476548 4.911985 1.384705  
C 1.383141 -2.524187 1.464315  
C 0.461726 -3.217396 0.468776  
C -0.506744 -4.267572 1.058300  
C -0.963085 -4.039057 2.508352  
C -1.857801 -2.802879 2.783307  
C -1.862403 -1.707925 1.712974  
H 2.311334 -2.170666 1.002954  
H 1.632062 -3.202196 2.283369  
H -0.119794 -2.498641 -0.189017  
H 1.098257 -3.674499 -0.309766  
H -1.381046 -4.361017 0.393412  
H 0.007927 -5.241986 1.020533  
H -0.068571 -4.002403 3.150832  
H -1.497564 -4.946994 2.830701  
H -2.899661 -3.151324 2.916693  
H -1.579812 -2.371452 3.760541  
H -2.343100 -2.099209 0.798588  
H -2.492466 -0.865947 2.051969  
C 0.384935 0.083442 2.810588  
C 1.122596 -1.099538 3.061757  
H -0.566129 0.214549 3.335683  
H 0.937437 1.001305 2.586063  
H 2.214719 -1.049030 3.079151  
H 0.701124 -1.841181 3.742588

\*TS9-10A-17

Geometry with 77 atoms:

Total energy: -3045.572732220  
Cr -0.080362 -0.897613 1.017615  
P 1.764267 0.329371 -0.509852  
P -1.492684 0.457720 -0.618173  
C -0.448457 1.187154 -1.995310  
C 0.909135 0.492231 -2.156695  
H -1.018023 1.154172 -2.936105  
H -0.304494 2.247733 -1.738810  
H 0.785007 -0.527889 -2.554911  
H 1.546816 1.048246 -2.861979  
C 3.360945 -0.495191 -0.854423  
C 3.660222 -1.114283 -2.079318  
C 4.296364 -0.574600 0.196823  
C 4.870702 -1.796151 -2.247750  
H 2.962186 -1.067611 -2.917261  
C 5.505584 -1.248067 0.021083  
H 4.085510 -0.092104 1.155778  
C 5.794159 -1.864444 -1.202057  
H 5.093190 -2.270380 -3.206828  
H 6.225673 -1.292623 0.841836  
H 6.739726 -2.394432 -1.339280  
C 2.198572 2.072047 -0.104923  
C 3.411570 2.657140 -0.510126  
C 1.258885 2.859972 0.585191  
C 3.674862 3.999743 -0.226411  
H 4.157390 2.067161 -1.047052  
C 1.521547 4.205356 0.856884  
H 0.309161 2.431645 0.908836  
C 2.732177 4.776635 0.455381  
H 4.622541 4.442130 -0.543465  
H 0.776992 4.803458 1.387896  
H 2.942589 5.826439 0.673935  
C -2.697345 -0.626865 -1.480050  
C -4.047240 -0.658743 -1.093512  
C -2.241693 -1.530446 -2.457360  
C -4.925903 -1.570979 -1.684996  
H -4.418830 0.029206 -0.331323  
C -3.124231 -2.439356 -3.045721  
H -1.194499 -1.533124 -2.769304  
C -4.468643 -2.462049 -2.660063  
H -5.975075 -1.583430 -1.379944  
H -2.759961 -3.131832 -3.808564  
H -5.158564 -3.173783 -3.119631  
C -2.467544 1.875818 0.000249  
C -3.179215 2.698594 -0.891849  
C -2.487446 2.165248 1.373622  
C -3.892101 3.798382 -0.412216  
H -3.181562 2.478470 -1.962436  
C -3.204929 3.267472 1.849945  
H -1.941170 1.530588 2.072616  
C -3.904981 4.084393 0.958516  
H -4.441819 4.434789 -1.109945

H -3.216223 3.485404 2.920558  
H -4.465099 4.945894 1.330376  
C 1.358160 -2.516810 1.481375  
C 0.443675 -3.207140 0.477040  
C -0.537343 -4.251060 1.056847  
C -1.005960 -4.020106 2.502560  
C -1.896544 -2.778961 2.769018  
C -1.886129 -1.684863 1.697920  
H 2.293567 -2.169900 1.029542  
H 1.594513 -3.194829 2.304139  
H -0.126887 -2.486863 -0.188687  
H 1.086469 -3.668876 -0.293587  
H -1.405817 -4.337852 0.383450  
H -0.029130 -5.229009 1.023428  
H -0.117364 -3.988245 3.153440  
H -1.548432 -4.925100 2.819785  
H -2.941357 -3.121813 2.893289  
H -1.624833 -2.348637 3.748556  
H -2.361480 -2.074516 0.779945  
H -2.516403 -0.840277 2.030308  
C 0.363882 0.100450 2.810652  
C 1.089991 -1.087361 3.073195  
H -0.591002 0.240988 3.326318  
H 0.925485 1.013216 2.587794  
H 2.182214 -1.045017 3.102507  
H 0.655564 -1.824063 3.751287

\*TS9-10A-18

Geometry with 77 atoms:

Total energy: -3045.569356880  
Cr 0.075681 -0.803043 1.123205  
P 1.658360 0.532553 -0.559318  
P -1.637000 0.336768 -0.477040  
C -0.721237 1.124268 -1.913292  
C 0.679785 0.543124 -2.143977  
H -1.332855 1.046129 -2.824923  
H -0.650744 2.195192 -1.669120  
H 0.624077 -0.504321 -2.482924  
H 1.213627 1.117816 -2.917592  
C 3.289068 -0.182782 -0.969355  
C 3.569717 -0.819286 -2.189382  
C 4.279227 -0.155524 0.032183  
C 4.817304 -1.417083 -2.400625  
H 2.827860 -0.852654 -2.989397  
C 5.524839 -0.744159 -0.186744  
H 4.078340 0.344143 0.984118  
C 5.795028 -1.381018 -1.403797  
H 5.025329 -1.907688 -3.354688  
H 6.287269 -0.708474 0.595275  
H 6.768899 -1.846270 -1.574191  
C 1.964730 2.317633 -0.238687  
C 3.113681 2.980904 -0.703967  
C 0.990640 3.049859 0.465368  
C 3.280289 4.347977 -0.466653  
H 3.883937 2.432280 -1.250200  
C 1.155879 4.418949 0.690114  
H 0.089322 2.555957 0.833880  
C 2.303745 5.069427 0.228131  
H 4.178601 4.853101 -0.830203  
H 0.386310 4.974198 1.231898  
H 2.438731 6.138401 0.410327  
C -2.756062 -0.980046 -1.241950  
C -3.955454 -1.233851 -0.587493  
C -2.385836 -1.612272 -2.395747  
C -4.764777 -2.260537 -1.078474  
H -4.264281 -0.687563 0.306893  
C -3.199474 -2.638902 -2.883552  
H -1.461368 -1.377028 -2.927367  
C -4.387387 -2.968422 -2.224447  
H -5.695910 -2.507595 -0.562725  
H -2.902932 -3.182620 -3.783881  
H -5.021133 -3.772533 -2.605925  
C -2.763237 1.667284 0.087599  
C -3.651327 2.273131 -0.820250  
C -2.734487 2.103599 1.420454  
C -4.488197 3.306487 -0.397458  
H -3.696073 1.930086 -1.857097  
C -3.576174 3.139430 1.840719  
H -2.057561 1.633634 2.133010  
C -4.450651 3.741784 0.933198  
H -5.176129 3.772346 -1.107205

H -3.548969 3.471694 2.881252  
H -5.108845 4.549869 1.261691  
C 1.751048 -2.064607 1.732873  
C 1.536809 -3.452742 2.349970  
C 0.955390 -4.499967 1.383843  
C -0.554181 -4.450411 1.107036  
C -1.142480 -3.098068 0.670796  
C -1.359120 -2.078170 1.785724  
H 1.689964 -2.127193 0.622179  
H 2.763025 -1.687895 1.913786  
H 2.515611 -3.822921 2.698856  
H 0.910486 -3.399050 3.257573  
H 1.504532 -4.428575 0.426519  
H 1.185927 -5.503254 1.779611  
H -1.103921 -4.779440 2.006003  
H -0.772936 -5.200164 0.327706  
H -0.475883 -2.669414 -0.136169  
H -2.080897 -3.262158 0.119542  
H -2.372752 -1.651466 1.794505  
H -1.129880 -2.464986 2.789443  
C 0.066305 0.333140 2.929984  
C 1.125121 -0.531996 3.238832  
H -0.917572 0.149283 3.369642  
H 0.301339 1.368984 2.667518  
H 2.144140 -0.140072 3.229785  
H 0.965404 -1.374704 3.915202

\*TS9-10A-19

Geometry with 77 atoms:

Total energy: -3045.568580240  
Cr -0.021609 -0.830814 1.256009  
P 1.730032 0.273904 -0.431024  
P -1.562174 0.291921 -0.481850  
C -0.547575 0.826016 -1.970534  
C 0.820998 0.139181 -2.052055  
H -1.127429 0.644170 -2.887454  
H -0.417111 1.914903 -1.882836  
H 0.711582 -0.936606 -2.267071  
H 1.421328 0.582254 -2.862162  
C 3.335310 -0.563806 -0.696452  
C 3.666796 -1.241500 -1.881195  
C 4.242150 -0.585747 0.380782  
C 4.880704 -1.930087 -1.982774  
H 2.988481 -1.242048 -2.736336  
C 5.455437 -1.265684 0.271720  
H 4.002640 -0.060163 1.309387  
C 5.775127 -1.944752 -0.909944  
H 5.127763 -2.454234 -2.909307  
H 6.153355 -1.269223 1.112536  
H 6.722401 -2.482816 -0.993390  
C 2.136933 2.067775 -0.345325  
C 3.362838 2.573232 -0.813568  
C 1.173278 2.966286 0.150078  
C 3.614957 3.947254 -0.785195  
H 4.125555 1.895590 -1.202547  
C 1.426348 4.340437 0.167405  
H 0.213066 2.603892 0.520791  
C 2.649016 4.833336 -0.297370  
H 4.572185 4.327097 -1.150887  
H 0.664802 5.023998 0.550441  
H 2.850516 5.907143 -0.278611  
C -2.834582 -0.829000 -1.178799  
C -4.151118 -0.803110 -0.690257  
C -2.467767 -1.808693 -2.118680  
C -5.082558 -1.745389 -1.134196  
H -4.453720 -0.049278 0.039654  
C -3.403496 -2.747244 -2.559784  
H -1.448169 -1.851594 -2.510372  
C -4.711484 -2.720516 -2.064856  
H -6.104614 -1.716200 -0.748877  
H -3.109092 -3.503359 -3.291583  
H -5.441702 -3.457520 -2.407352  
C -2.483654 1.798300 0.005943  
C -3.014279 2.666136 -0.966307  
C -2.675317 2.087964 1.365997  
C -3.707515 3.813661 -0.578199  
H -2.894788 2.448383 -2.030357  
C -3.375410 3.236424 1.750217  
H -2.280140 1.414924 2.126851  
C -3.886723 4.101971 0.780090  
H -4.114192 4.484159 -1.339216

H -3.519086 3.453493 2.811432  
H -4.430341 5.001225 1.080134  
C 1.414771 -2.212767 2.249781  
C 1.416732 -3.025948 0.936868  
C 0.074439 -3.299007 0.220450  
C -1.012278 -3.973577 1.086441  
C -2.130678 -3.012325 1.509772  
C -1.638320 -1.733836 2.198267  
H 2.458627 -2.125207 2.570660  
H 0.854229 -2.743840 3.028607  
H 2.138945 -2.603310 0.224148  
H 1.829790 -4.013475 1.216983  
H -0.346699 -2.383648 -0.259971  
H 0.312030 -3.916953 -0.660026  
H -0.535107 -4.416120 1.978073  
H -1.454403 -4.816019 0.531184  
H -2.708278 -2.747122 0.610804  
H -2.839681 -3.554559 2.164116  
H -2.466271 -1.008839 2.293325  
H -1.287040 -1.947383 3.224497  
C 0.191740 0.591629 2.783633  
C 1.258194 -0.261535 3.151388  
H -0.708886 0.587931 3.403856  
H 0.434290 1.542444 2.303220  
H 2.274898 0.037964 2.883756  
H 1.192929 -0.828368 4.082740

\*TS9-10A-20

Geometry with 77 atoms:

Total energy: -3045.567450580  
Cr -0.058115 -0.746140 1.218748  
P 1.741256 0.276743 -0.456966  
P -1.535197 0.335549 -0.576022  
C -0.498472 0.921383 -2.022216  
C 0.869746 0.229815 -2.102550  
H -1.060250 0.778538 -2.957319  
H -0.359539 2.004754 -1.890378  
H 0.766641 -0.832121 -2.377623  
H 1.493244 0.712279 -2.871538  
C 3.344285 -0.562866 -0.720716  
C 3.685755 -1.221627 -1.913544  
C 4.247601 -0.591944 0.359845  
C 4.905536 -1.898852 -2.019626  
H 3.012908 -1.212087 -2.773160  
C 5.466426 -1.261545 0.246190  
H 4.004173 -0.072073 1.290840  
C 5.795823 -1.921587 -0.943335  
H 5.161352 -2.406212 -2.953072  
H 6.161930 -1.269410 1.088986  
H 6.748448 -2.449390 -1.031214  
C 2.158592 2.062875 -0.285747  
C 3.407192 2.578685 -0.675447  
C 1.177828 2.946992 0.202641  
C 3.666256 3.948247 -0.573575  
H 4.182900 1.913468 -1.060085  
C 1.437828 4.316821 0.292135  
H 0.203303 2.572641 0.520341  
C 2.684535 4.819708 -0.091427  
H 4.642149 4.336131 -0.876057  
H 0.664020 4.988989 0.670823  
H 2.892148 5.889670 -0.012867  
C -2.713656 -0.867839 -1.314135  
C -4.041922 -0.942067 -0.862487  
C -2.261172 -1.800140 -2.264810  
C -4.899371 -1.928914 -1.356922  
H -4.416309 -0.225062 -0.129028  
C -3.122473 -2.784026 -2.756764  
H -1.233826 -1.768916 -2.633023  
C -4.443062 -2.852538 -2.301859  
H -5.931822 -1.972226 -1.001922  
H -2.759338 -3.498459 -3.499598  
H -5.116280 -3.622281 -2.686618  
C -2.560742 1.769645 -0.083778  
C -2.947239 2.757665 -1.006846  
C -2.992274 1.866223 1.250473  
C -3.739171 3.831298 -0.593692  
H -2.637865 2.695909 -2.052483  
C -3.792849 2.937885 1.656183  
H -2.711022 1.097979 1.972069  
C -4.161976 3.923798 0.736953  
H -4.032131 4.596872 -1.316162

H -4.125502 3.002178 2.694940  
H -4.782665 4.764731 1.055856  
C 1.464442 -2.064453 2.219894  
C 1.265020 -2.995298 0.980335  
C -0.118466 -3.211404 0.325694  
C -1.208286 -3.858175 1.186669  
C -1.559143 -3.055177 2.445874  
C -1.753241 -1.564879 2.148153  
H 2.507610 -1.732193 2.193673  
H 1.311012 -2.654610 3.128650  
H 1.962058 -2.670696 0.193643  
H 1.621599 -3.989570 1.303334  
H -0.530820 -2.280849 -0.132347  
H 0.055188 -3.828769 -0.570699  
H -0.890916 -4.880387 1.456749  
H -2.110356 -3.965670 0.560179  
H -2.473957 -3.486845 2.894638  
H -0.774099 -3.194290 3.208126  
H -2.625006 -1.438370 1.483042  
H -1.973460 -1.007181 -3.074332  
C 0.253000 0.685220 2.687042  
C 0.843869 -0.432890 3.348579  
H -0.738209 1.011129 3.014126  
H 0.922164 1.491238 2.373112  
H 1.889506 -0.364739 3.655839  
H 0.223593 -0.991352 4.053685

\*TS9-10A-21

Geometry with 77 atoms:

Total energy: -3045.561601230  
Cr 0.066239 -0.500435 1.110173  
P 1.567128 0.566463 -0.552374  
P -1.717119 0.236344 -0.501840  
C -0.836316 1.048174 -1.937085  
C 0.604452 0.565597 -2.150272  
H -1.440406 0.924146 -2.848976  
H -0.853616 2.123989 -1.710450  
H 0.617761 -0.466082 -2.529314  
H 1.115331 1.202726 -2.888227  
C 3.081381 -0.413202 -0.843537  
C 3.495705 -0.840408 -2.114162  
C 3.847609 -0.761591 0.284139  
C 4.654899 -1.611222 -2.250408  
H 2.925831 -0.577220 -3.007470  
C 5.010031 -1.520933 0.142688  
H 3.535173 -0.433661 1.280023  
C 5.412528 -1.951387 -1.126398  
H 4.968307 2.309412 -3.243002  
H 5.598831 -1.783533 1.024904  
H 6.318014 -2.552509 -1.238588  
C 2.145620 2.309412 -0.395623  
C 3.505302 2.653247 -0.484414  
C 1.201261 3.331177 -0.176550  
C 3.906924 3.986953 -0.359783  
H 4.259251 1.882554 -0.653500  
C 1.605483 4.662715 -0.063130  
H 0.138499 3.098651 -0.090540  
C 2.961265 4.994121 -0.151548  
H 4.968274 4.237641 -0.430112  
H 0.857836 5.442516 0.101351  
H 3.279173 6.035144 -0.056005  
C -2.652973 -1.184837 -1.169641  
C -3.538620 -1.847445 -0.298973  
C -2.437729 -1.702978 -2.454957  
C -4.209899 -2.996519 -0.717463  
H -3.707222 -1.462480 0.710945  
C -3.109429 -2.858493 -2.868353  
H -1.741517 -1.222783 -3.144834  
C -3.995462 -3.505373 -2.004055  
H -4.901116 -3.499085 -0.036641  
H -2.935429 -3.253685 -3.872052  
H -4.518049 -4.407898 -2.329862  
C -2.991677 1.479948 -0.053578  
C -4.262201 1.478353 -0.656227  
C -2.666235 2.499832 0.859018  
C -5.185996 2.480485 -0.348747  
H -4.536145 0.694826 -1.365459  
C -3.592648 3.502022 1.159020  
H -2.1690370 2.519070 1.345338  
C -4.854377 3.493088 0.556931  
H -6.170761 2.469379 -0.822206

H -3.328043 4.287722 1.870638  
H -5.580471 4.274107 0.794985  
C -0.784221 -1.540201 2.821851  
C 0.652426 -1.972510 3.040298  
C 0.995181 -3.461193 2.931825  
C 0.671445 -4.128938 1.590590  
C 1.170524 -3.373566 0.348073  
C 0.243253 -2.245930 -0.131942  
H -1.411033 -1.596082 3.714270  
H -1.317543 -2.085641 2.024538  
H 1.353530 -1.432654 2.327860  
H 0.996877 -1.579539 4.011011  
H 2.075571 -3.566732 3.133695  
H 0.476331 -3.994114 3.746848  
H -0.418313 -4.286204 1.498460  
H 1.114933 -5.138055 1.611641  
H 2.200099 -3.007815 0.519184  
H 1.266539 -4.109679 -0.472176  
H 0.506996 -1.993463 -1.170868  
H -0.781872 -2.650442 -0.185450  
C 0.351790 1.178560 2.470322  
C -0.694798 0.505965 3.155728  
H 0.114461 2.027294 1.828154  
H 1.336414 1.244870 2.944894  
H -0.525913 0.238376 4.200986  
H -1.733096 0.790848 2.953248

\*TS9-10B-01

Geometry with 85 atoms:

Total energy: -3274.483068060  
Cr -0.534934 -0.689184 1.055591  
P 1.576358 -0.304888 -0.351180  
P -1.489834 0.393053 -0.987335  
C -0.346474 0.048023 -2.405225  
C 1.093030 0.406809 -2.018623  
H -0.436761 -1.026977 -2.630832  
H -0.663269 0.605755 -3.300805  
H 1.806244 0.046312 -2.771213  
H 1.209063 1.498377 -1.974899  
C 2.707010 -1.689670 -0.749791  
C 2.431105 -2.997340 -0.327015  
C 3.900776 -1.441314 -1.478027  
C 3.311358 -4.047501 -0.603532  
H 1.512983 -3.201129 0.221712  
C 4.788477 -2.493094 -1.745612  
C 4.487404 -3.786641 -1.308003  
H 3.078345 -5.059476 -0.266407  
H 5.710292 -2.311935 -2.298419  
H 5.186712 -4.597610 -1.526676  
C 2.669485 0.941367 0.451231  
C 2.571821 2.318024 0.198707  
C 3.577017 0.493445 1.427700  
C 3.370294 3.226588 0.900716  
H 1.870493 2.705855 -0.540670  
C 4.371750 1.403018 2.129088  
H 3.674653 -0.574705 1.635597  
C 4.271965 2.773977 1.868153  
H 3.284020 4.294893 0.686101  
H 5.076677 1.037002 2.879744  
H 4.897369 3.484917 2.413567  
C -1.313371 2.190795 -0.689880  
C -1.725052 3.134999 -1.644060  
C -0.740342 2.640425 0.519152  
C -1.570314 4.502205 -1.418234  
H -2.183928 2.784777 -2.572513  
C -0.585484 4.014993 0.750926  
C -0.999253 4.932744 -0.217467  
H -1.896220 5.225193 -2.168669  
H -0.137382 4.381744 1.672470  
H -0.871811 6.000473 -0.023106  
C -3.193578 0.167867 -1.595375  
C -4.249627 0.727405 -0.851760  
C -3.486437 -0.646754 -2.702028  
C -5.574436 0.476010 -1.212412  
H -4.036664 1.368032 0.007913  
C -4.815617 -0.894662 -3.057565  
H -2.686683 -1.099468 -3.291342  
C -5.860124 -0.338015 -2.314304  
H -6.387286 0.917519 -0.630781  
H -5.034135 -1.527540 -3.921114  
H -6.897601 -0.535823 -2.594239

O 4.099910 -0.166601 -1.878912  
 O -0.337506 1.689048 1.433078  
 C 5.334069 0.216784 -2.463825  
 H 5.272884 1.301547 -2.623507  
 H 6.182254 -0.000710 -1.792442  
 H 5.498189 -0.281397 -3.434995  
 C 0.155207 2.137049 2.703754  
 H 1.093537 2.697005 2.581581  
 H -0.598833 2.754618 3.215501  
 H 0.351977 1.242583 3.301299  
 C -2.237310 -0.504163 2.464875  
 C -3.319449 -1.358546 3.110101  
 C -4.058539 -2.320990 2.173967  
 C -3.243822 -3.418791 1.469104  
 C -2.492800 -3.028569 0.179197  
 C -1.043288 -2.550251 0.315669  
 H -2.069852 0.430719 3.016593  
 H -2.598710 -0.222508 1.456022  
 H -2.920888 -1.919506 3.975139  
 H -4.072589 -0.675105 3.543962  
 H -4.845101 -2.810526 2.773417  
 H -4.594498 -1.734745 1.404717  
 H -3.958385 -4.213765 1.198245  
 H -2.544178 -3.890370 2.183948  
 H -2.479498 -3.925239 -0.470083  
 H -3.098591 -2.291675 -0.376420  
 H -0.483260 -3.269022 0.942821  
 H -0.562968 -2.573128 -0.680413  
 C 0.763634 -1.350491 2.631441  
 C 0.487794 -1.515179 3.259518  
 H 1.433558 -0.552153 2.966363  
 H 1.267762 -2.229358 2.222392  
 H -0.948231 -2.504728 3.243944  
 H -0.726127 -0.933687 4.153338

<sup>4</sup>TS9-10B-02

Geometry with 85 atoms:

Total energy: -3274.481313740  
 Cr -0.305063 -0.556061 1.016659  
 P 1.584067 0.063015 -0.660966  
 P -1.621802 0.450147 -0.863518  
 C -0.652638 0.270440 -2.430314  
 C 0.776476 0.771536 -2.197400  
 H -0.670907 -0.798877 -2.692431  
 H -1.136285 0.826296 -3.249060  
 H 1.411731 0.590960 -3.077136  
 H 0.766703 1.860474 -2.034457  
 C 2.533542 -1.382673 -1.277110  
 C 2.255461 -2.018476 -2.494647  
 C 3.545694 -1.920632 -0.445049  
 C 2.962605 -3.156758 -2.894428  
 H 1.477307 -1.629933 -3.153765  
 C 4.262995 -3.055102 -0.847838  
 C 3.964011 -3.668153 -2.068430  
 H 2.730526 -3.637189 -3.847104  
 H 5.048834 -3.466910 -0.214806  
 H 4.524900 -4.555923 -2.370813  
 C 2.858787 1.336248 -0.304229  
 C 2.869134 1.989190 0.935231  
 C 3.819375 1.675573 -1.270931  
 C 3.819995 2.977484 1.205458  
 H 2.138692 1.711606 1.693118  
 C 4.768812 2.663609 -0.999770  
 H 3.835653 1.159639 -2.234589  
 C 4.769720 3.317436 0.237721  
 H 3.823183 3.479748 2.176351  
 H 5.514183 2.921668 -1.756150  
 H 5.514716 4.088810 0.448065  
 C -1.576728 2.248672 -0.521848  
 C -2.106534 3.176315 -1.432983  
 C -0.978640 2.719558 0.665863  
 C -2.039121 4.547017 -1.187436  
 H -2.588984 2.810267 -2.343301  
 C -0.910309 4.096886 0.917302  
 C -1.435691 4.998739 -0.010813  
 H -2.455677 5.256842 -1.904946  
 H -0.447249 4.479449 1.825329  
 H -1.372429 6.069560 0.196964  
 C -3.361062 0.074811 -1.261067  
 C -4.364522 0.530165 -0.385575  
 C -3.713984 -0.748201 -2.344305

C -5.696996 0.169765 -0.594452  
 H -4.106184 1.176390 0.457200  
 C -5.050296 -1.104172 -2.548282  
 H -2.954988 -1.122013 -3.034595  
 C -6.042363 -0.649368 -1.674929  
 H -6.469283 0.531932 0.088492  
 H -5.315736 -1.740887 -3.395710  
 H -7.085554 -0.930933 -1.837061  
 O 3.752354 -1.266497 0.720860  
 O -0.474478 1.786640 1.554941  
 C 4.783719 -1.672245 1.603423  
 H 4.765814 -0.962944 2.441585  
 H 4.611431 -2.691840 1.989887  
 H 5.772698 -1.626671 1.115943  
 C -0.199430 2.224933 2.892121  
 H 0.065648 1.334976 3.471362  
 H 0.644053 2.931293 2.915252  
 H -1.090939 2.695411 3.335123  
 C -1.946785 -0.786729 2.509261  
 C -2.819129 -2.881627 3.109865  
 C -3.395193 -2.902672 2.122547  
 C -2.415078 -3.782884 1.327845  
 C -1.806085 -3.182542 0.044912  
 H -0.477406 -2.428620 0.155944  
 H -1.935780 0.110504 3.142363  
 H -2.409828 -0.489866 1.549146  
 H -2.288223 -2.414126 3.920393  
 H -3.673783 -1.390466 3.610922  
 H -4.057872 -3.567765 2.702447  
 H -4.055772 -2.378678 1.406972  
 H -2.976930 -4.682775 1.026748  
 H -1.610768 -4.153957 1.990191  
 H -1.640261 -4.023589 -0.656120  
 H -2.572356 -2.556612 -0.446697  
 H 0.265501 -3.054364 0.685241  
 H -0.069947 -2.291979 -0.861651  
 C 1.152339 -1.069989 2.497715  
 C -0.010087 -1.507826 3.160241  
 H 1.689607 -0.190826 2.866900  
 H 1.770645 -1.795897 1.968134  
 H -0.286378 -2.560210 3.076309  
 H -0.302697 -1.051945 4.109315

<sup>4</sup>TS9-10B-03

Geometry with 85 atoms:

Total energy: -3274.483582580  
 Cr -0.076255 0.084696 1.313708  
 P 1.642171 0.494402 -0.672613  
 P -1.591171 -0.011964 -0.697089  
 C -0.741303 0.752200 -2.163627  
 C 0.719322 0.305310 -2.277787  
 H -1.307587 0.527648 -3.080619  
 H -0.819175 1.835626 -1.998022  
 H 0.784460 -0.766867 -2.509403  
 H 1.246199 0.840797 -3.082585  
 C 3.105841 -0.590153 -0.896490  
 C 4.421895 -0.128589 -1.034678  
 C 2.869104 -1.987433 -0.895110  
 C 5.489263 -1.024922 -1.148226  
 H 4.620821 0.944059 -1.057069  
 C 3.936751 -2.886970 -1.007764  
 C 5.241925 -2.398178 -1.128995  
 H 6.508351 -0.647192 -1.254261  
 H 3.761347 -3.962455 -1.007670  
 H 6.069732 -3.106354 -1.215296  
 C 2.288108 2.211788 -0.655354  
 C 3.131587 2.599602 0.404249  
 C 1.875058 3.186187 -1.579009  
 C 3.561061 3.921837 0.526811  
 H 3.466332 1.859646 1.134846  
 C 2.298128 4.513554 -1.447477  
 H 1.216413 2.926930 -2.409233  
 C 3.140502 4.885204 -0.396886  
 H 4.223419 4.202455 1.349390  
 H 1.968145 5.258385 -2.175897  
 H 3.471295 5.921839 -0.298124  
 C -3.250984 0.771797 -0.663708  
 C -4.436091 0.040867 -0.828627  
 C -3.336590 2.163935 -0.413004  
 C -5.684979 0.662047 -0.738031  
 H -4.388509 -1.029902 -1.032173

C -4.588535 2.786215 -0.318548  
 C -5.754440 2.031006 -0.478726  
 H -6.596134 0.075085 -0.870503  
 H -4.663512 3.855579 -0.123018  
 H -6.725021 2.527236 -0.402000  
 C -1.912163 -1.760256 -1.178693  
 C -1.688234 -2.260206 -2.472052  
 C -2.397104 -2.635804 -0.189118  
 C -1.936426 -3.605345 -2.764311  
 H -1.321486 -1.611963 -3.269364  
 C -2.657673 -3.975574 -0.486745  
 H -2.586185 -2.265157 0.818240  
 C -2.422624 -4.465627 -1.775844  
 H -1.754165 -3.979244 -3.774846  
 H -3.043555 -4.637405 0.292548  
 H -2.620099 -5.514637 -2.009600  
 O 1.565978 -2.361018 -0.792659  
 O -2.155268 2.821110 -0.294006  
 C 1.222030 -3.736090 -0.710452  
 H 0.134858 -3.775379 -0.578880  
 H 1.490955 -4.273614 -1.635278  
 H 1.712311 -4.223989 0.149596  
 C -2.137192 4.212958 -0.020702  
 H -1.080373 4.504766 0.031453  
 H -2.628971 4.787866 -0.824362  
 H -2.622134 4.443330 0.943198  
 C 1.641769 -0.211715 2.686510  
 C 1.260987 -1.642344 2.277037  
 C 0.803109 -2.550653 3.422672  
 C -0.405954 -2.053587 4.221753  
 C -1.647477 -1.761507 3.367545  
 C -1.628872 -0.409181 2.642599  
 H 2.571900 0.093225 2.195434  
 H 1.784224 -0.175946 3.770746  
 H 0.489915 -1.743259 1.448690  
 H 2.132115 -2.083270 1.768819  
 H 0.570676 -3.544618 3.001524  
 H 1.660668 -2.696631 4.101551  
 H -0.137003 -1.146977 4.793754  
 H -0.645560 -2.820873 4.976487  
 H -1.781751 -2.596512 2.654499  
 H -2.536205 -1.802144 4.025850  
 H -2.576621 -0.267088 2.092061  
 H -1.618557 0.389177 3.406681  
 C -0.126197 2.088714 1.839968  
 C 0.766127 1.647955 2.862165  
 H -1.169756 2.280334 2.100736  
 H 0.275033 2.713638 1.038197  
 H 1.776262 2.064352 2.876811  
 H 0.347984 1.487225 3.858893

<sup>4</sup>TS9-10B-04

Geometry with 85 atoms:

Total energy: -3274.479727900  
 Cr -0.259578 -0.405818 1.085419  
 P 1.604362 0.144837 -0.661582  
 P -1.636240 0.379962 -0.872636  
 C -0.629553 0.251337 -2.425661  
 C 0.761351 0.844747 -2.177565  
 H -0.569268 -0.815404 -2.689994  
 H -1.144126 0.771423 -3.249092  
 H 1.412681 0.731469 -3.057651  
 H 0.683116 1.926406 -1.984019  
 C 2.514419 -1.321656 -1.284861  
 C 2.259539 -1.920667 -2.525611  
 C 3.476633 -1.912608 -0.428889  
 C 2.938223 -3.077271 -2.922821  
 H 1.524453 -1.488644 -3.206168  
 C 4.165895 -3.064968 -0.828863  
 C 3.888277 -3.642573 -2.071776  
 H 7.275131 -3.528976 -3.893807  
 H 4.913920 -3.517450 -0.178111  
 H 4.426714 -4.544764 -2.372325  
 C 2.909302 1.400134 -0.355696  
 C 2.770315 2.291375 0.717352  
 C 4.027729 1.504790 -1.198632  
 C 3.730825 3.281720 0.943438  
 H 1.909723 2.204769 1.378823  
 C 4.987240 2.493669 -0.969952  
 H 4.156962 0.805932 -2.028952  
 C 4.840333 3.384353 0.099649

H 3.615512 3.970793 1.784122  
H 5.855904 2.568010 -1.629008  
H 5.594086 4.155641 0.276433  
C -1.841854 2.186544 -0.665526  
C -2.515932 2.956848 -1.627284  
C -1.282540 2.829620 0.458794  
C -2.642835 4.337970 -1.485917  
H -2.958311 2.457362 -2.493013  
C -1.411880 4.218183 0.606178  
C -2.086846 4.960550 -0.365562  
H -3.171892 4.922918 -2.240943  
H -0.988117 4.734965 1.465437  
H -2.176729 6.041951 -0.237770  
C -3.289699 -0.281385 -1.262712  
C -4.434366 0.278675 -0.667515  
C -3.416601 -1.456659 -2.025282  
C -5.682381 -0.325007 -0.837455  
H -4.354892 1.191027 -0.072104  
C -4.668320 -2.054042 -2.192510  
H -2.542831 -1.919896 -2.488747  
C -5.802371 -1.492447 -1.597608  
H -6.565341 0.120114 -0.372435  
H -4.755933 -2.965214 -2.789139  
H -6.779312 -1.964154 -1.727548  
O 3.664988 -1.286684 0.755151  
O -0.614040 2.051591 1.384309  
C 4.654085 -1.744381 1.661448  
H 4.631114 -1.054969 2.515518  
H 4.438294 -2.766716 2.017536  
H 5.659009 -1.718886 1.206197  
C -0.332575 2.638438 2.660421  
H 0.122851 1.858440 3.276914  
H 0.379400 3.473137 2.570124  
H -1.259981 2.990293 3.139188  
C -1.893533 -0.466884 2.656334  
C -2.783086 -1.668910 2.959638  
C -3.170713 -2.535708 1.748072  
C -2.273954 -3.745237 1.460511  
C -0.764555 -3.489063 1.376493  
C -0.324604 -2.378658 0.420135  
H -1.958821 0.280551 3.455510  
H -2.292266 0.052045 1.763706  
H -2.336764 -2.298468 3.751803  
H -3.710604 -1.269756 3.409571  
H -4.196779 -2.912256 1.894564  
H -3.227425 -1.893927 0.855055  
H -2.609939 -4.194125 0.508165  
H -2.450689 -4.514447 2.233954  
H -0.362119 -3.312177 2.388624  
H -0.290545 -4.438634 1.061140  
H 0.724648 -2.543103 0.128627  
H -0.921129 -2.426357 -0.510022  
C 1.217108 -0.731613 2.589405  
C 0.091016 -0.874787 3.423698  
H 1.852215 0.155464 2.685731  
H 1.724603 -1.622043 2.212978  
H -0.244447 -1.873638 3.706201  
H -0.086194 -0.126874 4.199272

<sup>4</sup>TS9-10B-05

Geometry with 85 atoms:

Total energy: -3274.480729800

Cr -0.542743 -0.735536 1.023035  
P 1.553500 -0.249876 -0.388132  
P -1.518873 0.480213 -0.950470  
C -0.394596 0.215305 -2.399408  
C 1.054487 0.537141 -2.016713  
H -0.499099 -0.843382 -2.687864  
H -0.718420 0.827129 -3.256189  
H 1.751901 0.198916 -2.793884  
H 1.191423 1.623733 -1.926163  
C 2.669027 -1.626391 -0.846903  
C 2.401565 -2.939184 -0.434905  
C 3.845586 -1.368622 -1.599285  
C 3.269547 -3.987777 -0.752450  
H 1.500765 -3.145501 0.141137  
C 4.720364 -2.419489 -1.909976  
C 4.425425 -3.719315 -1.486959  
H 3.043254 -5.004131 -0.424126  
H 5.627832 -2.232665 -2.484257  
H 5.114539 -4.529124 -1.739616

C 2.660656 0.960589 0.447460  
C 3.659301 0.478560 1.312582  
C 2.474479 2.347025 0.334939  
C 4.455688 1.365223 2.041094  
H 3.827436 -0.596457 1.411043  
C 3.273759 3.232370 1.064884  
H 1.705170 2.759170 -0.318460  
C 4.265914 2.745993 1.920786  
H 5.232183 0.973676 2.703009  
H 3.117196 4.308951 0.958684  
H 4.892102 3.438815 2.488169  
C -1.346866 2.259907 -0.558834  
C -1.715763 3.247528 -1.486396  
C -0.829942 2.651751 0.693936  
C -1.572254 4.602797 -1.193054  
H -2.130739 2.941695 -2.450435  
C -0.688544 4.015168 0.994061  
C -1.057811 4.977102 0.051111  
H -1.863310 5.359368 -1.924407  
H -0.283518 4.340594 1.950119  
H -0.939987 6.034526 0.300074  
C -3.228190 0.296890 -1.559718  
C -4.274650 0.766398 -0.743861  
C -3.534440 -0.401211 -2.739185  
C -5.603647 0.544387 -1.106773  
H -4.049996 1.312335 0.176377  
C -4.868223 -0.620174 -3.097268  
H -2.742266 -0.787579 -3.383362  
C -5.903205 -0.151402 -2.283534  
H -6.409222 0.915691 -0.468612  
H -5.097681 -1.162469 -4.017816  
H -6.944074 -0.326942 -2.565787  
O 4.044317 -0.086180 -1.975191  
O -0.464092 1.659553 1.580188  
C 5.270653 0.303601 -2.572675  
H 5.214028 1.392255 -2.704924  
H 6.128544 0.064085 -1.921422  
H 5.414328 -0.171391 -3.558537  
C 0.002895 2.066702 2.873223  
H 0.936462 2.641907 2.786900  
H -0.766078 2.657097 3.395231  
H 0.201376 1.157382 3.444580  
C -2.274929 -0.833735 2.406249  
C -3.140686 -1.937693 3.011911  
C -2.928396 -3.371708 2.503475  
C -3.267587 -3.681562 1.040301  
C -2.571552 -2.843331 -0.047949  
H -1.074229 -2.550093 0.159500  
H -2.356527 0.099880 2.981636  
H -2.646416 -0.599558 1.391406  
H -2.993568 -1.940711 4.106419  
H -4.202483 -1.661677 2.864299  
H -1.885699 -3.676427 2.690272  
H -3.536682 -4.041089 3.135750  
H -4.359389 -3.599748 0.892846  
H -3.023261 -4.746398 0.876470  
H -2.712771 -3.375341 -1.006889  
H -3.136587 -1.907784 -0.182043  
H -0.595510 -3.341988 0.764206  
H -0.551266 -2.543409 -0.813039  
C 0.837340 -1.297643 2.568808  
C -0.359971 -1.432944 3.296003  
H 1.490602 -0.439135 2.753213  
H 1.346166 -2.200599 2.219826  
H -0.731638 -2.437603 3.489478  
H -0.601730 -0.718240 4.086047

<sup>4</sup>TS9-10B-06

Geometry with 85 atoms:

Total energy: -3274.479601830

Cr -0.108302 -0.006635 1.098637  
P 1.662787 0.288121 -0.755535  
P -1.597609 0.217719 -0.950319  
C -0.557546 0.228785 -2.489101  
C 0.747759 0.988306 -2.222869  
H -0.353104 -0.818369 -2.758426  
H -1.124166 0.683207 -3.316680  
H 1.395247 1.009293 -3.112554  
H 0.533087 2.039976 -1.973978  
C 2.436426 -1.250512 -1.394445  
C 2.377796 -1.632167 -2.743420

C 3.064652 -2.124872 -0.473026  
C 2.898632 -2.854254 -3.177042  
H 1.922532 -0.972067 -3.482368  
C 3.580385 -3.355631 -0.904153  
C 3.489999 -3.714573 -2.251375  
H 2.840838 -3.128009 -4.232481  
H 4.054883 -4.035746 -0.197517  
H 3.895119 -4.676297 -2.575547  
C 3.029151 1.486075 -0.500918  
C 4.378355 1.100558 -0.501639  
C 2.701052 2.829034 -0.239050  
C 5.379001 2.043922 -0.248467  
H 4.655808 0.065696 -0.706742  
C 3.703606 3.769416 0.005243  
H 1.656588 3.147440 -0.233724  
C 5.046710 3.377408 0.005039  
H 6.426410 1.732305 -0.254957  
H 3.435925 4.811672 0.196836  
H 5.832450 4.111431 0.199182  
C -2.308798 1.904587 -0.897852  
C -3.362911 2.278240 -1.746972  
C -1.798586 2.849090 0.017841  
C -3.919115 3.555899 -1.689366  
H -3.762883 1.545435 -2.452012  
C -2.365428 4.130157 0.087905  
C -3.418298 4.473749 -0.764288  
H -4.740677 3.828864 -2.354645  
H -2.000964 4.869692 0.798113  
H -3.848329 5.475869 -0.696062  
C -3.012875 -0.888750 -1.265063  
C -4.178080 -0.731021 -0.490574  
C -2.913012 -1.985928 -2.136617  
C -5.223395 -1.649988 -0.594722  
H -4.272755 0.113895 0.195922  
C -3.963444 -2.902951 -2.236181  
H -2.015946 -2.143596 -2.738275  
C -5.118242 -2.739274 -1.466314  
H -6.124124 -1.515122 0.008999  
H -3.875841 -3.750753 -2.919897  
H -5.936111 -3.459553 -1.544634  
O 3.147349 -1.681532 0.801973  
O -0.737763 2.463450 0.814106  
C 3.730360 -2.503872 1.800832  
H 4.790862 -2.715558 1.581087  
H 3.671720 -1.941006 2.741753  
H 3.180782 -3.453753 1.914905  
C -0.224778 3.431345 1.735877  
H 0.075390 4.353003 1.214253  
H -0.969669 3.670219 2.511473  
H 0.663055 2.995302 2.199536  
C -1.698511 -0.002461 2.672084  
C -2.090457 -0.996167 3.766558  
C -1.346929 -2.340486 3.790863  
C -1.636357 -3.332917 2.659356  
C -1.400396 -2.846932 1.219960  
C -0.095747 -2.078424 0.969384  
H -2.105587 0.999223 2.871675  
H -2.148826 -0.327492 1.716492  
H -1.952347 -0.509134 4.747940  
H -3.177774 -1.190867 3.692976  
H -0.260068 -2.155058 3.824266  
H -1.585450 -2.841012 4.745067  
H -2.679968 -3.685990 2.742320  
H -1.004205 -4.221152 2.839515  
H -1.431038 -3.737706 0.564916  
H -2.269514 -2.253492 0.894079  
H 0.716431 -2.412829 1.638148  
H 0.254354 -2.260174 -0.060364  
C 1.407162 0.469174 2.531726  
C 0.314249 0.500706 3.412956  
H 1.878078 1.395927 2.189035  
H 2.060180 -0.403727 2.523088  
H 0.208103 -0.297252 4.145344  
H -0.077952 1.461956 3.752763

<sup>4</sup>TS9-10B-07

Geometry with 85 atoms:

Total energy: -3274.479495860

O 2.221453 -0.778092 1.008968  
P -1.713434 0.498372 -0.496948  
P 1.561146 0.578544 -0.658112



H 1.116209 -0.678485 4.037176  
H 2.368442 -1.451659 1.334239  
H 3.172414 -1.051871 2.832871  
H 3.262947 -3.319095 3.075483  
H 1.663875 -3.125979 3.776616  
H 1.828168 -5.001049 2.161950  
H 2.336718 -3.904534 0.879509  
H -0.036744 -4.725308 0.779132  
H -0.422699 -3.840830 2.235965  
H 0.652261 -2.516964 -0.347268  
H -1.070038 -2.785193 -0.023558  
C -1.940752 -1.241058 2.411336  
C -0.937977 -1.324659 3.402613  
H -2.336582 -2.158737 1.968658  
H -2.639176 -0.398964 2.454665  
H -0.942880 -0.582216 4.204087  
H -0.567559 -2.302207 3.717222

#### <sup>4</sup>TS9-10B-10

Geometry with 85 atoms:

Total energy: -3274.477757980

Cr -0.610043 -0.778723 0.884055  
P 1.548225 -0.231848 -0.402921  
P -1.494043 0.572422 -0.998578  
C -0.357162 0.328140 -2.438493  
C 1.096512 0.595823 -2.027577  
H -0.484441 -0.720706 -2.751994  
H -0.652138 0.968232 -3.285082  
H 1.791539 0.244431 -2.800904  
H 1.271645 1.675298 -1.920074  
C 2.719119 -1.570869 -0.842739  
C 2.494940 -2.893654 -0.435175  
C 3.905839 -1.267290 -1.560866  
C 3.410318 -3.907864 -0.730008  
H 1.592064 -3.136294 0.124228  
C 4.826373 -2.284161 -1.852547  
C 4.571309 -3.595002 -1.438321  
H 3.216344 -4.931865 -0.404776  
H 5.740581 -2.062081 -2.402865  
H 5.296519 -4.377610 -1.675062  
C 2.599494 0.968121 0.517204  
C 3.519983 0.464046 1.454127  
C 2.447773 2.357898 0.398781  
C 4.273199 1.332310 2.247913  
H 3.660126 -0.614623 1.558367  
C 3.205008 3.224976 1.192787  
H 1.734589 2.786752 -0.305565  
C 4.118939 2.716962 2.120340  
H 4.988296 0.923444 2.966146  
H 3.075479 4.043634 1.081933  
H 4.711584 3.395745 2.738445  
C -1.332301 2.330316 -0.532244  
C -1.690473 3.365458 -1.410387  
C -0.830302 2.652778 0.747274  
C -1.549524 4.702742 -1.041872  
H -2.095164 3.111362 -2.393769  
C -0.691856 3.997523 1.122358  
C -1.049054 5.008459 0.226749  
H -1.831144 5.498689 -1.734103  
H -0.298136 4.270827 2.099565  
H -0.933636 6.050992 0.533099  
C -3.200601 0.360718 -1.600235  
C -4.254097 0.841875 -0.799471  
C -3.498322 -0.384429 -2.753908  
C -5.579924 0.589040 -1.154519  
H -4.037845 1.421063 0.102103  
C -4.829223 -0.634260 -3.103297  
H -2.701638 -0.776576 -3.388814  
C -5.870321 -0.150839 -2.306325  
H -6.390386 0.971386 -0.529185  
H -5.051093 -1.210449 -4.004873  
H -6.908821 -0.349065 -2.582251  
O 4.070814 0.024434 -1.921163  
O -0.480142 1.612163 1.580699  
C 5.292036 0.455957 -2.500581  
H 5.463830 -0.010394 -3.486071  
H 5.202258 1.542766 -2.629539  
H 6.148969 0.241467 -1.839286  
C -0.005785 1.939708 2.892389  
H 0.210669 0.996677 3.401362  
H 0.920085 2.530577 2.836426

H -0.776478 2.485980 3.458800  
C -2.439878 -0.897359 2.083826  
C -3.381108 -1.842415 2.818771  
C -3.309627 -3.340215 2.461398  
C -3.077944 -3.718699 0.988019  
C -1.614851 -3.725565 0.480303  
C -1.120921 -2.458857 -0.228072  
H -2.506121 0.125330 2.488224  
H -2.770845 -0.865051 1.030112  
H -3.254328 -1.734086 3.910571  
H -4.408274 -1.486141 2.612950  
H -2.533986 -3.842013 3.066323  
H -4.257399 -3.793795 2.796054  
H -3.696664 -3.082522 0.328394  
H -3.473301 -4.739687 0.860019  
H -0.940369 -4.006627 1.311008  
H -1.526894 -4.558912 -0.242701  
H -0.215538 -2.685261 -0.815944  
H -1.891250 -2.157530 -0.961711  
C 0.654354 -1.502735 2.472814  
C -0.593608 -1.611192 3.104163  
H 1.330222 -0.680400 2.727566  
H 1.140537 -2.411208 2.107584  
H -1.026101 -2.602614 3.219251  
H -0.880320 -0.907009 3.889424

#### <sup>4</sup>TS9-10B-11

Geometry with 85 atoms:

Total energy: -3274.478784290

Cr -0.280628 -0.415462 1.188276  
P 1.683206 0.000452 -0.426701  
P -1.436294 0.493071 -0.853349  
C -0.430169 0.062592 -2.347231  
C 1.034217 0.456581 -2.130622  
H -0.521964 -1.024053 -2.482809  
H -0.841017 0.556093 -3.242335  
H 1.677275 0.019852 -2.905993  
H 1.138547 1.551202 -2.181791  
C 2.758092 -1.485749 -0.560317  
C 3.817852 -1.608166 0.354488  
C 2.502756 -2.559352 -1.445227  
C 4.614472 -2.753630 0.398936  
H 4.028001 -0.787458 1.043626  
C 3.304084 -3.710360 -1.402262  
C 4.351869 -3.802826 -0.483103  
H 5.433642 -2.821806 1.117720  
H 3.115261 -4.540579 -2.081992  
H 4.965409 -4.706851 -0.462654  
C 2.897598 1.348320 -0.131656  
C 4.013328 1.500185 -0.975574  
C 2.692495 2.270110 0.904000  
C 4.900912 2.559555 -0.782610  
H 4.195728 0.782391 -1.779258  
C 3.583649 3.331119 1.096251  
H 1.831462 2.155741 1.559527  
C 4.687456 3.477563 0.253260  
H 5.765617 2.668760 -1.441824  
H 3.414948 4.042843 1.908400  
H 5.386040 4.304526 0.402721  
C -1.243935 2.309203 -0.702995  
C -1.485952 3.166202 -1.788009  
C -0.812403 2.859940 0.520066  
C -1.297545 4.543150 -1.673836  
H -1.831596 2.743119 -2.734842  
C -0.622112 4.242977 0.641194  
C -0.862515 5.073101 -0.456320  
H -1.489532 5.197811 -2.526338  
H -0.279471 4.684216 1.575869  
H -0.705745 6.149315 -0.351449  
C -3.187870 0.227514 -1.287387  
C -4.166432 0.799914 -0.453667  
C -3.584116 -0.614900 -2.339297  
C -5.519421 0.540040 -0.676756  
H -3.868447 1.457645 0.367792  
C -4.941133 -0.871776 -2.556786  
H -2.842662 -1.079959 -2.992166  
C -5.909176 -0.297443 -1.728043  
H -6.273224 0.993018 -0.028147  
H -5.242002 -1.524645 -3.379829  
H -6.968575 -0.501472 -1.901263  
O 1.463071 -2.409332 -2.306475

O -0.585213 1.988869 1.570201  
C 1.089371 -3.478165 -3.160703  
H 0.211854 -3.131785 -3.723663  
H 1.892462 -3.728776 -3.874992  
H 0.814084 -4.378645 -2.585243  
C -0.500510 2.542553 2.889104  
H -0.470064 1.700873 3.586768  
H 0.413080 3.143913 3.017217  
H -1.385414 3.160927 3.105347  
C -1.951387 -0.682857 2.631759  
C -2.629764 -1.857302 3.337585  
C -2.237256 -3.279737 2.909403  
C -2.550862 -3.716024 1.473591  
C -1.969388 -2.862889 0.330349  
C -0.523189 -2.362873 0.506049  
H -2.169859 0.260968 3.151716  
H -2.378807 -0.575554 1.617535  
H -2.446608 -1.768796 4.423224  
H -3.724154 -1.739112 3.219578  
H -1.161686 -3.433992 3.092411  
H -2.744931 -3.982623 3.592065  
H -3.645818 -3.777395 1.340083  
H -2.177596 -4.750231 1.366894  
H -2.041790 -3.465047 -0.594868  
H -2.652577 -2.017213 0.146162  
H 0.059938 -3.006835 1.188563  
H -0.002010 -2.390588 -0.461767  
C 1.194198 -0.613827 2.727954  
C 0.053006 -0.946203 3.482648  
H 1.685418 0.351306 2.892237  
H 1.846356 -1.420296 2.379564  
H -0.133372 -1.999133 3.687621  
H -0.289006 -0.278968 4.277489

#### <sup>4</sup>TS9-10B-12

Geometry with 85 atoms:

Total energy: -3274.479133530

Cr -0.078596 0.065277 1.162777  
P 1.704219 0.124011 -0.711377  
P -1.571348 0.133684 -0.909151  
C -0.507906 -0.011732 -2.459546  
C 0.786550 0.776151 -2.192467  
H -0.292760 -1.078915 -2.590169  
H -1.054885 0.365760 -3.303558  
H 1.424139 0.790117 -3.088373  
H 0.542949 1.824327 -1.966023  
C 2.445460 -1.453518 -1.319654  
C 2.466588 -1.784411 -2.684456  
C 2.955121 -2.397981 -0.394788  
C 2.951253 -3.015549 -3.137156  
H 2.097128 -1.076426 -3.426862  
C 3.430324 -3.640177 -0.840930  
C 3.425098 -3.943152 -2.203761  
H 2.955283 -3.244399 -4.199416  
H 3.814908 -4.371230 -1.130803  
H 3.802186 -4.913034 -2.537198  
C 3.104394 1.297385 -0.486954  
C 3.094375 2.588539 -1.043727  
C 4.182321 0.921767 0.337553  
C 4.138710 3.481485 -0.782074  
H 2.279178 2.916908 -1.689978  
C 5.223480 1.816635 0.591923  
H 4.205548 -0.073412 0.782869  
C 5.204924 3.100067 0.035956  
H 4.118626 4.479152 -1.227985  
H 6.055515 1.507530 1.229505  
H 6.020851 3.798564 0.236803  
C -2.136715 1.881671 -0.964914  
C -3.233265 2.292520 -1.738487  
C -1.448940 2.844197 -0.194604  
C -3.658356 3.621865 -1.739934  
H -3.769341 1.554173 -2.338910  
C -1.880645 4.176679 -0.181169  
C -2.983024 4.555833 -0.952666  
H -4.515113 3.922850 -2.346285  
H -1.374437 4.927124 0.423731  
H -3.311693 5.597559 -0.931769  
C -3.077330 -0.854526 -1.205700  
C -4.232266 -0.578399 -0.449315  
C -3.083898 -1.946203 -2.090282  
C -5.368269 -1.378462 -0.578424

H -4.250173 0.270240 0.238789  
C -4.224993 -2.744500 -2.214814  
H -2.203089 -2.190798 -2.686634  
C -5.366704 -2.465310 -1.459079  
H -6.258505 -1.151889 0.013208  
H -4.218724 -3.589344 -2.907724  
H -6.256303 -3.091894 -1.557733  
O 2.970416 -2.025484 0.908960  
O -0.340857 2.416460 0.513979  
C 3.277098 -2.978852 1.915864  
H 3.146302 -2.466521 2.878058  
H 2.593177 -3.842733 1.871680  
H 4.321225 -3.326579 1.839958  
C 0.471393 3.409447 1.153869  
H 0.740728 4.207067 0.446442  
H -0.045637 3.838762 2.026800  
H 1.388919 2.908359 1.471497  
C -1.604126 0.527064 2.692454  
C -2.286306 -0.235285 3.819389  
C -2.237231 -1.770018 3.713502  
C -2.659323 -2.314960 2.333342  
C -1.516903 -2.774001 1.401557  
C -0.206542 -1.978670 1.392158  
H -1.708182 -1.615449 2.810150  
H -2.125124 0.267485 1.749822  
H -1.884732 0.082911 4.797772  
H -3.349946 0.072742 3.830863  
H -1.228484 -2.136881 3.968658  
H -2.898581 -2.176037 4.496043  
H -3.267082 -1.552625 1.818970  
H -3.342644 -3.169636 2.464683  
H -1.262085 -3.818397 1.672317  
H -1.922145 -2.837350 0.377941  
H 0.348920 -2.144834 2.331625  
H 0.436141 -2.368484 0.584987  
C 1.525042 0.411923 2.562497  
C 0.450252 0.452209 3.462123  
H 2.065003 1.328419 2.313390  
H 2.102979 -0.504165 2.445505  
H 0.223724 -0.439808 4.047428  
H 0.195171 1.391650 3.958179

#### <sup>4</sup>TS9-10B-13

Geometry with 85 atoms:

Total energy: -3274.478153470  
Cr 0.174324 -0.488551 0.994619  
P 1.620383 0.075057 -0.765205  
P -1.634667 0.439677 -0.874149  
C -0.543659 0.967445 -2.291498  
C 0.692968 0.066176 -2.388536  
H -1.117156 0.973466 -3.231037  
H -0.255125 2.009689 -2.086375  
H 0.390609 -0.970988 -2.598877  
H 1.363314 0.394581 -3.197903  
C 2.944186 -1.170805 -0.971286  
C 2.949527 -2.125074 -1.998271  
C 3.969654 -1.216549 0.006224  
C 3.939349 -3.110666 -2.062506  
H 2.174771 -2.111793 -2.765635  
C 4.963174 -2.202524 -0.057617  
C 4.939133 -3.145559 -1.090077  
H 3.924997 -3.845421 -2.870051  
H 5.754014 -2.241497 0.691046  
H 5.716543 -3.912579 -1.129487  
C 2.458068 1.711571 -0.831302  
C 3.715635 1.876782 -1.435305  
C 1.799459 2.833218 -0.303085  
C 4.300726 3.142880 -1.504648  
H 4.243537 1.014243 -1.848711  
C 2.384461 4.101161 -0.381223  
H 0.826614 2.716960 0.172786  
C 3.637648 4.257700 -0.978733  
H 5.281395 3.260208 -1.972681  
H 1.858970 4.967219 0.029290  
H 4.099105 5.246626 -1.035489  
C -2.426287 1.967931 -0.257588  
C -3.505438 2.572345 -0.920831  
C -1.942297 2.548272 0.935217  
C -4.107039 3.725313 -0.415021  
H -3.885861 2.120351 -1.839898  
C -2.552652 3.698418 1.452872

C -3.629212 4.277668 0.774771  
H -4.945642 4.184291 -0.942484  
H -2.206540 4.150945 2.380554  
H -4.096948 5.173126 1.191038  
C -2.987671 -0.557443 -1.585086  
C -4.188904 -0.703523 -0.865753  
C -2.791978 -1.311942 -2.753689  
C -5.177071 -1.579952 -1.317647  
H -4.357178 -0.127000 0.046893  
C -3.784363 -2.189249 -3.199977  
H -1.862620 -1.231311 -3.321641  
C -4.976912 -2.326177 -2.484017  
H -6.108360 -1.681197 -0.755149  
H -3.622130 -2.768933 -4.111899  
H -5.750589 -3.013247 -2.834838  
O 3.913545 -0.255253 0.956741  
O -0.857733 1.946151 1.540552  
C 4.872955 -0.220388 1.999185  
H 5.892618 -0.069481 1.604983  
H 4.608163 0.634915 2.634681  
H 4.847487 -1.142143 2.606204  
C -0.265819 2.609047 2.662399  
H 0.659929 2.075174 2.897326  
H -0.012567 3.651742 2.415210  
H -0.939024 2.587335 3.533893  
C -1.796862 -0.928637 2.465277  
C -2.242180 -2.192059 3.201399  
C -1.538257 -3.507219 2.832785  
C -1.808790 -4.092024 1.442163  
C -1.511595 -3.193971 0.230072  
C -0.175508 -2.434849 0.256025  
H -2.174326 -0.020954 2.956478  
H -2.232621 -0.930530 1.448969  
H -2.116934 -2.028152 4.286216  
H -3.332288 -2.317511 3.053855  
H -0.449211 -3.385224 2.957708  
H -1.831239 -4.266300 3.578268  
H -2.863383 -4.416261 1.382604  
H -1.205796 -5.013683 1.355421  
H -1.548782 -3.835843 -0.669340  
H -2.351721 -2.496408 0.089185  
H 0.590601 -2.975012 0.841265  
H 0.227090 -2.362704 -0.768474  
C 1.334954 -0.553502 2.508938  
C 0.222614 -0.744055 3.344023  
H 1.830326 0.419879 2.451701  
H 1.970728 -1.406805 2.259672  
H 0.072383 -1.719567 3.802667  
H -0.147717 0.088253 3.947245

#### <sup>4</sup>TS9-10B-14

Geometry with 85 atoms:

Total energy: -3274.478845890  
Cr 0.238141 -0.643622 0.939364  
P 1.611787 -0.006319 -0.752088  
P -1.590774 0.514081 -0.845908  
C -0.522366 0.078020 -2.338391  
C 0.697554 -0.061157 -2.379838  
H -1.122638 0.782935 -3.256430  
H -0.207493 1.922710 -2.257930  
H 0.378372 -1.102776 -2.538964  
H 1.376477 0.217491 -3.200719  
C 2.962969 -1.227058 -0.925064  
C 3.024109 -2.176760 -1.954550  
C 3.952550 -1.255026 0.089224  
C 4.035431 -3.142327 -1.984678  
H 2.277394 -2.175720 -2.749546  
C 4.965766 -2.223929 0.060794  
C 4.998083 -3.161837 -0.974908  
H 4.066020 -3.874199 -2.794404  
H 5.728466 -2.249928 0.838766  
H 5.790671 -3.914109 -0.987242  
C 2.442504 1.633640 -0.836200  
C 1.816741 2.752565 -0.267085  
C 3.671878 1.800275 -1.496635  
C 2.401711 4.019289 -0.360306  
H 0.868482 2.634841 0.250477  
C 4.258249 3.064871 -1.581935  
H 4.178473 0.940463 -1.941250  
C 3.625584 4.177359 -1.015130  
H 1.897797 4.881778 0.083294

H 5.216176 3.182652 -2.094807  
H 4.087763 5.165106 -1.085246  
C -2.062117 2.134174 -0.146708  
C -2.947440 3.005359 -0.800744  
C -1.522681 2.516545 1.101615  
C -3.304292 4.229004 -0.233748  
H -3.370774 2.709062 -1.763705  
C -1.887390 3.739386 1.679557  
C -2.775446 4.585116 1.008773  
H -3.993952 4.896320 -0.754486  
H -1.490759 4.044680 2.646094  
H -3.052792 5.535362 1.471296  
C -3.135507 -0.245674 -1.446741  
C -4.349218 -0.036918 -0.766801  
C -3.085573 -1.187159 -2.490023  
C -5.492376 -0.749732 -1.135662  
H -4.406282 0.683196 0.052024  
C -4.232128 -1.898714 -2.851874  
H -2.151191 -1.378052 -3.023593  
C -5.436936 -1.682601 -2.175806  
H -6.431375 -0.575733 -0.604604  
H -4.182456 -2.626199 -3.665676  
H -6.332224 -2.240602 -2.460195  
O 3.843174 -0.295986 1.037824  
O -0.614031 1.660228 1.695976  
C 4.777310 -0.233714 2.101587  
H 4.487343 0.627981 2.717651  
H 4.748256 -1.147233 2.720789  
H 5.804015 -0.074008 1.729559  
C 0.041019 2.092223 2.894912  
H 0.803800 3.142235 3.125116  
H 0.539573 3.061702 2.741090  
H -0.673449 2.163455 3.729633  
H -1.906964 -0.975933 2.435557  
C -2.760444 -2.232903 2.576747  
C -3.080389 -2.976168 1.266970  
C -2.121508 -4.102656 0.868261  
C -0.632770 -3.743685 0.782351  
C -0.304377 -2.489696 -0.036377  
H -2.013447 -0.320229 3.380878  
H -2.305949 -0.380939 1.591080  
H -2.318126 -2.930976 3.311999  
H -3.715408 -1.914903 3.034315  
H -4.090279 -3.412163 1.345570  
H -3.145792 -2.241863 0.448274  
H -2.448320 -4.485770 -0.115352  
H -2.239434 -4.944913 1.573857  
H -0.208386 -3.674387 1.798336  
H -0.112152 -4.611778 0.334912  
H 0.712938 -2.593705 -0.447316  
H -0.992836 -2.414802 -0.898059  
C 1.214909 -1.224001 2.384313  
C 0.075644 -1.423953 3.189244  
H 1.863487 -0.364182 2.571683  
H 1.710370 -2.082639 1.921812  
H -0.274222 -2.437255 3.390699  
H -0.101634 -0.729681 4.013698

#### <sup>4</sup>TS9-10B-15

Geometry with 85 atoms:

Total energy: -3274.478913310  
Cr 0.155815 -0.748822 1.062071  
P -1.673557 0.590658 -0.493210  
P 1.607880 0.501467 -0.595289  
C 0.642523 1.415730 -1.903059  
C -0.744128 0.795752 -2.101573  
H 0.559058 2.458180 -1.570574  
H 1.204709 1.399434 -2.849273  
H -1.342866 1.397688 -2.802113  
H -0.641581 -0.213571 -2.526934  
C -2.402914 2.267680 -0.197114  
C -3.750485 2.546787 -0.476767  
C -1.596764 3.313575 0.318203  
C -4.299053 3.810510 -0.242180  
H -4.390706 1.764156 -0.886049  
C -2.146094 4.580557 0.557205  
C -3.493980 4.822793 0.278922  
H -5.350739 3.997580 -0.469121  
H -1.528163 5.383728 0.956935  
H -3.909103 5.815445 0.469785  
C -3.135146 -0.427552 -0.950099



|                                 |                                 |                                 |
|---------------------------------|---------------------------------|---------------------------------|
| C -4.053640 -0.748715 0.068965  | C 4.186610 -2.993452 -2.281018  | C -0.906046 -0.157650 -2.291370 |
| C -3.351983 -0.946308 -2.238011 | H 2.329631 -2.144684 -2.945319  | H 0.267540 1.653892 -2.178643   |
| C -5.150426 -1.572059 -0.190091 | C 5.081608 -2.130064 -0.195516  | H 0.993366 0.404090 -3.210555   |
| H -3.923496 -0.334805 1.072064  | C 5.174402 -2.988643 -1.295643  | H -1.542132 0.212810 -3.110491  |
| C -4.447522 -1.778466 -2.493553 | H 4.261709 -3.666200 -3.137780  | H -0.753239 -1.235111 -2.422513 |
| H -2.675545 -0.708797 -3.059932 | H 5.862832 -2.139697 0.564522   | C -2.346050 1.840697 -0.789212  |
| C -5.345896 -2.097055 -1.472357 | H 6.032486 -3.660450 -1.376092  | C -3.528194 2.201864 -1.451656  |
| H -5.854073 -1.805508 0.612631  | C 2.212101 1.552716 -0.764860   | C -1.553048 2.852030 -0.202642  |
| H -4.600446 -2.173095 -3.501145 | C 2.280649 2.224168 0.465116    | C -3.931615 3.536145 -1.530524  |
| H -6.200932 -2.746282 -1.675597 | C 2.660366 2.205959 -1.924899   | H -4.147092 1.422315 -1.901958  |
| C 2.321402 -0.907788 -1.531789  | C 2.772397 3.529042 0.535733    | C -1.955850 4.191871 -0.278335  |
| C 3.592895 -0.889515 -2.118193  | H 1.954261 1.713693 1.370246    | C -3.141778 4.523968 -0.940742  |
| C 1.538423 -2.075397 -1.633471  | C 3.150260 3.512976 -1.853995   | H -4.856942 3.799962 -2.046758  |
| C 4.076249 -2.002513 -2.811893  | H 2.640960 1.698928 -2.891944   | H -1.362274 4.984367 0.174094   |
| H 4.212194 0.005846 -2.026035   | C 3.203466 4.178211 -0.625085   | H -3.445742 5.572341 -0.989410  |
| C 2.011396 -3.189606 -2.332456  | H 2.816638 4.042909 1.499246    | C -3.290232 -0.923747 -0.719659 |
| C 3.281069 -3.144045 -2.919436  | H 3.494591 4.012428 -2.762984   | C -3.435975 -2.010329 -1.598861 |
| H 5.070030 -1.976363 -3.263688  | H 3.584497 5.201065 -0.572394   | C -4.301888 -0.667846 0.225679  |
| H 1.416596 -4.098295 -2.413893  | C -1.549800 2.144992 0.009748   | C -4.572946 -2.822879 -1.532166 |
| H 3.647997 -4.020759 -3.458341  | C -2.080548 3.258426 -0.661757  | H -2.672060 2.235111 -1.432414  |
| C 3.015467 1.587788 -0.177028   | C -0.977348 2.325003 1.284238   | C -5.435053 -1.479766 0.285293  |
| C 3.701404 1.362340 1.030448    | C -2.040460 4.530871 -0.094590  | H -4.208555 0.177983 0.909855   |
| C 3.415042 2.651900 -1.004513   | H -2.538446 3.116858 -1.644435  | C -5.572042 -2.561953 -0.591470 |
| C 4.767292 2.185679 1.400674    | C -0.935182 3.603005 1.859434   | H -4.676637 -3.661968 -2.224530 |
| H 3.404081 0.540734 1.684755    | C -1.463200 4.694681 1.166767   | H -6.215066 -1.266638 1.020194  |
| C 4.478090 3.477064 -0.626121   | H -2.456438 5.386420 -0.630397  | H -6.458910 -3.198338 -0.542658 |
| H 2.903952 2.846818 -1.948981   | H -0.488440 3.265347 2.838639   | C 2.513389 -1.345190 -1.432410  |
| C 5.154813 3.246592 0.575491    | H -1.419657 5.685012 1.626152   | C 3.873470 -1.228713 -1.758000  |
| H 5.293677 2.000063 2.340029    | C -3.320830 0.194202 -1.187685  | C 1.898183 -2.615338 -1.553643  |
| H 4.780003 4.302201 -1.275875   | C -3.702334 -0.482969 -2.358032 | C 4.617312 -2.336184 -2.175137  |
| H 5.985512 3.893226 0.868525    | C -4.303571 0.525122 -0.235845  | H 4.366901 -2.058786 -1.682545  |
| O -0.287080 3.020437 0.545060   | C -5.042597 -0.814303 -2.575110 | C 2.644037 -3.728638 -1.963102  |
| O 0.306222 -2.054380 -0.999317  | H -2.961806 -0.768206 -3.108379 | C 4.000006 -3.583481 -2.270097  |
| C 0.590123 4.010954 1.066337    | C -5.640654 0.189844 -0.457385  | H 5.674424 -2.219265 -2.422884  |
| H 0.241700 4.385172 2.043578    | H -4.027138 1.053715 0.679768   | H 2.173810 -4.707621 -2.051182  |
| H 1.563806 3.522402 1.194757    | C -6.013720 -0.481462 -1.626392 | H 4.571394 -4.458056 -2.590816  |
| H 0.701032 4.856757 0.366791    | C -5.326951 -1.338398 -3.490773 | C 2.742764 1.442443 -0.683005   |
| C -0.636558 -3.080255 -1.335016 | H -6.395047 0.456421 0.286775   | C 2.754956 2.577393 -1.510834   |
| H -1.586505 -2.808360 -0.862709 | H -7.060394 -0.743763 -1.798030 | C 3.679135 1.362908 0.366715    |
| H -0.780189 -3.125925 -2.425330 | O 3.798918 -0.403156 0.947286   | C 3.667668 3.612815 -1.282338   |
| H -0.307044 -4.059681 -0.957599 | O -0.464539 1.212147 1.928187   | H 2.058337 2.671396 -2.344966   |
| C -1.335245 -1.925542 2.084921  | C 4.731066 -0.349836 2.011617   | C 4.592671 2.394882 0.589264    |
| C -1.335138 -2.970188 3.192820  | H 4.367054 0.421716 2.703507    | C 3.707078 0.479089 1.007341    |
| C -0.018076 -3.728527 3.425901  | H 4.792883 -1.313835 2.545986   | C 4.584049 3.528456 -0.230771   |
| C 0.636359 -4.247025 2.130104   | H 5.735636 -0.061071 1.658149   | H 3.664298 4.487751 -1.937325   |
| C 1.810855 -3.403395 1.584041   | C -0.077751 1.365117 3.299040   | H 5.313756 2.312544 1.406290    |
| C 1.764231 -1.878679 1.760037   | H 0.800220 2.023806 3.391050    | H 5.295252 4.339191 -0.055214   |
| H -2.333474 -1.486689 1.973228  | H -0.911095 1.767069 3.895342   | O -0.392356 2.456987 0.430541   |
| H -1.113720 -2.435682 1.122330  | H 0.180250 0.372849 3.676339    | O 0.570568 -2.667657 -1.272173  |
| H -1.678630 -2.517352 4.139480  | C -1.851611 -1.476038 2.279011  | C 0.456477 3.475968 0.971464    |
| H -2.115531 -3.713193 2.935077  | C -2.651806 -2.740946 2.557092  | H 1.351918 2.977770 1.354204    |
| H 0.694824 -3.093604 3.977870   | C -2.679666 -3.801574 1.439863  | H 0.763232 4.185472 0.188921    |
| H -0.237303 -4.572497 4.099800  | C -2.918991 -3.235897 0.023535  | H -0.046582 4.012144 1.792354   |
| H -0.148022 -4.350188 1.359183  | C -1.662776 -3.147667 -0.869091 | C -0.105024 -3.915671 -1.231920 |
| H 1.008640 -5.272177 2.288099   | O -0.356476 -2.700089 -0.208584 | H -1.130423 -3.700146 -0.906831 |
| H 2.733552 -3.759606 2.083230   | H -1.924237 -0.766551 3.114656  | H -0.130348 -4.392497 -2.226999 |
| H 1.957145 -3.655481 0.519818   | H -2.310883 -0.965631 1.410248  | O 0.360925 -4.603394 -0.506520  |
| H 1.840308 -1.622072 2.830474   | H -2.3214193 -3.208572 3.499252 | C 1.279761 0.557043 2.824832    |
| H 2.672473 -1.465348 1.288077   | H -3.694964 -2.424036 2.751944  | C 2.119416 -0.713868 2.987384   |
| C 0.341495 0.721058 2.630107    | H -1.744183 -4.385709 1.452188  | C 1.688061 -1.660193 4.122989   |
| C -0.519300 -0.162483 3.276364  | H -3.472658 -4.523290 1.693798  | C 0.816049 -2.850514 3.706587   |
| H -0.053305 1.632599 2.182681   | H -3.392389 -2.243628 0.101431  | C -0.539087 -2.548066 3.055754  |
| H 1.407856 0.714147 2.868499    | H -3.660136 -3.857368 -0.504527 | C -0.487662 -1.955370 1.645914  |
| H -0.122140 -0.862580 4.012482  | H -1.490003 -4.151711 -1.306312 | H 1.679293 1.192307 2.015980    |
| H -1.573860 0.093242 3.399937   | H -1.897229 -2.499267 -1.731810 | H 1.395100 1.160475 3.731302    |
|                                 | H -0.041064 -3.454262 0.530678  | H 2.195269 -1.281169 2.044473   |
|                                 | H 0.447648 -2.701731 -0.965257  | H 3.149792 -0.365620 3.195197   |
|                                 | C 1.293085 -1.662432 2.204484   | H 2.594350 -2.069176 4.599708   |
|                                 | C 0.170797 -2.177907 2.870769   | H 1.180207 -1.079429 4.913666   |
|                                 | H 1.836246 -0.808603 2.619048   | H 0.642619 -3.470967 4.603130   |
|                                 | H 1.881871 -2.313434 1.553238   | H 1.399605 -3.484238 3.012130   |
|                                 | H -0.109500 -3.219073 2.704568  | H -1.086467 -3.509184 3.001260  |
|                                 | H -0.108528 -1.799014 3.856515  | H -1.149526 -1.925482 3.735141  |

<sup>4</sup>TS9-10B-16

Geometry with 85 atoms:

Total energy: -3274.479190040  
 Cr -0.231214 -0.930370 0.870846  
 P 1.534385 -0.158861 -0.812448  
 P -1.564715 0.485013 -0.766507  
 C -0.618614 0.720662 -2.363981  
 C 0.602991 -0.205682 -2.422774  
 H -1.282833 0.546265 -3.222077  
 H -0.309184 1.775425 -2.406579  
 H 0.282282 -1.247408 -2.569365  
 H 1.253975 0.057842 -3.269739  
 C 2.975747 -1.256827 -1.075272  
 C 3.093324 -2.128705 -2.166694  
 C 3.984196 -1.266822 -0.080379

<sup>4</sup>TS9-10B-17

Geometry with 85 atoms:

Total energy: -3274.480642400  
 Cr -0.209387 0.052938 1.275803  
 P -1.779014 0.099433 -0.672413  
 P 1.514334 0.081227 -0.820724  
 C 0.441353 0.571606 -2.273447

<sup>4</sup>TS9-10B-18

Geometry with 85 atoms:

Total energy: -3274.479317090

Cr 0.190397 -0.735528 1.047058  
P 1.616639 0.511755 -0.634086  
P -1.673444 0.649361 -0.493104  
C -0.741777 0.904841 -2.092792  
C 0.652846 1.501176 -1.881731  
H -0.653584 -0.090475 -2.554164  
H -1.334190 1.538012 -2.770900  
H 1.204945 1.521769 -2.833953  
H 0.585463 2.527997 -1.500505  
C 2.253858 -0.895766 -1.630377  
C 3.494264 -0.888591 -2.279925  
C 1.458779 -2.059245 -1.688152  
C 3.937708 -2.010385 -2.986172  
H 4.122185 0.004089 -2.224581  
C 1.895658 -3.185365 -2.390488  
C 3.136541 -3.151788 -3.037140  
H 4.907016 -1.992570 -3.488697  
H 1.294405 -4.092845 -2.431922  
H 3.475966 -4.037183 -3.579920  
C 3.074382 1.527169 -0.211261  
C 3.458443 2.647947 -0.967514  
C 3.815252 1.184501 0.935007  
C 4.561181 3.414645 -0.578919  
H 2.905170 2.933509 -1.863922  
C 4.919150 1.950740 1.315430  
H 3.530652 0.315641 1.531549  
C 5.291561 3.069212 0.561999  
H 4.850971 4.284911 -1.172949  
H 5.487805 1.675223 2.206869  
H 6.152374 3.670910 0.863741  
C -2.386938 2.316010 -0.126578  
C -3.732714 2.623616 -0.380497  
C -1.562321 3.323588 0.433091  
C -4.262010 3.881667 -0.079079  
H -4.385060 1.868401 -0.821453  
C -2.091825 4.584005 0.739775  
C -3.439007 4.856258 0.484629  
H -5.312820 4.093969 -0.287181  
H -1.459821 5.357560 1.174536  
H -3.839937 5.843316 0.727789  
C -3.137844 -0.340358 -1.002174  
C -4.041365 -0.737065 0.003250  
C -3.368920 -0.770839 -2.320281  
C -5.136456 -1.548670 -0.297491  
H -3.900170 -0.392429 1.030168  
C -4.462863 -1.590631 -2.618283  
H -2.706211 -0.472187 -3.133612  
C -5.345869 -1.985296 -1.610159  
H -5.828092 -1.841363 0.496221  
H -4.627036 -1.915769 -3.648696  
H -6.199394 -2.625146 -1.846930  
O 0.250501 -2.021223 -1.009338  
O -0.256583 2.997160 0.632101  
C -0.730702 -3.017676 -1.326235  
H -0.886298 -3.068206 -2.414462  
H -0.433722 -4.005105 -0.941326  
H -1.666458 -2.707306 -0.849088  
C 0.646318 3.946171 1.182885  
H 0.758308 4.824103 0.523909  
H 0.324619 4.278048 2.184476  
H 1.613719 3.435647 1.266794  
C -1.348319 -1.839545 2.113926  
C -1.460707 -2.958956 3.141259  
C -0.592663 -4.196396 2.891485  
C 0.934150 -4.036044 2.946394  
C 1.637737 -3.444176 1.709331  
C 1.797955 -1.920642 1.642953  
H -2.269981 -1.249120 2.071339  
H -1.231147 -2.310057 1.113217  
H -1.274821 -2.579492 4.162226  
H -2.514457 -3.293775 3.155737  
H -0.882374 -4.949537 3.644115  
H -0.868312 -4.637290 1.914427  
H 1.350736 -5.044642 3.107470  
H 1.217313 -3.457619 3.845577  
H 2.652745 -3.883988 1.675209  
H 1.144251 -3.826875 0.796423

H 2.163503 -1.548412 2.616930  
H 2.592804 -1.695523 0.912373  
C 0.454196 0.651892 2.645566  
C -0.276744 -0.325716 3.330780  
H -0.041661 1.575747 2.346446  
H 1.540243 0.696778 2.758734  
H 0.253202 -1.077208 3.918095  
H -1.287247 -0.104789 3.681181

<sup>4</sup>TS9-10B-19

Geometry with 85 atoms:

Total energy: -3274.477985440

Cr -0.244308 -0.649755 1.003502  
P 1.673494 0.061423 -0.629370  
P -1.546652 0.296272 -0.911894  
C -0.529211 0.085685 -2.445720  
C 0.877299 0.658736 -2.228703  
H -0.489691 -0.996025 -2.654085  
H -1.017953 0.573525 -3.303818  
H 1.528440 0.388616 -3.071558  
H 0.826615 1.756096 -2.203567  
C 3.100970 -0.939980 -1.237888  
C 3.984351 -0.332852 -2.148974  
C 3.363125 -2.265372 -0.821048  
C 5.085039 -1.013670 -2.665784  
H 3.810605 0.702920 -2.452585  
C 4.471465 -2.954631 -1.347308  
C 5.319030 -2.331240 -2.262440  
H 5.755075 -0.519405 -3.372118  
H 4.679295 -3.978372 -1.037936  
H 6.176023 -2.882857 -2.656926  
C 2.545998 1.529622 0.072292  
C 2.179279 2.859090 -0.184712  
C 3.577625 1.278586 0.997747  
C 2.828929 3.913701 0.466975  
H 1.379392 3.096733 -0.886027  
C 4.221352 2.331641 1.649145  
H 3.887365 0.250780 1.202468  
C 3.848152 3.655154 1.386533  
H 2.531205 4.942608 0.249967  
H 5.023199 2.117877 2.360194  
H 4.355630 4.480035 1.892488  
C -1.561474 2.105677 -0.622377  
C -2.148186 2.984809 -1.547008  
C -0.977972 2.630446 0.549662  
C -2.156010 4.361667 -1.328770  
H -2.615053 2.574400 -2.446291  
C -0.990443 4.014916 0.776409  
C -1.575500 4.867466 -0.162282  
H -2.614786 5.033267 -2.057164  
H -0.537124 4.442222 1.668550  
H -1.574848 5.943509 0.027703  
C -3.273873 -0.097382 -1.351503  
C -4.296076 0.336899 -0.487009  
C -3.604671 -0.883672 -2.467037  
C -5.624405 -0.009689 -0.737381  
H -4.054797 0.954955 0.381750  
C -4.937284 -1.229602 -2.711438  
H -2.831188 -1.238361 -3.150855  
C -5.947494 -0.796496 -1.848485  
H -6.410850 0.335448 -0.061872  
H -5.184943 -1.840493 -3.582913  
H -6.987643 -1.069031 -2.042545  
O 2.526389 -2.807534 0.090544  
O -0.395815 1.744217 1.430913  
C 2.667064 -4.166767 0.471560  
H 1.845955 -4.377454 1.168515  
H 2.578760 -4.841917 -0.396630  
H 3.627513 -4.349327 0.983467  
C 0.119001 2.267301 2.662559  
H 0.975379 2.932403 2.475762  
H -0.669028 2.799949 3.217239  
H 0.453354 1.414053 3.257814  
C -1.831462 -0.758793 2.547501  
C -2.647121 -1.868458 3.194534  
C -2.722111 -3.190628 2.410903  
C -3.074873 -3.020988 0.917850  
C -1.899079 -3.184762 -0.065602  
C -0.546018 -2.570710 0.306865  
H -1.853256 0.165062 3.142355  
H -2.306301 -0.512073 1.579068

H -2.286300 -2.065566 4.219662  
H -3.678825 -1.486246 3.320515  
H -1.770844 -3.740840 2.508406  
H -3.474573 -3.825688 2.905895  
H -3.546683 -2.036340 0.764394  
H -3.850786 -3.750263 0.633614  
H -1.737442 -4.270711 -0.220553  
H -2.226760 -2.806009 -1.048296  
H -0.077048 -3.151546 1.119134  
H 0.141183 -2.660751 -0.550931  
C 1.280208 -1.023099 2.481496  
C 0.155891 -1.358469 3.252035  
H 1.824043 -0.097178 2.690878  
H 1.857416 -1.808186 1.990156  
H -0.127571 -2.409257 3.336189  
H -0.105067 -0.760161 4.128178

<sup>4</sup>TS9-10B-20

Geometry with 85 atoms:

Total energy: -3274.476021460  
Cr -0.354701 -0.483848 1.105634  
P 1.708735 -0.093707 -0.434797  
P -1.357224 0.579115 -0.934529  
C -0.349973 0.114227 -2.414171  
C 1.129377 0.414049 -2.154932  
H -0.501559 -0.961676 -2.573285  
H -0.707339 0.648125 -3.308995  
H 1.759436 -0.068415 -2.914069  
H 1.302722 1.498957 -2.211334  
C 2.806072 -1.556729 -0.621212  
C 3.973045 -1.654909 0.152775  
C 2.433616 -2.654759 -1.431618  
C 4.761022 -2.808348 0.130400  
H 4.272130 -0.816285 0.784893  
C 3.222993 -3.813213 -1.453161  
C 4.380644 -3.883990 -0.673281  
H 5.666139 -2.862292 0.738850  
H 2.942439 -4.661198 -2.077497  
H 4.987280 -4.792507 -0.700207  
C 2.902918 1.248187 -0.029231  
C 3.796760 1.724522 -1.006678  
C 2.951525 1.799064 1.259193  
C 4.702038 2.742028 -0.701068  
H 3.797718 1.295804 -2.011484  
C 3.862115 2.815627 1.565803  
H 2.281556 1.429774 2.032353  
C 4.734698 3.292776 0.585271  
H 5.389861 3.103548 -1.469413  
H 3.890708 3.231942 2.576016  
H 5.445237 4.088340 0.822490  
C -1.082131 3.278499 -0.750663  
C -1.353551 3.277649 -1.794597  
C -0.551059 2.872600 0.459248  
C -1.099338 4.641286 -1.654550  
H -1.777305 2.898135 -2.728222  
C -0.294446 4.243086 0.603970  
C -0.566491 5.114893 -0.452562  
H -1.316160 5.329256 -2.474216  
H 0.124315 4.641278 1.526471  
H -0.357725 6.180124 -0.327446  
C -3.113347 0.370209 -1.374837  
C -3.527685 -0.546180 -2.356853  
C -4.082754 1.044755 -0.608585  
C -4.890072 -0.773812 -2.573667  
H -2.795554 -1.086812 -2.960307  
C -5.441143 0.812912 -0.830748  
H -3.775291 1.758898 0.160041  
C -5.847693 -0.097217 -1.812908  
H -5.203170 -1.482863 -3.343868  
H -6.186345 1.345530 -0.234815  
H -6.911440 -0.277695 -1.985554  
O 1.297461 -2.508068 -2.160496  
O -0.300891 1.965784 1.469799  
C 0.727787 -3.630881 -2.811924  
H -0.223021 -3.291713 -3.245395  
H 1.373510 -4.001839 -3.626131  
H 0.524631 -4.450079 -2.101354  
C -0.104608 2.477224 2.792706  
H -0.967995 3.085559 3.105996  
H -0.011211 1.611079 3.455215  
H 0.815746 3.075685 2.860569

C -2.151093 -0.441370 2.352303  
C -3.107640 -1.255653 3.210093  
C -3.162197 -2.377022 2.957511  
C -2.900995 -3.271654 1.522570  
C -1.416707 -3.492046 1.146477  
C -0.688849 -2.392633 0.368116  
H -2.182567 0.622161 2.634414  
H -2.507426 -0.522392 1.309303  
H -2.912366 -1.076276 4.282231  
H -4.115596 -0.836581 3.029651  
H -2.454477 -3.297458 3.626100  
H -4.157769 -3.123443 3.280439  
H -3.385321 -2.604473 0.786034  
H -3.417644 -4.239632 1.419331  
H -0.850216 -3.753453 2.058501  
H -1.365769 -4.407904 0.525709  
H 0.335334 -2.737049 0.153620  
H -1.186410 -2.260395 -0.610416  
C 0.948200 -1.029597 2.727895  
C -0.290339 -1.124648 3.381130  
H 1.615601 -0.195744 2.963721  
H 1.440194 -1.939842 2.371346  
H -0.725828 -2.109476 3.538293  
H -0.565657 -0.390788 4.143356

<sup>4</sup>Ts9-10B-21

Geometry with 85 atoms:

Total energy: -3274.478210080  
Cr -0.541991 -0.990647 0.973948  
P 1.572922 -0.456933 -0.358463  
P -1.402062 0.463592 -0.906289  
C -0.275383 0.454969 -2.393839  
C 1.039406 -0.300958 -2.136957  
H -0.807433 -0.006362 -3.237032  
H -0.095646 1.502795 -2.671842  
H 0.927234 -1.353867 -2.440434  
H 1.869565 0.114952 -2.724961  
C 3.000145 -1.600822 -0.502283  
C 2.924141 -2.906504 0.003785  
C 4.187926 -1.194366 -1.166069  
C 4.003039 -3.788750 -0.096448  
H 2.002146 -3.245243 0.475037  
C 5.279158 -2.072534 -1.246140  
C 5.180710 -3.359624 -0.710268  
H 3.921648 -4.800827 0.304954  
H 6.200885 -1.763915 -1.739151  
H 6.036858 -4.034705 -0.786942  
C 2.290131 1.149898 0.161926  
C 2.208985 2.316819 -0.611896  
C 2.891538 1.210525 1.430088  
C 2.714664 3.524223 -0.122628  
H 1.758341 2.296523 -1.604576  
C 3.408398 2.415612 1.912067  
H 2.968965 0.306848 2.040852  
C 3.315077 3.578024 1.138568  
H 2.638424 4.427494 -0.732686  
H 3.886221 2.446771 2.894637  
H 3.713088 4.522693 1.517010  
C -1.219758 2.162666 -0.237033  
C -1.522279 3.279628 -1.032491  
C -0.752391 2.364293 1.076253  
C -1.355056 4.576532 -0.551018  
H -1.905852 3.123617 -2.044245  
C -0.580546 3.667957 1.564579  
C -0.879258 4.761082 0.749745  
H -1.597039 5.434578 -1.181453  
H -0.201768 3.847999 2.568342  
H -0.736915 5.769903 1.144428  
C -3.131813 0.415642 -1.502097  
C -4.132510 0.947765 -0.666357  
C -3.509871 -0.255808 -2.676419  
C -5.480525 0.807274 -1.000239  
H -3.859196 1.479832 0.247835  
C -4.861027 -0.389747 -3.008232  
H -2.760494 -0.688899 -3.341494  
C -5.848681 0.136245 -2.170885  
H -6.246507 1.226052 -0.343025  
H -5.140954 -0.912385 -3.926032  
H -6.904088 0.025500 -2.431000  
O 4.180693 0.041769 -1.710824  
O -0.476669 1.249756 1.842393

C 5.368245 0.596040 -2.252270  
H 5.118586 1.623675 -2.548539  
H 6.178182 0.626034 -1.503389  
H 5.710980 0.037538 -3.140578  
C -0.177391 1.463403 3.227889  
H 0.787162 1.980123 3.342287  
H -0.980218 2.039961 3.711999  
H -0.116013 0.481378 3.701498  
C -2.411024 -1.126721 2.137992  
C -3.423322 -2.228048 2.417092  
C -3.455814 -3.391747 1.409466  
C -3.455880 -2.948992 -0.069000  
C -2.111787 -3.105107 -0.810696  
C -0.818291 -2.762969 -0.060450  
H -2.465511 -0.325874 2.888813  
H -2.676485 -0.656749 1.172720  
H -3.287186 -2.628093 3.437653  
H -4.424961 -1.755484 2.425073  
H -2.608624 -4.074222 1.592820  
H -4.357256 -3.988310 1.623555  
H -3.796045 -1.902641 -0.135694  
H -4.211324 -3.523691 -0.628913  
H -2.031340 -4.158622 -1.145619  
H -2.167324 -2.515888 -1.742302  
H -0.620207 -3.522705 0.716346  
H 0.021402 -2.845189 -0.772927  
C 0.654368 -1.816112 2.597813  
C -0.624416 -2.078571 3.102494  
H 1.262893 -1.016364 3.030912  
H 1.217655 -2.629785 2.141387  
H -1.046471 -3.075382 2.968323  
H -0.996127 -1.552933 3.984067

<sup>4</sup>Ts9-10B-22

Geometry with 85 atoms:

Total energy: -3274.479280310  
Cr -0.205966 -0.922939 0.899769  
P 1.717338 -0.007073 -0.570150  
P -1.403059 0.369855 -0.878782  
C -0.414931 0.409256 -2.465635  
C 1.044099 -0.072206 -2.303689  
H -0.926381 -0.228700 -3.198830  
H -0.460388 1.436837 -2.854762  
H 1.121931 -1.140442 -2.558053  
H 1.719289 0.464717 -2.987147  
C 3.415974 -0.703899 -0.749211  
C 4.538486 0.128158 -0.892484  
C 3.610522 -2.106462 -0.760401  
C 5.823601 -0.401969 -1.026781  
H 4.411052 1.211366 -0.897833  
C 4.901909 -2.640096 -0.887063  
C 5.999626 -1.786221 -1.017782  
H 6.679724 0.266916 -1.136383  
H 5.056766 -3.718491 -0.887452  
H 7.000226 -2.214453 -1.116434  
C 2.066234 1.759804 -0.210460  
C 1.816915 2.799729 -1.117579  
C 2.601127 2.072074 1.052831  
C 2.092595 4.126035 -0.768210  
H 1.408158 2.590720 -2.106517  
C 2.889180 3.393581 1.394703  
H 2.809009 1.272350 1.768281  
C 2.630355 4.425908 0.485019  
H 1.885721 4.925976 -1.482781  
H 3.318161 3.620314 2.374072  
H 2.849128 5.462038 0.754223  
C -1.370392 2.096103 -0.257581  
C -1.865727 3.152391 -1.037455  
C -0.870153 2.371855 1.030757  
C -1.858538 4.463711 -0.565486  
H -2.273476 2.935939 -2.028564  
C -0.869172 3.687832 1.513263  
C -1.357751 4.722135 0.712823  
H -2.245964 5.275155 -1.184907  
H -0.478676 3.922196 2.501252  
H -1.344377 5.743314 1.100999  
C -3.166946 0.139573 -1.322853  
C -4.129044 0.543504 -0.376430  
C -3.593538 -0.512936 -2.490447  
C -5.485181 0.300127 -0.597750  
H -3.819956 1.057854 0.536814

C -4.953754 -0.752838 -2.708373  
H -2.876309 -0.848994 -3.241055  
C -5.901625 -0.350159 -1.764289  
H -6.220074 0.621671 0.144167  
H -5.271001 -1.259320 -3.623116  
H -6.963489 -0.540800 -1.937374  
O 2.494995 -2.865871 -0.655223  
O -0.388126 1.314052 1.775786  
C 2.594065 -4.281764 -0.642589  
H 1.567547 -4.659549 -0.558016  
H 3.042564 -4.664318 -1.575300  
H 3.183428 -4.637250 0.220102  
C -0.030226 1.567523 3.139213  
H 0.801897 2.283631 3.199330  
H -0.896515 1.947447 3.702691  
H 0.289018 0.614485 3.570823  
C -1.818539 -1.333697 2.355248  
C -2.662349 -2.532352 2.762638  
C -2.766045 -3.669969 1.732815  
C -3.081516 -3.196113 2.299090  
C -1.880891 -3.188547 -0.665894  
C -0.529805 -2.676788 -0.153181  
H -1.847035 -0.548094 3.122409  
H -2.269084 -0.893136 1.444363  
H -2.313413 -2.937717 3.729140  
H -3.685108 -2.156636 2.960352  
H -1.836127 -4.264116 1.730193  
H -3.549231 -4.361682 2.083088  
H -3.532627 -2.190090 0.336189  
H -3.861193 -3.837687 0.142750  
H -1.726533 -4.229583 -1.015647  
H -2.175654 -2.630399 -1.569987  
H -0.087535 -3.410432 0.542157  
H 0.168198 -2.617898 -1.002285  
C 1.300617 -1.628934 2.270149  
C 0.154419 -2.093676 2.937980  
H 1.870784 -0.794605 2.692781  
H 1.863601 -2.306892 1.624647  
H -0.148637 -3.131973 2.792993  
H -0.104948 -1.690357 3.917113

<sup>4</sup>Ts9-10B-23

Geometry with 85 atoms:

Total energy: -3274.475694510  
Cr -0.537285 -0.772627 0.897495  
P 1.606673 -0.339171 -0.403669  
P -1.404285 0.565254 -1.055614  
C -0.152918 0.728552 -2.437928  
C 1.125911 -0.088437 -2.191223  
H -0.622910 0.429567 -3.386243  
H 0.066854 1.800939 -2.533741  
H 0.985854 -1.122702 -2.546040  
H 1.981599 0.329316 -2.739514  
C 2.977511 -1.548078 -0.509234  
C 2.863949 -2.804891 0.101524  
C 4.174429 -1.228499 -1.202950  
C 3.905038 -3.735319 0.047057  
H 1.944905 -3.057488 0.628840  
C 5.223593 -2.158604 -1.248175  
C 5.081516 -3.402555 -0.625802  
H 3.795684 -4.708901 0.528924  
H 6.149207 -1.922859 -1.773131  
H 5.906596 -4.117827 -0.673924  
C 2.405511 1.199933 2.023428  
C 3.320501 1.015823 1.267066  
C 2.055198 2.469749 -0.280213  
C 3.883379 2.257745 1.821524  
H 3.612152 0.126749 1.655391  
C 2.616866 3.621448 0.279130  
H 1.333493 2.577519 -1.089465  
C 3.533703 3.520199 1.329957  
H 4.602004 2.167987 0.640187  
H 2.333362 4.602089 -0.110945  
H 3.975962 4.420673 1.763000  
C -1.650549 2.268180 -0.445815  
C -2.318116 3.243650 -1.204125  
C -1.110408 2.620397 0.810038  
C -2.457107 4.549237 -0.733826  
H -2.741651 2.966892 -2.173065  
C -1.250148 3.932787 1.284610  
C -1.920528 4.884155 0.511912

H -2.979883 5.297697 -1.332734  
H -0.840238 4.226688 2.249099  
H -2.022135 5.901769 0.896749  
C -2.992229 0.037936 -1.783770  
C -4.202093 0.429265 -1.180385  
C -3.018251 -0.919905 -2.813753  
C -5.413298 -0.113850 -1.615982  
H -4.201906 1.162567 -0.371085  
C -4.233501 -1.457367 -3.245570  
H -2.092774 -1.264151 -3.281884  
C -5.432607 -1.056927 -2.648330  
H -6.346745 0.202422 -1.144023  
H -4.241120 -2.196618 -4.050207  
H -6.381203 -1.480923 -2.986146  
O 4.222306 -0.013109 -1.790949  
O -0.449757 1.643429 1.521153  
C 5.428261 0.453813 -2.374202  
H 5.227908 1.479488 -2.711461  
H 6.251205 0.471999 -1.639162  
H 5.725950 -0.158520 -3.242909  
C 0.219919 2.037030 2.724864  
H 0.940184 2.842162 2.521149  
H -0.506338 2.353766 3.489982  
H 0.769542 1.164888 3.086571  
C -2.438841 -0.755447 1.981323  
C -3.428954 -1.625606 2.740910  
C -3.355958 -3.146851 2.506200  
C -3.038529 -3.633236 1.080645  
C -1.541658 -3.744342 0.702813  
C 0.912802 -2.571694 -0.056383  
H -2.526961 0.300618 2.278554  
H -2.701113 -0.829120 0.909051  
H -3.358860 -1.427385 3.825377  
H -4.439377 -1.278124 2.452114  
H -2.620507 -3.604315 3.191610  
H -4.326233 -3.567115 2.818723  
H -3.568816 -3.012822 0.334883  
H -3.476524 -4.639937 0.983083  
H -0.954353 -3.981912 1.609610  
H -1.433273 -4.639941 0.061358  
H 0.060939 -2.888649 -0.468578  
H -1.552395 -2.331888 -0.924687  
C 0.623567 -1.447575 2.583478  
C -0.638649 -1.352574 3.186702  
H 1.385741 -0.681038 2.756128  
H 1.012728 -2.439278 2.341251  
H -1.160140 -2.272413 3.441986  
H -0.878029 -0.501473 3.829968

#### <sup>4</sup>TS9-10B-24

Geometry with 85 atoms:

Total energy: -3274.478466110  
Cr -0.066427 -0.901170 1.015010  
P 1.323556 0.698080 -0.634132  
P -1.678592 -0.343886 -0.765885  
C -0.863868 0.132799 -2.387411  
C 0.670670 0.212914 -2.308596  
H -1.162836 -0.594754 -3.155068  
H -1.300509 1.096192 -2.684146  
H 1.119026 -0.774875 -2.485340  
H 1.071537 0.887474 -3.080667  
C 3.151178 0.819198 -0.869150  
C 3.851489 2.016969 -0.658069  
C 3.887177 -0.333815 -1.238401  
C 5.240646 2.081718 -0.798460  
H 3.306918 2.920916 -0.382947  
C 5.279294 -0.268941 -1.387020  
C 5.949260 0.937086 -1.162424  
H 5.760662 3.026921 -0.629147  
H 5.847487 -1.153045 -1.674629  
H 7.035202 0.974210 -1.278528  
C 0.816487 2.447278 -0.388539  
C 0.273326 3.250364 -1.403587  
C 0.970898 2.993922 0.898394  
C -0.126287 4.562774 -1.131215  
H 0.159232 2.866127 -2.418234  
C 0.590252 4.309609 1.164881  
H 1.399961 2.386375 1.699428  
C 0.029724 5.094716 0.150903  
H -0.557666 5.172217 -1.928859  
H 0.728917 4.724338 2.166553

H -0.280431 6.121344 0.359948  
C -2.567582 1.169213 -0.250728  
C -3.538621 1.749510 -1.083415  
C -2.270208 1.778829 0.986112  
H -4.208339 2.913180 -0.710111  
H -3.778820 1.268701 -2.035463  
C -2.950526 2.945489 1.367822  
C -3.907702 3.504482 0.519484  
H -4.961265 3.351097 -1.368513  
H -2.736432 3.433904 2.316144  
H -4.423911 4.415863 0.830660  
C -2.985734 -1.553658 -1.181917  
C -2.739412 -2.576898 -2.114111  
C -4.197085 -1.554263 -0.467624  
C -3.694776 -3.571874 -2.338245  
H -1.800221 -2.608212 -2.671353  
C -5.147950 -2.551583 -0.695438  
H -4.403419 -0.769741 0.263554  
C -4.900525 -3.561324 -1.630990  
H -3.493631 -4.358891 -3.069110  
H -6.088386 -2.537730 -0.139099  
H -5.646616 -4.339728 -1.807992  
C 3.166917 -1.467753 -1.434704  
O -1.307292 1.195727 1.775908  
C 3.807869 -2.644532 -1.902084  
H 4.285868 -2.477347 -2.882712  
H 4.562536 -3.009698 -1.185881  
H 3.021207 -3.402361 -2.009435  
C -1.157911 1.679995 3.112685  
H -0.371186 1.082852 3.583418  
H -0.846429 2.734861 3.122281  
H -2.096302 1.559798 3.677662  
C 1.267781 -0.888221 2.776558  
C 2.533322 -1.554294 2.224874  
C 2.664481 -3.061696 2.507301  
C 2.258768 -3.989783 1.355676  
C 0.812209 -3.926754 0.846588  
C 0.405051 -2.677411 0.054292  
H 1.265952 0.199223 2.564010  
H 1.281599 -0.964257 3.868666  
H 2.650102 -1.377545 1.144185  
H 3.382061 -1.022682 2.695967  
H 3.718265 -3.281452 2.746931  
H 2.099818 -3.322918 3.420245  
H 2.465082 -5.026796 1.673539  
H 2.934929 -3.799466 0.503819  
H 0.675654 -4.802699 0.182541  
H 0.114586 -4.110873 1.683591  
H 1.192405 -2.411081 -0.668022  
H -0.507876 -2.914647 -0.516721  
C -1.625699 -1.835223 2.096430  
C -0.635908 -1.848892 3.109726  
H -1.860948 -2.762037 1.566625  
H -2.457428 -1.132239 2.202756  
H -0.781217 -1.199160 3.975832  
H -0.131173 -2.786605 3.348737

#### <sup>4</sup>TS9-10B-25

Geometry with 85 atoms:

Total energy: -3274.475014830  
Cr -0.499493 -0.826707 1.149478  
P 1.536024 -0.296687 -0.384777  
P -1.590023 0.348685 -0.819431  
C -0.517794 0.015148 -2.301180  
C 0.939833 0.387305 -2.022529  
H -0.610899 -1.061597 -2.516667  
H -0.902384 0.564484 -3.174793  
H 1.600311 0.015968 -2.816826  
H 1.057239 1.478889 -2.002995  
C 2.720560 -1.625671 -0.829764  
C 2.561464 -2.939430 -0.366645  
C 3.857004 -1.315233 -1.624037  
C 3.497293 -3.933481 -0.666365  
H 1.691314 3.195575 0.235884  
C 4.800977 -2.310189 -1.916050  
C 4.614908 -3.610172 -1.436626  
H 3.352696 -4.949967 -0.295128  
H 5.678542 -2.079658 -2.519915  
H 5.357412 -4.376022 -1.674517  
C 2.615626 1.001095 0.356780  
C 2.411022 2.371807 0.137975

C 3.627987 0.602661 1.249411  
C 3.196222 3.322282 0.798497  
H 1.640586 2.721951 -0.549076  
C 4.410790 1.553718 1.907553  
H 3.819172 -0.458625 1.423495  
C 4.195975 2.918606 1.687365  
H 3.022108 4.384896 0.610974  
H 5.196834 1.225039 2.591995  
H 4.810713 3.662510 2.199974  
C -1.317886 2.127165 -0.466613  
C -1.644112 3.110673 -1.415079  
C -0.778353 2.523547 0.774058  
C -1.440162 4.464146 -1.152084  
H -2.075962 2.803488 -2.371149  
C -0.581220 3.886004 1.046766  
C -0.910894 4.842716 0.084841  
H -1.697250 5.216292 -1.900529  
H -0.157294 4.215012 1.993167  
H -0.747944 5.899129 0.311620  
C -3.307069 0.288051 -1.448451  
C -3.657928 -0.522548 -2.540781  
C -4.314641 0.987647 -0.759070  
C -4.995049 -0.630591 -2.934499  
H -2.898675 -1.081463 -3.090762  
C -5.647509 0.875811 -1.157017  
H -4.059158 1.624228 0.091939  
C -5.991523 0.063754 -2.243383  
H -5.256890 -1.262736 -3.786483  
H -6.422150 1.424428 -0.615697  
H -7.035836 -0.024930 -2.552207  
O 3.951255 -0.039429 -2.058017  
O -0.441157 1.534888 1.677361  
C 5.135683 0.418525 -2.690640  
H 4.994636 1.494136 -2.861394  
H 6.018699 0.269319 -2.045976  
H 5.300708 -0.081369 -3.660652  
C 0.090327 1.950362 2.943236  
H -0.624691 2.600904 3.469647  
H 0.244687 1.047369 3.537029  
H 1.053771 2.464277 2.808573  
C -2.100557 -1.108728 2.683435  
C -2.784654 -2.459536 2.929858  
C -3.916529 -2.827759 1.954691  
C -3.639022 -2.526083 0.478985  
C -2.357879 -3.086496 -0.162434  
C -0.972972 -2.702292 0.398606  
H -2.211476 -0.402730 3.151584  
H -2.543392 -0.590798 3.809985  
H -2.042091 -3.272641 2.885888  
H -3.176826 -2.490833 3.960208  
H -4.142999 -3.900663 2.085005  
H -4.837650 -2.286985 2.236080  
H -3.656292 -1.437065 0.340724  
H -4.496989 -2.890901 -0.111609  
H -2.431816 -4.191920 -0.180990  
H -2.391753 -2.782706 -1.223855  
H -0.693472 -3.352232 1.246825  
H -0.228361 -2.891020 -0.392647  
C 1.042636 -1.357491 2.581427  
C -0.066741 -1.555607 3.415170  
H 1.680368 -0.482621 2.734955  
H 1.541036 -2.228332 2.149754  
H -0.408718 -2.573017 3.609265  
H -0.247715 -0.866885 4.243488

#### <sup>4</sup>TS9-10C-01

Geometry with 89 atoms:

Total energy: -3202.740275190  
Cr 0.268563 0.094226 1.387755  
P -1.578396 0.274491 -0.598485  
P 1.762741 0.470263 -0.616308  
C 0.730623 0.315827 -2.154538  
C -0.594497 1.064421 -1.971631  
H 1.286876 0.676082 -3.032481  
H 0.553470 -0.756000 -2.324780  
H -0.404598 2.114186 -1.702770  
H -1.183006 1.062810 -2.901792  
C -3.011056 1.402078 -3.325823  
C -3.053540 2.673333 -0.930182  
C -4.047116 1.021519 0.564636  
C -4.096844 3.562748 -0.667379



H 0.602895 -2.547804 -1.699798  
H -0.841437 -3.309284 -0.840654  
H 0.665329 -4.275707 0.835889  
H 2.104482 -3.634218 -0.096819  
H -1.568794 0.418400 2.247663  
C -3.896820 2.247430 -1.467143  
C -3.337668 3.511393 -2.136079  
H -4.997983 2.271125 -1.527547  
H -3.592663 1.357672 -2.033510  
H -3.657478 3.567386 -3.188797  
H -3.691716 4.422917 -1.629198  
H -2.236987 3.530460 -2.114465  
C 4.311392 0.240091 1.000864  
C 5.081061 1.554096 1.186585  
H 4.725746 -0.519429 1.686013  
H 3.268280 0.394070 1.311451  
H 6.145742 1.431596 0.933007  
H 4.670667 2.348964 0.546679  
H 5.021088 1.894827 2.232500

#### <sup>4</sup>TS9-10C-04

Geometry with 89 atoms:

Total energy: -3202.739450420  
Cr 0.253987 1.379267 -0.914516  
P -1.638796 -0.379958 -0.091450  
P 1.640017 -0.589411 -0.267487  
C 0.557346 -2.086905 -0.462592  
C -0.712464 -1.939990 0.380612  
H 0.300613 -2.149596 -1.532248  
H 1.099942 -3.007568 -0.210167  
H -1.363956 -2.812011 0.238514  
H -0.470802 -1.890630 1.453461  
C -3.058252 -0.924943 -1.125787  
C -3.128098 -0.352863 -2.411129  
C -4.064135 -1.834876 -0.708093  
C -4.163537 -0.662730 -3.292246  
H -2.358816 0.352916 -2.721053  
C -5.101960 -2.122037 -1.611678  
C -5.158987 -1.552921 -2.884343  
H -4.194562 -0.208001 -4.285043  
H -5.891177 -2.811646 -1.300274  
H -5.984940 -1.802285 -3.555116  
C -2.367503 0.238367 1.459865  
C -3.653855 0.851442 1.460900  
C -1.574460 0.389616 2.616660  
C -4.137451 1.501597 2.600206  
H -4.285097 0.782189 0.571923  
C -2.063312 1.038323 3.753229  
H -0.563069 -0.021457 2.639707  
C -3.345170 1.598171 3.748466  
H -5.141572 1.932805 2.589517  
H -1.435571 1.107060 4.645298  
H -3.725856 2.106812 4.637379  
C 2.238324 -0.579502 1.473630  
C 2.934721 -1.638462 2.109918  
C 1.981269 0.607607 2.188423  
C 3.325199 -1.456661 3.448289  
C 2.377110 0.763387 3.515902  
C 3.053109 -0.281716 4.149638  
H 3.867208 -2.264401 3.948215  
H 2.165989 1.695642 4.044739  
H 3.378643 -0.179627 5.187859  
C 3.103725 -0.873593 -1.328177  
C 4.371025 -0.424939 -0.916659  
C 2.960922 -1.452533 -2.601974  
C 5.475345 -0.564622 -1.760803  
H 4.500741 0.026500 0.069446  
C 4.070298 -1.593391 -3.439659  
H 1.986024 -1.796511 -2.953542  
C 5.329027 -1.150345 -3.021867  
H 6.455911 -0.215336 -1.428338  
H 3.948547 -2.051063 -4.424502  
H 6.194671 -1.260790 -3.679346  
C -1.290798 2.899527 -1.349353  
C -0.995270 3.126328 0.136752  
C -0.409034 4.493741 0.499773  
C 0.915367 4.850184 -0.180984  
C 2.030655 3.816929 0.031506  
C 1.966501 2.593982 -0.890313  
H -1.306989 3.861311 -1.871159  
H -2.252702 2.393080 -1.487900

H -1.923152 2.946942 0.701628  
H -0.332312 2.345506 0.631635  
H -1.167934 5.258602 0.261942  
H -0.272632 4.526015 1.594814  
H 1.237152 5.830740 0.207138  
H 0.758515 4.996001 -1.265136  
H 3.002597 4.322718 -0.123555  
H 2.038400 3.510853 1.095252  
H 2.095747 2.928765 -1.935812  
H 2.829831 1.938663 -0.686140  
C 0.393817 0.936051 -2.946070  
C -0.332669 2.156037 -3.057178  
H -0.127792 0.002457 -3.185664  
H 1.463748 0.945089 -3.174498  
H 0.234295 3.061039 -3.287360  
H -1.325757 2.144159 -3.513670  
H 1.467756 1.431131 1.689221  
C 3.272334 -2.962415 1.453978  
C 2.416720 -4.125745 1.976365  
H 4.333999 -3.184945 1.652906  
H 3.189383 -2.892539 0.361575  
H 2.680971 -5.065094 1.465266  
H 2.566099 -4.277530 3.056933  
H 1.340989 -3.944459 1.820056  
C -4.097140 -2.520491 0.645157  
C -3.951399 -4.046389 0.560598  
H -5.059075 -2.279800 1.129624  
H -3.327932 -2.112328 1.312484  
H -3.008410 -4.339026 0.070117  
H -3.964259 -4.493422 1.567260  
H -4.771337 -4.501136 -0.016717

#### <sup>4</sup>TS9-10C-05

Geometry with 89 atoms:

Total energy: -3202.739214900  
Cr -0.013793 -0.760969 1.249088  
P -1.719772 -0.193813 -0.468107  
P 1.588598 0.131228 -0.715823  
C 0.407833 0.511261 -2.114429  
C -0.857277 -0.351054 -2.111050  
H 0.140567 1.569487 1.965349  
H 0.931471 0.457869 -3.081297  
H -1.528243 -0.055983 -2.930831  
H -0.615072 -1.414759 -2.252424  
C -2.355577 1.531354 -0.428778  
C -1.812663 2.346840 0.584408  
C -3.262703 2.089625 -1.365462  
C -2.127757 3.700945 0.680765  
H -1.131031 1.905729 1.315659  
C -3.553374 3.461070 -1.254900  
C -2.999112 4.261554 -0.255891  
H -1.694962 4.311195 1.476667  
H -4.236698 3.911737 -1.979817  
H -3.251076 5.323866 -0.207877  
C -3.161999 -1.316806 -0.515942  
C -3.115524 -2.541963 -1.203314  
C -4.302321 -0.999601 0.243671  
C -4.200128 -3.421754 -1.146673  
H -2.239880 -2.823689 -1.790675  
C -5.381289 -1.884790 0.299863  
H -4.352680 -0.053043 0.786962  
C -5.334163 -3.096233 -0.396726  
H -4.156439 -4.367638 -1.692107  
H -6.263846 -1.623627 0.888859  
H -6.179752 -3.786946 -0.354326  
C 2.734293 -1.161770 -1.360410  
C 3.898429 -1.522646 -0.635726  
C 2.395470 -1.880993 -2.522904  
C 4.677488 -2.588536 -1.115209  
C 3.184386 -2.938805 -2.976735  
C 4.332873 -3.295413 -2.267086  
H 5.576296 -2.872129 -0.560522  
H 2.900770 -3.480199 -3.882325  
H 4.958362 -4.123891 -2.608112  
C 2.551885 1.695866 -0.686691  
C 2.223799 2.682837 0.256923  
C 3.546401 1.961355 -1.642984  
C 2.885418 3.914137 0.251116  
H 1.440942 2.496150 0.994813  
C 4.205981 3.193108 -1.646292  
H 3.812860 1.201889 -2.382082

C 3.879443 4.168975 -0.698364  
H 2.623736 4.675421 0.990011  
H 4.980369 3.396631 -2.391626  
H 4.399883 5.129776 -0.701486  
C 1.509144 -1.254439 2.801450  
C 1.291960 0.258806 2.938954  
C 0.798201 0.719805 4.320792  
C -0.492302 0.052301 4.819745  
C -1.644870 -0.010070 3.805315  
C -1.488670 -1.057251 2.692886  
H 1.088083 -1.778132 3.662576  
H 2.578009 -1.465148 2.732666  
H 2.211565 0.793841 2.658596  
H 0.545371 0.733471 2.224917  
H 1.606850 0.551654 5.051608  
H 0.649420 1.813084 4.273363  
H -0.820732 0.602820 5.716708  
H -0.276346 -0.972944 5.168871  
H -2.569890 -0.228686 4.371924  
H -1.810638 0.997073 3.375090  
H -1.266083 -2.044909 3.138553  
H -2.446306 -1.177219 2.163144  
C 0.069326 -2.711299 0.552968  
C 1.157489 -2.791357 1.478172  
H 0.327917 -2.711895 -0.512428  
H -0.868080 -3.218443 0.804706  
H 1.053990 -3.454024 2.340345  
H 2.161815 -2.784084 1.049249  
H 1.505928 -1.618103 -3.096494  
C 4.359844 -0.815990 0.625493  
C 5.651166 -0.007369 0.446864  
H 4.524536 -1.576895 1.407793  
H 3.570612 -0.153210 1.008439  
H 6.481978 -0.649683 0.114801  
H 5.522840 0.790330 -0.298972  
H 5.948887 0.462383 1.397858  
C -3.956995 1.305952 -2.464388  
C -5.482970 1.253309 -2.305419  
H -3.581218 0.277040 -2.512292  
H -3.710874 1.773814 -3.433752  
H -5.764564 0.763407 -1.361278  
H -5.931770 2.258706 -2.311043  
H -5.935039 0.680183 -3.130280

#### <sup>4</sup>TS9-10C-06

Geometry with 89 atoms:

Total energy: -3202.741941120  
Cr -0.327271 -0.932323 1.002688  
P 1.542004 0.127637 -0.692441  
P -1.808302 0.038778 -0.791222  
C -0.792066 -0.082968 -2.343562  
C 0.521883 0.683681 -2.164036  
H -0.603505 -1.147808 -2.542562  
H -1.366415 0.321565 -3.191865  
H 1.130529 0.649634 -3.080569  
H 0.312629 1.748295 -1.972549  
C 2.706377 -1.145379 -1.352128  
C 2.419863 -1.786115 -2.573041  
C 3.829993 -1.565069 -0.595447  
C 3.222611 -2.820288 -3.056266  
H 1.559227 -1.480911 -3.169566  
C 4.623999 -2.605675 -1.105789  
C 4.332820 -3.233024 -2.316962  
H 2.979233 -3.299523 -4.007485  
H 5.494205 -2.931020 -0.528416  
H 4.969529 -4.043010 -2.680854  
C 2.573285 1.628674 -0.430061  
C 2.571762 2.283964 0.809988  
C 3.355373 2.143780 -1.478295  
C 3.339097 3.437218 1.001908  
H 1.975659 1.891070 1.635052  
C 4.116234 3.299015 -1.287339  
H 3.384889 1.632339 -2.443757  
C 4.109904 3.946898 -0.046735  
H 3.334791 3.937376 1.973429  
H 4.722673 3.691028 -2.107476  
H 4.710034 4.847691 0.102925  
C -2.432706 1.778754 -0.875933  
H -1.960841 2.824153 -0.050443  
C -3.393240 2.058988 -1.871486  
C -2.478871 4.117576 -0.253949

C -3.891691 3.345800 -2.052693  
C -3.430081 4.383275 -1.235348  
H -2.116132 4.932676 0.378551  
H -4.636811 3.538556 -2.828090  
H -3.810215 5.399376 -1.366693  
C -3.308717 -0.972654 -1.076235  
C -3.346046 -2.016103 -2.016115  
C -4.432292 -0.747936 -0.259086  
C -4.486912 -2.816914 -2.136163  
H -2.493246 -2.217276 -2.666545  
C -5.568102 -1.548858 -0.383556  
H -4.426529 0.064061 0.471771  
C -5.598113 -2.586848 -1.321487  
H -4.505063 -3.622051 -2.874832  
H -6.434886 -1.359959 0.254374  
H -6.488248 -3.213094 -1.418043  
C 1.130569 -1.805353 2.399807  
C 0.870932 -0.442812 3.068250  
C 0.260067 -0.495142 4.477263  
C -1.261813 -0.674373 4.551481  
C -1.860384 -1.748699 3.632161  
C -2.005616 -1.319534 2.169218  
H 1.074623 -2.590872 3.158488  
H 2.118356 -1.830319 1.933807  
H 1.838350 0.084868 3.096884  
H 0.249600 0.286890 2.464730  
H 0.760295 -1.311114 5.026483  
H 0.530442 0.433637 5.007053  
H -1.750759 0.288429 4.321121  
H -1.520221 -0.896372 5.600071  
H -1.276901 -2.683878 3.716954  
H -2.863924 -2.002428 4.023595  
H -2.571706 -2.077645 1.602395  
H -2.610109 -0.393294 2.129186  
C -0.377709 -2.747436 -0.062883  
C 0.252252 -3.224367 1.116634  
H 0.230978 -2.692835 -0.972080  
H -1.434552 -2.983011 -0.214509  
H -0.375252 -3.711107 1.867749  
H 1.260759 -3.637428 1.041298  
H -3.764625 1.253235 -2.508986  
C -0.952639 2.639948 1.062170  
C -1.582793 2.656817 2.459082  
H -0.192927 3.434924 0.990970  
H -0.405033 1.696948 0.917299  
H -2.095327 3.612445 2.650316  
H -2.326096 1.852886 2.570227  
H -0.817192 2.526245 3.240786  
C 4.251422 -0.934681 0.718601  
C 5.475747 -0.018156 0.594906  
H 4.480727 -1.742894 1.433600  
H 3.420653 -0.365711 1.160445  
H 5.279157 0.821523 -0.086855  
H 5.750520 0.397818 1.577186  
H 6.345444 -0.571377 0.206824

#### <sup>4</sup>TS9-10C-07

Geometry with 89 atoms:

Total energy: -3202.739491920  
Cr -0.084582 -1.115406 1.039840  
P 1.530144 0.249832 -0.639681  
P -1.756406 -0.125010 -0.504117  
C -0.887017 0.041509 -2.137937  
C 0.375026 0.889398 -1.966615  
H -0.640858 -0.979024 -2.467115  
H -1.553435 0.473674 -2.896394  
H 0.917007 1.010007 -2.917027  
H 0.106758 1.904333 -1.633860  
C 2.731557 -0.846869 -1.510877  
C 2.447098 -1.313687 -2.808804  
C 3.886708 -1.322923 -0.840324  
C 3.285144 -2.227018 -3.450209  
H 1.560657 -0.968546 -3.342315  
C 4.716446 -2.237975 -1.509203  
C 4.428181 -2.691292 -2.796464  
H 3.042967 -2.572262 -4.458091  
H 5.609925 -2.606298 -0.997069  
H 5.091984 -3.408182 -3.285682  
C 2.449879 1.789572 -0.239995  
C 2.134091 2.495038 0.932064  
C 3.407430 2.315305 -1.123858

C 2.772387 3.704692 1.221691  
H 1.383610 2.104433 1.622465  
C 4.041571 3.525475 -0.833102  
H 3.666633 1.772989 -2.036562  
C 3.727687 4.219757 0.340721  
H 2.522611 4.245246 2.137947  
H 4.786656 3.926607 -1.524571  
H 4.229187 5.163639 0.568069  
C -2.324965 1.562307 -0.033378  
C -3.186072 2.387814 -0.799568  
C -1.851595 2.023861 1.210449  
C -3.522077 3.649021 -0.276889  
C -2.193149 3.280893 1.705820  
C -3.036321 4.099305 0.951013  
H -4.190656 4.292697 -0.855641  
H -1.812451 3.612137 2.674595  
H -3.323918 5.086276 1.321790  
C -3.257952 -1.118270 -0.825318  
C -4.402941 -0.915855 -0.034249  
C -3.259877 -2.142425 -1.787923  
C -5.533577 -1.714962 -0.215853  
H -4.416351 -0.127712 0.722327  
C -4.395061 -2.938747 -1.964800  
H -2.382169 -2.326731 -2.410844  
C -5.533373 -2.726549 -1.181715  
H -6.419885 -1.544476 0.400102  
H -4.388683 -3.727734 -2.720887  
H -6.419992 -3.349072 -1.323701  
C 1.413334 -1.923185 2.478929  
C 1.103673 -0.504654 2.982362  
C 0.547500 -0.432436 4.414832  
C -0.719437 -1.261316 4.673070  
C -1.835875 -1.116824 3.626724  
C -1.582766 -1.840654 2.295422  
H 1.016412 -2.663159 3.177440  
H 2.493841 -2.048919 2.387866  
H 1.998357 0.127246 2.880582  
H 0.342767 0.096152 2.386635  
H 1.342435 -0.745269 5.112244  
H 0.342063 0.629197 4.638848  
H -1.104292 -0.972675 5.665091  
H -0.458770 -2.330748 4.760328  
H -2.763421 -1.516585 4.078544  
H -2.046269 -0.042688 3.457043  
H -1.315317 -2.895677 2.493680  
H -2.514061 -1.872609 1.708378  
C 0.083541 -2.835084 -0.096173  
C 1.143817 -3.109192 0.826996  
H 0.379036 -2.586861 -1.121576  
H -0.843898 -3.410512 -0.007441  
H 1.030846 -3.960773 1.501504  
H 2.160698 -2.987036 0.446778  
H -1.212538 1.370538 1.807460  
C -3.747929 2.016211 -2.156856  
C -3.081346 2.781691 -3.309483  
H -4.827361 2.242112 -2.157787  
H -3.677535 0.934453 -2.328983  
H -1.993869 2.606546 -3.342255  
H -3.505167 2.474451 -4.278770  
H -3.230748 3.868035 -3.206516  
C 4.286413 -0.891832 0.558520  
C 5.528829 0.007281 0.599473  
H 4.486565 -1.798307 1.155228  
H 3.452446 -0.377608 1.057912  
H 6.398491 -0.496026 0.148485  
H 5.360674 0.945845 0.052320  
H 5.789016 0.261807 1.639293

#### <sup>4</sup>TS9-10C-08

Geometry with 89 atoms:

Total energy: -3202.739933690  
Cr -0.001784 -1.039954 1.032418  
P 1.505314 0.368135 -0.709591  
P -1.750112 -0.190124 -0.497921  
C -0.918508 -0.008324 -2.151474  
C 0.290380 0.920633 -2.019639  
H -0.616384 -1.021588 -2.456447  
H -1.620843 0.360152 -2.910677  
H 0.808398 1.061006 -2.980722  
H -0.034827 1.921578 -1.694816  
C 2.742384 -0.679296 -1.587696

C 2.442535 -1.197934 -2.860742  
C 3.947202 -1.065327 -0.939822  
C 3.307968 -2.085915 -3.502588  
H 1.522786 -0.915613 -3.374404  
C 4.801956 -1.954550 -1.609469  
C 4.493413 -2.464057 -2.872847  
H 3.053028 -2.476901 -4.490349  
H 5.734680 -2.261158 -1.133697  
H 5.181861 -3.157396 -3.362033  
C 2.341567 1.957733 -0.328861  
C 1.857349 2.729476 0.740636  
C 3.406733 2.445107 -1.103988  
C 2.430673 3.970196 1.032476  
H 1.021727 2.367079 1.343687  
C 3.981803 3.683063 -0.805138  
H 3.793025 1.853491 -1.937780  
C 3.496335 4.446102 0.262535  
H 2.045459 4.564865 1.864371  
H 4.812656 4.054260 -1.410240  
H 3.949770 5.413067 0.493727  
C -2.415128 1.467949 -0.051647  
C -3.313685 2.237958 -0.833085  
C -1.965798 1.976424 1.183965  
C -3.708932 3.492419 -0.335306  
C -2.368265 3.224827 1.654628  
H -3.247278 3.988652 0.883784  
H -4.405311 4.093085 -0.927211  
H -2.005392 3.591875 2.617447  
H -3.581110 4.968189 1.235000  
C -3.171307 -1.308409 -0.766317  
C -4.397513 -1.075606 -0.120980  
C -3.006943 -2.478223 -1.529341  
C -5.444984 -1.990965 -0.250128  
H -4.539452 -0.174814 0.480057  
C -4.059225 -3.388114 -1.657324  
H -2.057130 -2.691476 -2.024527  
C -5.279597 -3.147466 -1.018188  
H -6.395673 -1.797451 0.252784  
H -3.922534 -4.291113 -2.257284  
H -6.100424 -3.861779 -1.117586  
C 1.557418 -1.661140 2.493816  
C 1.162369 -0.235213 2.916090  
C 0.593432 -0.117693 4.341156  
C -0.596531 -1.033694 4.664822  
C -1.736884 -1.044553 3.634990  
C -1.442719 -1.804558 2.334366  
H 1.197333 -2.383581 3.229262  
H 2.644562 -1.732451 2.421745  
H 2.020760 0.440464 2.785144  
H 0.386202 0.296101 2.276375  
H 1.410771 -0.315189 5.054788  
H 0.298832 0.935208 4.496877  
H -0.990992 -0.722039 5.646116  
H -0.244337 -2.070557 4.808108  
H -2.615677 -1.505697 4.124523  
H -2.049245 -0.004638 3.420693  
H -1.098847 -2.828374 2.573165  
H -2.374571 -1.926224 1.758439  
C 0.283302 -2.794476 -0.015905  
C 1.378931 -2.931161 0.900419  
H 0.539504 -2.579679 -1.059861  
H -0.590544 -3.439605 0.122049  
H 1.352898 -3.759849 1.611778  
H 2.374950 -2.740385 0.493782  
H -1.296562 1.370115 1.796957  
C -3.856450 1.817189 -2.184073  
C -3.220556 2.591395 -3.348223  
H -4.944578 1.996006 -2.190516  
H -3.738830 0.736512 -2.337589  
H -3.419816 3.671397 -3.265565  
H -2.126192 2.464822 -3.371871  
H -3.624744 2.247322 -4.313463  
C 4.325074 -0.518660 0.424899  
C 5.210170 -1.414743 1.291937  
H 3.403752 -0.281456 0.978231  
H 4.821313 0.457920 0.286849  
H 4.784384 -2.425169 1.404972  
H 6.223241 -1.527311 0.876739  
H 5.322772 -0.978557 2.296771

#### <sup>4</sup>TS9-10C-09

Geometry with 89 atoms:

Total energy: -3202.739138150

Cr 0.469233 -1.122449 0.978066  
P -1.718744 -0.017094 -0.307623  
P 1.512202 0.582511 -0.600545  
C 0.418070 0.523444 -2.111049  
C -1.019083 0.932185 -1.760620  
H 0.823421 1.194068 -2.885150  
H 0.454935 -0.504526 -2.506696  
H -1.049853 1.992524 -1.473057  
H -1.671145 0.819182 -2.638460  
C -2.901127 1.091416 0.563878  
C -2.736682 1.161294 1.961174  
C -3.952569 1.815976 -0.051980  
C -3.569341 1.947685 2.756650  
H -1.943908 0.582859 2.433591  
C -4.778458 2.601385 0.771209  
C -4.595376 2.677336 2.152255  
H -3.419209 1.985152 3.838080  
H -5.594099 3.163944 0.308163  
H -5.260843 3.298715 2.756715  
C -2.768901 -1.324327 -1.055865  
C -3.864525 -1.825398 -0.330564  
C -2.422948 -1.933121 -2.275420  
C -4.596540 -2.912188 -0.816035  
H -4.156435 -1.358799 0.613198  
C -3.159325 -3.018682 -2.757794  
H -1.574566 -1.571097 -2.860390  
C -4.244825 -3.514019 -0.028496  
H -5.449459 -3.287316 -0.245047  
H -2.882746 -3.479476 -3.709370  
H -4.818026 -4.363739 -2.406703  
C 3.218328 0.271321 -1.196670  
C 4.315468 0.472870 -0.317857  
C 3.436473 -0.240274 -2.488354  
C 5.598685 0.154470 -0.787607  
C 4.724153 -0.551706 -2.927740  
C 5.808159 -0.350508 -2.072677  
H 6.459670 0.303360 -0.133960  
H 4.875200 -0.947706 -3.934662  
H 6.822232 -0.587754 -2.403691  
C 1.443483 2.377129 -0.198489  
C 0.502783 2.851995 0.728829  
C 2.274166 3.294669 -0.864663  
C 0.386167 4.221527 0.982358  
H -0.151778 2.156709 1.252883  
C 2.162087 4.662202 -0.601723  
H 3.017026 2.941714 -1.584114  
C 1.217757 5.128518 0.319855  
H -0.355984 4.575947 1.701766  
H 2.816329 5.367595 -1.120038  
H 1.132741 6.199086 0.521942  
C -0.888684 -2.634552 1.897864  
C -0.570914 -3.267228 0.538052  
C 0.170523 -4.606811 0.558440  
C 1.560330 -4.594492 1.199776  
C 2.494767 -3.506011 0.653572  
C 2.281027 -2.124343 1.276411  
H -0.801998 -3.396063 2.679188  
H -1.905676 -2.223367 1.909257  
H -1.520533 -3.377447 -0.005511  
H -0.008887 -2.601173 -0.191985  
H -0.473092 -5.342513 1.070341  
H 0.260589 -4.952386 -0.486206  
H 2.009315 -5.589708 1.046554  
H 1.470987 -4.471428 2.294470  
H 3.539201 -3.817825 0.843878  
H 2.409022 -3.460522 -0.449976  
H 2.416310 -2.203266 2.369801  
H 3.061657 -1.440439 0.916603  
C 0.628423 -0.155499 2.822250  
C -0.024540 -1.334697 3.288078  
H 0.066972 0.783637 2.831408  
H 1.698898 -0.045974 3.019866  
H 0.591640 -2.096221 3.771671  
H -1.022858 -1.240186 3.724041  
H 2.602662 -0.403306 -3.172216  
C 4.126040 1.041023 1.077775  
C 5.085974 0.519797 2.148369  
H 3.094508 0.846031 1.410113  
H 4.197405 2.141938 1.018838

H 5.062041 -0.580158 2.204882  
H 6.127033 0.827172 1.965375  
H 4.802689 0.917750 3.135491  
C -4.234379 1.814695 -1.540196  
C -3.811846 3.117561 -2.234337  
H -5.317962 1.669849 -1.685810  
H -3.756584 0.953818 -2.025483  
H -4.360376 3.981010 -1.825882  
H -2.737900 3.320709 -2.101393  
H -4.018833 3.069290 -3.315339

<sup>4</sup>TS9-10C-10

Geometry with 89 atoms:

Total energy: -3202.740823620

Cr 0.259923 0.248375 1.322350  
P -1.548968 0.295547 -0.639205  
P 1.803856 0.387140 -0.688971  
C 0.743392 0.283876 -2.211275  
C -0.555799 1.073670 -2.012351  
H 1.304091 0.632407 -3.091447  
H 0.535272 -0.783694 -2.382647  
H -0.328221 2.112517 -1.733937  
H -1.151012 1.102457 -2.937502  
C -3.013257 1.393084 -0.409132  
C -2.968283 2.719428 -0.883843  
C -4.144458 0.958639 0.329340  
C -4.015602 3.610204 -0.646903  
H -2.108094 3.077345 -1.450226  
C -5.185348 1.875646 0.551606  
C -5.131925 3.185586 0.076055  
H -3.955695 4.632364 -1.027961  
H -6.059821 1.546196 1.120140  
H -5.958156 3.873225 0.272175  
C -2.183167 -1.204773 -1.502174  
C -1.919994 -2.483330 -0.989451  
C -2.924817 -1.083036 -2.690348  
C -2.386014 -3.623616 -1.651903  
H -1.356307 -2.595198 -0.062346  
C -3.385032 -2.221678 -3.354430  
H -3.158451 -0.093860 -3.092851  
C -3.116294 -3.494039 -2.836173  
H -2.177513 -4.614257 -1.240455  
H -3.962128 -2.116050 -4.276286  
H -3.480804 -4.383907 -3.355097  
C 3.152034 -0.843878 -0.954615  
C 2.902169 -2.232620 -0.799091  
C 4.442419 -0.401785 -1.299141  
C 3.972377 -3.122139 -0.980742  
C 5.487611 -1.308066 -1.480246  
C 5.251139 -2.673398 -1.315962  
H 3.803833 -4.193899 -0.862532  
H 6.482643 -0.943699 -1.746242  
H 6.061854 -3.393950 -1.449435  
C 2.623070 2.031780 -0.789181  
C 3.426304 2.446154 0.291274  
C 2.456543 2.903653 -1.878048  
C 4.048048 3.695302 0.278033  
H 3.575689 1.786905 1.147827  
C 3.072767 4.159932 -1.883004  
H 1.853407 2.619386 -2.741508  
C 3.868971 4.559310 -0.807757  
H 4.673021 3.995733 1.122527  
H 2.931323 4.825257 -2.738270  
H 4.351401 5.539627 -0.815330  
C -1.326968 0.026744 2.854164  
C -0.890838 -1.421771 2.594549  
C -0.307007 -2.161372 3.804342  
C 0.928543 -1.512469 4.433634  
C 2.068768 -1.240133 3.443468  
C 1.910963 0.028242 2.596147  
H -1.341598 0.211393 3.932442  
H -2.319839 0.213426 2.440756  
H -1.756803 -1.975499 2.197922  
H -0.145652 -1.575125 1.751177  
H -1.104909 -2.257550 4.560236  
H -0.054164 -3.188536 3.488622  
H 1.283322 -2.179350 5.236710  
H 0.649589 -0.567059 4.932979  
H 3.011642 -1.165511 4.017581  
H 2.201736 -2.125843 2.793610  
H 1.893977 0.912406 3.260876

H 2.812127 0.132182 1.969472  
C 0.109898 3.222381 1.493045  
C -0.664354 1.982814 2.638184  
H -0.406341 2.775591 0.638898  
H 1.132597 2.675734 1.648162  
H -0.170856 2.039172 3.611158  
H -1.717233 2.273693 2.658355  
H 4.640785 0.663262 -1.425711  
C 1.516325 -2.764349 -0.493759  
C 1.441451 -4.024289 0.368638  
H 0.984564 -2.944296 -1.445354  
H 0.936261 -1.967650 0.000385  
H 1.839081 -4.908646 -0.151467  
H 2.005605 -3.904067 1.306461  
H 0.394455 -4.251635 0.625662  
C -4.316460 -0.446976 0.874781  
C -5.315662 -1.296400 0.078413  
H -4.662750 -0.373295 1.919637  
H -3.351052 -0.970444 0.912985  
H -4.991253 -1.420939 -0.964523  
H -5.417893 -2.297943 0.525661  
H -6.312277 -0.827643 0.068100

<sup>4</sup>TS9-10C-11

Geometry with 89 atoms:

Total energy: -3202.739973580

Cr 0.195249 0.009232 1.358218  
P -1.569999 0.213780 -0.700738  
P 1.764338 0.534678 -0.546066  
C 0.819318 0.345467 -2.135914  
C -0.542989 1.039234 -2.022122  
H 1.405394 0.734701 -2.981400  
H 0.698580 -0.732284 -2.319625  
H -0.406365 2.095372 -1.747911  
H -1.087440 1.010051 -2.978306  
C -3.027112 1.314912 -0.465335  
C -3.030741 2.623100 -0.982036  
C -4.126918 0.865332 0.314607  
C -4.095868 3.492157 -0.736324  
H -2.198923 2.986082 -1.586350  
C -5.182898 1.758732 -0.547749  
C -5.174582 3.057438 0.033108  
H -4.077034 4.504520 -1.146503  
H -6.035897 1.434801 -1.146124  
H -6.013631 3.727549 0.235674  
C -2.221541 -1.239966 -1.625405  
C -1.698787 -2.518519 -1.381325  
C -3.223532 -1.083690 -2.599798  
C -2.161588 -3.624515 -2.101883  
H -0.928363 -2.657301 -0.622928  
C -3.687740 -2.189525 -3.314758  
H -3.651884 -0.096596 -2.792464  
C -3.157154 -3.461637 -3.068205  
H -1.746151 -4.615415 -1.902922  
H -4.469576 -2.059228 -4.067202  
H -3.523928 -4.325469 -3.627945  
C 3.327929 -0.426390 -0.749166  
C 3.325148 -1.843297 -0.760369  
C 4.554058 0.263191 -0.822116  
C 4.558420 -2.511938 -0.830517  
C 5.764552 -0.424913 -0.898986  
C 5.767678 -1.821338 -0.869787  
H 4.562671 -3.605709 -0.829224  
H 6.702361 0.132684 -0.955281  
H 6.709964 -2.372506 -0.945328  
C 2.289352 2.299656 -0.535340  
C 2.746148 2.861842 0.671343  
C 2.268900 3.101233 -1.689776  
C 3.171012 4.190887 0.179768  
H 2.782764 2.258008 1.578968  
C 2.684736 4.435153 -1.635230  
H 1.936449 2.698977 -2.647859  
C 3.137040 4.983040 -0.432270  
H 3.527939 4.609467 1.663826  
H 2.660027 5.044797 -2.541835  
H 3.464875 6.024599 -0.392411  
C -1.164636 -0.783864 2.932387  
C -0.709866 -2.031208 2.162395  
C 0.040247 -3.073827 3.008270  
C 1.261996 -2.550903 3.777922  
C 2.252849 -1.705895 2.963438



C 1.804859 -0.270010 2.654872  
H -0.709846 -0.759104 3.925348  
H -2.252178 -0.792020 3.034517  
H -1.576561 -2.489926 1.664108  
H -0.020974 -1.862123 1.273443  
H -0.675353 -3.522475 3.717455  
H 0.355010 -3.888658 2.332715  
H 1.785596 -3.427394 4.194214  
H 0.933702 -1.964773 4.654319  
H 3.199477 -1.665639 3.534885  
H 2.512469 -2.238812 2.030528  
H 1.530911 0.248520 3.593381  
H 2.661675 0.282064 2.234113  
C -0.273791 1.943197 1.941833  
C -1.261196 1.269581 2.722165  
H -0.612061 2.500581 1.060734  
H 0.580566 2.385579 2.461703  
H -1.190302 1.329261 3.810717  
H -2.288709 1.292259 2.350255  
H 4.569142 1.353419 -0.816522  
C 2.067290 -2.687183 -0.739880  
C 1.754065 -3.351705 -2.086961  
H 1.208193 -2.079220 -0.416752  
H 2.178838 -3.472132 0.026699  
H 2.582480 -4.004328 -2.403392  
H 0.844237 -3.967600 -2.023139  
H 1.602714 -2.607547 -2.884750  
C -4.179840 -0.549703 0.859338  
C -4.980675 -0.751193 2.146058  
H -3.150297 -0.903322 1.021021  
H -4.578156 -1.212550 0.070622  
H -4.655200 -0.060318 2.940847  
H -6.059776 -0.596349 1.994049  
H -4.853369 -1.780520 2.516104

<sup>4</sup>TS9-10C-12

Geometry with 89 atoms:

Total energy: -3202.736679580

Cr -0.479772 -1.085197 1.081573  
P 1.557334 -0.266190 -0.521333  
P -1.696868 -0.171489 -0.935488  
C -0.559866 -0.568234 -2.353081  
C 0.783273 0.147999 -2.179361  
H -0.413287 -1.659027 -2.349221  
H -1.025881 -0.305099 -3.314407  
H 1.476361 -0.156781 -2.975746  
H 0.656001 1.237057 -2.265704  
C 3.027323 -1.294175 -0.948332  
C 3.024187 -2.613446 -0.456568  
C 4.106964 -0.850646 -1.756643  
C 4.063463 -3.500296 -0.737111  
H 2.189775 -2.953378 0.153410  
C 5.138829 -1.766116 -2.027486  
C 5.128855 -3.069434 -1.529409  
H 4.036731 -4.519012 -0.343459  
H 5.973098 -1.442323 -2.655971  
H 5.951293 -3.748970 -1.766303  
C 2.246120 1.296147 0.163420  
C 3.274552 1.201458 1.119808  
C 1.702387 2.559196 -0.124196  
C 3.746461 2.344064 1.770382  
H 3.722774 0.230774 1.347580  
C 2.180216 3.701003 0.526414  
H 0.895916 2.670971 -0.851572  
C 3.199892 3.597906 1.476741  
H 4.550797 2.254702 2.504831  
H 1.749858 4.676032 0.284985  
H 3.571054 4.491471 1.984103  
C -2.091998 1.614362 -1.220872  
C -1.935904 2.619490 -0.233285  
C -2.558083 1.959326 -2.503310  
C -2.225982 3.945986 -0.595365  
C -2.842915 3.282485 -2.837800  
C -2.666722 4.279939 -1.877515  
H -2.112346 4.741447 0.141655  
H -3.204522 3.528741 -3.838760  
H -2.882840 5.323254 -2.120889  
C -3.266985 -1.037783 -1.311916  
C -3.268900 -2.307592 -1.915470  
C -4.488593 -0.469234 -0.908963  
C -4.472481 -2.988615 -2.119472

H -2.337466 -2.777249 -2.236820  
C -5.687534 -1.156557 -1.111514  
H -4.508985 0.520621 -0.446852  
C -5.682900 -2.417127 -1.716776  
H -4.461805 -3.971244 -2.597444  
H -6.630094 -0.701411 -0.797792  
H -6.622043 -2.952026 -1.877425  
C 0.942690 -1.734675 2.641122  
C 0.628340 -0.298758 3.062944  
C -0.038080 -0.151806 4.434530  
C -1.369511 -0.891834 4.598087  
C -2.424257 -0.527166 3.543883  
C -2.269345 -1.229642 2.188625  
H 0.893864 -2.394098 3.512839  
H 1.935302 -1.815059 2.184294  
H 1.557433 0.291356 3.020197  
H -0.009106 0.296105 2.340796  
H 0.678437 -0.499864 5.197996  
H -0.196108 0.923557 4.627828  
H -1.756632 -0.665350 5.605211  
H -1.201634 -1.984101 4.581790  
H -3.421042 -0.777409 3.953839  
H -2.436580 0.571780 3.419755  
H -2.424998 -2.313721 2.335737  
H -3.083368 -0.907719 1.517586  
C -0.617022 -3.045546 0.366224  
C 0.002129 -3.328712 1.614069  
H -0.027784 -3.189895 -0.546209  
H -1.690268 -3.232295 0.266270  
H -0.638302 -3.638856 2.442343  
H 0.986559 -3.802691 1.628342  
H -2.719473 1.180463 -3.252377  
C -1.475492 2.282372 1.171883  
C -1.442903 3.419206 2.188009  
H -0.460333 1.861040 1.099752  
H -2.113775 1.473316 1.557683  
H -0.740350 4.214278 1.893224  
H -2.436204 3.873589 2.329785  
H -1.110999 3.037547 3.166059  
C 4.230971 0.540503 -2.351583  
C 5.403090 1.351738 -1.782646  
H 3.307039 1.114779 -2.214010  
H 4.365246 0.433617 -3.442163  
H 5.455658 2.340953 -2.264395  
H 5.288016 1.509319 -0.700096  
H 6.366927 0.845992 -1.950515

<sup>4</sup>TS9-10C-13

Geometry with 89 atoms:

Total energy: -3202.739798060

Cr 0.194487 -0.021819 1.314458  
P -1.576736 0.266165 -0.708687  
P 1.757675 0.617140 -0.570065  
C 0.794455 0.552630 -2.159360  
C -0.579139 1.206352 -1.974911  
H 1.366864 1.027214 -2.970419  
H 0.690302 -0.506545 -2.438229  
H -0.460315 2.240580 -1.620099  
H -1.134077 1.241147 -2.925033  
C -3.073820 1.300189 -0.424006  
C -3.122271 2.632323 -0.872542  
C -4.162792 0.770659 0.319712  
C -4.222143 3.446990 -0.595434  
H -2.299687 3.056834 -1.448072  
C -5.255298 1.609675 0.584247  
C -5.291722 2.932474 0.136696  
H -4.237836 4.479082 -0.953131  
H -6.102523 1.223056 1.152857  
H -6.158627 3.558445 0.361990  
C -2.167665 -1.156975 -1.719307  
C -1.616966 -2.433335 -1.527645  
C -3.147913 -0.976331 -2.711075  
C -2.028648 -3.510786 -2.318968  
H -0.866761 -2.595627 -0.754006  
C -3.561582 -2.054026 -3.496782  
H -3.597149 0.008258 -2.864734  
C -3.001504 -3.322522 -3.303912  
H -1.591050 -4.499656 -2.161096  
H -4.326399 -1.904153 -4.262917  
H -3.327963 -4.164159 -3.919664  
C 3.305266 -0.336831 -0.881300

C 3.274844 -1.752340 -1.000269  
C 4.532733 0.343829 -0.961800  
C 4.491238 2.426472 -1.182403  
C 5.728473 -0.351125 -1.150310  
C 5.706374 -1.741339 -1.257250  
H 4.495300 -3.513806 -1.270539  
H 6.671611 0.197056 -1.209472  
H 6.635519 -2.298618 -1.399632  
C 2.288231 2.375381 -0.428824  
C 2.818931 2.822927 0.795909  
C 2.179454 3.290023 -1.490320  
C 3.232737 4.146972 0.951188  
H 2.920415 2.134548 1.635593  
C 2.583382 4.619078 -1.327661  
H 1.783160 2.983064 -2.459009  
C 3.111286 5.051244 -0.108791  
H 3.648432 4.473561 1.907452  
H 2.488785 5.316888 -2.163331  
H 3.428985 6.089343 0.015083  
C -1.160132 -0.856099 2.883053  
C -0.725276 -2.085143 2.074515  
C 0.023195 -3.161616 2.878086  
C 1.265057 -2.678022 3.640876  
C 2.248341 -1.814616 2.836643  
C 1.810338 -0.363826 2.588568  
H -0.695317 -0.863919 3.871780  
H -2.246831 -0.856424 2.995463  
H -1.598175 -2.522498 1.567619  
H -0.041518 -1.892907 1.189295  
H -0.686812 -3.621549 3.585604  
H 0.316260 -3.985973 2.173159  
H 1.787567 -3.573686 4.015697  
H 0.960929 -2.119017 4.543147  
H 3.206734 -1.805250 3.894444  
H 2.483217 -2.314817 1.878935  
H 1.551596 0.122825 3.548170  
H 2.670213 0.191617 2.180561  
C -0.256987 1.895095 1.964708  
C -1.238289 1.206003 2.739343  
H -0.604965 2.485756 1.109457  
H 0.612550 2.310576 2.481789  
H -1.148212 1.228821 3.827778  
H -2.271861 1.251217 2.385828  
H 4.562920 1.430468 -0.873582  
C 1.966315 -2.516582 -0.964474  
C 2.033569 -3.988374 -0.561931  
H 1.481526 -2.442893 -1.953872  
H 1.285874 -1.985986 -0.276949  
H 1.018042 -4.402783 -0.459290  
H 2.551589 -4.598016 -1.317769  
H 2.555432 -4.125489 0.397674  
C -4.165166 -0.670852 0.791735  
C -4.953286 -0.964474 2.068482  
H -3.123045 -0.993986 0.933222  
H -4.543018 -1.306956 -0.028498  
H -4.655017 -0.297390 2.893606  
H -6.038289 -0.848637 1.924721  
H -4.781848 -2.003494 2.390763

<sup>4</sup>TS9-10C-14

Geometry with 89 atoms:

Total energy: -3202.737514760

Cr -0.194338 -1.451122 0.472410  
P 1.527017 0.144744 -0.775935  
P -1.672257 0.025294 -0.922914  
C -0.759915 0.094900 -2.540591  
C 0.688409 0.592394 -2.407444  
H -0.796272 -0.941485 -2.908305  
H -1.318923 0.699917 -3.270911  
H 1.288094 0.241777 -3.257110  
H 0.715864 1.688679 -2.449655  
C 3.123353 -0.678799 -1.218899  
C 3.226153 -1.358732 -2.449981  
C 4.192921 -0.776272 -0.289153  
C 4.358891 -2.100492 -2.784358  
H 2.413250 -1.322380 -3.176555  
C 5.325546 -1.524427 -0.655245  
C 5.420570 -2.180101 -1.881611  
H 4.407087 -2.612949 -3.747994  
H 6.153172 -1.597665 0.056032  
H 6.315545 -2.756599 -2.127762

C 1.938389 1.822535 -0.146469  
C 1.355543 2.276451 1.045655  
C 2.756256 2.691972 -0.888508  
C 1.588284 3.580028 1.493832  
H 0.709603 1.615656 1.627225  
C 2.983162 3.995311 -0.441878  
H 3.222665 2.348625 -1.815977  
C 2.399862 4.440671 0.749997  
H 1.124656 3.925235 2.420669  
H 3.621851 4.664709 -1.023450  
H 2.578713 5.461126 1.097419  
C -1.845082 1.776909 -0.367729  
C -2.221181 2.069027 0.965725  
C -1.564801 2.836104 -1.253012  
C -2.257297 3.413006 1.372027  
C -1.610591 4.163149 -0.828056  
C -1.948086 4.452534 0.496309  
H -2.536535 3.642138 2.404236  
H -1.379533 4.967224 -1.530315  
H -1.975608 5.487904 0.844394  
C -3.354717 -0.518342 -1.407565  
C -3.559343 -1.866873 -1.751679  
C -4.437344 0.375284 -1.453583  
C -4.825417 -2.310336 -2.139276  
H -2.731237 -2.577432 -1.713110  
C -5.704523 -0.075898 -1.834958  
H -4.294472 1.425457 -1.192189  
C -5.901151 -1.416788 -2.176932  
H -4.973945 -3.360018 -2.404009  
H -6.541066 0.626643 -1.864603  
H -6.893390 -1.767162 -2.471584  
C 1.427867 -2.302063 1.707134  
C 0.787834 -1.247410 2.619492  
C 0.190103 -1.791436 3.923986  
C -0.866272 -2.888667 3.757590  
C -2.040487 -2.507466 2.846451  
C -1.751504 -2.565373 1.339935  
H 1.513707 -3.247983 2.248838  
H 2.418651 -1.985080 1.379017  
H 1.540335 -0.472756 2.836681  
H -0.031989 -0.608742 2.154280  
H 1.022407 -2.168617 4.542176  
H -0.249209 -0.945950 4.481645  
H -1.244180 -3.140067 4.762493  
H -0.397810 -3.814449 3.377784  
H -2.880781 -3.191922 3.069695  
H -2.405859 -1.506993 3.140577  
H -1.535420 -3.614301 1.064884  
H -2.666094 -2.292697 0.787069  
C 0.179288 -2.876756 -1.005183  
C 1.012729 -3.428375 0.012299  
H 0.673987 -2.457552 -1.886590  
H -0.775093 -3.372844 -1.205019  
H 0.632349 -4.289763 0.565152  
H 2.089948 -3.456857 -0.169012  
H -1.309174 2.638313 -2.294171  
C -2.630957 1.004971 1.959746  
C -4.134607 0.999873 2.266195  
H -2.070753 1.154419 2.899160  
H -2.348969 0.011700 1.586456  
H -4.461755 1.963460 2.687565  
H -4.723183 0.811506 1.355602  
H -4.377818 0.210776 2.995158  
C 4.208905 -0.126803 1.083730  
C 5.150970 1.079358 1.185428  
H 4.528710 -0.886851 1.816865  
H 3.197908 0.175691 1.387258  
H 6.189534 0.790956 0.958661  
H 4.861169 1.873338 0.483112  
H 5.131975 1.501814 2.202581

\*TS9-10C-15  
Geometry with 89 atoms:  
Total energy: -3202.739646600  
Cr 0.057177 -0.836500 1.143675  
P -1.706220 -0.219988 -0.481907  
P 1.570677 0.264217 -0.782105  
C 0.345322 0.657095 -2.138054  
C -0.875030 -0.269659 -2.148005  
H 0.031803 1.693469 -1.936845  
H 0.851398 0.672284 -3.115534  
H -1.576979 0.022672 -2.942286  
H -0.582511 -1.314638 -2.334206  
C -2.374101 1.489418 -0.336686  
C -1.811734 2.266720 0.695542  
C -3.324659 2.074297 -1.212128  
C -2.155835 3.604910 0.876709  
H -1.086405 1.808874 1.371241  
C -3.646125 3.429445 -1.015865  
C -3.077219 4.190245 0.005596  
H -1.705807 4.183825 1.686411  
H -4.365522 3.899526 -1.691923  
H -3.354733 5.240944 0.120835  
C -3.126839 -1.366484 -0.551396  
C -3.081786 -2.545298 -1.314678  
C -4.240328 -1.122024 0.271901  
C -4.144881 -3.451847 -1.269524  
H -2.222847 -2.768996 -1.950302  
C -5.297719 -2.033238 0.315306  
H -4.285237 -0.213174 0.876953  
C -5.254126 -3.198050 -0.457260  
H -4.104372 -4.361960 -1.872918  
H -6.160424 -1.829484 0.954178  
H -6.083081 -3.909147 -0.424362  
C 2.780932 -0.908775 -1.527834  
C 3.984986 -1.228769 -0.844128  
C 2.467409 -1.573185 -2.727149  
C 4.823380 -2.205359 -1.403549  
C 3.317248 -2.544044 -3.260614  
C 4.500773 -2.860185 -2.594247  
H 5.754450 -2.464442 -0.897368  
H 3.051677 -3.047898 -4.192921  
H 5.177148 -3.617095 -2.998746  
C 2.443593 1.875061 -0.636071  
C 1.979332 2.813658 0.300932  
C 3.520921 2.214054 -1.471536  
C 2.582380 4.070501 0.401154  
H 1.135443 2.571958 0.950727  
C 4.125711 3.469079 -1.364119  
H 3.894374 1.493772 -2.203575  
C 3.658875 4.398426 -0.428424  
H 2.210859 4.794147 1.130882  
H 4.965195 3.722764 -2.016182  
H 4.134567 5.378696 -0.346164  
C 1.625741 -1.268736 2.667483  
C 1.279260 0.216451 2.866036  
C 0.739807 0.580240 4.259696  
C -0.484024 -0.219960 4.731710  
H -1.624125 -0.373918 3.711874  
C -1.355768 -1.372978 2.576765  
H 1.263676 -1.856537 3.513666  
H 2.708863 -1.382378 2.587745  
H 2.152867 0.836361 2.614115  
H 0.504813 0.662216 2.163028  
H 1.558056 0.463894 4.989977  
H 0.491319 1.656238 4.247737  
H -0.867382 0.274326 5.639641  
H -0.171189 -1.227454 5.058448  
H -2.520858 -0.701199 4.271812  
H -1.895181 0.620307 3.305445  
H -1.013080 -2.334997 3.001734  
H -2.293903 -1.596593 2.045335  
C 0.289634 -2.733121 0.363850  
C 1.379435 -2.769299 1.294964  
H 0.552604 -2.675949 -0.698892  
H -0.605839 -3.321265 0.589940  
H 1.318661 -3.473868 2.127644  
H 2.383274 -2.685511 0.871568  
H 1.548714 -1.341887 -3.267089  
C 4.383555 -0.519233 0.437035  
C 5.270010 -1.310612 1.398976  
H 3.472224 -0.202257 0.966314  
H 4.888973 0.425681 0.171008  
H 4.837161 -2.295511 1.638802  
H 6.277005 -1.483216 0.989415  
H 5.398282 -0.756041 2.341586  
C -4.032464 1.338237 -2.334730  
C -5.546767 1.207729 -2.118701  
H -3.613862 0.334397 -2.473805  
H -3.848239 1.884267 -3.276409  
H -6.011382 0.678179 -2.965421  
H -5.768725 0.638994 -1.203298

H -6.033589 2.191508 -2.030973  
\*TS9-10C-16  
Geometry with 89 atoms:  
Total energy: -3202.735261360  
Cr -0.090605 -0.288344 1.490118  
P 1.712844 -0.314851 -0.449082  
P -1.580242 -0.307943 -0.543189  
C -0.620699 -0.488221 -2.141915  
C 0.828318 -0.953095 -1.964074  
H -1.154031 -1.172795 -2.817594  
H -0.659882 0.501090 -2.618490  
H 0.861333 -2.044855 -1.810269  
H 1.410936 -0.746562 -2.874105  
C 3.291876 -1.262634 -0.490149  
C 3.459775 -2.203680 0.545215  
C 4.274805 -1.161541 -1.509640  
C 4.571246 -3.043792 0.596780  
H 2.702250 -2.283321 1.322884  
C 5.382432 -2.024829 -1.435741  
C 5.538190 -2.952641 -0.406040  
H 4.676470 3.765172 1.410379  
H 6.142188 -1.970379 -2.219960  
H 6.413552 -3.606775 -2.390823  
C 2.159299 1.450914 -0.689441  
C 3.313143 1.947686 -0.053509  
C 1.302256 2.357533 -1.338086  
C 3.605050 3.313646 -0.077302  
H 3.997483 1.263243 0.453713  
C 1.599845 3.723470 -1.361444  
H 0.393258 2.015335 -1.831695  
C 2.749660 4.206630 -0.730927  
H 4.509651 3.680421 0.414115  
H 0.923980 4.411380 -1.875331  
H 2.979767 5.274493 -0.749860  
C -2.645503 1.162005 -0.829246  
C -3.614146 1.274036 -1.859311  
C -2.376464 2.268559 -0.000479  
C -4.273995 2.507641 -2.001671  
C -3.044857 3.480558 -0.163678  
C -4.001781 3.597320 -1.174231  
H -5.018151 2.615392 -2.795264  
H -2.818868 4.323491 0.493325  
H -4.535154 4.539563 -1.322930  
C -2.657519 -1.784865 -0.441291  
C -3.907094 -1.710253 0.195846  
C -2.190337 -3.030332 -0.895689  
C -4.680112 -2.862354 0.363837  
H -4.287468 -0.749127 0.548448  
C -2.968036 -4.178473 -0.727371  
H -1.214825 -3.115407 -1.381740  
C -4.214058 -4.097278 -0.096973  
H -5.654514 -2.791299 0.853225  
H -2.597783 -5.140680 -1.089437  
H -4.821000 -4.996232 0.034374  
C 1.487704 -0.072973 3.020475  
C 1.090696 1.378420 2.725936  
C 0.515696 2.152573 3.917181  
C -0.738665 1.545278 4.551848  
C -1.891999 1.318946 3.564693  
C -1.778227 0.056035 2.701425  
H 1.555054 -0.215401 4.103374  
H 2.450236 -0.324510 2.562465  
H 1.967918 1.900609 2.312707  
H 0.359198 1.530530 1.868349  
H 1.311910 2.243717 4.675707  
H 0.289986 3.179995 3.582225  
H -1.066933 2.222302 5.357829  
H -0.490586 0.589788 5.048976  
H -2.834202 1.266334 4.142562  
H -1.999500 2.219886 2.932138  
H -1.836863 -0.828081 3.361457  
H -2.667612 -0.008301 2.053655  
C -0.112543 -2.342921 1.809778  
C 0.623583 -1.964946 2.971758  
H 0.413540 -2.891867 1.021055  
H -1.169002 -2.602177 1.924396  
H 0.073225 -1.879849 3.911485  
H 1.636330 -2.353715 3.106255  
H -1.630233 2.175762 0.789578  
C -3.978113 0.160030 -2.824251

C -5.441323 -0.291482 -2.726168  
H -3.333018 -0.714076 -2.674811  
H -3.779993 0.516382 -3.850422  
H -5.671761 -0.673604 -1.720390  
H -6.139256 0.532166 -2.942991  
H -5.643322 -1.098555 -3.448016  
C 4.217654 -0.194127 -2.679045  
C 5.388243 0.797196 -2.722550  
H 3.281775 0.376648 -2.671788  
H 4.212141 -0.785048 -3.611903  
H 5.412369 1.422405 -1.817344  
H 6.358946 0.283941 -2.803785  
H 5.291949 1.466850 -3.591805

\*TS9-10C-17

Geometry with 89 atoms:

Total energy: -3202.739233590  
Cr -0.094989 -0.049908 1.536139  
P 1.665897 -0.209002 -0.697596  
P -1.674241 -0.547262 -0.336127  
C -0.696023 -1.393717 -1.667531  
C 0.463704 -0.497447 -2.112699  
H -0.312462 -2.330104 -1.231413  
H -1.337357 -1.671376 -2.514373  
H 1.002420 -0.960737 -2.950940  
H 0.089400 0.474120 -2.468868  
C 3.120637 -1.234785 -1.215066  
C 3.659246 -0.966945 -2.493216  
C 3.681674 -2.261353 -0.425696  
C 4.723640 -1.706304 -2.998346  
H 3.242091 -0.157130 -3.097408  
C 4.751262 -3.005183 -0.963043  
C 5.268455 -2.740640 -2.227569  
H 5.126394 -1.479784 -3.988389  
H 5.183877 -3.809916 -0.362384  
H 6.098561 -3.336920 -2.614414  
C 2.278735 1.512824 -0.921748  
C 1.392742 2.554285 -1.250015  
C 3.606729 1.833497 -0.586197  
C 1.825278 3.883232 -1.244583  
H 0.352276 2.345202 -1.506619  
C 4.034799 3.164150 -0.579724  
H 4.315571 1.041239 -0.334182  
C 3.145942 4.193489 -0.905651  
H 1.123545 4.678464 -1.508706  
H 5.071205 3.395909 -0.321719  
H 3.483008 5.232747 -0.900592  
C -2.448449 0.934687 -1.105379  
C -3.314066 0.925574 -2.228340  
C -2.135002 2.159204 -0.482488  
C -3.822375 2.158473 -2.674294  
C -2.646053 3.369727 -0.947203  
C -3.499088 3.365215 -2.053133  
H -4.497018 2.164408 -3.535088  
H -2.387533 4.303547 -0.442667  
H -3.919990 4.300903 -2.429388  
C -3.030835 -1.688283 0.117581  
C -4.294950 -1.179485 0.463875  
C -2.797437 -3.071472 0.218650  
C -5.308417 -2.041286 0.889959  
H -4.495057 -0.108270 0.390333  
C -3.816473 -3.928710 0.641463  
H -1.820925 -3.493778 -0.027115  
C -5.073371 -3.416662 0.978044  
H -6.288110 -1.634001 1.151342  
H -3.625210 -5.002526 0.708337  
H -5.868500 -4.089175 1.308718  
C 1.597441 0.365799 2.893472  
C 1.267614 1.760743 2.348907  
C 0.790226 2.783938 3.383043  
C -0.467600 2.397705 4.165949  
C -1.677405 2.055723 3.285384  
C -1.688842 0.631722 2.720506  
H 1.755330 0.424740 3.974846  
H 2.496681 -0.038960 2.418747  
H 2.158217 2.138094 1.822463  
H 0.526947 1.793593 1.488569  
H 1.622243 2.968061 4.084077  
H 0.611865 3.739303 2.859562  
H -0.718857 3.239337 4.832169  
H -0.251686 1.543360 4.832612

H -2.594354 2.195913 3.888587  
H -1.756072 2.804654 2.474638  
H -1.744059 -0.084277 3.559610  
H -2.611105 0.476057 2.136291  
C -0.205744 -1.995553 2.271246  
C 0.642047 -1.456492 3.282419  
H 0.227768 -2.714045 1.566353  
H -1.262261 -2.155686 2.503564  
H 0.177712 -1.157147 4.225190  
H 1.645409 -1.870953 3.404454  
H -1.482370 2.155957 0.391321  
C -3.701380 -0.317245 -3.003667  
C -2.996976 -0.408863 -4.365671  
H -4.791697 -0.299367 -3.167138  
H -3.507852 -1.223786 -2.415579  
H -1.900366 -0.416349 -4.257124  
H -3.292613 -1.326784 -4.898124  
H -3.254400 0.449750 -5.005536  
C 3.235592 -2.575302 0.984999  
C 4.275598 -2.170999 2.038591  
H 3.035245 -3.656924 1.070243  
H 2.288027 -2.065335 1.190770  
H 4.499836 -1.093052 1.988030  
H 3.919971 -2.379158 3.056260  
H 5.225874 -2.707621 1.892221

\*TS9-10C-18

Geometry with 89 atoms:

Total energy: -3202.740640020  
Cr -0.524148 -0.801274 1.254292  
P 1.518288 -0.306840 -0.486890  
P -1.758672 -0.237862 -0.868794  
C -0.622802 -0.791253 -2.234176  
C 0.701263 -0.024249 -2.149851  
H -0.451066 -1.872281 -2.113948  
H -1.104748 -0.640295 -3.212307  
H 1.381336 -0.351504 -2.948374  
H 0.526769 1.051964 -2.294914  
C 2.863035 -1.515829 -0.841510  
C 2.763412 -2.760325 -0.191095  
C 3.938693 -1.277707 -1.736877  
C 3.698213 -3.773357 -0.403842  
H 1.938158 -2.936943 0.495017  
C 4.863617 -2.317076 -1.936984  
C 4.755202 -3.547070 -1.287009  
H 3.597770 -4.730396 0.113344  
H 5.693357 -2.152333 -2.629969  
H 5.496079 -4.328466 -1.473601  
C 2.385525 1.246323 -0.017871  
C 3.408745 1.154057 0.944965  
C 1.998371 2.516635 -0.474982  
C 4.030127 2.305255 1.434212  
H 3.735420 0.175031 1.305628  
C 2.628008 3.666419 0.012360  
H 1.203463 2.629717 -1.214606  
C 3.641687 3.566142 0.969084  
H 4.827177 2.215719 2.176539  
H 2.322167 4.646260 -0.362340  
H 4.131407 4.466341 1.347722  
C -2.160293 1.490458 -1.389434  
C -1.857762 2.623131 -0.593712  
C -2.755088 1.657312 -2.653172  
C -2.148987 3.892839 -1.119859  
C -3.040539 2.927676 -3.152497  
C -2.729581 4.048677 -2.380651  
H -1.924848 4.784057 -0.532586  
H -3.504080 3.039004 -4.135438  
H -2.944061 5.052067 -2.756967  
C -3.320752 -1.159690 -1.112627  
C -3.330934 -2.454969 -1.658194  
C -4.528702 -0.596199 -0.662626  
C -4.529608 -3.168023 -1.757484  
H -2.410267 -2.920528 -2.014303  
C -5.722041 -1.314402 -0.761392  
H -4.543185 0.412969 -0.243694  
C -5.725760 -2.601675 -1.308589  
H -4.525806 -4.171516 -2.190065  
H -6.654008 -0.863516 -0.411981  
H -6.660939 -3.161231 -1.387444  
C 0.919171 -1.346379 2.851904  
C 0.728591 0.147061 3.119176

C 0.104655 0.491828 4.475318  
C -1.271681 -0.125310 3.739887  
C -2.323209 0.201345 4.670136  
C -2.275713 -0.675347 2.412654  
H 0.855643 -1.900397 3.793540  
H 1.881756 -1.558939 2.372319  
H 1.701096 0.652275 3.003770  
H 0.132518 0.704106 2.336109  
H 0.810834 0.176808 5.262519  
H 0.028073 1.590525 4.551701  
H -1.617021 0.235878 5.722641  
H -1.183593 -1.222146 4.839217  
H -3.324865 0.097744 4.128952  
H -2.240732 1.273185 3.407755  
H -2.509880 -1.716760 2.696870  
H -3.085333 -0.369511 1.728402  
C -0.815294 -2.841209 0.803745  
C -0.170184 -3.012710 2.053923  
H -0.272940 -3.133746 -0.101748  
H -1.901975 -2.567090 0.796951  
H -0.792274 -3.170199 2.937864  
H 0.789694 -3.532136 2.098762  
H -3.009871 0.780688 -3.254414  
C -1.259147 2.468136 0.790497  
C -0.854472 3.738731 1.529417  
H -0.373479 1.816116 0.707092  
H -1.978973 1.910679 1.410333  
H -0.115141 4.326464 0.964535  
H -1.721333 4.384451 1.739587  
H -0.395644 3.479796 2.496469  
C 4.172479 0.021836 -2.485609  
C 5.431538 0.772038 -2.028813  
H 3.312429 0.695407 -2.392403  
H 4.264402 -0.212802 -3.560425  
H 5.562427 1.696239 -2.613649  
H 5.362489 1.050717 -0.966868  
H 6.338248 0.160916 -2.159901

\*TS9-10C-19

Geometry with 89 atoms:

Total energy: -3202.739594880  
Cr 0.266301 -0.368507 1.418447  
P -1.774168 -0.367856 -0.537663  
P 1.308535 0.838875 -0.570221  
C 0.461702 0.370730 -2.159793  
C -1.063231 0.457910 -2.057959  
H 0.841967 0.993961 -2.983635  
H 0.785601 -0.651854 -2.385335  
H -1.378907 1.508671 -1.995999  
H -1.547697 0.042057 -2.955525  
C -3.491452 0.326685 -0.490908  
C -4.594770 -0.474967 -0.839225  
C -3.700807 1.681689 -0.118703  
C -5.895423 0.026973 -0.796685  
H -4.445324 -1.506783 -1.156778  
C -5.021408 2.160074 -0.084276  
C -6.109715 1.350681 -0.410169  
H -6.735034 -0.616128 -1.071132  
H -5.202597 3.199089 0.197281  
H -7.122974 1.758075 -0.370438  
C -1.955611 -2.141565 -0.993689  
C -2.656727 -2.995746 -0.118694  
C -1.308079 -2.708955 -2.104570  
C -2.703000 -4.372069 -0.345401  
H -3.188120 -2.581002 0.741242  
C -1.345597 -4.090725 -2.323451  
H -0.769228 -2.087114 -2.819956  
C -2.038085 -4.926817 -1.444897  
H -3.259879 -5.014547 0.341055  
H -0.834820 -4.510961 -3.193454  
H -2.067462 -6.004934 -1.619180  
C 3.112761 0.622705 -0.902100  
C 3.675125 -0.646890 -1.187453  
C 3.958260 1.743087 -0.783843  
C 5.068518 -0.735540 -1.343309  
C 5.338595 1.626755 -0.944707  
C 5.898135 0.378407 -1.223890  
H 5.510330 -1.713128 -1.556697  
H 5.972529 2.511269 -0.848252  
H 6.978737 0.270688 -1.345206  
C 1.053308 2.655604 -0.431478

|             |           |           |             |           |           |             |           |           |
|-------------|-----------|-----------|-------------|-----------|-----------|-------------|-----------|-----------|
| C 1.160647  | 3.253150  | 0.837260  | H 1.215985  | 4.290211  | 2.083767  | H 4.604582  | -4.375735 | -1.198923 |
| C 0.764612  | 3.466935  | -1.541853 | C 3.128625  | 3.807077  | 3.617283  | H 6.287950  | -1.268507 | 1.268396  |
| C 0.978815  | 4.629253  | 0.992819  | C -2.034562 | 1.860288  | -0.761687 | H 6.465301  | -3.517313 | 0.238693  |
| H 1.398192  | 2.642574  | 1.708804  | C -2.066265 | 2.526616  | 0.484337  | C 2.274930  | 1.208257  | -1.449749 |
| C 0.570858  | 4.841933  | -1.381529 | C -2.309497 | 2.586105  | -1.941520 | C 1.738017  | 2.444266  | -1.058436 |
| H 0.690971  | 3.041676  | -2.543793 | C -2.300079 | 3.916763  | 0.486786  | C 3.173832  | 1.161330  | -2.529686 |
| C 0.676502  | 5.426177  | -0.115682 | C -2.558947 | 3.954376  | -1.911574 | C 2.091843  | 3.616768  | -1.734743 |
| H 1.070197  | 5.078050  | 1.984749  | C -2.534464 | 4.628696  | -0.685526 | H 1.036745  | 2.498496  | -0.224184 |
| H 0.341271  | 5.459561  | -2.253264 | H -2.304560 | 4.444780  | 1.444225  | C 3.524988  | 2.332264  | -3.204559 |
| H 0.525680  | 6.501533  | 0.006020  | H -2.768318 | 4.492771  | -2.838818 | H 3.613677  | 0.208785  | -2.836676 |
| C -0.540190 | -2.133923 | 2.518087  | H -2.710620 | 5.706461  | -0.644963 | C 2.985670  | 3.561764  | -2.807352 |
| C 0.433199  | -2.772329 | 1.525259  | C -3.084635 | -0.679529 | -1.709062 | H 1.667861  | 4.573533  | -1.420101 |
| C 1.634222  | -3.506050 | 2.130459  | C -2.990072 | -1.733880 | -2.634324 | H 4.227132  | 2.286938  | -4.040667 |
| C 2.533800  | -2.673477 | 3.049277  | C -4.354334 | -0.264112 | -1.270735 | H 3.265489  | 4.477171  | -3.334481 |
| C 3.071192  | -1.379574 | 2.421006  | C -4.146927 | -2.350119 | -3.119449 | C -2.525010 | 1.218772  | -0.778000 |
| C 2.088681  | -0.205515 | 2.436573  | H -2.018201 | -2.082796 | -2.987738 | C -3.779002 | 1.414326  | -0.142072 |
| H -0.384370 | -2.562158 | 3.512918  | C -5.506656 | -0.887721 | -1.754727 | H -1.876524 | 2.327136  | -1.364555 |
| H -1.575366 | -2.305574 | 2.210288  | H -4.447171 | 0.556401  | -0.555419 | C -4.331062 | 2.709011  | -0.156268 |
| H -0.144248 | -3.451292 | 0.877530  | C -5.406335 | -1.930575 | -2.680657 | C -2.444756 | 3.599227  | -1.357504 |
| H 0.849284  | -2.071665 | 0.736528  | H -4.061813 | -3.162577 | -3.845374 | C -3.687109 | 3.792028  | -0.749682 |
| H 1.251175  | -4.381511 | 2.682158  | H -6.487653 | -0.553015 | -1.408738 | H -5.296758 | 2.864333  | 0.332500  |
| H 2.239207  | -3.908509 | 1.299543  | H -6.308651 | -2.415317 | -3.061050 | H -1.915152 | 4.432304  | -1.825843 |
| H 3.376486  | -3.314245 | 3.357755  | C 1.003965  | -2.413012 | 2.095268  | H -4.148486 | 4.782343  | -0.730331 |
| H 1.993123  | -2.425403 | 3.980757  | C 0.571412  | -1.191884 | 2.907091  | C -2.708046 | -1.760398 | -1.031080 |
| H 3.982307  | -1.081911 | 2.973688  | C -0.176049 | -1.506249 | 4.207247  | C -2.700310 | -2.897213 | -0.209680 |
| H 3.419418  | -1.584654 | 1.393527  | C -1.442517 | -2.354519 | 4.050111  | C -3.556125 | -1.721208 | -2.151808 |
| H 1.823746  | 0.024464  | 3.484167  | C -2.479404 | -1.755558 | 3.090616  | C -3.532815 | -3.981971 | -0.503847 |
| H 2.592341  | 0.694995  | 2.044300  | C -2.212012 | -1.986811 | 1.599993  | H -2.049201 | -2.932196 | 0.664101  |
| C -0.698506 | 0.886784  | 2.775076  | H 0.958998  | -3.308050 | 2.723157  | C -4.384044 | -2.806493 | -2.442655 |
| C -0.878202 | -0.330996 | 3.493628  | H 2.019022  | -2.298151 | 1.700824  | H -3.578577 | -0.836552 | -2.793749 |
| H -1.582813 | 1.328811  | 2.312305  | H 1.461238  | -0.574458 | 3.109782  | C -4.374572 | -3.937869 | -1.618254 |
| H 0.041577  | 1.600587  | 3.147382  | H -0.057715 | -0.429210 | 2.349451  | H -3.523513 | -4.862734 | 0.142786  |
| H -0.209064 | -0.527651 | 4.334613  | H 0.530525  | -2.014264 | 4.885708  | H -5.044557 | -2.766998 | -3.312314 |
| H -1.897829 | -0.690092 | 3.654977  | H -0.439055 | -0.551269 | 4.694581  | H -5.026206 | -4.784825 | -1.846483 |
| H 3.535695  | 2.723532  | -0.561315 | H -1.889174 | -2.475176 | 5.050938  | C 1.238757  | 0.202032  | 3.038237  |
| C 2.872974  | -1.922159 | -1.361082 | H -1.180473 | -3.375065 | 3.716519  | C 0.681495  | 1.519986  | 2.466019  |
| C 2.786136  | -2.398975 | -2.817119 | H -3.468399 | -2.185434 | 3.339402  | C -0.150343 | 2.353876  | 3.559505  |
| H 1.859662  | -1.803292 | -0.952415 | H -2.576071 | -0.678323 | 3.305168  | C -1.337737 | 1.628883  | 4.106517  |
| H 3.340195  | -2.716812 | -0.756736 | H -2.300004 | -3.067190 | 1.386458  | C -2.244370 | 0.845662  | 3.144411  |
| H 3.787772  | -2.604595 | -3.225094 | H -3.008607 | -1.505194 | 1.007908  | C -1.668286 | -0.491400 | 2.659059  |
| H 2.194764  | -3.325623 | -2.891461 | C -0.352512 | -3.036218 | -0.566412 | H 0.827431  | 0.034676  | 4.063138  |
| H 2.322360  | -1.640090 | -3.467356 | C 0.230203  | -3.657998 | 0.572559  | H 2.327157  | 0.265453  | 3.098984  |
| C -2.558243 | 2.637081  | 0.173447  | H 0.286341  | -2.860546 | -1.438881 | H 1.513484  | 2.119308  | 2.067035  |
| C -2.791866 | 3.629744  | 1.315493  | H -1.402133 | -3.249624 | -0.789536 | H 0.011840  | 1.452142  | 1.548991  |
| H -2.330253 | 3.204685  | -0.747307 | H -0.421768 | -4.247670 | 1.220530  | H 0.524558  | 2.732293  | 4.241891  |
| H -1.642657 | 2.066572  | 0.383934  | H 1.244082  | -4.059042 | 0.501958  | H -0.519791 | 3.240495  | 2.912031  |
| H -3.574301 | 4.364689  | 1.073200  | H -2.339552 | 2.069489  | -2.903102 | H -1.934140 | 2.390301  | 4.635715  |
| H -3.093344 | 3.116899  | 2.242923  | H -1.914796 | 1.844256  | 1.826624  | H -0.977616 | 0.941906  | 4.892849  |
| H -1.867821 | 4.191460  | 1.518688  | C -3.208812 | 1.867881  | 2.651237  | H -3.201255 | 0.658276  | 3.667569  |

#### <sup>4</sup>TS9-10C-20

Geometry with 89 atoms:  
Total energy: -3202.736156240

|              |           |           |                               |           |           |
|--------------|-----------|-----------|-------------------------------|-----------|-----------|
| Cr -0.399592 | -1.390099 | 0.723180  | H -3.583065                   | 2.894795  | 2.783562  |
| P 1.656136   | -0.025151 | -0.396015 | H -4.004145                   | 1.283087  | 2.162422  |
| P -1.582884  | 0.077914  | -0.982693 | H -3.044038                   | 1.445293  | 3.653946  |
| C -0.341611  | 0.158546  | -2.367513 | C 4.340901                    | 1.454714  | -1.706444 |
| C 0.944244   | 0.847146  | -1.895433 | C 4.433610                    | 1.889475  | -3.175644 |
| H -0.131964  | -0.880023 | -2.665922 | H 5.209423                    | 1.857989  | -1.157672 |
| H -0.761527  | 0.668283  | -3.246802 | H 3.462575                    | 1.919998  | -1.242905 |
| H 1.695499   | 0.826079  | -2.696305 | H 4.445942                    | 2.988264  | -3.253088 |
| H 0.759636   | 1.905419  | -1.657306 | H 5.348797                    | 1.510944  | -3.656775 |
| C 3.223135   | -0.784790 | -0.998582 | H 3.578244                    | 1.518600  | -3.763400 |
| C 3.303403   | -2.187734 | -0.914672 | <sup>4</sup> TS9-10C-21       |           |           |
| C 4.320021   | -0.051248 | -1.521897 | Geometry with 89 atoms:       |           |           |
| C 4.442210   | -2.880864 | -1.324119 | Total energy: -3202.738120980 |           |           |
| H 2.457046   | -2.745327 | -0.519106 | Cr -0.065207                  | -0.414989 | 1.338021  |
| C 5.462214   | -0.772551 | -1.910904 | P 1.759403                    | -0.333648 | -0.588806 |
| C 5.532726   | -2.162992 | -1.818257 | P -1.567153                   | -0.364442 | -0.688376 |
| H 4.477837   | -3.970245 | -1.250355 | C -0.484296                   | -0.413769 | -2.222433 |
| H 6.322689   | -0.220761 | -2.299049 | C 0.808455                    | -1.188016 | -1.944464 |
| H 6.440410   | -2.684416 | -2.132275 | H -1.052724                   | -0.889816 | -3.034220 |
| C 2.175606   | 1.271175  | 0.800277  | H -0.248721                   | 0.605515  | -2.555713 |
| C 3.250939   | 1.004980  | 1.668687  | H 0.583156                    | -2.215772 | -1.618918 |
| C 1.445657   | 2.459731  | 0.967087  | H 1.423822                    | -1.251780 | -2.855608 |
| C 3.589688   | 1.913314  | 2.674551  | C 3.300158                    | -1.314639 | -0.378401 |
| H 3.838102   | 0.090556  | 1.552483  | C 3.410115                    | -2.594778 | -0.955261 |
| C 1.790085   | 3.366607  | 1.974202  | C 4.348959                    | -0.824608 | 0.440096  |
| H 0.600363   | 2.694743  | 0.318418  | C 4.539269                    | -3.386274 | -0.740304 |
| C 2.860155   | 3.096731  | 2.831829  | H 2.612772                    | -2.992102 | -1.584231 |
| H 4.432130   | 1.696275  | 3.336040  | C 5.474782                    | -1.639806 | 0.638070  |

#### <sup>4</sup>TS9-10C-22

Geometry with 89 atoms:  
Total energy: -3202.735939810

|              |           |           |
|--------------|-----------|-----------|
| Cr -0.099753 | 0.292181  | 1.541920  |
| P 1.720888   | -0.286989 | -0.308800 |
| P -1.552241  | -0.568880 | -0.314597 |
| C -0.577597  | -1.217924 | -1.777420 |

C 0.909299 -1.470965 -1.504306  
H -1.059261 -2.131224 -2.156791  
H -0.696781 -0.456956 -2.561322  
H 1.053384 -2.448172 -1.014364  
H 1.460728 -1.508293 -2.454052  
C 3.376119 -1.038919 -0.015044  
C 3.622839 -1.448773 1.310502  
C 4.377918 -1.233096 -1.001621  
C 4.832901 -2.032281 1.683497  
H 2.850601 -1.308334 2.064172  
C 5.594670 -1.809151 -0.595607  
C 5.829303 -2.205199 0.720986  
H 4.996207 -2.342155 2.718229  
H 6.380688 -1.949406 -1.342783  
H 6.790155 -2.648809 0.993495  
C 2.017329 1.321301 -1.152450  
C 3.219073 2.021733 -0.937851  
C 0.981948 1.959647 -1.861110  
C 3.383626 3.317957 -1.433557  
H 4.036687 1.552159 -0.386630  
C 1.152076 3.255058 -2.357062  
H 0.023607 1.466702 -2.025336  
C 2.352308 3.939571 -2.144501  
H 4.326361 3.843879 -1.263115  
H 0.336446 3.730340 -2.907632  
H 2.483379 4.953178 -2.530630  
C -2.748463 0.600766 -1.072395  
C -3.744536 0.240401 -2.014696  
C -2.595347 1.950090 -0.699262  
C -4.574295 1.261748 -2.510538  
C -3.418659 2.946474 -1.220764  
C -4.423097 2.594050 -2.125593  
H -5.358648 0.996993 -3.225102  
H -3.283118 3.985838 -0.913074  
H -5.090011 3.357463 -2.534021  
C -2.488735 -1.993917 0.351389  
C -3.773240 -1.819287 0.892789  
C -1.874210 -3.255418 0.428038  
C -4.433856 -2.895443 1.490942  
H -4.268302 -0.847413 0.833930  
C -2.540456 -4.328283 1.025047  
H -0.869198 -3.408663 0.027056  
C -3.820903 -4.150506 1.558859  
H -5.435888 -2.751866 1.902481  
H -2.055826 -5.306399 1.074644  
H -4.341034 -4.990085 2.026121  
C 1.426765 1.242279 2.819052  
C 0.892032 2.407735 1.971724  
C 0.221146 3.535095 2.763505  
C -0.956199 3.111977 3.646560  
C -2.082452 2.392345 2.893023  
C -1.826525 0.911733 2.584007  
H 1.492864 1.561803 3.863624  
H 2.419639 0.934064 2.474611  
H 1.726265 2.802623 1.371037  
H 0.176179 2.133281 1.128921  
H 0.996774 4.015511 3.384140  
H -0.119427 4.303379 2.047647  
H -1.354302 4.019806 4.129462  
H -0.600086 2.468917 4.471707  
H -3.004641 2.469393 3.499887  
H -2.307853 2.955360 1.968755  
H -1.785897 0.355785 3.537920  
H -2.700234 0.504743 2.048381  
C 0.086011 -1.452358 2.636286  
C 0.773868 -0.573399 3.532458  
H 0.671903 -2.212065 2.107169  
H -0.936545 -1.752642 2.882430  
H 0.210388 -0.192733 4.387710  
H 1.818286 -0.787187 3.775524  
H -1.819038 2.220631 0.017813  
C -3.943205 -1.159374 -2.563146  
C -3.488012 -1.299956 -4.022932  
H -5.014841 -1.411165 -2.496035  
H -3.425880 -1.903301 -1.945052  
H -4.036772 -0.611864 -4.685042  
H -2.414708 -1.079251 -4.134532  
H -3.661895 -2.325490 -4.385841  
C 4.223813 -0.896288 -2.472228  
C 4.122002 -2.143116 -3.362875  
H 5.098305 -0.301895 -2.786877

H 3.354860 -0.248838 -2.640600  
H 5.025757 -2.768022 -3.288128  
H 3.264898 -2.774110 -3.077664  
H 3.998647 -1.857049 -4.419606

\*TS9-10C-23  
Geometry with 89 atoms:  
Total energy: -3202.734284640  
Cr -0.177191 -1.089092 -1.187547  
P 1.839323 -0.005821 0.172938  
P -1.396796 0.476971 0.422206  
C -0.181306 0.984887 1.767770  
C 1.052456 0.077505 1.854983  
H 0.133033 2.007097 1.508433  
H -0.699721 1.048329 2.735576  
H 1.760645 0.457446 2.606352  
H 0.783305 -0.950499 2.145933  
C 2.389411 1.723192 -0.145691  
C 1.635502 2.414031 -1.115587  
C 3.439755 2.396802 0.530462  
C 1.907134 3.740675 -1.445651  
H 0.809246 1.905292 -1.609846  
C 3.711590 3.725035 0.157286  
C 2.965671 4.395000 -0.812687  
H 1.298509 4.252512 -2.194439  
H 4.530734 4.249723 0.657214  
H 3.208255 5.429614 -1.067954  
C 3.328972 -1.052858 0.328475  
C 4.285011 -0.999087 -0.702970  
C 3.496262 -1.982207 1.369673  
C 5.391171 -1.850305 -0.684981  
H 4.170848 -0.277998 -1.517542  
C 4.602912 -2.837881 1.378452  
H 2.776436 -2.036759 2.189393  
C 5.551231 -2.774512 0.353855  
H 6.132303 -1.792355 -1.486046  
H 4.726001 -3.552919 2.195629  
H 6.416233 -3.441856 0.365376  
C -2.756416 -0.381646 1.336448  
C -4.083047 -0.493294 0.851336  
C -2.389055 -1.086833 2.502358  
C -4.990078 -1.278977 1.585804  
C -3.305006 -1.870501 3.202046  
C -4.620550 -1.962433 2.741947  
H -6.017076 -1.363276 1.219539  
H -2.990783 -2.403559 4.102485  
H -5.353553 -2.571399 3.276510  
C -2.006183 2.103989 -0.165159  
C -1.983121 2.402882 -1.536467  
C -2.441027 3.078484 0.748679  
C -2.392825 3.660341 -1.988835  
H -1.651513 1.649251 -2.254350  
C -2.842742 4.336421 0.293633  
H -2.472982 2.856263 1.818429  
C -2.819795 4.628259 -1.074540  
H -2.377046 3.883801 -3.058305  
H -3.180965 5.089558 1.009383  
H -3.137723 5.612078 -1.428302  
C 1.051069 -2.908777 -1.546929  
C 0.371767 -3.174739 -0.193144  
C -0.569229 -4.384203 -0.129107  
C -1.739370 -4.372015 -1.119005  
C -2.584326 -3.089288 -1.097037  
C -1.964392 -1.918361 -1.867744  
H 0.898885 -3.774801 -2.197587  
H 2.122873 -2.743647 -1.402359  
H 1.167851 -3.274674 0.561440  
H -0.222567 -2.314831 0.254605  
H 0.035776 -5.294360 -0.279690  
H -0.968454 -4.443354 0.898505  
H -2.375420 -5.242441 -0.887942  
H -1.366156 -4.539937 -2.145566  
H -3.573362 -3.324180 -1.534464  
H -2.796132 -2.807618 -0.049939  
H -1.777975 -2.238478 -2.909144  
H -2.682385 -1.084998 -1.937882  
C 0.322624 -0.397744 -3.070958  
C 0.861846 -1.721976 -3.190629  
H 1.037971 0.429547 -3.034149  
H -0.608039 -0.181472 -3.606567  
H 0.282294 -2.441190 -3.773222

H 1.940340 -1.819895 -3.339788  
H -1.368268 -1.035676 2.883587  
C -4.610136 0.171749 -0.404829  
C -5.516110 1.377004 -0.123688  
H -5.178573 -0.582831 -0.973549  
H -3.788876 0.479522 -1.061196  
H -6.392822 1.086226 0.476816  
H -4.976995 2.161513 0.427217  
H -5.881510 1.815500 -1.065873  
C 4.249488 1.814175 1.671818  
C 3.903545 2.448357 3.027346  
H 5.320253 1.978203 1.463193  
H 4.122049 0.727725 1.732039  
H 4.503772 1.996153 3.833035  
H 4.100792 3.531856 3.029157  
H 2.838954 2.311847 3.279419

\*TS9-10C-24  
Geometry with 89 atoms:  
Total energy: -3202.7377995160  
Cr 0.091707 0.452996 1.305600  
P -1.791309 0.305456 -0.565635  
P 1.536623 0.390259 -0.777981  
C 0.393313 0.391465 -2.267804  
C -0.897721 1.157298 -1.961069  
H 0.927458 0.850297 -3.112124  
H 0.155849 -0.638715 -2.563456  
H -0.675169 2.191913 -1.656221  
H -1.542288 1.199922 -2.852999  
C -3.347441 1.252762 -0.321830  
C -3.505673 2.519972 -0.915223  
C -4.358274 0.750780 0.535990  
C -4.647723 3.286729 -0.679737  
H -2.735584 2.925283 -1.572419  
C -5.498370 1.540606 0.753746  
C -5.649765 2.793637 0.158711  
H -4.751605 4.266518 -1.151800  
H -6.282605 1.160292 1.414563  
H -6.547496 3.385564 0.352864  
C -2.294173 -1.261537 -1.388162  
C -3.236365 -1.254561 -2.431576  
C -1.701744 -2.475820 -1.008855  
C -3.575949 -2.442730 -3.081847  
H -3.718604 -0.319705 -2.728643  
C -2.043388 -3.665619 -1.660905  
H -0.966845 -2.501640 -0.202771  
C -2.981055 -3.650195 -2.696799  
H -4.311906 -2.427992 -3.889527  
H -1.575431 -4.604820 -1.355769  
H -3.251268 -4.579188 -3.204805  
C 2.549510 -1.155549 -0.913638  
C 3.848152 -1.284167 -0.344120  
C 1.932802 -2.285581 -1.485441  
C 4.468908 -2.542703 -0.412206  
C 2.571515 -3.525002 -1.530523  
C 3.851892 -3.651144 -0.994710  
H 5.467120 -2.665092 0.009282  
H 2.065637 -4.380651 -1.984034  
H 4.372955 -4.611289 -1.021859  
C 2.620754 1.813283 -1.185455  
C 2.613479 2.961952 -0.382505  
C 3.440961 1.769405 -2.326883  
C 3.418720 4.056592 -0.715679  
H 1.985986 3.000014 0.508420  
C 4.245119 2.861732 -2.654015  
H 3.463186 0.872339 -2.952065  
C 4.235256 4.007198 -1.847990  
H 3.409201 4.948218 -0.084075  
H 4.885455 2.819075 -3.538521  
H 4.867294 4.860769 -2.105081  
C -1.134543 -0.196635 3.052905  
C -0.554940 -1.497099 2.465542  
C 0.343215 -2.301849 3.420396  
C 1.529455 -1.537843 4.028116  
C 2.370753 -0.713991 3.040534  
C 1.720738 0.599351 2.586173  
H -0.694852 -0.010602 4.035340  
H -2.217676 -0.294380 3.151255  
H -1.380171 -2.124901 2.097009  
H 0.076639 -1.406408 1.524250  
H -0.286754 -2.704603 4.231086

H 0.721378 -3.174448 2.860140  
H 2.173003 -2.279866 4.528701  
H 1.175037 -0.868333 4.831866  
H 3.335288 -0.489179 3.533325  
H 2.636020 -1.342570 2.169445  
H 1.373545 1.171103 3.466684  
H 2.461220 1.242765 2.082488  
C -0.501049 2.405547 1.631873  
C -1.348337 1.776102 2.606495  
H -0.990213 2.821214 0.743211  
H 0.337958 2.998864 2.008178  
H -1.167354 2.007725 3.658484  
H -2.410216 1.709962 2.357823  
H 0.928786 -2.219087 -1.902768  
C 4.574275 -0.124660 0.316042  
C 5.680558 -0.490434 1.305286  
H 3.840396 0.509018 0.830003  
H 4.996861 0.518513 -0.474431  
H 5.320874 -1.184821 2.080651  
H 6.549048 -0.953840 0.812010  
H 6.043887 0.418429 1.809516  
C -4.279170 -0.602118 1.216629  
C -5.229122 -1.649439 0.621188  
H -4.519298 -0.468551 2.285369  
H -3.249599 -0.989280 1.183025  
H -6.277236 -1.318067 0.689395  
H -5.004183 -1.836354 -0.438818  
H -5.141834 -2.605424 1.161720

\*TS9-10C-25

Geometry with 89 atoms:

Total energy: -3202.737078790

Cr -0.240411 -1.472828 0.445457  
P 1.483719 0.105152 -0.809547  
P -1.716861 0.039531 -0.917284  
C -0.823947 0.051170 -2.548878  
C 0.637607 0.518167 -2.446596  
H -0.885567 -0.990792 -2.893365  
H -1.377930 0.650725 -3.287211  
H 1.217117 0.124728 -3.291321  
H 0.690230 1.611126 -2.527290  
C 3.089063 -0.708684 -1.234893  
C 3.217380 -1.391756 -2.461377  
C 4.146300 -0.789055 -0.289592  
C 4.365433 -2.118071 -2.777575  
H 2.413052 -1.370582 -3.197956  
C 5.294984 -1.520751 -0.637522  
C 5.416320 -2.178081 -1.860862  
H 4.434046 -2.633494 -3.738406  
H 6.113602 -1.580005 0.085410  
H 6.323136 -2.741578 -2.093446  
C 1.881988 1.797821 -0.210937  
C 1.322945 2.251731 0.991785  
C 2.666608 2.674769 -0.979640  
C 1.541899 3.562731 1.424173  
H 0.707499 1.582933 1.595932  
C 2.881928 3.985264 -0.548507  
H 3.116031 2.332344 -1.915879  
C 2.319407 4.431093 0.653338  
H 1.094466 3.906590 2.359538  
H 3.494767 4.660518 -1.150724  
H 2.488310 5.457668 0.987420  
C -1.885933 1.812663 -0.430903  
C -2.297719 2.177377 0.874361  
C -1.605624 2.821864 -1.373043  
C -2.390369 3.545291 1.184186  
C -1.691153 4.171526 -1.037520  
C -2.083075 4.535143 0.252411  
H -2.722343 3.840339 2.182444  
H -1.458389 4.933717 -1.784456  
H -2.160837 5.589303 0.529434  
C -3.407143 -0.520885 -1.353075  
C -3.572236 -1.821257 -1.864913  
C -4.536936 0.291082 -1.165042  
C -4.843761 -2.294130 -2.193005  
H -2.707076 -2.472524 -2.006231  
C -5.809651 -0.191443 -1.486216  
H -4.429617 1.303791 -0.772064  
C -5.966173 -1.481080 -2.000661  
H -4.959283 -3.304498 -2.592799  
H -6.682508 0.448376 -1.334931

H -6.962226 -1.854923 -2.249932  
C 1.364889 -2.350098 1.682622  
C 0.724269 -1.299367 2.597638  
C 0.103105 -1.847921 3.888782  
C -0.973194 -2.922767 3.701463  
C -2.128494 -2.519478 2.774542  
C -1.813452 -2.581548 1.275066  
H 1.438805 -3.301382 2.216600  
H 2.360165 -2.036904 1.363672  
H 1.482113 -0.535221 2.833223  
H -0.080800 -0.644891 2.128052  
H 0.922042 -2.248820 4.509791  
H -0.323392 -1.000402 4.451205  
H -1.369068 -3.171433 4.700154  
H -0.517160 -3.855748 3.323768  
H -2.982183 -3.191532 2.984389  
H -2.484087 -1.514129 3.060869  
H -1.593202 -3.631625 1.007650  
H -2.713740 -2.307542 0.700323  
C 0.127222 -2.892478 -1.041480  
C 0.950773 -3.458243 -0.023707  
H 0.631934 -2.478439 -1.919909  
H -0.831065 -3.378771 -1.246382  
H 0.560826 -4.320642 0.520768  
H 2.028656 -3.494249 -0.199871  
H -1.321974 2.566859 -2.393616  
C -2.686885 1.167499 1.936331  
C -1.944186 1.333438 3.267294  
H -2.545677 0.143673 1.559549  
H -3.772190 1.256835 2.118510  
H -2.279061 0.581312 3.996926  
H -0.855401 1.223638 3.141632  
H -2.121056 2.322760 3.715090  
C 4.129631 -0.137791 1.082220  
C 5.031511 1.098009 1.191645  
H 4.466049 -0.887020 1.818989  
H 3.106138 0.131689 1.375791  
H 4.718993 1.884715 0.490902  
H 4.995406 1.515915 2.210215  
H 6.079466 0.843288 0.967581

\*TS9-10C-26

Geometry with 89 atoms:

Total energy: -3202.735218280

Cr -0.470907 -1.073993 0.934200  
P 1.655959 -0.346710 -0.380378  
P -1.404469 0.566241 -0.847106  
C -0.357399 0.188098 -2.328423  
C 1.124722 0.428760 -2.009144  
H -0.534873 -0.869686 -2.577083  
H -0.665904 0.784015 -3.200776  
H 1.750138 0.003468 -2.806412  
H 1.333710 1.507380 -1.979789  
C 2.965222 -1.559727 -0.842496  
C 2.708080 -2.911796 -0.547292  
C 4.172363 -1.200199 -1.497136  
C 3.620010 -3.913815 -0.878871  
H 1.774630 -3.188414 -0.060639  
C 5.071205 -2.230733 -1.821924  
C 4.810344 -3.567779 -1.520601  
H 3.396993 -4.956453 -0.640945  
H 6.001819 -1.970198 -2.334011  
H 5.534967 -4.338896 -1.793697  
C 2.528534 0.952945 0.588924  
C 2.411137 2.329144 0.344319  
C 3.288912 0.518906 1.691371  
C 3.046174 3.252308 1.181600  
H 1.821645 2.703232 -0.492649  
C 3.917366 1.443009 2.527733  
H 3.407493 -0.549434 1.886269  
C 3.797246 2.814462 2.275272  
H 2.947332 4.320518 0.973758  
H 4.510364 1.090083 3.374977  
H 4.292279 3.538261 2.927080  
C -1.191772 2.386975 -0.617991  
C -0.814393 2.976146 0.609141  
C -1.405190 3.205307 -1.747138  
C -0.642112 4.373394 0.649601  
C -1.227991 4.584383 -1.683926  
C -0.837454 5.171217 -0.474551  
H -0.341694 4.837291 1.593141

H -1.396790 5.199290 -2.570955  
H -0.689394 6.251972 -0.409344  
C -3.149014 0.387235 -1.364534  
C -4.139916 0.919231 -0.518646  
C -3.534980 -0.342711 -2.500953  
C -5.491780 0.721324 -0.804036  
H -3.854205 1.501352 0.361930  
C -4.891087 -0.535454 -2.783342  
H -2.788214 -0.771288 -3.171955  
C -5.870112 -0.009579 -1.935830  
H -6.252710 1.141398 -0.141815  
H -5.181720 -1.101762 -3.671529  
H -6.928424 -0.165266 -2.158568  
C -2.264805 -1.234336 2.186770  
C -3.327420 -2.232389 2.632918  
C -3.983595 -3.039168 1.507183  
C -3.078132 -3.927575 0.638380  
C -2.286917 -3.235747 -0.491536  
C -0.870237 -2.756069 -0.176278  
H -2.179648 -2.881371 2.881853  
H -2.595089 -0.825726 1.212172  
H -2.935406 -2.923944 3.400367  
H -4.126279 -1.666898 3.146278  
H -4.750479 -3.681343 1.972868  
H -4.536890 -2.349051 0.843726  
H -3.733442 -4.676261 0.163471  
H -2.389233 -4.509291 1.278882  
H -2.200067 -3.962203 -1.322445  
H -2.896984 -2.413366 -0.902758  
H -0.316599 -3.549352 0.359150  
H -0.321342 -2.565096 -1.115760  
C 0.757195 -1.863447 2.491213  
C -0.502739 -2.264997 2.969848  
H 1.272256 -1.033650 2.988916  
H 1.405994 -2.595139 2.002992  
H -0.855798 -3.273541 2.742814  
H -0.878830 -1.862720 3.9212808  
H -1.725514 2.756942 -2.690709  
C -0.630091 2.220268 1.907734  
C -1.835043 2.345989 2.844856  
H 0.276651 2.590192 2.010942  
H -0.428680 1.154437 1.705194  
H -2.746376 1.932042 2.385363  
H -1.657012 1.816275 3.793961  
H -2.034420 3.402623 3.082007  
C 4.571589 0.216977 -1.865089  
C 5.723737 0.768330 -1.013854  
H 3.719255 0.902663 -1.790583  
H 4.874982 0.221863 -2.926160  
H 5.991973 1.785787 -1.339919  
H 5.445484 0.815724 0.049096  
H 6.623536 0.139068 -1.099674

\*TS9-10C-27

Geometry with 89 atoms:

Total energy: -3202.736561210

Cr 0.269718 -1.064559 1.117348  
P 1.705449 0.369120 -0.611170  
P -1.480703 -0.190583 -0.488357  
C -0.669891 0.360175 -2.093700  
C 0.816157 -0.014421 -2.206410  
H -1.227392 -0.050621 -2.947802  
H -0.795578 1.451726 -2.125457  
H 0.931681 -1.091204 -2.390498  
H 1.282298 0.503853 -3.058089  
C 3.528290 0.230312 -0.889941  
C 4.339881 1.351889 -0.620988  
C 4.142391 -0.998652 -1.238350  
C 5.729760 1.276290 -0.708507  
H 3.884479 2.301890 -0.339475  
C 5.543710 -1.047098 -1.324044  
C 6.336831 0.069875 -1.064051  
H 6.334460 2.161478 -0.497361  
H 6.019239 -1.993393 -1.597781  
H 7.424845 -0.002751 -1.134377  
C 1.416556 2.182939 -0.444678  
C 1.159896 2.733927 0.820451  
C 1.444836 3.038542 -1.562149  
C 0.924491 4.104006 0.969819  
H 1.145685 2.094106 1.703304  
C 1.202614 4.405210 -1.413886

H 1.665194 2.644851 -2.556756  
C 0.938929 4.940734 -0.147829  
H 0.721880 4.514284 1.961856  
H 1.223414 5.057137 -2.290721  
H 0.747186 6.010557 -0.034972  
C -2.489361 1.236999 0.077094  
C -3.481062 1.880936 -0.703822  
C -2.194603 1.717446 1.366905  
C -4.119850 3.004462 -0.150744  
C -2.850569 2.826493 1.897414  
C -3.816162 3.477331 1.126241  
H -4.878497 3.521293 -0.744991  
H -2.606656 3.179774 2.901953  
H -4.336258 4.356429 1.518994  
C -2.662468 -1.512435 -0.948531  
C -3.813424 -1.717705 -0.168180  
C -2.379873 -2.402234 -1.998885  
C -4.669263 -2.787562 -0.443331  
H -4.053734 -1.033564 0.648389  
C -3.241107 -3.467172 -2.272983  
H -1.484148 -2.275203 -2.611555  
C -4.386995 -3.663588 -1.495912  
H -5.564600 -2.932532 0.166030  
H -3.013822 -4.148436 -3.097061  
H -5.059190 -4.497605 -1.711187  
C 2.106080 -1.693407 2.172109  
C 1.757196 -0.380926 2.876194  
C 1.435321 -0.491085 4.369761  
C 0.238588 -1.383245 4.715752  
C -1.058417 -1.017731 3.976347  
C -1.171278 -1.577084 2.552925  
H 2.357922 -2.451120 2.920277  
H 2.947440 -1.568129 1.480734  
H 2.581920 0.337124 2.708580  
H 0.895356 0.201153 2.419952  
H 2.338336 -0.856058 4.887937  
H 1.247856 0.526331 4.755580  
H 0.078020 -1.317282 5.804392  
H 0.482789 -2.442020 4.514090  
H -1.910856 -1.395427 4.572145  
H -1.178424 0.083254 3.979674  
H -1.167987 -2.680662 2.603708  
H -2.150968 -1.300289 2.128479  
C 0.161553 -2.935874 0.185459  
C 1.137191 -3.267989 1.162214  
H 0.470722 -2.889341 -0.864326  
H -0.868866 -3.264640 0.340849  
H 0.798168 -3.786781 2.061948  
H 2.136099 -3.562178 0.832219  
H -1.438709 1.206349 1.964967  
C -3.913140 1.428659 -2.085891  
C -5.361055 0.921634 -2.135317  
H -3.254127 0.639430 -2.466689  
H -3.805007 2.280609 -2.779558  
H -6.073613 1.694101 -1.806376  
H -5.632652 0.629985 -3.162271  
H -5.493650 0.041949 -1.487921  
C 3.365737 -2.255763 -1.564513  
C 3.288890 -2.547598 -3.069499  
H 2.352646 -2.191006 -1.148341  
H 3.843667 -3.111767 -1.059519  
H 4.293824 -2.704459 -3.491511  
H 2.695717 -3.455484 -3.265503  
H 2.831186 -1.711162 -3.620553

### \*3A-01

Geometry with 65 atoms:  
Total energy: -2888.457350300  
Cr -0.143117 -0.176494 1.564525  
C -0.307501 -2.197381 1.521860  
C -1.588455 -2.583997 2.255729  
H -2.441658 -2.516414 1.559399  
C -1.804554 -1.600537 3.414367  
C -1.756149 -0.165467 2.862851  
H -2.698306 0.079057 2.341041  
H -1.611409 0.597619 3.654616  
H -1.003106 -1.748437 4.164119  
H -2.751082 -1.813172 3.945919  
H -1.558590 -3.632574 2.608899  
H -0.156670 -2.679944 0.542511  
H 0.597165 -2.397692 2.141111

P -1.466881 0.228493 -0.433862  
C -1.986824 1.980669 -0.524781  
C -1.883598 2.786051 0.623007  
C -2.259631 4.131921 0.577897  
C -2.745103 4.680114 -0.612037  
C -2.859076 3.882002 -1.756794  
C -2.483810 2.538171 -1.716486  
H -2.590430 1.923122 -2.613393  
H -3.246901 4.308893 -2.684745  
H -3.042150 5.731001 -0.648268  
H -2.179906 4.748681 1.476154  
H -1.532284 2.358437 1.566434  
C -2.957321 -0.791046 -0.689844  
C -2.844627 -2.107382 -1.171446  
C -3.980499 -2.912159 -1.279885  
C -5.232128 -2.417948 -0.898221  
C -5.347138 -1.112894 -0.410339  
C -4.216345 -0.299263 -0.304941  
H -4.318323 0.719969 0.073902  
H -6.322570 -0.722651 -0.110468  
H -6.118210 -3.051990 -0.979656  
H -3.885624 -3.932514 -1.658755  
H -1.873895 -2.520643 -1.454062  
C -0.378513 -0.033484 -1.917635  
C 0.979381 0.647189 -1.712782  
P 1.822721 0.050990 -0.163170  
C 3.181508 1.258177 0.072821  
C 2.846573 2.509002 0.623657  
C 3.828737 3.483382 0.810391  
C 5.156640 3.211785 0.462568  
C 5.496592 1.967401 -0.076545  
C 4.515146 0.991320 -0.274571  
H 4.791087 0.023322 -0.698558  
H 6.533171 1.753730 -0.348543  
H 5.927437 3.971259 0.614325  
H 3.559180 4.453874 1.234121  
H 1.810851 2.731416 0.901066  
C 2.607174 -1.546989 -0.582260  
C 3.221799 -2.263411 0.461613  
C 3.826130 -3.496214 0.212632  
C 3.808280 -4.037606 -1.077906  
C 3.190668 -3.337908 -2.117547  
C 2.595079 -2.095772 -1.874406  
H 2.128043 -1.562548 -2.704084  
H 3.175403 -3.755496 -3.127180  
H 4.275628 -5.006103 -1.271537  
H 4.307645 -4.039501 1.029134  
H 3.235877 -1.853684 1.475736  
H 0.857868 1.734334 -1.578438  
H 1.637284 0.510897 -2.584879  
H -0.255033 -1.119347 -2.047169  
H -0.887884 0.344369 -2.817663

### \*3A-02

Geometry with 65 atoms:  
Total energy: -2888.454448610  
Cr -0.033146 -0.746458 1.388349  
C 0.212823 -2.658202 0.785622  
C 0.419605 -2.903865 2.273366  
H 0.942938 -3.850150 2.497802  
C -0.918350 -2.739766 3.028813  
C -1.465520 -1.327333 2.744252  
H -2.538714 -1.298134 2.506000  
H -1.282110 -0.633593 3.592987  
H -0.776333 -2.932230 4.105975  
H -1.613685 -3.508830 2.654132  
H 1.152391 -2.135205 2.669187  
H -0.692516 -3.129183 0.377641  
H 1.093847 -2.861864 0.158608  
P -1.526424 0.051448 -0.364827  
C -2.519419 1.539481 0.013472  
C -2.651167 1.973554 1.342903  
C -3.389717 3.124788 1.635776  
C -3.998952 3.845680 0.605383  
C -3.876118 3.413902 -0.720860  
C -3.142314 2.264781 -1.018380  
H -3.057020 1.932174 -2.056066  
H -4.356580 3.974322 -1.526446  
H -4.574934 4.745540 0.834777  
H -3.490151 3.455918 2.672090  
H -2.190033 1.407289 2.155927

C -2.703149 -1.218625 -0.952121  
C -4.004802 -1.272378 -0.427069  
C -4.877131 -2.289216 -0.824270  
C -4.458628 -3.259352 -1.740135  
C -3.161631 -3.212134 -2.261359  
C -2.283923 -2.199500 -1.867239  
H -1.272384 -2.181494 -2.278172  
H -2.829547 -3.967205 -2.977893  
H -5.143862 -4.052077 -2.049664  
H -5.890935 -2.319972 -0.417937  
H -4.345807 -0.515887 0.283401  
C -0.491781 0.532391 -1.850705  
C 0.895547 -0.125005 -1.866766  
P 1.763439 0.104956 -0.235193  
C 2.215791 1.884027 -0.208655  
C 3.458616 2.352016 -0.667631  
C 3.745107 3.719435 -0.642143  
C 2.797083 4.630750 -0.164823  
C 1.558616 4.172573 0.295305  
C 1.271354 2.805384 0.281386  
H 0.301656 2.463295 0.654987  
H 0.815715 4.878620 0.674267  
H 3.026208 5.699009 -0.146295  
H 4.715552 4.074903 -0.997213  
H 4.207120 1.648357 -1.039477  
C 3.333227 -0.822298 -0.347709  
C 4.077946 -0.965836 0.838110  
C 5.278202 -1.677253 0.838079  
C 5.743137 -2.264570 -0.344063  
C 5.007120 -2.131460 -1.524457  
C 3.807773 -1.411250 -1.531304  
H 3.254694 -1.313096 -2.467182  
H 5.367777 -2.588173 -2.449259  
H 6.679450 -2.827766 -0.343373  
H 5.849510 -1.779008 1.763926  
H 3.720727 -0.513671 1.768460  
H 1.502909 0.295924 -2.683252  
H 0.822557 -1.213003 -2.023375  
H -1.045296 0.302838 -2.773855  
H -0.388942 1.626960 -1.797438

### \*3A-03

Geometry with 65 atoms:  
Total energy: -2888.453506190  
Cr -0.089845 -0.524368 1.496096  
C -1.556294 -0.809011 2.900741  
C -1.186636 -2.241358 3.327217  
H -1.103680 -2.353317 4.422120  
C 0.143588 -2.627456 2.641822  
C -0.001241 -2.509930 1.131767  
H 0.878950 -2.835965 0.556702  
H -0.929172 -2.945511 0.735787  
H 0.540844 -3.604317 2.970964  
H 0.950777 -1.914705 2.982820  
H -1.957531 -2.953952 2.989839  
H -1.245925 -0.060020 3.662868  
H -2.624997 -0.651812 2.696424  
P -1.509637 0.133415 -0.376804  
C -2.670561 1.523758 -0.143992  
C -3.610225 1.849432 -1.137904  
C -4.461852 2.941012 -0.960333  
C -4.386170 3.709870 0.207319  
C -3.459437 3.385126 1.201796  
C -2.603703 2.293595 1.028187  
H -1.895802 2.031939 1.819006  
H -3.406941 3.976857 2.118791  
H -5.058040 4.560713 0.344136  
H -5.191460 3.191041 -1.734265  
H -3.684396 1.243728 -2.044835  
C -2.519196 -1.270199 -0.974596  
C -3.604738 -1.680078 -0.178668  
C -4.372164 -2.783793 -0.551754  
C -4.060455 -3.495900 -1.715981  
C -2.981445 -3.095788 -2.507707  
C -2.210531 -1.987290 -2.141218  
H -1.374998 -1.694981 -2.779696  
H -2.736297 -3.645411 -3.419773  
H -4.660718 -4.361717 -2.005644  
H -5.217526 -3.090026 0.069081  
H -3.853954 -1.131183 0.732835  
C -0.403490 0.649998 -1.783655

C 0.922670 -0.122314 -1.793106  
P 1.811415 0.082458 -0.164553  
C 2.340088 1.836560 -0.205555  
C 1.784423 2.739437 0.715744  
C 2.121691 4.095873 0.671656  
C 3.021290 4.557691 -0.292373  
C 3.584134 3.663801 -1.212043  
C 3.246341 2.310302 -1.171658  
H 3.696628 1.616937 -1.886741  
H 4.291064 4.024888 -1.962935  
H 3.288617 5.616640 -0.326946  
H 1.683915 4.789949 1.392975  
H 1.083118 2.388444 1.478752  
C 3.340033 -0.913324 -0.315663  
C 4.515852 -0.487170 0.329091  
C 5.664232 -1.281450 0.298216  
C 5.653524 -2.510257 -0.369641  
C 4.486928 -2.943721 -1.005986  
C 3.333772 -2.154351 -0.977761  
H 2.435142 -2.516792 -1.481068  
H 4.471724 -3.901915 -1.531026  
H 6.553803 -3.128933 -0.394236  
H 6.572973 -0.936037 0.797250  
H 4.541621 0.473843 0.848735  
H 1.572980 0.222855 -2.612133  
H 0.746319 -1.199394 -1.934774  
H -0.936067 0.549818 -2.742025  
H -0.223931 1.726690 -1.632699

#### \*3A-04

Geometry with 65 atoms:  
Total energy: -2888.452585780  
Cr -0.186219 -0.631579 1.447316  
C -0.369853 -2.622580 1.006756  
C -0.421480 -3.087371 2.474218  
H -1.341960 -3.658474 2.679898  
C -0.423495 -1.835534 3.387089  
C -1.519042 -0.873256 2.962536  
H -2.478692 -1.357710 2.734383  
H -1.656195 -0.001931 3.623520  
H 0.589075 -1.321307 3.250657  
H -0.384205 -2.078190 4.462832  
H 0.433413 -3.734500 2.727077  
H -1.285599 -2.835251 0.434796  
H 0.512728 -2.979441 0.453440  
P 1.696950 -0.053245 -0.253200  
C 2.809500 -1.417837 -0.763088  
C 4.059137 -1.572606 -0.137544  
C 4.875903 -2.659935 -0.457130  
C 4.454494 -3.606393 -1.396591  
C 3.210692 -3.461272 -2.017907  
C 2.389154 -2.375425 -1.702458  
H 1.421248 -2.283673 -2.198780  
H 2.875592 -4.195335 -2.754071  
H 5.095505 -4.455520 -1.645340  
H 5.849107 -2.765344 0.028599  
H 4.405328 -0.836529 0.592230  
C 2.791495 1.373300 0.085336  
C 3.662266 1.880732 -0.896183  
C 4.465491 2.986800 -0.614941  
C 4.411285 3.593822 0.645989  
C 3.552852 3.092958 1.627923  
C 2.745046 1.986152 1.348082  
H 2.082002 1.595802 2.126345  
H 3.512593 3.561190 2.614277  
H 5.043444 4.458293 0.863105  
H 5.140316 3.376507 -1.380936  
H 3.719120 1.406464 -1.879454  
C 0.761485 0.439617 -1.802636  
C -0.635399 -0.192059 -1.897608  
P -1.617911 0.140361 -0.354250  
C -3.223408 -0.701942 -0.549950  
C -4.272541 -0.318080 0.305699  
C -5.502804 -0.973267 0.245937  
C -5.696883 -2.022296 -0.660213  
C -4.656377 -2.412245 -1.506902  
C -3.421115 -1.757937 -1.454353  
H -2.624808 -2.080569 -2.127238  
H -4.803412 -3.229609 -2.217010  
H -6.660407 -2.535507 -0.705371  
H -6.313645 -0.664515 0.910030

H -4.127868 0.499635 1.016608  
C -1.969253 1.933715 -0.412827  
C -2.817822 2.472238 -1.396248  
C -3.034710 3.849818 -1.452066  
C -2.409406 4.698785 -0.530388  
C -1.568438 4.169343 0.452085  
C -1.351087 2.789722 0.512345  
H -0.698178 2.382640 1.289250  
H -1.083774 4.828889 1.175719  
H -2.583965 5.776485 -0.576525  
H -3.697543 4.264298 -2.215475  
H -3.318497 1.813101 -2.110258  
H -0.569697 -1.286019 -2.002717  
H -1.180329 0.194821 -2.773588  
H 0.676845 1.536870 -1.757674  
H 1.362003 0.194377 -2.691923

#### \*3A-05

Geometry with 65 atoms:  
Total energy: -2888.454224090  
Cr -0.173116 -0.517955 1.459123  
C -0.183564 -2.520192 1.207765  
C 0.142161 -2.511878 2.692949  
H 0.604846 -3.444479 3.060385  
C -1.104238 -2.073065 3.495340  
C -1.579085 -0.713175 2.941880  
H -2.652026 -0.669965 2.704300  
H -1.339402 0.126714 3.627386  
H -0.872841 -2.035450 4.573192  
H -1.880791 -2.843767 3.360534  
H 0.966255 -1.758867 2.874459  
H -1.159881 -2.968881 0.979860  
H 0.610494 -2.908706 0.552878  
P 1.719252 0.070400 -0.274132  
C 2.723368 -1.402174 -0.681099  
C 2.621629 -2.089706 -1.900371  
C 3.359226 -3.259935 -2.111726  
C 4.204786 -3.750112 -1.113691  
C 4.309698 -3.070550 0.105779  
C 3.567190 -1.910091 0.325303  
H 3.652869 -1.389804 1.284070  
H 4.969598 -3.449131 0.890136  
H 4.781372 -4.662497 -1.283572  
H 3.272767 -3.787208 -3.064856  
H 1.970816 -1.724873 -2.697374  
C 2.887818 1.459410 -0.032068  
C 4.222671 1.428276 -0.466080  
C 5.045088 2.542058 -0.271755  
C 4.543344 3.690885 0.347916  
C 3.213257 3.727786 0.780404  
C 2.390137 2.614795 0.597522  
H 1.351282 2.651142 0.941337  
H 2.818167 4.622686 1.267337  
H 5.190271 4.558873 0.496536  
H 6.083425 2.512137 -0.610887  
H 4.623288 0.537022 -0.954050  
C 0.796799 0.546244 -1.825210  
C -0.563311 -0.153210 -1.939089  
P -1.588447 0.099557 -0.408637  
C -3.140285 -0.816621 -0.703529  
C -3.071837 -2.179063 -1.048107  
C -4.243675 -2.912997 -1.239263  
C -5.490848 -2.299693 -1.077303  
C -5.562768 -0.948643 -0.726918  
C -4.393715 -0.205099 -0.539475  
H -4.463141 0.850916 -0.270062  
H -6.534721 -0.465829 -0.600047  
H -6.407091 -2.876596 -1.224181  
H -4.182300 -3.969261 -1.512239  
H -2.104983 -2.673383 -1.167751  
C -2.007072 1.879695 -0.348110  
C -2.084122 2.683048 -1.498753  
C -2.392640 4.040890 -1.386189  
C -2.632348 4.607122 -0.129542  
C -2.565498 3.812997 1.019363  
C -2.250737 2.455513 0.913226  
H -2.214352 1.837009 1.814289  
H -2.759726 4.250010 2.001748  
H -2.874551 5.669425 -0.046807  
H -2.448617 4.659072 -2.285412  
H -1.907046 2.257555 -2.488749

H -0.443287 -1.243531 -2.039816  
H -1.119633 0.187977 -2.826451  
H 0.667414 1.637773 -1.756610  
H 1.422275 0.360074 -2.711997

#### \*3A-06

Geometry with 65 atoms:  
Total energy: -2888.453189610  
Cr -0.171403 -0.466691 1.511956  
C -0.266368 -2.486229 1.160712  
C -0.271058 -2.894309 2.644622  
H -1.147205 -3.518133 2.888189  
C -0.346382 -1.603881 3.496193  
C -1.496127 -0.729622 3.029873  
H -2.419527 -1.283978 2.813278  
H -1.694835 0.155020 3.656582  
H 0.634994 -1.040178 3.319831  
H -0.283998 -1.784691 4.582859  
H 0.629792 -3.469709 2.911473  
H -1.187699 -2.747418 0.618612  
H 0.612236 -2.834239 0.597398  
P -1.612326 0.182582 -0.337382  
C -2.078707 1.951641 -0.383894  
C -1.535963 2.836846 0.561357  
C -1.843476 4.199658 0.510783  
C -2.699716 4.683279 -0.482111  
C -3.250770 3.804772 -1.423078  
C -2.943730 2.443973 -1.376443  
H -3.386232 1.760918 -2.106409  
H -3.926372 4.182606 -2.194259  
H -2.944285 5.747558 -0.520777  
H -1.418651 4.882013 1.250773  
H -0.876382 2.465792 1.351506  
C -3.156325 -0.759957 -0.567563  
C -4.163551 -0.598264 0.401720  
C -5.352234 -1.321708 0.305771  
C -5.544402 -2.219543 -0.2751034  
C -4.546055 -2.386768 -1.713641  
C -3.353188 -1.660843 -1.626278  
H -2.588971 -1.806162 -2.391738  
H -4.693071 -3.084896 -2.541215  
H -6.474550 -2.788339 -0.822861  
H -6.130925 -1.187493 1.060440  
H -0.017412 0.098018 1.231456  
C -0.591748 -0.056475 -1.872498  
C 0.767166 0.645474 -1.730035  
P 1.715025 0.066767 -0.230517  
C 2.997035 1.352072 0.006242  
C 2.791854 2.331278 0.992181  
C 3.724482 3.355888 1.175080  
C 4.872218 3.403170 0.378273  
C 5.086113 2.426776 -0.601497  
C 4.154279 1.403794 -0.789865  
H 4.331408 0.640398 -1.551586  
H 5.985281 2.461462 -1.221481  
H 5.605285 4.200457 0.523550  
H 3.558358 4.113221 1.945093  
H 1.900065 2.295555 1.624893  
C 2.617702 -1.439925 -0.750426  
C 3.485313 -2.029521 0.188148  
C 4.164679 -3.207877 -0.121073  
C 3.974957 -3.821464 -1.365209  
C 3.107245 -3.248218 -2.297407  
C 2.430329 -2.061261 -1.994654  
H 1.759766 -1.632047 -2.741366  
H 2.955424 -3.723205 -3.269739  
H 4.503596 -4.747036 -1.605488  
H 4.843232 -3.651441 0.611596  
H 3.637868 -1.560146 1.164798  
H 0.630880 1.729802 -1.588657  
H 1.378605 0.521640 -2.637504  
H -0.461945 -1.141963 -2.008887  
H -1.142980 0.330420 -2.744333

#### \*3A-07

Geometry with 65 atoms:  
Total energy: -2888.452007980  
Cr -0.031390 -0.325270 1.525561  
C -1.399945 -0.302277 3.046867  
C -0.945614 -1.590178 3.760445  
H -0.758374 -1.438617 4.837306



C 0.330759 -2.112069 3.060609  
C 0.054750 -2.338305 1.582391  
H 0.885833 -2.778520 1.010883  
H -0.897269 -2.844698 1.371969  
H 0.784203 -2.983888 3.565068  
H 1.148223 -1.336248 3.162535  
H -1.717707 -2.372951 3.676968  
H -1.088345 0.609182 3.602575  
H -2.483722 -0.230490 2.874428  
P 1.784788 0.043866 -0.280598  
C 3.360208 -0.870909 -0.439506  
C 3.477756 -2.017534 -1.244464  
C 4.674958 -2.739629 -1.269431  
C 5.761962 -2.330631 -0.492694  
C 5.650467 -1.192602 0.313576  
C 4.457797 -0.468035 0.344325  
H 4.387042 0.422906 0.973788  
H 6.497761 -0.865555 0.921240  
H 6.696137 -2.896824 -0.515741  
H 4.756103 -3.625918 -1.903432  
H 2.645087 -2.359791 -1.861922  
C 2.222746 1.821232 -0.286200  
C 3.108612 2.390854 -1.216351  
C 3.366592 3.762581 -1.183425  
C 2.745089 4.575053 -0.226348  
C 1.864975 4.016672 0.704990  
C 1.609327 2.643060 0.673999  
H 0.923162 2.200048 1.407391  
H 1.382980 4.647411 1.455583  
H 2.952571 5.647669 -0.205015  
H 4.058829 4.202175 -1.905613  
H 3.605569 1.760150 -1.958054  
C 0.879582 -0.204411 -1.888943  
C -0.463770 0.534235 -1.863292  
P -1.510478 0.056069 -0.399711  
C -2.389881 -1.480999 -0.856703  
C -2.173014 -2.156671 -2.067087  
C -2.864329 -3.341888 -2.341936  
C -3.774227 -3.856318 -1.415583  
C -3.992894 -3.186120 -0.205754  
C -3.301010 -2.008604 0.077201  
H -3.469291 -1.494759 1.027054  
H -4.704275 -3.584804 0.521439  
H -4.314735 -4.780327 -1.634660  
H -2.691490 -3.860701 -3.287949  
H -1.471931 -1.770108 -2.808874  
C -2.789304 1.358884 -0.314668  
C -2.729642 2.324896 0.702060  
C -3.671588 3.356765 0.745871  
C -4.678088 3.425670 -0.221511  
C -4.746170 2.460372 -1.233032  
C -3.807489 1.428159 -1.281858  
H -3.873848 0.670431 -2.066883  
H -5.537295 2.509890 -1.985185  
H -5.416852 4.230080 -0.184391  
H -3.623179 4.103129 1.542473  
H -1.957154 2.269318 1.472710  
H -1.028539 0.378685 -2.795708  
H -0.310264 1.620715 -1.763853  
H 1.504589 0.140175 -2.728079  
H 0.723212 -1.287820 -2.008196

<sup>3</sup>A-08

Geometry with 65 atoms:  
Total energy: -2888.453593570  
Cr 0.146913 -0.401160 1.517758  
C 0.221207 -2.438131 1.325977  
C 0.077715 -2.742756 2.827493  
H -0.875019 -3.248024 3.053614  
C 0.164553 -1.404902 3.602561  
C 1.365619 -0.597835 3.132323  
H 1.558551 0.319283 3.713136  
H 2.283931 -1.189368 3.010820  
H 0.066991 -1.523088 4.695449  
H -0.786415 -0.820520 3.366172  
H 0.890654 -3.398822 3.181200  
H -0.601694 -2.815276 0.700383  
H 1.187916 -2.748460 0.904722  
P 1.618649 0.130286 -0.361997  
C 3.111086 -0.892615 -0.616385  
C 3.004158 -2.189515 -1.150283

C 4.140453 -2.993227 -1.270529  
C 5.387134 -2.517209 -0.852407  
C 5.496387 -1.231823 -0.313368  
C 4.365468 -0.420473 -0.193379  
H 4.464391 0.583354 0.225796  
H 6.468008 -0.854816 0.014878  
H 6.273555 -3.149163 -0.945813  
H 4.049358 -3.997694 -1.690875  
H 2.038588 -2.585154 -1.472751  
C 2.161104 1.877028 -0.394988  
C 2.652067 2.473516 -1.570194  
C 3.045834 3.812651 -1.563458  
C 2.958811 4.566515 -0.386828  
C 2.482363 3.978247 0.787598  
C 2.085503 2.637299 0.784912  
H 1.735523 2.177608 1.713897  
H 2.423707 4.560745 1.710064  
H 3.269518 5.614068 -0.386456  
H 3.426781 4.270486 -2.479503  
H 2.738587 1.893296 -2.492221  
C 0.574689 -0.082042 -1.889418  
C -0.752229 0.675590 -1.754320  
P -1.723205 0.126438 -0.259961  
C -2.624686 -1.389091 -0.747161  
C -2.603817 -1.923323 -2.044687  
C -3.276061 -3.118325 -2.324386  
C -3.977411 -3.784617 -1.316628  
C -4.003794 -3.257277 -0.020047  
C -3.323948 -2.073067 0.265524  
H -3.336863 -1.677397 1.285622  
H -4.549195 -3.775095 0.772597  
H -4.502357 -4.716767 -1.539022  
H -3.252397 -3.526332 -3.337761  
H -2.068354 -1.417684 -2.850353  
C -2.977014 1.444964 -0.055801  
C -2.569993 2.635994 0.572492  
C -3.470006 3.691615 0.731071  
C -4.786687 3.561250 0.275739  
C -5.198629 2.375876 -0.340903  
C -4.299255 1.318895 -0.510144  
H -4.629480 0.397242 -0.994349  
H -6.226704 2.272276 -0.696515  
H -5.493448 4.384629 0.404511  
H -3.145534 4.615289 1.216484  
H -1.542874 2.746064 0.935325  
H -1.364035 0.582295 -2.664854  
H -0.576348 1.754066 -1.609496  
H 1.137782 0.252786 -2.774427  
H 0.395576 -1.162126 -2.009329

<sup>3</sup>A-09

Geometry with 65 atoms:  
Total energy: -2888.454301790  
Cr 0.023287 -0.709565 1.416461  
C 1.423242 -1.297525 2.774625  
C 0.280755 -2.210290 3.199607  
H 0.363356 -2.608538 4.226057  
C 0.042454 -3.313370 2.142118  
C -0.193864 -2.648722 0.773723  
H 0.550204 -2.912050 0.008751  
H -1.209416 -2.809976 0.378447  
H -0.811762 -3.942001 2.441621  
H 0.935212 -3.959931 2.117522  
H -0.677271 -1.603617 3.274868  
H 2.305344 -1.842097 2.408689  
H 1.712534 -0.547111 3.529020  
P 1.534988 0.073976 -0.346346  
C 2.647087 -1.249471 -0.942667  
C 3.291982 -2.081148 -2.017396  
C 3.127138 -3.138429 -2.390979  
C 4.315381 -3.376020 -1.694574  
C 4.669645 -2.553470 -0.619520  
C 3.839379 -1.497196 -0.240057  
H 4.124599 -0.859229 0.600055  
H 5.598775 -2.734168 -0.073612  
H 4.966295 -4.202611 -1.989316  
H 2.845765 -3.778126 -3.230937  
H 1.363438 -1.920259 -2.569117  
C 2.605685 1.514950 -0.003916  
C 2.586015 2.124226 1.260938  
C 3.372090 3.254433 1.508498

C 4.181343 3.777968 0.496829  
C 4.209983 3.170097 -0.764321  
C 3.427534 2.042504 -1.016171  
H 3.462693 1.567096 -1.999918  
H 4.847543 3.575313 -1.553800  
H 4.796491 4.659937 0.691148  
H 3.355500 3.721687 2.495934  
H 1.970060 1.710572 2.063622  
C 0.497508 0.601304 -1.809934  
C -0.883980 -0.066837 -1.842837  
P -1.763675 0.130708 -0.209885  
C -3.321807 -0.810562 -0.354250  
C -3.899176 -1.170201 -1.583605  
C -5.095479 -1.893719 -1.611381  
C -5.726442 -2.258392 -0.418392  
C -5.157243 -1.904076 0.809471  
C -3.958313 -1.190058 0.841323  
H -3.513940 -0.925321 1.805510  
H -5.645210 -2.190299 1.744299  
H -6.661526 -2.823094 -0.444650  
H -5.537430 -2.171241 -2.571393  
H -3.426342 -0.889286 -2.526884  
C -2.224341 1.908212 -0.177065  
C -1.281441 2.830120 0.314852  
C -1.567512 4.197538 0.325267  
C -2.803902 4.655832 -0.140355  
C -3.751160 3.743975 -0.617786  
C -3.465754 2.376119 -0.639366  
H -4.213566 1.673151 -1.013648  
H -4.720296 4.099154 -0.976700  
H -3.031705 5.724431 -0.126403  
H -0.824857 4.903936 0.704112  
H -0.313040 2.488008 0.691421  
H -0.808105 -1.151259 -0.203329  
H -1.490187 0.369003 -2.651954  
H 0.388721 1.692505 -1.712219  
H 1.048687 0.417963 -2.744868

<sup>3</sup>A-10

Geometry with 65 atoms:  
Total energy: -2888.454326710  
Cr 0.023038 -0.689577 1.409013  
C 1.375863 -1.287637 2.808436  
C 0.134242 -2.042709 3.251369  
H 0.109928 -2.346401 4.311665  
C -0.182765 -3.204229 2.276086  
C -0.228844 -2.646006 0.842726  
H 0.605756 -2.968008 0.203947  
H -1.186706 -2.818669 0.328671  
H -1.136494 -3.677582 2.558741  
H 0.609897 -3.963395 3.383377  
H -0.757719 -1.326100 3.218847  
H 2.197073 -1.936995 2.473354  
H 1.734416 -0.530942 3.524472  
P 1.548304 0.049694 -0.358427  
C 2.642825 -1.292712 -0.943549  
C 2.271695 -2.133999 -2.005000  
C 3.092744 -3.205520 -2.369238  
C 4.281990 -3.447694 -1.676032  
C 4.651321 -2.615837 -0.613217  
C 3.835444 -1.545091 -0.243276  
H 4.131592 -0.899757 0.587492  
H 5.581115 -2.800452 -0.069725  
H 4.921957 -4.285294 -1.963618  
H 2.799834 -3.852623 -3.199520  
H 1.342696 -1.967985 -2.554508  
C 2.635381 1.478349 -0.013920  
C 2.652075 2.059105 1.264602  
C 3.451302 3.178972 1.571146  
C 4.237002 3.721201 0.496878  
C 4.229588 3.141685 -0.777890  
C 3.434288 2.024233 -1.034781  
H 3.441160 1.571889 -2.029878  
H 4.848939 3.561378 -1.574254  
H 4.861746 4.595578 0.694886  
H 3.462735 3.623615 2.515079  
H 2.055168 1.630136 2.073428  
C 0.522082 0.585458 -1.826610  
C -0.869174 -0.062502 -1.857656  
P -1.749070 0.146702 -0.225576  
C -3.309704 -0.789699 -0.373112

C -3.890078 -1.133498 -1.605656  
C -5.085810 -1.857438 -1.640293  
C -5.713164 -2.238738 -0.450558  
C -5.141189 -1.900053 0.780388  
C -3.942889 -1.185099 0.818936  
H -3.496296 -0.932749 1.785211  
H -5.626521 -2.199384 1.712459  
H -6.647622 -2.804224 -0.481968  
H -5.529859 -2.122530 -2.602856  
H -3.419377 -0.839982 -2.546109  
C -2.197543 1.926834 -0.195256  
C -1.242540 2.842805 0.284771  
C -1.519919 4.211927 0.298103  
C -2.759024 4.677774 -0.152865  
C -3.717456 3.771934 -0.619190  
C -3.441117 2.402215 -0.643530  
H -4.197479 1.703750 -1.008955  
H -4.688426 4.133237 -0.966880  
H -2.980148 5.747734 -0.136120  
H -0.768703 4.913856 0.668225  
H -0.271967 2.494164 0.650210  
H -0.808819 -1.148466 -2.035623  
H -1.469201 0.379440 -2.668153  
H 0.428850 1.678651 -1.735199  
H 1.071294 0.387823 -2.759849

<sup>4</sup>3A-11

Geometry with 65 atoms:  
Total energy: -2888.453531680  
Cr 0.206812 -0.745440 1.388101  
C 1.510145 -1.096759 2.911805  
C 0.326779 -1.945265 3.340343  
H 0.252792 -2.163726 4.419351  
C 0.203717 -3.202366 2.444690  
C 0.285094 -2.751671 0.974882  
H 1.241719 -3.000953 0.493733  
H -0.548579 -3.090139 0.342105  
H -0.740569 -3.727704 2.661393  
H 1.027240 -3.889986 2.700529  
H -0.627372 -1.333314 3.184942  
H 2.420114 -1.669655 2.685175  
H 1.729251 -0.247337 3.579114  
P 1.636043 -0.022038 -0.434969  
C 3.258343 -0.813548 -0.713425  
C 4.439756 -0.165878 -0.313991  
C 5.673875 -0.803062 -0.465130  
C 5.741512 -2.087434 -1.012858  
C 4.568426 -2.737314 -1.409180  
C 3.330147 -2.108646 -1.258006  
H 2.427056 -2.637673 -1.569585  
H 4.615170 -3.741197 -1.838004  
H 6.708388 -2.582357 -1.131408  
H 6.587020 -0.289162 -0.155121  
H 4.402330 0.839128 0.111471  
C 1.921290 1.784334 -0.357946  
C 1.955333 2.596308 -1.504657  
C 2.127121 3.977093 -1.380702  
C 2.278252 4.558211 -0.116651  
C 2.262138 3.755440 1.027820  
C 2.081092 2.374711 0.908819  
H 2.072478 1.752095 1.808168  
H 2.388540 4.203594 2.016223  
H 2.412622 5.638718 -0.024852  
H 2.146066 4.602553 -2.276415  
H 1.847123 2.158846 -2.499438  
C 0.623502 -0.324401 -1.961822  
C -0.746922 0.360177 -1.870537  
P 1.664706 -0.047210 -0.282249  
C -2.935817 -1.285722 -0.729077  
C -3.630751 -1.235541 -1.950836  
C -4.613194 -2.184459 -2.240992  
C -4.917074 -3.187665 -1.313883  
C -4.240133 -3.237596 -0.092098  
C -3.252593 -2.292250 0.199106  
H -2.726377 -2.341897 1.155427  
H -4.476553 -4.017492 0.635567  
H -5.684772 -3.930135 -1.544862  
H -5.146891 -2.138207 -3.193370  
H -3.418793 -0.447434 -2.677695  
C -2.572923 1.503515 0.100839  
C -1.812039 2.656506 0.377263

C -2.444842 3.852066 0.721286  
C -3.840791 3.907883 0.806412  
C -4.599386 2.763719 0.545097  
C -3.972075 1.563413 0.194738  
H -4.577960 0.678439 -0.010056  
H -5.689538 2.802310 0.610590  
H -4.336376 4.843211 1.077568  
H -1.844443 4.741921 0.925925  
H -0.719909 2.629105 0.317538  
H -1.366396 0.085480 -2.736504  
H -0.636598 1.454165 -1.895058  
H 1.173681 0.002788 -2.858375  
H 0.508089 -1.417496 -2.038082

<sup>4</sup>3A-12

Geometry with 65 atoms:  
Total energy: -2888.453784500  
Cr 0.213369 -0.738379 1.428008  
C 1.536238 -1.130160 2.915576  
C 0.484762 -2.180686 3.240698  
H 0.499552 -2.558573 4.277885  
C 0.517020 -3.308541 2.182016  
C 0.441786 -2.671456 0.781295  
H 1.355929 -2.801911 0.182882  
H -0.435626 -2.987292 0.195736  
H -0.312756 -4.012547 2.354552  
H 1.457440 -3.869386 2.311651  
H -0.546706 -1.701814 3.200076  
H 2.513846 -1.553741 2.646740  
H 1.642834 -0.331527 3.668897  
P 1.620895 0.175781 -0.330579  
C 3.254465 -0.603694 -0.542388  
C 4.198591 -0.419625 0.484818  
C 5.455092 -2.109261 0.399190  
C 5.777927 -1.817747 -0.704472  
C 4.842308 -2.008898 -1.724026  
C 3.583029 -1.403935 -1.648424  
H 2.870434 -1.563638 -2.459487  
H 5.091283 -2.629960 -2.587854  
H 6.760494 -2.291393 -0.768151  
H 6.183691 -0.867851 1.199219  
H 3.948774 0.196173 1.352464  
C 1.893651 1.986744 -0.348405  
C 0.952248 2.817541 0.284355  
C 1.094744 4.206556 0.242288  
C 2.185203 4.775744 -0.422538  
C 3.130084 3.954235 -1.047224  
C 2.987837 2.564988 -1.014150  
H 3.733132 1.932108 -1.501447  
H 3.984710 4.397693 -1.563944  
H 2.302291 5.861729 -0.451217  
H 0.354157 4.842588 0.732995  
H 0.094685 2.385422 0.806528  
C 0.647190 -0.167207 -1.878259  
C -0.766841 0.424075 -1.785011  
P -1.687479 -0.082007 -0.230318  
C -2.823959 -1.422012 -0.752464  
C -2.416874 -2.376499 -1.701077  
C -3.254062 -3.447238 -2.026874  
C -4.500228 -3.579850 -1.407259  
C -4.908395 -2.636277 -0.459103  
C -4.075899 -1.564127 -0.128772  
H -4.411266 -0.830253 0.608246  
H -5.883338 -2.731998 0.025170  
H -5.153468 -4.417186 -1.664006  
H -2.929403 -4.180088 -2.769459  
H -1.446717 -2.293080 -2.195625  
C -2.760710 1.355959 0.133932  
C -2.706335 1.949045 1.405817  
C -3.487635 3.071956 1.697920  
C -4.329380 3.607594 0.719807  
C -4.393693 3.018842 -0.549228  
C -3.615898 1.897848 -0.842836  
H -3.678943 1.440472 -1.833649  
H -5.055605 3.435125 -1.312521  
H -4.940229 4.484972 0.945985  
H -3.439577 3.525249 2.690881  
H -2.054359 1.534266 2.180649  
H -1.360481 0.151752 -2.670780  
H -0.715935 1.523399 -1.754752  
H 1.179896 0.245229 -2.749702

H 0.615582 -1.262939 -1.987909

<sup>4</sup>3A-13

Geometry with 65 atoms:  
Total energy: -2888.453317910  
Cr 0.071732 -0.830942 1.354196  
C 1.004038 -1.474159 3.043625  
C -0.314792 -2.227015 3.131433  
H -0.620777 -2.537906 4.144960  
C -0.355045 -3.371077 2.090271  
C 0.000823 -2.777062 0.715181  
H 0.969159 -3.111374 3.035497  
H -0.779939 -2.920066 -0.046779  
H -1.352557 -3.838452 2.084096  
H 0.370209 -4.142960 2.397403  
H -1.166981 -1.512713 2.868861  
H 1.882815 -2.130303 2.978825  
H 1.145996 -0.706438 3.822312  
P 1.676760 -0.029309 -0.306015  
C 3.306571 -0.809299 -0.573156  
C 4.173235 -0.317840 -1.565345  
C 5.411937 -0.925850 -1.772968  
C 5.795257 -2.022363 -0.991043  
C 4.940505 -2.507136 0.002375  
C 3.698013 -1.902065 0.215603  
H 3.036579 -2.274227 0.999366  
H 5.241254 -3.358001 0.618340  
H 6.766537 -2.495662 -1.154773  
H 6.083676 -0.540426 -2.543784  
H 3.888119 0.547887 -2.169076  
C 1.973394 -2.170369 -0.117178  
C 1.970811 2.673672 -1.193782  
C 2.167791 4.038451 -0.965938  
C 2.374263 4.513418 0.333107  
C 2.390773 3.619445 1.408681  
C 2.189846 2.255087 1.185977  
H 2.211726 1.561447 2.002240  
H 2.560906 3.984770 2.424297  
H 2.525967 5.581483 0.506889  
H 2.160090 4.734127 -1.808544  
H 1.812738 2.325701 -2.216786  
C 0.768238 -0.227955 -1.918471  
C -0.596828 0.474263 -1.904205  
H 1.812738 2.325701 -2.216786  
C -2.836436 -1.204082 -0.835734  
C -2.776845 -1.935650 -2.031945  
C -3.677299 -2.981484 -2.262976  
C -4.641900 -3.306029 -1.306528  
C -4.703191 -2.584937 -0.108216  
C -3.801300 -1.547818 0.131060  
H -3.855306 -0.995636 1.073904  
H -5.453989 -2.834868 0.645270  
H -5.344146 -4.122431 -1.491127  
H -3.621559 -3.543720 -3.198220  
H -2.029090 -1.707917 -2.794072  
C -2.528651 1.627420 -0.054779  
C -1.808531 2.666566 0.564868  
C -2.427823 3.888456 0.833642  
C -3.773259 4.079042 0.499293  
C -4.493504 3.048012 -0.111681  
C -3.876370 1.824975 -0.392753  
H -4.447206 1.027882 -0.873954  
H -5.543418 3.195855 -0.376281  
H -4.261083 5.032475 0.716218  
H -1.859151 4.691012 1.309563  
H -0.754299 2.530072 0.826973  
H -1.168986 0.261547 -2.820016  
H -0.466683 1.565578 -1.869000  
H 1.391647 0.138694 -2.749282  
H 0.665552 -1.316489 -2.057114

<sup>4</sup>3A-14

Geometry with 65 atoms:  
Total energy: -2888.452014450  
Cr -0.226841 -0.810330 1.364672  
C -0.487961 -2.717835 0.659594  
C -0.374266 -3.407664 2.031991  
H -1.226090 -4.086915 2.203952  
C -0.393682 -2.321722 3.137235  
C -1.503805 -1.317539 2.864364  
H -2.462368 -1.781844 2.594191

H -1.639839 -0.558547 3.652878  
H 0.607221 -1.781446 3.115000  
H -0.376935 -2.744256 4.157022  
H 0.543922 -4.011992 2.112787  
H -1.482440 -2.822454 0.201289  
H 0.283588 -3.014677 -0.066017  
P 1.658502 -0.078269 -0.265517  
C 2.872060 -1.330979 -0.841542  
C 3.061122 -2.491497 -0.072966  
C 4.003723 -3.449662 -0.458476  
C 4.765120 -3.256059 -1.613662  
C 4.590439 -2.097418 -2.379302  
C 3.652735 -1.137382 -1.995121  
H 3.545686 -0.230565 -2.595400  
H 5.191333 -1.938328 -3.277983  
H 5.498827 -4.006318 -1.918119  
H 4.140145 -4.350138 0.145143  
H 2.471228 -2.654095 0.831951  
C 2.672176 1.368964 0.237597  
C 2.935991 1.540137 1.607730  
C 3.709857 2.615495 2.053084  
C 4.224642 3.532657 1.132530  
C 3.967924 3.369794 -0.233250  
C 3.198017 2.293903 -0.681371  
H 3.011959 2.183963 -1.752156  
H 4.371389 4.084207 -0.955025  
H 4.827331 4.375780 1.478773  
H 3.909387 2.737183 3.120529  
H 2.540797 0.826209 2.337132  
C 0.734865 0.503837 -1.788856  
C -0.661978 -0.124275 -1.909632  
P -1.645674 0.147781 -0.354898  
C -3.271596 -0.637942 -0.595162  
C -3.617552 -1.336148 -1.763110  
C -4.874705 -1.940629 -1.868953  
C -5.790358 -1.849817 -0.817730  
C -5.449255 -1.154703 0.348583  
C -4.194394 -0.556567 0.464113  
H -3.928490 -0.023115 1.379973  
H -6.162169 -1.083386 1.173545  
H -6.771789 -2.322056 -0.905458  
H -5.137843 -2.482588 -2.780512  
H -2.919565 -1.415785 -2.598249  
C -1.935219 1.956116 -0.297701  
C -3.054283 2.548335 -0.907360  
C -3.213676 3.935947 -0.876340  
C -2.261301 4.742191 -0.243421  
C -1.145560 4.159331 0.365201  
C -0.985273 2.771726 0.343157  
H -0.108933 2.331026 0.825983  
H -0.399455 4.783040 0.863242  
H -2.392598 5.826703 -0.220577  
H -4.088057 4.390026 -1.348852  
H -3.805878 1.927165 -1.399907  
H -0.597498 -1.214411 -2.060228  
H -1.200565 0.305808 -2.768901  
H 0.647170 1.597459 -1.702508  
H 1.319442 0.296004 -2.696754

#### 43A-15

Geometry with 65 atoms:

Total energy: -2888.453185480  
Cr 0.116474 -0.684011 1.438203  
C 1.618685 -0.801898 2.799397  
C 0.717727 -1.821843 3.489186  
H 0.990966 -2.028617 4.539774  
C 0.607410 -3.100978 2.630015  
C -0.028961 -2.721955 1.282719  
H 0.431192 -3.178011 0.393390  
H -1.116061 -2.912317 1.269015  
H 0.018917 -3.871731 3.156716  
H 1.620997 -3.512903 2.489502  
H -0.320238 -1.393156 3.585292  
H 2.602106 -1.205621 2.520579  
H 1.743364 0.147614 3.349191  
P 1.497660 0.020554 -0.452280  
C 2.857734 -1.050676 -1.034652  
C 3.203569 -2.212698 -0.327597  
C 4.254975 -3.018388 -0.776392  
C 4.965799 -2.668305 -1.927032  
C 4.630037 -1.505806 -2.631653

C 3.581969 -0.698213 -2.188727  
H 3.336308 0.215342 -2.736652  
H 5.189265 -1.226195 -3.527744  
H 5.786377 -3.299726 -2.276365  
H 4.517532 -3.922710 -0.222328  
H 2.657202 -2.487510 0.574130  
C 2.241673 1.639844 -0.021029  
C 3.608830 1.762053 0.276433  
C 4.123214 2.988435 0.707147  
C 3.282131 4.095666 0.853271  
C 1.917662 3.975770 0.568767  
C 1.396299 2.754446 0.137349  
H 0.326325 2.680372 -0.072947  
H 1.252727 4.835545 0.681637  
H 3.689732 5.052175 1.189145  
H 5.189511 3.077215 0.928971  
H 4.275780 0.904115 0.169018  
C 0.411231 0.348031 -1.942700  
C -0.908707 -0.428920 -1.877273  
P -1.795966 -0.148629 -0.261511  
C -3.341114 -1.117914 -0.426983  
C -3.247696 -2.500889 -0.672969  
C -4.404132 -3.278599 -0.760787  
C -5.661983 -2.689691 -0.592066  
C -5.759337 -1.318643 -0.338304  
C -4.606208 -0.532291 -0.255668  
H -4.697071 0.538763 -0.062220  
H -6.739440 -0.853627 -0.206366  
H -6.565680 -3.300419 -0.657334  
H -4.321719 -4.350095 -0.958973  
H -2.272215 -2.977669 -0.798411  
C -2.279785 1.619174 -0.277680  
C -2.610089 2.309829 -1.457121  
C -2.928267 3.669251 -1.410543  
C -2.929886 4.351506 -0.188570  
C -2.617009 3.670745 0.991669  
C -2.290243 2.312572 0.946066  
H -2.042736 1.790725 1.875886  
H -2.623205 4.197516 1.948794  
H -3.178581 5.415065 -0.157086  
H -3.179217 4.198797 -2.332848  
H -2.624286 1.792482 -2.419023  
H -0.731010 -1.515117 -1.937318  
H -1.562201 -0.169447 -2.724111  
H 0.223091 1.431383 -1.981925  
H 0.968316 0.087425 -2.855046

#### 43A-16

Geometry with 65 atoms:

Total energy: -2888.452146780  
Cr 0.002205 -0.252947 1.541155  
C -1.144177 -0.131077 3.218219  
C 0.074320 -0.862240 3.764116  
H 1.017087 -0.335170 3.396889  
C 0.124330 -2.319012 3.238475  
C 0.030546 -2.292752 1.704140  
H 0.914196 -2.703167 1.190079  
H -0.884827 -2.737047 1.290091  
H -0.725063 -2.867418 3.678816  
H 1.048631 -2.808690 3.584378  
H 0.215308 -0.792711 4.856386  
H -1.296417 0.877305 3.636412  
H -2.072345 -0.718279 3.271489  
P 1.760448 0.031443 -0.304237  
C 3.338734 -0.874119 -0.477069  
C 4.436940 -0.460159 0.300158  
C 5.639563 -1.166604 0.254055  
C 5.760083 -2.297509 -0.561205  
C 4.672212 -2.717695 -1.330541  
C 3.464556 -2.013469 -1.290277  
H 2.630638 -2.363039 -1.902015  
H 4.760833 -3.598612 -1.970936  
H 6.702348 -2.849474 -0.596684  
H 6.487424 -0.831234 0.856372  
H 4.358320 0.425635 0.936049  
C 2.191191 1.811883 -0.368508  
C 1.610228 2.664013 0.586024  
C 1.865243 4.038019 0.564200  
C 2.711853 4.567465 -0.413689  
C 3.300695 3.725183 -1.365535  
C 3.043058 2.353105 -1.346336

H 3.514783 1.699767 -2.084961  
H 3.967088 4.141855 -2.124681  
H 2.918470 5.640294 -0.432809  
H 1.408465 4.691657 1.311007  
H 0.952101 2.249564 1.360602  
C 0.816686 -0.255294 -1.883672  
C -0.529120 0.482140 -1.847639  
P -1.560977 0.020352 -0.366740  
C -2.424945 -1.533002 -0.799787  
C -2.215750 -2.219671 -2.005390  
C -2.897931 -3.414828 -2.258947  
C -3.791058 -3.928536 -1.316040  
C -4.002832 -3.247092 -0.111287  
C -3.320134 -2.059144 0.149946  
H -3.483839 -1.534351 1.095250  
H -4.701555 -3.645294 0.628319  
H -4.323767 -4.860844 -1.518425  
H -2.730736 -3.942205 -3.201267  
H -1.527955 -1.834635 -2.760270  
C -2.864244 1.300438 -0.299541  
C -3.834045 1.381970 -1.314697  
C -4.802733 2.385946 -1.274666  
C -4.813281 3.310925 -0.223657  
C -3.856447 3.228477 0.791532  
C -2.884284 2.224087 0.756989  
H -2.153622 2.150744 1.565668  
H -3.870357 3.942290 1.618725  
H -5.575712 4.093270 -0.193510  
H -5.556404 2.444415 -2.063758  
H -3.840899 0.653300 -2.129478  
H -1.102393 0.315703 -2.772882  
H -0.374929 1.569802 -1.763237  
H 1.421531 0.073483 -2.743885  
H 0.663080 -1.341785 -1.977024

#### 43A-17

Geometry with 65 atoms:

Total energy: -2888.452151040  
Cr -0.015072 -0.156423 1.534718  
C 1.118401 -0.045018 3.225741  
C -0.191303 -0.555640 3.809009  
H -0.331402 -0.368708 4.887720  
C -0.429820 -2.032580 3.411422  
C -0.237829 -2.162326 1.891068  
H 0.682526 -2.687010 1.600212  
H -1.099547 -2.589062 1.354872  
H -1.437409 -2.347919 3.726804  
H 0.296236 -2.657621 3.957958  
H -1.052077 0.052126 3.376734  
H 1.955138 -0.748135 3.346627  
H 1.398848 0.967377 3.558678  
P 1.570657 -0.098334 -0.373899  
C 2.354911 -1.692590 -0.827415  
C 3.743681 -1.809843 -0.999457  
C 4.301249 -3.036260 -1.373895  
C 3.483091 -4.150215 -1.580582  
C 2.099658 -4.040594 -1.403239  
C 1.536985 -2.821591 -1.020846  
H 0.458257 -2.757253 -0.865215  
H 1.455432 -4.909909 -1.555566  
H 3.923195 -5.105949 -1.875210  
H 5.382722 -3.117663 -1.507382  
H 4.394292 -0.946704 -0.846772  
C 2.925290 1.127992 -0.269124  
C 3.384424 1.836049 -1.394630  
C 4.439040 2.743776 -1.269421  
C 5.050154 2.947074 -0.027848  
C 4.604443 2.239866 1.092808  
C 3.544888 1.336840 0.975745  
H 3.197940 0.790093 1.854107  
H 5.080198 2.392848 2.064466  
H 5.875638 3.657099 0.064923  
H 4.787531 3.291196 -2.148576  
H 2.934348 1.682749 -2.377316  
C 0.592805 0.396736 -1.891769  
C -0.819186 -0.200535 -1.934528  
P -1.734154 0.119207 -0.343763  
C -3.319481 -0.768549 -0.477862  
C -3.946331 -1.174025 0.713794  
C -5.175176 -1.836332 0.674546  
C -5.783433 -2.107754 -0.555204

C -5.161791 -1.715814 -1.745323  
C -3.934929 -1.047618 -1.710711  
H -3.465172 -0.743390 -2.648463  
H -5.635500 -1.929302 -2.706598  
H -6.742695 -2.630055 -0.586713  
H -5.656080 -2.146268 1.605376  
H -3.470787 -0.972294 1.677555  
C -2.102361 1.916337 -0.403735  
C -3.285451 2.458789 -0.928140  
C -3.478645 3.843297 -0.924889  
C -2.497721 4.693962 -0.403165  
C -1.317306 4.161303 0.125561  
C -1.125130 2.778056 0.130382  
H -0.203761 2.363027 0.560620  
H -0.551546 4.820838 0.540820  
H -2.657334 5.774873 -0.401699  
H -4.403647 4.260987 -1.329877  
H -4.060174 1.801459 -1.330131  
H -0.794404 -1.292612 -2.074815  
H -1.375836 0.227092 -2.782983  
H 0.534133 1.496514 -1.863937  
H 1.156350 0.115883 -2.794267

<sup>43</sup>A-18

Geometry with 65 atoms:

Total energy: -2888.446081420  
Cr 0.001227 -0.085952 1.523812  
C 1.617925 -0.448327 2.687705  
C 0.608788 -0.743032 3.805834  
H 0.264093 -1.791710 3.755674  
C -0.670546 0.204892 3.864211  
C -1.647581 0.101605 2.685734  
H -2.275728 -0.803477 2.725031  
H -2.277323 0.990113 2.538593  
H -0.322938 1.246182 3.991580  
H -1.189736 -0.058345 4.801094  
H 1.099705 -0.632119 4.787350  
H 2.263646 -1.297045 2.422990  
H 2.232599 0.445915 2.885293  
P -1.550337 -0.067655 -0.431295  
C -3.075843 0.935702 -0.394926  
C -3.043442 2.286221 -0.786223  
C -4.184947 3.082156 -0.661590  
C -5.364832 2.543696 -0.139195  
C -5.399617 1.204495 0.261890  
C -4.262213 0.402856 0.139627  
H -4.303120 -0.641194 0.457709  
H -6.318098 0.778632 0.672985  
H -6.256552 3.167872 -0.043882  
H -4.150813 4.128055 -0.976184  
H -2.129762 2.730271 -1.188620  
C -2.047173 -1.807427 -0.722715  
C -1.445022 -2.819665 0.042422  
C -1.751070 -4.163338 -0.191853  
C -2.668189 -4.502462 -1.190441  
C -3.276006 -3.499278 -1.955342  
C -2.966797 -2.157036 -1.727109  
H -3.450592 -1.379951 -2.324603  
H -3.995571 -3.765028 -2.733453  
H -2.913978 -5.551587 -1.372170  
H -1.278179 -4.943210 0.409707  
H -0.731924 -2.558821 0.832766  
C -0.666777 0.384582 -2.010220  
C 0.712549 -0.277952 -2.017272  
P 1.579307 0.103561 -0.408852  
C 2.020552 1.870402 -0.599340  
C 1.387885 2.815253 0.224292  
C 1.640353 4.180425 0.059886  
C 2.532984 4.606960 -0.927525  
C 3.171554 3.670333 -1.749898  
C 2.916756 2.307050 -1.590851  
H 3.423012 1.580737 -2.232135  
H 3.871969 4.005127 -2.518832  
H 2.735781 5.672989 -1.056380  
H 1.144210 4.908868 0.705537  
H 0.691060 2.481314 1.001656  
C 3.133532 -0.855502 -0.432792  
C 3.123787 -2.196558 -0.857267  
C 4.287152 -2.966329 -0.783486  
C 5.467265 -2.411687 -0.278293  
C 5.479659 -1.082969 0.156615

C 4.319902 -0.307179 0.084779  
H 4.343651 0.728722 0.429637  
H 6.397876 -0.644553 0.554928  
H 6.376201 -3.015485 -0.222380  
H 4.270064 -4.004782 -1.123104  
H 5.210447 -2.654037 -1.245518  
H 1.326729 0.067619 -2.863142  
H 0.614943 -1.371996 -2.099780  
H -1.271658 0.077103 -2.877116  
H -0.567544 1.480763 -2.044443

<sup>43</sup>A-19

Geometry with 65 atoms:

Total energy: -2888.446653850  
Cr -0.005409 0.086099 1.515797  
C -1.635311 -0.003296 2.715388  
C -0.680290 -0.398157 3.851019  
H -1.124738 -0.123949 4.822913  
C 0.754563 0.287000 3.829772  
C 1.663309 -0.074843 2.647103  
H 2.514305 0.607113 2.513067  
H 2.019090 -1.118769 2.676578  
H 1.241080 -0.014187 4.773208  
H 0.625170 1.383549 3.898567  
H -0.538714 -1.493542 3.876626  
H -2.067953 1.003527 2.848508  
H -2.440540 -0.727754 2.532461  
P 1.541945 0.110425 -0.439951  
C 2.993648 -0.997695 -0.433478  
C 2.795697 -2.372459 -0.659647  
C 3.867033 -3.262579 -0.562676  
C 5.142250 -2.793873 -0.228676  
C 5.341740 -1.431138 0.009142  
C 4.274051 -0.534036 -0.088847  
H 4.444372 0.527686 0.100607  
H 6.334980 -1.059830 0.273115  
H 5.979190 -3.492153 -0.151926  
H 3.704240 -4.327424 -0.746518  
H 1.803490 -2.759491 -0.908060  
C 2.138889 1.828447 -0.653606  
C 3.001609 2.188581 -1.703955  
C 3.383166 3.521366 -1.869290  
C 2.904295 4.505079 -0.995301  
C 2.045094 4.155643 0.050265  
C 1.667136 2.820866 0.220952  
H 1.000590 2.544798 1.046122  
H 1.672346 4.920098 0.736066  
H 3.205107 5.546939 -1.129707  
H 4.057592 3.795113 -2.684225  
H 3.384492 1.427166 -2.388375  
C 0.646420 -0.228163 -2.041324  
C -0.723030 0.454277 -2.005405  
P -1.582353 0.010537 -0.409970  
C -2.017623 -1.752634 -0.658302  
C -2.765458 -2.179543 -1.770148  
C -3.024587 -3.538340 -1.959627  
C -2.537546 -4.482452 -1.047421  
C -1.793882 -4.066788 0.060493  
C -1.538543 -2.706157 0.255103  
H -0.966656 -2.381310 1.130866  
H -1.415908 -4.799843 0.777044  
H -2.741942 -5.544934 -1.200761  
H -3.609578 -3.863349 -2.823432  
H -3.154471 -1.451313 -2.486230  
C -3.135643 0.971867 -0.399547  
C -4.372609 0.372176 -0.110257  
C -5.530110 1.152904 -0.039265  
C -5.464184 2.532985 -0.249655  
C 4.232750 3.137244 -0.525382  
C -3.072137 2.364314 -0.593986  
H -2.116898 2.855685 -0.800309  
H -4.175076 4.216388 -0.687366  
H -6.371578 3.139416 -0.196946  
H -6.488718 0.676597 0.180433  
H -4.439353 -0.704987 0.055367  
H -1.345268 0.163682 -2.865602  
H -0.614542 1.550022 -2.033500  
H 1.253687 0.120339 -2.890690  
H 0.536961 -1.319670 -2.138854

<sup>43</sup>B-01

Geometry with 73 atoms:

Total energy: -3117.380784190  
Cr -0.025075 -0.109129 1.240678  
C 1.407743 -0.296165 2.742684  
C 0.675854 -0.178720 4.086784  
C -0.686736 -0.870539 3.971452  
C -1.427875 -0.292120 2.761115  
H -1.734924 0.753231 2.959508  
H -2.344922 -0.853248 2.507635  
H -1.267286 -0.778409 4.910263  
H -0.522286 -1.955420 3.824469  
H 1.267013 -0.588308 4.928871  
H 0.507945 0.888454 4.329207  
H 1.781733 -1.328418 2.598280  
H 2.286818 0.369933 2.676338  
P 1.585766 0.016154 -0.709699  
C 3.190853 0.879960 -0.784950  
C 3.508445 1.823380 -1.776283  
C 4.736713 2.492673 -1.739357  
C 5.654700 2.226535 -0.720616  
C 5.344100 1.285739 0.268634  
C 4.118830 0.619498 0.241966  
H 3.883921 -0.113493 1.017304  
H 6.059157 1.071446 1.066595  
H 6.613517 2.750020 -0.697146  
H 4.976345 3.221849 -2.517178  
H 2.813380 2.043658 -2.588335  
C 1.992480 -1.771763 -0.797949  
C 3.073104 -2.257591 -1.550745  
C 3.395087 -3.615055 -1.556239  
C 2.636170 -4.502354 -0.789943  
C 1.556710 -4.046116 -0.028240  
C 1.233374 -2.685289 -0.035402  
O 0.158231 -2.193632 0.697959  
C -0.869108 -3.120946 1.107089  
H -1.721848 -2.518037 1.429140  
H -0.517654 -3.740940 1.943659  
H -1.162248 -3.751128 0.254596  
H 0.989709 -4.755309 0.573408  
H 2.884962 -5.566011 -0.773078  
H 4.239200 -3.976289 -2.147224  
H 3.677056 -1.553950 -2.129221  
C 0.697290 0.412231 -2.299272  
C -0.703743 -0.210302 -2.319419  
P -1.594625 0.097112 -0.713688  
C -3.239369 -0.674566 -0.869705  
C -3.567863 -1.577951 -1.894260  
C 4.820690 -2.201246 -1.903619  
C -5.751154 -1.929706 -0.897540  
C -5.428668 -1.030145 0.125740  
C -4.179466 -0.409680 0.144925  
H -3.932015 0.287307 0.949619  
H -6.152744 -0.813409 0.914820  
H -6.728830 -2.417382 -0.909761  
H -5.069408 -2.899151 -2.706860  
H -2.860577 -1.803547 -2.694507  
C -1.890691 1.901434 -0.645595  
C -2.815885 2.533649 -1.491302  
C -3.056594 3.904022 -1.400536  
C -2.370525 4.653361 -0.442162  
C -1.445508 4.050241 0.414250  
C -1.198871 2.675470 0.311533  
O -0.273118 2.039945 1.131355  
C 0.563683 2.858347 1.975410  
H 1.306785 2.190609 2.416215  
H 1.073550 3.621999 1.369845  
H -0.036404 3.326417 2.769190  
H -0.936514 4.661370 1.157134  
H -2.555952 5.725980 -0.348272  
H -3.779764 4.381505 -2.064727  
H -3.362911 1.932306 -2.222315  
H -0.633821 -1.305290 -2.426952  
H -1.289825 0.171481 -3.170171  
H 1.286898 0.080875 -3.168346  
H 0.621378 1.511193 -2.342697

<sup>43</sup>B-02

Geometry with 73 atoms:

Total energy: -3117.380998960  
Cr -0.056634 -0.385245 1.249895  
C 1.483670 -0.758569 2.602022

C 0.859937 -1.149453 3.952557  
C -0.484863 -1.846183 3.712828  
C -1.326995 -0.966412 2.781431  
H -1.617008 -0.028844 3.294382  
H -2.264161 -1.453384 2.457151  
H -0.998163 -2.069766 4.668808  
H -0.299359 -2.828638 3.238493  
H 1.536499 -1.777082 4.563335  
H 0.675455 -0.243519 4.560403  
H 2.018103 -1.621763 2.161383  
H 2.215827 0.063347 2.693046  
P 1.511321 0.075850 -0.711109  
C 3.068897 1.026767 -0.707425  
C 4.018974 0.714856 0.284725  
C 5.208832 1.437827 0.371656  
C 5.461876 2.486465 -0.520528  
C 4.521666 2.804099 -1.503611  
C 3.329326 2.078630 -1.601771  
H 2.616118 2.343250 -2.384307  
H 4.715535 3.618989 -2.205446  
H 6.392874 3.054029 -0.449172  
H 5.940950 1.183145 1.141774  
H 3.829287 -0.100224 0.986810  
C 2.009152 -1.667366 -1.006045  
C 3.136661 -2.015420 -1.765424  
C 3.500442 -3.351690 -1.938590  
C 2.736780 -4.356030 -1.339198  
C 1.612480 -4.036131 -0.572435  
C 1.252340 -2.695598 -0.409348  
O 0.136588 -2.330948 0.339856  
C -0.941934 -3.283952 0.451568  
H -1.821027 -2.727195 0.788259  
H -0.696564 -4.062821 1.187095  
H -1.141218 -3.732997 -0.532478  
H 1.037594 -4.832725 -0.101232  
H 3.017575 -5.405058 -1.458433  
H 4.380260 -3.607098 -2.532849  
H 3.740535 -1.223934 -2.216033  
C 0.584224 0.578486 -2.244902  
C -0.818169 -0.042150 -2.275129  
P -1.666010 0.159979 -0.627978  
C -3.392799 -0.380697 -0.857281  
C -4.273737 -0.203208 0.226786  
C -5.593877 -0.645365 0.139819  
C -6.046099 -1.283007 -1.021697  
C -5.173475 -1.473325 -2.095996  
C -3.850663 -1.024085 -2.019243  
H -3.189801 -1.180301 -2.873882  
H -5.522242 -1.971095 -3.004193  
H -7.079042 -1.633177 -1.087025  
H -6.272041 -0.496680 0.983577  
H -3.925045 0.284878 1.141152  
C -1.712157 1.977216 -0.403059  
C -2.381111 2.814777 -1.309192  
C -2.346224 4.201593 -1.170324  
C -1.626281 4.761092 -0.111702  
C -0.959294 3.950808 0.810566  
C -1.009760 2.557572 0.674546  
O -0.379555 1.716606 1.584763  
C 0.132973 2.297088 2.802549  
H -0.647522 2.898478 3.290345  
H 0.408178 1.465488 3.453737  
H 1.021412 2.908948 2.587718  
H -0.408736 4.418626 1.624418  
H -1.580665 5.845962 0.008799  
H -2.873459 4.840795 -1.881403  
H -2.941025 2.363607 -2.132955  
H -0.765844 -1.125154 -2.475913  
H -1.420281 0.414704 -3.076253  
H 1.154786 0.312511 -3.148299  
H 0.500737 1.676076 -2.207860

**\*3B-03**  
Geometry with 73 atoms:  
Total energy: -3117.378237030  
Cr -0.016626 -0.578175 1.201677  
C 1.640246 -0.959746 2.390573  
C 1.174467 -2.045134 3.369686  
C -0.196161 -1.652495 3.937056  
C -1.152109 -1.315349 2.778141  
H -1.941308 -0.596129 3.065284

H -1.671425 -2.223201 2.423224  
H -0.061473 -0.768450 4.588281  
H -0.596953 -2.442278 4.600527  
H 1.079060 -3.008400 2.831855  
H 1.908232 -2.229246 4.179313  
H 2.519290 -1.280916 1.804814  
H 1.925385 -0.032504 2.921000  
P 1.416456 0.105380 -0.792738  
C 2.821395 1.266869 -0.713511  
C 3.968578 0.905526 0.019244  
C 5.004756 1.822315 0.203210  
C 4.908768 3.112097 -0.330526  
C 3.768212 3.481508 -1.048144  
C 2.727110 2.567923 -1.238086  
H 1.843405 2.887712 -1.793128  
H 3.684263 4.487661 -1.466216  
H 5.721612 3.827834 -0.185771  
H 5.892050 1.526485 0.768242  
H 4.056079 -0.095842 0.445963  
C 2.112743 -1.557425 -1.129700  
C 3.274003 -1.775959 -1.885421  
C 3.783259 -3.064507 -2.059902  
C 3.133462 -4.149740 -1.467570  
C 1.971016 -3.959555 -0.713956  
C 1.462457 -2.668843 -0.557056  
O 0.292792 -2.433343 0.162659  
C -0.706501 -3.473863 0.194245  
H -1.667454 -2.986110 0.390660  
H -0.488180 -4.195455 0.994304  
H -0.744410 -3.980121 -0.781089  
H 1.479964 -4.813488 -0.247696  
H 3.532647 -5.159901 -1.584310  
H 4.688995 -3.218933 -2.649981  
H 3.790688 -0.9523261 -2.332084  
C 0.424074 0.517888 -2.317459  
C -0.957688 -0.147599 -2.262809  
P -1.734272 0.053380 -0.574169  
C -3.502159 -0.352203 -0.777805  
C -3.955561 -1.214541 -1.791130  
C -5.306483 -1.570636 -1.856274  
C -6.212137 -1.073755 -0.915168  
C -5.764352 -0.219532 0.099186  
C -4.417114 0.136328 0.172955  
H -4.075559 0.801767 0.970436  
H -6.468602 0.170896 0.837861  
H -7.267294 -1.351967 -0.970708  
H -5.651455 -2.237034 -2.650725  
C -6.212137 -1.615049 -2.536912  
C -1.655021 1.866468 -0.308176  
C -2.215230 2.773131 -1.222180  
C -2.056692 4.149152 -1.062043  
C -1.320539 4.629936 0.024591  
C -0.761559 3.751297 0.955451  
O -0.938257 2.371080 0.796784  
O -0.416202 1.465636 1.712210  
C -0.086239 1.947432 3.032426  
H -0.905095 2.573802 3.414153  
H 0.026106 1.066257 3.668209  
H 0.858508 2.509669 3.010579  
H -0.190026 4.152286 1.790928  
H -1.176743 5.704729 0.158135  
H -2.500848 4.841932 -1.779714  
H -2.787685 2.387125 -2.069727  
H -0.876600 -1.231599 -2.445817  
H -1.619184 0.268257 -3.038693  
H 0.975435 0.221231 -3.222948  
H 0.302745 1.610270 -2.343624

**\*3B-04**  
Geometry with 73 atoms:  
Total energy: -3117.377709620  
Cr 0.018855 0.084062 1.238109  
C -1.408899 0.347616 2.734014  
C -0.629855 0.864990 3.950950  
C 0.656813 0.043733 4.083537  
C 1.433993 0.137838 2.761986  
H 2.167338 -0.680841 2.644871  
H 1.994130 1.088748 2.712324  
H 0.383007 -1.010136 4.282962  
H 1.260355 0.367924 4.953708  
H -0.359540 1.927629 3.796791

H -1.229528 0.838704 4.881901  
H -2.199415 1.049637 2.411703  
H -1.902147 -0.609780 2.982067  
P -1.599065 -0.004751 -0.712429  
C -3.195445 -0.886000 -0.812507  
C -3.996427 -0.904388 0.345347  
C -5.220746 -1.574028 0.344022  
C -5.655217 -2.241941 -0.806684  
C -4.862422 -2.233154 -1.957254  
C -3.637686 -1.557230 -1.965289  
H -3.041149 -1.559346 -2.879151  
H -5.198082 -2.751953 -2.858589  
H -6.611872 -2.769954 -0.805327  
H -5.836432 -1.577728 1.246784  
H -3.661846 -0.389561 1.248411  
C -2.017898 1.782808 -0.746681  
C -3.128647 2.286419 -1.441103  
C -3.468284 3.638348 -1.372396  
C -2.700322 4.500787 -0.586666  
H -1.592146 4.024988 0.119995  
C -1.249546 2.672821 0.034419  
O -0.141583 2.168683 0.710439  
C 0.934112 3.077428 1.028770  
H 1.830786 2.467201 1.173780  
H 0.707781 3.633452 1.949850  
H 1.098396 3.767658 1.089089  
H -1.014196 4.707230 0.742445  
H -2.965648 5.557792 -0.509906  
H -4.335438 4.013877 -1.919559  
H -3.741886 1.601452 -2.032425  
C -0.705985 -0.388033 -2.302034  
C 0.714071 0.188625 -2.319256  
P 1.608561 -0.102520 -0.712726  
C 3.228333 0.722938 -0.882981  
C 3.622708 1.421512 -2.036675  
C 4.857526 2.078611 -2.071194  
C 5.707139 2.041640 -0.962796  
C 5.320711 1.344954 0.188316  
C 4.087415 0.694167 0.232615  
H 3.789413 0.160708 1.137888  
H 5.981500 1.312246 1.058008  
H 6.671039 2.555282 -0.994379  
H 5.156049 2.618494 -2.973228  
H 2.980776 1.460000 -2.918507  
C 1.960574 -1.895586 -0.611624  
C 2.980087 -2.504209 -1.360317  
C 3.265247 -3.862159 -1.218445  
C 2.531751 -4.622469 -2.304772  
C 1.515124 -4.041230 0.457986  
C 1.225386 -2.680943 0.303400  
O 0.210229 -2.070671 1.033215  
C -0.787066 -2.916629 1.642148  
H -0.378828 -3.412363 2.535054  
H -1.615633 -2.265423 1.931079  
H -1.144054 -3.659238 0.913932  
H 0.969321 -4.654178 1.173383  
H 2.752328 -5.684196 -0.171524  
H 4.060960 -4.321480 -1.808418  
H 3.565509 -1.895339 -2.054149  
H 0.679761 1.284141 -2.441527  
H 1.285229 -0.221754 -3.166645  
H -1.276248 -0.025866 -3.171693  
H -0.672271 -1.488911 -2.360517

**\*3B-05**  
Geometry with 73 atoms:  
Total energy: -3117.377761620  
Cr -0.020710 -1.134695 0.716099  
C -0.278451 -2.832372 -0.448744  
C -1.378510 -3.672941 0.213233  
C -1.213858 -3.601269 1.735870  
C -1.151086 -2.124965 2.144719  
H -0.773395 -1.972198 3.175678  
H -2.158197 -1.666978 2.110790  
H -0.270177 -4.108666 2.05046  
H -2.018578 -4.160474 2.251743  
H -2.369065 -3.260957 -0.050895  
H -1.377885 -4.720815 -0.146223  
H -0.468749 -2.666856 -1.524734  
H 0.700120 -3.346597 -0.376682  
P -1.662851 0.048635 -0.577532

C -3.422905 -0.414716 -0.726111  
C -3.796507 -1.436946 -1.617953  
C -5.119491 -1.880693 -1.664479  
C -6.079789 -1.320168 -0.815972  
C -5.711513 -0.314599 0.082211  
C -4.389708 0.136200 0.132187  
H -4.116535 0.919907 0.841449  
H -6.456047 0.123783 0.751176  
H -7.114040 -1.670519 -0.852734  
H -5.399130 -2.672974 -2.362875  
H -3.057620 -1.902690 -2.274458  
C -1.611698 1.718049 0.176821  
C -2.306122 2.806066 -0.375762  
C -2.206101 4.081981 0.177612  
C -1.399389 4.276366 1.302105  
C -0.703852 3.211553 1.878678  
C -0.809951 1.931686 1.320484  
O -0.138186 0.845480 1.839685  
C 0.695269 1.019218 2.990952  
H 0.103313 1.363442 3.852765  
H 1.512455 1.725932 2.778084  
H 1.118178 0.034094 3.219714  
H -0.078336 3.394948 2.750654  
H -1.304959 5.271314 1.743432  
H -2.752206 4.917861 -0.264205  
H -2.938801 2.645090 -1.252782  
C -1.046831 0.307449 -2.339696  
C 0.457026 -0.005153 -2.538017  
P 1.375136 0.114726 -0.934869  
C 1.973983 1.825040 -0.736479  
C 3.034998 2.085561 0.150338  
C 3.417154 3.400845 0.422948  
C 2.743723 4.469414 -0.179402  
C 1.689061 4.216460 -1.061105  
C 1.303135 2.902731 -1.339411  
H 0.470983 2.730096 -2.023604  
H 1.159255 5.045285 -1.536344  
H 3.044514 5.497765 0.034635  
H 4.249603 3.592225 1.104775  
H 3.572984 1.258489 0.621120  
C 2.836228 -0.970101 -0.937579  
C 3.774846 -1.002200 -1.978475  
C 4.857950 -1.881227 -1.940369  
C 5.006515 -2.732041 -0.843604  
C 4.090351 -2.713120 0.213321  
C 3.005298 -1.831697 0.172048  
O 2.069414 -1.762902 1.202359  
C 2.283026 -2.572094 2.373662  
H 1.471520 -2.334483 3.069252  
H 2.239457 -3.642004 2.122118  
H 3.251145 -2.324681 2.834680  
H 4.235361 -3.393663 1.050182  
H 5.847125 -3.428628 -0.800738  
H 5.579498 -1.901865 -2.759596  
H 3.650995 -0.327055 -2.828962  
H 0.898168 0.634640 -3.317010  
H 0.588138 -1.051645 -2.850038  
H -1.279910 1.349901 -2.602046  
H -1.653078 -0.323272 -3.004280

**\*3B-06**  
Geometry with 73 atoms:  
Total energy: -3117.377062410  
Cr -0.051194 -1.099409 0.716101  
C -0.214581 -2.796983 -0.474264  
C -0.748838 -3.888919 0.464746  
C -1.876958 -3.302108 1.323404  
C -1.357969 -2.037351 2.018385  
H -0.745027 -2.301075 2.906858  
H -2.167702 -1.375901 2.375737  
H -2.273991 -4.055102 2.031846  
H -2.720118 -3.033853 0.660982  
H -1.084760 -4.787958 -0.088535  
H 0.064147 -4.237944 1.130986  
H -0.930743 -2.631368 -1.300004  
H 0.749653 -3.074199 -0.936790  
P -1.655185 0.078674 -0.593230  
C -3.406418 -0.413269 -0.729013  
C -4.365949 0.112757 0.152819  
C -5.677800 -0.367327 0.129910  
C -6.043105 -1.377195 -0.764986

C -5.089861 -1.911910 -1.637622  
C -3.776129 -1.439014 -1.618036  
H -3.041398 -1.884559 -2.293003  
H -5.367637 -2.706551 -2.334066  
H -7.069840 -1.750498 -0.780427  
H -6.417024 0.050854 0.817443  
H -4.093218 0.898239 0.860393  
C -1.613966 1.753263 0.145658  
C -2.306608 2.836019 -0.418997  
C -2.206684 4.116957 0.122939  
C -1.401384 4.321308 1.246768  
C -0.708170 3.261415 1.835302  
C -0.815664 1.976156 1.289980  
O -0.150474 0.892780 1.823778  
C 0.684489 1.077839 2.971735  
H 1.095358 0.092043 3.219825  
H 0.096930 1.444599 3.827246  
H 1.510472 1.770471 2.746549  
H -0.084426 3.452278 2.707019  
H -1.306722 5.320432 1.678554  
H -2.751300 4.949233 -0.327422  
H -2.936218 2.666330 -1.296582  
C -1.017828 0.311022 -2.350451  
C 0.476914 -0.057780 -2.525136  
P 1.390733 0.093423 -0.919757  
C 2.014641 1.797641 -0.751804  
C 3.079067 2.055033 0.132113  
C 3.478834 3.368161 0.389202  
C 2.820001 4.438442 -0.226121  
C 1.762588 4.188932 -1.105532  
C 1.358604 2.877275 -1.367880  
H 0.525469 2.708757 -2.051953  
H 1.244480 5.019020 -1.591399  
H 3.134595 5.465147 -0.024380  
H 4.313587 3.556411 1.069106  
H 3.604503 1.226607 0.613650  
C 2.833790 -1.016042 -0.880461  
C 3.785875 -1.086089 -1.906994  
C 4.848454 -1.988540 -1.839445  
C 4.962277 -2.825581 -0.728139  
C 4.032026 -2.769384 0.315252  
C 2.968756 -1.864066 0.244816  
O 2.018287 -1.762794 1.258795  
C 2.228283 -2.511986 2.468637  
H 1.416154 -2.239295 3.151666  
H 2.179814 -3.593452 2.273482  
H 3.196118 -2.244494 2.918987  
H 4.146766 -3.442046 1.163487  
H 5.785646 -3.540831 -0.663200  
H 5.580657 -2.038202 -2.647923  
H 3.688829 -0.422891 -2.770351  
H 0.941847 0.534108 -3.327906  
H 0.573617 -1.121151 -2.790621  
H -1.209021 1.360045 -2.620352  
H -1.636682 -0.300254 -3.021834

**\*3B-07**  
Geometry with 73 atoms:  
Total energy: -3117.375064490  
Cr -0.120394 -0.997538 0.811000  
C -0.439092 -2.796019 -0.190650  
C -0.786687 -3.802076 0.913381  
C -1.831463 -3.161936 1.836855  
C -1.301296 -1.801677 2.303693  
H -0.599242 -1.924013 3.157026  
H -2.097249 -1.113429 2.639604  
H -2.097074 -3.835687 2.674400  
H -2.762248 -3.012134 1.259628  
H -1.142337 -4.767458 0.502514  
H 0.118540 -4.046810 1.502473  
H -1.297866 -2.708876 -0.881239  
H 0.434402 -3.100083 -0.794402  
P -1.693403 0.067191 -0.625913  
C -3.463387 -0.350845 -0.743605  
C -4.338057 0.132694 0.246484  
C -5.681024 -0.246453 0.242993  
C -6.164216 -1.114434 -0.742334  
C -5.298713 -1.602453 -1.725004  
C -3.952061 1.227072 -1.727986  
H -3.293793 -1.625849 -2.501995  
H -5.670959 -2.281061 -2.496260

H -7.215806 -1.411026 -0.742911  
H -6.353488 0.137199 1.014052  
H -3.970451 0.810303 1.021059  
C -1.608126 1.826049 -0.131523  
C -2.207067 2.850533 -0.880528  
C -2.126411 4.180860 -0.468277  
C -1.451251 4.488894 0.716940  
C -0.849556 3.488015 1.483417  
C -0.919343 2.155435 1.057991  
O -0.317319 1.126557 1.745457  
C 0.321566 1.395885 2.997677  
H 1.188761 2.061041 2.861058  
H 0.660696 0.428087 3.386782  
H -0.390360 1.835481 3.713354  
H -0.318439 3.759181 2.394379  
H -1.385888 5.525675 1.055456  
H -2.594225 4.970242 -1.059984  
H -2.753026 2.595125 -1.792781  
C -1.006353 -0.053898 -2.357610  
C 0.453630 0.430495 -2.468172  
P 1.383189 0.162020 -0.874730  
C 2.391209 1.662439 -0.577330  
C 3.711111 1.560312 -0.101946  
C 4.433339 2.171086 0.225646  
C 3.851226 3.974277 0.083846  
C 2.538624 4.082997 -0.386218  
C 1.808900 2.937059 -0.709441  
H 0.779686 3.046186 -1.056454  
H 2.073725 5.065424 -0.499210  
H 4.420049 4.872318 0.336864  
H 5.460533 2.617963 0.586927  
H 4.184081 0.581809 0.004751  
C 2.580388 -1.206743 -1.011262  
C 3.333719 -1.493066 -2.155926  
C 4.234785 -2.560768 -2.170467  
C 4.389141 -3.343014 -1.024595  
C 3.650398 -3.075830 -1.340702  
C 2.746976 -2.011645 0.139601  
O 1.970531 -1.701861 1.252210  
C 2.327970 -2.270221 2.522630  
H 1.710467 -1.764446 3.274199  
H 2.114358 -3.349232 2.547635  
H 3.391226 -2.083196 2.735603  
H 3.779047 -3.709657 1.010340  
H 5.089992 -4.181140 -1.023846  
H 4.813669 -2.778633 -3.070288  
H 3.215154 -0.868530 -3.044932  
H 0.489531 1.510907 -2.668055  
H 0.967048 -0.063553 -3.306912  
H -1.657358 0.485444 -3.063187  
H -1.067442 -1.124582 -2.605448

**\*3B-08**  
Geometry with 73 atoms:  
Total energy: -3117.376187890  
Cr 0.103632 -1.239869 0.650593  
C 0.143730 -2.861127 -0.647060  
C -0.070111 -4.092106 0.244999  
C -1.198663 -3.795214 1.240936  
C -0.861503 -2.498799 1.986639  
H -0.112403 -2.698721 2.781266  
H -1.730158 -2.041744 2.494062  
H -1.371698 -4.653828 1.918650  
H -2.137936 -3.660507 0.673807  
H -0.280586 -5.003937 -0.347315  
H 0.856905 -4.311628 0.809565  
H -0.681408 -2.780191 -1.378480  
H 1.086639 -2.915669 -1.220526  
P -1.685791 -0.142325 -0.557208  
C -3.435999 -0.642880 -0.721087  
C -4.007275 -1.376138 0.333040  
C -5.351109 -1.752547 0.279725  
C -6.134300 -1.404021 -0.825049  
C -5.571772 -0.674301 -1.876968  
C -4.228240 -0.292854 -1.828851  
H -3.811182 0.280053 -2.659441  
H -6.181017 -0.399599 -2.741547  
H -7.184367 -1.703270 -0.867960  
H -5.785245 -2.325878 1.102267  
H -3.398511 -1.655092 1.194483  
C -1.732365 1.498504 0.271804

C -2.513524 2.555946 -0.217532  
C -2.514194 3.802127 0.408363  
C -1.724956 3.995881 1.545081  
C -0.950847 2.956057 2.064586  
C -0.958828 1.706350 1.433950  
O -0.217575 0.640810 1.903327  
C 0.458468 0.758828 3.159011  
H -0.244229 1.049567 3.954772  
H 1.284650 1.484016 3.093662  
H 0.858748 -0.234554 3.390125  
H -0.341258 3.136125 2.948585  
H -1.708685 4.968257 2.042693  
H -3.127571 4.615171 0.014790  
H -3.139425 2.394793 -1.099201  
C -1.118321 0.220128 -2.312781  
C 0.413586 0.127135 -2.522962  
P 1.327940 0.274950 -0.921734  
C 1.736778 2.027484 -0.633584  
C 2.756899 2.352091 0.279750  
C 2.997650 3.684657 0.620366  
C 2.222344 4.705834 0.059616  
C 1.208390 4.388842 -0.848672  
C 0.963682 3.057411 -1.194607  
H 0.159551 2.831160 -1.896537  
H 0.599143 5.180885 -1.290236  
H 2.411878 5.748018 0.327562  
H 3.798893 3.927630 1.322786  
H 3.373177 1.562726 0.718329  
C 2.904391 -0.628290 -1.016691  
C 3.808262 -0.495260 -2.080075  
C 4.979169 -1.253348 -2.122847  
C 5.247999 -2.151801 -1.088534  
C 4.366299 -2.297146 -0.012281  
C 3.195735 -1.533383 0.029034  
O 2.287647 -1.629017 1.082022  
C 2.703604 -2.345221 2.258279  
H 1.922429 -2.201411 3.011634  
H 2.800021 -3.420846 2.050026  
H 3.655031 -1.938725 2.633275  
H 4.602622 -3.012282 0.773534  
H 6.157571 -2.756599 -1.110993  
H 5.674883 -1.145501 -2.957437  
H 3.586458 0.211424 -2.884101  
H 0.761437 0.858244 -3.267787  
H 0.678962 -0.875038 -2.890536  
H -1.499756 1.214352 -2.589777  
H -1.623426 -0.511295 -2.960481

#### <sup>43</sup>B-09

Geometry with 73 atoms:

Total energy: -3117.376301000

Cr 0.112612 -1.231798 0.661457  
C -0.003494 -2.866140 -0.601678  
C -0.976110 -3.858120 0.049399  
C -0.715502 -3.889344 1.561551  
C -0.753958 -2.452641 2.098739  
H -0.274810 -2.347857 3.092236  
H -1.794633 -2.107250 2.234517  
H 0.287888 -4.324040 1.734189  
H -1.426296 -4.564350 2.076529  
H -2.016353 -3.527348 -0.126989  
H -0.900010 -4.870347 -0.394166  
H -0.265680 -2.648936 -1.652527  
H 1.025306 -3.275345 -0.603997  
P -1.687464 -0.127465 -0.534299  
C -3.445750 -0.605589 -0.704822  
C -4.029715 -1.357080 0.329295  
C -5.377460 -1.717860 0.264294  
C -6.154312 -1.335674 -0.833403  
C -5.580306 -0.588659 -1.866668  
C -4.232926 -0.223388 -1.806346  
H -3.809233 0.362330 -2.624373  
H -6.183439 -0.287968 -2.726869  
H -7.207468 -1.622302 -0.885718  
H -5.819263 -2.305203 1.072720  
H -3.429196 -1.666374 1.185748  
C -1.715824 1.511549 0.303358  
C -2.521791 2.563455 -0.157691  
C -2.516126 3.808177 0.471013  
C -1.696695 4.006290 1.585172  
C -0.895664 2.973332 2.076415

C -0.906896 1.725741 1.441356  
O -0.135206 0.670670 1.884694  
C 0.707515 0.848361 3.028185  
H 1.456957 1.633086 2.842554  
H 1.216707 -0.108563 3.190727  
H 0.109873 1.090463 3.920316  
H -0.263374 3.156909 2.943382  
H -1.677658 4.976263 2.087383  
H -3.149207 4.615794 0.097971  
H -3.172487 2.399171 -1.020415  
C -1.130853 0.232930 -2.296411  
C 0.396489 0.134474 -2.534267  
P 1.331608 0.248399 -0.944529  
C 1.765877 1.994318 -0.650355  
C 2.815753 2.306209 0.233129  
C 3.074893 3.635111 0.575691  
C 2.287930 4.664709 0.047842  
C 1.244477 4.360401 -0.831027  
C 0.981832 3.033244 -1.179625  
H 0.155230 2.817410 -1.858358  
H 0.625972 5.159095 -1.246948  
H 2.491514 5.703702 0.317809  
H 3.899265 3.868352 1.254255  
H 3.441160 1.510486 0.646226  
C 2.892731 -0.679183 -1.050880  
C 3.794631 -0.558703 -2.117599  
C 4.956861 -1.329754 -2.161879  
C 5.220037 -2.227042 -1.124976  
C 4.341033 -2.359626 -0.044835  
C 3.178583 -1.583304 -0.002448  
O 2.273930 -1.663192 1.055060  
C 2.643121 -2.458008 2.196889  
H 1.846659 -2.331733 2.936608  
H 2.715464 -3.521292 1.926095  
H 3.597616 -2.101662 2.612710  
H 4.574104 -3.073122 0.743551  
H 6.123447 -2.840987 -1.148283  
H 5.650733 -1.232555 -2.999290  
H 3.577722 0.148429 -2.922539  
H 0.737518 0.881824 -3.265899  
H 0.652142 -0.858938 -2.930459  
H -1.511715 1.228977 -2.567710  
H -1.649393 -0.495910 -2.936067

#### <sup>43</sup>B-10

Geometry with 73 atoms:

Total energy: -3117.367948980

Cr -0.089972 -1.089857 0.825302  
C -1.205845 -2.064927 2.255162  
C -2.293003 -2.871677 1.527354  
C -1.777265 -3.408016 0.160304  
C -0.368182 -2.877524 -0.156047  
H -0.147221 -2.876404 -1.238827  
H 0.405176 -3.509083 0.320123  
H -2.477070 -3.099347 -0.635495  
H -1.790605 -4.513835 0.140049  
H -2.677647 -3.700491 2.151464  
H -3.162154 -2.215876 1.351660  
H -0.491588 -2.740451 2.767757  
H -1.632281 -1.394012 3.025025  
P 1.342914 0.049184 -0.917719  
C 2.292801 1.579737 -0.589573  
C 2.397495 2.668779 -1.466677  
C 3.097804 3.817708 -1.080928  
C 3.702550 3.887200 0.176249  
C 3.610384 2.799771 1.053159  
C 2.906806 1.656081 0.675662  
H 2.829609 0.812549 1.366561  
H 4.087191 2.845402 2.035588  
H 4.249427 4.785678 0.472224  
H 3.172578 4.659332 -1.773125  
H 1.941359 2.640258 -2.458360  
C 2.603394 -1.269954 -1.016938  
C 3.361530 -1.566137 -2.154859  
C 4.299891 -2.601569 -2.138193  
C 4.485056 -3.340160 -0.968742  
C 3.742948 -3.059695 0.184991  
C 2.804926 -2.026657 0.160064  
O 2.028012 -1.694464 1.271324  
C 2.337571 -2.301251 2.535601  
H 2.112553 -3.378397 2.522023

H 1.699824 -1.809646 3.279865  
H 3.395533 -2.134189 2.788138  
H 3.901093 -3.658985 1.080402  
H 5.214048 -4.153540 -0.944072  
H 4.882911 -2.828564 -3.033110  
H 3.217377 -0.976958 -3.064248  
C 0.400257 0.244335 -2.507234  
C -1.079036 -0.167226 -2.330763  
P -1.688877 0.031172 -0.577969  
C -3.498761 -0.182200 -0.642191  
C -4.119407 -0.966822 -1.628632  
C -5.501112 -1.176426 -1.589159  
C -6.270554 -0.611219 -0.568731  
C -5.656273 0.168917 0.417379  
C -4.277511 0.381204 0.384824  
H -3.805386 0.990630 1.159705  
H -6.253794 0.613627 1.216801  
H -7.349986 -0.778314 -0.540961  
H -5.976422 -1.785548 -2.361749  
H -3.538138 -1.422056 -2.432611  
C -1.403498 1.784631 -0.124194  
C -1.863466 2.851986 -0.910470  
C -1.603804 4.173513 -0.547438  
C -0.883953 4.433712 0.622210  
C -0.422983 3.390506 1.428928  
C -0.678024 2.066485 1.055035  
O -0.222548 0.989847 1.788489  
C 0.269248 1.199021 3.116888  
H -0.480462 1.722692 3.729979  
H 0.444277 0.202922 3.542183  
H 1.212680 1.765485 3.103792  
H 0.146046 3.619805 2.328699  
H -0.672176 5.464359 0.916402  
H -1.963678 4.995601 -1.169445  
H -2.436628 2.638864 -1.816886  
H -1.210937 -1.236917 -2.553957  
H -1.725156 0.395285 -3.022268  
H 0.871406 -0.326838 -3.320710  
H 0.453412 1.306116 -2.781300

#### <sup>45</sup>A-01

Geometry with 71 atoms:

Total energy: -2967.044793450

Cr -0.065208 -0.811324 1.083741  
C 0.073744 -2.583737 0.059921  
C 1.074234 -3.588694 0.630366  
H 1.128195 -4.446253 -0.067174  
H 2.094188 -3.160255 0.633227  
C 0.725898 -4.129766 2.026633  
H 1.232970 -5.096524 2.179719  
C 1.116135 -3.219711 3.200165  
C 0.616479 -1.770542 3.123051  
C -0.841177 -1.538343 2.808725  
H -1.319143 -0.762597 3.428221  
H 1.464209 -2.440183 2.763620  
H 0.956563 -1.202124 4.004664  
H 1.293560 -1.268691 2.316647  
H 0.733697 -3.654201 4.139197  
H 2.216126 -3.202325 3.292249  
H -0.354745 -4.353052 2.062918  
H 0.339058 -2.319777 -0.978511  
H -0.945671 -3.007063 0.049922  
P -1.759303 0.093501 -0.451672  
C -3.348990 -0.738942 -0.783437  
C -4.211271 -0.281173 -1.794945  
C -5.425934 -0.929585 -2.021901  
C -5.789377 -2.032607 -1.239557  
C -4.938696 -2.485312 -0.227485  
C -3.719654 -1.840766 0.003658  
H -3.056884 -2.190540 0.798212  
H -5.223549 -3.343147 0.386369  
H -6.741657 -2.537704 -1.419176  
H -6.094227 -0.571517 -2.808724  
H -3.941424 0.587522 -2.401173  
C -2.138330 1.825370 0.025347  
C -2.268010 2.870787 -0.904464  
C -2.518656 4.173956 -0.466566  
C -2.648172 4.445697 0.899298  
C -2.531957 3.409644 1.831340  
C -2.276116 2.106368 1.397635  
H -2.191541 1.299443 2.132152

H -2.640585 3.615955 2.898872  
H -2.842264 5.466621 1.236883  
H -2.612996 4.981316 -1.196825  
H -2.169657 2.679973 -1.975284  
C -0.889167 0.207595 -2.091494  
C 0.443518 0.964186 -1.988260  
P 1.509701 0.431903 -0.541905  
C 2.800716 -0.690754 -1.185369  
C 2.665606 -1.365246 -2.408880  
C 3.615327 -2.316089 -2.797398  
C 4.705653 -2.600383 -1.971881  
C 4.844712 -1.934235 -0.748587  
C 3.894410 -0.992636 -0.351838  
H 4.007962 -0.484964 0.610141  
H 5.695038 -2.153082 -0.098158  
H 5.446646 -3.342129 -2.279053  
H 3.499327 -2.835527 -3.751640  
H 1.817969 -1.164926 -3.067382  
C 2.337949 1.981818 -0.028734  
C 1.643358 2.811427 0.870664  
C 2.186664 4.037015 1.261529  
C 3.432052 4.438371 0.766775  
C 4.128250 3.615807 -0.125075  
C 3.584753 2.392575 -0.527660  
H 4.133999 1.759493 -1.228071  
H 5.099867 3.929566 -0.514552  
H 3.861452 5.394103 1.077085  
H 1.637358 4.677087 1.956173  
H 0.665315 2.509312 1.257772  
H 0.259531 2.034435 -1.812323  
H 1.015235 0.896229 -2.926703  
H -0.746263 -0.835954 -2.413930  
H -1.543896 0.679633 -2.840948

<sup>45</sup>A-02

Geometry with 71 atoms:

Total energy: -2967.043244440  
Cr -0.288916 -0.812608 1.071587  
C -0.678645 -2.572771 0.092682  
C -0.403640 -3.848792 0.891172  
H -0.573942 -4.712017 0.219756  
H 0.663776 -3.919138 1.177712  
C -1.277863 -4.036558 2.142527  
H -1.325896 -5.108359 2.395034  
C -0.792743 -3.293178 3.395758  
C -0.542796 -1.788290 3.227709  
C -1.629532 -0.973329 2.572954  
H -1.823511 0.001187 3.049662  
H -2.563916 -1.505779 2.358630  
H -0.193965 -1.349829 4.177594  
H 0.443216 -1.711947 2.614998  
H -1.536001 -3.418450 4.201209  
H 0.138050 -3.763918 3.757574  
H -2.313593 -3.741183 1.901143  
H -0.064993 -2.537585 -0.825917  
H -1.741723 -2.531715 -0.202165  
P -1.576228 0.482761 -0.546613  
C -3.246175 -0.106140 -0.970027  
C -4.209353 -0.103107 0.056565  
C -5.499943 -0.569678 -0.191603  
C -5.838807 -1.054342 -1.460700  
C -4.884004 -1.067280 -2.480459  
C -3.589229 -0.594142 -2.240792  
H -2.859359 -0.611387 -3.052298  
H -5.145129 -1.445775 -3.471602  
H -6.849175 -1.423473 -1.652522  
H -6.243876 -0.559064 0.608701  
H -3.947447 0.267724 1.050891  
C -1.729630 2.263220 -0.143103  
C -2.681430 3.085263 -0.770122  
C -2.726150 4.450283 -0.477094  
C -1.823588 5.005763 0.437100  
C -0.876756 4.193215 1.067835  
C -0.834216 2.825994 0.783500  
H -0.091843 2.199094 1.286324  
H -0.172458 4.620860 1.785270  
H -1.862303 6.074509 0.661555  
H -3.470380 5.084426 -0.964959  
H -3.393033 2.659157 -1.481675  
C -0.547724 0.447525 -2.094699  
C 0.861175 0.986323 -1.804493

P 1.708192 0.075747 -0.400605  
C 2.824372 -1.136144 -1.214221  
C 3.689381 -0.758517 -2.256533  
C 4.539916 -1.699808 -2.838225  
C 4.541588 -3.023661 -2.381507  
C 3.695088 -3.402474 -1.336912  
C 2.839701 -2.461950 -0.754316  
H 2.181829 -2.764193 0.061696  
H 3.696643 -4.432789 -0.973112  
H 5.208355 -3.758275 -2.839670  
H 5.208638 -1.399363 -3.648513  
H 3.712857 0.275772 -2.609548  
C 2.834767 1.318270 0.346217  
C 3.224801 1.123936 1.682797  
C 4.103798 2.016496 2.301834  
C 4.597304 3.115933 1.592927  
C 4.213397 3.317611 0.263185  
C 3.338468 2.424247 -0.360349  
H 3.057297 2.598116 -1.401369  
H 4.599608 4.174238 -0.294618  
H 5.282619 3.816309 2.076375  
H 4.402240 1.853537 3.340284  
H 2.848298 0.263523 2.244606  
H 0.798942 2.043498 -1.505734  
H 1.479194 0.938849 -2.712897  
H -0.512059 -0.600048 -2.436087  
H -1.031639 1.044811 -2.883805

<sup>45</sup>A-03

Geometry with 71 atoms:

Total energy: -2967.044626050  
Cr -0.074973 -0.133272 1.312919  
C -0.005691 -2.172871 1.279251  
C 0.826887 -2.844435 2.369993  
H 0.842509 -3.932096 2.164669  
H 1.885562 -2.529505 2.303908  
C 0.312255 -2.634757 3.802478  
H 0.705243 -3.433827 4.452193  
C 0.697197 -1.292849 4.441172  
C 0.351532 -0.038629 3.627343  
C -1.043520 0.084420 3.071797  
H -1.482029 1.089023 3.176077  
H -1.754276 -0.695962 3.370532  
H 0.677311 0.867056 4.165755  
H 1.131243 -0.018900 2.759120  
H 0.198493 -1.200241 5.420696  
H 1.782373 -1.287751 4.644521  
H -0.784645 -2.758442 3.809061  
H 0.383949 -2.423897 0.276295  
H -1.060120 -2.491994 1.338870  
P -1.712149 0.163588 -0.541294  
C -3.069457 -1.015500 -0.886477  
C -2.744624 -2.375420 -1.045816  
C -3.745552 -3.307021 -1.327730  
C -5.077274 -2.894085 -1.443215  
C -5.404241 -1.544918 -1.281659  
C -4.406857 -0.604957 -1.005732  
H -4.676352 0.446176 -0.888055  
H -6.442459 -1.216777 -1.373768  
H -5.860257 -3.624964 -1.659065  
H -3.484169 -4.360614 -1.452454  
H -1.710841 -2.714132 -0.949436  
C -2.478676 1.820636 -0.378274  
C -2.416141 2.802899 -1.380988  
C -3.012331 4.051830 -1.179863  
C -3.681983 4.328881 0.015230  
C -3.755157 3.353500 1.015856  
C -3.150966 2.109518 0.825695  
H -3.211359 1.353088 1.612002  
H -4.282068 3.563106 1.949900  
H -4.148566 5.305223 0.167232  
H -2.956711 4.809259 -1.965523  
H -1.911198 2.606660 -2.328474  
C -0.731140 0.182974 -2.123627  
C 0.591205 0.949065 -1.997358  
P 1.639010 0.335838 -0.584586  
C 2.496863 -1.164109 -1.186364  
C 3.324797 -1.841109 -0.271299  
C 3.984407 -3.011726 -0.645932  
C 3.813677 -3.530672 -1.934776  
C 2.987757 -2.869190 -2.846727

C 2.332509 -1.688874 -2.478427  
H 1.699426 -1.188310 -3.213508  
H 2.852925 -3.268951 -3.854718  
H 4.324782 -4.451374 -2.226295  
H 4.629452 -3.524114 0.071840  
H 3.457915 -1.447700 0.740303  
C 2.928574 1.622865 -0.401626  
C 4.172416 1.549018 -1.049415  
C 5.109093 2.572445 -0.879974  
C 4.811661 3.674140 -0.071232  
C 3.573409 3.753843 0.574911  
C 2.637816 2.729178 0.415970  
H 1.675207 2.794351 0.933656  
H 3.339123 4.611128 1.210672  
H 5.548084 4.470849 0.059375  
H 6.076894 2.508064 -1.383256  
H 4.413860 0.690055 -1.679838  
H 0.411819 2.013025 -1.776253  
H 1.164374 0.919649 -2.937189  
H -0.554188 -0.877927 -2.367104  
H -1.355544 0.583303 -2.937772

<sup>45</sup>A-04

Geometry with 71 atoms:

Total energy: -2967.044961430  
Cr -0.166692 -0.697516 1.138523  
C -0.440587 -2.540447 0.285326  
C 0.004241 -3.741189 1.122425  
H -0.140767 -4.651550 0.509779  
H 1.092169 -3.705841 1.322156  
C -0.749810 -3.934300 2.448311  
H -0.669641 -4.988162 2.761198  
C -0.248279 -3.071505 3.615427  
C -0.174842 -1.561784 3.349225  
C -1.387621 -0.904023 2.738941  
H -1.665967 0.057622 3.198565  
H -2.267000 -1.547149 2.611122  
H 0.192708 -1.031817 4.243609  
H 0.752714 -1.420197 2.658963  
H -0.908013 -3.222748 4.486416  
H 0.753051 -3.422407 3.920746  
H -1.825371 -3.755863 2.276859  
H 0.115363 -2.500035 -0.669375  
H -1.517925 -2.612258 0.057448  
P -1.602304 0.357876 -0.551943  
C -3.171025 -0.484064 -0.950583  
C -4.159587 -0.515044 0.050412  
C -5.363993 -1.181828 -0.174009  
C -5.589479 -1.832096 -1.393230  
C -4.608024 -1.810258 -2.387022  
C -3.399500 -1.139298 -2.170612  
H -2.646670 -1.135665 -2.960723  
H -4.780650 -2.316990 -3.339656  
H -6.531891 -2.357139 -1.566977  
H -6.128892 -1.197557 0.606176  
H -3.985895 -0.016154 1.007897  
C -2.026654 2.118311 -0.273075  
C -2.673785 2.869885 -1.279832  
C -2.960814 4.218640 -1.054679  
C -2.608943 4.828957 0.155595  
C -1.975439 4.086429 1.155190  
C -1.686786 2.734187 0.942935  
H -1.204072 2.158324 1.736719  
H -1.708923 4.556864 2.104644  
H -2.836208 5.885056 0.320106  
H -3.464523 4.796776 -1.833124  
H -2.963551 2.400952 -2.213859  
C -0.575576 0.369635 -2.099793  
C 0.781582 1.034053 -1.833389  
P 1.718059 0.212773 -0.431524  
C 2.863735 -0.976400 -1.220623  
C 3.069785 -2.221489 -0.604813  
C 3.961429 -3.145885 -1.156601  
C 4.653100 -2.833628 -2.329862  
C 4.458715 -1.592182 -2.946848  
C 3.571777 -0.665529 -2.395529  
H 3.446200 0.306121 -2.879064  
H 5.005014 -1.342642 -3.859736  
H 5.347674 -3.556644 -2.764529  
H 4.111875 -4.112075 -0.669069  
H 2.531780 -2.473314 0.310724



C 2.774244 1.555162 0.247395  
 C 4.161509 1.404648 0.406332  
 C 4.914244 2.420621 1.004115  
 C 4.294552 3.591223 1.449736  
 C 2.911800 3.744798 1.300441  
 C 2.154055 2.731968 0.709669  
 H 1.074546 2.871636 0.604585  
 H 2.418938 4.657157 1.645471  
 H 4.887231 4.383619 1.913071  
 H 5.993826 2.294672 1.117567  
 H 4.661779 0.497973 0.060230  
 H 0.643595 2.089083 -1.551538  
 H 1.397735 1.031601 -2.744463  
 H -0.447405 -0.678883 -2.413814  
 H -1.112699 0.892875 -2.906495

<sup>45</sup>A-05

Geometry with 71 atoms:

Total energy: -2967.044132920

Cr 0.102970 -0.409667 1.246288  
 C 1.562693 -0.417940 2.682304  
 C 1.256433 -1.178168 3.979030  
 H 2.086714 -1.027121 4.694414  
 H 0.366920 -0.750088 4.481286  
 C 1.050731 -2.691912 3.790819  
 H 1.265039 -3.214530 4.737459  
 C -0.362797 -3.103416 3.351783  
 C -0.922852 -2.383586 2.117686  
 C -0.065549 -2.372174 0.874078  
 H -0.590437 -2.626367 -0.056305  
 H 0.889604 -2.906320 0.948808  
 H -1.951088 -2.719288 1.905117  
 H -1.140366 -1.303646 2.459490  
 H -0.377071 -4.186283 3.140673  
 H -1.060847 -2.942522 4.191797  
 H 1.797609 -3.067257 3.068972  
 H 1.648844 0.675027 2.876909  
 H 2.541190 -0.730523 2.277493  
 P 1.544876 0.330815 -0.616111  
 C 2.836197 1.582747 -0.285544  
 C 2.489228 2.674962 0.529943  
 C 3.422711 3.676508 0.800014  
 C 4.714210 3.588388 0.268499  
 C 5.066186 2.500885 -0.536151  
 C 4.132481 1.498590 -0.816978  
 H 4.417838 0.653164 -1.446632  
 H 6.074879 2.429916 -0.950205  
 H 5.448089 4.368210 0.485744  
 H 3.144880 4.523257 1.432244  
 H 1.483450 2.748645 0.954755  
 C 2.361526 -1.087880 -1.431298  
 C 2.201974 -1.381672 -2.795289  
 C 2.842181 -2.493090 -3.353983  
 C 3.648346 -3.313678 -2.561379  
 C 3.812757 -3.025156 -1.201726  
 C 3.168257 -1.924353 -0.636692  
 H 3.297914 -1.712207 0.426617  
 H 4.442628 -3.662883 -0.576931  
 H 4.149587 -4.178918 -3.001880  
 H 2.711917 -2.712895 -4.416379  
 H 1.585855 -0.750860 -3.438192  
 C 0.442416 1.130957 -1.883761  
 C -0.889053 0.389336 -2.045819  
 P -1.782370 0.286955 -0.409605  
 C -2.400080 1.992477 -0.153755  
 C -3.164877 2.660435 -1.127009  
 C -3.581528 3.974873 -0.911209  
 C -3.241540 4.635103 0.276261  
 C -2.488128 3.977811 1.252353  
 C -2.070301 2.660421 1.037772  
 H -1.488073 2.149035 1.811491  
 H -2.227416 4.488430 2.182408  
 H -3.569262 5.664467 0.440614  
 H -4.176189 4.487372 -1.671313  
 H -3.444954 2.148966 -2.051822  
 C -3.246896 -0.763220 -0.730918  
 C -3.093235 -1.989373 -1.405592  
 C -4.186264 -2.842141 -1.576676  
 C -5.441275 -2.487520 -1.071844  
 C -5.599162 -1.275023 -0.394014  
 C -4.510127 -0.416540 -0.220326

H -4.650798 0.529395 0.307389  
 H -6.577533 -0.991315 0.001497  
 H -6.295065 -3.155671 -1.207327  
 H -4.055137 -3.787718 -2.108457  
 H -2.122447 -2.288446 -1.807329  
 H -0.723800 -0.641390 -2.395836  
 H -1.530960 0.889802 -2.787495  
 H 0.275405 2.156727 -1.516131  
 H 0.976233 1.229404 -2.841592

<sup>45</sup>A-06

Geometry with 71 atoms:

Total energy: -2967.045863700

Cr -0.151750 -0.663254 1.154655  
 C -0.346677 -2.476395 0.224191  
 C 0.304146 -3.646623 0.962810  
 H 0.223143 -4.540473 0.315143  
 H 1.392254 -3.479762 1.079111  
 C -0.325184 -3.985478 2.324816  
 H -0.117013 -5.039751 2.570162  
 C 0.167929 -3.136578 3.505973  
 C 0.093994 -1.615735 3.313592  
 C -1.212845 -1.032693 2.831748  
 H -1.511155 -0.100394 3.338632  
 H -2.051607 -1.737413 2.771608  
 H 0.489483 -1.097815 4.203346  
 H 0.951193 -1.375076 2.564146  
 H -0.418715 -3.389756 4.405241  
 H 1.214160 -3.407197 3.731593  
 H -1.423249 -3.912336 2.236657  
 H 0.094974 -2.355194 -0.780923  
 H -1.431605 -2.643335 0.107800  
 P -1.673367 0.387553 -0.466005  
 C -3.252987 -0.455011 -0.806950  
 C -4.073311 -0.760034 0.294876  
 C -5.291556 -1.412738 0.103740  
 C -5.696641 -1.778189 -1.185223  
 C -4.882803 -1.483794 -2.282257  
 C -3.664187 -0.822460 -2.098786  
 H -3.047221 -0.599048 -2.971081  
 H -5.195979 -1.768130 -3.289772  
 H -6.647633 -2.295446 -1.333779  
 H -5.923801 -1.644066 0.964285  
 H -3.754986 -0.487715 1.304553  
 C -2.062128 2.151138 -0.153256  
 C -3.261057 2.740966 -0.586406  
 C -3.495242 4.099144 -0.355025  
 C -2.539178 4.878271 0.304875  
 C -1.344170 4.296886 0.740355  
 C -1.108588 2.938162 0.518387  
 H -0.170219 2.499048 0.867226  
 H -0.594024 4.899625 1.257927  
 H -2.727681 5.939690 0.483406  
 H -4.431228 4.551027 -0.692354  
 H -4.015249 2.141070 -1.100820  
 C -0.714708 0.402598 -2.061635  
 C 0.684015 1.007249 -1.867551  
 P 1.649510 0.244643 -0.454538  
 C 2.733515 -1.028608 -1.202057  
 C 2.381432 -1.702649 -2.383234  
 C 3.185066 -2.739351 -2.868235  
 C 4.341914 -3.114259 -2.180080  
 C 4.696331 -2.448646 -1.001405  
 C 3.896330 -1.415161 -0.510845  
 H 4.186867 -0.899230 0.408316  
 H 5.602179 -2.734321 -0.461044  
 H 4.968485 -3.923900 -2.561651  
 H 2.903952 -3.254771 -3.789834  
 H 1.480773 -1.429120 -2.936879  
 C 2.771930 1.586648 0.083066  
 C 2.660995 2.090906 1.389137  
 C 3.473183 3.149157 1.809948  
 C 4.402924 3.706098 0.927981  
 C 4.524644 3.203169 -0.373423  
 C 3.715271 2.147569 -0.796108  
 H 3.822604 1.752353 -1.809541  
 H 5.256148 3.634973 -1.060753  
 H 5.039132 4.531999 1.255356  
 H 3.381901 3.534279 2.828379  
 H 1.941624 1.655630 2.089496  
 H 0.600396 2.076049 -1.616232

H 1.268883 0.944555 -2.798053  
 H -0.659741 -0.644714 -2.399007  
 H -1.271325 0.972474 -2.822346

<sup>45</sup>A-07

Geometry with 71 atoms:

Total energy: -2967.045032880

Cr 0.195131 -0.643210 1.161800  
 C 1.735321 -0.766261 2.506563  
 C 1.645589 -1.873940 3.562937  
 H 2.486096 -1.764897 4.274207  
 H 0.733443 -1.755735 4.180038  
 C 1.685936 -3.299191 2.983692  
 H 2.045612 -4.000662 3.754311  
 C 0.337186 -3.831711 2.475921  
 C -0.414690 -2.935826 1.482097  
 C 0.350346 -2.441358 0.127644  
 H -0.189392 -2.539130 -0.676282  
 H 1.384287 -2.799405 0.194242  
 H -1.375302 -3.393135 1.194801  
 H -0.803655 -2.042792 2.099362  
 H 0.493989 -4.809407 1.989023  
 H -0.323695 -4.019252 3.340248  
 H 2.437861 -3.333936 2.175668  
 H 1.671098 0.238180 2.983304  
 H 2.709750 -0.810546 1.989505  
 P 1.500184 0.504027 -0.542576  
 C 1.869583 2.276588 -0.273133  
 C 2.526063 3.033795 -1.260506  
 C 2.762352 4.394290 -1.058601  
 C 2.347906 5.012079 0.127808  
 C 1.700491 4.265980 1.115574  
 C 1.463731 2.902075 0.916829  
 H 0.970287 2.326303 1.703956  
 H 1.382650 4.743469 2.045454  
 H 2.535550 6.077394 0.828247  
 H 3.274370 4.975982 -1.288910  
 H 2.863756 2.558795 -2.185256  
 C 3.080907 -0.288161 -0.994792  
 C 4.273794 0.150394 -0.393225  
 C 5.473830 -0.518081 -0.646607  
 C 5.495638 -1.628023 -1.496658  
 C 4.311184 -2.070932 -2.093563  
 C 3.106398 -1.409706 -1.841643  
 H 2.191290 -1.777757 -2.309448  
 H 4.322839 -2.937366 -2.759228  
 H 6.435953 -2.148467 -1.693921  
 H 6.396041 -0.168253 -0.176430  
 H 4.270697 1.017914 0.270508  
 C 0.434376 0.498322 -2.069335  
 C -0.943084 1.098133 -1.758596  
 P -1.787107 0.237586 -0.335148  
 C -3.065550 1.426207 0.213382  
 C -4.311476 1.538129 -0.427367  
 C -5.236004 2.491376 0.005599  
 C -4.926222 3.338931 1.075102  
 C -3.688840 3.231714 1.171734  
 C -2.763156 2.275647 1.291228  
 H -1.799446 2.193762 1.802898  
 H -3.446307 3.888614 2.556119  
 H -5.653485 4.081813 1.411569  
 H -6.203741 2.573490 -0.495247  
 H -4.563150 0.876824 -1.259985  
 C -2.697208 -1.181701 -1.053196  
 C -3.528053 -1.921205 -0.189737  
 C -4.191055 -3.059989 -0.648578  
 C -4.020957 -3.486695 -1.971024  
 C -3.192555 -2.763298 -2.831913  
 C -2.533764 -1.614532 -3.378917  
 H -1.897025 -1.066131 -3.075623  
 H -3.058272 -3.089218 -3.866252  
 H -4.535672 -4.381725 -2.328462  
 H -4.841728 -3.618479 0.028766  
 H -3.666446 -1.599356 0.846622  
 H -1.595040 1.096588 -2.646065  
 H -0.844133 2.149683 -1.445133  
 H 0.939344 1.059005 -2.871562  
 H 0.344190 -0.547632 -2.399738

<sup>45</sup>A-08

Geometry with 71 atoms:

Total energy: -2967.044812830  
 Cr -0.014214 -0.563426 1.192561  
 C 0.156242 -2.459540 0.438712  
 C 1.005083 -3.406093 1.286193  
 H 1.104138 -4.358502 0.730778  
 H 2.040240 -3.025625 1.382303  
 C 0.429866 -3.725241 2.676719  
 H 0.840816 -4.685552 3.028681  
 C 0.718683 -2.679940 3.763638  
 C 0.336314 -1.233882 3.420807  
 C -1.047771 -0.965901 2.888157  
 H -1.549856 -0.093785 3.333941  
 H -1.720710 -1.832013 2.852164  
 H 0.610181 -0.558862 4.248607  
 H 1.141407 -0.898395 2.644005  
 H 0.182759 -2.957403 4.686933  
 H 1.794676 -2.704608 4.009976  
 H -0.658567 -3.884399 2.582423  
 H 0.568168 -2.362086 -0.581627  
 H -0.880630 -2.825869 0.352038  
 P -1.654119 0.211556 -0.492492  
 C -2.551248 -1.179079 -1.269169  
 C -2.261333 -1.649937 -2.558982  
 C -2.923752 -2.776580 -3.058784  
 C -3.875748 -3.437502 -2.279328  
 C -4.169496 -2.970210 -0.992642  
 C -3.507856 -1.851517 -0.486291  
 H -3.738675 -1.495949 0.521720  
 H -4.915549 -3.481993 -0.379953  
 H -4.390567 -4.317252 -2.672842  
 H -2.692985 -3.135827 -4.064617  
 H -1.522693 -1.151641 -3.189520  
 C -2.931491 1.427428 -0.009058  
 C -4.013683 1.713677 -0.859716  
 C -4.955855 2.675864 -0.491206  
 C -4.827189 3.357617 0.724548  
 C -3.755724 3.074325 1.576224  
 C -2.811439 2.109585 1.213164  
 H -1.990638 1.878264 1.896592  
 H -3.659074 3.597175 2.530727  
 H -5.569391 4.106480 1.011364  
 H -5.797599 2.891736 -1.153654  
 H -4.128498 1.175656 -1.804208  
 C -0.687722 1.057307 -1.846184  
 C 0.711629 0.459916 -2.052115  
 P 1.672531 0.429928 -0.453403  
 C 3.258200 -0.395083 -0.820128  
 C 4.090653 -0.707311 0.270847  
 C 5.318002 -1.338421 0.064738  
 C 5.721264 -1.678177 -1.231622  
 C 4.895998 -1.379705 -2.318944  
 C 3.669325 -0.738263 -2.118805  
 H 3.045474 -0.508736 -2.984657  
 H 5.207663 -1.643484 -3.332513  
 H 6.679433 -2.177905 -1.393258  
 H 5.958853 -1.571909 0.918306  
 H 3.780818 -0.451092 1.288464  
 C 2.060263 2.201979 -0.160819  
 C 1.105891 2.986790 0.514144  
 C 1.331753 4.348532 0.729173  
 C 2.519875 4.937004 0.284833  
 C 3.477371 4.161604 -0.377447  
 C 3.251403 2.800756 -0.602732  
 H 4.006424 2.204887 -1.120811  
 H 4.407684 4.619359 -0.722573  
 H 2.701277 6.000577 0.457826  
 H 0.579878 4.948315 1.247789  
 H 0.170457 2.543525 0.868811  
 H 1.264159 1.041051 -2.807231  
 H 0.651828 -0.581849 -2.405704  
 H -1.266658 1.045727 -2.782615  
 H -0.614337 2.111935 -1.538240

<sup>45</sup>A-09

Geometry with 71 atoms:  
 Total energy: -2967.044922040  
 Cr -0.164873 -0.782785 1.102237  
 C -0.305647 -2.637197 0.236024  
 C 0.179562 -3.829073 1.062847  
 H 0.083209 -4.736665 0.436668  
 H 1.261878 -3.748069 1.278899

C -0.582795 -4.071712 2.375440  
 H -0.454473 -5.123065 2.680611  
 C -0.138932 -3.194539 3.554610  
 C -0.137476 -1.681376 3.298826  
 H -1.378627 -1.072162 2.696230  
 H -1.712420 -0.143604 3.183928  
 H -2.222840 -1.755011 2.538668  
 H 0.206641 -1.140988 4.196233  
 H 0.780761 -1.495011 2.606779  
 H -0.800167 -3.384393 4.416826  
 H 0.875233 -3.497541 3.868753  
 H -1.663672 -3.945039 2.190868  
 H 0.255292 -2.563557 -0.713009  
 H -1.377603 -2.752693 -0.001160  
 P -1.633782 0.266158 -0.577355  
 C -3.240480 -0.500669 -0.987082  
 C -3.300861 -3.292271 -1.823724  
 C -4.526504 -2.253025 -2.070493  
 C -5.696625 -1.763629 -1.482091  
 H -5.639768 -0.644655 -0.645301  
 C -4.418846 -0.013673 -0.395884  
 H -4.388076 0.862776 0.255622  
 H -6.551606 -0.257106 -0.184571  
 H -6.653435 -2.254165 -1.676680  
 H -4.565216 -3.125627 -2.727041  
 H -2.398150 -2.029652 -2.288953  
 C -1.961607 2.039314 -0.253148  
 C -1.922826 2.506590 1.072191  
 C -2.145154 3.858280 1.352937  
 C -2.403499 4.753626 0.311601  
 C -2.449767 4.294933 -1.010258  
 C -2.235259 2.944781 -1.293723  
 H -2.286008 2.602050 -2.329501  
 H -2.658298 4.992677 -1.824794  
 H -2.573478 5.811036 0.528502  
 H -2.114862 4.213003 2.386726  
 H -1.720837 1.812090 1.891294  
 C -0.622988 0.231409 -2.137517  
 C 0.734369 0.915235 -1.926380  
 P 1.678843 0.204444 -0.467325  
 C 2.961086 -0.889556 -1.179038  
 C 3.207394 -2.128255 -0.565541  
 C 4.199452 -2.979157 -1.061875  
 C 4.952745 -2.598370 -2.175280  
 C 4.719046 -1.361561 -2.788444  
 C 3.731197 -0.508523 -2.293428  
 H 3.575169 0.462324 -2.770507  
 H 5.312992 -1.058461 -3.654127  
 H 5.726009 -3.264056 -2.566492  
 H 4.380363 -3.941746 -0.577531  
 H 2.621492 -2.432928 0.303317  
 C 2.577633 1.645738 0.233746  
 C 3.961394 1.623592 0.472879  
 C 4.583478 2.713003 1.091301  
 C 3.835604 3.827865 1.480299  
 C 2.454971 3.851483 1.253828  
 C 1.827351 2.765776 0.640658  
 H 0.746624 2.800059 0.478915  
 H 1.861417 4.717873 1.556287  
 H 4.327155 4.677089 1.961044  
 H 5.661803 2.688686 1.267060  
 H 4.559756 0.760678 0.173158  
 H 0.598923 1.989882 -1.733284  
 H 1.348867 0.829764 -2.834465  
 H -0.488817 -0.830102 -2.400711  
 H -1.178304 0.698140 -2.966073

<sup>45</sup>A-10

Geometry with 71 atoms:  
 Total energy: -2967.042818690  
 Cr 0.068141 -0.529830 1.222509  
 C 1.423414 -0.512591 2.708208  
 C 0.318050 -1.140221 3.533566  
 H 0.065944 -0.521694 4.410912  
 H -0.689923 -1.095610 2.965371  
 C 0.508791 -2.614203 3.938378  
 H -0.066517 -2.807380 4.858480  
 C 0.101768 -3.665580 2.895589  
 C 0.689075 -3.507408 1.482754  
 C -0.020275 -2.477838 0.604085  
 H -1.102766 -2.700537 0.552577

H 0.383613 -2.487935 -0.422728  
 H 1.771203 -3.294363 1.538644  
 H 0.613404 -4.489387 0.977001  
 H 0.386941 -4.652699 3.295339  
 H -1.001055 -3.684208 2.813199  
 H 1.570342 -2.749095 4.206547  
 H 1.670295 0.523206 2.993797  
 H 2.337926 -1.113123 2.621783  
 P -1.806430 0.202117 -0.384415  
 C -3.329696 -0.757692 -0.709889  
 C -4.588453 -0.302684 -0.281107  
 C -5.724649 -1.093359 -0.475571  
 C -5.617821 -2.342149 -1.094472  
 C -4.366846 -2.803682 -1.517070  
 C -3.226403 -2.021399 -1.322258  
 H -2.256686 -2.405064 -1.648201  
 H -4.276010 -3.780116 -1.999135  
 H -6.508528 -2.956329 -1.246971  
 H -6.699116 -0.727384 -0.142889  
 H -4.689352 0.672846 0.199640  
 C -2.314198 1.939835 -0.101429  
 C -1.971974 2.553824 1.115926  
 C -2.290987 3.895072 1.351329  
 C -2.958047 4.632840 3.700049  
 C -3.310002 4.028482 -0.843131  
 C -2.990568 2.690315 -1.080155  
 H -3.275693 2.228152 -2.028735  
 H -3.836415 4.604113 -1.608339  
 H -3.208123 5.681199 0.550186  
 H -2.020749 4.361315 2.301780  
 H -1.458086 1.982570 1.895690  
 C -0.926516 0.276158 -2.031231  
 C 0.384123 1.061166 -1.906795  
 P 1.500848 0.368962 -0.587457  
 C 2.494865 -0.956532 -1.356881  
 C 3.385816 -1.664045 -0.527801  
 C 4.138350 -2.719625 -1.029207  
 C 3.997555 -3.092809 -2.384744  
 C 3.107242 -2.401317 -3.209719  
 C 2.358140 -1.334241 -2.701765  
 H 1.671244 -0.808654 -3.367718  
 H 2.993484 -2.689444 -4.257569  
 H 4.581174 -3.925008 -2.785590  
 H 4.831690 -3.258419 -0.392697  
 H 3.488410 -1.388324 0.524595  
 C 2.639151 1.745630 -0.195705  
 C 2.155930 2.779837 0.626435  
 C 2.970233 3.870668 0.934969  
 C 4.276087 3.932066 0.435433  
 C 4.762212 2.903498 -0.376674  
 C 3.948744 1.811812 -0.695668  
 H 4.337943 1.013621 -1.331181  
 H 5.781563 2.949275 -0.767598  
 H 4.915769 4.782857 0.682303  
 H 2.587361 4.672167 1.571313  
 H 1.137170 2.740595 1.024203  
 H 0.184082 2.100055 -1.599190  
 H 0.920416 1.120534 -2.866184  
 H -0.742986 -0.763025 -2.347116  
 H -1.588283 0.732081 -2.784036

<sup>45</sup>A-11

Geometry with 71 atoms:  
 Total energy: -2967.042311370  
 Cr 0.159191 -0.652367 1.171769  
 C 1.603647 -0.937291 2.598616  
 C 1.534446 -2.339207 3.212920  
 H 1.899014 -3.076419 2.476969  
 H 2.220423 -2.428646 4.076465  
 C 0.122648 -2.727804 3.675719  
 H -0.129939 -2.161856 4.589993  
 C -0.991357 -2.486868 2.646301  
 C -0.833929 -3.173344 1.261484  
 C 0.170925 -2.493768 0.324048  
 H -0.156128 -2.519716 -0.727132  
 H 1.195347 -2.884828 0.403114  
 H -0.563226 -4.228109 1.448904  
 H -1.823440 -3.186623 0.779016  
 H -1.953696 -2.803847 3.079985  
 H -1.181643 -1.377253 2.548455  
 H 0.102525 -3.793972 3.960155

H 1.321135 -0.165001 3.352366  
H 2.626696 -0.701939 2.261210  
P -1.664328 0.269040 -0.440030  
C -2.768230 -1.045482 -1.075085  
C -2.503323 -1.732645 -2.270485  
C -3.309230 -2.808227 -2.658743  
C -4.385152 -3.205894 -1.861260  
C -4.655573 -2.524890 -0.668638  
C -3.849276 -1.456727 -0.272771  
H -4.070102 -0.934066 0.662036  
H -5.498127 -2.828423 -0.042492  
H -5.014248 -4.044869 -2.167967  
H -3.094523 -3.334462 -3.592019  
H -1.669169 -1.439809 -2.911317  
C -2.755779 1.659943 0.036697  
C -3.943690 1.954575 -0.654253  
C -4.711518 3.060874 -0.283755  
C -4.301163 3.881730 0.772996  
C -3.120010 3.595009 1.463779  
C -2.351715 2.486118 1.099228  
H -1.429387 2.268856 1.646339  
H -2.798508 4.232075 2.291215  
H -4.905664 4.745652 1.059957  
H -5.635179 3.284250 -0.823316  
H -4.272586 1.315722 -1.477409  
C -0.719144 0.938126 -1.907710  
C 0.646269 0.267608 -2.108191  
P 1.627109 0.284154 -0.526800  
C 3.178534 -0.611000 -0.878765  
C 4.408758 -0.123827 -0.404616  
C 5.579521 -0.857999 -0.612057  
C 5.534223 -2.080618 -1.288312  
C 4.311463 -2.573075 -1.755713  
C 3.136470 -1.847554 -1.548511  
H 2.189691 -2.255390 -1.907900  
H 4.270118 -3.529135 -2.283094  
H 6.452001 -2.650790 -1.451009  
H 6.531996 -0.469466 -0.243783  
H 4.458986 0.831194 0.122852  
C 2.065315 2.040647 -0.270682  
C 2.674762 2.798699 -1.286583  
C 2.970261 4.146063 -1.073514  
C 2.663244 4.748683 0.152518  
C 2.064923 4.000752 1.169807  
C 1.768174 2.650828 0.959499  
H 1.315682 2.069159 1.767253  
H 1.832042 4.466096 2.130419  
H 2.896260 5.803845 0.314937  
H 3.444721 4.729100 -1.866482  
H 2.929429 2.336101 -2.243511  
H 1.220039 0.772840 -2.901119  
H 0.541196 -0.786247 -2.408233  
H -1.336170 0.874286 -2.817639  
H -0.584830 2.009994 -1.691038

#### <sup>45</sup>A-12

Geometry with 71 atoms:

Total energy: -2967.041228870  
Cr -0.155005 -0.375573 1.250998  
C -0.218218 -2.367891 0.924824  
C 0.859900 -2.780277 1.933681  
H 0.622228 -3.748778 2.409542  
H 1.813803 -2.920375 1.401601  
C 1.105287 -1.754460 3.074891  
H 1.282480 -0.714334 2.671664  
C 0.072627 -1.694162 4.210717  
C -1.363840 -1.362528 3.778720  
C -1.435255 -0.164858 2.827765  
H -0.981294 0.741549 3.294775  
H -2.475366 0.101135 2.578070  
H -1.817521 -2.244228 3.292745  
H -1.968335 -1.188406 4.688870  
H 0.092078 -2.658585 4.746531  
H 0.413956 -0.933705 4.935112  
H 2.097543 -1.958573 3.509208  
H 0.028183 -2.659466 -0.108645  
H -1.228207 -2.725110 1.173659  
P 1.680444 0.183269 -0.545951  
C 2.909315 1.497948 -0.211199  
C 2.761453 2.283680 0.944572  
C 3.650267 3.330979 1.206552

C 4.695476 3.595561 0.317533  
C 4.853999 2.811826 -0.831879  
C 3.967622 1.766451 -1.097471  
H 4.105557 1.152625 -1.991274  
H 5.674863 3.015638 -1.523761  
H 5.393014 4.411418 0.522177  
H 3.529082 3.935180 2.108820  
H 1.952168 2.078321 1.652256  
C 2.645345 -1.252931 -1.143451  
C 2.315963 -1.959250 -2.311533  
C 3.035895 -3.104810 -2.668072  
C 4.088097 -3.554076 -1.866746  
C 4.422935 -2.853844 -0.701931  
C 3.703664 -1.714862 -0.337812  
H 3.975905 -1.175473 0.573972  
H 5.248520 -3.196939 -0.073681  
H 4.649544 -4.447755 -2.149333  
H 2.772548 -3.644762 -3.580848  
H 1.502878 -1.627525 -2.960009  
C 0.712362 0.834369 -2.003019  
C -0.678665 0.201214 -2.146037  
P -1.663443 0.237937 -0.562015  
C -2.251542 1.965513 -0.388328  
C -3.566990 2.352916 -0.689557  
C -3.960198 3.683751 -0.519003  
C -3.050177 4.635186 -0.048787  
C -1.739406 4.255186 0.258869  
C -1.343796 2.926180 0.097623  
H -0.318298 2.641353 0.351887  
H -1.025343 4.992789 0.632935  
H -3.363873 5.673333 0.084406  
H -4.986710 3.976548 -0.752641  
H -4.289482 1.618355 -1.051628  
C -3.121155 -0.811951 -0.884368  
C -3.664500 -0.944662 -2.175446  
C -4.789649 -1.746456 -2.382735  
C -5.382433 -2.418045 -1.308633  
C -4.847172 -2.289075 -0.023553  
C -3.720166 -1.492090 0.190149  
H -3.302575 -1.402643 1.193539  
H -5.304999 -2.814921 0.817588  
H -6.262005 -3.044699 -1.474979  
H -5.205243 -1.845138 -3.388450  
H -3.221122 -0.422895 -3.025952  
H -0.612716 -0.862944 -2.424065  
H -1.246338 0.715000 -2.937303  
H 0.624214 1.918173 -1.828221  
H 1.293710 0.714293 -2.931038

#### <sup>45</sup>B-01

Geometry with 79 atoms:

Total energy: -3195.955323320  
Cr -0.418964 -0.758624 1.117726  
C 0.979955 -1.136175 2.600316  
C 0.447004 -1.662293 3.943033  
C -0.204161 -3.054343 3.883558  
C -1.647544 -3.085595 3.360366  
C -1.890295 -2.375702 2.021645  
C -0.954601 -2.699967 0.881519  
H -1.455438 -2.955305 -0.062450  
H -0.185543 -3.442177 1.127536  
H -2.949628 -2.455046 1.727911  
H -1.845491 -1.248159 2.278858  
H -2.316466 -2.639572 4.117494  
H -1.968864 -4.134808 3.244995  
H 0.434016 -3.717599 3.273585  
H -0.211862 -3.498459 4.892776  
H 1.281069 -1.711100 4.669026  
H -0.275084 -0.948882 4.389511  
H 1.534791 -0.192158 2.754444  
H 1.715533 -1.855446 2.196056  
P 1.336860 -0.088861 -0.501892  
C 2.373371 1.233567 0.233817  
C 2.002379 2.586374 0.182144  
C 2.753325 3.550461 0.862014  
C 3.878348 3.175223 1.602086  
C 4.251689 1.828103 1.657972  
C 3.504025 0.862004 0.981591  
H 3.804200 -0.186975 1.034066  
H 5.130966 1.525827 2.232195  
H 4.464920 3.930285 2.131126

H 2.455886 4.600832 0.807392  
H 1.127125 2.909909 -0.383551  
C 2.491856 -1.361888 -1.107427  
C 2.342815 -2.699846 -0.716847  
C 3.234622 -3.680489 -1.158995  
C 4.291175 -3.315938 -1.995646  
C 4.462180 -1.988643 -2.402209  
C 3.561840 -1.005282 -1.968650  
O 3.633561 0.296990 -2.320842  
C 4.755464 0.782662 -3.042327  
H 4.809714 0.345121 -4.054135  
H 5.697412 0.581483 -2.503968  
H 4.616722 1.868578 -3.128006  
H 5.292032 -1.728397 -3.058967  
H 4.999428 -4.072038 -2.343890  
H 3.106951 -4.718492 -0.845613  
H 1.520083 -2.969136 -0.054701  
C 0.532110 0.630437 -2.027631  
C -0.831439 -0.010108 -2.309412  
P -1.893602 0.051617 -0.781974  
C -3.556681 -0.506332 -1.282130  
C -4.672909 -0.107246 -0.523605  
C -5.944892 -0.588993 -0.836754  
C -6.117604 -1.479677 -1.902323  
C -5.012246 -1.885816 -2.654464  
C -3.735431 -1.405235 -2.347841  
H -2.886033 -1.736506 -2.948816  
H -5.140900 -2.580352 -3.488220  
H -7.114095 -1.855998 -2.145612  
H -6.806312 -0.266322 -0.246791  
H -4.550663 0.591984 0.307973  
C -2.026869 1.847338 -0.448192  
C -2.659043 2.723226 -1.345353  
C -2.684489 4.098009 -1.113835  
C -2.061591 4.607097 0.028800  
C -1.429461 3.757968 0.940546  
C -1.416958 2.374934 0.710296  
O -0.805634 1.492594 1.585128  
C -0.354973 2.005170 2.853318  
H 0.521492 2.655974 2.716856  
H -1.169762 2.548296 3.355481  
H -0.072499 1.140336 3.459529  
H -0.945315 4.186224 1.816111  
H -2.063877 5.682566 0.221692  
H -3.181236 4.766947 -1.819448  
H -3.141738 2.312429 -2.236292  
H -0.714100 -1.072731 -2.578036  
H -1.336331 0.494409 -3.148454  
H 1.220032 0.503361 -2.874499  
H 0.415899 1.712037 -1.871180

#### <sup>45</sup>B-02

Geometry with 79 atoms:

Total energy: -3195.956956440  
Cr -0.214737 -0.628303 0.853507  
C 0.054614 -2.528914 0.098955  
C 0.982135 -3.428895 0.926994  
C 0.443930 -3.815903 2.315121  
C 0.614554 -2.757571 3.415012  
C 0.105927 -1.349658 3.074516  
C -1.277154 -1.222066 2.483065  
H -1.892099 -0.427181 2.928017  
H -1.837462 -2.160595 2.395872  
H 0.267013 -0.670185 3.928763  
H 0.907394 -0.931117 2.346516  
H 1.683814 -2.684756 3.682849  
H 0.090632 -3.094017 4.325688  
H -0.621259 -4.088831 2.218302  
H 0.953214 -4.730910 2.661056  
H 1.164050 -4.364147 0.364197  
H 1.979436 -2.961831 1.033554  
H 0.442214 -2.452715 -0.933301  
H -0.949347 -2.985703 0.028406  
P -1.899286 0.015597 -0.732836  
C -3.272010 -1.104184 -1.154164  
C -3.269934 -1.851307 -2.342905  
C -4.277112 -2.791242 -2.582033  
C -5.287160 -2.995021 -1.638463  
C -5.285542 -2.261933 -0.446216  
C -4.280462 -1.326271 -0.198344  
H -4.280674 -0.766399 0.739809

H -6.070321 -2.421688 0.297135  
H -6.074634 -3.728083 -1.829113  
H -4.269454 -3.365618 -3.511475  
H -2.485112 -1.714211 -3.089951  
C -2.624263 1.504877 0.048165  
C -3.848877 2.062873 -0.345117  
C -4.345772 3.208605 0.279826  
C -3.611843 3.802625 1.308934  
C -2.387018 3.266472 1.720092  
C -1.893395 2.119620 1.090142  
O -0.686538 1.543772 1.431639  
C 0.167646 2.191572 2.382563  
H 1.109973 1.630295 2.381524  
H -0.280679 2.169662 3.388274  
H 0.376178 3.227179 2.076683  
H -1.836427 3.744478 2.529125  
H -3.993464 4.695911 1.809046  
H -5.302007 3.632603 -0.033253  
H -4.422544 1.584196 -1.142461  
C -1.107655 0.626586 -2.320734  
C 0.346711 0.152823 -2.489191  
P 1.354728 0.319175 -0.923752  
C 1.911768 2.072737 -0.870540  
C 3.274312 2.411705 -0.817031  
C 3.668275 3.749036 -0.711250  
C 2.711616 4.766608 -0.662020  
C 1.352655 4.439812 -0.717398  
C 0.954739 3.104395 -0.811867  
H -0.111951 2.879475 -0.836860  
H 0.595065 5.226948 -0.683213  
H 3.023187 5.811001 -0.583341  
H 4.732484 3.994935 -0.673315  
H 4.037378 1.632859 -0.865503  
C 2.859525 -0.671576 -1.222437  
C 3.231620 -1.167702 -2.479521  
C 4.354802 -1.986673 -2.625497  
C 5.117081 -2.314284 -1.503123  
C 4.773509 -1.827482 -0.238163  
C 3.650111 -1.002829 -0.095157  
O 3.249192 -0.466150 1.087127  
C 3.951417 -0.776208 2.280395  
H 3.947808 -1.859973 2.485512  
H 4.993289 -0.414516 2.241111  
H 3.427594 -0.256159 3.093505  
H 5.382995 -2.093019 0.625224  
H 5.995232 -2.956450 -1.605540  
H 4.630204 -2.365317 -3.611895  
H 2.643627 -0.916647 -3.364225  
H 0.827850 0.691185 -3.320209  
H 0.366106 -0.922171 -2.728738  
H -1.163226 1.723589 -2.285305  
H -1.717726 0.320860 -3.183616

\*5B-03

Geometry with 79 atoms:

Total energy: -3195.958416660  
Cr -0.264470 -0.442652 1.046722  
C -0.199874 -2.416330 0.459185  
C 0.705625 -3.337120 1.285975  
C 0.264622 -3.547696 2.743022  
C 0.635542 -2.417538 3.713674  
C 0.207432 -1.004320 3.292170  
C -1.208405 -0.812630 2.809061  
H -1.719249 0.068161 3.224065  
H -1.842366 -1.705254 2.863898  
H 0.497399 -0.273916 4.066309  
H 0.968174 -0.716050 2.461312  
H 1.729668 -2.418122 3.867287  
H 0.184481 -2.623617 4.699205  
H -0.825393 -3.720684 2.764548  
H 0.718776 -4.474322 3.132322  
H 0.740496 -4.328585 0.795668  
H 1.746284 -2.968236 1.266958  
H 0.120669 -2.433475 -0.598356  
H -1.239693 -2.788979 0.489381  
P -1.940362 0.051974 -0.605680  
C -3.460783 -0.923248 -0.819971  
C -3.934687 -1.339612 -2.074432  
C -5.102959 -2.103666 -2.160457  
C -5.802301 -2.452434 -1.002069  
C -5.330895 -2.042120 0.250490

C -4.161638 -1.286854 0.344548  
H -3.784169 -0.981834 1.324091  
H -5.872194 -2.319512 1.158212  
H -6.714510 -3.049708 -1.073827  
H -5.466619 -2.426461 -3.139004  
H -3.404035 -1.076848 -2.991339  
C -2.448132 1.773084 -0.245923  
C -3.527038 2.387259 -0.897534  
C -3.876583 3.708171 -0.614139  
C -3.138906 4.421701 0.333486  
C -2.062184 3.830468 1.001561  
C -1.716185 2.504248 0.714523  
O -0.662928 1.859820 1.333421  
C 0.019210 2.525603 2.401939  
H 0.769901 1.822964 2.780074  
H -0.680213 2.781079 3.213418  
H 0.530901 3.428701 2.037250  
H -1.507661 4.412367 1.736313  
H -3.401400 5.456579 0.565789  
H -4.720241 4.175681 -1.125839  
H -4.104718 1.814195 -1.627687  
C -1.099870 0.152923 -2.259631  
C 0.190938 0.978399 -2.156275  
P 1.326986 0.375688 -0.807707  
C 2.493450 1.773047 -0.554855  
C 3.015710 1.994163 0.729827  
C 3.900240 3.049809 0.964350  
C 4.270367 3.897944 -0.084183  
C 3.758862 3.682204 -1.367774  
C 2.878175 2.623250 -1.605222  
H 2.500289 2.464215 -2.617671  
H 4.050590 4.338643 -2.191322  
H 4.960432 4.725489 0.098051  
H 4.302682 3.210157 1.967805  
H 2.736283 1.327887 1.547957  
C 2.317214 -0.965125 -1.562695  
C 2.150238 -1.440762 -2.868826  
C 2.898806 -2.526547 -3.335854  
C 3.821466 -3.142270 -2.488854  
C 4.002859 -2.689645 -1.177515  
C 3.248799 -1.606394 -0.712126  
O 3.330616 -1.099657 0.545384  
C 4.291749 -1.605363 1.457146  
H 5.317732 -1.477734 1.071762  
H 4.181762 -1.019526 2.379811  
H 4.115984 -2.670154 1.687495  
H 4.724412 -3.186082 -0.528801  
H 4.411454 -3.989954 -2.845747  
H 2.760208 -2.886458 -4.357447  
H 1.428706 -0.969553 -3.539471  
H -0.046369 2.020661 -1.888039  
H 0.705265 1.014121 -3.128041  
H -1.779442 0.599982 -3.002340  
H -0.893038 -0.883975 -2.570768

\*5B-04

Geometry with 79 atoms:

Total energy: -3195.957504030  
Cr -0.062737 -0.497251 1.169183  
C -1.120567 -1.504197 2.581487  
C 0.259420 -1.818079 3.097351  
C 0.652408 -1.255365 4.469506  
C 0.368679 0.239473 4.671396  
C 0.930745 1.157551 3.575095  
C 0.118825 1.218330 2.277443  
H 0.570730 1.935817 1.576784  
H -0.911891 1.562045 2.480087  
H 1.001405 2.180742 3.991896  
H 1.978267 0.864756 3.364214  
H 0.794098 0.529575 5.646376  
H -0.718185 0.411840 4.758317  
H 1.114115 -1.836635 5.237320  
H 1.727889 -1.445356 4.633588  
H 0.499686 -2.892399 3.034240  
H 1.075437 -1.404485 2.376695  
H -1.686135 -2.374600 2.227673  
H -1.735498 -0.883034 3.243972  
P -1.640511 0.275652 -0.603454  
C -3.136675 -0.780991 -0.713731  
C -3.603071 -1.336081 -1.917087  
C -4.737777 -2.153828 -1.921735

C -5.423342 -2.415299 -0.732039  
C -4.974101 -1.853226 0.467986  
C -3.835161 -1.045661 0.479146  
H -3.483112 -0.619261 1.420714  
H -5.508310 -2.049165 1.400858  
H -6.309576 -3.054549 -0.739878  
H -5.089306 -2.583756 -2.862861  
H -3.096248 -1.135518 -2.862383  
C -2.301680 1.990141 -0.657990  
C -3.681798 2.239972 -0.719913  
C -4.183236 3.543791 -0.695681  
C -3.298332 4.618152 -0.604376  
C -1.919276 4.399322 -0.545622  
C -1.415662 3.091883 -0.577042  
O -0.090422 2.802432 -0.548171  
C 0.857688 3.842458 -0.345084  
H 1.840029 3.583383 -0.287513  
H 0.665090 4.380853 0.597577  
H 0.856401 4.556926 -1.185753  
H -1.242447 5.250396 -0.479843  
H -3.677089 5.642856 -0.579677  
H -5.260697 3.713598 -0.745046  
H -4.380746 1.404805 -0.783323  
C 0.732880 -0.042053 -2.209832  
C 0.731818 0.417609 -2.221325  
P 1.646939 -0.084615 -0.673955  
C 3.136260 0.965431 -0.625812  
C 3.713079 1.225850 0.629400  
C 4.838407 2.047029 0.731832  
C 5.391565 2.622495 -0.416632  
C 4.821569 2.370251 -1.669074  
C 3.699801 1.543696 -1.777156  
H 3.268001 1.356431 -2.762650  
H 5.252960 2.818427 -2.567455  
H 6.267181 3.271236 -0.336078  
H 5.278235 2.245132 1.712227  
H 3.272218 0.796597 1.532212  
C 2.233559 -1.788032 -1.038983  
C 3.491105 -2.083237 -1.581156  
C 3.877622 -3.406233 -1.813316  
C 3.000029 -4.444446 -1.498452  
C 1.740478 -4.175710 -0.950054  
C 1.362390 -2.850248 -0.717524  
O 0.138624 -2.505365 -0.163359  
C -0.895585 -3.500541 -0.140178  
H -0.674178 -4.282832 0.602124  
H -1.820826 -2.986857 0.134905  
H -1.014616 -3.950122 -1.137805  
H 1.076917 -5.003709 -0.703764  
H 3.292083 -5.482735 -1.672811  
H 4.860869 -3.622498 -2.236270  
H 4.176712 -1.266893 -1.819531  
H 0.790842 1.511839 -2.269123  
H 1.243916 0.004242 -3.103579  
H -1.283636 0.422475 -3.042000  
H -0.784763 -1.133883 -2.346534

\*5B-05

Geometry with 79 atoms:

Total energy: -3195.957047090  
Cr -0.233158 -0.570031 0.887685  
C 0.029413 -2.484647 0.164102  
C 0.965614 -3.375928 0.991192  
C 0.448320 -3.740278 2.393013  
C 0.633559 -2.662839 3.471535  
C 0.115429 -1.262466 3.114089  
C -1.274830 -1.152073 2.535208  
H -1.891009 -0.355376 2.975207  
H -1.829732 -2.095494 2.469565  
H 0.281865 -0.569739 3.956631  
H 0.907956 -0.852880 2.371277  
H 1.706625 -2.582543 3.721281  
H 0.124610 -2.984423 4.395985  
H -0.617762 -4.016251 2.316995  
H 0.964246 -4.648570 2.746769  
H 1.134332 -4.320101 0.439240  
H 1.966329 -2.912307 1.075515  
H 0.400983 -2.424591 -0.874976  
H -0.977206 -2.937997 -0.114613  
P -1.900197 0.035607 -0.736066  
C -3.210155 -1.131496 -1.220565

|             |           |           |             |           |           |             |           |           |
|-------------|-----------|-----------|-------------|-----------|-----------|-------------|-----------|-----------|
| C -3.162822 | -1.825417 | -2.440385 | P -1.906384 | -0.017366 | -0.653130 | H 0.526032  | -2.401637 | -1.022771 |
| C -4.122045 | -2.801225 | -2.728672 | C -3.440801 | -0.968983 | -0.877529 | H -0.802448 | -3.047276 | -0.047968 |
| C -5.128875 | -3.092644 | -1.804952 | C -3.703059 | -1.720272 | -2.034269 | P 1.331616  | 0.381445  | -0.912742 |
| C -5.172645 | -2.411606 | -0.582846 | C -4.874790 | -2.479314 | -2.122984 | C 1.897310  | 2.133277  | -0.844438 |
| C -4.215153 | -1.441351 | -0.285427 | C -5.786219 | -2.493586 | -1.064497 | C 0.963477  | 3.157256  | -0.593464 |
| H -4.249690 | -0.921598 | 0.675259  | C -5.525130 | -1.749970 | 0.092808  | C 1.372553  | 4.491222  | -0.525920 |
| H -5.955164 | -2.639914 | 0.144754  | C -4.356110 | -0.995853 | 0.191184  | C 2.721715  | 4.822536  | -0.687228 |
| H -5.878254 | -3.853971 | -2.034308 | H -4.152833 | -0.423521 | 1.100454  | C 3.657280  | 3.811775  | -0.924109 |
| H -4.079636 | -3.334977 | -3.681102 | H -6.234246 | -1.761761 | 0.924063  | C 3.250380  | 2.476830  | -1.005688 |
| H -2.379718 | -1.618648 | -3.173324 | H -6.701019 | -3.086537 | -1.138300 | H 3.993797  | 1.702099  | -1.202258 |
| C -2.705600 | 1.483955  | 0.040852  | H -5.074381 | -3.060115 | -3.026741 | H 4.713448  | 4.061518  | -1.052928 |
| C -3.955304 | 1.980314  | -0.354450 | H -3.004029 | -1.723341 | -2.872806 | H 3.042401  | 5.865481  | -0.628656 |
| C -4.518407 | 3.087616  | 0.283988  | C -2.406786 | 1.704363  | -0.283872 | H 0.632361  | 5.273808  | -0.340671 |
| C -3.826436 | 3.703582  | 1.328802  | C -3.437096 | 2.350146  | -0.983242 | H -0.091217 | 2.925798  | -0.442542 |
| C -2.577086 | 3.228270  | 1.742441  | C -3.801244 | 3.661327  | -0.674768 | C 2.828310  | -0.593831 | -1.289692 |
| C -2.017029 | 2.121287  | 1.098101  | C -3.131442 | 4.333688  | 0.350338  | C 3.150552  | -1.071596 | -2.566932 |
| O -0.781853 | 1.605358  | 1.438035  | C -2.104064 | 3.712109  | 1.066696  | C 4.281614  | -1.866723 | -2.773140 |
| C 0.024402  | 2.271348  | 2.417167  | C -1.738110 | 2.398116  | 0.749162  | C 5.103119  | -2.185872 | -1.691061 |
| H 0.995613  | 1.760737  | 2.413779  | O -0.715354 | 1.736892  | 1.398924  | C 4.808810  | -1.717428 | -0.406720 |
| H -0.434681 | 2.200178  | 3.415755  | C -0.113161 | 2.339034  | 2.551935  | C 3.674577  | -0.921144 | -0.202757 |
| H 0.180652  | 3.324967  | 2.142808  | H -0.859758 | 2.487937  | 3.347564  | O 3.309915  | -0.414370 | 1.004447  |
| H -2.060780 | 3.721882  | 2.564646  | H 0.367483  | 3.293948  | 2.294407  | C 4.079643  | -0.714988 | 2.157988  |
| H -4.260367 | 4.566314  | 1.839780  | H 0.661304  | 1.644476  | 2.898296  | H 3.580584  | -0.221933 | 3.002762  |
| H -5.493683 | 3.464263  | -0.030926 | H -1.603452 | 4.259366  | 1.864184  | H 5.106184  | -0.319264 | 2.072133  |
| H -4.496146 | 1.483523  | -1.163466 | H -3.409574 | 5.358880  | 0.606076  | H 4.121648  | -1.800786 | 2.348153  |
| C -1.073259 | 0.685208  | -2.287420 | H -4.606134 | 4.152366  | -1.225312 | H 5.464701  | -1.976476 | 0.423773  |
| C 0.361782  | 0.158241  | -2.460774 | H -3.967273 | 1.807860  | -1.770782 | H 5.989563  | -2.807066 | -1.840674 |
| P 1.368432  | 0.326514  | -0.893787 | C -1.046022 | 0.056862  | -2.298963 | H 4.517186  | -2.232282 | -3.774643 |
| C 1.975941  | 2.064253  | -0.904283 | C 0.220976  | 0.918038  | -2.206548 | H 2.517063  | -0.823975 | -3.420289 |
| C 1.059846  | 3.114642  | -0.705242 | P 1.353862  | 0.426275  | -0.802313 | C 0.272578  | 0.274946  | -2.447546 |
| C 1.492711  | 4.442595  | -0.692962 | C 2.388013  | 1.930498  | -0.569220 | C -1.168036 | 0.757378  | -2.208942 |
| C 2.849293  | 4.740729  | -0.857672 | C 1.750259  | 3.148248  | -0.266404 | P -1.934421 | -0.004859 | -0.672662 |
| C 3.767694  | 3.703373  | -1.042107 | C 2.498191  | 4.305378  | -0.038247 | C -3.307704 | -1.082905 | -1.198556 |
| C 3.336601  | 2.373677  | -1.068580 | C 3.894916  | 4.261706  | -0.097398 | C -3.647787 | -2.153645 | -0.353078 |
| H 4.066239  | 1.576276  | -1.222410 | C 4.535612  | 3.056354  | -0.396949 | C -4.716559 | -2.991869 | -0.677847 |
| H 4.829365  | 3.928133  | -1.171746 | C 3.790293  | 1.897314  | -0.633518 | C -5.449551 | -2.772353 | -1.848314 |
| H 3.189414  | 5.779005  | -0.841409 | H 4.309681  | 0.969992  | -0.878506 | C -5.114644 | -1.710187 | -2.694337 |
| H 0.766334  | 5.246358  | -0.547770 | H 5.626179  | 3.015564  | -0.455043 | C -4.048623 | -0.865689 | -2.373277 |
| H 0.001727  | 2.902665  | -0.550650 | H 4.480981  | 5.166200  | 0.083491  | H -3.807889 | -0.036274 | -3.042510 |
| C 2.849515  | -0.705751 | -1.162423 | H 1.986042  | 5.245104  | 0.184096  | H -5.686576 | -1.535627 | -3.608860 |
| C 3.208701  | -1.252096 | -2.402189 | H 0.661275  | 3.205214  | -0.218777 | H -6.282904 | -3.431418 | -2.103732 |
| C 4.322075  | -2.088540 | -2.523607 | C 2.463697  | -0.866370 | -1.465376 | H -4.973505 | -3.822863 | -0.016675 |
| C 5.087992  | -2.380746 | -1.394026 | C 2.415084  | -1.345401 | -2.780639 | H -3.072644 | -2.327254 | 0.558582  |
| C 4.757160  | -1.842968 | -0.146255 | C 3.227044  | -2.408076 | -3.189282 | C -2.700354 | 1.395431  | 0.236364  |
| C 3.641852  | -1.003687 | -0.026897 | C 4.100219  | -2.997994 | -2.274274 | C -3.979550 | 1.892934  | -0.044342 |
| O 3.247749  | -0.426537 | 1.138287  | C 4.170655  | -2.539332 | -0.954885 | C -4.513243 | 2.952590  | 0.693395  |
| C 3.958775  | -0.694951 | 2.336417  | C 3.350343  | -1.480251 | -0.547095 | C -3.765635 | 3.515538  | 1.729159  |
| H 5.001170  | -0.337797 | 2.275508  | O 3.339004  | -0.962693 | 0.707622  | C -2.490391 | 3.029668  | 2.038357  |
| H 3.442846  | -0.144178 | 3.134257  | C 4.213612  | -1.473150 | 1.701183  | C -1.961415 | 1.972328  | 1.292943  |
| H 3.954457  | -1.770641 | 2.580451  | H 5.270740  | -1.330321 | 1.418378  | O -0.707979 | 1.443292  | 1.535231  |
| H 5.369212  | -2.082551 | 0.722816  | H 4.009044  | -0.900056 | 2.615483  | C 0.150046  | 2.066501  | 2.498417  |
| H 5.959082  | -3.035260 | -1.476925 | H 4.029638  | -2.543144 | 1.897630  | H 0.278496  | 3.134814  | 2.271677  |
| H 4.587392  | -2.507386 | -3.496426 | H 4.859790  | -3.012293 | -0.255404 | H -0.247624 | 1.937192  | 3.517055  |
| H 2.618940  | -1.025935 | -3.292542 | H 4.740022  | -3.827837 | -2.584226 | H 1.124190  | 1.570336  | 2.410676  |
| H 0.858414  | 0.675056  | -3.296302 | H 3.177044  | -2.769058 | -4.218535 | H -1.930781 | 3.472964  | 2.860914  |
| H 0.347104  | -0.918700 | -2.691867 | H 1.737071  | -0.891402 | -3.505496 | H -4.176310 | 4.339739  | 2.317043  |
| H -1.079809 | 1.780919  | -2.196253 | H -0.055245 | 1.963549  | -2.001163 | H -5.511656 | 3.330389  | 0.464017  |
| H -1.688334 | 0.449629  | -3.168763 | H 0.766082  | 0.928926  | -3.162329 | H -4.569451 | 1.435724  | -0.842004 |

#### <sup>45</sup>B-06

Geometry with 79 atoms:

Total energy: -3195.959050310  
 Cr -0.257772 -0.525543 1.006769  
 C -0.116569 -2.467118 0.319796  
 C 0.778134 -3.408987 1.135232  
 C 0.281394 -3.708847 2.558561  
 C 0.584819 -2.626146 3.603422  
 C 0.148935 -1.200536 3.236264  
 C -1.252433 -1.006490 2.709105  
 H -1.795005 -0.162492 3.159107  
 H -1.873239 -1.909857 2.683779  
 H 0.392738 -0.508012 4.059588  
 H 0.934786 -0.856111 2.453892  
 H 1.670312 -2.615318 3.808587  
 H 0.092922 -2.892143 4.554417  
 H -0.804373 -3.904781 2.523165  
 H 0.739786 -4.646183 2.915953  
 H 0.861388 -4.371158 0.594876  
 H 1.808866 -3.014937 1.180148  
 H 0.248081 -2.421845 -0.722691  
 H -1.144777 -2.871202 0.286514

#### <sup>45</sup>B-07

Geometry with 79 atoms:

Total energy: -3195.957233990  
 Cr -0.178855 -0.686444 0.853239  
 C 0.177992 -2.541839 0.016556  
 C 1.173718 -3.434269 0.769708  
 C 0.715456 -3.892795 2.163841  
 C 0.894182 -2.864862 3.290290  
 C 0.308728 -1.471898 3.019874  
 C -1.112718 -1.394162 2.516840  
 H -1.738126 -0.644878 3.022541  
 H -1.629367 -2.358926 2.448373  
 H 0.491950 -0.807365 3.881182  
 H 1.046985 -1.005806 2.256912  
 H 1.971234 -2.752445 3.507658  
 H 0.431736 -3.252375 4.213895  
 H -0.340765 -4.208344 2.104578  
 H 1.276962 -4.796653 2.453695  
 H 1.363954 -4.339982 0.163207  
 H 2.156630 -2.934447 0.850108

#### <sup>45</sup>B-08

Geometry with 79 atoms:

Total energy: -3195.957222610  
 Cr -0.171147 -0.693424 0.851865  
 C 0.188041 -2.548196 0.051504  
 C 1.188697 -3.436297 0.767266  
 C 0.735469 -3.894080 2.163428  
 C 0.914884 -2.864283 3.288143  
 C 0.324367 -1.473399 3.018027  
 C -1.098855 -1.400536 2.519154  
 H -1.724737 -0.652019 3.025377  
 H -1.612749 -2.367002 2.454303  
 H 0.508427 -0.806965 3.877694  
 H 1.059129 -1.006506 2.252247  
 H 1.992318 -2.748495 3.501747  
 H 0.456786 -3.252130 4.213791  
 H -0.320165 -4.212199 2.107627  
 H 1.299878 -4.796251 2.452886

|             |           |           |             |           |           |             |           |           |
|-------------|-----------|-----------|-------------|-----------|-----------|-------------|-----------|-----------|
| H 1.380369  | -4.342362 | 0.161739  | H 0.245032  | -4.392350 | -1.852578 | H 0.869954  | -1.558242 | 5.646149  |
| H 2.170116  | -2.933083 | 0.844703  | H -1.382590 | -4.988889 | -2.135493 | H 1.322919  | -0.124584 | 4.735598  |
| H 0.533401  | -2.407519 | -1.025144 | H -1.423658 | -4.429188 | 0.130806  | H -1.049367 | -0.002077 | 5.277066  |
| H -0.790647 | -3.057402 | -0.046863 | H -2.210700 | -3.040423 | -0.597754 | H -1.340424 | -1.651988 | 4.719027  |
| P -1.931453 | -0.018230 | -0.671412 | H -0.531327 | -2.447112 | 1.213645  | H -2.260768 | 0.002163  | 3.133268  |
| C -3.305447 | -1.099373 | -1.188327 | H 0.766973  | -3.159754 | 0.241845  | H -1.129249 | -1.099893 | 2.433750  |
| C -4.051313 | -0.887403 | -2.360880 | P 1.938640  | -0.080921 | 0.660113  | H -1.012197 | 1.789567  | 2.199922  |
| C -5.118239 | -1.733788 | -2.673815 | C 3.440534  | -1.048375 | 1.029917  | H 0.437455  | 1.328220  | 3.184696  |
| C -5.449152 | -2.792408 | -1.821805 | C 4.292682  | -0.752764 | 2.109077  | P 1.602488  | 0.159463  | -0.730900 |
| C -4.711269 | -3.006582 | -0.653476 | C 5.445827  | -1.513006 | 2.318948  | C 3.144249  | 1.126981  | -0.636124 |
| C -3.641572 | -2.166517 | -0.336731 | C 5.757105  | -2.570298 | 1.457588  | C 3.337726  | 2.309595  | -1.369999 |
| H -3.062771 | -2.335794 | 0.573432  | C 4.913288  | -2.868134 | 0.383431  | C 4.516913  | 3.045700  | -1.216244 |
| H -4.965143 | -3.834765 | 0.012392  | C 3.757988  | -2.112650 | 0.168637  | C 5.509167  | 2.610543  | -0.334082 |
| H -6.283394 | -3.452803 | -2.070820 | H 3.096859  | -2.348027 | -0.667382 | C 5.322053  | 1.432805  | 0.398551  |
| H -5.694187 | -1.563469 | -3.586606 | H 5.151218  | -3.696170 | -0.288509 | C 4.146448  | 0.695290  | 0.253722  |
| H -3.813779 | -0.060780 | -3.034604 | H 6.658538  | -3.164347 | 1.626713  | H 4.009551  | -0.222117 | 0.829364  |
| C -2.696388 | 1.385230  | 0.233508  | H 6.103750  | -1.277511 | 3.158964  | H 6.095190  | 1.086518  | 1.088597  |
| C -3.975642 | 1.881756  | -0.048508 | H 4.069478  | 0.071283  | 2.790982  | H 6.429826  | 3.187356  | -0.217559 |
| C -4.508428 | 2.945123  | 0.684422  | C 2.507897  | 1.408220  | -0.263871 | H 4.659564  | 3.962228  | -1.793858 |
| C -3.759846 | 3.512710  | 1.716997  | C 3.724461  | 2.051247  | 0.005762  | H 2.577858  | 2.670761  | -2.064937 |
| C -2.484800 | 3.027457  | 2.027839  | C 4.118836  | 3.178237  | -0.718211 | C 2.098476  | -1.529913 | -1.258900 |
| C -1.956710 | 1.966331  | 1.287122  | C 3.292356  | 3.667603  | -1.731787 | C 3.253572  | -1.784590 | -2.010371 |
| O -0.704102 | 1.437338  | 1.532147  | C 2.078839  | 3.040477  | -0.209433 | C 3.590289  | -3.086567 | -2.388428 |
| C 0.159458  | 2.072462  | 2.482786  | C 1.689711  | 1.913439  | -1.298883 | C 2.764880  | -4.146741 | -2.010520 |
| H 1.134299  | 1.578267  | 2.392709  | O 0.501901  | 1.254044  | -1.538465 | C 1.606257  | -3.919971 | -1.259986 |
| H -0.230241 | 1.951803  | 3.505583  | C -0.478919 | 1.834424  | -2.409417 | C 1.274054  | -2.613990 | -0.888695 |
| H 0.283022  | 3.138688  | 2.244162  | H -1.393425 | 1.242813  | -2.276918 | O 0.144773  | -2.312329 | -0.148886 |
| H -1.924358 | 3.474011  | 2.848044  | H -0.145354 | 1.784123  | -3.457585 | C -0.762414 | -3.367680 | 0.199682  |
| H -4.169817 | 4.339864  | 2.301224  | H -0.688165 | 2.873788  | -2.118583 | H -1.607937 | -2.893919 | 0.710577  |
| H -5.506802 | 3.322251  | 0.453765  | H 1.452445  | 3.432833  | -2.829653 | H -0.278966 | -4.093654 | 0.871501  |
| H -4.566275 | 1.420877  | -0.843626 | H 3.592256  | 4.545303  | -2.309210 | H -1.135890 | -3.872297 | -0.704258 |
| C -1.170781 | 0.740569  | -2.213137 | H 5.069602  | 3.666757  | -0.495561 | H 0.982771  | -4.764241 | -0.969236 |
| C 0.273156  | 0.268557  | -2.450620 | H 4.377525  | 1.657612  | 0.787760  | H 3.020677  | -5.170343 | -2.294169 |
| P 1.331246  | 0.380356  | -0.915873 | C 1.278772  | 0.562900  | 2.302810  | H 4.495643  | -3.270876 | -2.970336 |
| C 1.868808  | 2.140116  | -0.835378 | C -0.216854 | 0.262532  | 2.531433  | H 3.903403  | -0.952332 | -2.291375 |
| C 3.221687  | 2.504632  | -0.940629 | P -1.268099 | 0.380891  | 0.997145  | C 0.651015  | 0.789820  | -2.198283 |
| C 3.603583  | 3.846119  | -0.844613 | C -1.696354 | 2.156891  | 0.787597  | C -0.736136 | 0.137819  | -2.162038 |
| C 2.643359  | 4.842295  | -0.648613 | C -3.017160 | 2.567128  | 0.537871  | P -1.647834 | 0.271711  | -0.639495 |
| C 1.294000  | 4.489849  | -0.542400 | C -3.304703 | 3.910031  | 0.276721  | C -3.096999 | -0.833777 | -0.820551 |
| C 0.909459  | 3.149585  | -0.624667 | C -2.282104 | 4.863113  | 0.263220  | C -3.832020 | -1.114020 | 0.347335  |
| H -0.146969 | 2.901736  | -0.517604 | C -0.965271 | 4.465323  | 0.516183  | C -4.921619 | -1.985431 | 0.310245  |
| H 0.534191  | 5.260603  | -0.389803 | C -0.673385 | 3.123608  | 0.771539  | C -5.283990 | -2.600781 | -0.893628 |
| H 2.944862  | 5.890300  | -0.579362 | H 0.364679  | 2.842028  | 0.946676  | C -4.560068 | -2.329681 | -2.057819 |
| H 4.660061  | 4.112455  | -0.930392 | H -0.156719 | 5.200582  | 0.511186  | C -3.474449 | -1.447180 | -2.026198 |
| H 3.985210  | 1.742242  | -1.105190 | H -2.510539 | 5.912366  | 0.060833  | H -2.933470 | -1.242785 | -2.952029 |
| C 2.839138  | -0.573610 | -1.301637 | H -4.338056 | 4.212194  | 0.088672  | H -4.843360 | -2.803076 | -3.001204 |
| C 3.167868  | -1.028349 | -2.585819 | H -3.831526 | 1.841168  | 0.553021  | H -6.131840 | -3.289477 | -0.923300 |
| C 4.305768  | -1.810600 | -2.802463 | C -2.835241 | -0.459811 | 1.402640  | H -5.486157 | -2.189557 | -1.223408 |
| C 5.127839  | -2.140091 | -1.723880 | C -3.220982 | -0.810987 | 2.703378  | H -3.549916 | -0.642917 | 1.293147  |
| C 4.827413  | -1.694207 | -0.433054 | C -4.403515 | -1.518975 | 2.934555  | C -2.349432 | 1.969152  | -0.626821 |
| C 3.686490  | -0.910291 | -0.218572 | C -5.212049 | -1.876874 | 1.854736  | C -3.696129 | 2.233156  | -0.917723 |
| O 3.317395  | -0.424022 | 0.995706  | C -4.854838 | -1.532063 | 0.547329  | C -4.207736 | 3.531241  | -0.839663 |
| C 4.091207  | -0.732650 | 2.144585  | C -3.668616 | -0.823904 | 0.317728  | C -3.367673 | 4.580729  | -0.462273 |
| H 4.140692  | -1.820263 | 2.322023  | O -3.245442 | -0.431916 | -0.916483 | C -2.020817 | 4.346153  | -0.169497 |
| H 5.114974  | -0.329209 | 2.061513  | C -4.018860 | -0.759901 | -2.061288 | C -1.506665 | 3.045585  | -0.257635 |
| H 3.590184  | -0.252506 | 2.995582  | H -4.138446 | -1.850383 | -2.172627 | O -0.205002 | 2.734861  | -0.021416 |
| H 5.483848  | -1.960640 | 0.394580  | H -5.014071 | -0.284954 | -2.023832 | C 0.636686  | 3.642549  | 0.675988  |
| H 6.019602  | -2.751632 | -1.881510 | H -3.472364 | -0.367951 | -2.929175 | H 1.542962  | 3.082627  | 0.938670  |
| H 4.546188  | -2.158185 | -3.809199 | H -5.503133 | -1.818159 | -0.280103 | H 0.915722  | 4.502035  | 0.042876  |
| H 2.534048  | -0.772634 | -3.436536 | H -6.138903 | -2.430234 | 2.024436  | H 0.156418  | 4.006578  | 1.599050  |
| H 0.727522  | 0.836772  | -3.277005 | H -4.690283 | -1.785650 | 3.953807  | H -1.376666 | 5.178184  | 0.115620  |
| H 0.272615  | -0.795794 | -2.733304 | H -2.597596 | -0.530178 | 3.554477  | H -3.758073 | 5.599190  | -0.395028 |
| H -1.220907 | 1.832195  | -2.095805 | H -0.613353 | 0.907232  | 3.330585  | H -5.258906 | 3.718203  | -1.069085 |
| H -1.787993 | 0.491328  | -3.088201 | H -0.331662 | -0.782588 | 2.857993  | H -4.357347 | 1.410816  | -1.198896 |

45B-09  
Geometry with 79 atoms:  
Total energy: -3195.956866690  
Cr 0.134687 -0.836409 -0.758184  
C -0.207813 -2.642760 0.174702  
C -1.233231 -3.552521 -0.516881  
C -0.811303 -4.075339 -1.900249  
C -1.013564 -3.099684 -3.068748  
C -0.415440 -1.698742 -2.880871  
C 1.019813 -1.605789 -2.421322  
H 1.629384 -0.875822 -2.972249  
H 1.535395 -2.569818 -2.334576  
H -0.617464 -1.074803 -3.767982  
H -1.126694 -1.187656 -2.122986  
H -2.095238 -2.992341 -3.264457  
H -0.576723 -3.533599 -3.984115

45B-10  
Geometry with 79 atoms:  
Total energy: -3195.956630030  
Cr 0.121650 -0.404713 1.168048  
C -0.391936 0.963175 2.566105  
C -1.174725 -0.187997 3.146236  
C -0.751641 -0.740373 4.513113  
C 0.740720 -1.060300 4.670793  
C 1.341489 -1.937306 3.561295  
C 1.699078 -1.189462 2.268162  
H 2.234876 -1.876020 1.587231  
H 2.392166 -0.361464 2.502198  
H 2.255206 -2.414593 3.964340  
H 0.652586 -2.779500 3.347499

45B-11  
Geometry with 79 atoms:  
Total energy: -3195.953351470  
Cr -0.472525 -0.065310 1.330290  
C 0.056273 0.422026 3.240449  
C -1.423864 0.669972 3.354391  
C -2.255422 -0.232042 4.275508  
C -2.059780 -1.742215 4.077667  
C -2.172971 -2.241517 2.626967  
C -0.917230 -2.020530 1.775578  
H -1.001429 -2.555727 0.812429  
H -0.039436 -2.426578 2.307974

H -2.387331 -3.326629 2.659948  
H -3.061177 -1.792078 2.142172  
H -2.810314 -2.255976 4.700802  
H -1.079033 -2.050630 4.480267  
H -2.014530 0.034072 5.318646  
H -3.322102 0.015482 4.130946  
H -1.656799 1.731893 3.538621  
H -1.945742 0.548118 2.319494  
H 0.682241 1.312359 3.823257  
H 0.437162 -0.421147 3.830008  
P 1.539004 -0.259896 -0.170216  
C 2.757868 1.060674 0.204044  
C 3.294975 1.078514 1.502703  
C 4.194273 2.077451 1.882529  
C 4.558948 3.074742 0.971772  
C 4.031270 3.059518 -0.323312  
C 3.138952 2.054971 -0.710233  
H 2.755166 2.051965 -1.731494  
H 4.321079 3.803633 -1.041603  
H 5.256625 3.861076 1.270030  
H 4.606028 2.079945 2.894708  
H 3.001309 0.312459 2.225504  
C 2.525766 -1.786425 -0.372568  
C 2.243995 -2.919636 0.403514  
C 3.013676 -4.080683 0.293026  
C 4.085417 -4.107643 -0.600075  
C 4.391631 -2.992062 -1.385648  
C 3.614897 -1.829581 -1.282654  
O 3.834217 -0.712049 -2.012334  
C 4.988556 -0.609110 -2.831552  
H 4.980536 0.407280 -3.246995  
H 4.965994 -1.337180 -3.660779  
H 5.912485 -0.749590 -2.245231  
H 5.233437 -3.035905 -2.076343  
H 4.699058 -5.007229 -0.693171  
H 2.777466 -4.953212 0.905422  
H 1.412737 -2.892663 1.106204  
C 0.856741 0.128025 -1.863371  
C -0.470192 -0.597173 -2.125174  
P -1.725115 -0.108330 -0.844619  
C -3.261548 -1.012643 -1.218095  
C -4.376095 -0.778211 -0.390760  
C -5.569750 -1.467327 -0.604752  
C -5.659985 -2.410125 -1.635736  
C -4.554544 -2.655199 -2.453759  
C -3.357955 -1.958946 -2.251048  
H -2.509777 -2.163109 -2.906888  
H -4.620499 -3.390671 -3.259265  
H -6.593275 -2.954378 -1.799096  
H -6.431099 -1.273285 0.038860  
H -4.312361 -0.048979 0.421768  
C -2.067557 1.656636 -1.202116  
C -2.986579 2.064596 -2.179681  
C -3.233188 3.418309 -2.414566  
C -2.554956 4.376525 -1.659435  
C -1.635218 3.996848 -0.676390  
C -1.389002 2.637987 -0.445605  
O -0.487211 2.199320 0.510398  
C 0.314327 3.184158 1.183541  
H 1.041400 2.635394 1.786736  
H 0.856382 3.803088 0.454248  
H -0.310518 3.817134 1.832856  
H -1.129285 4.768190 -0.098347  
H -2.741165 5.440087 -1.827066  
H -3.952284 3.721285 -3.178258  
H -3.522110 1.306137 -2.756104  
H -0.341145 -1.690141 -2.055344  
H -0.844435 -0.364354 -3.134617  
H 1.606953 -0.131713 -2.621835  
H 0.705647 1.217838 -1.907449

<sup>45</sup>B-12

Geometry with 79 atoms:

Total energy: -3195.952807900  
Cr -0.491603 -0.375994 1.261093  
C -0.010629 -0.410582 3.247204  
C -1.485475 -0.140926 3.377135  
C -2.385131 -1.208068 4.014279  
C -2.246292 -2.624216 3.436489  
C -2.316214 -2.725820 1.902778  
C -1.009359 -2.372031 1.182751

H -1.059863 -2.671790 0.120339  
H -0.180089 -2.939296 1.639280  
H -2.586719 -3.767708 1.646573  
H -3.154802 -2.112762 1.519864  
H -3.044723 -3.240702 3.881348  
H -1.298071 -3.077082 3.775505  
H -2.171677 -1.231443 5.096303  
H -3.434461 -0.879262 3.911877  
H -1.691724 0.849663 3.815707  
H -1.971703 0.019086 2.329335  
H 0.636653 0.385804 3.638271  
H 0.321132 -1.392743 3.606293  
P 1.522968 -0.270850 -0.227403  
C 2.662930 1.043671 0.360776  
C 3.209916 0.872743 1.644593  
C 4.047981 1.846801 2.191232  
C 4.341032 3.006611 1.465311  
C 3.803931 3.179379 0.185854  
C 2.973040 2.200682 -0.368869  
H 2.580314 2.346137 -1.376177  
H 4.038947 4.078105 -0.390072  
H 4.991642 3.772497 1.894581  
H 4.468761 1.702502 3.189372  
H 2.971459 -0.023469 2.224438  
C 2.600164 -1.705659 -0.572122  
C 2.394670 -2.919440 0.098019  
C 3.232771 -4.015610 -0.122650  
C 4.293930 -3.893979 -1.020760  
C 4.528466 -2.692265 -1.696850  
C 3.687130 -1.592524 -1.478089  
O 3.838593 -0.393214 -2.084653  
C 4.968844 -0.142213 -2.905523  
H 5.911103 -0.289027 -2.350625  
H 4.895630 0.909136 -3.214081  
H 4.968889 -0.781975 -3.804881  
H 5.366332 -2.620724 -2.390207  
H 4.957827 -4.742837 -1.202899  
H 3.057248 -4.954247 0.406743  
H 1.570282 -3.003703 0.805316  
C 0.857228 0.297959 -1.879917  
C -0.501472 -0.336574 -2.204865  
P -1.716286 0.060631 -0.858543  
C -3.321652 -0.651590 -1.338901  
C -4.447873 -0.320119 -0.562178  
C -5.687155 -0.897887 -0.836853  
C -5.814262 -1.823009 -1.880164  
C -4.699042 -2.161412 -2.649888  
C -3.454856 -1.578735 -2.384744  
H -2.597101 -1.857514 -2.999659  
H -4.793538 -2.882717 -3.465263  
H -6.784044 -2.80281 -2.090706  
H -6.556862 -0.630108 -0.231915  
H -4.355749 0.395889 0.259636  
C -1.904725 1.878517 -0.942673  
C -2.680957 2.508806 -1.926387  
C -2.803324 3.898299 -1.963959  
C -2.141334 4.666509 -1.004025  
C -1.361885 4.063304 -0.012093  
C -1.240465 2.668047 0.022402  
O -0.482250 2.013369 0.977680  
C 0.257710 2.810770 1.917545  
H 0.841135 2.114016 2.524329  
H 0.949464 3.485959 1.393366  
H -0.427467 3.382447 2.562636  
H -0.864152 4.690630 0.725008  
H -2.230817 5.755392 -1.016384  
H -3.413115 4.376546 -2.733150  
H -3.204094 1.895294 -2.664544  
H -0.420438 -1.434528 -2.259935  
H -0.874461 0.023068 -3.177130  
H 1.597844 0.078794 -2.659757  
H 0.752641 1.392586 -1.829143

<sup>45</sup>B-13

Geometry with 79 atoms:

Total energy: -3195.953408880  
Cr -0.008376 0.133680 1.055624  
C -1.550398 0.307954 2.423130  
C -1.731625 1.690700 3.064730  
C -0.899129 1.953507 4.326195  
C 0.630331 1.961056 4.190907

C 1.304759 0.609912 3.872000  
C 1.570223 0.326914 2.389995  
H 2.080964 -0.651159 2.292644  
H 2.288155 1.073287 2.000651  
H 2.272484 0.576426 4.409628  
H 0.705480 -0.205659 4.315029  
H 1.034508 2.334661 5.147244  
H 0.931840 2.709057 3.434986  
H -1.208936 2.929629 4.740666  
H -1.176503 1.203986 5.091031  
H -1.538270 2.494095 2.328343  
H -2.794058 1.825639 3.345565  
H -1.368944 -0.453116 3.203581  
H -2.482114 0.011085 1.908578  
P -1.562193 -0.240959 -0.932382  
C -3.172692 -1.095969 -0.869580  
C -3.309053 -2.419654 -1.326126  
C -4.515896 -3.104050 -1.154757  
C -5.596279 -2.480612 -0.523827  
C -5.466837 -1.166052 -0.063577  
C -4.264025 -0.476766 -0.230747  
H -4.178638 0.550808 0.129476  
H -6.307545 -0.671537 0.428977  
H -6.538800 -0.0717372 -0.392264  
H -4.611339 -4.129176 -1.521129  
H -2.479613 -2.928362 -1.821824  
C -1.928876 1.504628 -1.336894  
C -2.920752 1.868150 -2.262577  
C -3.210943 3.207496 -2.520196  
C -2.507338 4.202118 -1.836697  
C -1.514097 3.869166 -0.912265  
C -1.219546 2.523174 -0.664837  
O -0.220548 2.157881 0.232505  
C 0.777977 3.149058 0.555995  
H 1.162206 3.606530 -0.367435  
H 1.585636 2.622449 1.068852  
H 0.359452 3.916122 1.225207  
H -0.987374 4.663994 -0.386879  
H -2.731601 5.256186 -2.016533  
H -3.985704 3.473172 -3.242189  
H -3.481820 1.082409 -2.774792  
C -0.662791 -0.926267 -2.412233  
C 0.730019 -0.297001 -2.530284  
P 1.598696 -0.289172 -0.883105  
C 3.207877 0.525922 -1.161183  
C 4.192592 0.419356 -0.159133  
C 5.404190 1.099551 -0.286750  
C 5.648084 1.900501 -1.408260  
C 4.674816 2.014122 -2.404201  
C 3.459243 1.332011 -2.285327  
H 2.719789 1.433659 -3.081725  
H 4.861835 2.632435 -3.285616  
H 6.597370 2.432622 -1.506120  
H 6.161711 1.004166 0.495046  
H 4.013306 -0.202477 0.720257  
C 1.989771 -2.039610 -0.498531  
C 3.059356 -2.719635 -1.102868  
C 3.381986 -4.027007 -0.738537  
C 2.637460 -4.664083 0.256707  
C 1.568184 -4.011411 0.875956  
C 1.237292 -2.707380 0.492532  
O 0.162608 -2.038364 1.068892  
C -0.880310 -2.824979 1.684763  
H -1.091871 -3.711233 1.070049  
H -0.585831 -3.121801 2.701952  
H -1.773437 -2.195290 1.726799  
H 1.011546 -4.521775 1.660632  
H 2.889774 -5.681038 0.566052  
H 4.216381 -4.540749 -1.220330  
H 3.655711 -2.206271 -1.861274  
H 0.636365 0.759550 -2.831050  
H 1.336471 -0.810746 -3.292466  
H -1.249319 -0.772860 -3.331483  
H -0.573710 -2.012753 -2.250951

<sup>45</sup>B-14

Geometry with 79 atoms:

Total energy: -3195.954351160  
Cr -0.031860 -0.729345 0.904145  
C 1.659796 -1.157695 2.016860  
C 2.141742 -2.613754 2.053052

C 1.468910 -3.523977 3.087759  
C -0.032006 -3.806995 2.927747  
C -0.989371 -2.634818 3.225442  
C -1.414544 -1.788551 2.022706  
H -2.123926 -1.004333 2.352664  
H -1.988230 -2.422685 1.321547  
H -1.901453 -3.047738 3.698678  
H -0.531836 -1.999820 4.006526  
H -0.278232 -4.637277 3.611274  
H -0.230106 -4.195807 1.911304  
H 1.999741 -4.492753 3.078123  
H 1.639312 -3.103166 4.096787  
H 2.052644 -3.085149 1.057520  
H 3.227938 -2.628988 2.268528  
H 1.481218 -0.799121 3.046044  
H 2.459576 -0.510830 1.613922  
P 1.364723 0.562017 -0.877717  
C 2.712382 1.743244 -0.519682  
C 2.493044 3.130278 -0.609447  
C 3.482895 4.030626 -0.206923  
C 4.699794 3.563034 0.297023  
C 4.922484 2.186409 0.399629  
C 3.937718 1.281015 -0.001264  
H 4.131548 0.210106 0.083708  
H 5.870108 1.811184 0.793597  
H 5.472644 4.269177 0.609839  
H 3.298738 5.104630 -0.289642  
H 1.549684 3.526724 -0.989400  
C 2.145468 -0.921236 -1.624139  
C 3.305604 -0.874567 -2.413511  
C 3.872098 -2.041728 -2.927895  
C 3.279972 -3.276667 -2.651587  
C 2.119613 -3.349705 -1.876876  
C 1.554032 -2.174466 -1.375884  
O 0.381442 -2.207864 -0.621478  
C -0.581468 -3.233344 -0.947541  
H -0.336464 -4.172378 -0.431718  
H -0.600195 -3.388481 -2.035853  
H -1.559481 -2.875980 -0.610252  
H 1.671271 -4.318626 -1.658253  
H 3.723627 -4.197692 -3.036482  
H 4.775878 -1.987334 -3.538326  
H 3.774516 0.090471 -2.618191  
C 0.355586 1.296901 -2.264952  
C -1.011188 0.607525 -2.378239  
P -1.759904 0.326095 -0.689207  
C -3.517753 -0.061181 -0.993308  
C -4.497626 0.339480 -0.067779  
C -5.829741 -0.040416 -0.245372  
C -6.198258 -0.827227 -1.341539  
C -5.227655 -1.235554 -2.261320  
C -3.892772 -0.859117 -2.089588  
H -3.150284 -1.191465 -2.818934  
H -5.510077 -1.848898 -3.120619  
H -7.241397 -1.121897 -1.478769  
H -6.584173 0.282226 0.476291  
H -4.221545 0.956469 0.790882  
C -1.721040 2.004954 0.050612  
C -2.261781 3.121421 -0.608045  
C -2.128179 4.405202 -0.080365  
C -1.435574 4.582637 1.121198  
C -0.894535 3.489658 1.801254  
C -1.046306 2.201936 1.272479  
O -0.534606 1.092263 1.932494  
C -0.376243 1.178470 3.366177  
H -0.330573 0.153134 3.742180  
H 0.554532 1.707201 3.616358  
H -1.245066 1.689781 3.804449  
H -0.352067 3.650560 2.732035  
H -1.311353 5.583790 1.540574  
H -2.557351 5.262252 -0.603454  
H -2.796532 2.974566 -1.549956  
H -0.913357 -0.383811 -2.850028  
H -1.696581 1.198804 -3.005541  
H 0.914075 1.238846 -3.211738  
H 0.210312 2.360946 -2.029489

<sup>45</sup>B-15

Geometry with 79 atoms:  
Total energy: -3195.953252820  
Cr -0.480643 -1.154395 0.858184

C 0.172040 -2.211311 2.475442  
C -1.312119 -2.357186 2.713996  
C -1.925096 -3.759386 2.595354  
C -1.563621 -4.537870 1.322792  
C -1.784385 -3.783724 0.001602  
C -0.668224 -2.803594 -0.382038  
H -0.836828 -2.436772 -1.410273  
H 0.303953 -3.327063 -0.391849  
H -1.877532 -4.537127 -0.803949  
H -2.764802 -3.269445 0.025683  
H -2.166383 -5.461056 1.320749  
H -0.512107 -4.871446 1.368199  
H -1.611710 -4.340618 3.479091  
H -3.023257 -3.664059 2.659281  
H -1.642534 -1.876459 3.650029  
H -1.922073 -1.721455 1.956189  
H 0.714907 -1.649029 3.248432  
H 0.691750 -3.152182 2.258644  
P 1.409314 -0.281825 -0.440531  
C 1.914987 -1.377697 0.152475  
C 1.760145 2.551434 -0.598682  
C 2.130303 3.785901 -0.056859  
C 2.663829 3.857845 1.232974  
C 2.823707 2.689161 1.985987  
C 2.444867 1.456089 1.451570  
H 2.568037 0.545759 2.045303  
H 3.245367 2.738325 2.993215  
H 2.955128 4.823902 1.652369  
H 2.000221 4.695599 -0.647768  
H 1.356544 2.516384 -1.611438  
C 2.957378 -1.237068 -0.572779  
C 3.099248 -2.436004 0.140111  
C 4.290588 -3.164171 0.091784  
C 5.353817 -2.682741 -0.674065  
C 5.240010 -1.487797 -1.391758  
C 4.042232 -0.759670 -1.350991  
O 3.838246 0.399401 -2.015990  
C 4.907355 1.021359 -2.711483  
H 5.262413 0.400458 -3.552102  
H 5.752090 1.243278 -2.037128  
H 4.508009 1.965244 -3.105975  
H 6.084699 -1.132379 -1.981413  
H 6.292846 -3.240270 -0.718409  
H 4.386369 -4.096514 0.651824  
H 2.265802 -2.792493 0.746337  
C 0.765709 -0.100564 -2.174861  
C -0.657591 0.483847 -2.300507  
P -1.701962 0.315117 -0.749860  
C -3.418598 0.059266 -1.326970  
C -3.678779 -1.045165 -2.160973  
C -4.984940 -1.335092 -2.558725  
C -6.046806 -0.535809 -2.121087  
C -5.796292 0.552092 -1.280535  
C -4.489944 0.850385 -0.880517  
H -4.311647 1.702351 -0.221714  
H -6.622039 1.177603 -0.932435  
H -7.068885 -0.763686 -2.432963  
H -5.174421 -2.191664 -3.210134  
H -2.861976 -1.688907 -2.498663  
C -1.627885 1.971709 0.019159  
C -1.985727 3.133948 -0.683065  
C -1.864958 4.395106 -0.101733  
C -1.375018 4.496558 1.202383  
C -1.014696 3.357150 1.924463  
C -1.141327 -2.090495 1.338591  
O -0.789102 0.932411 2.007126  
C -0.460491 1.045825 3.399528  
H 0.460154 1.631717 3.537404  
H -1.293059 1.504913 3.954223  
H -0.295310 0.031469 3.771361  
H -0.622448 3.474266 2.932153  
H -1.264021 5.476767 1.672057  
H -2.148211 5.289603 -0.660231  
H -2.369689 3.043378 -1.702497  
H -1.196827 -0.016707 -3.117397  
H -0.628296 1.552449 -2.557199  
H 0.788693 -1.134603 -2.551594  
H 1.490772 0.469789 -2.770728

<sup>45</sup>B-16

Geometry with 79 atoms:

Total energy: -3195.952365370  
Cr 0.443825 1.246350 0.781867  
C -0.211778 2.422801 2.316299  
C 1.270210 2.591711 2.528789  
C 1.873625 3.986634 2.317971  
C 1.487785 4.682027 1.004626  
C 1.696808 3.846631 -0.268539  
C 0.602926 2.811847 -0.564888  
H 0.776825 2.376747 -1.565074  
H -0.383064 3.308148 -0.602052  
H 1.752240 4.546614 -1.123789  
H 2.691316 3.361151 -0.234323  
H 2.083006 5.607512 0.935367  
H 0.434614 5.010697 1.044949  
H 1.568660 4.617959 3.169619  
H 2.973494 3.902564 2.372085  
H 1.617191 2.163450 3.483670  
H 1.874957 1.919950 1.792779  
H -0.752311 1.927913 3.135397  
H -0.736059 3.338130 2.017093  
P -1.437760 0.230396 -0.446428  
C -1.900691 -1.401658 0.248535  
C -2.456409 -1.412770 1.538941  
C -2.796217 -2.620905 2.150783  
C -2.571699 -3.830998 1.484590  
C -2.013145 -3.825618 0.203598  
C -1.681186 -2.617023 -0.415557  
H -1.255074 -2.636231 -1.419386  
H -1.832162 -4.767412 -0.319856  
H -2.832458 -4.772520 1.964828  
H -3.237718 -2.618310 3.483670  
H -2.627110 -0.470050 2.066673  
C -3.006602 1.138472 -0.642495  
C -3.178956 2.377042 -0.008646  
C -4.381092 3.080128 -0.121783  
C -5.422913 2.533889 -0.873697  
C -5.279244 1.297217 -1.511148  
C -4.071806 0.592532 -1.402777  
O -3.838766 -0.604698 -1.985396  
C -4.882944 -1.286728 -2.661655  
H -5.742373 -1.472269 -1.995064  
H -4.463230 -2.250614 -2.978998  
H -5.222252 -0.731064 -3.552892  
H -6.107683 0.891812 -2.091924  
H -6.368861 3.072799 -0.970264  
H -4.501719 4.044181 0.376337  
H -2.360557 2.784833 0.586093  
C -0.790562 -0.041021 -2.166372  
C 0.651636 -0.585660 -2.265460  
P 1.695421 -0.291782 -0.737358  
C 3.412350 -0.089270 -1.333732  
C 4.285102 0.692934 -0.558178  
C 5.617151 0.860045 -0.945130  
C 6.087641 0.253539 -2.113646  
H 5.223593 -0.520700 -2.894952  
C 3.891729 -0.693371 -2.509657  
H 3.233390 -1.302622 -3.133497  
H 5.587779 -0.993908 -3.810112  
H 7.128171 0.387833 -2.419023  
H 6.286517 1.471949 -0.335721  
C 1.666609 -1.895782 0.153273  
C 2.118386 -3.083502 -0.441206  
C 2.066387 -4.299190 0.238986  
C 1.559116 -4.327679 1.539833  
C 1.114636 -3.158463 2.160239  
C 1.167700 -1.938751 1.472105  
O 0.736675 -0.754275 2.045508  
C 0.391027 -0.785026 2.843816  
H 0.146642 0.239262 3.730721  
H -0.488050 -1.423739 3.608245  
H 1.243649 -1.140297 4.037256  
H 0.720629 -3.217072 3.172421  
H 1.506829 -5.270829 2.088829  
H 2.421383 -5.214097 -0.239716  
H 2.525450 -3.051259 -1.454872  
H 1.167279 -0.091538 -3.101703  
H 0.655589 -1.664575 -2.478540  
H -0.843983 0.967341 -2.604846  
H -1.497899 -0.667486 -2.725371



<sup>4</sup>B-17

Geometry with 79 atoms:  
Total energy: -3195.952244800  
Cr -0.200279 -0.957635 0.600126  
C -0.648608 -2.457242 -0.763518  
C -1.072807 -3.780568 -0.118764  
C -2.573943 -3.924396 0.162988  
C -3.211686 -2.848376 1.055541  
C -2.408113 -2.522293 2.329912  
C -1.504357 -1.297618 2.180128  
H -0.858004 -1.175409 3.076284  
H -2.134498 -0.386098 2.154661  
H -3.110438 -2.362458 3.170220  
H -1.813493 -3.407260 2.624293  
H -4.226632 -3.189631 1.320955  
H -3.354572 -1.918576 0.480333  
H -3.114126 -3.951168 -0.801299  
H -2.738659 -4.912980 0.629006  
H -0.777429 -4.622801 -0.774007  
H -0.508400 -3.948618 0.816933  
H 0.293919 -2.610617 -1.320429  
H -1.401836 -2.148006 -1.511162  
P -1.439254 0.638321 -0.694651  
C -3.246570 0.524400 -0.916331  
C -3.779610 -0.324274 -1.903677  
C -5.157232 -0.540618 -1.976111  
C -6.015167 0.076672 -1.060518  
C -5.490347 0.913011 -0.070765  
C -4.113404 1.135587 0.006352  
H -3.716891 1.785628 0.789162  
H -6.155729 1.395147 0.649445  
H -7.092411 -0.097124 -1.116768  
H -5.560412 -1.200048 -2.748359  
H -3.125576 -0.835333 -2.614144  
C -1.096881 2.237182 0.125987  
C -1.613293 3.445812 -0.368736  
C -1.325806 4.660243 0.252655  
C -0.511820 4.668426 1.389073  
C 0.014581 3.481880 1.903437  
C -0.272419 2.263710 1.273391  
O 0.234693 1.066846 1.720468  
C 1.083723 1.048504 2.871310  
H 0.530474 1.357584 3.771691  
H 1.962015 1.693598 2.719989  
H 1.421219 0.012312 2.991883  
H 0.649547 3.518731 2.786856  
H -0.279475 5.611455 1.889665  
H -1.737031 5.591584 -0.141711  
H -2.259723 3.426125 -1.250382  
C -0.698547 0.810036 -2.418672  
C 0.692881 0.146534 -2.578856  
P 1.546552 0.003250 -0.940677  
C 2.515504 1.521968 -0.658032  
C 2.159693 2.739204 -1.263578  
C 2.827693 3.918606 -0.922510  
C 3.852937 3.898830 0.026789  
C 4.215154 2.689909 0.631701  
C 3.551280 1.508556 0.295269  
H 3.847071 0.571091 0.773626  
H 5.023962 2.665722 1.366424  
H 4.373887 4.822136 0.291351  
H 2.540881 4.857470 -1.402071  
H 1.357574 2.783674 -2.001519  
C 2.732930 -1.379306 -0.925571  
C 3.713175 -1.568370 -1.909394  
C 4.589658 -2.652706 -1.849731  
C 4.487328 -3.553485 -0.788144  
C 3.523576 -3.384010 0.211665  
C 2.645364 -2.297542 0.148211  
O 1.671214 -2.079049 1.120535  
C 1.686136 -2.902147 2.302088  
H 1.486635 -3.953737 2.050693  
H 2.654167 -2.808836 2.817356  
H 0.883118 -2.532039 2.948276  
H 3.470851 -4.108700 1.022502  
H 5.165507 -4.407965 -0.727645  
H 5.346534 -2.792358 -2.624201  
H 3.787238 -0.851380 -2.731351  
H 1.305183 0.677224 -3.323371  
H 0.576298 -0.891646 -2.922147  
H -0.660076 1.887490 -2.636055

H -1.406726 0.376386 -3.137658

<sup>4</sup>B-18

Geometry with 79 atoms:  
Total energy: -3195.950951480  
Cr -0.135998 -0.961338 0.569552  
C -0.440526 -2.493342 -0.794006  
C -0.073601 -3.908534 -0.324752  
C -0.492369 -4.308400 1.097875  
C -1.969738 -4.149974 1.479872  
C -2.537235 -2.712221 1.504051  
C -1.548137 -1.625657 1.936507  
H -0.989399 -1.934097 2.847165  
H -2.095993 -0.706231 2.218871  
H -2.942510 -2.452482 0.511920  
H -3.420864 -2.718315 2.170828  
H -2.084361 -4.583070 2.489959  
H -2.592988 -4.776564 0.816656  
H -0.210098 -5.365502 1.250219  
H 0.108632 -3.742641 1.825583  
H -0.508579 -4.642857 -1.031916  
H 1.020243 -4.046389 -0.404609  
H 0.098895 -2.285343 -1.736002  
H -1.516128 -2.450486 -1.034522  
P -1.580623 0.480458 -0.696431  
C -3.359631 0.133120 -0.901442  
C -4.296446 0.657192 0.005996  
C -5.636926 0.271257 -0.068315  
C -6.054551 -0.642660 -1.040464  
C -5.125342 -1.174980 -1.939671  
C -3.783029 -0.179072 -1.869260  
H -3.069552 -1.238621 -2.568350  
H -5.444778 -1.893951 -2.697792  
H -7.103636 -0.942667 -1.095546  
H -6.357790 0.686889 0.639911  
H -3.982583 1.365938 0.774737  
C -1.447891 2.097439 0.148060  
C -2.080783 3.244136 -0.358117  
C -1.933865 4.482385 0.265480  
C -1.141842 4.577061 1.413353  
C 0.503744 3.452385 1.940202  
C -0.655136 2.209273 1.311123  
O -0.043558 1.067790 1.774489  
H 0.809149 1.152389 2.918973  
H 1.186772 0.140840 3.101373  
H 0.247074 1.486247 3.804989  
H 1.658698 1.825923 2.725607  
H 0.111326 3.560529 2.831959  
H -1.013554 5.540489 1.912464  
H -2.433948 5.365156 -0.137920  
H -2.703489 3.158656 -1.252619  
C -0.889218 0.789591 -2.420765  
C 0.597239 0.382631 -2.593577  
P 1.460055 0.254494 -0.955297  
C 2.263949 1.857299 -0.619118  
C 3.389183 1.918981 0.222968  
C 3.924580 3.155227 0.592555  
C 3.342887 4.341632 0.132038  
C 2.224040 4.286455 -0.704172  
C 1.684039 3.053257 -1.077566  
H 0.798871 3.035899 -1.715834  
H 1.762522 5.207849 -1.066936  
H 3.764675 5.307184 0.421201  
H 4.805113 3.191417 1.238965  
H 3.857114 0.999341 0.583432  
C 2.778143 -0.999730 -1.015582  
C 3.702039 -1.120419 -2.063311  
C 4.679516 -2.116734 -2.043669  
C 4.740428 -2.994890 -0.959436  
C 3.835427 -2.891044 0.101680  
C 2.852072 -1.898140 0.073736  
O 1.920642 -1.758582 1.101181  
C 2.236133 -2.336452 2.379804  
H 2.274537 -3.432934 2.325706  
H 3.196362 -1.940725 2.745534  
H 1.425806 -2.050670 3.060673  
H 3.899868 -3.594576 0.930502  
H 5.500770 -3.779027 -0.931694  
H 5.391473 -2.204526 -2.866859  
H 3.654893 -0.420461 -2.901515  
H 1.121607 1.073025 -3.270632

H 0.662220 -0.623602 -3.031602  
H -1.038965 1.858991 -2.631135  
H -1.515330 0.240711 -3.137777

<sup>4</sup>B-19

Geometry with 79 atoms:  
Total energy: -3195.950826100  
Cr -0.006976 -0.098431 1.088732  
C -1.685318 -0.189357 2.314167  
C -1.580309 0.148960 3.804500  
C -0.802035 -0.828812 4.698689  
C 0.723910 -0.666822 4.776035  
C 1.567508 -1.154800 3.590330  
C 1.637525 -0.252572 2.354021  
H 2.426309 -0.652183 1.688855  
H 1.999422 0.751364 2.643310  
H 2.600036 -1.298299 3.965868  
H 1.234641 -2.171257 3.311523  
H 1.062818 -1.219554 5.669582  
H 0.964426 0.394090 4.981359  
H -1.187998 -0.715976 5.726420  
H -1.046638 -1.868950 4.410373  
H -1.158849 1.161126 3.942305  
H -2.608945 0.220120 4.209970  
H -2.190532 -1.164420 2.182830  
H -2.365919 0.546228 1.844088  
P -1.539458 0.591455 -0.930396  
C -3.195559 -0.582073 -1.112513  
C -3.330561 -1.835747 -1.737932  
C -4.573033 -2.472872 -1.777270  
C -5.689761 -1.874889 -1.184243  
C -5.559379 -0.635493 -0.550742  
C -4.320525 0.009342 -0.510814  
H -4.233985 0.978265 -0.014980  
H -6.427544 -0.163869 -0.083934  
H -6.660473 -2.375408 -1.215580  
H -4.668588 -3.441483 -2.274197  
H -2.468498 -2.325286 -2.197969  
C -1.766747 1.974527 -0.847934  
C -2.561932 2.644627 -1.793211  
C -2.676123 4.033552 -1.792116  
C -1.973533 4.770596 -0.836426  
C -1.176177 4.132083 0.115843  
C -1.074701 2.733177 0.120244  
O -0.293123 2.071035 1.059276  
C 0.214860 2.846308 2.166258  
H 1.002240 3.531158 1.818251  
H 0.638842 2.136927 2.878363  
H -0.602582 3.402019 2.646686  
H -0.640923 4.738037 0.843885  
H -2.042283 5.860865 -0.822902  
H -3.303565 4.535746 -2.531187  
H -3.105911 2.057882 -2.537972  
C -0.675493 -0.035484 -2.573321  
C 0.717998 0.600436 -2.494795  
P 1.554579 0.071774 -0.914710  
C 3.207465 0.842329 -0.922476  
C 4.334074 0.147104 -0.448421  
C 5.569992 0.792306 -0.355265  
C 5.695270 2.133952 -0.727868  
C 4.576482 2.833745 -1.191339  
C 3.337156 2.196078 -1.283883  
H 2.473932 2.763914 -1.639546  
H 4.667906 3.882717 -1.483870  
H 6.663715 2.634768 -0.656376  
H 6.439963 0.240762 0.009453  
H 4.251333 -0.902046 -0.156798  
C 1.800138 -1.720822 -1.196817  
C 2.629878 -2.178578 -2.234139  
C 2.764055 -3.537948 -2.510482  
C 2.048634 -4.458628 -1.742338  
C 1.217012 -4.033137 -0.703896  
C 1.095031 -2.665131 -0.419764  
O 0.279082 -2.210413 0.609880  
C -0.402118 -3.201485 1.408698  
H -1.162177 -3.715944 0.801386  
H 0.317626 -3.921042 1.821872  
H -0.886312 -2.668015 2.227701  
H 0.675812 -4.780657 -1.128357  
H 2.133308 -5.528687 -1.946140  
H 3.416287 -3.875024 -3.318573

H 3.184266 -1.447683 -2.828230  
H 0.638859 1.698730 -2.475673  
H 1.334831 0.323623 -3.363628  
H -1.278887 0.417658 -3.374949  
H -0.595113 -1.113469 -2.784114

<sup>45</sup>C-01

Geometry with 83 atoms:

Total energy: -3124.209554810

Cr 0.031902 -0.680024 1.183702  
P -1.762194 0.085013 -0.311839  
C -3.154347 -1.063154 -0.568595  
C -3.523366 -1.560291 -1.828244  
C -4.588854 -2.458347 -1.940352  
C -5.290210 -2.864505 -0.801512  
C -4.918700 -2.379524 0.457540  
C -3.851058 -1.488596 0.576459  
H -3.555807 -1.121552 1.562849  
H -5.460342 -2.699608 1.350849  
H -6.124832 -3.563619 -0.893868  
H -4.872887 -2.839226 -2.924290  
H -2.995941 -1.247075 -2.731430  
C -2.386923 1.732829 0.213077  
C -3.426426 2.465024 -0.411170  
C -3.719836 3.744113 0.093489  
C -3.022428 4.297704 1.167622  
C -1.996952 3.572950 1.780000  
C -1.691835 2.301048 1.300121  
H -0.892598 1.730608 1.784990  
H -1.441972 3.992325 2.622052  
H -3.279294 5.297511 1.526190  
H -4.519542 4.320829 -0.379776  
C -4.271581 1.941592 -1.553880  
C -5.634175 1.406696 -1.090771  
H -6.220738 1.044953 -1.949894  
H -5.514505 0.570511 -0.386040  
H -6.217787 2.193364 -0.586782  
H -3.747540 1.149775 -2.103257  
H -4.430364 2.761687 -2.273724  
C -0.938441 0.365149 -1.955728  
C 0.312426 1.239118 -1.777441  
P 1.532141 0.531544 -0.555286  
C 2.592778 1.966405 -0.142935  
C 2.579949 2.479468 1.163196  
C 3.383229 3.572865 1.500148  
C 4.203783 4.159376 0.532446  
C 4.220772 3.653072 -0.772687  
C 3.421089 2.559603 -1.110938  
H 3.455970 2.154886 -2.125755  
H 4.866328 4.107990 -1.527892  
H 4.835785 5.011011 0.795839  
H 3.372558 3.962812 2.520786  
H 1.950779 2.017825 1.929913  
C 2.600176 -0.636446 -1.492966  
C 2.321251 -0.945377 -2.836972  
C 3.066004 -1.904686 -3.524718  
C 4.101583 -2.573644 -2.869090  
C 4.383392 -2.273333 -1.536035  
C 3.650453 -1.312351 -0.822024  
C 4.046994 -1.026520 0.612528  
C 5.295014 -0.141286 0.733998  
H 6.162542 -0.619619 0.252408  
H 5.548207 0.032518 1.792045  
H 5.141854 0.836765 0.255152  
H 4.234797 -1.985657 1.123537  
H 3.212809 -0.555297 1.156820  
H 5.193476 -2.801810 -1.025327  
H 4.687943 -3.331863 -3.393787  
H 2.833805 -2.128409 -4.568595  
H 1.513432 -0.439816 -3.367493  
H 0.797939 1.443148 -2.743904  
H 0.035357 2.219927 -1.357900  
H -0.681165 -0.630423 -2.351654  
H -1.632081 0.837493 -2.667055  
C -0.889135 -1.282514 2.883362  
C 0.528278 -1.537145 3.331598  
C 0.978979 -2.995246 3.503706  
C 0.621656 -3.958221 2.361512  
H -0.466156 -4.144973 2.349065  
H 1.085917 -4.929747 2.597821  
C 1.063760 -3.514834 0.957681

C 0.140393 -2.507939 0.272880  
H -0.896481 -2.885080 0.235752  
H 0.477184 -2.310314 -0.759684  
H 1.118831 -4.414546 0.315233  
H 2.099732 -3.131027 0.993426  
H 0.533931 -3.370290 4.440896  
H 2.072528 -3.005168 3.655925  
H 0.807817 -0.947187 4.220578  
H 1.279783 -1.075026 2.570842  
H -1.532158 -2.167734 2.810596  
H -1.398131 -0.466950 3.420724

<sup>45</sup>C-02

Geometry with 83 atoms:

Total energy: -3124.212056970

Cr -0.194041 -0.581636 1.117732  
P -1.900762 0.048391 -0.521714  
C -3.255382 -1.149768 -0.757816  
C -4.036192 -1.464535 0.369005  
C -5.073400 -2.391824 0.266932  
C -5.333513 -3.021246 -0.956237  
C -4.556806 -2.716607 -2.076829  
C -3.519774 -1.782365 -1.982690  
H -2.927541 -1.556899 -2.871519  
H -4.756991 -3.206621 -3.032824  
H -6.142223 -3.752017 -1.033848  
H -5.677042 -2.630375 1.145921  
H -3.826118 -0.985315 1.329386  
C -2.702333 1.709779 -0.458951  
C -2.310915 2.731937 0.435348  
C -2.928295 3.991422 0.310989  
C -3.910105 4.237904 -0.645225  
C -4.309014 3.215120 -1.512549  
C -3.704424 1.965008 -1.417908  
H -4.020247 1.169781 -2.097736  
H -5.085795 3.391879 -2.260086  
H -4.367929 5.227759 -0.713412  
H -2.626842 4.794213 0.989379  
C -1.311716 2.559323 1.561197  
C -1.965845 2.547147 2.946363  
H -2.464848 3.506657 3.152344  
H -2.727911 1.756115 3.018775  
H -1.216969 2.381800 3.737378  
H -0.560416 3.364275 1.509184  
H -0.738161 1.625475 1.420597  
C -0.953821 0.120854 -2.123684  
C 0.287963 1.009209 -1.961172  
P 1.438392 0.404698 -0.621751  
C 2.483733 1.870485 -0.280523  
C 2.449412 2.465929 0.989987  
C 3.241473 3.584125 1.267723  
C 4.072561 4.113652 0.276462  
C 4.112799 3.523825 -0.992602  
C 3.324831 2.405142 -1.271245  
H 3.379349 1.935508 -2.256934  
H 4.767412 3.933277 -1.765803  
H 4.695084 4.984995 0.493911  
H 3.213770 4.037601 2.261476  
H 1.811596 2.051385 1.775226  
C 2.551203 -0.832684 -1.401161  
C 2.339463 -1.258326 -2.725437  
C 3.136767 -2.250652 -3.297612  
C 4.157543 -2.835245 -2.544953  
C 4.369278 -2.422241 -1.229288  
C 3.581154 -1.427249 -0.629749  
C 3.898798 -1.022607 0.796274  
C 5.131926 -1.016553 0.915810  
H 4.996319 0.823854 0.362122  
H 6.026865 -0.617452 0.514173  
H 5.329804 0.134252 1.970202  
H 4.065715 -1.936294 1.390057  
H 3.033069 -0.521100 1.257509  
H 5.166039 -2.885511 -0.640592  
H 4.786163 -3.615581 -2.980685  
H 2.958005 -2.564598 -4.328692  
H 1.547652 -0.817866 -3.332912  
H 0.824170 1.128633 -2.914828  
H -0.007656 2.022748 -1.643029  
H -0.677997 -0.912238 -2.387302  
H -1.605415 0.512529 -2.920301  
C -1.121967 -1.086660 2.841934

C 0.295686 -1.298637 3.307223  
C 0.754399 -2.735273 3.594929  
C 0.400053 -3.779715 2.526814  
H -0.686510 -3.973795 2.532400  
H 0.872382 -4.729095 2.828190  
C 0.834297 -3.431880 1.093968  
C -0.097243 -2.479472 0.341832  
H -1.132907 -2.860746 0.347634  
H 0.226264 -2.374853 -0.708780  
H 0.891150 -4.374081 0.515947  
H 1.869268 -3.043859 1.099737  
H 0.310584 -3.038903 4.558087  
H 1.848056 -2.728220 3.746727  
H 0.574214 -0.634431 4.142371  
H 1.046857 -0.904886 2.507377  
H -1.750712 -1.984620 2.811848  
H -1.642594 -0.253767 3.334789

<sup>45</sup>C-03

Geometry with 83 atoms:

Total energy: -3124.211024060

Cr -0.218102 -0.442897 1.198052  
P -1.903794 0.118981 -0.498485  
C -3.166842 -1.178780 -0.737104  
C -3.397537 -1.818794 -1.964467  
C -4.371563 -2.818981 -2.059849  
C -5.120274 -3.182231 -0.937943  
C -4.894885 -2.544747 0.287855  
C -3.920529 -1.551919 0.390739  
H -3.741077 -1.065224 1.352984  
H -5.476837 -2.826838 1.168629  
H -5.879800 -3.963933 -1.016446  
H -4.545191 -3.313388 -3.018734  
H -2.831532 -1.546654 -2.856976  
C -2.863965 1.693707 -0.397360  
C -2.483928 2.794274 0.405621  
C -3.327404 3.921741 0.420775  
C -4.493286 3.981788 -0.338168  
C -4.853361 2.897653 -1.144498  
C -4.046354 1.763924 -1.163976  
H -4.348022 0.910468 -1.774979  
H -5.765022 2.929479 -1.745538  
H -5.124076 4.873251 -0.298273  
H -3.057037 4.773727 1.050017  
C -1.220781 2.864158 1.243088  
C -0.253259 3.973232 0.815856  
H 0.085985 3.840948 -0.223460  
H -0.729567 4.962954 0.882108  
H 0.638202 3.989124 1.459985  
H -0.690833 1.896183 1.215134  
H -1.501341 3.011410 2.299861  
C -0.954397 0.243191 -2.094762  
C 0.330554 1.065176 -1.910427  
P 1.468575 0.352057 -0.613556  
C 2.661781 1.705651 -0.296036  
C 2.810157 2.205768 1.006156  
C 3.728412 3.225943 1.270915  
C 4.502101 3.754119 0.233593  
C 4.360951 3.258570 -1.068217  
C 3.448810 2.235278 -1.333065  
H 3.362046 1.836084 -2.346985  
H 4.970630 3.665733 -1.878448  
H 5.221354 4.550556 0.439349  
H 3.841478 3.606645 2.288820  
H 2.214808 1.791353 1.824266  
C 2.435656 -0.974953 -1.445573  
C 2.167003 -1.336514 -2.778751  
C 2.842138 -2.394500 -3.389148  
C 3.798535 -3.110606 -2.666723  
C 4.073782 -2.756021 -1.345879  
C 3.410629 -1.694839 -0.709451  
C 3.815169 -1.345420 0.708202  
C 5.128136 -0.553153 0.781281  
H 5.959456 -1.135124 0.353053  
H 5.383553 -0.316015 1.826407  
H 5.059374 0.392485 0.224271  
H 3.926066 -2.279301 1.283484  
H 3.016298 -0.776843 1.210298  
H 4.826019 -3.317077 -0.784081  
H 4.330075 -3.944919 -3.130803  
H 2.618434 -2.656325 -4.426007

H 1.425696 -0.792376 -3.364733  
H 0.855253 1.198156 -2.868649  
H 0.091833 2.077996 -1.548729  
H -0.723156 -0.787764 -2.405140  
H -1.594695 0.693085 -2.869637  
C -1.232605 -0.603168 2.939814  
C 0.145405 -0.868073 3.492821  
C 0.450236 -2.284285 4.001526  
C 0.067265 -3.433107 3.056077  
H -1.030827 -3.534951 3.007317  
H 0.431576 -4.367612 3.513347  
C 0.618194 -3.319221 1.624727  
C -0.190876 -2.420736 0.688567  
H -1.246646 -2.739114 0.659783  
H 0.212191 -2.459630 -0.339231  
H 0.640182 -4.334296 1.184186  
H 1.676319 -3.001189 1.656156  
H -0.075746 -2.414912 4.962368  
H 1.529044 -2.347931 4.227828  
H 0.460093 -0.117203 4.236618  
H 0.957167 -0.671760 2.680299  
H -1.942160 -1.434422 3.031003  
H -1.685217 0.344353 3.269345

#### <sup>45</sup>C-04

Geometry with 83 atoms:

Total energy: -3124.211055560  
Cr -0.117950 -0.612578 1.077139  
P -1.888067 -0.026590 -0.514419  
C -3.171213 -1.296134 -0.782765  
C -3.458482 -1.850692 -2.040101  
C -4.451077 -2.829033 -2.161909  
C -5.161619 -3.255216 -1.036900  
C -4.876513 -2.706627 0.218933  
C -3.882218 -1.736587 0.348262  
H -3.650369 -1.322833 1.333373  
H -5.426696 -3.040954 1.101809  
H -5.936903 -4.018832 -1.136718  
H -4.669096 -3.257677 -3.143103  
H -2.919055 -1.529891 -2.933276  
C -2.799296 1.574168 -0.372565  
C -2.497729 2.561770 0.591352  
C -3.201596 3.780034 0.535129  
C -4.181661 4.017918 -0.425049  
C -4.490337 3.027872 -1.364325  
C -3.800591 1.819293 -1.334916  
H -4.049041 1.048265 -2.068615  
H -5.264419 3.197573 -2.116297  
H -4.708970 4.974878 -0.440302  
H -2.970238 4.556158 1.269735  
C -1.505739 2.382379 1.721159  
C -2.175342 2.210438 3.087935  
H -1.426645 2.044135 3.878771  
H -2.753350 3.108030 3.357034  
H -2.871994 1.358283 3.083960  
H -0.819777 3.244640 1.744846  
H -0.861992 1.507400 1.517531  
C -0.976431 0.170797 -2.124783  
C 0.197714 1.147041 -1.956068  
P 1.409535 0.603828 -0.646766  
C 2.350519 2.131467 -0.276543  
C 2.195840 2.751167 0.973540  
C 2.893756 3.925445 1.270632  
C 3.754899 4.484007 0.321415  
C 3.918921 3.867272 -0.924390  
C 3.221904 2.694747 -1.224202  
H 3.366652 2.209282 -2.192873  
H 4.597470 4.299264 -1.664031  
H 4.305157 5.398961 0.554370  
H 2.770264 4.400383 2.246981  
H 1.535201 2.311168 1.725207  
C 2.594058 -0.531462 -1.477540  
C 2.367474 -0.962167 -2.795925  
C 3.204758 -1.902437 -3.400560  
C 4.280439 -2.423715 -2.683215  
C 4.514297 -2.001192 -1.371976  
C 3.690751 -1.057471 -0.741325  
C 3.976115 -0.598160 0.676614  
C 4.908396 -1.476162 1.508522  
H 4.971971 -1.090556 2.537978  
H 5.932790 -1.490809 1.105193

H 4.550780 -2.517230 1.559031  
H 3.015616 -0.497406 1.211720  
H 4.380002 0.428820 0.636936  
H 5.360909 -2.422632 -0.829041  
H 4.942313 -3.162921 -3.141002  
H 3.011942 -2.223245 -4.426929  
H 1.530502 -0.570315 -3.375193  
H 0.712384 1.323780 -2.912702  
H -0.168327 2.129252 -1.615251  
H -0.630618 -0.831162 -2.423590  
H -1.667689 0.535241 -2.900507  
C -1.005370 -1.296223 2.769929  
C 0.423122 -1.389994 3.240421  
C 1.028608 -2.785193 3.451156  
C 0.796188 -3.798824 2.321050  
H -0.261551 -4.113765 2.305660  
H 1.370598 -4.705320 2.573433  
C 1.192066 -3.325121 0.913304  
C 0.159568 -2.444255 0.207494  
H -0.830626 -2.931520 0.194253  
H 0.462302 -2.252022 -0.836244  
H 1.359297 -4.220766 0.285283  
H 2.175314 -2.820928 0.949330  
H 0.614209 -3.190231 4.389813  
H 2.114311 -2.670778 3.616931  
H 0.627338 -0.748774 4.114037  
H 1.133824 -0.876758 2.473893  
H -1.538996 -2.250103 2.681903  
H -1.611083 -0.550129 3.302379

#### <sup>45</sup>C-05

Geometry with 83 atoms:

Total energy: -3124.209748240  
Cr -0.154901 -0.370720 1.122028  
P -1.920889 -0.075793 -0.573774  
C -2.638306 -1.658601 -1.132073  
C -3.237080 -2.472827 -0.152046  
C -3.778187 -3.710468 -0.499843  
C -3.710552 -4.158172 -1.824556  
C -3.106651 -3.360396 -2.799273  
C -2.573650 -2.112347 -2.458574  
H -2.112341 -1.505392 -3.239671  
H -3.050844 -3.706661 -3.834102  
H -4.127513 -5.131193 -2.095194  
H -4.247465 -4.331875 0.266580  
H -3.280964 -2.133677 0.886244  
C -3.327490 1.049047 -0.202218  
C -3.098783 2.276288 0.467697  
C -4.202163 3.109893 0.712230  
C -5.492133 2.751453 0.318831  
C -5.708522 1.538964 -0.340014  
C -4.629288 0.695083 -0.600659  
H -4.804249 -0.250199 -1.117471  
H -6.714113 1.249499 -0.653940  
H -6.329271 3.422505 0.526089  
H -4.046805 4.065002 1.219329  
C -1.717698 2.737577 0.895307  
C -1.599213 3.187954 2.353349  
H -0.557419 3.455310 2.594042  
H -2.214440 4.076886 2.556699  
H -1.922005 2.395675 3.046183  
H -1.387754 3.555922 0.231418  
H -0.983235 1.932144 0.710436  
C -1.085292 0.708557 -2.041290  
C 0.310701 0.122886 -2.287913  
P 1.406426 0.368412 -0.798271  
C 1.946586 2.120605 -0.926382  
C 1.717857 3.002268 0.141880  
C 2.124300 4.337646 0.059520  
C 2.767257 4.800793 -1.091662  
C 3.011390 3.925277 -2.156634  
C 2.607402 2.591435 -2.074553  
H 2.820103 1.911088 -2.903695  
H 3.525314 4.282691 -3.052301  
H 3.087083 5.843576 -1.157609  
H 1.941507 5.014616 0.897679  
H 1.229538 2.648379 1.052928  
C 2.920317 -0.621586 -1.122555  
C 3.055730 -1.370775 -2.304349  
C 4.183501 -2.163230 -2.528025  
C 5.188735 -2.214672 -1.563140

C 5.063484 -1.473143 -0.385761  
C 3.944727 -0.664394 -0.138038  
C 3.846320 0.157494 1.133056  
C 4.710936 -0.292607 2.309280  
H 4.479064 0.308574 3.202411  
H 5.785796 -0.167862 2.106755  
H 4.535825 -1.351660 2.558352  
H 2.791749 0.169750 1.457307  
H 4.074720 1.210391 0.888438  
H 5.861700 -1.527472 0.355666  
H 6.075296 -2.833083 -1.723213  
H 4.270096 -2.737190 -3.453562  
H 2.282239 -1.347866 -3.072603  
H 0.239431 -0.961467 -2.463582  
H 0.771006 0.575985 -3.179515  
H -1.726608 0.615764 -2.931411  
H -1.028268 1.785543 -1.816466  
C -1.115596 -0.683124 2.882315  
C 0.284684 -0.586611 3.432674  
C 0.937168 -1.852288 4.004271  
C 0.851895 -3.107117 3.123349  
H -0.183472 -3.489518 3.108941  
H 1.450885 -3.891873 3.613731  
C 1.333297 -2.934234 1.672650  
C 0.304123 -2.326770 0.718177  
H -0.654685 -2.868883 0.774029  
H 0.658713 -2.381266 -0.326086  
H 1.607066 -3.933259 1.283066  
H 2.278270 -2.358055 1.652342  
H 0.465724 -2.061326 4.979385  
H 1.998094 -1.629718 4.214212  
H 0.407367 0.257403 4.131783  
H 1.020721 -0.238079 2.599658  
H -1.601702 -1.660201 2.997390  
H -1.788435 0.129932 3.191147

#### <sup>45</sup>C-06

Geometry with 83 atoms:

Total energy: -3124.207618780  
Cr 0.031910 -0.672847 1.001275  
P 1.694055 0.208908 -0.630807  
C 2.372309 1.911503 -0.576882  
C 1.891321 2.853622 0.343958  
C 2.395636 4.158736 0.337955  
C 3.378904 4.527311 -0.583589  
C 3.861142 3.589667 -1.504973  
C 3.362041 2.286445 -1.503322  
H 3.754686 1.554683 -2.214259  
H 4.633301 3.873824 -2.223953  
H 3.774065 5.546062 -0.584033  
H 2.019216 4.886892 1.060417  
H 1.131335 2.574800 1.073909  
C 3.120592 -0.901899 -0.932092  
C 4.079804 -1.084372 0.095020  
C 5.126570 -1.990796 -0.133629  
C 5.235460 -2.701942 -1.329528  
C 4.285365 -2.517040 -2.336525  
C 3.233700 -1.621577 -2.135886  
H 2.501929 -1.491207 -2.934104  
H 4.359644 -3.066766 -3.277733  
H 6.060909 -3.403359 -1.473700  
H 5.871507 -2.141831 0.652804  
C 4.048146 -0.325122 1.406114  
C 5.085662 0.803374 1.478871  
H 6.107936 0.409424 1.363730  
H 4.922557 1.548995 0.688840  
H 5.029400 1.320540 2.449883  
H 4.230742 -1.038750 2.228664  
H 3.044425 0.087581 1.589774  
C 0.693296 0.243793 -2.207955  
C -0.588951 1.065852 -2.007390  
P -1.664284 0.827227 -0.697203  
C -2.389518 -1.160005 -1.567437  
C -1.889022 -2.437627 -1.264375  
C -2.396142 -3.571235 -1.905683  
C -3.415560 -3.433443 -2.852211  
C -3.922547 -2.164322 -3.157683  
C -3.413296 -1.030647 -2.520274  
H -3.826183 -0.044913 -2.749629  
H -4.724156 -2.059414 -3.892960  
H -3.820652 -4.317493 -3.350523

H -2.001036 -4.560065 -1.660833  
H -1.102549 -2.556128 -0.508132  
C -3.040829 1.457812 -0.393864  
C -3.156249 2.643324 -1.145192  
C -4.179577 3.556711 -0.889695  
C -5.100570 3.296111 0.127730  
C -4.991771 2.124275 0.876826  
C -3.974511 1.186618 0.638487  
C -3.951570 -0.083347 1.461805  
C -4.958264 -1.140340 0.986739  
H -5.988279 -0.753288 1.037099  
H -4.904975 -2.041143 1.619187  
H -4.764014 -1.441415 -0.053385  
H -4.162046 0.172185 2.513304  
H -2.938750 -0.514810 1.453145  
H -5.713253 1.924734 1.674306  
H -5.903302 4.006683 0.339314  
H -4.254110 4.469679 -1.485112  
H -2.449708 2.868483 -1.945028  
H -0.341748 2.086381 -1.672471  
H -1.142627 1.146657 -2.955526  
H 1.304225 0.671885 -3.017756  
H 0.447682 -0.793632 -2.487009  
C 1.003643 -2.212558 1.868143  
C -0.363247 -2.526747 2.417951  
C -0.580936 -2.353442 3.926893  
C -0.145159 -1.001993 4.511324  
H 0.955424 -0.916717 4.497742  
H -0.431121 -0.994675 5.575699  
C -0.749518 0.227555 3.813104  
C -0.033875 0.664464 2.536034  
H 1.022974 0.912044 2.741330  
H -0.526198 1.545636 2.084496  
H -0.724756 1.075462 4.524211  
H -1.822911 0.051958 3.614236  
H -0.036159 -3.164818 4.438393  
H -1.651365 -2.510862 4.146532  
H -0.745837 -3.505598 2.083608  
H -1.161466 -1.842614 1.922734  
H 1.775147 -1.970642 2.609224  
H 1.382839 -2.930470 1.124301

#### <sup>45</sup>C-07

Geometry with 83 atoms:

Total energy: -3124.210404520  
Cr -0.126962 -1.105693 0.826709  
P -1.927970 -0.090089 -0.522727  
C -3.504032 -0.974618 -0.804106  
C -3.647036 -2.284545 -0.318496  
C -4.830355 -2.992021 -0.549472  
C -5.875776 -2.394772 -1.259133  
C -5.741304 -1.085412 -1.735855  
C -4.561925 -0.373789 -1.508635  
H -4.473105 0.653258 -1.870655  
H -6.561501 -0.614645 -2.283219  
H -6.801580 -2.947396 -1.437140  
H -4.935783 -4.010781 -0.168807  
H -2.836054 -2.744902 0.248053  
C -2.373931 1.650065 -0.100661  
C -2.618383 2.025135 1.243056  
C -2.922961 3.368693 1.516501  
C -2.996433 4.326377 0.504749  
C -2.775092 3.949164 -0.821289  
C -2.470768 2.620371 -1.116941  
H -2.310335 2.349331 -2.161210  
H -2.840799 4.684431 -1.626507  
H -3.235075 5.363976 0.750460  
H -3.112240 3.664365 2.552232  
C -2.513080 1.059804 2.405729  
C -1.112725 1.043968 3.031855  
H -0.334100 0.763501 2.293971  
H -0.826872 2.043331 3.395035  
H -1.052937 0.340693 3.875247  
H -2.799360 0.042639 2.097100  
H -3.239727 1.355680 3.178573  
C -1.113365 0.013188 -2.193513  
C 0.205346 0.802706 -2.159754  
P 1.289982 0.483196 -0.656636  
C 1.870256 2.185756 -0.277324  
C 1.071098 3.007136 0.536351  
C 1.440585 4.332007 0.780478

C 2.612848 4.847587 0.218563  
C 3.410991 4.035796 -0.593863  
C 3.042958 2.710673 -0.844737  
H 3.673827 2.086051 -1.480755  
H 4.325828 4.435495 -1.038276  
H 2.903717 5.883040 0.4111744  
H 0.807702 4.961354 1.410890  
H 0.147106 2.622941 0.971036  
C 2.788278 -0.446006 -1.183150  
C 2.908706 -0.955904 -2.487792  
C 3.994974 -1.751225 -2.854403  
C 4.980251 -2.049355 -1.910964  
C 4.865188 -1.552762 -0.612645  
C 3.780082 -0.754001 -0.217087  
C 3.734579 -0.280175 1.224803  
C 4.836710 0.723960 1.586971  
H 5.837787 0.300302 1.411255  
H 4.772022 1.003589 2.650548  
H 4.748974 1.642930 0.989222  
H 3.824208 -1.164378 1.879907  
H 2.758049 0.168829 1.459222  
H 5.632793 -1.799502 0.125999  
H 5.834381 -2.673995 -2.183373  
H 4.066990 -2.137142 -3.873803  
H 2.146346 -0.743385 -3.238376  
H 0.770506 0.655162 -3.091328  
H -0.004558 1.879624 -2.101978  
H -0.957260 -1.034012 -2.491827  
H -1.804686 0.445293 -2.933546  
C -0.874344 -2.325492 2.271461  
C 0.583183 -2.430681 2.641599  
C 1.270180 -3.793065 2.480783  
C 1.048012 -4.487208 1.130736  
H 0.011536 -4.860722 1.061491  
H 1.687201 -5.385183 1.112253  
C 1.351285 -3.624886 -0.103128  
C 0.253335 -2.637806 -0.506765  
H -0.710241 -3.160009 -0.641690  
H 0.516876 -2.176086 -1.471980  
H 1.523132 -4.304332 -0.959446  
H 2.311959 -3.095792 0.032795  
H 0.911869 -4.447439 3.293227  
H 2.353838 -3.659349 2.645546  
H 0.802343 -2.002886 3.633903  
H 1.224879 -1.715142 1.984096  
H -1.339301 -3.262060 1.940649  
H -1.504103 -1.818636 3.015353

#### <sup>45</sup>C-08

Geometry with 83 atoms:

Total energy: -3124.210712500  
Cr -0.187314 -0.871637 1.042084  
P -1.969352 0.021686 -0.471363  
C -3.447411 -0.997112 -0.828724  
C -3.699013 -2.138437 -0.050304  
C -4.824514 -2.927929 -0.305740  
C -5.702077 -2.583559 -1.336953  
C -5.458750 -1.443433 -2.112330  
C -4.339381 -0.649529 -1.858933  
H -4.172269 0.249182 -2.457451  
H -6.148016 -1.168676 -2.914414  
H -6.581493 -3.200864 -1.536272  
H -5.014943 -3.814011 0.304568  
H -3.016225 -2.407839 0.757430  
C -2.596918 1.741162 -0.189502  
C -2.883617 2.216376 1.113509  
C -3.382837 3.522305 1.253140  
C -3.603120 4.348912 0.151905  
C -3.323455 3.876434 -1.131727  
C -2.826070 2.583773 -1.295239  
H -2.620661 2.237392 -2.309064  
H -3.494149 4.508356 -2.006350  
H -3.994954 5.358707 0.295756  
H -3.606351 3.894084 2.256926  
H -2.629753 1.411056 2.370918  
C -1.187869 1.553832 2.871290  
H -0.462849 1.167948 2.126306  
H -0.920768 2.610266 3.026014  
H -1.026621 1.012472 3.815220  
H -2.868034 0.347920 2.214097  
H -3.312576 1.760136 3.160887

C -1.039811 0.142261 -2.079939  
C 0.203741 1.030376 -1.933427  
P 1.361951 0.491981 -0.566100  
C 2.268512 2.041652 -0.193435  
C 2.178450 2.624828 1.078851  
C 2.865413 3.809438 1.362059  
C 3.644733 4.418531 0.374763  
C 3.739693 3.841009 -0.897006  
C 3.058595 2.655795 -1.180727  
H 3.157313 2.197763 -2.168274  
H 4.354152 4.311816 -1.668266  
H 4.184455 5.342410 0.596777  
H 2.794153 4.253971 2.357652  
H 1.580462 2.150871 1.860101  
C 2.606153 -0.614932 -1.352333  
C 2.414954 -1.089248 -2.662932  
C 3.306792 -1.995457 -3.238117  
C 4.406199 -2.442394 -2.502055  
C 4.596404 -1.984385 -1.198270  
C 3.709948 -1.078152 -0.594653  
C 3.989580 -0.643694 0.830594  
C 5.144033 0.360033 0.951290  
H 4.931961 1.282703 0.391765  
H 6.078717 -0.066965 0.554780  
H 5.316842 0.631344 2.004894  
H 4.227608 -1.541241 1.426480  
H 3.085355 -0.212107 1.288017  
H 5.451247 -2.346323 -0.619979  
H 5.111123 -3.153294 -2.939857  
H 3.139816 -2.350793 -4.257638  
H 1.559171 -0.759637 -3.254056  
H 0.746836 1.114927 -2.887002  
H -0.092518 2.053618 -1.655339  
H -0.781790 -0.892056 -2.352755  
H -1.695141 0.517833 -2.879534  
C -0.903653 -1.866601 2.665501  
C 0.564811 -1.959529 2.987885  
C 1.215154 -3.349461 2.979449  
C 0.904307 -4.215688 1.751081  
H -0.143206 -4.561971 1.786926  
H 1.519660 -5.127238 1.825717  
C 1.159878 -3.542820 0.394018  
C 0.071297 -2.579088 -0.083174  
H -0.912802 -3.077973 -0.095543  
H 0.291790 -2.252265 -1.112247  
H 1.260188 -4.339895 -0.367197  
H 2.143158 -3.039038 0.402316  
H 0.888244 -3.877653 3.890982  
H 2.308511 -3.224772 3.068927  
H 0.837627 -1.409541 3.903658  
H 1.192555 -1.355888 2.212397  
H -1.404813 -2.824594 2.484072  
H -1.486629 -1.243086 3.356086

#### <sup>45</sup>C-09

Geometry with 83 atoms:

Total energy: -3124.210726580  
Cr 0.044026 -1.032149 0.835402  
P -1.744961 0.186892 -0.609698  
C -3.054256 -0.863565 -1.344073  
C -2.738151 -1.724705 -2.410953  
C -3.699754 -2.602746 -2.917358  
C -4.983493 -2.635596 -2.363278  
C -5.304539 -1.780831 -1.304343  
C -4.347645 -0.898633 -0.794743  
H -4.615782 -0.226792 0.023485  
H -6.309163 -1.793993 -0.874608  
H -5.734138 -3.322918 -2.760641  
H -3.444339 -3.262256 -3.750372  
H -1.741482 -1.713344 -2.859177  
C -2.615221 1.643555 0.094925  
C -2.632899 1.897458 1.887744  
C -3.285213 3.057677 1.939912  
C -3.904239 3.942399 1.056279  
C -3.889774 3.681320 -0.316751  
C -3.248490 2.537230 -0.788926  
H -3.243765 2.335137 -1.863112  
H -4.374815 4.365226 -1.410743  
H -4.400723 4.836635 1.440937  
H -3.306184 3.267546 3.012819  
C -2.047818 0.953518 2.520394



C -4.827731 -2.758586 0.254713  
 C -3.821393 -1.803329 0.410859  
 H -3.468018 -1.544699 1.412399  
 H -5.265821 -3.234555 1.135257  
 H -6.049326 -3.863628 -1.148325  
 H -5.034512 -2.781465 -3.151823  
 H -3.266016 -1.080762 -2.890447  
 C -2.883137 1.686433 -0.335370  
 C -3.020945 2.429802 0.860953  
 C -3.747381 3.632720 0.814176  
 C -4.339243 4.091737 -0.361685  
 C -4.225484 3.338919 -1.533097  
 C -3.506294 2.145491 -1.511873  
 H -3.447480 1.557464 -2.429806  
 H -4.700692 3.673539 -2.458132  
 H -4.899860 5.029700 -0.360524  
 H -3.856652 4.215205 1.733128  
 C -2.410757 2.008189 2.180523  
 C -0.932582 2.389580 2.308109  
 H -0.325073 1.932603 1.505153  
 H -0.785416 3.476383 2.209259  
 H -0.516907 2.076095 3.279123  
 H -2.527934 0.923889 2.323168  
 H -2.972984 2.483212 2.999164  
 C -1.018448 0.206856 -2.029752  
 C 0.217407 1.103665 -1.876160  
 P 1.411982 0.486269 -0.584222  
 C 2.451994 1.959789 -0.252160  
 C 2.540176 2.480949 1.047933  
 C 3.341067 3.596882 1.308238  
 C 4.057034 4.200173 0.270515  
 C 3.974433 3.685188 -1.028630  
 C 3.179016 2.567817 -1.289923  
 H 3.138353 2.157154 -2.302104  
 H 4.539109 4.151535 -1.839562  
 H 4.685289 5.070695 0.474282  
 H 3.408964 3.991997 2.324708  
 H 1.995496 2.009138 1.868965  
 C 2.519468 -0.717022 -1.429700  
 C 2.240327 -1.148472 -2.739522  
 C 3.024405 -2.122046 -3.360119  
 C 4.102589 -2.681964 -2.671807  
 C 4.385221 -2.260135 -1.372706  
 C 3.611330 -1.283652 -0.725730  
 C 4.011014 -0.868934 0.675912  
 C 5.229237 0.064261 0.710910  
 H 6.107835 -0.421345 0.257696  
 H 5.486773 0.330142 1.748510  
 H 5.037283 0.995492 0.158458  
 H 4.236184 -1.777555 1.259196  
 H 3.167867 -0.383184 1.190351  
 H 5.228356 -2.701897 -0.834064  
 H 4.721207 -3.448552 -3.144670  
 H 2.790128 -2.440624 -4.378565  
 H 1.404146 -0.728017 -3.299113  
 H 0.727317 1.247108 -2.841153  
 H -0.080316 2.108011 -1.532352  
 H -0.743458 -0.822401 -2.306510  
 H -1.662408 0.593482 -2.832473  
 C -0.845229 -1.248315 2.950638  
 C 0.627116 -1.419742 3.216054  
 C 1.164055 -2.846291 3.395022  
 C 0.731926 -3.853843 2.320794  
 H -0.338191 -4.098303 2.436595  
 H 1.272636 -4.794808 2.514651  
 C 0.988568 -3.410027 0.873066  
 C -0.040298 -2.439149 0.290976  
 H -1.059589 -2.852498 0.381643  
 H 0.165525 -2.270202 -0.779821  
 H 0.995652 -4.313651 0.234137  
 H 2.009211 -2.995399 0.785282  
 H 0.837439 -3.204539 4.385825  
 H 2.266782 -2.803296 3.429107  
 H 0.992722 -0.765072 4.024439  
 H 1.257579 -0.995603 2.329742  
 H -1.434788 -2.172690 2.935022  
 H -1.330525 -0.479254 3.568486

<sup>45</sup>C-13  
 Geometry with 83 atoms:  
 Total energy: -3124.207988990

Cr 0.003947 -0.633935 1.059725  
 P -1.883554 0.091820 -0.536507  
 C -3.233996 -1.096611 -0.869966  
 C -4.368781 -1.073819 -0.037522  
 C -5.372475 -2.031863 -0.186740  
 C -5.256397 -3.026025 -1.165082  
 C -4.133147 -3.054520 -1.995011  
 C -3.123581 -2.097144 -1.849895  
 H -2.254820 -2.142538 -2.508688  
 H -4.038182 -3.825386 -2.763758  
 H -6.042655 -3.775982 -1.280389  
 H -6.250823 -2.001370 0.462653  
 H -4.475879 -0.296348 0.723964  
 C -2.718310 1.729968 -0.399468  
 C -2.400471 2.669872 0.608473  
 C -3.069978 3.907270 0.593505  
 C -4.021992 4.215479 -0.377294  
 C -4.332889 3.281000 -1.369850  
 C -3.682597 2.049159 -1.376144  
 H -3.934609 1.317419 -2.148009  
 H -5.078386 3.510110 -2.134836  
 H -4.522746 5.186568 -0.359494  
 H -2.834863 4.643522 1.366987  
 C -1.433606 2.398551 1.743902  
 C -2.093385 1.688626 2.933428  
 H -1.370188 1.515346 3.746352  
 H -2.916428 2.297516 3.337954  
 H -2.523755 0.717347 2.638492  
 H -1.010046 3.355974 2.085853  
 H -0.558774 1.830137 1.381874  
 C -2.921910 0.253396 -2.124216  
 C 0.282088 1.181540 -1.911548  
 P 1.463353 0.548435 -0.611892  
 C 2.421914 2.041981 -0.159833  
 C 3.219053 2.684826 -1.122427  
 C 3.921992 3.843852 -0.787135  
 C 3.838675 4.365882 0.508952  
 C 3.055607 3.723719 1.472518  
 C 2.350631 2.562987 1.140909  
 H 1.757260 2.055643 1.904412  
 H 2.998045 4.122550 2.488185  
 H 4.391913 5.271667 0.769077  
 H 4.541266 4.339020 -1.539039  
 H 3.300684 2.273830 -2.132207  
 C 2.632177 -0.572254 -1.483722  
 C 2.391426 -0.958506 -2.813817  
 C 3.223480 -1.877610 -3.455879  
 C 4.307129 -2.420586 -2.765594  
 C 4.552667 -2.041320 -1.443949  
 C 3.733679 -1.119678 -0.774653  
 C 4.038261 -0.701508 0.650458  
 C 4.734609 -1.740811 1.528809  
 H 4.177846 -2.691986 1.543678  
 H 4.805513 -1.372658 2.564108  
 H 5.761007 -1.957055 1.194521  
 H 3.098478 -0.410406 1.141344  
 H 4.642421 0.223038 0.619522  
 H 5.406633 -2.476202 -0.922404  
 H 4.965672 -3.142816 -3.254301  
 H 3.021118 -2.165488 -4.490134  
 H 1.547939 -0.550530 -3.371568  
 H 0.819097 1.368629 -2.853595  
 H -0.049941 2.166714 -1.545869  
 H -0.594884 -0.756622 -2.415722  
 H -1.578285 0.637860 -2.920847  
 C 1.062384 -0.881691 2.758014  
 C -0.197428 -1.563330 3.248571  
 C -0.119921 -3.081334 3.495927  
 C -0.273793 -3.973419 2.255746  
 H -1.326906 -3.944417 1.918558  
 H -0.089863 -5.013578 2.571512  
 C 0.626800 -3.643453 1.054000  
 C 0.140152 -2.485792 0.182541  
 H -0.881083 -2.697496 -0.185954  
 H 0.799724 -2.354192 -0.690879  
 H 0.675807 -4.545341 0.413926  
 H 1.664131 -3.470804 1.390652  
 H -0.900797 -3.363590 4.220926  
 H 0.845947 -3.287988 3.987057  
 H -1.064153 -1.420079 2.492868  
 H -0.627005 -1.041705 4.119041

H 1.293896 0.065004 3.272107  
 H 1.950541 -1.523580 2.718582

<sup>45</sup>C-14  
 Geometry with 83 atoms:  
 Total energy: -3124.208436480  
 Cr 0.201732 -0.890121 1.017910  
 P 1.676319 0.491463 -0.435540  
 C 1.351293 2.264569 -0.084496  
 C 1.073102 2.657154 1.236417  
 C 0.780226 3.990768 1.534853  
 C 0.762474 4.947101 0.516701  
 C 1.056075 4.570345 -0.798447  
 C 1.353556 3.239585 -1.098741  
 H 1.591829 2.970215 -2.129970  
 H 1.055559 5.317822 -1.595483  
 H 0.526350 5.988776 0.747087  
 H 0.564183 4.279934 2.566042  
 H 1.094423 1.924594 2.046054  
 C 3.504497 0.325663 -0.558874  
 C 4.114581 -0.910913 -0.882369  
 C 5.517579 -0.971456 -0.902202  
 C 6.306906 0.139936 -0.608522  
 C 5.698260 1.354030 -0.281771  
 C 4.307068 1.443012 -0.254438  
 H 3.844409 2.394696 0.009759  
 H 6.302656 2.232435 -0.043791  
 H 7.396254 0.056502 -0.628734  
 H 5.997392 -1.922567 -1.149785  
 C 3.337036 -2.159429 -1.238112  
 C 3.371039 -2.489461 -2.736664  
 H 2.975768 -1.658809 -3.342831  
 H 4.400430 -2.680089 -3.078580  
 H 2.772918 -3.389134 -2.954073  
 H 2.296057 -2.068833 -0.899156  
 C 3.755549 -3.009279 -0.673570  
 C 0.954923 0.227528 -2.137118  
 C -0.528475 0.622514 -2.198632  
 P -1.527181 -0.006152 -0.736732  
 C -2.659958 -1.266661 -1.434261  
 C -2.177395 -2.207656 -2.362086  
 C -3.005782 -3.235398 -2.820327  
 C -4.319910 -3.340848 -2.353436  
 C -4.805311 -2.409727 -1.430194  
 C -3.982551 -1.377453 -0.970663  
 H -4.379013 -0.648425 -0.260368  
 H -5.833846 -2.481217 -1.068035  
 H -4.965950 -4.145510 -2.712432  
 H -2.621603 -3.956746 -3.545678  
 H -1.153291 -2.145065 -2.739297  
 C -2.603442 1.417642 -0.290342  
 C -3.267833 2.094453 -1.331385  
 C -4.059398 3.211717 -1.073517  
 C -4.194903 3.666814 0.241400  
 C -3.551125 2.994527 1.279631  
 C -2.751336 1.861922 1.044389  
 C -2.172922 1.136921 2.242458  
 C -3.041777 -0.043294 2.695546  
 H -2.593400 -0.562058 3.557533  
 H -3.180905 -0.775578 1.884976  
 H -4.041968 0.307395 2.993857  
 H -2.056985 1.848852 3.074142  
 H -1.141290 0.792736 2.030905  
 H -3.669527 3.352391 2.306139  
 H -4.806530 4.545723 0.459632  
 H -4.566481 3.724917 -1.893865  
 H -3.167581 1.738914 -2.360184  
 H -0.634840 1.715649 -2.191903  
 H -0.983671 0.259060 -3.132140  
 H 1.540637 0.780128 -2.888241  
 H 1.083949 -0.841875 -2.357134  
 C 0.178252 -2.804438 0.392725  
 C -0.867475 -2.960465 1.469964  
 C -0.508092 -3.824656 2.685252  
 C 0.823750 -3.492576 3.374955  
 H 1.669673 -3.804793 2.737638  
 H 0.888695 -4.119255 4.279598  
 C 1.015959 -2.015761 3.760121  
 C 1.476679 -1.107241 2.611354  
 H 2.456673 -1.443052 2.225495  
 H 1.631912 -0.072582 2.982466

H 1.761801 -1.970926 4.576231  
H 0.079103 -1.630714 4.209483  
H -0.494351 -4.877517 2.355915  
H -1.326889 -3.742119 3.421474  
H -1.843856 -3.256425 1.052894  
H -1.147780 -1.934712 1.905133  
H 1.117543 -3.341100 0.572747  
H -0.186070 -2.961715 -0.630744

<sup>45</sup>C-15

Geometry with 83 atoms:

Total energy: -3124.205982690  
Cr 0.075569 -0.811099 0.978340  
P 1.622622 0.336724 -0.609242  
C 2.189256 2.044422 -0.249903  
C 1.781354 2.712208 0.913531  
C 2.206337 4.022725 1.155660  
C 3.039463 4.669938 0.239528  
C 3.450192 4.006496 -0.923033  
C 3.029201 2.698597 -1.168612  
H 3.372095 2.180541 -2.068233  
H 4.107740 4.507676 -1.637463  
H 3.374554 5.692078 0.431866  
H 1.888300 4.535740 2.066465  
H 1.142532 2.208352 1.639105  
C 3.108830 -0.586664 -1.149733  
C 4.164965 -0.807840 -0.231230  
C 5.262212 -1.570638 -0.661080  
C 5.327331 -2.106714 -1.947561  
C 4.279896 -1.887334 -2.845323  
C 3.176434 -1.132741 -2.445529  
H 2.368021 -0.973854 -3.160854  
H 4.318717 -2.301155 -3.855652  
H 6.194980 -2.699128 -2.248204  
H 6.082532 -1.750503 0.039528  
C 4.183873 -0.242439 1.175826  
C 5.139459 0.946480 1.343969  
H 6.174434 0.659734 1.098889  
H 4.858545 1.783244 0.688125  
H 5.126496 1.309878 2.383773  
H 4.484676 -1.046787 1.867830  
H 3.171374 0.054816 1.489351  
C 0.571083 0.600140 -2.126085  
C -0.704765 1.372696 -1.760847  
P -1.727878 0.402663 -0.539075  
C -2.432052 -0.918619 -1.604526  
C -1.988770 -2.238288 -1.422807  
C -2.474540 -3.269713 -2.232121  
C -3.413600 -2.985352 -3.227578  
C -3.863049 -1.672079 -3.413856  
C -3.375527 -0.641450 -2.607610  
H -3.742854 0.378630 -2.748492  
H -4.601246 -1.451857 -4.188844  
H -3.800463 -3.789298 -3.858419  
H -2.123815 -4.293370 -2.081228  
H -1.261206 -2.473771 -0.634998  
C -3.130669 1.488265 -0.067950  
C -3.189834 2.821365 -0.518033  
C -4.219944 3.670549 -0.112051  
C -5.206476 3.195053 0.754773  
C -5.155345 1.874840 1.202638  
C -4.131469 0.999011 0.808767  
C -4.176118 -0.431646 1.306010  
C -5.233926 -1.289962 0.599006  
H -5.044819 -1.346184 -0.483104  
H -6.242413 -0.871196 0.742998  
H -5.233852 -2.316420 0.999256  
H -4.382673 -0.422820 2.389498  
H -3.191164 -0.908129 1.190156  
H -5.929561 1.505733 1.881316  
H -6.015397 3.852240 1.083119  
H -4.248978 4.700921 -0.474047  
H -2.432284 3.214522 -1.196816  
H -0.445399 2.338746 -1.299738  
H -1.300345 1.580670 -2.663364  
H 1.152764 1.150586 -2.882014  
H 0.321383 -0.385697 -2.549881  
C 1.238579 -2.469536 1.249657  
C 0.788533 -3.500331 2.288191  
C 0.759319 -2.960108 3.728241  
C -0.511309 -2.178282 4.091278

H -0.397458 -1.738108 5.096459  
H -1.358979 -2.882624 4.155588  
C -0.900899 -1.048549 3.130100  
C 0.140265 -0.003452 2.812637  
H 1.090871 -0.087359 3.354889  
H -0.243522 1.027181 2.815429  
H -1.860081 -0.597530 3.430908  
H -1.232754 -1.574415 2.159261  
H 1.653514 -2.333099 3.890997  
H 0.847501 -3.796175 4.441167  
H 1.474035 -4.368175 2.254625  
H -0.206734 -3.912948 2.031081  
H 2.286596 -2.180882 1.428213  
H 1.199768 -2.890528 0.220007

<sup>45</sup>C-16

Geometry with 83 atoms:

Total energy: -3124.210026070  
Cr -0.042492 -1.019759 0.854472  
P -1.921001 -0.193811 -0.526961  
C -3.401304 -1.227405 -0.819141  
C -4.486336 -0.745279 -1.572438  
C -5.596332 -1.561004 -1.797835  
C -5.635044 -2.857350 -1.270381  
C -4.563168 -3.336948 -0.512812  
C -3.448134 -2.525106 -0.284415  
H -2.616094 -2.896232 0.316318  
H -4.594349 -4.345478 -0.093539  
H -6.507366 -3.491596 -1.446409  
H -6.438050 -1.182161 -2.382659  
H -4.474278 0.271902 -1.971494  
C -2.542661 1.486109 -0.077546  
C -2.773800 1.828495 1.277590  
C -3.212961 3.129952 1.571822  
C -3.429236 4.077314 0.570844  
C -3.217355 3.731142 -0.765132  
C -2.781150 2.444404 -1.081654  
H -2.627006 2.198949 -2.133246  
H -3.391663 4.457663 -1.561986  
H -3.770024 5.081752 0.833383  
H -3.393231 3.400591 2.616006  
C -2.519697 0.879328 2.431768  
C -1.091325 0.980512 2.980255  
H -0.328630 0.735746 2.209665  
H -0.855594 2.008453 3.295571  
H -0.934231 0.311518 3.838206  
H -2.738834 -0.159369 2.142145  
H -3.221039 1.119343 3.246070  
C -1.115584 0.019397 -2.191174  
C 0.097109 0.960105 -2.126671  
P 1.258005 0.660138 -0.680069  
C 1.733240 2.381590 -0.249548  
C 2.925057 2.970893 -0.700103  
C 3.211040 4.302933 -0.385783  
C 2.309224 5.058650 0.369981  
C 1.115462 4.479414 0.812858  
C 0.829802 3.146348 0.509528  
H -0.111465 2.711529 0.852681  
H 0.401396 5.065305 1.396806  
H 2.535475 6.100261 0.610820  
H 4.141858 4.753394 -0.739304  
H 3.631909 2.391827 -1.298902  
C 2.772782 -0.162215 -1.318154  
C 2.810516 -0.668177 -2.628188  
C 3.904828 -1.402883 -3.087877  
C 4.979501 -1.639702 -2.231366  
C 4.948697 -1.148517 -0.924251  
C 3.859146 -0.411893 -0.435271  
C 3.857948 0.100020 0.993673  
C 4.716182 -0.675692 1.992641  
H 5.791906 -0.573742 1.783267  
H 4.474641 -1.750887 1.988028  
H 4.550126 -0.293695 3.011913  
H 2.818061 0.120301 1.362138  
H 4.168474 1.159396 0.991183  
H 5.794636 -1.354255 -0.267070  
H 5.843436 -2.213494 -2.575499  
H 3.911034 -1.788814 -4.109778  
H 1.975154 -0.504339 -3.309959  
H 0.648759 0.959522 -3.078228  
H -0.240425 1.994821 -1.976556

H -0.833894 -0.998311 -2.500562  
H -1.846741 0.375009 -2.933439  
C -0.637992 -2.288604 2.323614  
C 0.828107 -2.250003 2.669676  
C 1.636580 -3.545571 2.518821  
C 1.455084 -4.282820 1.185546  
H 0.459405 -4.757999 1.146695  
H 2.179196 -5.113851 1.166179  
C 1.645451 -3.416981 -0.068729  
C 0.451385 -2.542104 -0.458979  
H -0.461626 -3.154946 -0.560255  
H 0.645629 -2.080395 -1.440357  
H 1.859182 -4.092187 -0.918933  
H 2.556810 -2.800832 0.035388  
H 1.355369 -4.214536 3.349480  
H 2.705285 -3.307657 2.660379  
H 1.020693 -1.786580 3.651329  
H 1.387224 -1.489967 1.989129  
H -1.012378 -3.266331 1.997906  
H -1.304358 -1.850429 3.078605

<sup>45</sup>C-17

Geometry with 83 atoms:

Total energy: -3124.208142490  
Cr -0.051066 -0.270899 1.208436  
P -1.822052 0.049747 -0.641030  
C -3.111783 -1.235160 -0.822164  
C -2.823915 -2.469655 -1.431176  
C -3.775995 -3.492858 -1.434048  
C -5.019080 -3.301189 -0.823949  
C -5.310600 -2.077208 -0.212963  
C -4.364799 -1.049585 -0.209551  
H -4.610278 -0.095909 0.264218  
H -6.282031 -1.918454 0.261755  
H -5.760838 -4.103475 -0.826615  
H -3.542116 -4.445215 -1.916064  
H -1.856551 -2.649568 -1.904758  
C -2.704144 1.663760 -0.775105  
C -2.477695 2.733107 0.122138  
C -3.158857 3.943542 -0.102860  
C -4.040670 4.100688 -1.170746  
C -4.265655 3.037507 -2.051389  
C -3.597516 1.831863 -1.851955  
H -3.777410 1.001601 -2.539876  
H -4.956482 3.148193 -2.890402  
H -4.553201 5.054592 -1.317506  
H -2.989363 4.778605 0.582489  
C -1.602933 2.633688 1.356097  
C -2.377465 2.165346 2.593324  
H -1.717346 2.072692 3.470066  
H -3.171839 2.885675 2.842027  
H -2.865664 1.192338 2.422221  
H -1.153618 3.618391 1.560474  
H -0.732397 1.977201 1.160257  
C -0.809184 0.019857 -2.201387  
C 0.442015 0.888986 -2.019687  
P 1.528714 0.307883 -0.620196  
C 2.722936 1.679199 -0.420219  
C 3.698107 1.918509 -1.403949  
C 4.586737 2.985625 -1.261530  
C 4.512617 3.816100 -0.136994  
C 3.546352 3.580020 0.844903  
C 2.652173 2.513996 0.705908  
H 1.910953 2.327114 1.485958  
H 3.491642 4.222463 1.727023  
H 5.214216 4.646358 -0.024993  
H 5.344976 3.165862 -2.027386  
H 3.773771 1.261482 -2.274212  
C 2.480134 -1.118517 -1.300175  
C 2.247934 -1.566942 -2.615191  
C 2.922527 -2.674912 -3.129305  
C 3.844825 -3.353683 -2.330242  
C 4.088292 -2.909608 -1.031107  
C 3.423856 -1.797108 -0.490078  
C 3.785684 -1.354352 -0.909565  
C 5.134820 -0.626837 0.985624  
H 5.956017 -1.273405 0.637378  
H 5.355702 -0.328775 0.022945  
H 5.135125 0.280733 2.363548  
H 3.814009 -2.240972 1.564936  
H 2.999878 -0.706871 1.316558

H 4.815608 -3.437247 -0.407679  
 H 4.375452 -4.226296 -2.718879  
 H 2.726256 -3.002834 -4.152797  
 H 1.540770 -1.054083 -3.266464  
 H 1.028017 0.959481 -2.948973  
 H 0.162612 1.922343 -1.755483  
 H -0.539198 -1.025798 -2.407091  
 H -1.417169 0.377692 -3.046615  
 C 1.065835 0.012793 2.910227  
 C 0.970769 -1.191765 3.853681  
 C -0.480781 -1.575413 4.178030  
 C -1.409497 -1.689509 2.961533  
 H -1.572848 -0.662530 2.525021  
 H -2.431854 -1.913385 3.306784  
 C -1.025458 -2.724454 1.870034  
 C 0.108498 -2.269549 0.946643  
 H -0.014397 -2.610090 -0.092863  
 H 1.114063 -2.549028 1.292867  
 H -1.923911 -2.922497 1.265272  
 H -0.778728 -3.671519 2.383261  
 H -0.907657 -0.819094 4.860540  
 H -0.506489 -2.533113 4.725770  
 H 1.499037 -0.993541 4.805445  
 H 1.493831 -2.054158 3.405058  
 H 0.553492 0.892252 3.361952  
 H 2.113111 0.312242 2.749140

<sup>45</sup>C-18  
 Geometry with 83 atoms:  
 Total energy: -3124.207071100  
 Cr -0.002189 -0.697004 0.955382  
 P 1.696205 0.224281 -0.625849  
 C 2.268873 1.963831 -0.524619  
 C 3.360794 2.388052 -1.302670

C 3.762819 3.724664 -1.274736  
 C 3.080829 4.647391 -0.472883  
 C 1.993555 4.230910 0.299651  
 C 1.586323 2.893019 0.275772  
 H 0.741527 2.578999 0.889034  
 H 1.460314 4.947328 0.929193  
 H 3.401012 5.691851 -0.449371  
 H 4.615509 4.046408 -1.877635  
 H 3.906951 1.671792 -1.921766  
 C 3.197440 -0.796750 -0.875467  
 C 4.109437 -0.954419 0.197863  
 C 5.221441 -1.788243 0.002289  
 C 5.439656 -2.451402 -1.205855  
 C 4.537209 -2.289509 -2.259659  
 C 3.422242 -1.466793 -2.092966  
 H 2.731795 -1.353619 -2.929855  
 H 4.698186 -2.800984 -3.211583  
 H 6.313663 -3.096529 -1.324029  
 H 5.929911 -1.919339 0.824862  
 C 3.961193 -0.243645 1.528406  
 C 4.947085 0.918096 1.710965  
 H 4.809275 1.392671 2.695546  
 H 5.989605 0.567843 1.647776  
 H 4.804983 1.689232 0.939448  
 H 4.115682 -0.979893 2.334958  
 H 2.932090 0.124549 1.657048  
 C 0.770811 0.217267 -2.248773  
 C -0.549490 0.992145 -2.124753  
 P -1.640970 0.215095 -0.828289  
 C -2.277880 -1.285067 -1.679997  
 C -3.335186 -1.235071 -2.602995  
 C -3.756626 -2.400222 -3.248810  
 C -3.125811 -3.621559 -2.984751  
 C -2.074432 -3.681569 -2.065019  
 C -1.657199 -2.518403 -1.412365  
 H -0.846705 -2.584866 -0.675649  
 H -1.584304 -4.634053 -1.849248  
 H -3.459554 -4.529760 -3.492492  
 H -4.583795 -2.355781 -3.961598  
 H -3.837794 -0.286443 -2.809316  
 C -3.067751 1.334330 -0.591246  
 C -3.193038 2.513806 -1.346323  
 C -4.253800 3.394607 -1.125821  
 C -5.198241 3.099410 -0.142680  
 C -5.083056 1.927372 0.609886  
 C -4.031464 1.022498 0.406708  
 C -3.935143 -0.264627 1.202742

C -4.755835 -0.341945 2.487545  
 H -5.838916 -0.324849 2.289710  
 H -4.522647 0.493155 3.167064  
 H -4.538338 -1.280889 3.020121  
 H -2.873426 -0.4322923 1.451895  
 H -4.207260 -1.106592 0.540276  
 H -5.834365 1.715937 1.371824  
 H -6.031515 3.781851 0.042082  
 H -4.337547 4.306160 -1.722071  
 H -2.465289 2.761218 -2.120472  
 H -0.356152 2.032883 -1.819407  
 H -1.071360 1.016891 -3.093850  
 H 1.404993 0.663393 -3.030485  
 H 0.578062 -0.831014 -2.530654  
 C 0.981666 -2.226243 1.825696  
 C -0.390577 -2.579481 2.335429  
 C -0.645905 -2.435895 3.841107  
 C -0.251030 -1.085035 4.454893  
 H 0.847198 -0.972982 4.459013  
 H -0.552867 -1.102511 5.514732  
 C -0.876678 0.140006 3.768073  
 C -0.159837 0.619180 2.506082  
 H 0.881315 0.913993 2.729836  
 H -0.684147 1.484348 2.059949  
 H -0.882828 0.976415 4.492958  
 H -1.942944 -0.061157 3.555056  
 H -0.095283 -3.244049 4.351410  
 H -1.717317 -2.618935 4.034874  
 H -0.742574 -3.560835 1.975679  
 H -1.190919 -1.904915 1.830899  
 H 1.727752 -1.975721 2.589366  
 H 1.397683 -2.925046 1.083463

<sup>49</sup>A-01  
 Geometry with 77 atoms:

Total energy: -3045.599294980  
 Cr -0.065967 -0.695250 1.052269  
 P 1.730599 0.326419 -0.535891  
 P -1.563454 0.346266 -0.611101  
 C -0.550531 1.045331 -2.024180  
 C 0.840537 0.416648 -2.170112  
 H -1.120216 0.951381 -2.961275  
 H -0.460053 2.122074 -1.814392  
 H 0.773258 -0.618238 -2.539546  
 H 1.439792 0.990622 -2.893654  
 C 3.242023 -0.651951 -0.860711  
 C 3.693200 -0.976126 -2.151405  
 C 3.971841 -1.109254 0.252403  
 C 4.849983 -1.743797 -2.320734  
 H 3.155236 -0.631898 -3.036424  
 C 5.132642 -1.864993 0.079565  
 H 3.630713 -0.874026 1.263576  
 C 5.571809 -2.186993 -1.209210  
 H 5.190119 -1.991444 -3.329221  
 H 5.692010 -2.209278 0.952803  
 H 6.476528 -2.784080 -1.346439  
 C 2.298619 2.050912 -0.251083  
 C 3.618176 2.468465 -0.492467  
 C 1.360417 2.986512 0.226344  
 C 3.986645 3.798106 -0.265791  
 H 4.361983 1.757092 -0.857850  
 C 1.730456 4.316245 0.440541  
 H 0.330862 2.682371 0.431255  
 C 3.046171 4.723590 0.196772  
 H 5.016122 4.112153 -0.455145  
 H 0.990171 5.032826 0.804742  
 H 3.338905 5.761950 0.370242  
 C -2.700350 -0.878320 -1.363008  
 C -3.985251 -1.060084 -0.823314  
 C -2.268882 -1.713478 -2.407403  
 C -4.824426 -2.057326 -1.326746  
 H -4.337611 -0.418544 -0.012709  
 C -3.113488 -2.706722 -2.909325  
 H -1.269702 -1.602780 -2.832963  
 C -4.391421 -2.882264 -2.369275  
 H -5.822893 -2.187274 -0.902265  
 H -2.769605 -3.347415 -3.724962  
 H -5.049769 -3.661015 -2.761729  
 C -2.638270 1.751891 -0.132972  
 C -3.428990 2.399247 -1.100558  
 C -2.662286 2.209257 1.193808

C -4.221254 3.490799 -0.743244  
 H -3.433655 2.044325 -2.134373  
 C -3.458826 3.303665 1.548332  
 H -2.069678 1.706134 1.959137  
 C -4.235889 3.945521 0.581177  
 H -4.833447 3.987270 -1.500074  
 H -3.474364 3.650333 2.584363  
 H -4.859047 4.799409 0.858094  
 C -1.689881 -1.366123 2.166881  
 C -1.392157 -2.497328 3.162051  
 C -1.053997 -3.847365 2.506809  
 C 0.391004 -4.003935 2.013493  
 C 0.927505 -2.873999 1.124919  
 C 0.089396 -2.418490 -0.035958  
 H -2.109686 -0.492429 2.698585  
 H -2.473093 -1.702454 1.465415  
 H -0.578538 -2.212885 3.859643  
 H -2.277755 -2.649309 3.807900  
 H -1.243907 -4.661670 3.225569  
 H -1.756912 -4.017768 1.672595  
 H 0.480780 -4.947367 1.448627  
 H 1.062405 -4.102509 2.884858  
 H 1.110610 -1.993914 1.849191  
 H 1.967317 -3.077397 0.823416  
 H -0.878558 -2.919114 -0.150425  
 H 0.623786 -2.371086 -0.997366  
 H 1.556952 0.314346 3.075657  
 C 0.365030 0.930623 3.160064  
 H 2.370741 0.731878 2.475663  
 H 1.783021 -0.577640 3.668594  
 H -0.419995 0.567437 3.827396  
 H 0.181119 1.874371 2.638051

<sup>49</sup>A-02  
 Geometry with 77 atoms:

Total energy: -3045.599211010  
 Cr -0.052909 -0.733082 1.033011  
 P 1.729698 0.342646 -0.536228  
 P -1.552265 0.322953 -0.616459  
 C -0.545654 1.022439 -2.035177  
 C 0.851631 0.405968 -2.175919  
 H -1.112653 0.913535 -2.971805  
 H -0.463705 2.101486 -1.834517  
 H 0.791495 -0.631100 -2.539454  
 H 1.447751 0.980929 -2.901354  
 C 3.267205 -0.601767 -0.826499  
 C 4.037317 -0.945852 0.301099  
 C 3.691919 -1.021505 -2.097872  
 C 5.211740 -1.686029 0.158543  
 H 3.717374 -0.631734 1.298708  
 C 4.863862 -1.773056 -2.235142  
 H 3.121766 -0.766062 -2.993054  
 C 5.625035 -2.104740 -1.111476  
 H 5.802980 -1.942753 1.040873  
 H 5.183983 -2.096338 -3.228706  
 H 6.540704 -2.690168 -1.223941  
 C 2.251289 2.081698 -0.253881  
 C 1.290979 2.468465 -0.234745  
 C 3.555175 2.538016 -0.510022  
 C 1.624097 4.327801 0.447867  
 H 0.273940 2.650567 0.449378  
 C 3.886971 3.877324 -0.284593  
 H 4.315258 1.848725 -0.884391  
 C 2.924717 4.773660 0.190905  
 H 0.867566 5.021953 0.821933  
 H 4.904611 4.221965 -0.484424  
 H 3.189042 5.819631 0.364391  
 C -2.710938 -0.879648 -1.370367  
 C -4.003561 -1.032542 -0.841541  
 C -2.287521 -1.722803 -2.411618  
 C -4.860522 -2.009564 -1.354827  
 H -4.347771 -0.385867 -0.031369  
 C -3.150254 -2.695055 -2.923549  
 H -1.281702 -1.631986 -2.827098  
 C -4.437135 -2.841436 -2.395709  
 H -5.865560 -2.117815 -0.939854  
 H -2.814257 -3.341888 -3.737634  
 H -5.110104 -3.603263 -2.796509  
 C -2.606082 1.735850 -0.107802  
 C -3.228357 2.550472 -1.072256  
 C -2.802435 2.013181 1.254390



|   |           |           |           |   |           |           |           |   |           |           |           |
|---|-----------|-----------|-----------|---|-----------|-----------|-----------|---|-----------|-----------|-----------|
| C | -4.018535 | 3.630126  | -0.675028 | C | -3.999642 | 3.645154  | -0.697371 | C | -4.175088 | 3.511935  | -0.680052 |
| H | -3.103474 | 2.342023  | -2.137752 | H | -3.120052 | 2.320741  | -2.150753 | H | -3.467185 | 2.042421  | -2.090806 |
| C | -3.598085 | 3.094267  | 1.648534  | C | -3.531513 | 3.156821  | 1.627982  | C | -3.326720 | 3.327402  | 1.581784  |
| H | -2.344834 | 1.377730  | 2.012630  | H | -2.281060 | 1.440228  | 2.002736  | H | -1.950912 | 1.705924  | 1.947085  |
| C | -4.202821 | 3.905265  | 0.685388  | C | -4.153191 | 3.949910  | 0.660603  | C | -4.129039 | 3.976565  | 0.640225  |
| H | -4.496612 | 4.258268  | -1.430623 | H | -4.490148 | 4.260045  | -1.455887 | H | -4.807355 | 4.014558  | -1.416016 |
| H | -3.746035 | 3.299225  | 2.711635  | H | -3.655533 | 3.385444  | 2.689285  | H | -3.295318 | 3.681582  | 2.614923  |
| H | -4.823018 | 4.750966  | 0.992437  | H | -4.762712 | 4.805135  | 0.962609  | H | -4.724880 | 4.844129  | 0.934246  |
| C | -1.665961 | -1.489475 | 2.115773  | C | -1.693904 | -1.459538 | 2.116271  | C | -1.669599 | -1.396047 | 2.161372  |
| C | -1.324300 | -2.623772 | 3.094028  | C | -1.395867 | -2.606553 | 3.093962  | C | -1.383222 | -2.545270 | 3.139729  |
| C | -0.931615 | -3.950570 | 2.423022  | C | -1.033386 | -3.941534 | 2.421649  | C | -1.049210 | -3.888160 | 2.467231  |
| C | 0.518913  | -0.424212 | 1.929866  | C | 0.420842  | -0.407287 | 1.948516  | C | 0.400028  | -0.404788 | 1.986296  |
| C | 1.010606  | -2.876603 | 1.062126  | C | 0.955365  | -2.919869 | 1.088800  | C | 0.947206  | -2.914114 | 1.108758  |
| C | 0.151812  | -2.431828 | -0.088257 | C | 0.124123  | -2.458554 | -0.077184 | C | 0.112408  | -2.458138 | -0.058885 |
| H | -2.130819 | -0.651635 | 2.665496  | H | -2.127002 | -0.603539 | 2.665337  | H | -2.060662 | -0.517301 | 2.707924  |
| H | -2.426483 | -1.845111 | 1.398616  | H | -2.467579 | -1.786990 | 1.399912  | H | -2.470256 | -1.707591 | 1.467825  |
| H | -0.524480 | -2.315898 | 3.797942  | H | -0.594095 | -2.325166 | 3.806504  | H | -0.569612 | -2.278190 | 3.843672  |
| H | -2.204337 | -2.819977 | 3.735580  | H | -2.287839 | -2.779480 | 3.725576  | H | -2.272269 | -2.700917 | 3.779955  |
| H | -1.089325 | -4.780382 | 3.131732  | H | -1.224997 | -4.769559 | 3.124062  | H | -1.251610 | -4.710950 | 3.172763  |
| H | -1.626861 | -4.138842 | 1.586256  | H | -1.721803 | -4.105853 | 1.574236  | H | -1.745360 | -4.042347 | 1.624223  |
| H | 0.645888  | -4.971075 | 1.347942  | H | 0.530377  | -5.004355 | 1.367575  | H | 0.490354  | -4.988194 | 1.416327  |
| H | 1.192973  | -4.130789 | 2.800188  | H | 1.079920  | -4.179751 | 2.828217  | H | 1.062905  | -4.154710 | 2.863138  |
| H | 1.165239  | -2.004176 | 1.803719  | H | 1.117440  | -2.050729 | 1.830391  | H | 1.124977  | -2.036817 | 1.833588  |
| H | 2.056317  | -3.034827 | 0.753673  | H | 2.001065  | -3.106266 | 0.796271  | H | 1.988404  | -3.120367 | 0.811563  |
| H | -0.801365 | -2.959857 | -0.202587 | H | -0.836795 | -2.969282 | -0.206540 | H | -0.853440 | -2.962583 | -0.178028 |
| H | 0.679365  | -2.365411 | -1.048283 | H | 0.668600  | -2.402122 | -1.028763 | H | 0.651745  | -2.414890 | -1.014367 |
| C | 1.389757  | 0.355513  | 3.034921  | C | 0.291825  | 0.845844  | 3.188445  | C | 0.441011  | 0.697996  | 3.392489  |
| C | 0.188048  | 0.953853  | 3.114361  | C | 1.547714  | 0.412548  | 2.982772  | C | 1.695029  | 0.387395  | 3.025465  |
| H | 2.204488  | 0.793853  | 2.451455  | H | -0.385524 | 0.333589  | 3.875949  | H | -0.137606 | 0.059223  | 4.063976  |
| H | 1.626178  | -0.532044 | 3.630852  | H | -0.064127 | 1.780972  | 2.744619  | H | -0.015201 | 1.649099  | 3.098479  |
| H | -0.595045 | 0.571482  | 3.773048  | H | 2.251629  | 0.979952  | 2.367967  | H | 2.295416  | 1.067031  | 2.414344  |
| H | -0.013954 | 1.897334  | 2.598846  | H | 1.935875  | -0.472054 | 3.498332  | H | 2.186282  | -0.521575 | 3.387529  |

#### \*9A-03

Geometry with 77 atoms:

Total energy: -3045.599247120

|    |           |           |           |
|----|-----------|-----------|-----------|
| Cr | -0.063673 | -0.752378 | 1.028234  |
| P  | 1.732002  | 0.305058  | -0.534324 |
| P  | -1.547218 | 0.331731  | -0.625572 |
| C  | -0.529161 | 1.019849  | -2.040418 |
| C  | 0.860517  | 0.386085  | -2.177856 |
| H  | -1.095315 | 0.920360  | -2.978623 |
| H  | -0.433426 | 2.097110  | -1.835695 |
| H  | 0.793239  | -0.649493 | -2.545589 |
| H  | 1.464491  | 0.958597  | -2.898787 |
| C  | 3.284128  | -0.612397 | -0.838401 |
| C  | 4.005283  | -1.059476 | 0.284868  |
| C  | 3.777726  | -0.896157 | -2.123013 |
| C  | 5.199284  | -1.764983 | 0.126892  |
| H  | 3.631463  | -0.857440 | 1.291781  |
| C  | 4.968621  | -1.612930 | -2.277403 |
| H  | 3.244958  | -0.560362 | -3.014352 |
| C  | 5.681763  | -2.045520 | -1.156138 |
| H  | 5.751604  | -2.102328 | 1.007294  |
| H  | 5.341989  | -1.829329 | -3.281300 |
| H  | 6.613202  | -2.602864 | -1.281305 |
| C  | 2.229212  | 2.047185  | -0.227117 |
| C  | 1.264508  | 2.921326  | 0.308708  |
| C  | 3.516622  | 2.535163  | -0.505397 |
| C  | 1.575181  | 4.262512  | 0.543697  |
| H  | 0.261889  | 2.554946  | 0.543490  |
| C  | 3.826721  | 3.876053  | -0.258402 |
| H  | 4.280764  | 1.869163  | -0.912577 |
| C  | 2.858941  | 4.741267  | 0.261686  |
| H  | 0.814843  | 4.931958  | 0.953390  |
| H  | 4.831592  | 4.246556  | -0.475739 |
| H  | 3.106206  | 5.788586  | 0.451479  |
| C  | -2.712962 | -0.862348 | -1.381890 |
| C  | -4.010901 | -1.001230 | -0.862150 |
| C  | -2.288444 | -1.716285 | -2.413978 |
| C  | -4.871453 | -1.975368 | -1.375090 |
| H  | -4.356208 | -0.346315 | -0.059095 |
| C  | -3.154598 | -2.685642 | -2.925425 |
| H  | -1.278779 | -1.637033 | -2.822139 |
| C  | -4.446493 | -2.818378 | -2.406315 |
| H  | -5.880399 | -2.073011 | -0.967055 |
| H  | -2.817099 | -3.341237 | -3.731845 |
| H  | -5.122006 | -3.578378 | -2.806313 |
| C  | -2.586359 | 1.755095  | -0.119440 |
| C  | -3.223806 | 2.552860  | -1.087873 |
| C  | -2.750402 | 2.062766  | 1.240375  |

#### \*9A-04

Geometry with 77 atoms:

Total energy: -3045.598675410

|    |           |           |           |
|----|-----------|-----------|-----------|
| Cr | -0.057015 | -0.740940 | 1.022726  |
| P  | 1.730676  | 0.307108  | -0.550600 |
| P  | -1.556910 | 0.331177  | -0.621281 |
| C  | -0.541210 | 1.022544  | -2.035314 |
| C  | 0.840719  | 0.374657  | -2.184663 |
| H  | -1.115349 | 0.941847  | -2.970854 |
| H  | -0.433795 | 2.096171  | -1.816010 |
| H  | 0.758596  | -0.663511 | -2.540644 |
| H  | 1.444105  | 0.932851  | -2.917420 |
| C  | 3.280717  | -0.609323 | -0.865492 |
| C  | 3.657193  | -1.082816 | -2.133452 |
| C  | 4.107514  | -0.885344 | 0.240567  |
| C  | 4.837822  | -1.817469 | -2.288159 |
| H  | 3.043049  | -0.883629 | -3.013455 |
| C  | 5.288758  | -1.610395 | 0.080081  |
| H  | 3.829337  | -0.525883 | 1.234577  |
| C  | 5.654562  | -2.081653 | -1.186042 |
| H  | 5.120060  | -2.181717 | -3.278989 |
| H  | 5.923552  | -1.812965 | 0.946061  |
| H  | 6.576301  | -2.654635 | -1.312131 |
| C  | 2.212980  | 2.056078  | -0.267176 |
| C  | 3.455532  | 2.581381  | -0.658441 |
| C  | 1.270666  | 2.902636  | 0.346353  |
| C  | 3.743711  | 3.932398  | -0.443641 |
| H  | 4.201349  | 1.936279  | -1.128684 |
| C  | 1.558344  | 4.254372  | 0.549018  |
| H  | 0.302071  | 2.508778  | 0.666033  |
| C  | 2.797433  | 4.770368  | 0.155652  |
| H  | 4.713538  | 4.333082  | -0.748878 |
| H  | 0.814760  | 4.902655  | 1.019050  |
| H  | 3.027326  | 5.826030  | 0.319285  |
| C  | -2.715641 | -0.875845 | -1.365981 |
| C  | -3.998809 | -1.041344 | -0.816719 |
| C  | -2.302091 | -1.716222 | -2.413440 |
| C  | -4.854422 | -2.027190 | -1.314783 |
| H  | -4.336930 | -0.395977 | -0.003049 |
| C  | -3.163163 | -2.698145 | -2.909687 |
| H  | -1.304632 | -1.617921 | -2.846044 |
| C  | -4.439545 | -2.856978 | -2.360845 |
| H  | -5.851446 | -2.144563 | -0.883308 |
| H  | -2.833584 | -3.342958 | -3.727970 |
| H  | -5.110895 | -3.626669 | -2.749123 |
| C  | -2.601456 | 1.749348  | -0.118918 |
| C  | -3.417193 | 2.403595  | -1.060301 |
| C  | -2.565879 | 2.215915  | 1.203976  |

#### \*9A-05

Geometry with 77 atoms:

Total energy: -3045.599083050

|    |           |           |           |
|----|-----------|-----------|-----------|
| Cr | -0.061526 | -0.733049 | 1.045898  |
| P  | 1.739640  | 0.354186  | -0.518317 |
| P  | -1.560123 | 0.350077  | -0.589370 |
| C  | -0.548011 | 1.061054  | -1.998377 |
| C  | 0.841679  | 0.431217  | -2.149922 |
| H  | -1.118562 | 0.972473  | -2.935281 |
| H  | -0.456709 | 2.136325  | -1.782268 |
| H  | 0.765666  | -0.603836 | -2.515120 |
| H  | 1.441354  | 0.998778  | -2.878411 |
| C  | 3.258059  | -0.616474 | -0.838034 |
| C  | 3.591759  | -1.144948 | -2.096152 |
| C  | 4.103134  | -0.880114 | 0.257109  |
| C  | 4.742878  | -1.925242 | -2.250296 |
| H  | 2.967489  | -0.953436 | -2.970356 |
| C  | 5.255455  | -1.650557 | 0.097679  |
| H  | 3.866984  | -0.470671 | 1.242749  |
| C  | 5.575022  | -2.180295 | -1.157759 |
| H  | 4.990164  | -2.331830 | -3.233943 |
| H  | 5.903966  | -1.841733 | 0.956014  |
| H  | 6.473415  | -2.789316 | -1.283213 |
| C  | 2.295749  | 2.088402  | -0.260404 |
| C  | 3.603301  | 2.518666  | -0.542067 |
| C  | 1.357302  | 3.021740  | 0.221144  |
| C  | 3.960972  | 3.855881  | -0.345626 |
| H  | 4.347084  | 1.811350  | -0.915059 |
| C  | 1.716129  | 4.359357  | 0.404717  |
| H  | 0.335333  | 2.710795  | 0.450961  |
| C  | 3.020931  | 4.777851  | 0.124890  |
| H  | 4.981702  | 4.178631  | -0.565341 |
| H  | 0.975370  | 5.073206  | 0.773272  |
| H  | 3.305351  | 5.822098  | 0.275339  |
| C  | -2.715612 | -0.847063 | -1.358059 |
| C  | -3.998567 | -1.024355 | -0.812407 |
| C  | -2.303365 | -1.663511 | -2.424727 |
| C  | -4.855320 | -1.997763 | -1.332510 |
| H  | -4.335939 | -0.397217 | 0.015739  |
| C  | -3.165601 | -2.632817 | -2.943392 |
| H  | -1.306212 | -1.556267 | -2.856104 |
| C  | -4.441902 | -2.803241 | -2.397953 |
| H  | -5.852317 | -2.123994 | -0.903463 |
| H  | -2.837101 | -3.258347 | -3.776969 |
| H  | -5.114397 | -3.562635 | -2.804126 |
| C  | -2.619294 | 1.758445  | -0.085356 |
| C  | -3.386190 | 2.449203  | -1.042014 |
| C  | -2.656486 | 2.171275  | 1.255062  |

C -4.166298 3.540934 -0.659455  
H -3.381535 2.128531 -2.086906  
C -3.440945 3.265674 1.635404  
H -2.081596 1.632070 2.008434  
C -4.193189 3.951829 0.679126  
H -4.759607 4.072058 -1.407757  
H -3.466145 3.578037 2.682128  
H -4.806642 4.806299 0.975301  
C -1.672239 -1.456870 2.143675  
C -1.353726 -2.619619 3.094882  
C -1.000009 -3.941326 2.391908  
C 0.445122 -4.061556 1.887799  
C 0.959285 -2.898305 1.028926  
C 0.099742 -2.416742 -0.103860  
H -2.084349 -0.603309 2.712870  
H -2.464772 -1.770545 1.442305  
H -0.541247 -2.347204 3.797709  
H -2.233962 -2.806501 3.738964  
H -1.175416 -4.782057 3.083381  
H -1.704782 -4.093112 1.555653  
H 0.545778 -4.986665 1.295145  
H 1.122307 -4.175994 2.752666  
H 1.143593 -2.040183 1.779851  
H 1.998210 -3.078107 0.707967  
H -0.864723 -2.923360 -0.219536  
H 0.618847 -2.336207 -1.067242  
C 0.341417 0.926232 3.118863  
C 1.365395 0.062001 3.228388  
H -0.584065 0.781449 3.681202  
H 0.442175 1.851009 2.544007  
H 2.324898 0.251512 2.738974  
H 1.304810 -0.817591 3.877010

C -4.394948 2.650137 -1.907018  
H -2.384606 2.157487 -2.479969  
C -5.406326 1.264631 -0.200928  
H -4.186619 -0.330845 0.579709  
C -5.487591 2.338962 -1.093760  
H -4.454448 3.483569 -2.611284  
H -6.258483 1.013716 0.435226  
H -6.403759 2.931002 -1.156680  
C -1.802382 0.954410 2.395316  
C -1.571034 1.402600 3.843814  
C -0.921186 0.354779 4.759415  
C 0.593102 0.180592 4.584360  
C 1.077907 -0.084230 3.151641  
C 0.345545 -1.115541 2.340812  
H -2.340143 1.741257 1.834547  
H -2.453667 0.061703 2.387006  
H -0.968775 2.330949 3.878413  
H -2.545615 1.681121 4.288318  
H -1.100780 0.628278 5.812392  
H -1.432944 -0.612555 4.613924  
H 0.935253 -0.661950 5.209022  
H 1.109324 1.078182 4.968132  
H 1.028675 0.948623 2.625340  
H 2.168853 -0.242457 3.134513  
H -0.499921 -1.594669 2.847762  
H 0.996431 -1.851068 1.855359  
C 0.369822 3.154437 1.222744  
C -0.232262 2.958534 0.036455  
H 1.460559 3.176275 1.304993  
H -0.203249 3.384891 2.124576  
H -1.319108 3.020561 -0.070490  
H 0.357215 2.818174 -0.874614

C -3.116939 3.855186 0.586288  
H -1.571125 3.254062 -0.777195  
C -4.401256 2.084048 1.617063  
H -3.863639 0.071649 1.067542  
C -4.136582 3.448400 1.449906  
H -2.913924 4.918687 0.438019  
H -5.205264 1.757963 2.281241  
H -4.730923 4.192371 1.985730  
C -1.599798 -1.760025 1.987997  
C -1.197245 -2.700467 3.132824  
C -0.472229 -3.983271 2.693565  
C 1.017758 -3.823921 2.358802  
C 1.371802 -2.685404 1.392220  
C 0.577901 -2.562158 0.119014  
H -2.252541 -0.958630 2.375213  
H -2.196462 -2.315182 1.241966  
H -0.577175 -2.167720 3.881741  
H -2.107889 -3.002786 3.684280  
H -0.549979 -4.739115 3.492505  
H -1.009436 -4.411613 1.829038  
H 1.394057 -4.764801 1.922529  
H 1.584758 -3.670481 3.293918  
H 1.265430 -1.727669 2.028286  
H 2.456512 -2.657524 1.201917  
H -0.219106 -3.306787 0.013953  
H 1.183704 -2.510746 -0.795617  
C -0.393978 1.056602 2.961864  
C 0.903182 0.709862 3.033799  
H -0.743683 1.879762 2.331452  
H -1.147858 0.573160 3.587562  
H 1.245420 -0.057030 3.736054  
H 1.674224 1.244022 2.470834

\*9A-06

Geometry with 77 atoms:  
Total energy: -3045.597799740  
Cr -0.150046 0.506745 1.220421  
P 1.731133 -0.062239 -0.631842  
P -1.600106 -0.158884 -0.704718  
C -0.586695 0.097984 -2.246482  
C 0.756893 -0.628032 -2.120664  
H -1.153724 -0.267370 -3.117134  
H -0.432773 1.179779 -2.380053  
H 0.595393 -1.708457 -1.983252  
H 1.360467 -0.524979 -3.034944  
C 2.947516 -1.423979 -0.402848  
C 2.450221 -2.722572 -0.175429  
C 4.336866 -1.219327 -0.408332  
C 3.325117 -3.789550 0.037239  
H 1.373852 -2.913757 -0.172262  
C 5.208258 -2.291009 -0.188436  
H 4.750519 -0.226790 -0.594278  
C 4.707387 -3.575918 0.035747  
H 2.923562 -4.791854 0.205444  
H 6.287080 -2.117240 -0.200184  
H 5.391843 -4.410546 0.205405  
C 2.695442 1.399772 -1.177119  
C 3.458584 2.072514 -0.202710  
C 2.656610 1.915394 -2.482647  
C 4.181662 3.220305 -0.532634  
H 3.497277 1.689739 0.821445  
C 3.368487 3.075540 -2.806137  
H 2.074442 1.421200 -3.262544  
C 4.133309 3.727869 -1.835805  
H 4.779636 3.723433 0.231113  
H 3.328129 3.466122 -3.825876  
H 4.691597 4.631061 -2.093346  
C -2.128514 -1.909630 -0.850758  
C -1.622459 -2.881149 0.026398  
C -3.010892 -2.295458 -1.876828  
C -1.986880 -4.223583 -0.124366  
H -0.950216 -2.588603 0.831722  
C -3.372295 -3.635507 -2.021902  
H -3.425874 -1.548073 -2.557810  
C -2.859698 -4.601654 -1.147235  
H -1.590709 -4.972258 0.565947  
H -4.060206 -3.927925 -2.818927  
H -3.147558 -5.649535 -1.262265  
C -3.132301 0.814881 -0.934539  
C -3.220686 1.893948 -1.830166  
C -4.236782 0.507978 -0.118214

\*9A-07

Geometry with 77 atoms:  
Total energy: -3045.597897370  
Cr -0.046234 -0.820466 0.988033  
P 1.710901 0.345820 -0.560937  
P -1.581232 0.207391 -0.680292  
C -0.565120 0.998063 -2.038588  
C 0.804533 0.323952 -2.187776  
H -1.135234 0.946174 -2.977988  
H -0.431719 2.062781 -1.799798  
H 0.690711 -0.731812 -2.481018  
H 1.401134 0.829490 -2.963020  
C 3.290207 -0.528778 -0.841746  
C 3.609709 -1.176674 -2.045789  
C 4.196854 -0.595348 0.233970  
C 4.815749 -1.875548 -2.170156  
H 2.929224 -1.143143 -2.898689  
C 5.402550 -1.285072 0.101995  
H 3.964500 -0.097199 1.179906  
C 5.712809 -1.930431 -1.100917  
H 5.054380 -2.376016 -3.111791  
H 6.101456 -1.322414 0.941191  
H 6.654641 -2.474802 -1.203104  
C 2.163899 2.114478 -0.360172  
C 3.368055 2.657502 -0.839752  
C 1.236548 2.958672 0.275231  
C 3.631892 4.022119 -0.684684  
H 4.102976 2.015702 -1.330882  
C 1.498110 4.323356 0.419700  
H 0.299176 2.547961 0.654374  
C 2.699597 4.855696 -0.057960  
H 4.572101 4.435240 -1.057240  
H 0.765600 4.967427 0.912665  
H 2.912426 5.920877 0.061159  
C -2.776041 -0.860230 -1.573589  
C -2.491285 -2.223533 -1.750898  
C -3.945614 -0.318636 -2.137037  
C -3.362885 -3.034357 -2.484054  
H -1.591164 -2.653327 -1.313313  
C -4.814072 -1.134412 -2.864880  
H -4.185620 0.738613 -2.003182  
C -4.524895 -2.492496 -3.039578  
H -3.134200 -4.094889 -2.614424  
H -5.722427 -0.707125 -3.296710  
H -5.208793 -3.128371 -3.607124  
C -2.605164 1.534565 0.069191  
C -2.354178 2.905439 -0.102942  
C -3.642155 1.133120 0.934415

\*9A-08

Geometry with 77 atoms:  
Total energy: -3045.596768370  
Cr -0.092301 -0.428285 1.236712  
P 1.732824 0.289398 -0.591181  
P -1.634222 0.154776 -0.641695  
C -0.604462 0.996111 -1.945148  
C 0.720770 0.249888 -2.164699  
H -1.180832 1.047755 -2.881594  
H -0.415950 2.028241 -1.613436  
H 0.533847 -0.811880 -2.376344  
H 1.282025 0.664525 -2.997916  
C 3.162024 -0.820820 -0.906342  
C 3.404650 -1.425556 -2.150947  
C 4.036023 -1.088258 -2.163412  
C 4.499342 -2.280034 -2.317284  
H 2.752488 -1.236070 -3.004988  
C 5.133624 -1.933362 -0.093940  
H 3.864074 -0.629788 1.140527  
C 5.364911 -2.535294 -1.250607  
H 4.677205 -2.744203 -3.290528  
H 5.806621 -2.127575 0.829283  
H 6.219685 -3.202290 -1.385587  
C 2.462433 1.982468 -0.534589  
C 2.306504 2.934819 -1.555673  
C 3.182641 2.341822 0.619837  
C 2.853778 4.215244 -1.419496  
H 1.764908 2.694576 -2.472211  
C 3.738867 3.615558 0.748284  
H 3.320974 1.616876 1.425995  
C 3.569788 4.559234 -0.270355  
H 2.723191 4.944797 -2.222684  
H 4.301064 3.874109 1.648922  
H 3.996382 5.559892 -0.168128  
C -2.477742 -1.178040 -1.582826  
C -1.909764 -2.461177 -1.640066  
C -3.648759 -0.909315 -2.315454  
C -2.500738 -3.459265 -2.421055  
H -1.010203 -2.686700 -1.069691  
C -4.237420 -1.911793 -3.088745  
H -4.107836 0.081033 -2.279975  
C -3.665004 -3.187526 -3.143986  
H -2.051436 -4.454678 -2.456289  
H -5.149301 -1.694892 -3.650574  
H -4.130119 -3.970116 -3.748436  
C -2.963501 1.336791 -0.204395  
C -4.017290 0.864807 0.601563  
C -2.944172 2.689594 -0.582187

C -5.028049 1.731041 1.020163  
 H -4.051633 -0.185163 0.899280  
 C -3.958725 3.553914 -0.157348  
 H -2.146358 3.087073 -1.211455  
 C -4.999311 3.078926 0.644919  
 H -5.841564 1.351228 1.642879  
 H -3.934771 4.603295 -0.460853  
 H -5.790258 3.756654 0.974947  
 C -1.662826 -0.907383 2.500137  
 C -1.343493 -1.563340 3.849970  
 C -0.711056 -2.960435 3.760622  
 C 0.787875 -2.974820 3.433390  
 C 1.209431 -2.159140 2.203524  
 C 0.442084 -2.366370 0.926943  
 H -2.189433 0.050975 2.662311  
 H -2.351804 -1.559299 1.932423  
 H -0.691128 -0.910076 4.462142  
 H -2.280916 -1.652611 4.431363  
 H -0.845017 -3.486518 4.720255  
 H -1.267459 -3.556231 3.016120  
 H 1.116863 -4.015184 3.270561  
 H 1.353071 -2.604922 4.307024  
 H 1.131826 -1.055130 2.548836  
 H 2.296240 -2.233580 2.042850  
 H -0.396047 -3.068527 1.003071  
 H 1.068976 -2.585884 0.052265  
 C 0.424987 1.612733 2.870789  
 C -0.283485 2.187619 1.882296  
 H 1.518910 1.624520 2.870531  
 H -0.065538 1.193788 3.754078  
 H -1.373677 2.254839 1.926364  
 H 0.215497 2.681513 1.042663

\*9A-09

Geometry with 77 atoms:

Total energy: -3045.596099180  
 Cr -0.248264 0.094946 1.357145  
 P 1.796837 0.023565 -0.464812  
 P -1.581303 -0.066714 -0.754022  
 C -0.447870 0.440104 -2.138762  
 C 0.883340 -0.315432 -2.054210  
 H -0.951290 0.253477 -3.100452  
 H -0.288952 1.524812 -2.050013  
 H 0.712809 -1.404635 -2.068796  
 H 1.523995 -0.088789 -2.920385  
 C 3.205584 -1.156765 -0.555830  
 C 4.102620 -1.095225 -1.638279  
 C 3.405638 -2.119597 0.445016  
 C 5.167899 -1.992322 -1.722528  
 H 3.979017 -0.332767 -2.411766  
 C 4.476833 -3.015959 0.359601  
 H 2.731143 -2.174726 1.299476  
 C 5.355660 -2.955956 -0.724112  
 H 5.859289 -1.935872 -2.566972  
 H 4.623580 -3.760580 1.145777  
 H 6.192658 -3.655473 -0.790024  
 C 2.634477 1.643047 -0.728791  
 C 2.463213 2.448902 -1.866217  
 C 3.474046 2.098896 0.305370  
 C 3.107985 3.688069 -1.959601  
 H 1.836109 2.123341 -2.698024  
 C 4.122559 3.330606 0.205820  
 H 3.635319 1.475980 1.190569  
 C 3.935055 4.132663 -0.925810  
 H 2.965378 4.304000 -2.851017  
 H 4.776855 3.666565 1.014025  
 H 4.438060 5.099513 -1.002529  
 C -2.210628 -1.699658 -1.312134  
 C -3.230542 -1.775851 -2.278748  
 C -1.624407 -2.882975 -0.835652  
 C -3.654104 -3.018034 -2.754407  
 H -3.701517 -0.865349 -2.656262  
 C -2.049287 -4.124431 -1.319450  
 H -0.840328 -2.838350 -0.081807  
 C -3.064406 -4.194038 -2.276669  
 H -4.450042 -3.067990 -3.501558  
 H -1.586539 -5.038871 -0.940560  
 H -3.399844 -5.164677 -2.650117  
 C -3.027892 1.050269 -0.857316  
 C -3.011685 2.255521 -1.579034  
 C -4.180974 0.703301 -0.128126

C -4.128964 3.097167 -1.569116  
 H -2.137240 2.552616 -2.160356  
 C -5.293584 1.545205 -0.124123  
 H -4.214206 -0.233711 0.431701  
 C -5.269188 2.746012 -0.842083  
 H -4.106846 4.029696 -2.138220  
 H -6.183688 1.261746 0.442671  
 H -6.140475 3.405403 -0.837368  
 C -1.966768 0.299272 2.501965  
 C -1.831951 0.314201 4.029785  
 C -1.336841 -0.998923 4.653152  
 C 0.172429 -1.246730 4.538956  
 C 0.768907 -1.111069 3.130679  
 C 0.067044 -1.807819 1.998244  
 H -2.428380 1.240804 2.154546  
 H -2.650288 -0.516187 2.205444  
 H -1.176080 1.142513 4.361853  
 H -2.821691 0.544244 4.468133  
 H -1.593069 -1.015263 5.725440  
 H -1.894652 -1.838551 4.202937  
 H 0.402523 -2.263564 4.899774  
 H 0.706439 -0.552275 5.211034  
 H 0.811921 0.030794 2.937840  
 H 1.849745 -1.327661 3.153967  
 H -0.847859 -2.344865 2.271985  
 H 0.713181 -2.426139 1.363748  
 C 0.351447 2.593772 2.003274  
 C -0.317257 2.741466 0.844663  
 H 1.444982 2.564427 2.024938  
 H -0.168612 2.590573 2.965430  
 H -1.404012 2.860127 0.818188  
 H 0.217623 2.838064 -0.105404

\*9A-10

Geometry with 77 atoms:

Total energy: -3045.595496660  
 Cr -0.284083 -0.149904 1.293143  
 P 1.829753 0.014533 -0.444972  
 P -1.535846 0.261935 -0.808559  
 C -0.334105 0.802202 -2.111318  
 C 0.974053 0.021052 -2.102360  
 H -0.819209 0.793996 -3.099530  
 H -0.151324 1.882109 -1.889183  
 H 0.786212 -1.041682 -2.324121  
 H 1.667233 0.386077 -2.877030  
 C 3.177050 -1.208367 -0.721965  
 C 4.276830 -0.884439 -1.537984  
 C 3.101697 -2.488834 -0.151675  
 C 5.276717 -1.828025 -1.779041  
 H 4.359343 0.112012 -1.978879  
 C 4.105423 -3.432017 -0.395580  
 H 2.258542 -2.758711 0.483473  
 C 5.193026 -3.103408 -1.208372  
 H 6.127367 -1.565634 -2.412959  
 H 4.035719 -4.425277 0.054494  
 H 5.978945 -3.839099 -1.396116  
 C 2.750980 1.605647 -0.361036  
 C 3.652421 1.768710 0.708626  
 C 2.570731 2.668800 -1.260828  
 C 4.347793 2.966304 0.878128  
 H 3.828092 0.943482 1.405204  
 C 3.264380 3.872177 -1.084190  
 H 1.898575 2.576700 -2.115171  
 C 4.149509 4.025763 -0.014991  
 H 5.048939 3.073310 1.709376  
 H 3.114362 4.689582 -1.793827  
 H 4.689768 4.965762 0.120027  
 C -2.345301 -1.246113 -1.468788  
 C -3.252230 -1.937948 -0.643404  
 C -2.081050 -1.746009 -2.754714  
 C -3.884153 -3.095961 -1.098268  
 H -3.473862 -1.567149 0.358445  
 C -2.707023 -2.914246 -3.201890  
 H -1.389426 -1.235936 -3.426730  
 C -3.608994 -3.590650 -2.377623  
 H -4.591239 -3.616189 -0.447711  
 H -2.488701 -3.292102 -4.203633  
 H -4.098768 -4.501300 -2.730773  
 C -2.809823 1.583991 -0.813085  
 C -4.160677 1.340338 -1.105560  
 C -2.406131 2.888771 -0.473445

C -5.089314 2.385152 -1.054572  
 H -4.497605 0.339058 -1.378524  
 C -3.335288 3.292226 -0.430757  
 H -1.358246 3.103328 -0.251248  
 C -4.681812 3.677829 -0.716575  
 H -6.138360 2.183538 -1.284652  
 H -3.007682 4.939010 -0.171511  
 H -5.411124 4.490580 -0.677778  
 C -1.990490 0.026010 2.460739  
 C -1.962912 -0.565759 3.875887  
 C -1.810470 -2.093561 3.937153  
 C -0.379259 -2.612181 3.745731  
 C 0.356273 -2.100602 2.498785  
 C -0.368935 -2.173833 1.185871  
 H -2.182383 1.113745 2.505854  
 H -2.842572 -0.407759 1.909767  
 H -1.164695 -0.100540 4.485483  
 H -2.904796 -0.296876 4.390712  
 H -2.165112 -2.458982 4.915056  
 H -2.482253 -2.550408 3.189249  
 H -0.394665 -3.714128 3.693707  
 H 0.221295 -2.352900 4.635271  
 H 0.624501 -0.999239 2.744338  
 H 1.371117 -2.527846 2.453177  
 H -1.385971 -2.576183 1.232927  
 H 0.184600 -2.619640 3.948909  
 C 0.857705 1.678457 2.917668  
 C 0.288968 2.424170 1.954154  
 H 1.908244 1.379154 2.857330  
 H 0.316739 1.415593 3.831113  
 H -0.737100 2.788744 2.049922  
 H 0.861338 2.758506 1.083831

\*9A-11

Geometry with 77 atoms:

Total energy: -3045.595498210  
 Cr -0.163361 -0.225329 1.258949  
 P 1.772346 0.199726 -0.541695  
 P -1.584821 0.282629 -0.704121  
 C -0.476765 1.056434 -1.975712  
 C 0.817949 0.247478 -2.134996  
 H -1.004417 1.171130 -2.934290  
 H -0.254857 2.073865 -1.621627  
 H 0.588226 -0.798944 -2.390840  
 H 1.434199 0.648966 -2.953527  
 C 3.079970 -1.064365 -0.796233  
 C 3.383863 -1.611205 -2.054346  
 C 3.803179 -1.500386 0.328629  
 C 4.388824 -2.575346 -2.178801  
 H 2.847895 -1.291962 -2.950089  
 C 4.814437 -2.454455 -0.199178  
 H 3.574627 -1.094016 1.316647  
 C 5.106444 -2.997189 -1.056021  
 H 4.614178 -2.995106 -3.162236  
 H 5.369699 -2.780376 1.082099  
 H 5.892091 -3.749724 -1.158393  
 C 2.688999 1.799801 -0.479509  
 C 2.567648 2.802110 -1.456112  
 C 3.512055 2.040530 0.637231  
 C 3.250684 4.015456 -1.316100  
 H 1.948506 2.652124 -2.341877  
 C 4.200424 3.247535 0.769358  
 H 3.628309 1.276089 1.410601  
 C 4.067022 4.241948 -0.205700  
 H 3.147051 4.783934 -2.086263  
 H 4.840792 3.413885 1.638939  
 H 4.600386 5.189582 -0.099962  
 C -2.333841 -1.176745 -1.531297  
 C -2.933241 -2.174253 -0.741596  
 C -2.347669 -1.315873 -2.929639  
 C -3.540482 -3.281364 -1.338243  
 H -2.929885 -2.085295 0.345026  
 C -2.944466 -2.432036 -3.522294  
 H -1.900147 -0.557765 -3.573916  
 C -3.543207 -3.415329 -2.729748  
 H -4.007407 -4.044760 -0.711367  
 H -2.944555 -2.529363 -4.610624  
 H -4.011619 -4.285161 -3.196526  
 C -2.962772 1.474800 -0.464444  
 C -4.238236 1.007069 -0.102940  
 C -2.745234 2.862015 -0.549291

C -5.272307 1.907977 0.162281  
 H -4.436779 -0.063799 -0.036165  
 C -3.784195 3.758773 -0.286295  
 H -1.766603 3.261803 -0.820473  
 C -5.049551 3.284954 0.071592  
 H -6.259097 1.528264 0.437834  
 H -3.601247 4.833335 -0.363822  
 H -5.860687 3.987484 0.277144  
 C -1.794675 -0.381956 2.532298  
 C -1.539970 -1.059804 3.885340  
 C -1.203181 -2.557048 3.796402  
 C 0.257500 -2.881402 3.455371  
 C 0.840657 -2.179946 2.221200  
 C 0.042854 -2.221611 0.945036  
 H -2.145901 0.656052 2.679929  
 H -2.617927 -0.909394 2.018945  
 H -0.736891 -0.539837 4.444281  
 H -2.442297 -0.949340 4.516310  
 H -1.430514 -3.043553 4.759321  
 H -1.877478 -3.029751 3.060451  
 H 0.358526 -3.968524 3.296342  
 H 0.892739 -2.637013 4.324999  
 H 1.025488 -1.085382 2.544869  
 H 1.882141 -2.499524 2.062526  
 H -0.895984 -2.781457 1.005249  
 H 0.613450 -2.515457 0.053443  
 C 0.603265 1.837292 2.707972  
 C -0.070594 2.409145 1.693648  
 H 1.692774 1.743564 2.680762  
 H 0.097962 1.528786 3.628259  
 H -1.148567 2.584102 1.745753  
 H 0.459280 2.797095 0.817533

C -5.173455 2.411918 -0.409987  
 H -4.596458 0.410416 -0.961358  
 C -3.381855 3.929056 0.170932  
 H -1.389745 3.123954 0.094892  
 C -4.747280 3.679367 -0.005758  
 H -6.237861 2.211923 -0.555347  
 H -3.039549 4.919063 0.482335  
 H -5.476586 4.473877 0.169359  
 C -1.775318 -0.349670 2.535334  
 C -1.617971 -1.171516 3.820778  
 C -1.436957 -2.680951 3.593643  
 C -0.012102 -3.115369 3.226712  
 C 0.642312 -2.379574 2.049579  
 C -0.136038 -2.255957 0.771949  
 H -1.975767 0.710118 2.779372  
 H -2.669628 -0.706055 1.996229  
 H -0.775458 -0.794804 4.433165  
 H -2.515097 -1.024251 4.451608  
 H -1.722556 -3.228741 4.506851  
 H -2.146349 -3.011985 2.814672  
 H -0.011258 -4.191815 2.984753  
 H 0.637717 -2.997958 4.111810  
 H 0.908432 -1.326157 2.454603  
 H 1.656427 -2.771220 1.876343  
 H -1.128701 -2.717949 0.777969  
 H 0.419773 -2.521843 -0.137723  
 C 1.014245 1.421623 2.936031  
 C 0.348299 2.238160 2.100039  
 H 2.073112 1.192131 2.779184  
 H 0.547889 1.030282 3.845285  
 H -0.684906 2.534786 2.297803  
 H 0.847504 2.697482 1.241257

C -2.559792 3.981419 1.296712  
 H -1.005831 2.489031 1.377267  
 C -4.340513 3.575832 -0.293027  
 H -4.186009 1.775126 -1.469941  
 C -3.762086 4.373548 0.699435  
 H -2.101186 4.602135 2.002733  
 H -5.276809 3.882770 -0.765490  
 H -4.248683 5.302217 1.007317  
 C -1.911608 -1.287404 2.108419  
 C -1.764686 -2.419668 3.134401  
 C -1.418519 -3.785164 2.520921  
 C 0.053676 -3.977152 2.135769  
 C 0.681376 -2.868521 1.280032  
 C -0.054417 -2.408710 0.047599  
 H -2.361570 -0.394362 2.578658  
 H -2.618895 -1.619056 1.331323  
 H -1.018739 -2.169911 3.914111  
 H -2.720301 -2.528485 3.681671  
 H -1.680460 -4.585951 3.232280  
 H -2.062940 -3.948071 1.639314  
 H 0.163293 -4.925418 1.582570  
 H 0.657347 -4.085850 3.054260  
 H 0.838862 -1.982413 2.009244  
 H 1.729210 -3.115381 1.053156  
 H -1.030276 -2.878556 -0.124342  
 H 0.549939 -2.423375 -0.869672  
 C 1.121935 0.996027 2.787700  
 C -0.020533 0.698349 3.428776  
 H 2.029162 0.399880 2.927264  
 H 1.223434 1.893743 2.172026  
 H -0.902692 1.339659 3.561687  
 H -0.094815 -0.155105 4.107694

<sup>99</sup>A-12

Geometry with 77 atoms:

Total energy: -3045.596109240  
 Cr -0.155978 -0.277633 1.236700  
 P 1.762677 0.184494 -0.570980  
 P -1.594140 0.336444 -0.692390  
 C -0.500958 1.047416 -2.017366  
 C 0.817457 0.277878 -2.170411  
 H -1.050321 1.102233 -2.969470  
 H -0.320051 2.088802 -1.713022  
 H 0.621574 -0.765477 -2.463386  
 H 1.438631 0.725428 -2.961885  
 C 3.048720 -1.095025 -0.852583  
 C 3.666656 -1.669842 0.271892  
 C 3.445475 -1.511255 -2.135066  
 C 4.664261 -2.636119 0.120450  
 H 3.367905 -1.362057 1.276455  
 C 4.435348 -2.486680 -2.283346  
 H 2.993093 -1.078486 -3.029296  
 C 5.046749 -3.049735 -1.158884  
 H 5.137700 -3.071583 1.003730  
 H 4.733401 -2.804658 -3.285479  
 H 5.821032 -3.811236 -1.279894  
 C 2.715250 1.760521 -0.475073  
 C 2.441973 2.873610 -1.287527  
 C 3.709232 1.873287 0.514906  
 C 3.142653 4.071718 -1.107845  
 H 1.691079 2.824552 -2.077581  
 C 4.410869 3.067465 0.687263  
 H 3.954954 1.015838 1.146819  
 C 4.125019 4.173720 -0.120289  
 H 2.920183 4.926705 -1.751139  
 H 5.186073 3.133535 1.454624  
 H 4.671194 5.109922 0.016906  
 C -2.446015 -1.100343 -1.452587  
 C -2.289128 -1.445899 -2.805035  
 C -3.271102 -1.898890 -0.638248  
 C -2.943264 -2.565764 -3.329215  
 H -1.660968 -0.850802 -3.469376  
 C -3.931538 -3.008173 -1.167886  
 H -3.401609 -1.652112 0.416232  
 C -3.766072 -3.347206 -2.514990  
 H -2.809312 -2.823195 -4.382666  
 H -4.573657 -3.613169 -0.523289  
 H -4.277940 -4.219694 -2.928072  
 C -2.873824 1.633025 -0.457455  
 C -4.244567 1.391111 -0.637492  
 C -2.451818 2.911983 -0.048051

<sup>99</sup>A-13

Geometry with 77 atoms:

Total energy: -3045.592831160  
 Cr -0.201872 -0.661567 1.082571  
 P 1.744940 0.225636 -0.517545  
 P -1.598722 0.482290 -0.600625  
 C -0.505551 1.131100 -1.966610  
 C 0.817551 0.370200 -2.122251  
 H -1.072630 1.146996 -2.910454  
 H -0.323992 2.180856 -1.693152  
 H 0.643264 -0.666854 -2.446714  
 H 1.444772 0.848553 -2.890288  
 C 3.103222 -0.964902 -0.861242  
 C 3.739342 -1.580012 0.231667  
 C 3.540344 -1.267984 -2.161952  
 C 4.794735 -2.473188 0.031066  
 H 3.407272 -1.364384 1.250397  
 C 4.587645 -2.172132 -2.360216  
 H 3.076644 -0.801025 -3.032819  
 C 5.217111 -2.774800 -1.266975  
 H 5.281806 -2.948005 0.890149  
 H 4.916457 -2.401796 -3.376746  
 H 6.036810 -3.479398 -1.426751  
 C 2.635102 1.833065 -0.326237  
 C 2.385218 2.952932 -1.137169  
 C 3.588298 1.947213 0.703787  
 C 3.064315 4.156427 -0.916206  
 H 1.670038 2.907353 -1.959295  
 C 4.270705 3.145640 0.916153  
 H 3.813429 1.090432 1.342965  
 C 4.006508 4.257695 0.109219  
 H 2.856534 5.016096 -1.558094  
 H 5.013438 3.210556 1.715100  
 H 4.537610 5.197587 0.277505  
 C -2.800880 -0.647517 -1.390358  
 C -2.473991 -1.339884 -2.568734  
 C -4.027715 -0.917123 -0.755705  
 C -3.360331 -2.278692 -3.104276  
 H -1.527096 -1.160380 -3.081367  
 C -4.911222 -1.852804 -1.298047  
 H -4.302112 -0.390575 0.160630  
 C -4.579197 -2.537478 -2.471319  
 H -3.095103 -2.809302 -4.021912  
 H -5.863675 -2.047118 -0.799019  
 H -5.271057 -3.270805 -2.892481  
 C -2.523794 1.979563 -0.085970  
 C -1.945834 2.788857 0.908091  
 C -3.725210 2.385285 -0.690447

<sup>99</sup>A-14

Geometry with 77 atoms:

Total energy: -3045.594721370  
 Cr -0.088625 -0.422934 1.202362  
 P 1.715201 0.335667 -0.527657  
 P -1.681247 0.305365 -0.578578  
 C -0.648091 1.091261 -1.908507  
 C 0.721191 0.417504 -2.098965  
 H -1.203287 1.108909 -2.858843  
 H -0.526964 2.139540 -1.595117  
 H 0.606447 -0.629599 -2.419920  
 H 1.289493 0.931645 -2.889661  
 C 3.101804 -0.805234 -0.895408  
 C 3.652484 -1.545586 0.163553  
 C 3.653464 0.393180 -2.181694  
 C 4.735881 -2.400289 -0.057141  
 H 3.231398 -1.457737 1.168012  
 C 4.729152 -1.795377 -2.401529  
 H 3.255436 -0.354165 -3.018648  
 C 5.272034 -2.529504 -1.341266  
 H 5.155164 -2.971908 0.774297  
 H 5.149187 -1.891732 -3.405724  
 H 6.114278 -3.202955 -1.517567  
 C 2.537194 1.975965 -0.374548  
 C 3.518983 2.121367 0.623492  
 C 2.202566 3.088406 -1.163666  
 C 4.147877 3.350355 0.828170  
 H 3.811755 1.261644 1.233354  
 C 2.830061 4.321145 -0.951040  
 H 1.461514 3.011086 -1.961051  
 C 3.799914 4.456414 0.044800  
 H 4.914953 3.444370 1.600791  
 H 2.560891 5.177514 -1.574337  
 H 4.289447 5.419604 0.207133  
 C -2.597663 -1.070521 -1.378474  
 C -2.291519 -1.546485 -2.662270  
 C -3.604483 -1.708582 -0.631777  
 C -2.986185 -2.639852 -3.191072  
 H -1.515056 -1.078122 -3.269304  
 C -4.297924 -2.794996 -1.165489  
 H -3.852868 -1.355795 0.372054  
 C -3.988279 -3.265581 -2.446634  
 H -2.740245 -3.000822 -4.192733  
 H -5.082306 -3.278085 -0.577904  
 H -4.528708 -4.119154 -2.862729  
 C -2.983022 1.537449 -0.186747  
 C -3.378917 2.526350 -1.103468  
 C -3.630684 1.455976 1.058639

|   |           |           |           |   |           |           |           |   |           |            |           |
|---|-----------|-----------|-----------|---|-----------|-----------|-----------|---|-----------|------------|-----------|
| C | -4.399601 | 3.421891  | -0.772601 | C | -3.254699 | 4.246670  | -0.442255 | C | -3.372440 | 4.118074   | -0.635323 |
| H | -2.905020 | 2.605642  | -2.084018 | H | -2.867888 | 2.729548  | -1.925615 | H | -2.996817 | 2.513798   | -1.027637 |
| C | -4.657077 | 2.347514  | 1.380542  | C | -2.460485 | 3.783439  | 1.799001  | C | -2.412176 | 3.867144   | 1.574649  |
| H | -3.328759 | 0.694958  | 1.780806  | H | -1.454691 | 1.899948  | 2.082475  | H | -1.283479 | 2.064731   | 1.920909  |
| C | -5.040189 | 3.334451  | 0.467184  | C | -3.112300 | 4.628445  | 0.897351  | C | -3.168584 | 4.605707   | 0.661220  |
| H | -4.699161 | 4.188613  | -1.491191 | H | -3.770110 | 4.903112  | -1.147476 | H | -3.966909 | 4.692225   | -1.350086 |
| H | -5.155366 | 2.272878  | 2.350069  | H | -2.356905 | 4.072965  | 2.847481  | H | -2.257563 | 4.241250   | 2.589483  |
| H | -5.839362 | 4.035051  | 0.720727  | H | -3.516321 | 5.584789  | 1.238245  | H | -3.605667 | 5.561729   | 0.959616  |
| C | -1.297362 | -0.942717 | 2.761440  | C | -1.723803 | -0.941539 | 2.293823  | C | -1.684002 | -0.703604  | 2.365952  |
| C | 0.001483  | -1.393644 | 3.376904  | C | -1.941927 | -2.300157 | 2.965977  | C | -2.181245 | -1.979541  | 3.054901  |
| C | 0.197639  | -2.890197 | 3.649139  | C | -2.780721 | -3.283304 | 2.136327  | C | -3.037884 | -2.910420  | 2.182644  |
| C | -0.075299 | -3.824527 | 2.464399  | C | -2.345953 | -3.477744 | 0.675423  | C | -2.464464 | -3.311175  | 0.812150  |
| C | 0.647190  | -3.441389 | 1.164914  | C | -0.837899 | -3.735029 | 0.467556  | C | -0.964608 | -3.676819  | 0.784518  |
| C | -0.028741 | -2.324319 | 0.363320  | C | -0.050755 | -2.535336 | -0.057338 | C | -0.059649 | -2.588336  | 0.211184  |
| H | -1.772016 | -0.097066 | 3.277362  | H | -1.442285 | -0.175251 | 3.050049  | H | -1.324015 | 0.024295   | 3.126838  |
| H | -2.021015 | -1.742280 | 2.559055  | H | -2.663889 | -0.590039 | 1.834847  | H | -2.532217 | -0.209415  | 1.858907  |
| H | 0.897647  | -1.105370 | 2.691785  | H | -0.973168 | -2.769933 | 3.216913  | H | -1.335997 | -2.556283  | 3.464609  |
| H | 0.264921  | -0.812122 | 4.274830  | H | -2.446774 | -2.168216 | 3.941969  | H | -2.790046 | -1.712556  | 3.940196  |
| H | 1.233817  | -3.045062 | 3.998401  | H | -2.775848 | -4.261352 | 2.649961  | H | -3.240108 | -3.823857  | 2.770153  |
| H | -0.457394 | -3.163767 | 4.493649  | H | -3.832154 | -2.944137 | 2.139764  | H | -4.023175 | -2.439727  | 2.014029  |
| H | -1.159761 | -3.881881 | 2.265964  | H | -2.639773 | -2.596588 | 0.084774  | H | -2.637810 | -2.499262  | 0.093633  |
| H | 0.225295  | -4.841068 | 2.767519  | H | -2.929129 | -4.315533 | 0.259554  | H | -3.060762 | -4.159283  | 0.436607  |
| H | 1.702233  | -3.195771 | 1.385368  | H | -0.386176 | -4.114816 | 1.401380  | H | -0.622988 | -3.967372  | 1.793968  |
| H | 0.694131  | -4.340692 | 0.521970  | H | -0.707584 | -0.561026 | -0.257764 | H | -0.824141 | -4.587348  | 0.171086  |
| H | -1.080474 | -2.597829 | 0.182693  | H | -0.440087 | -2.242713 | -1.048377 | H | -0.327059 | -2.381847  | -0.841268 |
| H | 0.448765  | -2.229710 | -0.628346 | H | 1.020579  | -2.781592 | -0.174653 | H | 1.003444  | -2.892706  | 0.239909  |
| C | 0.620898  | 1.804280  | 2.750299  | C | 1.774372  | -2.143820 | 2.537676  | C | 1.157808  | -1.9709718 | 3.266621  |
| C | -0.234328 | 2.310550  | 1.849224  | C | 1.434022  | -1.054222 | 3.247625  | C | 2.180504  | -1.179266  | 2.569942  |
| H | 0.276131  | 1.455585  | 3.727488  | H | 2.592386  | -2.125061 | 1.811179  | H | 0.866525  | -2.755115  | 3.131248  |
| H | 1.700063  | 1.796152  | 2.569742  | H | 1.283225  | -3.107553 | 2.700782  | H | 0.641630  | -1.150895  | 4.051891  |
| H | 0.124998  | 2.735407  | 0.906540  | H | 0.661954  | -1.091739 | 4.021843  | H | 2.541336  | -0.162217  | 2.759886  |
| H | -1.305237 | 2.387840  | 2.051986  | H | 1.972547  | -0.106726 | 3.127963  | H | 2.757026  | -1.774935  | 1.856868  |

9A-15

Geometry with 77 atoms:  
 Total energy: -3045.591674070  
 Cr -0.077840 -0.801032 1.066795  
 P 1.880165 0.117322 -0.439583  
 P -1.350718 0.604005 -0.579994  
 C -0.216376 1.127975 -1.976111  
 C 1.033692 0.247907 -2.095156  
 H -0.780441 1.147422 -2.920914  
 H 0.069823 2.166733 -1.750442  
 H 0.770038 -0.773374 -2.409616  
 H 1.731470 0.660350 -2.841070  
 C 3.368417 -0.910365 -0.710856  
 C 4.451464 -0.790420 0.181544  
 C 3.411042 -1.902499 -1.706055  
 C 5.554391 -1.639610 0.072998  
 H 4.441119 -0.022757 0.960031  
 C 4.518201 -2.750707 -1.809092  
 H 2.585987 -2.024432 -2.410113  
 C 5.590018 -2.623120 -0.921808  
 H 6.390554 -1.531683 0.768163  
 H 4.540868 -3.514486 -2.590311  
 H 6.453096 -3.287847 -1.004948  
 C 2.486764 1.822693 -0.155213  
 C 3.592733 2.349264 -0.846422  
 C 1.770660 2.648783 0.726760  
 C 3.969381 3.679876 -0.654313  
 H 4.163802 1.716824 -1.530853  
 C 2.143903 3.983604 0.910018  
 H 0.906778 2.256852 1.269196  
 C 3.244728 4.498855 0.220509  
 H 4.831406 4.082010 -1.192258  
 H 1.573504 4.618378 1.592299  
 H 3.541548 5.540566 0.364845  
 C -2.734072 -0.298546 -1.364089  
 C -4.000469 -0.287500 -0.753952  
 C -2.521578 -1.103060 -2.496458  
 C -5.034162 -1.072610 -1.268538  
 H -4.183958 0.337239 0.122801  
 C -3.560317 -1.886064 -3.007105  
 H -1.547588 -1.128475 -2.989847  
 C -4.815734 -1.876285 -2.392160  
 H -6.015363 -1.055749 -0.788274  
 H -3.385656 -2.507236 -3.888815  
 H -5.625398 -2.492205 -2.790645  
 C -2.076639 2.173628 0.019857  
 C -2.742137 3.025096 -0.880846  
 C -1.944264 2.558810 1.362996

9A-16

Geometry with 77 atoms:  
 Total energy: -3045.590022430  
 Cr -0.026594 -0.753036 1.126604  
 P 1.888848 0.039555 -0.468730  
 P -1.302354 0.563458 -0.623172  
 C -0.173539 1.048614 -2.038273  
 C 1.079322 0.173050 -2.139436  
 H -0.745350 1.042350 -2.978569  
 H 0.113123 2.093027 -1.840425  
 H 0.839553 -0.849474 -2.470891  
 H 1.792895 0.593522 -2.865453  
 C 3.399040 -0.956990 -0.736075  
 C 3.307419 -2.181466 -1.424736  
 C 4.625612 -0.587105 -0.156142  
 C 4.427784 -3.007342 -1.544791  
 H 2.360703 -2.502022 -1.865748  
 C 5.741178 -1.420242 -0.276172  
 H 4.717008 0.356057 0.386986  
 C 5.646158 -2.629665 -0.970945  
 H 4.346841 -3.952119 -2.087720  
 H 6.689911 -1.119434 0.175118  
 H 6.520434 -3.278233 -1.064323  
 C 2.443232 1.757322 -0.144682  
 C 3.298566 2.441498 -1.027833  
 C 1.948264 2.429809 0.984675  
 C 3.644352 3.771406 -0.781875  
 H 3.701583 1.931356 -1.906553  
 C 2.290976 3.763364 1.227785  
 H 1.283328 1.917024 1.684429  
 C 3.139165 4.434355 0.343676  
 H 4.310779 4.295161 -1.471440  
 H 1.892877 4.276436 2.106360  
 H 3.408895 5.476671 0.530459  
 C -2.660961 -0.386082 -1.395854  
 C -3.953462 -0.338022 -0.845997  
 C -2.399375 -1.257032 -2.467308  
 C -4.965447 -1.149760 -1.363567  
 H -4.173334 0.332418 -0.012616  
 C -3.415569 -2.066586 -2.980301  
 H -1.401645 -1.318442 -2.907098  
 C -4.698891 -2.016995 -2.427851  
 H -5.967756 -1.104669 -0.931174  
 H -3.201880 -2.739459 -3.814243  
 H -5.491923 -2.652973 -2.828265  
 C -2.058921 2.145952 -0.102851  
 C -2.822430 2.893971 -1.017857  
 C -1.858466 2.640692 1.194681

9A-17

Geometry with 77 atoms:  
 Total energy: -3045.593721960  
 Cr -0.188668 0.686328 1.130488  
 P 1.712536 -0.080369 -0.647079  
 P -1.605536 -0.184288 -0.722338  
 C -0.602264 0.008543 -2.279661  
 C 0.752010 -0.691582 -2.128581  
 H -1.165436 -0.398137 -3.134397  
 H -0.465863 1.086699 -2.460363  
 H 0.606114 -1.770400 -1.968280  
 H 1.355868 -0.602071 -3.043598  
 C 2.799086 -1.518166 -0.263017  
 C 2.179108 -2.739282 0.066918  
 C 4.201317 -1.444248 -0.255907  
 C 2.945566 -3.860078 0.390144  
 H 1.089727 -2.824965 0.069543  
 C 4.964402 -2.568644 0.076186  
 H 4.710300 -0.515594 -0.518777  
 C 4.341889 -3.776547 0.400396  
 H 2.447810 -4.800773 0.638216  
 H 6.054867 -2.497382 0.073631  
 H 4.942198 -4.652488 0.658008  
 C 2.843265 1.236761 -1.240493  
 C 2.924180 1.662226 -2.575170  
 C 3.622451 1.893503 -0.268037  
 C 3.771638 2.718030 -2.929947  
 H 2.331967 1.180426 -3.355462  
 C 4.478740 2.935229 -0.627109  
 H 3.564211 1.583694 0.779452  
 C 4.551873 3.353202 -1.960900  
 H 3.823574 3.040563 -3.972690  
 H 5.086207 3.426743 0.136756  
 H 5.215161 4.174473 -2.242420  
 C -2.049033 -1.960000 -0.695379  
 C -2.735099 -2.536257 -1.779788  
 C -1.694148 -2.757245 0.403913  
 C -3.046156 -3.896358 -1.766624  
 H -3.035913 -1.919866 -2.631032  
 C -2.010658 -4.120203 0.413188  
 H -1.174491 -2.311164 1.252745  
 C -2.681969 -4.690033 -0.671359  
 H -3.579197 -4.339705 -2.611186  
 H -1.733493 -4.734472 1.273293  
 H -2.929031 -5.754487 -0.663678  
 C -3.178799 0.700026 -1.025218  
 C -3.282239 1.761030 -1.941333  
 C -4.297460 0.353234 -0.245733

C -4.487364 2.457691 -2.077497  
 H -2.433372 2.055842 -2.561054  
 C -5.497511 1.051917 -0.387028  
 H -4.233864 -0.469478 0.470777  
 C -5.595157 2.106041 -1.301839  
 H -4.558696 3.276565 -2.797575  
 H -6.361264 0.770694 0.220198  
 H -6.535764 2.651019 -1.411655  
 C -1.859611 1.072832 2.315603  
 C -1.615464 1.772254 3.660700  
 C -0.816132 0.963334 4.693534  
 C 0.701508 0.918309 4.468626  
 C 1.157006 0.495257 3.064422  
 C 0.490672 -0.707888 2.445278  
 H -2.568406 1.663172 1.710189  
 H -2.346844 0.095705 2.491260  
 H -1.118655 2.751048 3.510148  
 H -2.594586 2.019239 4.113624  
 H -0.986390 1.385963 5.697614  
 H -1.221878 -0.062770 4.732473  
 H 1.152247 0.215250 5.189386  
 H 1.133732 1.909187 4.693712  
 H 0.997850 1.433134 2.403821  
 H 2.256420 0.424701 3.020007  
 H -0.282619 -1.174552 3.066600  
 H 1.185199 -1.457241 2.051158  
 C -0.815151 3.290499 0.448868  
 C 0.394614 3.127260 -0.109950  
 H -0.929442 3.670280 1.467732  
 H -1.738090 3.113104 -0.110383  
 H 0.512900 2.824056 -1.153794  
 H 1.319307 3.368092 0.422291

\*9A-18

Geometry with 77 atoms:  
 Total energy: -3045.590354100  
 Cr -0.197366 0.428514 1.203262  
 P 1.881006 0.123333 -0.519227  
 P -1.363340 -0.394190 -0.830825  
 C -0.266254 -0.082602 -2.301174  
 C 1.125127 -0.671200 -2.037509  
 H -0.726210 -0.522342 -3.200062  
 H -0.205909 1.006268 -2.458519  
 H 1.057043 -1.757883 -1.879533  
 H 1.792519 -0.509412 -2.897025  
 C 3.027320 -1.116457 0.203682  
 C 4.169272 -0.680304 0.902774  
 C 2.693307 -2.482685 0.236376  
 C 4.960602 -1.591503 1.606090  
 H 4.450460 0.375450 0.893718  
 C 3.489472 -3.390745 0.941258  
 H 1.810389 -2.856729 -0.285956  
 C 4.623541 -2.949023 1.628713  
 H 5.847300 -1.237804 2.137895  
 H 3.221134 -4.450097 0.948088  
 H 5.244992 -3.660338 2.177802  
 C 2.952390 1.432609 -1.230484  
 C 4.127913 1.107779 -1.934340  
 C 2.562063 2.777016 -1.126312  
 C 4.898951 2.115950 -2.513989  
 H 4.446843 0.066118 -2.022289  
 C 3.336301 3.784132 -1.713255  
 H 1.649997 3.042665 -0.590119  
 C 4.504853 3.455455 -2.403813  
 H 5.812027 1.856245 -3.055438  
 H 3.023904 4.827573 -1.626098  
 H 5.111988 4.242177 -2.858367  
 C -1.613350 -2.208365 -0.882797  
 C -2.293796 -2.805126 -1.959773  
 C -1.077090 -3.022367 0.127739  
 C -2.429142 -4.192885 -2.021048  
 H -2.728838 -2.183545 -2.746552  
 C -1.210666 -4.413008 0.061440  
 H -0.559026 -2.575394 0.978364  
 C -1.886187 -4.998275 -1.012420  
 H -2.962561 -4.649107 -2.858443  
 H -0.791968 -5.036940 0.854620  
 H -1.996190 -6.084228 -1.063085  
 C -2.981592 0.354817 -1.215243  
 C -3.067289 1.560139 -1.933408  
 C -4.150853 -0.210334 -0.674844

C -4.303851 2.187019 -2.107543  
 H -2.175789 2.024481 -2.359343  
 C -5.382723 0.422976 -0.850284  
 H -4.102086 -1.148693 -0.118001  
 C -5.461653 1.623447 -1.563671  
 H -4.360222 3.122343 -2.669476  
 H -6.284956 -0.024455 -0.426660  
 H -6.426364 2.118611 -1.697657  
 C -0.595499 2.421168 0.910185  
 C -1.589836 3.147758 1.813203  
 C -2.987840 2.500176 1.900596  
 C -3.228822 1.658506 3.163807  
 C -2.124413 0.655875 3.528074  
 C -1.720032 -0.275255 2.381494  
 H 0.406658 2.879599 0.988245  
 H -0.916000 2.485715 -0.146301  
 H -1.166871 3.263406 2.827529  
 H -1.693051 4.182545 1.434518  
 H -3.764357 3.281627 1.862978  
 H -3.152137 1.881488 1.004629  
 H -4.180091 1.110651 3.039747  
 H -3.377735 2.335245 4.024177  
 H -1.245612 1.208366 3.910287  
 H -2.478698 0.864839 4.394045  
 H -2.612888 -0.600217 1.820767  
 H -1.244063 -1.199660 2.773446  
 C 1.375467 -0.010164 3.316867  
 C 1.568383 1.284662 3.011650  
 H 1.988239 -0.798282 2.864353  
 H 0.647778 -0.315103 4.073972  
 H 1.002868 2.081700 3.503862  
 H 2.344828 1.596538 2.306119

\*9A-19

Geometry with 77 atoms:  
 Total energy: -3045.591375020  
 Cr 0.196773 -0.601361 1.114982  
 P -1.838736 0.014942 -0.498024  
 P 1.371258 0.584708 -0.696152  
 C 0.365722 0.391134 -2.247038  
 C -1.085109 0.823923 -2.007462  
 H 0.824588 0.973233 -3.061051  
 H 0.423707 -0.668766 -2.536635  
 H -1.131395 1.906000 -1.807861  
 H -1.714237 0.634542 -2.890998  
 C -3.084871 1.239180 0.061300  
 C -2.687645 2.174263 1.034088  
 C -4.383339 1.313250 -0.471706  
 C -3.572734 3.163514 1.470466  
 H -1.675065 2.144161 1.446192  
 C -5.268065 2.299236 -0.027272  
 H -4.708412 0.598226 -1.230685  
 C -4.866378 3.223163 0.943591  
 H -3.251757 3.885782 2.224852  
 H -6.277141 2.347600 -0.443869  
 H -5.562938 3.990799 1.289282  
 C -2.777531 -1.434312 -1.108127  
 C -2.400265 -2.109187 -2.281708  
 C -3.819299 -1.965512 -0.323405  
 C -3.053849 -3.284547 -2.664135  
 H -1.593400 -1.729035 -2.911045  
 C -4.471088 -3.138191 -0.711046  
 H -4.141190 -1.452310 0.586547  
 C -4.088628 -3.802700 -1.881161  
 H -2.751465 -3.795781 -3.581342  
 H -5.284614 -3.532269 -0.097124  
 H -4.598980 -4.720392 -2.182890  
 C 1.451192 2.397114 -0.432626  
 C 1.806370 3.268389 -1.477896  
 C 1.141257 2.929522 0.829284  
 C 1.835249 4.647125 -1.262493  
 H 2.070164 2.872845 -2.461970  
 C 1.173048 4.311174 1.043132  
 H 0.892825 2.265303 1.660225  
 C 1.515555 5.170360 -0.003521  
 H 2.112072 5.317727 -2.079500  
 H 0.934018 4.714109 2.030232  
 H 1.540037 6.250211 0.161615  
 C 3.069896 0.073025 -1.126839  
 C 3.312072 -0.972813 -2.034454  
 C 4.153015 0.667228 -0.454687

C 4.618417 -1.409987 -2.268298  
 H 2.490808 -1.462293 -2.561544  
 C 5.455307 0.221967 -0.689554  
 H 3.981508 1.482257 0.252216  
 C 5.690713 -0.817276 -1.595433  
 H 4.796833 -2.221047 -2.978345  
 H 6.289820 0.691105 -0.162990  
 H 6.710617 -1.164285 -1.777598  
 C 0.487990 -2.437237 0.219548  
 C 1.382287 -3.451490 0.931316  
 C 2.828293 -2.975349 1.190523  
 C 3.127706 -2.546719 2.635193  
 C 2.123680 -1.576147 3.275410  
 C 1.783132 -0.363179 2.404217  
 H -0.532268 -2.835153 0.071532  
 H 0.900943 -2.223553 -0.783433  
 H 0.917773 -3.776184 1.879674  
 H 1.408655 -4.367095 0.309860  
 H 3.537811 -3.775936 0.924034  
 H 3.057826 -2.143282 0.506757  
 H 4.130282 -2.083414 2.654156  
 H 3.196948 -3.445336 3.274105  
 H 1.205298 -2.126506 3.549290  
 H 2.547170 -2.167020 4.243561  
 H 2.697066 0.036153 1.932244  
 H 1.365874 0.458486 3.029398  
 C -1.380827 -0.800119 3.209399  
 C -1.494072 -2.011091 2.636969  
 H -2.055918 0.021027 2.942636  
 H -0.668066 -0.616068 4.018793  
 H -0.869955 -2.853700 2.947246  
 H -2.249423 -2.218503 1.874073

\*9A-20

Geometry with 77 atoms:  
 Total energy: -3045.593841670  
 Cr -0.150030 -0.267533 1.302355  
 P 1.744946 0.202273 -0.517338  
 P -1.683269 0.205171 -0.617736  
 C -0.610668 0.865932 -1.984522  
 C 0.742509 0.146976 -2.088001  
 H -1.147777 0.814029 -2.943758  
 H 0.470758 1.934590 -1.758806  
 H 0.604533 -0.925607 -2.295422  
 H 1.339552 0.546378 -2.922656  
 C 3.150543 -0.924804 -0.910543  
 C 2.907702 -2.309322 -0.984513  
 C 4.451972 -0.448957 -1.145547  
 C 3.943623 -3.195351 -1.287488  
 H 1.908202 -2.706600 -0.807577  
 C 5.486628 -1.341676 -1.441662  
 H 4.668444 0.619391 -1.101584  
 C 5.237304 -2.714639 -1.512815  
 H 7.374743 -4.267143 -1.341358  
 H 6.493645 -0.956875 -1.620962  
 H 6.048758 -3.409029 -1.743824  
 C 2.504223 1.871914 0.462555  
 C 3.267223 2.199027 0.674536  
 C 2.349872 2.832270 -1.475321  
 C 3.863955 3.455121 0.793805  
 H 3.408537 1.459239 1.468225  
 C 2.937477 4.095568 -1.346883  
 H 1.776513 2.609816 -2.376993  
 C 3.693727 4.409835 -0.215024  
 H 4.459723 3.691780 1.678705  
 H 2.807000 4.834476 -2.141346  
 H 4.152805 5.396602 -0.118774  
 C -2.537974 -1.272504 -1.293144  
 C -2.257051 -1.820245 -2.553778  
 C -3.497602 -1.892262 -0.472493  
 C -2.926926 -2.970936 -2.984891  
 H -1.521336 -1.363779 -3.218164  
 C -4.168126 -3.034611 -0.909656  
 H -3.725838 -1.478325 0.513296  
 C -3.881319 -3.579060 -2.166766  
 H -2.700919 -3.389366 -3.968744  
 H -4.915537 -3.503894 -0.265423  
 H -4.403572 -4.476413 -2.507210  
 C -3.027936 1.431520 -0.408250  
 C -3.470603 2.244499 -1.465008  
 C -3.654406 1.526004 0.846440

C -4.519973 3.144716 -1.262645  
H -3.009017 2.179389 -2.452706  
C -4.710173 2.420511 1.040428  
H -3.307414 0.904875 1.675730  
C -5.141097 3.233537 -0.012561  
H -4.857302 3.776275 -2.088170  
H -5.192719 2.487126 2.018477  
H -5.962621 3.937655 0.140299  
C -1.192160 -0.529282 3.036726  
C 0.189258 -0.773061 3.588451  
C 0.534992 -2.175730 4.105380  
C 0.185320 -3.340825 3.169936  
C 0.671065 -3.185829 1.720437  
C -0.206212 -2.277456 0.855533  
H -1.685292 0.373736 3.421592  
H -1.868660 -1.392023 3.066609  
H 0.998932 -0.559842 2.776677  
H 0.485954 -0.014054 4.329934  
H 1.616061 -2.203373 4.328281  
H 0.017096 -2.314551 5.069501  
H -0.906528 -3.503679 3.160858  
H 0.618468 -4.255921 3.606124  
H 1.725655 -2.849743 1.713568  
H 0.689576 -4.192143 1.259832  
H -1.262130 -2.579974 0.940315  
H 0.051623 -2.371518 -0.213063  
C 0.321389 2.372750 2.549633  
C -0.308814 2.725466 1.420971  
H 1.410532 2.293603 2.599176  
H -0.228222 2.211807 3.480940  
H -1.391762 2.853736 1.392117  
H 0.247479 2.950608 0.506613

\*9A-21

Geometry with 77 atoms:

Total energy: -3045.593657370  
Cr -0.212929 -0.764660 1.018004  
P 1.736268 0.200250 -0.566494  
P -1.584707 0.337344 -0.706034  
C -0.498512 1.025211 -2.062391  
C 0.820315 0.250190 -2.180723  
H -1.061385 0.982095 -3.006747  
H -0.317576 2.087727 -1.849434  
H 0.626306 -0.801018 -2.447552  
H 1.449401 0.674430 -2.978215  
C 3.170621 -0.913865 -0.851789  
C 3.560632 -1.352934 -2.127874  
C 3.910912 -1.332242 0.268638  
C 4.669548 -2.192113 -2.274813  
H 3.012720 -1.046200 -3.020478  
C 5.024672 -2.160737 0.117273  
H 3.616648 -1.011707 1.271351  
C 5.404765 -2.594789 -1.156527  
H 4.962140 -2.528127 -3.272656  
H 5.592388 -2.473373 0.997095  
H 6.272332 -3.247944 -1.276791  
C 2.517177 1.868072 -0.415861  
C 2.350311 2.884952 -1.371594  
C 3.301795 2.136231 0.721684  
C 2.941948 4.139414 -1.185706  
H 1.773044 2.714281 -2.281235  
C 3.899404 3.384607 0.899980  
H 3.458479 1.361832 1.476139  
C 3.715117 4.393946 -0.051011  
H 2.802292 4.917344 -1.940485  
H 4.509575 3.571076 1.787038  
H 4.177494 5.373683 0.090856  
C -2.867344 -0.605555 -1.607765  
C -3.897756 0.058830 -2.298223  
C -2.770123 -2.003596 -1.687065  
C -4.819545 -0.671985 -3.049750  
H -3.986289 1.146511 -2.243958  
C -3.693286 -2.729579 -2.446018  
H -1.972811 -2.523751 -1.156413  
C -4.718429 -2.066292 -3.125110  
H -5.620708 -0.150944 -3.579593  
H -3.610960 -3.817647 -2.501975  
H -5.442333 -2.634906 -3.714011  
C -2.421699 1.767658 0.076520  
C -3.690765 1.591327 0.657834  
C -1.743576 2.984310 0.270346

C -4.272939 2.618989 1.403691  
H -4.228838 0.650003 0.527954  
C -2.330723 4.008424 1.018587  
H -0.748053 3.147386 -0.149389  
C -3.595532 3.828961 1.586684  
H -5.262142 2.471823 1.843918  
H -1.794282 4.949987 1.158260  
H -4.052946 4.630735 2.171132  
C -1.939520 -1.497160 1.940515  
C -1.744343 -2.451638 3.127251  
C -1.106269 -3.804451 2.777325  
C 0.416501 -3.788402 2.591158  
C 0.970132 -2.738144 1.617924  
C 0.291592 -2.593673 0.278138  
H -2.550437 -0.630661 2.246743  
H -2.515149 -2.014461 1.152752  
H -1.153504 -1.972478 3.932355  
H -2.732191 -2.653842 3.583323  
H -1.331174 -4.531190 3.575491  
H -1.593630 -4.202782 1.870178  
H 0.745646 -4.777976 2.231017  
H 0.900502 -3.642672 3.573024  
H 0.943365 -1.734982 2.197251  
H 2.059152 -2.856511 1.510695  
H -0.554456 -3.274007 0.128709  
H 0.973504 -2.630310 -0.581895  
C -0.565098 0.958948 3.062111  
C 0.607385 1.287542 2.494426  
H -1.494686 1.453019 2.766051  
H -0.628319 0.239816 3.883135  
H 1.553912 0.859952 2.839135  
H 0.675626 2.070969 1.735875

\*9A-22

Geometry with 77 atoms:

Total energy: -3045.590194310  
Cr -0.085827 0.273260 1.342580  
P 1.914200 0.149747 -0.471564  
P -1.375697 -0.292854 -0.748683  
C -0.270546 0.105831 -2.198551  
C 1.109059 -0.530951 -2.014133  
H -0.758757 -0.247265 -3.120206  
H -0.189612 1.201888 -2.273280  
H 1.019740 -1.623759 -1.914454  
H 1.755804 -0.334598 -2.882550  
C 3.153141 -1.108322 0.026746  
C 2.752193 -2.453643 0.141674  
C 4.436817 -0.740942 0.466360  
C 3.624519 -3.410911 0.664445  
H 1.753220 -2.767754 -0.172577  
C 5.304803 -1.702998 0.992272  
H 4.766016 0.298144 0.398606  
C 4.903613 -3.038396 1.091533  
H 3.302304 -4.452505 0.738572  
H 6.302081 -1.404437 1.324713  
H 5.585328 -3.787462 1.501283  
C 2.856372 1.591921 -1.095254  
C 2.507179 2.884078 -0.671999  
C 3.897615 1.429150 -2.029081  
C 3.188414 3.998675 -1.173751  
H 1.698216 3.024972 0.046449  
C 4.577338 2.542808 -2.523198  
H 4.185558 0.428565 -2.362180  
C 4.222920 3.829127 -2.096570  
H 2.909009 5.000616 -0.839142  
H 5.387514 2.408360 -3.244144  
H 4.757321 4.699306 -2.485671  
C -1.683331 -2.086673 -0.974899  
C -1.213380 -3.004308 -0.021391  
C -2.327565 -2.566623 -2.130493  
H -1.377819 -4.379222 -0.219638  
H -0.725290 -2.651910 0.889115  
C -2.494843 -3.938661 -2.323032  
H -2.710082 -1.866859 -2.877489  
C -2.018296 -4.846767 -1.369615  
H -1.010309 -5.083284 0.530647  
H -3.001117 -4.301902 -3.220620  
H -2.151827 -5.920295 -1.523777  
C -2.946873 0.560735 -1.135731  
C -4.184990 -0.053622 -0.879214  
C -2.924162 1.883954 -1.613194

C -5.375543 0.645424 -1.092714  
H -4.226006 -1.082107 -0.515967  
C -4.117712 2.576490 -1.827555  
H -1.978587 2.391327 -1.815889  
C -5.345258 1.960925 -1.564376  
H -6.331236 0.156491 -0.889387  
H -4.086592 3.603384 -2.199238  
H -6.277810 2.505862 -1.729330  
C -0.622626 2.243541 1.393376  
C -1.656550 2.746344 2.396691  
C -3.102872 2.240829 2.213594  
C -3.505674 0.998686 3.022405  
C -2.907905 -0.353323 2.613735  
C -1.388956 -0.458014 2.729531  
H 0.362151 2.705644 1.600171  
H -0.908377 2.523416 0.363193  
H -1.322121 2.529032 3.427624  
H -1.668322 3.851888 2.328939  
H -3.784806 3.052939 2.516415  
H -3.304068 2.071899 1.142671  
H -4.604867 0.906800 2.973182  
H -3.269388 1.182025 4.087892  
H -3.378323 -1.124081 3.254849  
H -3.237446 -0.598041 1.590232  
H -1.071922 -1.524870 2.738553  
H -1.049651 -0.030004 3.692138  
C 1.806497 -0.392850 3.292451  
C 1.786244 0.948784 3.223976  
H 2.503345 -0.984934 2.690100  
H 1.164911 -0.938074 3.990901  
H 1.132672 1.547865 3.865780  
H 2.472683 1.495858 2.569242

\*9A-23

Geometry with 77 atoms:

Total energy: -3045.591355340  
Cr -0.082496 -0.372509 1.225835  
P 1.635129 0.144636 -0.681366  
P -1.721280 0.149962 -0.597224  
C -0.765794 0.558072 -2.152230  
C 0.627399 -0.080987 -2.243362  
H -1.378133 0.302701 -3.031412  
H -0.688458 1.654724 -2.152753  
H 0.551109 -1.166596 -2.405007  
H 1.174720 0.341420 -3.100045  
C 3.077520 -0.965394 -0.861918  
C 3.761885 -1.327882 0.312182  
C 3.524705 -1.461204 -2.097346  
C 4.874114 -2.170033 0.252898  
H 3.422717 -0.948813 1.280999  
C 4.630491 -2.315262 -2.151904  
H 3.021829 -1.185103 -3.026283  
C 5.306180 -2.669950 -0.980374  
H 5.400698 -2.441677 1.171005  
H 4.967921 -2.701753 -3.116667  
H 6.170547 -3.336705 -1.027753  
C 2.326796 1.843101 -0.849070  
C 3.706519 2.507882 -0.992748  
C 1.457647 2.951161 -0.818987  
C 4.201104 3.370161 -1.113943  
H 4.403527 1.228168 -1.013958  
C 1.955601 4.249039 -0.950316  
H 0.383147 2.812424 -0.688412  
C 3.329789 4.462364 -1.096799  
H 5.276568 3.528626 -1.225805  
H 1.265736 5.096349 -0.931266  
H 3.720179 5.478254 -1.193947  
C -2.651848 -1.388758 -0.941390  
C -2.408321 -2.193562 -2.064960  
C -3.583678 -1.815533 0.023919  
C -3.086348 -3.407841 -2.219858  
H -1.688444 -1.890190 -2.827162  
C -4.266928 -3.020433 -0.141895  
H -3.770278 -1.202960 0.909763  
C -4.015154 -3.822357 -1.262142  
H -2.886559 -4.029717 -3.095702  
H -4.993060 -3.339751 0.609429  
H -4.543533 -4.770539 -1.386653  
C -2.963947 1.492734 -0.518582  
C -2.612037 2.704422 0.102797  
C -4.225658 1.365268 -1.123808

C -3.510831 3.774120 0.112671  
H -1.641583 2.816373 0.588776  
C -5.121595 2.437321 -1.104261  
H -4.513795 0.430641 -1.609418  
C -4.766524 3.641586 -0.488341  
H -3.231044 4.711106 0.600267  
H -6.102036 2.329866 -1.574694  
H -5.470975 4.476875 -0.474216  
C 0.083116 1.437304 2.174643  
C 0.981316 1.473379 3.413046  
C 0.439405 0.708408 4.629824  
C 0.643979 -0.811928 4.588616  
C 0.213537 -1.505886 3.290344  
C -1.157725 -1.209720 2.737409  
H 0.465558 2.131093 1.410629  
H -0.945777 1.738035 2.435030  
H 2.001600 1.117850 3.167612  
H 1.115382 2.531736 3.707699  
H 0.924538 1.084340 5.545532  
H -0.633244 0.943150 4.743601  
H 0.088011 -1.277845 5.419695  
H 1.710489 -1.037937 4.764910  
H 1.040250 -1.209633 5.235552  
H 0.415952 -2.586955 3.352822  
H -1.760892 -0.507027 3.325467  
H -1.742897 -2.094969 2.457027  
C 0.597706 -3.221282 -0.230793  
C -0.384037 -3.608617 0.590202  
H 1.649438 -3.245334 0.066437  
H 0.385550 -2.915837 -1.258848  
H -1.430064 -3.617886 0.274313  
H -0.172839 -3.963423 1.603079

**\*9B-01**

Geometry with 85 atoms:

Total energy: -3274.499967820  
Cr -0.674975 -0.532424 1.214905  
C -1.068237 -2.480982 0.684076  
C -2.472717 -3.056567 0.491692  
C -3.317715 -3.285222 1.752528  
C -4.047878 -2.074032 2.348414  
C -3.205439 -1.052227 3.121486  
C -2.390000 -0.067449 2.282559  
H -2.000872 0.736453 2.937714  
H -3.069168 0.437302 1.571299  
H -2.561379 -1.595037 3.836961  
H -3.900682 -0.467948 3.756269  
H -4.815699 -2.462931 3.039965  
H -4.604741 -1.555763 1.545135  
H -4.087715 -4.034487 1.499071  
H -2.693631 -3.759658 2.534327  
H -3.053163 -2.436230 -0.211573  
H -2.367243 -4.036904 -0.013512  
H -0.496080 -2.606454 -0.254213  
H -0.527982 -3.068154 1.454126  
P -1.546525 0.306159 -0.900995  
C -3.213937 -0.064152 -1.540911  
C -3.409722 -1.060288 -2.513160  
C -4.702337 -1.391540 -2.928275  
C -5.807823 -0.737466 -2.377609  
C -5.618831 0.257285 -1.412387  
C -4.330295 0.593898 -0.993777  
H -4.195500 1.376716 -0.244048  
H -6.479092 0.775561 -0.982141  
H -6.817491 -1.000188 -2.702353  
H -4.843523 -2.167091 -3.684899  
H -2.562487 -1.593436 -2.948123  
C -1.455330 2.130458 -0.773874  
C -1.961760 2.962242 -1.784985  
C -1.861692 4.350257 -1.692011  
C -1.248944 4.915998 -0.571012  
C -0.737477 4.110963 0.449984  
C -0.836060 2.715899 0.350837  
O -0.327975 1.870257 1.310408  
C 0.145676 2.439094 2.537284  
H 0.412387 1.602952 3.190668  
H 1.041212 3.054204 2.364956  
H -0.644106 3.033444 3.021634  
H 0.262649 4.579631 1.310287  
H -1.165205 6.001722 -0.481269  
H -2.262292 4.984936 -2.484944

H -2.452709 2.510640 -2.650697  
C -0.361820 -0.102280 -2.271360  
C 1.047441 0.384974 -1.926967  
P 1.621543 -0.262760 -0.265957  
C 2.668861 -1.712999 -0.671742  
C 2.376648 -2.971087 -0.124787  
C 3.174201 -4.086526 -0.395513  
C 4.286758 -3.943267 -1.225261  
C 4.606195 -2.702938 -1.786156  
C 3.802732 -1.584546 -1.518309  
O 4.037234 -0.353617 -2.022164  
C 5.213276 -0.096854 -2.773350  
H 5.227551 -0.668870 -3.717220  
H 5.199851 0.976564 -3.004242  
H 6.121625 -0.327613 -2.190914  
H 5.479179 -2.616304 -2.432719  
H 4.921063 -4.805490 -1.446186  
H 2.925564 -5.056350 0.040014  
H 1.504775 -3.083976 0.518323  
C 2.818026 0.989251 0.360926  
C 2.633051 2.365953 0.152736  
C 3.506433 3.295388 0.726328  
C 4.572149 2.866328 1.522610  
C 4.763055 1.497355 1.736835  
C 3.895013 0.566461 1.161165  
H 4.069307 -0.499781 1.324897  
H 5.597885 -1.149301 2.350421  
H 5.254504 3.593794 1.968809  
H 3.351068 4.362042 0.544270  
H 1.808235 2.786127 -0.458019  
H 1.771659 0.081307 -2.694009  
H 1.068148 1.483501 -1.887732  
H -0.717757 0.353129 -3.209116  
H -0.379293 -1.196091 -2.404294  
C 1.314134 -1.081380 2.969526  
C 0.154357 -1.239543 3.632211  
H -0.355660 -2.205105 3.666306  
H -0.285274 -0.435895 4.229388  
H 1.791694 -1.916062 2.449353  
H 1.875759 -0.142188 2.990142

**\*9B-02**

Geometry with 85 atoms:

Total energy: -3274.498551170  
Cr -0.417852 -0.498341 1.227457  
C -0.372118 -2.493489 0.738587  
C -1.547894 -3.193644 0.056577  
C -2.687198 -3.653696 0.973080  
C -3.515611 -2.581821 1.694664  
C -2.815322 -1.793413 2.819163  
C -2.128525 -0.491928 2.400573  
H -1.806717 0.069650 3.298980  
H -2.869095 0.160717 1.903925  
H -2.102540 -2.461676 3.336489  
H -3.579255 -1.547257 3.582241  
H -4.386145 -3.098018 2.134405  
H -3.934599 -1.876965 0.956218  
H -3.381687 -4.260954 0.365726  
H -2.269491 -4.346154 1.728722  
H -1.967620 -2.562158 -0.745581  
H -1.169103 -4.093961 -0.465735  
H 0.530334 -2.583804 0.108677  
H -0.136414 -3.005605 1.690360  
P -1.672288 0.320778 -0.719147  
C -3.419639 -0.052872 -1.009334  
C -3.766525 -1.030880 -2.047462  
C -5.107880 -1.363057 -2.256612  
C -6.113561 -0.723737 -1.526515  
C -5.775604 0.259229 -0.590470  
C -4.437814 0.594226 -0.376008  
H -4.189434 1.367598 0.353911  
H -6.557931 0.768141 -0.022360  
H -7.161216 -0.987634 -1.689743  
H -5.365474 -2.126107 -2.994883  
H -2.998763 -1.545105 -2.628001  
C -1.611182 2.145888 -0.555802  
C -2.150441 2.973803 -1.554274  
C -2.077818 4.362339 -1.456184  
C -1.458188 4.935526 -0.342392  
C -0.918210 4.134895 0.665914  
C -0.990108 2.738946 0.560958

O -0.460773 1.904244 1.524521  
C -0.193396 2.463910 2.816125  
H 0.110915 1.636172 3.462925  
H 0.625241 3.198638 2.773505  
H -1.098635 2.935261 3.228848  
H -0.439573 4.607360 1.521916  
H -1.392410 6.022104 -0.249253  
H -2.504447 4.992292 -2.239264  
H -2.645662 2.517516 -2.415340  
C -0.733730 0.009593 -2.289327  
C 0.680874 0.585655 -2.176367  
P 1.585616 0.025903 -0.636908  
C 2.508538 -1.464007 -1.194563  
C 2.155914 -2.203516 -2.331922  
C 2.843644 -3.370005 -2.681621  
C 3.903433 -3.806936 -1.886828  
C 4.276973 -3.092171 -0.744295  
C 3.577186 -1.931380 -0.390481  
O 3.852775 -1.186274 0.707821  
C 4.963337 -1.501291 1.530112  
H 5.003056 -0.724387 2.305385  
H 4.847570 -2.487353 2.012866  
H 5.907003 -1.482640 0.958621  
H 5.106883 -3.447778 -0.133754  
H 4.451095 -4.714768 -2.151383  
H 2.551371 -3.929041 -3.572918  
H 1.331778 -1.875650 -2.966954  
C 2.878523 1.323293 -0.480216  
C 3.885256 1.475703 -1.447479  
C 4.840458 2.485706 -1.312439  
C 4.800799 3.350265 -0.212185  
C 3.803603 3.200385 0.755635  
C 2.847251 2.189054 0.621832  
H 2.073218 2.064863 1.379460  
H 3.772627 3.869899 1.619216  
H 5.550609 4.138680 -0.109156  
H 5.622158 2.597511 -2.068153  
H 3.931860 0.796104 -2.302518  
H 1.276136 0.358453 -3.073849  
H 0.632872 1.682726 -2.098023  
H -1.276503 0.455350 -3.137645  
H -0.720649 -1.081140 -2.439533  
C 0.611730 -1.090620 3.658452  
C 1.620347 -0.886794 2.793282  
H 2.157225 0.065091 2.739412  
H 2.007357 -1.690500 2.164747  
H 0.274105 -0.316388 4.352958  
H 0.119841 -2.061851 3.754570

**\*9B-03**

Geometry with 85 atoms:

Total energy: -3274.499121670  
Cr -0.353251 -0.542033 1.183788  
C -0.312345 -2.528094 0.632041  
C -1.488114 -3.181957 -0.097135  
C -2.627278 -3.696937 0.790449  
C -3.391605 -2.679517 1.648442  
C -2.616366 -2.044504 2.820410  
C -1.912616 -0.720747 2.519528  
H -1.420495 -0.352443 3.443679  
H -2.659046 0.046935 2.239932  
H -1.892673 -2.780742 3.216063  
H -3.331405 -1.875687 3.649145  
H -4.268620 -3.206573 2.061430  
H -3.802323 -1.882503 1.007103  
H -3.357736 -4.208607 0.138672  
H -2.220995 -4.481137 1.457149  
H -1.907971 -2.503593 -0.860035  
H -1.110639 -4.047666 -0.675477  
H 0.608239 -2.624588 0.032206  
H -0.126676 -3.062732 1.580764  
P -1.692662 0.303597 -0.693931  
C -3.451216 -0.062504 -1.012024  
C -3.854814 -0.972008 -2.003377  
C -5.207966 -1.289962 -2.153039  
C -6.164942 -0.704620 -1.319862  
C -5.768602 0.208933 -0.336653  
C -4.419539 0.528191 -0.180059  
H -4.119850 1.239809 0.592839  
H -6.513938 0.672566 0.313941  
H -7.221362 -0.957346 -1.438092



H -5.513170 -1.998725 -2.926453  
H -3.123900 -1.441550 -2.664073  
C -1.620348 2.131837 -0.559936  
C -2.077858 2.947758 -1.607818  
C -1.956010 4.334742 -1.543908  
C -1.364496 4.918461 -0.419229  
C -0.913945 4.129156 0.640228  
C -1.049807 2.735198 0.575179  
O -0.625912 1.911735 1.597659  
C -0.608587 2.465634 2.921707  
H -0.640928 1.624841 3.621736  
H 0.305943 3.055406 3.092527  
H -1.496714 3.093521 3.089298  
H -0.451123 4.603644 1.505211  
H -1.250764 6.003484 -0.360371  
H -2.317660 4.956769 -2.365169  
H -2.542428 2.483540 -2.481551  
C -0.782613 -0.012320 -2.284590  
C 0.625317 0.591160 -2.210501  
P 1.558681 0.053134 -0.683385  
C 2.493583 -1.427362 -1.230294  
C 2.217933 -2.120503 -2.416740  
C 2.908425 -3.290859 -2.747632  
C 3.891701 -3.775848 -1.885109  
C 4.186471 -3.106644 -0.692777  
C 3.481068 -1.944320 -0.357082  
O 3.674869 -1.244226 0.789545  
C 4.756834 -1.570545 1.648411  
H 4.639581 -2.574501 2.091002  
H 5.720991 -1.516125 1.115191  
H 4.749490 -0.824013 2.453215  
H 4.956275 -3.501376 -0.029869  
H 4.441200 -4.686657 -2.135211  
H 2.679003 -3.815588 -3.677335  
H 1.455824 -1.751538 -3.104799  
C 2.822197 1.374156 -0.503106  
C 3.997677 1.401011 -1.270699  
C 4.914226 2.443203 -1.111638  
C 4.665824 3.466497 -0.189468  
C 3.497434 3.444576 0.577532  
C 2.580920 2.399970 0.424388  
H 1.673605 2.374341 1.029757  
H 3.300350 2.424059 1.300223  
H 5.385762 4.279752 -0.068293  
H 5.828210 2.457197 -1.710796  
H 4.202085 0.601704 -1.987468  
H 1.205043 0.367001 -3.118647  
H 0.563863 1.687676 -2.141145  
H -1.351058 0.414464 -3.125846  
H -0.747930 -1.104244 -2.425770  
C 1.690041 -0.154824 3.057782  
C 1.432628 -1.472134 3.061548  
H 1.947896 -2.146355 2.374126  
H 0.739037 -1.921840 3.778450  
H 2.418943 0.279962 2.368871  
H 1.224856 0.515043 3.785256

<sup>9</sup>B-04

Geometry with 85 atoms:  
Total energy: -3274.498883230  
Cr -0.383082 -0.495563 1.066942  
C -0.377797 -2.369588 0.196501  
C -1.546664 -3.329475 0.414137  
C -1.715558 -3.904912 1.833226  
C -2.639487 -3.136637 2.788291  
C -2.155993 -1.782863 3.320301  
C -2.043570 -0.660734 2.282952  
H -2.011528 0.319502 2.797689  
H -2.958593 -0.651521 1.665323  
H -1.203471 -1.927139 3.864309  
H -2.874944 -1.469729 4.102879  
H -2.843255 -3.787568 3.656931  
H -3.615679 -2.990300 2.288652  
H -2.129764 -4.923061 1.738570  
H -0.721309 -4.039086 2.299799  
H -2.493572 -2.855950 0.102235  
H -1.409697 -4.181268 -0.280660  
H -0.247073 -2.193579 -0.887049  
H 0.569068 -2.837683 0.524908  
P -1.684229 0.368575 -0.809731  
C -3.316616 -0.340625 -1.213119

C -3.430917 -1.435539 -2.087172  
C -4.675069 -2.032878 -2.305366  
C -5.812078 -1.550947 -1.650480  
C -5.703582 -0.464833 -0.776014  
C -4.463749 0.138588 -0.555531  
H -4.391487 0.988066 0.127425  
H -6.588946 -0.083960 -0.261266  
H -6.783140 -2.021934 -1.821271  
H -4.753200 -2.881421 -2.989240  
H -2.554547 -1.839031 -2.597857  
C -1.957148 2.164901 -0.595056  
C -2.655463 2.900050 -1.567620  
C -2.833409 4.276707 -1.441146  
C -2.303371 4.931958 -0.326521  
C -1.608138 4.223891 0.655562  
C -1.432113 2.837758 0.527262  
O -0.750461 2.095872 1.464574  
C -0.569056 2.677740 2.759973  
H 0.172967 3.491910 2.734235  
H -1.524316 3.056966 3.154828  
H -0.203518 1.885457 3.417995  
H -1.203006 4.761677 1.511270  
H -2.431112 6.011111 -0.212370  
H -3.382200 4.832973 -2.203700  
H -3.077572 2.377384 -2.429757  
C -0.681150 0.288547 -2.371029  
C 0.705221 0.902370 -2.147904  
P 1.607826 0.194794 -0.670477  
C 2.543611 -1.233489 -1.342729  
C 2.267064 -1.821052 -2.585054  
C 2.970968 -2.945481 -3.027622  
C 3.973478 -3.490406 -2.225069  
C 4.273890 -2.925118 -0.981671  
C 3.553778 -1.810288 -0.535241  
O 3.761752 -1.205567 0.662772  
C 4.885978 -1.555675 1.455709  
H 5.826915 -1.423575 0.894953  
H 4.880973 -0.871449 2.314643  
H 4.820101 -2.594668 1.822398  
H 5.062498 -3.358668 -0.366741  
H 4.534382 -4.364781 -2.563869  
H 2.738900 -3.386128 -3.999370  
H 1.497552 -1.400414 -3.233825  
C 2.864043 1.498800 -0.353332  
C 4.125436 1.516124 -0.969152  
C 5.021825 2.553794 -0.701135  
C 4.668670 3.584030 0.177714  
C 3.412414 3.574375 0.790664  
C 2.516290 2.533716 0.529838  
H 1.535936 2.522795 1.007931  
H 3.130684 4.376854 1.477242  
H 5.373480 4.393239 0.384168  
H 6.002617 2.559079 -1.183369  
H 4.412967 0.716751 -1.656077  
H 1.331257 0.817312 -3.049783  
H 0.613667 1.979081 -1.933520  
H -1.222379 0.812115 -3.174798  
H -0.607672 -0.770729 -2.658769  
C 1.116551 -0.343591 3.154146  
C 1.348550 -1.605134 2.753625  
H 2.145954 -1.827815 2.042571  
H 0.774236 -2.446365 3.149674  
H 1.737599 0.485430 2.796628  
H 0.358881 -0.123866 3.912144

<sup>9</sup>B-05

Geometry with 85 atoms:  
Total energy: -3274.500156640  
Cr -0.368480 -0.464724 1.329178  
C -0.599085 -2.478507 1.000392  
C -1.817060 -3.061354 0.284849  
C -3.058528 -3.300946 1.151727  
C -3.721895 -2.084147 1.810179  
C -2.934855 -1.396331 2.944506  
H -2.044110 -0.227421 2.521398  
H -1.625778 0.258624 3.425334  
H -2.666920 0.545663 2.033960  
H -2.345117 -2.156946 3.489978  
H -3.667468 -1.021708 3.685715  
H -4.686293 -2.429496 2.220060  
H -3.978239 -1.338075 1.039086

H -3.816468 -3.802447 0.523735  
H -2.796994 -4.029264 1.942724  
H -2.099936 -2.438897 -0.581594  
H -1.539590 -4.038520 -0.157083  
H 0.319392 -2.734299 0.449166  
H -0.508460 -2.928454 2.006606  
P -1.455037 0.374298 -0.699881  
C -3.239928 0.276191 -1.064383  
C -3.758873 -0.699258 -1.932154  
C -5.139409 -0.806412 -2.122347  
C -6.010892 0.056434 -1.452075  
C -5.498799 1.035960 -0.594190  
C -4.121447 1.146717 -0.398828  
H -3.731779 1.916702 0.270978  
H -6.175778 1.717524 -0.073650  
H -7.089740 -0.030940 -1.601411  
H -5.533808 -1.567979 -2.799306  
H -3.095125 -1.383823 -2.463296  
C -1.068161 2.164342 -0.725500  
C -1.327620 2.941848 -1.865540  
C -0.992584 4.294233 -1.902882  
C -0.392707 4.879595 -0.783694  
C -0.132605 4.129403 0.364481  
C -0.467328 2.768407 0.395246  
O -0.225783 1.972805 1.493786  
C -0.020230 2.620796 2.754146  
H 0.004374 1.834743 3.515328  
H 0.933905 3.168254 2.771226  
H -0.851392 3.308242 2.975259  
H 0.342496 4.609019 1.218686  
H -0.120820 5.937700 -0.798513  
H -1.200201 4.888417 -2.795076  
H -1.807141 2.475945 -2.730530  
C -0.574754 -0.277896 -2.194915  
C 0.907922 0.105686 -2.156593  
P 1.675388 -0.143680 -0.457414  
C 2.894949 -1.510012 -0.629839  
C 4.181599 -1.403348 -0.080171  
C 5.067819 -2.484080 -0.097027  
C 4.668273 -3.691648 -0.670702  
C 3.394264 -3.824634 -1.231393  
C 2.507045 -2.739811 -1.213904  
O 1.254505 -2.782768 -1.738269  
C 0.738559 -4.004698 -2.241271  
H -0.293368 -3.800985 -2.555285  
H 1.314262 -4.357988 -3.113865  
H 0.728253 -4.789317 -1.466025  
H 3.100701 -4.773022 -1.680893  
H 5.351405 -4.544366 -0.690053  
H 6.065412 -2.377828 0.334246  
H 4.500307 -0.459756 0.367064  
C 2.744397 1.337968 -0.240607  
C 2.899746 1.887845 1.041817  
C 3.706816 3.011421 1.243405  
C 4.363612 3.603230 0.161125  
C 4.222540 3.058305 -1.119737  
C 3.423953 1.930112 -1.319905  
H 3.340663 1.509705 -2.324861  
H 4.742371 3.510953 -1.967679  
H 4.990205 4.485068 0.315266  
H 3.821650 3.425818 2.248327  
H 2.384552 1.438163 1.890850  
H 1.473390 -0.466057 -2.904446  
H 1.017790 1.174372 -2.389478  
H -1.056172 0.103062 -3.108967  
H -0.695854 -1.369484 -2.175213  
C 1.818642 -1.333701 2.757174  
C 0.851160 -1.014191 3.635008  
H 0.055492 -1.715565 3.899326  
H 0.874511 -0.071712 4.190639  
H 1.848693 -2.304350 2.255984  
H 2.658516 -0.663492 2.556472

<sup>9</sup>B-06

Geometry with 85 atoms:  
Total energy: -3274.498189870  
Cr -0.329435 -0.542682 0.990594  
C -0.390115 -2.391267 0.072784  
C -1.585542 -3.319127 0.284630  
C -1.765100 -3.916573 1.692786  
C -2.660603 -3.139012 2.667399

C -2.123177 -1.822119 3.238322  
 C -1.969308 -0.671274 2.239325  
 H -1.852589 0.283847 2.788812  
 H -2.901941 -0.576144 1.656171  
 H -1.173702 -2.020554 3.770268  
 H -2.824486 -1.505790 4.035626  
 H -2.891402 -3.804937 3.517700  
 H -3.629814 -2.941671 2.171639  
 H -2.211622 -4.918975 1.579289  
 H -0.774547 -4.091604 2.153285  
 H -2.517166 -2.810664 -0.014616  
 H -1.478767 -4.160200 -0.427791  
 H -0.289756 -2.189509 -1.008837  
 H 0.546830 -2.896698 0.373166  
 P -1.643051 0.457287 -0.830290  
 C -2.967094 -0.581677 -1.536641  
 C -2.720225 -1.384763 -2.662402  
 C -3.689341 -2.286142 -3.111580  
 C -4.911371 -2.396688 -2.442813  
 C -5.165303 -1.597229 -1.323467  
 C -4.199865 -0.697300 -0.868733  
 H -4.409474 -0.081286 0.007786  
 H -6.119818 -1.676047 -0.797681  
 H -5.666434 -3.103666 -2.794698  
 H -3.484920 -2.905329 -3.988300  
 H -1.771951 -1.324295 -3.199189  
 C -2.443353 1.997744 -0.263961  
 C -3.562809 2.548443 -0.905197  
 C -4.163688 3.713214 -0.424142  
 C -3.643793 4.330927 0.714829  
 C -2.523049 3.807499 1.366811  
 C -1.913055 2.647791 0.872742  
 O -0.787672 2.095875 1.432813  
 C -0.198020 2.736038 2.563732  
 H -0.864828 2.686814 3.439904  
 H 0.731840 2.199127 2.778804  
 H 0.048995 3.786734 2.343125  
 H -2.139944 4.308935 2.254273  
 H -4.112650 5.235221 1.110262  
 H -5.036159 4.129603 -0.931609  
 H -3.977190 2.048372 -1.783504  
 C -0.537293 0.961257 -2.250686  
 C 0.720606 0.909652 -2.360865  
 P 1.652044 0.087707 -0.740377  
 C 2.962021 -1.172400 -0.953074  
 C 3.023449 -2.068750 -2.028671  
 C 4.021243 -3.046767 -2.095921  
 C 4.973968 -3.130293 -1.080386  
 C 4.939648 -2.246774 0.004017  
 C 3.934955 -1.273995 0.071795  
 O 3.809829 -0.378051 1.085815  
 C 4.799730 -0.310622 2.100350  
 H 4.513239 0.519594 2.759365  
 H 4.841723 -1.241242 2.692325  
 H 5.795743 -0.101074 1.674805  
 H 5.691873 -2.324708 0.788662  
 H 5.759042 -3.889086 -1.124952  
 H 4.052136 -3.735808 -2.942407  
 H 2.291138 -2.010587 -2.834954  
 C 2.534711 1.703758 -0.815304  
 C 1.859693 2.856695 -0.380742  
 C 2.471296 4.111672 -0.463232  
 C 3.769597 4.226156 -0.967047  
 C 4.450563 3.081109 -1.395053  
 C 3.838238 1.827441 -1.324968  
 H 4.381174 0.943891 -1.668006  
 H 5.466259 3.164505 -1.790075  
 H 4.251753 5.205005 -1.026436  
 H 1.931010 5.000946 -0.128285  
 H 0.853061 2.773870 0.027522  
 H 0.452341 -0.950966 -2.592669  
 H 1.375768 0.455384 -3.166993  
 H -0.266219 2.010572 -2.058995  
 H -1.118424 0.950916 -3.185844  
 C 1.400928 -1.789155 2.662210  
 C 1.227886 -0.514877 3.051130  
 H 0.474333 -0.240919 3.795763  
 H 1.893816 0.269405 2.679185  
 H 0.784378 -2.601654 3.054299  
 H 2.193080 -2.064033 1.962701

<sup>49</sup>B-07  
 Geometry with 85 atoms:  
 Total energy: -3274.498004890  
 Cr -0.664895 -0.611240 1.136266  
 C -1.155102 -2.474079 0.399386  
 C -2.586384 -3.012115 0.443699  
 C -3.114445 -3.427583 1.827607  
 C -3.759834 -2.337526 2.693307  
 C -2.847739 -1.251673 3.275593  
 C -2.329423 -0.210999 2.279009  
 H -1.961645 0.680857 2.825329  
 H -3.163536 0.138673 1.645962  
 H -2.013465 -1.734686 3.819707  
 H -3.426393 -0.728488 4.062281  
 H -4.265367 -2.840938 3.536205  
 H -4.564190 -1.850148 2.110703  
 H -3.878012 -4.209655 1.675560  
 H -2.302881 -3.919377 2.397934  
 H -3.289433 -2.294057 -0.010224  
 H -2.628623 -3.904516 -0.210957  
 H -0.788846 -2.457870 -0.644430  
 H -0.491081 -3.174445 0.939890  
 P -1.557559 0.396227 -0.902252  
 C -3.218456 -0.028588 -1.521003  
 C -3.396314 -0.995922 -2.524148  
 C -4.684298 -1.377941 -2.909764  
 C -5.801652 -0.803496 -2.297830  
 C -5.630220 0.163254 -1.300982  
 C -4.346876 0.550351 -0.912088  
 H -4.224903 1.311553 -0.137923  
 H -6.500323 0.611960 -0.823008  
 H -6.807380 -1.106322 -2.599105  
 H -4.812387 -2.130275 -3.691760  
 H -2.538185 -1.465300 -3.008073  
 C -1.529915 2.219246 -0.755510  
 C -2.089733 3.035661 -1.750984  
 C -2.034767 4.426049 -1.656661  
 C -1.410916 5.009143 -0.550901  
 C -0.845842 4.219223 0.453282  
 C -0.899598 2.820415 0.355046  
 O -0.349200 1.990427 1.297652  
 C 0.097667 2.570575 2.526115  
 H 0.420989 1.745240 3.165359  
 H 0.954056 3.241210 2.361669  
 H -0.722324 3.112619 3.023183  
 H -0.366521 4.702115 1.303179  
 H -1.361364 6.096873 -0.459675  
 H -2.478488 5.048261 -2.436409  
 H -2.586562 2.569978 -2.605819  
 C -0.370065 0.061691 -2.291815  
 C 1.036808 0.535211 -1.911737  
 P 1.604029 -0.254375 -0.311294  
 C 2.666309 -1.646829 -0.849770  
 C 2.347492 -2.962111 -0.482991  
 C 3.159463 -4.037283 -0.856048  
 C 4.311987 -3.793096 -1.604011  
 C 4.654806 -2.493118 -1.989260  
 C 3.833813 -1.415888 -1.625142  
 O 4.076257 -0.133305 -1.971473  
 C 5.299604 0.221973 -2.595737  
 H 6.165341 -0.068163 -1.976190  
 H 5.395528 -0.232897 -3.596855  
 H 5.283471 1.315065 -2.699461  
 H 5.556878 -2.327059 -2.578170  
 H 4.959361 -4.622645 -1.899600  
 H 2.892351 -5.054356 -0.562212  
 H 1.444973 -3.150094 0.098021  
 C 2.780944 0.928904 0.464991  
 C 2.678635 2.319809 0.303733  
 C 3.545792 3.178501 0.986667  
 C 4.517914 2.663715 1.849216  
 C 4.620114 1.279663 2.023623  
 C 3.759039 0.419121 1.338216  
 H 3.864698 -0.660689 1.473457  
 H 5.378964 0.865148 2.692077  
 H 5.195329 3.336944 2.380024  
 H 3.459509 4.258174 0.838910  
 H 1.925421 2.754755 -0.355229  
 H 1.763333 0.299906 -2.700858  
 H 1.045377 1.627549 -1.788301  
 H -0.723953 0.566104 -3.205066

H -0.379678 -1.023246 -2.483204  
 C 0.798934 -0.845228 3.416229  
 C 0.749604 -2.121025 3.003523  
 H 1.521232 -2.538823 2.350193  
 H -0.033147 -2.805493 3.341897  
 H 1.622992 -0.186880 3.120424  
 H 0.058772 -0.447221 4.116803

<sup>49</sup>B-08  
 Geometry with 85 atoms:  
 Total energy: -3274.497355160  
 Cr -0.408998 -0.312724 1.177491  
 C -0.392094 -2.306607 0.618873  
 C -0.802646 -3.335889 1.673767  
 C -2.302620 -3.649782 1.751011  
 C -3.251163 -2.449652 1.885504  
 C -2.839238 -1.395112 2.932619  
 C -2.135608 -0.168724 2.344398  
 H -1.848362 0.534805 3.149761  
 H -2.859076 0.386732 1.718730  
 H -2.211615 -1.870237 3.708675  
 H -3.742831 -1.055942 3.473994  
 H -4.254814 -2.841408 2.121162  
 H -3.355286 -1.953937 0.909351  
 H -2.591771 -4.218563 0.848484  
 H -2.463276 -4.334976 2.603044  
 H -0.276712 -4.289452 1.473365  
 H -0.439900 -3.034112 2.672405  
 H -0.980477 -2.457688 -0.304712  
 H 0.666432 -2.453202 0.342373  
 P -1.641991 -0.337271 -0.830329  
 C -3.243846 -0.435728 -1.234420  
 C -3.279056 -1.633070 -1.970751  
 C -4.490358 -2.299603 -2.170939  
 C -5.674790 -1.781864 -1.638837  
 C -5.646611 -0.589349 -0.909029  
 C -4.439218 0.081034 -0.703631  
 H -4.430050 1.007935 -0.127010  
 H -6.569351 -0.178841 -0.492265  
 H -6.620246 -2.307075 -1.794189  
 H -4.506191 -3.229353 -2.744580  
 H -2.366342 -2.060244 -2.389671  
 C -1.954198 2.134881 -0.709388  
 C -2.733743 2.805271 -1.665846  
 C -2.965271 4.177119 -1.572826  
 C -2.412408 4.890122 -0.506370  
 C -1.626960 4.248516 0.454301  
 C -1.384835 2.871329 0.350060  
 O -0.588321 2.192273 1.246338  
 C -0.222869 2.864502 2.454904  
 H 0.379612 2.160353 3.036719  
 H 0.385282 3.757803 2.246034  
 H -1.116964 3.146722 3.032762  
 H -1.207247 4.831958 1.272117  
 H -2.591009 5.964081 -0.413599  
 H -3.577651 4.683491 -2.321588  
 H -3.180396 2.236308 -2.485209  
 C -0.603434 0.185536 -2.359955  
 C 0.764574 0.837700 -2.137658  
 P 1.647860 0.160502 -0.639695  
 C 2.506122 -1.336195 -1.276409  
 C 2.228342 -1.927976 -2.516454  
 C 2.881777 -3.094861 -2.926624  
 C 3.834336 -3.679398 -2.092136  
 C 4.137829 -3.109680 -0.851632  
 C 3.470787 -1.949232 -0.439065  
 O 3.691574 -1.330396 0.745891  
 C 4.719272 -1.783810 1.610686  
 H 4.731494 -1.094339 2.465321  
 H 4.524753 -2.807115 1.976174  
 H 5.704036 -1.753553 1.113920  
 H 4.889790 -3.574214 -0.213935  
 H 4.355185 -4.588044 -2.403816  
 H 2.648876 -3.537622 -3.897220  
 H 1.497752 -1.479978 -3.191093  
 C 2.997883 1.388388 -0.415031  
 C 4.136072 1.403642 -1.237617  
 C 5.123165 2.374331 -1.051281  
 C 4.985377 3.336746 -0.044280  
 C 3.856298 3.324902 0.779432  
 C 2.868901 2.352316 0.595423

H 1.990513 2.340338 1.239716  
H 3.745873 4.071286 1.570493  
H 5.760626 4.093562 0.098965  
H 6.006261 2.379514 -1.695257  
H 4.256440 0.650511 -2.020356  
H 1.402395 0.745628 -3.030410  
H 0.649896 1.916447 -1.944170  
H -1.137455 0.648601 -3.204712  
H -0.498728 -0.887529 -2.579430  
C 0.580644 -0.594242 3.675585  
C 1.592547 -0.713974 2.798917  
H 2.256732 0.121094 2.556235  
H 1.843469 -1.672947 2.341968  
H 0.368942 0.345232 4.194158  
H -0.034478 -1.447780 3.967529

<sup>49</sup>B-09

Geometry with 85 atoms:

Total energy: -3274.498526540

Cr -0.305096 -0.426777 1.136909  
C -0.283704 -2.387203 0.460896  
C -0.725642 -3.508071 1.402368  
C -2.232852 -3.778400 1.484377  
C -3.125350 -2.582968 1.852968  
C -2.583814 -1.687269 2.985819  
C -1.874342 -0.422883 2.493606  
H -1.426208 0.122066 3.349647  
H -2.623170 0.264958 2.055596  
H -1.914334 -2.276934 3.638308  
H -3.423510 -1.390287 3.642467  
H -4.120113 -2.975297 2.122733  
H -3.289921 -1.960389 0.962217  
H -2.578646 -4.189655 0.518571  
H -2.386540 -4.583274 2.225721  
H -0.239440 -4.450739 1.082943  
H -0.336343 -3.330918 2.419492  
H -0.836917 -2.458000 -0.494145  
H 0.785219 -2.508629 0.213846  
P -1.662812 0.324446 -0.766023  
C -3.290316 -0.417182 -1.120166  
C -3.384662 -1.593395 -1.884213  
C -4.619451 -2.226561 -2.046910  
C -5.766402 -1.697130 -1.448014  
C -5.678056 -0.525845 -0.688979  
C -4.447602 0.112353 -0.522512  
H -4.390576 1.024743 0.074826  
H -6.571592 -0.107020 -0.220002  
H -6.729830 -2.196892 -1.574021  
H -4.683133 -3.139903 -2.643168  
H -2.500537 -2.029374 -2.353108  
C -1.951477 2.128812 -0.658263  
C -2.655274 2.799546 -1.672758  
C -2.842911 4.179982 -1.627856  
C -2.318383 4.904896 -0.554078  
C -1.617191 4.261811 0.467487  
C -1.429931 2.871954 0.419288  
O -0.736839 2.191489 1.391924  
C -0.593006 2.825231 2.666462  
H -0.248823 2.059169 3.367368  
H 0.148030 3.639972 2.628142  
H -1.559870 3.215313 3.020203  
H -1.215758 4.850427 1.291251  
H -2.455345 5.987781 -0.504530  
H -3.396045 4.685837 -2.421732  
H -3.075121 2.224531 -2.502111  
C -0.682958 0.181279 -2.338890  
C 0.676604 0.869180 -2.170569  
P 1.608769 0.199263 -0.701452  
C 2.517183 -1.252934 -1.360632  
C 2.318192 -1.779417 -2.644612  
C 2.994880 -2.926616 -3.070670  
C 3.889345 -3.557964 -2.206549  
C 4.108863 -3.056586 -0.919717  
C 3.417487 -1.916426 -0.491342  
O 3.553093 -1.370502 0.744538  
C 4.557218 -1.852206 1.625794  
H 4.373356 -2.899109 1.921814  
H 5.559237 -1.770179 1.171651  
H 4.516245 -1.216904 2.519865  
H 4.812709 -3.561172 -0.258464  
H 4.428205 -4.451909 -2.529793

H 2.825392 -3.317753 -4.075932  
H 1.630182 -1.295322 -3.338657  
C 2.888210 1.482631 -0.405933  
C 4.180078 1.421181 -0.951401  
C 5.100632 2.439280 -0.687677  
C 4.741203 3.525975 0.116570  
C 3.455186 3.592967 0.661998  
C 2.535111 2.572830 0.407561  
H 1.534410 2.617306 0.841284  
H 3.169982 4.439322 1.292196  
H 5.464497 4.319581 0.319590  
H 6.105110 2.383884 -1.114810  
H 4.471207 0.577860 -1.581702  
H 1.284332 0.798109 -3.085486  
H 0.543445 1.944688 -1.971594  
H -1.259898 0.628649 -3.163351  
H -0.560717 -0.890002 -2.560382  
C 1.297404 -1.318367 3.080361  
C 1.704625 -0.051133 2.896029  
H 1.308860 0.762642 3.509378  
H 2.495930 0.201198 2.187113  
H 0.550331 -1.577155 3.835991  
H 1.745256 -2.140206 2.516320

<sup>49</sup>B-10

Geometry with 85 atoms:

Total energy: -3274.496944140

Cr -0.423601 -0.532759 1.129090  
C -0.715222 -2.477612 0.567168  
C -2.078832 -3.141435 0.386452  
C -2.872583 -3.463361 1.659272  
C -3.616334 -2.309982 2.345906  
C -2.776260 -1.308433 3.150064  
C -2.064261 -0.217479 2.350191  
H -1.652566 0.539818 3.045864  
H -2.811154 0.320571 1.739411  
H -2.060862 -1.869919 3.778401  
H -3.456307 -0.813647 3.871312  
H -4.347618 -2.761572 3.038676  
H -4.216265 -1.765056 1.593121  
H -3.627181 -4.223443 1.391650  
H -2.206391 -3.956092 2.393681  
H -2.720398 -2.545162 -0.282636  
H -1.920868 -4.098448 -0.149824  
H -0.130444 -2.543024 -0.368144  
H -0.128144 -3.029435 1.324306  
P -1.548184 0.316681 -0.870108  
C -3.236209 -0.152147 -1.379136  
C -3.446517 -1.102629 -2.392770  
C -4.743698 -1.508169 -2.718099  
C -5.839721 -0.973787 -2.035306  
C -5.636802 -0.025785 -1.026727  
C -4.343606 0.383964 -0.697334  
H -4.200083 1.131294 0.086202  
H -6.490175 0.398257 -0.492211  
H -6.852934 -1.293967 -2.289826  
H -4.895600 -2.247030 -3.508596  
H -2.604323 -1.542248 -2.929793  
C -1.589756 2.138519 -0.690258  
C -2.253877 2.953705 -1.620914  
C -2.263802 4.341540 -1.483562  
C -1.602952 4.923962 -0.398737  
C -0.934593 4.135786 0.541183  
C -0.922171 2.741193 0.396965  
O -0.257785 1.914548 1.271559  
C 0.256680 2.479116 2.483636  
H 0.632806 1.645537 3.084608  
H 1.085542 3.170698 2.272840  
H -0.540291 2.991518 3.044422  
H -0.422291 4.617651 1.371888  
H -1.604548 6.009446 -0.274166  
H -2.786577 4.962859 -2.213438  
H -2.782460 2.487517 -2.456302  
C -0.469439 0.033164 -2.353622  
O 0.915948 0.648868 -2.134224  
P 1.738324 0.025302 -0.563785  
C 3.050492 -1.098963 -1.223351  
C 3.958118 -0.587095 -2.168450  
C 4.966629 -1.375804 -2.719055  
C 5.080998 -2.709228 -2.317011  
C 4.206885 -3.242775 -1.370263

C 3.192730 -2.444096 -0.810280  
O 2.336537 -2.901242 0.135170  
C 2.379574 -4.264460 0.529315  
H 2.194235 -4.937775 -0.324742  
H 3.344480 -4.522087 0.998648  
H 1.576883 -4.398712 1.265086  
H 4.321800 -4.281792 -1.064208  
H 5.863746 -3.345274 -2.737839  
H 5.657914 -0.952794 -3.450801  
H 3.878909 0.460203 -2.472069  
C 2.754985 1.447112 0.031826  
C 2.408478 2.789997 -0.189043  
C 3.165446 3.823070 0.373817  
C 4.273381 3.532627 1.174310  
C 4.625380 2.198133 1.404303  
C 3.875918 1.165625 0.836726  
H 4.175878 0.129275 1.010955  
H 5.494485 1.958120 2.021927  
H 4.864119 4.340864 1.612085  
H 2.883124 4.861374 0.181402  
H 1.539742 3.055214 -0.792332  
H 1.565394 0.434819 -2.994727  
H 0.825397 1.741639 -2.066723  
H -0.951782 0.464771 -3.245018  
H -0.402241 -1.057002 -2.503464  
C 1.662164 -0.963012 2.698912  
C 0.622399 -1.278878 3.491520  
H 0.191921 -2.283440 3.498685  
H 0.203092 -0.568936 4.209906  
H 2.114837 -1.700891 2.031166  
H 2.144074 0.018821 2.746458

<sup>49</sup>B-11

Geometry with 85 atoms:

Total energy: -3274.497747700

Cr -0.293074 0.056835 1.128392  
C -0.377195 -1.995981 1.067977  
C -1.623517 -2.751277 1.522534  
C -1.938740 -2.711426 3.029456  
C -2.831427 -1.566998 3.531400  
C -2.230549 -0.157374 3.595517  
C -1.966980 0.523251 2.248949  
H -1.786960 1.606713 2.402826  
H -2.883259 0.454870 1.638766  
H -1.317501 -0.186361 4.219206  
H -2.938720 0.468918 4.173465  
H -3.169820 -1.831072 5.489668  
H -3.747512 -1.536912 2.912059  
H -2.451117 -3.652791 3.291708  
H -0.993337 -2.724895 3.605452  
H -2.509088 -2.410735 0.959834  
H -1.495583 -3.813343 1.234379  
H -0.149367 -2.245969 0.014313  
H 0.504411 -2.324709 1.647616  
P -1.596897 0.237712 -0.933529  
C -2.992953 -0.893179 -1.244562  
C -2.814917 -2.056115 -2.014244  
C -3.844886 -2.994247 -2.123038  
C -5.060115 -2.786405 -1.465484  
C -5.245285 -1.631360 -0.698772  
C -4.219830 -0.691484 -0.584147  
H -4.378515 0.199890 0.025153  
H -6.192624 -1.461020 -0.181673  
H -5.862364 -3.523463 -1.549381  
H -3.691937 -3.893964 -2.723700  
H -1.872090 -2.251057 -2.528263  
C -2.253630 1.947024 -0.952953  
C -3.418195 2.322033 -1.637288  
C -3.890641 3.635416 -1.580872  
C -3.195015 4.583361 -0.828677  
C -2.022729 4.237394 -0.148559  
C -1.545324 2.924604 -0.220428  
O -0.379293 2.517704 0.392037  
C 0.538617 3.518610 0.841995  
H 1.493641 3.014102 1.019737  
H 0.691784 4.285318 0.066725  
H 0.185886 3.992791 1.771896  
H -1.498474 4.993484 0.434962  
H -3.562699 5.610227 -0.764606  
H -4.800407 3.912789 -2.117225  
H -3.967588 1.574336 -2.213039

|                               |           |           |           |
|-------------------------------|-----------|-----------|-----------|
| C                             | -0.481949 | 0.157916  | -2.418250 |
| C                             | 0.830769  | 0.899366  | -2.132648 |
| P                             | 1.714250  | 0.167678  | -0.664957 |
| C                             | 2.438659  | -1.393229 | -1.336857 |
| C                             | 2.456868  | -1.682065 | -2.710376 |
| C                             | 2.943210  | -2.897388 | -3.198651 |
| C                             | 3.427443  | -3.848894 | -2.301927 |
| C                             | 3.435620  | -3.587448 | -0.930031 |
| C                             | 2.950790  | -2.364800 | -0.442219 |
| O                             | 2.957916  | -2.042175 | 0.877865  |
| C                             | 3.389852  | -3.006922 | 1.827665  |
| H                             | 3.274177  | -2.547311 | 2.817855  |
| H                             | 2.772447  | -3.919876 | 1.786324  |
| H                             | 4.451297  | -3.269990 | 1.682890  |
| H                             | 3.828299  | -4.339676 | -0.247560 |
| H                             | 3.810235  | -4.805602 | -2.665504 |
| H                             | 2.943113  | -3.093472 | -4.272870 |
| H                             | 2.085197  | -0.951775 | -3.429704 |
| C                             | 3.144334  | 1.296775  | -0.392653 |
| C                             | 3.410485  | 2.410939  | -1.207724 |
| C                             | 4.468418  | 3.274104  | -0.903286 |
| C                             | 5.276726  | 3.036077  | 0.211358  |
| C                             | 5.025774  | 1.924458  | 1.022521  |
| C                             | 3.966542  | 1.063754  | 0.726827  |
| H                             | 3.784982  | 0.194251  | 1.359933  |
| H                             | 5.657348  | 1.725643  | 1.891975  |
| H                             | 6.102753  | 3.712015  | 0.445228  |
| H                             | 4.663205  | 4.135463  | -1.547247 |
| H                             | 2.802895  | 2.622865  | -2.088772 |
| H                             | 1.470200  | 0.917822  | -3.027286 |
| H                             | 0.623168  | 1.946883  | -1.869986 |
| H                             | -1.005281 | 0.588626  | -3.286106 |
| H                             | -0.288409 | -0.902697 | -2.637992 |
| C                             | 1.307981  | -0.286733 | 3.215075  |
| C                             | 1.126053  | 1.041537  | 3.153357  |
| H                             | 0.332593  | 1.545905  | 3.712227  |
| H                             | 1.825916  | 1.669934  | 2.596390  |
| H                             | 0.668513  | -0.932649 | 3.822049  |
| H                             | 2.129508  | -0.762399 | 2.679730  |
| C                             | 0.703561  | 2.784589  | 2.149429  |
| H                             | 0.984938  | 2.051238  | 2.910355  |
| H                             | 1.613261  | 3.264432  | 1.759847  |
| H                             | 0.035488  | 3.532160  | 2.604850  |
| H                             | 0.263568  | 4.728923  | 0.657683  |
| H                             | -0.612085 | 5.895744  | -1.317407 |
| H                             | -1.841092 | 4.641598  | -3.099027 |
| H                             | -2.207252 | 2.195899  | -2.837769 |
| C                             | -0.465295 | -0.454917 | -2.209149 |
| C                             | 1.004450  | -0.027284 | -2.169670 |
| P                             | 1.803064  | -0.253091 | -0.479639 |
| C                             | 3.031761  | -1.598696 | -0.786892 |
| C                             | 4.423381  | -1.437519 | -0.729583 |
| C                             | 5.287344  | -2.519605 | -0.926632 |
| C                             | 4.761397  | -3.784248 | -1.189041 |
| C                             | 3.378710  | -3.970743 | -1.280507 |
| C                             | 2.517201  | -2.882266 | -1.094448 |
| O                             | 1.166260  | -2.961381 | -1.216214 |
| C                             | 0.543897  | -4.215705 | -1.450293 |
| H                             | 0.860448  | -4.648979 | -2.414444 |
| H                             | 0.756760  | -4.930267 | -0.637258 |
| H                             | -0.536328 | -4.025221 | -1.479101 |
| H                             | 2.981430  | -4.964000 | -1.503631 |
| H                             | 5.426886  | -4.638289 | -1.336610 |
| H                             | 6.367497  | -2.367005 | -0.876654 |
| H                             | 4.851631  | -0.453764 | -0.537591 |
| C                             | 2.824824  | 1.257971  | -0.189930 |
| C                             | 2.671066  | 2.451708  | -0.913080 |
| C                             | 3.389428  | 3.600699  | -0.563886 |
| C                             | 4.276350  | 3.581558  | 0.514473  |
| C                             | 4.438890  | 2.400650  | 1.247136  |
| C                             | 3.716901  | 1.256614  | 0.903066  |
| H                             | 3.870920  | 0.344667  | 1.483317  |
| H                             | 5.133118  | 2.367775  | 2.090571  |
| H                             | 4.839801  | 4.478639  | 0.782208  |
| H                             | 3.247579  | 4.516014  | -1.143609 |
| H                             | 1.978378  | 2.516165  | -1.751744 |
| H                             | 1.588993  | -0.599766 | -2.903657 |
| H                             | 1.086827  | 1.029817  | -2.453638 |
| H                             | -0.939267 | -0.136782 | -3.151029 |
| H                             | -0.548941 | -1.547759 | -2.136129 |
| C                             | 1.579105  | -0.702361 | 3.069142  |
| C                             | 0.543087  | -0.516115 | 3.905673  |
| H                             | -0.123319 | -1.331168 | 4.195975  |
| H                             | 0.355961  | 0.450903  | 4.381684  |
| H                             | 1.817377  | -1.685976 | 2.653831  |
| H                             | 2.277361  | 0.108953  | 2.851630  |
| H                             | -2.556887 | -1.908890 | -2.504268 |
| C                             | -1.459553 | 2.147375  | -0.742818 |
| C                             | -1.938639 | 2.994644  | -1.755041 |
| C                             | -1.822835 | 4.380419  | -1.648164 |
| C                             | -1.218760 | 4.929071  | -1.513971 |
| C                             | -0.724871 | 4.108515  | 0.503049  |
| C                             | -0.834810 | 2.715591  | 0.388004  |
| O                             | -0.325267 | 1.855765  | 1.333454  |
| C                             | 0.122834  | 2.399663  | 2.581152  |
| H                             | 0.400997  | 1.550147  | 3.211954  |
| H                             | 1.007725  | 3.037141  | 2.437674  |
| H                             | -0.685612 | 2.962930  | 3.072383  |
| H                             | -0.251746 | 4.562899  | 1.371844  |
| H                             | -1.124940 | 6.012932  | -0.412551 |
| H                             | -2.204369 | 5.026745  | -2.441086 |
| H                             | -2.421376 | 2.557656  | -2.632646 |
| C                             | -0.370882 | -0.049609 | -2.262814 |
| C                             | 1.036131  | 0.432917  | -1.905764 |
| P                             | 1.613455  | -0.264575 | -0.266401 |
| C                             | 2.661409  | -1.983360 | -0.728633 |
| C                             | 2.369131  | -2.976628 | -0.231528 |
| C                             | 3.166005  | -4.081140 | -0.546108 |
| C                             | 4.278536  | -3.906081 | -1.369606 |
| C                             | 4.598597  | -2.644565 | -1.728015 |
| C                             | 3.795440  | -1.537407 | -1.569691 |
| O                             | 4.030561  | -0.288438 | -2.026897 |
| C                             | 5.218729  | 0.000100  | -2.746520 |
| H                             | 5.207018  | 1.081838  | -2.934914 |
| H                             | 6.116891  | -0.252846 | -2.157432 |
| H                             | 5.251203  | -0.533582 | -3.712212 |
| H                             | 5.471294  | -2.532165 | -2.523898 |
| H                             | 4.912552  | -4.759220 | -1.624180 |
| H                             | 2.917215  | -5.067058 | -0.148422 |
| H                             | 1.498492  | -3.113386 | 0.408316  |
| C                             | 2.819664  | 0.966293  | 0.386020  |
| C                             | 2.638800  | 2.348795  | 0.216940  |
| C                             | 3.520285  | 3.259186  | 0.808527  |
| C                             | 4.590907  | 2.804678  | 1.583775  |
| C                             | 4.778726  | 1.429638  | 1.758147  |
| C                             | 3.902295  | 0.518111  | 1.164548  |
| H                             | 4.073464  | -0.552767 | 1.298149  |
| H                             | 5.617330  | 1.061830  | 2.354829  |
| H                             | 5.279492  | 3.517149  | 2.044349  |
| H                             | 3.367807  | 4.330959  | 0.656507  |
| H                             | 1.811948  | 2.737784  | -0.379166 |
| H                             | 1.760519  | 0.156606  | -2.683034 |
| H                             | 1.051831  | 1.529678  | -1.832791 |
| H                             | -0.732444 | 0.433511  | -3.184562 |
| H                             | -0.385317 | -1.137829 | -2.431852 |
| C                             | 1.356912  | -1.110937 | 2.986495  |
| C                             | 0.254991  | -1.240652 | 3.742914  |
| H                             | -0.279671 | -2.190279 | 3.828033  |
| H                             | -0.119296 | -0.416499 | 4.357492  |
| H                             | 1.775452  | -1.956608 | 2.433629  |
| H                             | 1.931304  | -0.180137 | 2.957392  |
| H                             | 99B-12    |           |           |
| Geometry with 85 atoms:       |           |           |           |
| Total energy: -3274.497296950 |           |           |           |
| Cr                            | -0.357844 | -0.299796 | 1.375819  |
| C                             | -0.706095 | -2.317146 | 1.429675  |
| C                             | -1.999029 | -2.953681 | 0.924668  |
| C                             | -3.185584 | -2.929783 | 1.896016  |
| C                             | -3.800092 | -1.569622 | 2.255506  |
| C                             | -2.962520 | -0.635274 | 3.150464  |
| C                             | -2.025512 | 0.331753  | 2.426946  |
| H                             | -1.585151 | 1.046818  | 3.149170  |
| H                             | -2.616588 | 0.955345  | 1.732067  |
| H                             | -2.405409 | -1.246237 | 3.884935  |
| H                             | -3.666781 | -0.035166 | 3.759317  |
| H                             | -4.748179 | -1.779167 | 2.779875  |
| H                             | -4.085577 | -1.037107 | 1.332236  |
| H                             | -3.986629 | -3.553517 | 1.461057  |
| H                             | -2.884805 | -3.440934 | 2.830674  |
| H                             | -2.315058 | -2.505879 | -0.032891 |
| H                             | -1.802136 | -4.018213 | 0.687297  |
| H                             | 0.156357  | -2.678720 | 0.846221  |
| H                             | -0.537811 | -2.618411 | 2.479652  |
| P                             | -1.411503 | 0.252087  | -0.780613 |
| C                             | -3.175167 | -0.010194 | -1.178999 |
| C                             | -3.590259 | -1.137231 | -1.908928 |
| C                             | -4.950164 | -1.371498 | -2.129893 |
| C                             | -5.907222 | -0.485151 | -1.628358 |
| C                             | -5.500365 | 0.644174  | -0.910311 |
| C                             | -4.143543 | 0.882258  | -0.684839 |
| H                             | -3.839669 | 1.769767  | -0.125656 |
| H                             | -6.243274 | 1.344472  | -0.521160 |
| H                             | -6.969968 | -0.671663 | -1.800714 |
| H                             | -5.260808 | -2.251568 | -2.698083 |
| H                             | -2.860865 | -1.843594 | -2.308886 |
| C                             | -1.169016 | 2.060537  | -0.948896 |
| C                             | -1.654729 | 2.748383  | -2.073305 |
| C                             | -1.457447 | 4.120537  | -2.219606 |
| C                             | -0.770981 | 4.818874  | -1.222215 |
| C                             | -0.277319 | 4.159089  | -0.095109 |
| C                             | -0.467022 | 2.776095  | 0.042440  |
| O                             | 0.025403  | 2.066092  | 1.112460  |
| H                             | 99B-13    |           |           |
| Geometry with 85 atoms:       |           |           |           |
| Total energy: -3274.496322970 |           |           |           |
| Cr                            | -0.712637 | -0.547634 | 1.212996  |
| C                             | -1.050972 | -2.503472 | 0.648534  |
| C                             | -2.404500 | -3.197973 | 0.804183  |
| C                             | -2.936705 | -3.215633 | 2.252129  |
| C                             | -4.010944 | -2.163588 | 2.574249  |
| C                             | -3.795946 | -0.769275 | 1.975207  |
| C                             | -2.450459 | -0.106137 | 2.271829  |
| H                             | -2.198933 | -0.226903 | 3.343156  |
| H                             | -2.533628 | 0.984106  | 2.101859  |
| H                             | -4.616353 | -0.123910 | 2.345422  |
| H                             | -3.957538 | -0.823067 | 0.888183  |
| H                             | -4.105179 | -2.081163 | 3.672439  |
| H                             | -4.988900 | -2.533315 | 2.217171  |
| H                             | -3.354469 | -4.208857 | 2.486616  |
| H                             | -2.083048 | -3.095330 | 2.940785  |
| H                             | -3.150890 | -2.737865 | 0.133655  |
| H                             | -2.303759 | -4.239896 | 0.444927  |
| H                             | -0.677234 | -2.610895 | -0.386689 |
| H                             | -0.311006 | -3.012518 | 1.299539  |
| P                             | -1.560707 | 0.325456  | -0.884780 |
| C                             | -3.215778 | -0.071138 | -1.538625 |
| C                             | -3.401323 | -1.256386 | -2.272528 |
| C                             | -4.678789 | -1.619730 | -2.705892 |
| C                             | -5.779569 | -0.811184 | -2.407055 |
| C                             | -5.601100 | 0.364546  | -1.671372 |
| C                             | -4.327506 | 0.733538  | -1.233985 |
| H                             | -4.202939 | 1.646338  | -0.648396 |
| H                             | -6.458788 | 0.997208  | -1.430718 |
| H                             | -6.777734 | -1.098666 | -2.746066 |
| H                             | -4.813471 | -2.541548 | -3.276684 |
| H                             | 99B-14    |           |           |
| Geometry with 85 atoms:       |           |           |           |
| Total energy: -3274.497267220 |           |           |           |
| Cr                            | -0.416744 | -0.872867 | 1.005104  |
| C                             | -0.697189 | -2.659124 | 0.035544  |
| C                             | -2.055104 | -3.285309 | -0.277384 |
| C                             | -2.843644 | -3.883337 | 0.895101  |
| C                             | -3.642092 | -2.912078 | 1.774452  |
| C                             | -2.852640 | -2.046589 | 2.763442  |
| C                             | -2.125025 | -0.832962 | 2.184042  |
| H                             | -1.786053 | -0.187664 | 3.016510  |
| H                             | -2.854027 | -0.225108 | 1.616342  |
| H                             | -2.158840 | -2.696574 | 3.326952  |
| H                             | -3.571939 | -1.680379 | 3.522543  |
| H                             | -4.360657 | -3.513231 | 2.358736  |
| H                             | -4.256305 | -2.258140 | 1.127498  |
| H                             | -3.562755 | -4.607598 | 0.474349  |
| H                             | -2.163024 | -4.481130 | 1.531888  |
| H                             | -2.704562 | -2.562609 | -0.797592 |
| H                             | -1.891099 | -4.100165 | -1.011090 |
| H                             | -0.138504 | -2.505400 | -0.903619 |
| H                             | -0.084677 | -3.360172 | 0.634454  |
| P                             | -1.397320 | 0.412112  | -0.832593 |
| C                             | -3.140227 | 0.188127  | -1.348280 |
| C                             | -3.487600 | -0.706265 | -2.375420 |



Geometry with 85 atoms:

Total energy: -3274.490361960  
Cr -0.157663 -0.409196 1.266792  
P -1.636676 0.233467 -0.792518  
P 1.728854 0.560879 -0.536093  
O -3.729039 0.801109 1.080415  
O 3.987808 -0.731320 0.708134  
C 1.272774 -1.377558 2.369756  
C 1.034265 -2.460917 1.357013  
C 0.450106 -3.795003 1.851928  
C -1.055297 -3.801149 2.147214  
C -1.563523 -2.646276 3.022270  
C -1.738979 -1.316391 2.285510  
H -2.082070 -0.539531 2.990598  
H -2.529978 -1.420610 1.524086  
H -0.902903 -2.531078 3.900021  
H -2.545269 -2.945452 3.437562  
H -1.299634 -4.764813 2.624414  
H -1.616493 -3.787500 1.195191  
H 0.665493 -4.573354 1.100651  
H 1.008641 -4.080122 2.759436  
H 0.298902 -2.103511 0.528238  
H 1.926551 -2.629268 0.736534  
H 2.261853 -4.914240 2.316961  
H 0.981860 -1.623526 3.396184  
C -2.838505 -1.024623 -1.371580  
C -2.447860 -2.373066 -1.317029  
C -3.308247 -3.377682 -1.765470  
C -4.573188 -3.043695 -2.260155  
C -4.969550 -1.703610 -2.311405  
C -4.107091 -0.695248 -1.871835  
H -4.425326 0.348273 -1.921206  
H -5.956853 -1.439186 -2.698318  
H -5.251225 -3.828644 -2.603996  
H -2.993670 -4.423086 -1.718426  
H -1.467400 -2.644185 -0.915999  
C -2.570069 1.809822 -0.681003  
C -2.337915 2.918156 -1.507433  
C -3.055145 4.107220 -1.338625  
C -4.026094 4.189902 -0.339631  
C -4.288710 3.096552 0.492080  
C -3.560278 1.911449 0.327226  
C -4.741299 0.745581 2.027217  
H -5.741911 0.895891 1.633062  
H -4.686196 -0.260034 2.508404  
H -4.573496 1.493452 2.867002  
H -5.055928 3.173481 1.262320  
H -4.594116 5.113227 -0.202057  
H -2.857484 4.959667 -1.991638  
H -1.596337 2.865170 -2.305584  
C -0.531952 0.444344 -2.274042  
C 0.746163 1.235254 -1.972753  
C 2.751402 -0.774080 -1.281144  
C 2.514878 -1.320972 -2.550139  
C 3.276325 -2.391147 -3.032577  
C 4.298066 -2.919473 -2.243523  
C 4.569554 -2.385000 -0.979640  
C 3.799378 -1.318727 -0.496658  
C 5.032897 -1.166608 1.562381  
H 4.996110 -0.518961 2.448167  
H 4.891114 -2.215621 1.875406  
H 6.018895 -1.056482 1.079644  
H 5.378246 -2.801356 -0.379434  
H 4.900484 -3.753863 -2.610831  
H 3.072698 -2.801324 -4.023846  
H 1.732788 -0.911372 -3.190396  
C 2.916063 1.940153 -0.241218  
C 4.153000 2.012975 -0.903497  
C 5.016266 3.086019 -0.670527  
C 4.656099 4.101905 0.221249  
C 3.424869 4.041015 0.879060  
C 2.561912 2.964456 0.652151  
H 1.608144 2.934249 1.180509  
H 3.134457 4.830041 1.577150  
H 5.334937 4.938718 0.403151  
H 5.976685 3.128794 -1.190471  
H 4.449820 1.227371 -1.601853  
H 1.390252 1.306166 -2.863767  
H 0.509633 2.270502 -1.680911  
H -1.099538 0.897804 -3.102200  
H -0.301727 -0.584935 -2.588883

C -0.653889 1.735402 2.216735  
C 0.258432 1.221074 3.076760  
H 1.324943 1.445334 2.988109  
H -0.048437 0.642556 3.951391  
H -0.368921 2.413682 1.407834  
H -1.725689 1.594551 2.370576

<sup>49</sup>B-18

Geometry with 85 atoms:

Total energy: -3274.489639270  
Cr -0.038706 -0.179892 1.444323  
P -1.587128 -0.189154 -0.653060  
P 1.607461 0.598575 -0.545490  
O -2.159158 2.711129 -0.348628  
O 2.143445 -2.257047 -0.835462  
C 1.502692 -0.334772 2.769943  
C 1.607069 -1.735501 2.239897  
C 1.307509 -2.890359 3.212236  
C -0.173389 -3.238756 3.412957  
C -1.123434 -2.065392 3.704880  
C -1.531808 -1.256020 2.468294  
H -2.341808 -0.554472 2.726537  
H -1.974996 -1.948850 1.731229  
H -0.688435 -1.415191 4.485814  
H -2.040093 -2.487660 4.159543  
H -0.234440 -3.973130 4.233294  
H -0.546009 -3.766539 2.514784  
H 1.829980 -3.795447 2.859302  
H 1.764180 -2.634117 4.182703  
H 0.890768 -1.882632 1.338739  
H 2.568912 -1.888249 1.728560  
H 2.384994 0.294016 2.594194  
H 1.148327 -0.243361 3.805041  
C -1.963821 -1.843457 -1.368559  
C -2.738007 -1.966527 -2.538113  
C -2.981900 -3.222338 -3.095767  
C -2.458314 -4.373236 -2.493961  
C -1.688567 -4.261282 -1.334271  
C -1.441622 -3.002139 -0.776723  
H -0.837153 -2.921975 0.126552  
H -1.280295 -5.155273 -0.857105  
H -2.653779 -5.355976 -2.930096  
H -3.585558 -3.304692 -4.002898  
H -3.162589 -1.077747 -3.011780  
C -3.229410 0.607544 -0.442175  
C -4.395554 -0.162127 -0.305819  
C -5.633150 0.433200 -0.047559  
C -5.714769 1.819633 0.081464  
C -4.567651 2.611407 -0.029680  
C -3.325024 2.012182 -0.275491  
C -2.168769 4.128813 -0.256076  
H -1.128107 4.453298 -0.390960  
H -2.790326 4.579841 -1.048216  
H -2.527555 4.468669 0.730281  
H -4.648971 3.691811 0.084804  
H -6.676996 2.299362 0.276545  
H -6.526209 -0.187505 0.049611  
H -4.338871 -1.247231 -0.405247  
C -0.757337 0.660923 -2.092142  
C 0.722276 0.271773 -2.152175  
C 3.255608 -0.177033 -0.808415  
C 4.445171 0.560654 -0.900359  
C 5.681700 -0.072715 -1.052535  
C 5.737520 -1.464577 -1.118701  
C 4.567356 -2.225883 -1.044598  
C 3.327588 -1.589428 -0.895065  
C 2.147150 -3.676787 -0.828487  
H 2.565289 -4.084706 -1.764163  
H 2.715643 -4.076146 0.029015  
H 1.100820 -3.991281 -0.748891  
H 4.630856 -3.311252 -1.109485  
H 6.697853 -1.972653 -1.235664  
H 6.593877 0.523704 -1.120677  
H 4.411789 1.649791 -0.853720  
C 1.956508 2.404398 -0.535140  
C 2.635134 2.935509 0.579271  
C 2.879705 4.305345 0.680519  
C 2.433526 5.173522 -0.322688  
C 1.757211 4.658753 -1.431382  
C 1.524392 3.282736 -1.542380  
H 1.005708 2.912564 -2.427733

H 1.413603 5.328338 -2.223875  
H 2.618055 6.247459 -0.241385  
H 3.415637 4.697961 1.548112  
H 2.978389 2.268612 1.374284  
H 0.836263 -0.809770 -2.321281  
H 1.243702 0.781007 -2.977622  
H -0.889012 1.738397 -1.939980  
H -1.272221 0.388001 -3.025742  
C -0.166752 2.287241 2.091896  
C -1.263763 1.752168 2.660219  
H -1.255213 1.395634 3.693796  
H -2.222656 1.722891 2.136264  
H 0.766447 2.395507 2.647972  
H -0.200599 2.708340 1.086871

<sup>49</sup>C-01

Geometry with 89 atoms:

Total energy: -3202.753274170  
Cr 0.034159 -0.991715 1.062167  
P -1.519296 0.396109 -0.366083  
C -2.789175 -0.676127 -1.126696  
C -2.576908 -1.281735 -2.375375  
C -3.503894 -2.197947 -2.879375  
C -4.645956 -2.521725 -2.140849  
C -4.864229 -1.918328 -0.898198  
C -3.941877 -1.000287 -0.391354  
H -4.127643 -0.528936 0.575893  
H -5.758739 -2.160910 -0.319528  
H -5.367153 -3.241748 -2.534692  
H -3.330101 -2.663481 -3.852500  
H -1.687924 -1.050102 -2.965919  
C -2.374977 1.805834 0.441503  
C -1.982885 2.079704 1.766770  
C -2.494279 3.170219 2.467587  
C -3.414297 4.011082 1.836856  
C -3.810952 3.746728 0.526175  
C -3.313803 2.651196 -0.201870  
C -3.828871 2.453778 -1.615024  
H -3.257099 1.679296 -2.139799  
C -5.318203 2.088070 -1.673527  
H -5.945178 2.865001 -1.208617  
H -5.645954 1.972664 -2.718794  
H -5.513960 1.139395 -1.151789  
H -3.664542 3.390744 -2.174728  
H -4.528342 4.413843 0.040611  
H -3.823653 4.875563 2.365401  
H -2.178063 3.359663 3.495858  
H -1.269202 1.420607 2.263560  
C -0.546780 1.162478 -1.769124  
C 0.758989 0.427600 -2.095498  
P 1.795690 0.226866 -0.556790  
C 3.325962 -0.635342 -1.104210  
C 3.347024 -1.306321 -2.343111  
C 4.454285 -2.057701 -2.737742  
C 5.561778 -2.152705 -1.892381  
C 5.549442 -1.492740 -0.663724  
C 4.448453 -0.729370 -0.242100  
C 4.535533 -0.035002 1.103765  
C 5.527993 1.134509 1.130981  
H 5.241864 1.917324 0.413756  
H 6.545575 0.798556 0.876766  
H 5.564569 1.589075 2.133842  
H 4.835527 -0.776820 1.863274  
H 3.545545 0.330955 1.411807  
H 6.416891 -1.571801 -0.002319  
H 6.433082 -2.742395 -2.187604  
H 4.447945 -2.568172 -3.703649  
H 2.493842 -1.251207 -3.019925  
C 2.255325 1.981416 -0.257413  
C 1.631711 2.684894 0.784818  
C 1.899322 4.043151 0.982811  
C 2.797375 4.706534 0.142253  
C 3.424946 4.011267 -0.898329  
C 3.155651 2.655795 -1.099999  
H 3.655817 2.118784 -1.910326  
H 4.129415 4.527498 -1.555164  
H 3.009928 5.767198 0.296912  
H 1.402028 4.581519 1.793210  
H 0.921467 2.181106 1.445129  
H 0.553471 -0.570563 -2.508246  
H 1.331847 0.989319 -2.849966

H -1.179765 1.236502 -2.665461  
H -0.334340 2.192789 -1.444176  
C -1.446842 -1.453278 2.404677  
C -1.443408 -2.796939 3.141022  
H -0.435710 -3.039969 3.526682  
C -1.964998 -3.996917 2.341855  
C -1.106343 -4.502755 1.173899  
C -1.098610 -3.648517 -0.107651  
C -0.007618 -2.588841 -0.227133  
H 0.996116 -3.037947 -0.096278  
H -0.032488 -2.150822 -1.239196  
H -0.979957 -4.332755 -0.970659  
H -2.092220 -3.190713 -0.246237  
H -0.068107 -4.667561 1.519185  
H -1.485528 -5.503319 0.906810  
H -2.095887 -4.834494 3.049137  
H -2.977855 -3.764877 1.962936  
H -2.075293 -2.706578 4.045960  
H -2.441746 -1.282073 1.960412  
H -1.291804 -0.628266 3.135749  
C 1.692839 -1.205655 3.124046  
C 2.034595 -2.234290 2.329727  
H 1.610572 -3.231762 2.479609  
H 2.777469 -2.130839 1.533944  
H 0.991168 -1.332468 3.953210  
H 2.160464 -0.220690 3.020792

<sup>40</sup>C-02

Geometry with 89 atoms:

Total energy: -3202.752662830  
Cr 0.112267 -0.973204 1.010447  
P -1.533514 0.355311 -0.358026  
C -2.768881 -0.765566 -1.107905  
C -2.562348 -1.338819 -2.372903  
C -3.461690 -2.284679 -2.871932  
C -4.570042 -2.670830 -2.112403  
C -4.781657 -2.101527 -0.852563  
C -3.887194 -1.153677 -0.350511  
H -4.067324 -0.710849 0.631311  
H -5.649614 -2.393974 -0.256737  
H -5.269953 -3.413412 -2.502757  
H -3.292566 -2.724187 -3.857876  
H -1.697410 -1.060674 -2.978320  
C -2.457585 1.691544 0.498035  
C -2.097551 1.924947 1.839651  
C -2.676500 2.953063 2.581380  
C -3.633987 3.770282 1.975797  
C -4.002466 3.542592 0.649956  
C -3.437658 2.509272 -0.118450  
C -3.932528 2.338947 -1.542023  
H -3.315109 1.618044 -2.090113  
C -5.398409 1.893148 -1.627995  
H -6.071228 2.611506 -1.133955  
H -5.713513 1.806992 -2.679965  
H -5.542658 0.912108 -1.151179  
H -3.816453 3.303896 -2.065098  
H -4.752784 4.188654 0.186005  
H -4.096745 4.586093 2.536638  
H -2.383839 3.111946 3.621736  
H -1.357514 1.279657 2.314919  
C -0.638029 1.191101 -1.774559  
C 0.700402 0.535043 -2.133180  
P 1.777266 0.368998 -0.619100  
C 3.348820 -0.376661 -1.213035  
C 3.377270 -1.048757 -2.449194  
C 4.529557 -1.703140 -2.887720  
C 5.672330 -1.691290 -2.088213  
C 5.653924 -1.029351 -0.858417  
C 4.509647 -0.363928 -0.392174  
C 4.537785 0.371112 0.936314  
C 5.497798 -0.172162 1.994944  
H 5.353036 0.362356 2.946756  
H 5.551968 -0.036535 1.708878  
H 5.335199 -1.245742 2.181809  
H 3.519306 0.388540 1.353839  
H 4.769511 1.433367 0.743055  
H 6.557880 -1.032244 -0.247527  
H 6.581831 -2.199399 -2.417975  
H 4.529017 -2.219213 -3.850627  
H 2.494249 -1.074660 -3.088582  
C 2.126353 2.141321 -0.280335

C 1.382630 2.795578 0.713966  
C 1.563241 4.161327 0.953454  
C 2.499712 4.881209 0.206310  
C 3.249027 4.234528 -0.783962  
C 3.062498 2.872361 -1.031005  
H 3.653597 2.375318 -1.804868  
H 3.982856 4.795233 -1.368287  
H 2.647860 5.947335 0.394865  
H 0.971000 4.659493 1.724901  
H 0.644323 2.244198 1.301117  
H 0.541420 -0.467804 -2.554717  
H 1.226775 1.135324 -2.891706  
H -1.291699 1.229303 -2.658101  
H -0.483971 2.231242 -1.448516  
C -1.293097 -1.523121 2.397569  
C -1.226636 -2.894167 3.078920  
H -2.01305 -3.119898 3.426440  
C -1.734241 -4.081428 2.251644  
C -0.879990 -4.539891 1.060979  
C 0.915780 -3.664945 -0.204619  
C 0.113656 -2.544364 -0.305470  
H 1.141719 -2.939813 -0.184697  
H 0.060408 -2.090392 -1.309678  
H -0.756923 -4.327546 -1.078059  
H -1.933084 -3.262038 -0.338983  
H 0.167533 -4.682880 1.387793  
H -1.235700 -5.545302 0.779675  
H -1.837750 -4.940449 2.937274  
H -2.756846 -3.861382 1.892465  
H -1.833536 -2.857044 4.004598  
H -2.313490 -1.357084 2.011934  
H -1.119021 -0.726016 3.154836  
C 1.851734 -1.171081 3.062932  
C 2.249602 -2.149521 2.232708  
H 1.907426 -3.180386 2.363835  
H 2.965650 -1.970164 1.425565  
H 1.180919 -1.372078 3.902664  
H 2.237558 -0.149085 2.975640

<sup>40</sup>C-03

Geometry with 89 atoms:

Total energy: -3202.754187780  
Cr 0.179948 -0.983538 1.265298  
P -1.571672 0.241306 -0.291741  
C -2.839374 -0.955731 -0.858924  
C -2.587567 -1.812867 -1.944087  
C -3.507371 -2.807228 -2.287471  
C -4.684983 -2.961600 -1.549607  
C -4.941900 -2.112445 -0.469025  
C -4.026035 -1.115500 -0.122782  
H -4.243684 -0.454759 0.719175  
H -5.862363 -2.223788 0.109111  
H -5.401687 -3.741348 -1.817573  
H -3.301301 -3.464353 -3.135918  
H -1.672103 -1.716852 -2.532362  
C -2.492779 1.699376 0.347686  
C -2.208904 2.058655 1.679770  
C -2.785617 3.180561 2.272968  
C -3.662947 3.967915 1.523882  
C -3.965538 3.610358 0.210030  
C -3.408586 2.475685 -0.406286  
C -3.851505 2.151947 -1.820298  
H -3.264113 1.325439 -2.235722  
C -5.339572 1.789133 -1.922067  
H -5.569174 0.893439 -1.325039  
H -5.984832 2.607503 -1.566320  
H -5.613221 1.577595 -2.967912  
H -3.647137 3.028441 -2.459561  
H -4.660095 4.229775 -0.363962  
H -4.117975 4.858673 1.964169  
H -2.551239 3.436093 3.308971  
H -1.527793 1.439978 2.263444  
C -0.692437 0.812179 -1.843748  
C 0.647492 0.103118 -2.074282  
P 1.732406 0.198272 -0.559820  
C 3.308673 -0.612069 -1.047992  
C 3.419480 -1.290728 -2.277403  
C 4.582335 -1.984315 -2.615613  
C 5.656077 -2.009845 -1.723198  
C 5.555131 -1.340687 -0.503425  
C 4.396195 -0.636959 -0.139153

C 4.375218 0.070366 1.201391  
C 5.324216 1.272404 1.286737  
H 6.366858 0.973332 1.096047  
H 5.283500 1.727780 2.289084  
H 5.054879 2.045031 0.951887  
H 6.464937 -0.658930 1.983235  
H 3.354827 0.404170 1.438661  
H 6.396186 -1.366352 0.195111  
H 6.570374 -2.552543 -1.975433  
H 4.646702 -2.501462 -3.575886  
H 2.597921 -1.284130 -2.994187  
C 2.086078 2.002195 -0.488229  
C 1.269754 2.827006 0.304976  
C 1.472123 4.209859 0.332877  
C 2.498220 4.781129 -0.425157  
C 3.314883 3.967149 -1.218058  
C 3.110604 2.585292 -1.253708  
H 3.756653 1.959332 -1.873791  
H 4.117242 4.410660 -1.812839  
H 2.662692 5.861100 -0.399477  
H 0.825461 4.838238 0.950205  
H 0.459969 2.395911 0.896298  
H 0.491799 -0.964461 -2.296901  
H 1.166015 0.552648 -2.935909  
H -1.343345 0.675688 -2.719191  
H -0.539040 1.895880 -1.725287  
C -1.363425 -1.826615 2.393589  
C -1.521955 -3.351521 2.442816  
H -0.677626 -3.817665 2.982019  
C -1.695334 -4.031346 1.073944  
C -0.411193 -4.258086 0.263727  
C 0.495837 -3.026326 0.090592  
C 1.384477 -2.645668 1.237103  
H 1.308452 3.288023 2.121014  
H 2.428539 -2.445614 0.967676  
H 1.065815 -3.071670 -0.852278  
H -0.239699 -2.164001 -0.160454  
H 0.193785 -5.053396 0.730490  
H -0.693218 -4.629148 -0.735448  
H -2.174490 -5.014602 1.213596  
H -2.402038 -3.436012 0.471036  
H -2.416732 -3.589401 3.049136  
H -2.304666 -1.386336 2.020603  
H -1.228052 -1.430498 3.416680  
C 0.944601 0.429254 3.101006  
C 1.523762 -0.762818 3.380519  
H 1.019096 -1.513740 3.992890  
H 2.556964 -0.977348 3.102861  
H -0.033654 0.685733 3.517016  
H 1.497549 1.227876 2.598705

<sup>40</sup>C-04

Geometry with 89 atoms:

Total energy: -3202.749827950  
Cr -0.197296 -1.295828 1.122632  
P -1.539298 0.268893 -0.331134  
C -3.208210 -0.232821 -0.890167  
C -3.397267 -0.931921 -2.094284  
C -4.666910 -1.396933 -2.446522  
C -5.758007 -1.171143 -1.602407  
C -5.577252 -0.471212 -0.405363  
C -4.310707 -0.004434 -0.047798  
H -4.183701 0.543238 0.888391  
H -6.426943 -0.286474 0.256174  
H -6.749321 -1.538151 -1.878673  
H -4.802121 -1.939179 -3.385408  
H -2.559572 -1.127374 -2.767036  
H -1.786937 1.816875 0.635268  
C -1.438189 1.761752 1.999676  
C -1.581529 2.866968 2.836180  
C -2.092931 4.055386 2.308653  
C -2.451087 4.118235 0.962363  
C -2.310856 3.017680 0.098306  
C -2.708962 3.200807 -1.352004  
H -3.726251 3.626257 -1.378981  
C -1.761333 4.131749 -2.122440  
H -1.752211 5.142673 -1.685897  
H -0.722910 3.764216 -2.107228  
H -2.075777 4.223447 -3.174117  
H -2.784940 2.231917 -1.862780  
H -2.860357 5.049496 0.561198

H -2.221052 4.931974 2.948430  
 H -1.303360 2.797764 3.890236  
 H -1.041401 0.836904 2.428415  
 C -0.554505 0.708157 -1.859911  
 C 0.685058 -0.177596 -2.025750  
 P 1.700399 -0.135943 -0.461960  
 C 3.235445 -1.070434 -0.862045  
 C 3.299921 -1.870935 -2.019558  
 C 4.426107 -2.647072 -2.296764  
 C 5.507138 -2.637458 -1.412847  
 C 5.448985 -1.852963 -0.260753  
 C 4.327541 -1.064057 0.041614  
 C 4.358235 -0.221679 1.301270  
 C 5.263926 1.011676 1.189040  
 H 6.304569 0.718651 0.978183  
 H 5.258209 1.586658 2.128753  
 H 4.931259 1.677763 0.379579  
 H 4.703551 -0.849850 2.139720  
 H 3.340956 0.103744 1.564714  
 H 6.294572 -1.850669 0.433054  
 H 6.393116 -3.243117 -1.618294  
 H 4.454647 -3.258031 -3.202086  
 H 2.467162 -1.901497 -2.722935  
 C 2.185784 1.638392 -0.426619  
 C 1.755828 2.454990 0.628990  
 C 2.050770 3.822010 0.633870  
 C 2.784939 4.380754 -0.415397  
 C 3.227759 3.570139 -1.468411  
 C 2.930442 2.205869 -1.475548  
 H 3.289037 1.577682 -2.295202  
 H 3.809569 4.003557 -2.285598  
 H 3.016947 5.448610 -0.413599  
 H 1.701046 4.448058 1.458226  
 H 1.177292 2.033139 1.452428  
 H 0.398345 -1.222419 -2.218414  
 H 1.285637 0.170142 -2.880682  
 H -1.199864 0.648677 -2.747727  
 H -0.254186 1.759129 -1.753216  
 C -1.862804 -1.840106 2.211357  
 C -2.426548 -3.262541 2.102007  
 H -1.655891 -4.008353 2.371308  
 C -3.044142 -3.637295 0.738976  
 C -2.117433 -4.306344 -0.286280  
 C -0.979399 -3.471178 -0.885187  
 C 0.109076 -3.027676 0.087387  
 H 0.252527 -3.766813 0.895735  
 H 1.081514 -2.901595 -0.418792  
 H -0.512043 -4.074290 -1.687906  
 H -1.411451 -2.600192 -1.409891  
 H -1.679248 -5.213769 0.170085  
 H -2.744540 -4.664336 -1.121669  
 H -3.872703 -4.342571 0.920864  
 H -3.511895 -2.744587 0.289814  
 H -3.213177 -3.375671 2.872392  
 H -2.675060 -1.116569 2.017152  
 H -1.532673 -1.654111 3.254004  
 C 1.316999 -1.133092 3.344075  
 C 1.706171 -2.280882 2.764030  
 H 1.283290 -3.241248 3.074198  
 H 2.486954 -2.310018 1.997946  
 H 0.573514 -1.124813 4.147279  
 H 1.776814 -0.172365 3.089074

C -3.201824 2.795367 2.443016  
 C -4.124899 3.558600 1.724661  
 C -4.318782 3.313489 0.364862  
 C -3.604023 2.319686 -0.326270  
 C -3.886348 2.145068 -1.804546  
 H -4.979931 2.125128 -1.945452  
 C -3.297312 3.268415 -2.669089  
 H -3.713673 4.248035 -2.385853  
 H -2.203780 3.334550 -2.562709  
 H -3.526099 3.101556 -3.733795  
 H -3.529100 1.168800 -2.157237  
 H -5.055298 3.905956 -0.185462  
 H -4.703557 4.339089 2.224980  
 H -3.049804 2.963595 3.511678  
 H -1.778945 1.187861 2.342712  
 C -0.729881 0.926538 -1.781938  
 C 0.622833 0.257368 -2.050071  
 P 1.685633 0.240302 -0.517016  
 C 3.264077 -0.543724 -1.042487  
 C 3.392853 -1.115067 -2.324106  
 C 4.554157 -1.792706 -2.697752  
 C 5.608427 -1.910498 -1.789565  
 C 5.491963 -1.343510 -0.520559  
 C 4.335118 -0.655677 -0.120454  
 C 4.301237 -0.053961 1.270638  
 C 5.265606 1.123504 1.462992  
 H 6.307133 0.823799 1.267288  
 H 5.213826 1.501673 2.496479  
 H 5.021049 1.954815 0.785394  
 H 4.551264 -0.845322 1.998229  
 H 3.281876 0.275444 1.516664  
 H 6.319137 -1.438162 0.188571  
 H 6.520434 -2.443730 -2.068814  
 H 4.632679 -2.225235 -3.697989  
 H 2.587774 -1.035128 -3.055195  
 C 2.043148 2.036034 -0.329742  
 C 1.183499 2.827538 0.452966  
 C 1.388660 4.206410 0.557191  
 C 2.457690 4.807217 -0.114000  
 C 3.315540 4.027180 -0.896906  
 C 3.109756 2.649495 -1.008703  
 H 3.786036 2.049608 -1.622272  
 H 4.150846 4.493726 -1.424981  
 H 2.622972 5.883934 -0.027928  
 H 0.711002 4.809518 1.166401  
 H 0.340347 2.373875 0.978639  
 H 0.490577 -0.788803 -2.366482  
 H 1.149518 0.785135 -2.860719  
 H -1.369999 0.863569 -2.673374  
 H -0.584275 1.994952 -1.563511  
 C -1.447595 -1.877238 2.314526  
 C -1.554640 -3.406740 2.374775  
 H -0.706912 -3.841447 2.934578  
 C -1.680309 -4.100248 1.006883  
 C -0.375216 -4.292087 0.220843  
 C 0.499914 -3.034416 0.071807  
 C 1.361021 -2.645820 1.235283  
 H 1.282191 -3.296607 2.112602  
 H 2.404541 -2.419470 0.986132  
 H 1.082221 -3.051190 -0.864296  
 H -0.260663 -2.192784 -0.173560  
 H 0.241505 -5.072734 0.696796  
 H -0.628271 -4.666409 -0.784651  
 H -2.133005 -5.096356 1.143259  
 H -2.392195 -3.528484 0.387017  
 H -2.453654 -3.669111 2.964536  
 H -2.387404 -1.479036 1.894387  
 H -1.373105 -1.463556 3.337331  
 C 0.861432 0.393898 3.106075  
 C 1.383603 -0.815590 3.421314  
 H 0.823394 -1.547255 4.008862  
 H 2.423308 -1.064863 3.202889  
 H -0.126136 0.692324 3.468383  
 H 1.469918 1.168328 2.631108

C -2.243890 -1.751187 -2.238648  
 C -3.159990 -2.728505 -2.635409  
 C -4.357820 -2.896185 -1.934001  
 C -4.639564 -2.080088 -0.833915  
 C -3.728728 -1.098937 -0.435037  
 H -3.959227 -0.465947 0.424868  
 H -5.574106 -2.206031 -0.282172  
 H -5.070909 -3.663447 -2.244382  
 H -2.933075 -3.365046 -3.494007  
 H -1.306438 -1.651634 -2.790364  
 C -2.207987 1.756003 0.044629  
 C -1.900942 2.240231 1.330011  
 C -2.480474 3.406771 1.825557  
 C -3.381763 4.111534 1.025824  
 C -3.688161 3.642779 -0.251740  
 C -3.119857 2.468892 -0.776227  
 C -3.522466 2.062093 -2.182265  
 H -2.922541 1.216310 -2.537858  
 C -5.007069 1.697975 -2.316767  
 H -5.659797 2.538494 -2.033886  
 H -5.243829 1.426056 -3.357612  
 H -5.263993 0.840563 -1.676873  
 H -3.295417 2.903705 -2.859802  
 H -4.387143 4.208885 -0.873399  
 H -3.844591 5.030864 1.393204  
 H -2.224282 3.762026 2.826173  
 H -1.191188 1.699763 1.954482  
 C -0.297926 0.850185 -1.983758  
 C 1.142052 0.330025 -2.044488  
 P 1.958600 0.338582 -0.702321  
 C 3.761962 0.077086 -0.659084  
 C 4.667336 1.119826 -0.377977  
 C 6.043071 0.932916 -0.512467  
 C 6.536161 -0.306788 -0.926411  
 C 5.646794 -1.344836 -1.202485  
 C 4.257254 -1.182980 -1.057547  
 C 3.363724 -2.353749 -1.424694  
 C 3.263170 -2.607606 -2.935388  
 H 2.892228 -1.718921 -3.470503  
 H 2.582155 -3.447336 -3.147814  
 H 4.247948 -2.855646 -3.361362  
 H 2.357647 -2.207809 -1.008240  
 H 3.756919 -3.261582 -0.936708  
 H 6.034821 -2.316321 -1.521781  
 H 7.612193 -0.466906 -1.029479  
 H 6.726277 1.755982 -0.289952  
 H 4.298768 2.091600 -0.047051  
 C 1.817526 2.081751 0.198754  
 C 1.692560 2.322776 1.579146  
 C 1.545616 3.623922 2.066643  
 C 1.514706 4.701719 1.177790  
 C 1.647896 4.475619 -0.196465  
 C 1.805037 3.176014 -0.683742  
 H 1.925836 3.020563 -1.758312  
 H 1.632966 5.316918 -0.893606  
 H 1.389823 5.719411 1.555124  
 H 1.449668 3.794785 3.141509  
 H 1.719507 1.490946 2.289296  
 H 1.163829 -0.715700 -2.383867  
 H 1.734516 0.911277 -2.768173  
 H -0.835041 0.593524 -2.907859  
 H -0.307807 1.945956 -1.906971  
 C -1.285333 -0.982384 2.620754  
 C -1.615311 -2.168169 3.530250  
 H -0.726573 -2.503079 4.092663  
 C -2.249509 -3.385125 2.846507  
 C -1.364007 -4.224233 1.910880  
 C -1.128257 -3.674924 0.493337  
 C 0.046183 -2.724080 0.296431  
 H 0.989172 -3.205537 0.620357  
 H 0.157817 -2.481771 -0.777372  
 H -0.960874 -4.538961 -0.179487  
 H -2.059665 -3.213881 0.131196  
 H -0.394511 -4.435314 2.401395  
 H -1.852910 -5.206975 1.802688  
 H -2.618457 -4.052847 3.644430  
 H -3.148617 -3.062465 2.289182  
 H -2.325595 -1.823748 4.307267  
 H -2.211879 -0.662860 2.109999  
 H -0.966789 -0.115379 3.243212  
 C 2.625433 -1.411459 2.275445

49C-05

Geometry with 89 atoms:  
 Total energy: -3202.754868930  
 Cr 0.126699 -1.005116 1.252706  
 P -1.616297 0.215435 -0.296553  
 C -2.791426 -1.023676 -0.971598  
 C -2.425910 -1.846164 -2.051299  
 C -3.275392 -2.869554 -2.479609  
 C -4.495921 -3.087234 -1.832985  
 C -4.867477 -2.270110 -0.761093  
 C -4.021974 -1.244807 -0.330004  
 H -4.326835 -0.610379 0.504942  
 H -5.822540 -2.430184 -0.254909  
 H -5.157676 -3.889899 -2.166741  
 H -2.981207 -3.499230 -3.322874  
 H -1.476556 -1.698147 -2.569103  
 C -2.655972 1.559432 0.404123  
 C -2.481357 1.802752 1.780262

49C-06

Geometry with 89 atoms:  
 Total energy: -3202.751077030  
 Cr 0.206214 -0.902689 1.202485  
 P -1.287651 0.260136 -0.500735  
 C -2.524784 -0.925198 -1.138207



C 1.671637 -1.804527 3.140165  
H 1.363994 -1.176453 3.981691  
H 1.234561 -2.804444 3.088771  
H 3.140588 -0.451427 2.377065  
H 2.994978 -2.069317 1.484238

<sup>49</sup>C-07

Geometry with 89 atoms:

Total energy: -3202.749829700  
Cr -0.051457 -1.178416 1.157261  
P -1.525590 0.214964 -0.358481  
C -3.174805 -0.401348 -0.851908  
C -3.362755 -1.154517 -2.022798  
C -4.610801 -1.715994 -2.305703  
C -5.680253 -1.535873 -1.423558  
C -5.500630 -0.784399 -0.258084  
C -4.256212 -0.219773 0.028837  
H -4.130764 0.369015 0.939777  
H -6.333234 -0.635237 0.433476  
H -6.653902 -1.979195 -1.645252  
H -4.745984 -2.298976 -3.219763  
H -2.539853 -1.319215 -2.721898  
C -1.823721 1.794859 0.538528  
C -1.378806 1.841417 1.874352  
C -1.466733 3.006090 2.634694  
C -2.005794 4.155774 2.052149  
C -2.471251 4.114264 0.737911  
C -2.410091 2.945647 -0.041851  
C -3.009921 2.989171 -1.433636  
H -2.768385 2.081025 -1.998969  
C -4.536045 3.159834 -1.421986  
H -4.837689 4.086559 -0.909161  
H -4.926257 3.203239 -2.451061  
H -5.023223 2.315866 -0.910420  
H -2.554183 3.828862 -1.986147  
H -2.902634 5.016310 0.295594  
H -2.071211 5.084488 2.624334  
H -1.112607 3.016458 3.667963  
H -0.945606 0.951016 2.340789  
C -0.582017 0.655386 -1.915836  
C 0.714300 -0.150522 -2.056116  
P 1.746259 -0.017689 -0.509568  
C 3.287802 -0.948537 -0.899707  
C 3.371309 -1.743883 -2.059465  
C 4.504327 -2.513999 -2.325337  
C 5.573702 -2.503470 -1.427564  
C 5.498645 -1.720690 -0.275294  
C 4.370542 -0.936444 0.014819  
C 4.388246 -0.087752 1.270317  
C 5.284299 1.152651 1.155077  
H 5.275748 1.728603 2.094174  
H 4.945799 1.815594 0.345518  
H 6.326814 0.867078 0.943143  
H 4.736889 -0.708131 2.113202  
H 3.367169 0.229695 1.528944  
H 6.336541 -1.715332 0.427745  
H 6.464177 -3.105769 -1.623249  
H 4.546736 -3.121328 -3.232599  
H 2.550183 -1.774515 -2.776078  
C 2.231690 1.755617 -0.549215  
C 1.783241 2.623610 0.456884  
C 2.109938 3.982849 0.417361  
C 2.892404 4.482435 -0.626854  
C 3.348967 3.621063 -1.632472  
C 3.021339 2.264441 -1.595481  
H 3.394724 1.595309 -2.375166  
H 3.966475 4.008322 -2.446682  
H 3.151097 5.543702 -0.658290  
H 1.748024 4.649303 1.203993  
H 1.165344 2.247737 1.274070  
H 0.491321 -1.216404 -2.215022  
H 1.287346 0.207141 -2.925947  
H -1.225167 0.504664 -2.794820  
H -0.362072 1.731910 -1.860610  
C -1.655695 -1.822060 2.285568  
C -2.139078 -3.276587 2.218378  
H -1.324047 -3.969567 2.497842  
C -2.749418 -3.725223 0.875439  
C -1.792117 -4.348444 -0.150382  
C -0.714186 -3.448817 -0.765894  
C 0.358567 -2.937678 0.192657

H 0.531481 -3.651628 1.016236  
H 1.324088 -2.789805 -0.319293  
H -0.221339 -4.022943 -1.574467  
H -1.206610 -2.607502 -1.285977  
H -1.293978 -5.220975 0.312283  
H -2.402848 -4.754083 -0.976069  
H -3.522909 -4.483046 1.086361  
H -3.285444 -2.878103 0.414994  
H -2.909149 -3.413201 3.001573  
H -2.512217 -1.151812 2.086575  
H -1.332242 -1.596348 3.321162  
C 1.741379 -2.029648 2.894646  
C 1.366547 -0.814073 3.330470  
H 1.893828 0.092849 3.017315  
H 0.576976 -0.693599 4.078299  
H 2.569473 -2.158782 2.190783  
H 1.256763 -2.938642 3.263593

<sup>49</sup>C-08

Geometry with 89 atoms:

Total energy: -3202.749630560  
Cr -0.205917 -1.377277 1.061286  
P -1.492740 0.310297 -0.338012  
C -3.174920 -0.107575 -0.935046  
C -3.373979 -0.742058 -2.173453  
C -4.655625 -1.136091 -2.566308  
C -5.750654 -0.902917 -1.729323  
C -5.560703 -0.266445 -0.498853  
C -4.281775 0.129571 -0.100941  
H -4.150005 0.633689 0.858703  
H -6.413169 -0.074316 0.156973  
H -6.751895 -1.213045 -2.037813  
H -4.796805 -1.627890 -3.531777  
H -2.535165 -0.939138 -2.844296  
C -1.703480 1.830760 0.680985  
C -1.357902 1.720282 2.042657  
C -1.487923 2.794561 2.920461  
C -1.979651 4.009690 2.437188  
C -2.329881 4.129355 1.092811  
C -2.204289 3.060299 0.187924  
C -2.591759 3.309855 -1.255452  
H -3.604208 3.747360 -1.270365  
C -1.627786 4.262346 -1.977851  
H -1.932586 4.403629 -3.026878  
H -1.610208 5.253064 -1.497424  
H -0.593843 3.882378 -1.970128  
H -2.674800 2.365830 -1.809346  
H -2.721323 5.081957 0.725465  
H -2.097573 4.862932 3.109689  
H -1.214396 2.681065 3.971885  
H -0.975903 0.774218 2.435098  
C -0.492964 0.775265 -1.851517  
C 0.730101 -0.128962 -2.036413  
P 1.721183 -0.155505 -0.457428  
C 3.268669 -1.062979 -0.863593  
C 3.324253 -1.869664 -2.017655  
C 4.453582 -2.636152 -2.307576  
C 5.547089 -2.610198 -1.439475  
C 5.497869 -1.818889 -0.291798  
C 4.373869 -1.038478 0.024459  
C 4.424735 -0.190684 1.281042  
C 5.330496 1.040603 1.149891  
H 6.366307 0.747566 0.916706  
H 5.344920 1.615508 2.089863  
H 4.980902 1.708183 0.348740  
H 4.785452 -0.819364 2.112750  
H 3.415789 0.138133 1.566912  
H 6.354073 -1.804109 0.388722  
H 6.436371 -3.207871 -1.653888  
H 4.475291 -3.251571 -3.210022  
H 2.481386 -1.909725 -2.708480  
C 2.188012 1.621921 -0.338992  
C 1.799094 2.373060 0.778836  
C 2.079213 3.741249 0.847184  
C 2.756695 4.367240 -0.202246  
C 3.160553 3.621808 -1.317164  
C 2.879157 2.255703 -1.386443  
H 3.209045 1.679386 -2.254974  
H 3.700145 4.107275 -2.134036  
H 2.975753 5.436650 -0.152030  
H 1.762266 4.315659 1.720855

H 1.269101 1.894944 1.603680  
H 0.425488 -1.160151 -2.269619  
H 1.350309 0.234677 -2.870123  
H -1.135390 0.751320 -2.742768  
H -0.172283 1.816755 -1.717223  
C -1.915667 -1.791689 2.152203  
C -2.520183 -3.199041 2.131469  
H -1.767005 -3.960837 2.404825  
C -3.198176 -3.606222 0.808549  
C -2.325968 -4.297111 -0.248487  
C -1.259239 -3.459467 -0.965134  
C -0.057842 -3.034450 -0.129516  
H 0.243349 -3.836412 0.567227  
H 0.818692 -2.828403 -0.769255  
H -0.892412 -4.057371 -1.822406  
H -1.744401 -2.580036 -1.420318  
H -1.836353 -5.177910 0.208466  
H -3.002520 -4.700999 -1.021834  
H -4.016817 -4.305704 1.048696  
H -3.685881 -2.722034 0.360966  
H -3.284332 -3.253787 2.930402  
H -2.699120 -1.070648 1.861225  
H -1.626657 -1.514143 3.186316  
C 1.790219 -1.991737 2.537848  
C 0.855168 -2.781123 3.098089  
H 0.284801 -2.464609 3.975387  
H 0.668845 -3.796775 2.739323  
H 2.027869 -1.009348 2.958719  
H 2.423841 -2.342587 1.717982

<sup>49</sup>C-09

Geometry with 89 atoms:

Total energy: -3202.750957460  
Cr 0.137783 -1.020644 1.166614  
P -1.383961 0.233878 -0.416506  
C -2.557273 -0.927910 -1.205132  
C -2.221585 -1.615390 -2.382865  
C -3.089590 -2.577021 -2.906239  
C -4.295012 -2.863343 -2.258470  
C -4.634380 -2.179632 -1.086405  
C -3.770791 -2.127285 -0.558777  
H -4.048691 -0.685300 0.353874  
H -5.577302 -2.395673 -0.578365  
H -4.971288 -3.617247 -2.668318  
H -2.820437 -3.106691 -3.823269  
H -1.280453 -1.413898 -2.899850  
C -2.392931 1.610410 2.66856  
C -2.201271 1.913107 1.628304  
C -2.913749 2.934627 2.253866  
C -3.843567 3.668199 1.514356  
C -4.036762 3.379951 -0.163243  
C -3.322837 2.363679 -0.494758  
C -3.571440 2.176523 -1.978204  
H -4.660751 2.128398 -2.144410  
C -2.988296 3.312411 -2.830807  
H -3.193507 3.140732 -3.899571  
H -3.426570 4.284927 -2.556838  
H -1.897800 3.396732 -2.703324  
H -3.179836 1.212389 -2.325031  
H -4.766067 3.960301 -0.408966  
H -4.421020 4.465253 1.989292  
H -2.748280 3.148297 3.312285  
H -1.486356 1.337165 2.214620  
C -0.383768 0.996327 -1.806501  
C 1.045789 0.453479 -1.932960  
P 1.876039 0.409722 -0.260100  
C 3.687875 0.142364 -0.511524  
C 4.589510 1.092294 -0.011730  
C 5.968320 0.896905 -0.063087  
C 6.471978 -0.259938 -0.661899  
C 5.588065 -1.209082 -1.173623  
C 4.194827 -1.039758 -1.107114  
C 3.319085 -2.117495 -1.709058  
C 3.286419 -2.082882 -3.243403  
H 4.290338 -2.251804 -3.663570  
H 2.936598 -1.108277 -3.618903  
H 2.618619 -2.864577 -3.640024  
H 2.297555 -2.048320 -1.314352  
H 3.692979 -3.102605 -1.383190  
H 5.982714 -2.117789 -1.637180  
H 7.550153 -0.425953 -0.725249

|   |           |           |           |   |           |           |           |   |           |           |           |
|---|-----------|-----------|-----------|---|-----------|-----------|-----------|---|-----------|-----------|-----------|
| H | 6.645452  | 1.649703  | 0.347497  | C | 5.559687  | -1.378949 | -2.350921 | H | -4.967869 | 2.401415  | -0.920149 |
| H | 4.215019  | 2.001407  | 0.484416  | C | 5.399852  | -1.171508 | -0.981405 | H | -2.444296 | 3.886610  | -1.903803 |
| C | 1.740191  | 2.165908  | 0.276898  | C | 4.218480  | -0.631983 | -0.447411 | H | -2.852544 | 5.031481  | 0.398434  |
| C | 1.379592  | 2.447596  | 1.604000  | C | 4.142454  | -0.420059 | 1.048629  | H | -2.084777 | 5.040627  | 2.749421  |
| C | 1.228001  | 3.767182  | 2.041380  | C | 4.910780  | 0.813216  | 1.540848  | H | -1.164206 | 2.943184  | 3.769202  |
| C | 1.433872  | 4.822624  | 1.150865  | H | 5.976966  | 0.747501  | 1.272101  | H | -0.971191 | 0.908480  | 2.396488  |
| C | 1.801463  | 4.555701  | -0.173690 | H | 4.846189  | 0.901802  | 2.637065  | C | -0.532963 | 0.699416  | -1.868862 |
| C | 1.957360  | 3.238368  | -0.608118 | H | 4.512031  | 1.738751  | 1.099293  | C | 0.745519  | -0.130713 | -2.018136 |
| H | 2.257158  | 3.050087  | -1.641648 | H | 4.536565  | -1.317900 | 1.553068  | P | 1.769759  | -0.028704 | -0.462590 |
| H | 1.970049  | 5.379719  | -0.871239 | H | 3.092228  | -0.337282 | 1.357936  | C | 3.327806  | -0.924777 | -0.874541 |
| H | 1.310567  | 5.854974  | 1.486910  | H | 6.209891  | -1.439324 | -0.297152 | C | 3.354138  | -1.805567 | -1.975502 |
| H | 0.943376  | 3.967601  | 3.076883  | H | 6.489468  | -1.805521 | -2.735016 | C | 4.486320  | -2.566855 | -2.266289 |
| H | 1.216817  | 1.632505  | 2.313808  | H | 4.632616  | -1.198582 | -4.300680 | C | 5.615845  | -2.462580 | -1.452133 |
| H | 1.043024  | -0.573839 | -2.321635 | H | 2.551422  | -0.248128 | -3.425593 | C | 5.597956  | -1.597514 | -0.358592 |
| H | 1.625789  | 1.064705  | -2.641037 | C | 1.872723  | 2.167361  | -0.389271 | C | 4.471591  | -0.819153 | -0.043210 |
| H | -0.928708 | 0.882326  | -2.754806 | C | 0.918440  | 2.886161  | 0.354518  | C | 4.565721  | 0.110957  | 1.151367  |
| H | -0.359821 | 2.070977  | -1.578824 | C | 1.081610  | 4.254303  | 0.585830  | C | 5.469755  | 1.325984  | 0.907042  |
| C | -1.352225 | -1.426376 | 2.505453  | C | 2.207520  | 4.917838  | 0.087808  | H | 6.495285  | 1.014021  | 0.653938  |
| C | -1.338865 | -2.734438 | 3.302238  | C | 3.161313  | 4.211015  | -0.651448 | H | 5.521606  | 1.959562  | 1.806800  |
| H | -0.322558 | -2.967343 | 3.672428  | C | 2.995246  | 2.844245  | -0.894754 | H | 5.091141  | 1.942602  | 0.078699  |
| C | -1.891778 | -3.964094 | 2.572053  | H | 3.747264  | 2.303121  | -1.473228 | H | 4.953252  | -0.462700 | 2.010405  |
| C | -1.053415 | -4.555179 | 1.429591  | H | 4.042263  | 4.725957  | -1.042566 | H | 3.568873  | 0.464363  | 1.447911  |
| C | -0.998136 | -3.755502 | 0.115624  | H | 2.342476  | 5.985473  | 0.277428  | H | 6.482554  | -1.520909 | 0.279961  |
| C | 0.100109  | -2.704307 | 0.000604  | H | 0.330658  | 4.799682  | 1.162818  | H | 6.508034  | -3.055930 | -1.666511 |
| H | 1.087121  | -3.156757 | 0.208884  | H | 0.040508  | 2.379869  | 0.761912  | H | 4.481486  | -3.239967 | -3.126888 |
| H | 0.138255  | -2.300208 | -1.026605 | H | 0.446168  | -0.612052 | -2.587260 | H | 2.485198  | -1.912157 | -2.625011 |
| H | -0.849026 | -4.475529 | -0.712822 | H | 0.855881  | 1.082269  | -2.930207 | C | 2.198789  | 1.759944  | -0.457903 |
| H | -1.985327 | -3.305628 | -0.075714 | H | -1.630446 | 0.784069  | -2.684955 | C | 1.782040  | 2.573039  | 0.605893  |
| H | -0.025842 | -4.756850 | 1.787939  | H | -0.966687 | 1.910755  | -1.498274 | C | 2.052944  | 3.944818  | 0.597307  |
| H | -1.479689 | -5.546023 | 1.199000  | C | -1.216964 | -1.853064 | 2.381295  | C | 2.747479  | 4.511843  | -0.474488 |
| H | -2.038203 | -4.759705 | 3.323362  | C | -0.472510 | -2.684603 | 3.436452  | C | 3.173494  | 3.705527  | -1.537273 |
| H | -2.901114 | -3.728199 | 2.185902  | H | 0.078249  | -2.018697 | 4.129269  | C | 2.901891  | 2.335905  | -1.530350 |
| H | -1.945591 | -2.598038 | 4.218490  | C | 0.520291  | -3.698135 | 2.850549  | H | 3.250944  | 1.709902  | -2.355703 |
| H | -2.347977 | -1.273245 | 2.053798  | C | 1.657778  | -3.044488 | 2.031008  | H | 3.724058  | 4.145901  | -2.372206 |
| H | -1.189487 | -0.568468 | 3.196835  | C | 1.574761  | -3.219027 | 0.498188  | H | 2.961878  | 5.583379  | -0.482211 |
| C | 1.883364  | -1.132238 | 3.194868  | C | 0.331301  | -2.590918 | -0.131503 | H | 1.716948  | 4.568226  | 1.429313  |
| C | 2.194730  | -2.225159 | 2.479276  | H | 0.461065  | -2.404402 | -1.208362 | H | 1.236926  | 2.140843  | 1.447026  |
| H | 1.735592  | -3.196374 | 2.684228  | H | -0.572027 | -3.204226 | 0.001225  | H | 0.498677  | -1.188012 | -2.195377 |
| H | 2.958157  | -2.191240 | 1.695316  | H | 2.482682  | -2.784739 | 0.047997  | H | 1.332319  | 0.225638  | -2.879258 |
| H | 1.168005  | -1.171031 | 4.021935  | H | 1.616897  | -4.302747 | 0.278981  | H | -1.172042 | 0.582679  | -2.755565 |
| H | 2.403125  | -0.183542 | 3.025943  | H | 1.723848  | -1.962411 | 2.304982  | H | -0.291465 | 1.769258  | -1.785673 |

#### <sup>49</sup>C-10

Geometry with 89 atoms:

Total energy: -3202.752220480

|    |           |           |           |   |           |           |           |                               |           |           |           |
|----|-----------|-----------|-----------|---|-----------|-----------|-----------|-------------------------------|-----------|-----------|-----------|
| Cr | 0.079887  | -0.943393 | 1.051176  | H | -1.199299 | -3.224382 | 4.073719  | H                             | -1.889336 | -2.501412 | 1.792922  |
| P  | -1.745563 | -0.052667 | -0.368160 | H | -1.889336 | -2.501412 | 1.792922  | H                             | -1.855225 | -1.097803 | 2.873393  |
| C  | -2.724974 | -1.436414 | -1.053878 | C | -0.023266 | -4.416109 | 2.211883  | C                             | -0.822852 | -3.473729 | -0.824356 |
| C  | -2.386885 | -2.045277 | -2.273177 | H | -1.199299 | -3.224382 | 4.073719  | C                             | 0.269230  | -2.957712 | 0.106983  |
| C  | -3.121269 | -3.139235 | -2.738648 | H | -1.199299 | -3.224382 | 4.073719  | H                             | 0.498842  | -3.694249 | 0.896815  |
| C  | -4.192068 | -3.637486 | -1.990640 | H | -1.889336 | -2.501412 | 1.792922  | H                             | 1.209094  | -2.769563 | -0.439958 |
| C  | -4.528038 | -3.038261 | -0.772241 | H | -1.855225 | -1.097803 | 2.873393  | H                             | -0.346501 | -4.058798 | -1.635222 |
| C  | -3.798226 | -1.944442 | -0.301747 | C | 1.591308  | 0.813296  | 3.181762  | H                             | -1.323980 | -2.637167 | -1.342268 |
| H  | -4.073560 | -1.480337 | 0.648069  | C | 0.322369  | 1.093979  | 3.500175  | H                             | -1.377081 | -5.228840 | 0.296315  |
| H  | -5.365428 | -3.421843 | -0.184432 | H | 0.164931  | 2.001031  | 3.131967  | H                             | -2.501251 | -4.797605 | -0.990131 |
| H  | -4.765481 | -4.492075 | -2.357579 | H | -0.259548 | 0.456976  | 4.172367  | H                             | -3.613432 | -4.495646 | 1.063449  |
| H  | -2.854837 | -3.603108 | -3.691446 | H | 2.177808  | 1.476273  | 2.540209  | H                             | -3.384773 | -2.898294 | 0.369368  |
| H  | -1.553950 | -1.673564 | -2.872264 | H | 2.106622  | -0.057685 | 3.598340  | H                             | -3.018345 | -3.384420 | 2.958711  |
| C  | -2.956717 | 1.126512  | 0.359290  | C | 1.657778  | -3.044488 | 2.031008  | H                             | -2.599574 | -1.155968 | 1.920248  |
| C  | -2.779661 | 1.433729  | 1.721973  | C | 1.574761  | -3.219027 | 0.498188  | H                             | -1.515637 | -1.519439 | 3.256383  |
| C  | -3.620642 | 2.326245  | 2.385245  | C | 0.331301  | -2.590918 | -0.131503 | C                             | 1.110477  | -2.327024 | 3.354539  |
| C  | -4.671397 | 2.919392  | 1.682840  | H | 0.461065  | -2.404402 | -1.208362 | C                             | 2.029977  | -1.622086 | 2.671852  |
| C  | -4.864209 | 2.610869  | 0.336127  | H | -0.572027 | -3.204226 | 0.001225  | H                             | 2.620081  | -2.067362 | 1.865465  |
| C  | -4.026030 | 1.721059  | -0.358437 | H | 2.482682  | -2.784739 | 0.047997  | H                             | 2.288864  | -0.599932 | 2.963773  |
| C  | -4.317692 | 1.488392  | -1.827288 | H | 1.616897  | -4.302747 | 0.278981  | H                             | 0.893883  | -3.373379 | 3.122379  |
| H  | -5.397531 | 1.292239  | -1.935460 | H | 1.723848  | -1.962411 | 2.304982  | H                             | 0.581956  | -1.899491 | 4.211418  |
| C  | -3.941518 | 2.686008  | -2.712244 | H | -1.630446 | 0.784069  | -2.684955 | <sup>49</sup> C-12            |           |           |           |
| H  | -4.175356 | 2.478371  | -3.768595 | H | -0.966687 | 1.910755  | -1.498274 | Geometry with 89 atoms:       |           |           |           |
| H  | -4.496429 | 3.590422  | -2.416891 | H | -1.630446 | 0.784069  | -2.684955 | Total energy: -3202.751927430 |           |           |           |
| H  | -2.868452 | 2.922784  | -2.641648 | H | -0.966687 | 1.910755  | -1.498274 | Cr                            | 0.192721  | -1.019258 | 0.906685  |
| H  | -3.819757 | 0.579940  | -2.189659 | H | -0.966687 | 1.910755  | -1.498274 | P                             | 1.363853  | 0.523206  | -0.708997 |
| H  | -5.697624 | 3.070286  | -0.202662 | H | -1.630446 | 0.784069  | -2.684955 | C                             | 1.137309  | 2.332677  | -0.507513 |
| H  | -5.348189 | 3.615417  | 2.184561  | H | -1.630446 | 0.784069  | -2.684955 | C                             | 1.700013  | 3.232490  | -1.428840 |
| H  | -3.461569 | 2.544732  | 3.443836  | H | -0.966687 | 1.910755  | -1.498274 | C                             | 1.449091  | 4.600944  | -1.311586 |
| H  | -1.978215 | 0.951597  | 2.277717  | H | -1.630446 | 0.784069  | -2.684955 | C                             | 0.631990  | 5.081682  | -0.280780 |
| C  | -0.973979 | 0.854329  | -1.805789 | H | -1.630446 | 0.784069  | -2.684955 | C                             | 0.070769  | 4.191261  | 0.638097  |
| C  | 0.445227  | 0.404262  | -2.166355 | H | -1.630446 | 0.784069  | -2.684955 | C                             | 0.326919  | 2.821552  | 0.526630  |
| P  | 1.579672  | 0.374896  | -0.684285 | H | -1.630446 | 0.784069  | -2.684955 | H                             | -0.112188 | 2.133041  | 1.249772  |
| C  | 3.167479  | -0.292871 | -1.336267 | H | -1.630446 | 0.784069  | -2.684955 | H                             | -0.570545 | 4.560018  | 1.442113  |
| C  | 3.340026  | -0.505069 | -2.718542 | H | -1.630446 | 0.784069  | -2.684955 | H                             | 0.434752  | 6.153045  | -0.195134 |
| C  | 4.523499  | -1.042870 | -3.224797 | H | -1.630446 | 0.784069  | -2.684955 | H                             | 1.892201  | 5.296794  | -2.028198 |



C -1.517535 -4.396446 -0.205905  
 C -0.509745 -3.421394 -0.825662  
 C 0.548536 -2.861015 0.120038  
 H 0.784857 -3.575598 0.927155  
 H 1.489449 -2.641620 -0.410793  
 H 0.000923 -3.950590 -1.653720  
 H -1.061305 -2.602480 -1.321891  
 H -0.957435 -5.248517 0.222482  
 H -2.124885 -4.818213 -1.025968  
 H -3.204249 -4.662083 1.069718  
 H -3.078592 -3.030450 0.433907  
 H -2.604161 -3.605944 2.995798  
 H -2.371727 -1.302948 2.127216  
 H -1.132662 -1.700335 3.321966  
 C 1.537968 -0.708433 3.252523  
 C 1.973065 -1.889906 2.781123  
 H 1.573367 -2.834038 3.163298  
 H 2.771758 -1.956240 2.035616  
 H 0.781782 -0.654036 4.041883  
 H 1.978622 0.239603 2.927190

<sup>49</sup>C-15

Geometry with 89 atoms:

Total energy: -3202.749365520  
 Cr 0.079059 -1.068793 1.036576  
 P -1.507468 0.301513 -0.370574  
 C -2.742733 -0.793328 -1.158639  
 C -2.494034 -1.389825 -2.405287  
 C -3.400179 -2.310731 -2.937405  
 C -4.558298 -2.646628 -2.230121  
 C -4.812984 -2.051200 -0.990253  
 C -3.911054 -1.129618 -0.454179  
 H -4.124358 -0.665121 0.511018  
 H -5.720179 -2.304014 -0.436168  
 H -5.264170 -3.369409 -2.646103  
 H -3.197596 -2.769800 -3.908030  
 H -1.592276 -1.147496 -2.970888  
 C -2.433451 1.641687 0.474774  
 C -2.134063 1.830888 1.837541  
 C -2.760536 2.822956 2.589650  
 C -3.713042 3.640073 1.976698  
 C -4.016871 3.460014 0.627089  
 C -3.391088 2.474904 -0.156446  
 C -3.754852 2.405803 -1.626081  
 H -4.853827 2.434115 -1.713264  
 C -3.161325 3.562253 -2.443534  
 H -3.517546 4.536874 -2.074416  
 H -2.061600 3.573179 -2.391186  
 H -3.450780 3.477782 -3.503186  
 H -3.449894 1.446508 -2.063297  
 H -4.766273 4.103053 0.157007  
 H -4.224007 4.417228 2.550496  
 H -2.514719 2.948339 3.646601  
 H -1.405819 1.178362 3.202044  
 C -0.568187 1.128279 -1.760385  
 C 0.775660 0.463673 -2.075749  
 P 1.792471 0.284156 -0.515441  
 C 3.377399 -0.471341 -1.086993  
 C 3.210101 -1.561852 -1.968455  
 C 4.294259 -2.310362 -2.423394  
 C 5.580894 -1.980742 -1.995585  
 C 5.757259 -0.916397 -1.112230  
 C 4.683440 -0.145230 -0.631001  
 C 4.998298 0.943536 0.376847  
 C 4.588217 0.585207 1.808701  
 H 3.504148 0.419680 1.881466  
 H 4.841580 1.399957 2.505145  
 H 5.091141 -0.331925 2.153847  
 H 4.521296 1.889341 0.088830  
 H 6.082103 1.133927 0.354024  
 H 6.766840 -0.667258 -0.774173  
 H 6.445188 -2.551884 -2.343050  
 H 4.129505 -3.145582 -3.108112  
 H 2.212032 -1.847737 -2.303378  
 C 2.010683 2.059994 -0.094386  
 C 1.574150 2.512939 1.159920  
 C 1.628123 3.871939 1.485931  
 C 2.120366 4.790609 0.556444  
 C 2.556212 4.349548 -0.699873  
 C 2.499186 2.994012 -1.026033  
 H 2.849845 2.661592 -2.006603

H 2.942985 5.067220 -1.427504  
 H 2.163211 5.853319 0.806981  
 H 1.279755 4.210744 2.464397  
 H 1.183804 1.803175 1.893924  
 H 0.630908 -0.533391 -2.513296  
 H 1.335965 1.059510 -2.812289  
 H -1.201867 1.173611 -2.657876  
 H -0.408472 2.164438 -1.426685  
 C -1.379594 -1.620723 2.371712  
 C -1.356879 -3.001538 3.037889  
 H -0.345933 -3.253453 3.409989  
 C -1.861953 -4.169958 2.183173  
 C -0.979662 -4.629876 1.014117  
 C -0.959692 -3.734482 -0.236931  
 C 0.091907 -2.631607 -0.288295  
 H 1.108856 -3.045208 -0.142429  
 H 0.075597 -2.158966 -1.284815  
 H -0.787191 -4.385478 -1.116597  
 H -1.964713 -3.310019 -0.394396  
 H 0.054046 -4.799136 1.371521  
 H -1.346368 -5.623455 0.706065  
 H -2.002065 -5.034377 2.855405  
 H -2.868670 -3.926635 1.795313  
 H -1.988088 -2.964302 3.947128  
 H -2.381410 -1.439639 1.944876  
 H -1.231221 -0.835189 3.146003  
 C 1.709764 -1.312716 3.169525  
 C 2.170560 -2.212408 2.284626  
 H 1.843758 -3.255890 2.313961  
 H 2.932091 -1.953211 1.542108  
 H 1.003814 -1.590875 3.955665  
 H 2.082106 -0.283014 3.187820

<sup>49</sup>C-16

Geometry with 89 atoms:

Total energy: -3202.749433250  
 Cr 3.052218 -1.140006 -1.147306  
 P 1.622557 0.356144 0.355255  
 C 3.379894 0.054671 0.753210  
 C 4.361765 0.446100 -0.174369  
 C 5.710706 0.190004 0.078963  
 C 6.094801 -0.458180 1.257466  
 C 5.124120 -0.844759 2.185959  
 C 3.772361 -0.590944 1.938529  
 H 3.033788 -0.903090 2.678775  
 H 5.418145 -1.346581 3.110950  
 H 7.150928 -0.657591 1.454160  
 H 6.465207 0.501747 -0.647136  
 H 4.076061 0.967011 -1.091114  
 C 1.540643 2.063099 -0.328670  
 C 1.008717 2.166403 -1.630271  
 C 0.873314 3.396562 -2.270690  
 C 1.281703 4.554651 -1.605887  
 C 1.824176 4.463985 -0.323789  
 C 1.970214 3.234906 0.342911  
 C 2.557055 3.253264 1.740126  
 C 3.459522 3.886814 1.724315  
 H 1.588122 3.801892 2.797884  
 H 1.282624 4.833514 2.561944  
 H 0.670492 3.197013 2.866607  
 H 2.062592 3.811099 3.791967  
 H 2.905840 2.253801 2.030760  
 H 2.154475 5.375179 0.182685  
 H 1.187346 5.529839 -2.089796  
 H 0.458852 3.448482 -3.279917  
 H 0.707189 1.262319 -2.168141  
 C 0.704056 0.354386 1.966465  
 C -0.712860 0.894292 1.757947  
 P -1.664258 0.046139 0.376515  
 C -2.773851 -1.156276 1.239819  
 C -2.327499 -1.688240 2.468381  
 C -3.035362 -2.687599 3.133852  
 C -4.213936 -3.183723 2.573430  
 C -4.662935 -2.669189 1.358887  
 C -3.968862 -1.661203 0.665173  
 C -4.577043 -1.180399 -0.640655  
 C -5.896860 -0.420037 -0.456649  
 H -6.658138 -1.046668 0.033970  
 H -6.299845 -0.102460 -1.431550  
 H -5.753863 0.479807 0.159238  
 H -4.756045 -2.059513 -1.283194

H -3.875861 -0.542231 -1.189575  
 H -5.584468 -3.062284 0.920563  
 H -4.779086 -3.971214 3.077742  
 H -2.663252 -3.076551 4.084566  
 H -1.405651 -1.327883 2.926627  
 C -2.717157 1.442926 -0.184936  
 C -2.564983 1.948439 -1.484822  
 C -3.310423 3.053710 -1.905678  
 C -4.209925 3.664304 -1.027305  
 C -4.363992 3.168299 0.272414  
 C -3.623699 2.061377 0.692957  
 H -3.758132 1.670253 1.704760  
 H -5.068738 3.642510 0.959799  
 H -4.792903 4.528511 -1.354933  
 H -3.186059 3.439509 -2.920417  
 H -1.857075 1.483578 -2.174912  
 H -1.292550 0.863557 2.692494  
 H -0.665004 1.949988 1.452169  
 H 0.694045 -0.693062 2.306466  
 H 1.237481 0.941853 2.727049  
 C 1.909580 -1.379794 -2.421462  
 C 2.549491 -2.733053 -2.742319  
 H 1.800722 -3.453213 -3.118529  
 C 3.335472 -3.390073 -1.596865  
 C 2.535792 -4.173121 -0.544857  
 C 1.750013 -3.372794 0.502587  
 C 0.417662 -2.773938 0.066703  
 H -0.191765 -3.526739 -0.469092  
 H -0.172369 -2.469349 0.949988  
 H 1.546625 -4.054269 1.352289  
 H 2.412402 -2.593911 0.916271  
 H 1.851116 -4.877283 -1.054819  
 H 3.254591 -4.806495 0.002965  
 H 4.049710 -4.098813 -2.050065  
 H 3.954827 -2.626429 -1.090536  
 H 3.252453 -2.587932 -3.585337  
 H 2.705175 -0.695666 -2.079200  
 H 1.503512 -0.921590 -3.349446  
 C -1.816518 -1.983481 -2.416092  
 C -0.822208 -2.547825 -3.123649  
 H -0.451717 -2.105616 -4.052553  
 H -0.386045 -3.506414 -2.832588  
 H -2.311293 -1.067789 -2.753940  
 H -2.234822 -2.471728 -1.531709

<sup>49</sup>C-17

Geometry with 89 atoms:

Total energy: -3202.751034610  
 Cr 0.096880 -1.014679 0.937006  
 P 1.288864 0.388631 -0.804368  
 C 1.121967 2.215017 -0.738127  
 C 1.658768 3.019640 -1.758245  
 C 1.473509 4.403035 -1.729527  
 C 0.748498 4.994783 -0.687642  
 C 0.212768 4.199808 0.328559  
 C 0.402677 2.815034 0.304803  
 H -0.012589 2.204767 1.106740  
 H -0.356001 4.655724 1.142375  
 H 0.603152 6.077587 -0.669689  
 H 1.897121 5.023274 -2.523188  
 H 2.231644 2.567176 -2.572162  
 C 3.032137 0.030339 -1.262746  
 C 3.278604 -0.866520 -2.318976  
 C 4.579771 -1.229185 -2.669858  
 C 5.653132 -0.690015 -1.962279  
 C 5.417907 0.199538 -0.911428  
 C 4.121072 0.578194 -0.532033  
 C 3.910935 1.551353 0.614418  
 H 2.983398 1.284085 1.141554  
 C 5.042514 1.646670 1.637104  
 H 5.953340 2.095423 2.113333  
 H 4.733490 2.283598 2.480385  
 H 5.307689 0.656688 2.039926  
 H 3.717671 2.552281 0.190772  
 H 6.273004 0.604144 -0.368868  
 H 6.678851 -0.962474 -2.222728  
 H 4.747108 -1.929376 -3.491475  
 H 2.454767 -1.301602 -2.884504  
 C 0.293698 0.001627 -2.336380  
 C -1.155303 0.470101 -2.168969  
 P -1.928162 -0.174668 -0.585413

C -2.993265 1.218862 -0.018433  
C -3.835962 1.808552 -0.980804  
C -4.635560 2.905116 -0.666511  
C -4.595855 3.427334 0.628390  
C -3.771113 2.845606 1.591642  
C -2.961709 1.732857 1.302145  
C -2.130570 1.108579 2.410483  
C -1.666914 2.037790 3.531137  
H -0.970304 1.507846 4.199398  
H -2.504914 2.389677 4.151035  
H -1.146260 2.923866 3.134688  
H -1.235846 0.637756 1.965966  
H -2.700359 0.270400 2.847557  
H -3.762690 3.268171 2.597184  
H -5.210710 4.291238 0.892774  
H -5.281454 3.349330 -1.427317  
H -3.868497 1.400332 -1.994090  
C -3.094798 -1.475200 -1.144272  
C -2.641785 -2.449059 -2.053375  
C -3.469883 -3.513052 -2.419320  
C -4.754207 -3.623449 -1.876012  
C -5.209440 -2.660632 -0.970476  
C -4.386617 -1.591281 -0.604081  
H -4.760703 -0.840360 0.095572  
H -6.214692 -2.736909 -0.548680  
H -5.400095 -4.457331 -2.160973  
H -3.108757 -4.259493 -3.130982  
H -1.639294 -2.381812 -2.483370  
H -1.199045 1.567911 -2.117539  
H -1.764692 0.156785 -3.029856  
H 0.761080 0.491451 -3.204903  
H 0.337663 -1.084872 -2.503113  
C 0.708585 -2.686414 -0.077099  
C 1.210728 -3.890651 0.717142  
H 0.526056 -4.137030 1.549117  
C 2.650248 -3.805898 1.245579  
C 2.930611 -2.928874 2.475717  
C 2.892303 -1.402864 2.282715  
C 1.513184 -0.752742 2.407438  
H 1.085561 -0.995217 3.396598  
H 1.607271 0.355622 2.388114  
H 3.560882 -0.950645 3.040330  
H 3.352206 -1.161862 1.310481  
H 2.250565 -3.216683 3.299973  
H 3.941735 -3.195084 2.827981  
H 2.966386 -4.832670 1.498779  
H 3.313350 -3.484796 0.420600  
H 1.160529 -4.773044 0.049206  
H 1.466523 -2.406009 -0.828164  
H -0.223057 -2.937654 -0.619592  
C -1.100888 -2.255261 2.920553  
C -1.958236 -2.393391 1.893446  
H -2.821931 -1.733817 1.779954  
H -1.887635 -3.223801 1.184932  
H -1.228273 -1.467175 3.668437  
H -0.297957 -2.972704 3.099942

<sup>49</sup>C-18  
Geometry with 89 atoms:  
Total energy: -3202.747892720  
Cr 0.029286 -1.188254 1.134012  
P -1.527037 0.207572 -0.309328  
C -3.126924 -0.498179 -0.850225  
C -3.249884 -1.198970 -2.062201  
C -4.456646 -1.817340 -2.399592  
C -5.550501 -1.746773 -1.531939  
C -5.436363 -1.047668 -0.326415  
C -4.233140 -0.425918 0.014655  
H -4.161812 0.124151 0.955250  
H -6.288748 -0.983169 0.354053  
H -6.491960 -2.233976 -1.796520  
H -4.540034 -2.357935 -3.345410  
H -2.408361 -1.275070 -2.754398  
C -1.944373 1.724392 0.645815  
C -1.526074 1.745401 1.991253  
C -1.709930 2.868252 2.796028  
C -2.319513 4.000577 2.249664  
C -2.757924 3.982080 0.925712  
C -2.600191 2.854719 0.100184  
C -3.176140 2.915142 -1.301201  
H -2.873462 2.041949 -1.890862

C -4.709261 3.000793 -1.316062  
H -5.072079 3.889639 -0.776511  
H -5.081033 3.061382 -2.351091  
H -5.158548 2.112399 -0.846470  
H -2.757162 3.797197 -1.815639  
H -3.245523 4.869283 0.512633  
H -2.461814 4.897256 2.857865  
H -1.377143 2.859682 3.836312  
H -1.046550 0.864322 2.427909  
C -0.626013 0.764549 -1.853674  
C 0.687649 0.004174 -2.059767  
P 1.757715 0.144869 -0.538235  
C 3.340985 -0.673511 -1.001582  
C 3.370402 -1.572191 -2.085558  
C 4.531046 -2.277079 -2.407915  
C 5.683058 -2.087815 -1.644702  
C 5.664442 -1.199182 -0.567782  
C 4.510994 -0.478763 -0.219567  
C 4.547748 0.503446 0.937314  
C 5.454579 0.128866 2.110500  
H 5.219155 -0.875296 2.498973  
H 5.327768 0.850321 2.933023  
H 6.520691 0.140674 1.837574  
H 3.526573 0.654223 1.315499  
H 4.841327 1.492941 0.543700  
H 6.576501 -1.062909 0.015572  
H 6.599908 -2.631727 -1.885026  
H 4.529765 -2.970060 -3.252534  
H 2.480949 -1.741659 -2.692915  
C 2.105830 1.951608 -0.545914  
C 1.541056 -1.796139 0.444980  
C 1.743139 4.151637 0.423008  
C 2.521183 4.726940 -0.585242  
C 3.096138 3.916952 -1.572367  
C 2.889208 2.535845 -1.556303  
H 3.347714 1.910409 -2.326982  
H 3.709972 4.364237 -2.358192  
H 2.685028 5.807261 -0.602075  
H 1.290272 4.776552 1.196543  
H 0.932915 3.229632 1.238076  
H 0.492031 -1.062975 -2.243115  
H 1.228773 0.403878 -2.931852  
H -1.281355 0.644250 -2.727917  
H -0.434555 1.842132 -1.742682  
C -1.575866 -1.909791 2.218069  
C -1.959928 -3.392994 2.171846  
H -1.101519 -4.033080 2.448239  
C -2.557794 -3.885253 0.838427  
C -1.580292 -4.437574 -0.208721  
C -0.597964 -3.459269 -0.863615  
C 0.467219 -2.867937 0.053543  
H 0.761739 -3.589448 0.836049  
H 1.382520 -2.614998 -0.507266  
H -0.091497 -4.000778 -1.686457  
H -1.171003 -2.661078 -1.367170  
H -1.000862 -5.263263 0.245351  
H -2.179047 -4.899430 -1.013292  
H -3.270385 -4.696791 1.063690  
H -3.162003 -3.077848 0.389832  
H -2.713009 -3.571994 2.962899  
H -2.462496 -1.310330 1.945080  
H -1.336488 -1.617589 3.260562  
C 1.335143 -2.174703 3.284224  
C 2.250929 -1.492641 2.574108  
H 2.810110 -1.950333 1.752459  
H 2.532682 -0.472236 2.849409  
H 1.093841 -3.219420 3.069837  
H 0.839015 -1.728662 4.151226

<sup>49</sup>C-19  
Geometry with 89 atoms:  
Total energy: -3202.749645560  
Cr 0.175734 -1.068400 0.883428  
P 1.323348 0.513245 -0.720330  
C 1.076202 2.323648 -0.553084  
C 1.586919 3.204110 -1.522131  
C 1.348529 4.575526 -1.414689  
C 0.597970 5.078094 -0.344427  
C 0.090383 4.066614 0.622579  
C 0.332950 2.833845 0.519281  
H -0.054914 2.158005 1.281481

H -0.495028 4.594476 1.459608  
H 0.412361 6.151977 -0.264715  
H 1.751869 5.256825 -2.167848  
H 2.183174 2.821687 -2.354834  
C 3.089386 0.264988 -1.150796  
C 3.413729 -0.528053 -2.266620  
C 4.742127 -0.817479 -2.582359  
C 5.761385 -0.310304 -1.777527  
C 5.447979 0.481576 -0.670115  
C 4.122679 0.788851 -0.327167  
C 3.818895 1.664747 0.876388  
H 2.891096 1.307452 1.350265  
C 4.909601 1.755671 1.942468  
H 5.808202 2.275002 1.575127  
H 4.540361 2.324935 2.809526  
H 5.213792 0.758619 2.297331  
H 3.578377 2.679588 0.515203  
H 6.262813 0.865685 -0.055509  
H 6.806815 -0.530091 -2.007636  
H 4.973348 -1.437933 -3.451181  
H 2.630217 -0.939901 -2.903176  
C 0.367527 0.179482 -2.291239  
C -1.104405 0.576457 -2.132423  
P -1.893246 -0.123931 -0.579253  
C -3.085695 1.198381 -0.103471  
C -3.923947 1.688542 -1.128007  
C -4.792159 2.752141 -0.904013  
C -4.830007 3.349983 0.360866  
C -4.019074 2.862310 1.381924  
C -3.142611 1.777127 1.184606  
C -2.346839 1.291447 2.380088  
C -3.221824 0.742673 3.514015  
H -2.601662 0.387432 4.352103  
H -3.851439 -0.093638 3.173648  
H -3.894670 1.518809 3.909769  
H -1.743788 2.126732 2.773684  
H -1.630513 0.515142 2.064069  
H -4.061595 3.331746 2.368394  
H -5.495774 4.195529 0.550640  
H -5.431767 3.116880 -1.711066  
H -3.894329 1.225292 -2.117306  
C -2.946217 -1.511090 -1.158728  
C -2.454018 -2.410516 -2.121806  
C -3.202010 -3.532835 -2.487740  
C -4.443709 -3.776143 -1.891752  
C -4.939142 -2.886758 -0.933300  
C -4.197432 -1.759842 -0.567617  
H -4.604695 -1.062685 1.686645  
H -5.913054 -3.065071 -0.470718  
H -5.026226 -4.655188 -2.177608  
H -2.811355 -4.220469 -3.241846  
H -1.483863 -2.243039 -2.595561  
H -1.196456 1.669361 -2.048551  
H -1.683276 0.266643 -3.015719  
H 0.829390 0.747766 -3.113977  
H 0.464218 -0.888648 -2.534410  
C 0.904598 -2.621614 -0.263286  
C 1.645161 -3.829462 -0.309333  
H 1.072107 -4.312586 1.118268  
C 3.082704 -3.587237 0.792514  
C 3.270216 -2.961071 2.181897  
C 2.971582 -1.462479 2.320821  
C 1.498001 -1.079688 2.420724  
H 1.001211 -1.682475 3.207538  
H 1.393259 -0.014598 2.730749  
H 3.494362 -1.098162 3.226295  
H 3.448880 -0.939155 1.477927  
H 2.678143 -3.529132 2.924774  
H 4.325198 -3.115046 2.466862  
H 3.593405 -4.565538 0.804525  
H 3.623098 -2.977949 0.044187  
H 1.690968 -4.591892 -0.493322  
H 1.542905 -2.175107 -1.042865  
H -0.039029 -2.938272 -0.749466  
C -1.842630 -2.102321 2.390737  
C -1.213194 -3.204638 1.957061  
H -1.549832 -3.742795 1.065992  
H -0.376804 -3.636269 2.511355  
H -2.731126 -1.720881 1.882848  
H -1.549187 -1.605286 3.319952

```

49C-20
Geometry with 89 atoms:
Total energy: -3202.748359680
Cr -0.086676 -1.261040 1.092534
P -1.563240 0.243964 -0.308662
C -3.184777 -0.376005 -0.890279
C -3.308560 -1.054017 -2.115198
C -4.534191 -1.607875 -2.493284
C -5.646533 -1.493146 -1.654285
C -5.531595 -0.814121 -0.437362
C -4.309036 -0.257970 -0.054364
H -4.235406 0.275525 0.895507
H -6.398869 -0.714576 0.219662
H -6.603410 -1.929389 -1.950573
H -4.618248 -2.132046 -3.448269
H -2.452573 -1.161702 -2.785074
C -1.941779 1.730017 0.711445
C -1.622383 1.636333 2.081194
C -1.844266 2.696429 2.958116
C -2.407886 3.876718 2.466668
C -2.744992 3.973617 1.117048
C -2.527302 2.918930 0.212485
C -2.919314 3.138877 -1.234743
H -3.963884 3.492505 -1.256727
C -2.033123 4.169108 -1.950384
H -0.971122 3.877002 -1.936815
H -2.342275 4.285704 -3.001125
H -2.102313 5.157297 -1.469191
H -2.921825 2.191110 -1.789015
H -3.200677 4.895509 0.745278
H -2.596209 4.718523 3.137552
H -1.587550 2.597813 4.015264
H -1.196909 0.711607 2.481466
C -0.629117 0.812415 -1.825408
C 0.654724 0.006429 -2.044996
P 1.702109 0.059710 -0.499741
C 3.277732 -0.768394 -0.967108
C 3.304812 -1.625883 -2.084158
C 4.457958 -2.334924 -2.422641
C 5.605674 -2.189922 -1.643149
C 5.588500 -1.344088 -0.532528
C 4.441012 -0.622957 -0.165173
C 4.483664 0.307549 1.034124
C 5.329995 -0.163613 2.218655
H 5.030765 -1.169925 2.554030
H 5.210819 0.527331 3.068101
H 6.404327 -0.195538 1.982308
H 3.460103 0.494906 1.387758
H 4.839704 1.296668 0.694211
H 6.497579 -1.242113 0.062540
H 6.517746 -2.735799 -1.896812
H 4.454997 -2.995366 -3.292927
H 2.418661 -1.757428 -2.705449
C 2.076412 1.859809 -0.428509
C 1.513493 2.639463 0.592504
C 1.720023 4.022121 0.624237
C 2.501469 4.632903 -0.360384
C 3.077207 3.859100 -1.375850
C 2.865653 2.478997 -1.413130
H 3.323192 1.882106 -2.206685
H 3.694813 4.334034 -2.142228
H 2.667703 5.712702 -0.336462
H 1.266843 4.618474 1.419729
H 0.901250 2.172801 1.365868
H 0.422916 -1.045257 -2.270449
H 1.223290 0.417700 -2.893775
H -1.283530 0.755430 -2.706905
H -0.386127 1.872442 -1.673612
C -1.736153 -1.951916 2.131627
C -2.165436 -3.420058 2.029205
H -1.331737 -4.095940 2.294632
C -2.756419 -3.844844 0.669532
C -1.780761 -4.407369 -0.373942
C -0.748692 -3.451591 -0.983959
C 0.317985 -2.921788 -0.030749
H 0.572695 -3.675024 0.735471
H 1.251703 -2.684124 -0.567870
H -0.244360 -3.992667 -1.808471
H -1.280193 -2.621364 -1.481065
H -1.242786 -5.266845 0.068398
H -2.380766 -4.824047 -1.201918

H -3.508202 -4.630812 0.854292
H -3.315261 -2.998196 0.234248
H -2.936187 -3.602435 2.802232
H -2.601255 -1.317709 1.869349
H -1.498614 -1.703321 3.185907
C 1.165096 -2.407247 3.237210
C 2.068886 -1.679761 2.557276
H 2.641357 -2.095194 1.722410
H 2.332561 -0.667619 2.877662
H 0.940813 -3.444984 2.975525
H 0.655785 -2.007076 4.118796

49C-21
Geometry with 89 atoms:
Total energy: -3202.748547250
Cr -0.057212 -1.249012 1.092903
P -1.574514 0.260740 -0.323441
C -3.195684 -0.432199 -0.882884
C -3.328844 -1.123842 -2.099021
C -4.552196 -1.699789 -2.451845
C -5.652349 -1.593040 -1.595845
C -5.527509 -0.901924 -0.386626
C -4.307411 -0.324213 -0.028997
H -4.224637 0.215773 0.916517
H -6.384910 -0.810614 0.284451
H -6.607223 -2.046390 -1.872274
H -4.643812 -2.234072 -3.400175
H -2.481117 -1.228830 -2.779752
C -1.959283 1.699029 0.687679
C -1.624501 1.623399 2.054999
C -1.843868 2.692118 2.922175
C -2.421519 3.862661 2.423908
C -2.775570 3.940934 1.077428
C -2.560394 2.877486 0.182609
C -2.973374 3.076487 -1.261863
H -4.024326 3.411253 -1.274739
C -2.114216 4.114709 -1.998489
H -1.046111 3.845405 -1.988112
H -2.433011 4.209398 -3.048553
H -2.200982 5.108354 -1.531543
H -2.965551 2.123310 -1.806618
H -3.243105 4.854786 0.700559
H -2.607851 4.711068 3.086973
H -1.573858 2.607705 3.977248
H -1.188184 0.707572 2.463564
C -0.653864 0.778672 -1.848735
C 0.652162 0.006918 -2.066499
P 1.702070 0.078714 -0.525844
C 3.282157 -0.744606 -0.989067
C 3.363463 -1.514850 -2.164997
C 4.533183 -2.199262 -2.498022
C 5.642905 -2.115093 -1.656115
C 5.571262 -1.354511 -0.487761
C 4.404253 -0.663919 -0.124291
C 4.386425 0.166762 1.146326
C 5.030093 -0.485367 2.372976
H 4.904795 0.157138 3.258719
H 6.110946 -0.645020 2.241956
H 4.574369 -1.463064 2.596010
H 3.348442 0.434653 1.392247
H 4.878598 1.133884 0.939423
H 6.449845 -1.294711 0.157849
H 6.567020 -2.641515 -1.907343
H 4.573883 -2.792197 -3.414777
H 2.510684 -1.593878 -2.839769
C 2.088365 1.877405 -0.466262
C 1.489801 2.677103 0.519046
C 1.711337 4.057696 0.542135
C 2.542605 4.646822 -0.414498
C 3.152698 3.853406 -1.393921
C 2.926991 2.475350 -1.422959
H 3.411641 1.863246 -2.188250
H 3.808644 4.311252 -2.138575
H 2.720728 5.724867 -0.396573
H 1.231575 4.669432 1.309952
H 0.837287 2.229081 1.270062
H 0.450199 -1.050911 -2.291501
H 1.206714 0.434911 -2.916447
H -1.308439 0.694295 -2.728090
H -0.438968 1.846877 -1.711438
C -1.642463 -2.013320 2.172904

C -2.067357 -3.476992 2.001557
H -1.227055 -4.158203 2.230611
C -2.662837 -3.844976 0.627548
C -1.688843 -4.368084 -0.438016
C -0.635241 -3.399189 -0.988395
C 0.419709 -2.922205 0.006303
H 0.620759 -3.689740 0.773305
H 1.377349 -2.697287 -0.492880
H -0.123655 -3.905121 -1.830355
H -1.148534 -2.539159 -1.455120
H -1.167210 -5.257202 -0.037054
H -2.288554 -4.731418 -1.291020
H -3.416619 -4.635831 0.780606
H -3.220465 -2.981167 0.227839
H -2.830812 -3.699951 2.771194
H -2.524246 -1.367805 2.006857
H -1.334966 -1.839920 3.223954
C 1.408742 -0.976038 3.232033
C 1.640532 -2.245631 2.854302
H 1.008231 -3.068381 3.201773
H 2.497399 -2.511840 2.228221
H 0.588278 -0.724413 3.912041
H 2.080399 -0.162189 2.945703

49C-22
Geometry with 89 atoms:
Total energy: -3202.744389520
Cr -0.251046 -1.459790 1.014644
P -1.453927 0.315221 -0.350602
C -3.154993 -0.008703 -0.953298
C -3.392988 -0.606543 -2.202933
C -4.695437 -0.927499 -2.594517
C -5.772483 -0.657596 -1.745213
C -5.543329 -0.058128 -0.502892
C -4.243807 0.264882 -0.106605
H -4.081378 0.741664 0.862171
H -6.380805 0.162565 0.163244
H -6.790004 -0.910022 -2.052937
H -4.867029 -1.391158 -3.568907
H -2.568915 -0.830260 -2.883509
C -1.602482 1.814049 0.713992
C -1.269756 1.648421 2.073585
C -1.343269 2.704367 2.979751
C -1.766500 3.957004 2.528723
C -2.111236 4.129565 1.188698
C -2.043193 3.079819 0.255337
C -2.434710 3.386044 -1.176747
H -3.437881 3.844955 -1.166516
C -1.459129 4.340867 -1.880120
H -0.435619 3.934833 -1.908022
H -1.779953 4.530131 -2.916688
H -1.405594 5.311765 -1.363296
H -2.545082 2.463555 -1.761443
H -2.454092 5.110183 0.847558
H -1.837683 4.797855 3.223121
H -1.079982 2.547757 4.028260
H -0.950310 0.671223 2.444571
C -0.427962 0.782324 -1.845901
C 0.802681 -0.115023 -2.011759
P 1.805334 -0.117388 -0.430061
C 3.359330 -1.015887 -0.868731
C 3.245005 -2.048791 -1.822867
C 4.324341 -2.869302 -2.151314
C 5.552797 -2.667569 -1.523552
C 5.682401 -1.642819 -0.585596
C 4.614616 -0.798802 -0.232405
C 4.893791 0.289981 0.789434
C 4.206932 0.109541 2.146084
H 3.112346 0.149484 2.056372
H 4.504402 0.914786 2.836074
H 4.474228 -0.853815 2.608371
H 4.619177 1.270813 3.074953
H 5.981737 0.328985 0.950661
H 6.651700 -1.481215 -0.106057
H 6.411027 -3.298993 -1.765871
H 4.200140 -3.658399 -2.896787
H 2.297559 -2.226574 -2.332325
C 2.232106 1.671553 -0.344473
C 1.856394 2.432833 0.770840
C 2.123994 3.805194 0.814575
C 2.771087 4.425049 -0.256892

```

C 3.154452 3.670616 -1.373560  
C 2.885945 2.301784 -1.418981  
H 3.203512 1.717866 -2.286946  
H 3.667825 4.151607 -2.209790  
H 2.981029 5.496983 -0.224427  
H 1.820937 4.387521 1.687806  
H 1.347856 1.961554 1.612771  
H 0.498184 -1.147750 -2.233760  
H 1.423420 0.234114 -2.851410  
H -1.056835 0.749373 -2.746442  
H -0.116156 1.826216 -1.714471  
C -1.967972 -1.823024 2.095324  
C -2.622218 -3.204697 2.034437  
H -1.892549 -3.999749 2.275263  
C -3.324828 -3.541680 0.704027  
C -2.490185 -4.246330 -0.374525  
C -1.383390 -3.445625 -1.073257  
C -0.175653 -3.084084 -0.218060  
H 0.094950 -3.918636 0.451292  
H 0.713530 -2.875008 -0.838263  
H -1.034806 -4.049388 -1.934173  
H -1.825584 -2.540969 -1.522515  
H -2.043448 -5.161005 0.059311  
H -3.187211 -4.597278 -1.155365  
H -4.175572 -4.206833 0.929354  
H -3.771368 -2.623290 0.283453  
H -3.380335 -3.257954 2.839318  
H -2.722478 -1.057693 1.844903  
H -1.635995 -1.595223 3.129475  
C 0.783494 -3.110556 2.996828  
C 1.619137 -2.115640 2.651772  
H 2.401737 -2.256302 1.900758  
H 1.618812 -1.162893 3.192664  
H 0.835741 -4.092655 2.519210  
H 0.052932 -2.999024 3.802213

\*9C-23

Geometry with 89 atoms:

Total energy: -3202.744493680

Cr 0.029091 -1.296903 0.899861  
P -1.395815 0.180385 -0.522973  
C -3.049515 -0.439227 -1.010633  
C -3.282210 -1.076258 -2.240725  
C -4.538432 -1.615613 -2.530360  
C -5.572574 -1.535345 -1.593776  
C -5.348315 -0.904423 -0.366295  
C -4.096886 -0.357427 -0.075379  
H -3.944145 0.147610 0.880578  
H -6.152578 -0.832276 0.369744  
H -6.552527 -1.961659 -1.820944  
H -4.705931 -2.104778 -3.492884  
H -2.490233 -1.166256 -2.986287  
C -1.691331 1.756342 0.381257  
C -1.077159 1.872292 1.643085  
C -1.177829 3.036335 2.400132  
C -1.901746 4.116006 1.889573  
C -2.512470 4.013628 0.640125  
C -2.432099 2.846637 -0.140027  
C -3.144194 2.844654 -1.480841  
H -2.907865 1.940817 -2.055325  
C -4.670177 2.961774 -1.366217  
H -4.970325 3.890662 -0.856761  
H -5.131981 2.963888 -2.366172  
H -5.089769 2.115790 -0.801842  
H -2.761477 3.693831 -2.073937  
H -3.070603 4.868357 0.248494  
H -1.985068 5.043147 2.461883  
H -0.683474 3.103542 3.371205  
H -0.488497 1.042615 2.043814  
C -0.492629 0.680912 -2.086811  
C 1.010209 0.347388 -2.110372  
P 1.878845 0.242777 -0.464179  
C 3.626103 -0.039418 -1.025055  
C 4.302579 1.065122 -1.585079  
C 5.585450 0.937170 -2.109766  
C 6.214828 -0.311459 -2.085782  
C 5.558091 -1.405320 -1.528320  
C 4.264114 -1.301111 -0.982208  
C 3.629881 -2.544781 -0.393303  
C 4.461615 -3.219268 0.704557  
H 4.628430 -2.542083 1.557464

H 5.450141 -3.536266 0.339524  
H 3.953005 -4.122277 1.078079  
H 3.447198 -3.270034 -1.205706  
H 2.641087 -2.294198 0.006687  
H 6.058201 -2.376801 -1.519643  
H 7.218476 -0.431568 -2.501281  
H 6.090175 1.806784 -2.537230  
H 3.819216 2.043918 -1.607602  
C 1.942661 1.955094 0.201367  
C 1.417186 3.074997 -0.461707  
C 1.479071 4.341142 0.128318  
C 2.075523 4.507266 1.380330  
C 2.612747 3.399313 2.044790  
C 2.540488 2.133076 1.462632  
H 2.968346 1.276712 1.989605  
H 3.089233 3.521911 3.020581  
H 2.123760 5.498296 1.837709  
H 1.057284 5.201354 -0.396779  
H 0.955610 2.978150 -1.444422  
H 1.172847 -0.654310 -2.538711  
H 1.547564 1.051563 -2.764546  
H -0.984850 0.203590 -2.945053  
H -0.651750 1.760983 -2.200183  
C 1.503231 -1.712263 2.193595  
C -1.958258 -3.143423 2.491127  
H -1.105904 -3.779181 2.793730  
C -2.720659 -3.854334 1.361769  
C -1.883002 -4.532900 0.267868  
C -1.207806 -3.638927 -0.780002  
C 0.056648 -2.900424 -0.356572  
H 0.745509 -3.584834 0.176887  
H 0.596631 -2.521434 -1.244650  
H -0.944265 -4.284281 -1.641306  
H -1.954136 -2.930622 -1.173780  
H -1.119998 -5.178911 0.743135  
H -2.553677 -5.219969 -0.276206  
H -3.341590 -4.640331 1.824589  
H -3.431240 -3.147659 0.895716  
H -2.621543 -3.114194 3.377200  
H -2.384158 -1.108335 1.920076  
H -1.088715 -1.244452 3.113654  
C 1.995126 -1.331024 2.729491  
C 1.556405 -2.599248 2.795739  
H 0.718497 -2.885201 3.434982  
H 2.060383 -3.405553 2.256763  
H 1.534340 -0.533704 3.323643  
H 2.887505 -1.065860 2.156978

\*9C-24

Geometry with 89 atoms:

Total energy: -3202.745727470

Cr 0.077716 -1.216368 1.017994  
P -1.353482 0.167262 -0.511994  
C -3.001438 -0.477637 -0.990335  
C -3.228052 -1.165249 -2.193515  
C -4.487015 -1.703683 -2.473317  
C -5.530054 -1.571806 -1.552582  
C -5.311905 -0.890551 -0.351135  
C -4.057951 -0.344041 -0.070999  
H -3.910328 0.202922 0.862339  
H -6.123023 -0.777628 0.372095  
H -6.512362 -1.996687 -1.772153  
H -4.650221 -2.231728 -3.415815  
H -2.428753 -1.295088 -2.925103  
H -1.691107 1.789845 0.292468  
C -1.173988 1.959292 1.590764  
C -1.303475 3.163809 2.277413  
C -1.959501 4.229692 1.658033  
C -2.488334 4.068877 0.377709  
C -2.381550 2.859128 -0.330829  
C -3.034532 2.788849 -1.699416  
H -2.760436 1.868023 -2.227581  
C -4.566234 2.875247 -1.643788  
H -4.903114 3.808941 -1.167051  
H -4.991361 2.842945 -2.659391  
H -4.985853 2.033214 -1.073756  
H -2.647216 3.621981 -2.311569  
H -3.004099 4.908666 -0.096060  
H -2.060149 5.188476 2.172490  
H -0.885823 3.271035 3.280534  
H -0.655938 1.132773 2.082534

C -0.425539 0.578629 -2.089617  
C 1.076930 0.240282 -2.078800  
P 1.904834 0.208819 -0.411144  
C 3.674573 -0.093057 -0.871827  
C 4.388589 0.987353 -1.431653  
C 5.719702 0.851387 -1.815975  
C 6.366956 -0.375323 -1.632885  
C 5.670602 -1.446613 -1.079543  
C 4.320541 -1.338211 -0.695658  
C 3.634216 -2.576005 -0.162713  
C 3.341652 -3.614488 -1.253409  
H 4.271428 -3.962707 -1.730154  
H 2.703098 -3.193441 -2.046184  
H 2.824621 -4.492304 -0.835547  
H 2.699173 -2.295500 0.335897  
H 4.275222 -3.035348 0.609269  
H 6.179926 -2.403786 -0.936581  
H 7.415182 -0.493930 -1.918341  
H 6.252707 1.701634 -2.247994  
H 3.898819 1.955065 -1.558409  
C 1.943100 1.949430 0.184491  
C 2.515008 2.185544 1.448813  
C 2.559722 3.474657 1.981219  
C 2.023194 4.548789 1.263065  
C 1.455597 4.325660 0.006667  
C 1.420108 3.036273 -0.533262  
H 0.982676 2.896312 -1.521802  
H 1.035631 5.158912 -0.561454  
H 2.050283 5.557597 1.681625  
H 3.015750 3.641364 2.960265  
H 2.946811 1.359405 2.018699  
H 1.244232 -0.778302 -2.463144  
H 1.627538 0.917851 -2.749899  
H -0.910513 0.060539 -2.928136  
H -0.577342 1.651765 -2.260828  
C -1.462506 -1.575653 3.219720  
C -1.950284 -2.985587 2.665330  
H -1.114568 -3.625124 3.004524  
C -2.712128 -3.726231 1.554191  
C -1.872555 -4.476596 0.510326  
C -1.161025 -3.647152 -0.564914  
C 0.090418 -2.886924 -0.145228  
H 0.766186 -3.544656 0.434762  
H 0.648895 -2.552052 -1.037732  
H -0.869436 -4.342899 -1.376833  
H -1.892148 -2.964318 -1.025892  
H -1.131602 -5.114046 1.029950  
H -2.547984 -5.175254 -0.128131  
H -3.364724 -4.472052 2.039298  
H -3.392216 -3.022328 1.040906  
H -2.624165 -2.909346 3.540443  
H -2.331464 -0.964063 2.023322  
H -1.046684 -1.086765 3.228628  
C 2.004988 -1.209702 2.870034  
C 1.600054 -2.487718 2.957985  
H 0.748659 -2.782957 3.575163  
H 2.144121 -3.291915 2.454267  
H 1.505267 -0.409850 3.428282  
H 2.909148 -0.936817 2.319165

\*10A-01

Geometry with 77 atoms:

Total energy: -3045.618980020

Cr 0.208523 -0.727746 0.946585  
C -0.033485 -2.543784 0.027722  
C -1.355492 -3.304448 0.179355  
C -1.668886 -3.933023 1.548911  
C -2.307750 -2.996765 2.586562  
C -1.439026 -1.822265 3.036524  
C -0.167951 -2.198706 3.805812  
C 0.902517 -1.103269 3.809083  
C 1.600332 -0.960093 2.455574  
H 2.186865 -1.866617 2.209155  
H 2.310137 -0.112224 2.451867  
H 1.648258 -1.327498 4.595165  
H 0.442080 -0.142897 4.114531  
H 0.272923 -3.115944 3.381613  
H -0.470148 -2.452844 4.835703  
H -2.034615 -1.113598 3.636762  
H -1.242288 -1.213597 2.112795  
H -2.579166 -3.580889 3.483472

H -3.255685 -2.606471 2.176380 H -3.520780 -2.355816 2.122197 H 1.849263 -0.441499 4.623290  
H -0.755834 -4.397771 1.959752 H -1.093381 -4.228572 1.867190 H -0.503938 -2.421473 4.480669  
H -2.375089 -4.764301 1.389072 H -2.741638 -4.538519 1.356078 H -0.169797 -1.231307 5.727116  
H -2.203399 -2.668332 -0.128697 H -2.530708 -2.428218 -0.168911 H -0.416765 0.589432 3.875285  
H -1.341432 -4.125269 -0.563170 H -1.805949 -3.947641 -0.644215 H -1.836091 -0.186177 4.536468  
H 0.823547 -3.140844 0.389351 H 0.455829 -3.170338 0.186666 H -1.819779 -1.821733 2.501814  
H 0.145860 -2.322392 -1.041179 H -0.192976 -2.239836 -1.184131 H -2.313534 -0.142055 2.226506  
P 1.846291 0.179336 -0.626681 P 1.791429 0.184304 -0.601514 P -1.713392 0.183611 -0.736753  
C 3.384097 -0.746564 -0.934578 C 2.927017 -0.958470 -1.467085 C -2.962379 1.409619 -0.209177  
C 3.375453 -1.860508 -1.793581 C 3.690564 -0.517423 -2.563822 C -4.324714 1.294359 -0.523893  
C 4.530860 -2.627251 -1.959527 C 4.586088 -1.385596 -3.189996 C -5.226888 2.264422 -0.075689  
C 5.699018 -2.298563 -1.264525 C 4.734298 -2.697483 -2.725087 C -4.778126 3.349049 0.683010  
C 5.709032 -1.200135 -0.399570 C 3.988276 -3.137641 -1.628900 C -3.419285 3.468812 0.997018  
C 4.558145 -0.426817 -0.229691 C 3.087562 -2.272983 -0.999767 C -2.515016 2.501299 0.557921  
H 4.580168 0.428734 0.448745 H 2.513305 -2.623535 -0.142390 H -1.454909 2.600374 0.810683  
H 6.618471 -0.940695 0.147740 H 4.104552 -4.159054 -1.259068 H -3.065054 4.314535 1.591277  
H 6.601665 -2.899937 -1.396354 H 5.436148 -3.375138 -3.217268 H -5.488129 4.101862 1.033809  
H 4.516776 -3.486563 -2.634240 H 5.174362 -1.035031 -4.041426 H -6.287160 2.169615 -0.322415  
H 2.470177 -2.142591 -2.335685 H 3.602789 0.508877 -2.927786 H -4.685922 0.449497 -1.113668  
C 2.283690 1.888949 -0.164330 C 2.858077 1.370749 0.302468 C -2.606967 -1.239847 -0.474074  
C 3.218585 2.649572 -0.886998 C 4.199770 1.074770 0.593239 C -2.548189 -1.581392 -2.807040  
C 3.445387 3.982904 -0.540023 C 4.960786 1.960809 1.361712 C -3.219066 -2.716603 -3.273807  
C 2.738248 4.566189 0.519050 C 4.392714 3.141163 1.849222 C -3.953184 -3.512622 -2.391204  
C 1.805791 3.815072 1.240566 C 3.053920 3.436211 1.569812 C -4.014288 -3.176620 -1.033676  
C 1.585408 2.477887 0.901807 C 2.287411 2.554890 0.805416 C -3.338872 -2.051580 -0.559744  
H 0.863529 1.880463 1.468728 H 1.241276 2.800277 0.603847 H -3.380036 -1.802817 0.503716  
H 1.252763 4.267253 2.066926 H 2.602223 4.356663 1.947872 H -4.585266 -3.797979 -0.339697  
H 2.918162 5.611182 0.782997 H 4.992321 3.831256 2.447653 H -4.477261 -4.397778 -2.759688  
H 4.176496 4.571994 -1.098942 H 6.005859 1.725740 1.577489 H -3.168039 -2.975562 -4.334117  
H 3.773774 2.199295 -1.713998 H 4.657055 0.156968 0.218192 H -1.983165 -0.973997 -3.516479  
C 0.981910 0.376852 -2.262673 C 0.943488 1.197341 -1.926328 C -0.783905 1.022248 -2.113026  
C -0.322123 1.170762 -2.092894 C -0.458654 0.667517 -2.251269 C 0.597799 0.400421 -2.346958  
P -1.419817 0.518309 -0.718240 P -1.499803 0.604952 -0.711347 P 1.578130 0.418573 -0.762271  
C -2.718380 -0.461240 -1.559613 C -3.139767 -0.024832 -1.222374 C 1.925771 -2.201112 -0.494926  
C -2.403929 -1.265084 -2.668774 C -4.194662 0.075640 -0.295934 C 1.514565 2.803087 0.706705  
C -3.369099 -2.111100 -3.221350 C -5.442329 -0.477512 -0.585396 C 1.727711 4.167679 0.929238  
C -4.653084 -2.168323 -2.671119 C -5.650787 -1.142064 -1.799917 C 2.356730 4.941150 -0.049266  
C -4.971956 -1.370305 -1.567570 C -4.608948 -1.242025 -2.724935 C 2.777297 4.349219 -1.246848  
C -4.011627 -0.521912 -1.011397 C -3.356426 -0.687087 -2.441016 C 2.565461 2.987640 -1.469788  
H -4.274368 0.098843 -0.151084 H -2.557660 -0.781840 -3.178451 H 2.907264 2.534012 -2.403781  
H -5.976069 -1.405232 -1.137808 H -4.768206 -1.754858 -3.676673 H 3.275299 4.952984 -2.009367  
H -5.405440 -2.832335 -3.103309 H -6.626606 -1.579299 -2.024470 H 2.525105 6.007236 0.121626  
H -3.114622 -2.729744 -4.085417 H -6.255292 -0.391811 0.139763 H 1.404933 4.623523 1.868352  
H -1.403421 -1.247967 -3.106532 H -4.041336 0.591154 0.656728 H 1.031369 2.208983 1.488437  
C -2.273990 2.002686 -0.071732 C -1.782843 2.367050 -0.282944 C 3.193474 -0.342870 -1.153454  
C -2.853407 2.952237 -0.932248 C -1.496611 2.808626 1.019415 C 4.331157 0.061183 -0.430758  
C -3.478658 4.084485 -0.407742 C -1.696738 4.146915 1.375183 C 5.556856 -0.576527 -0.632281  
C -3.536843 4.277946 0.977915 C -2.184122 5.052260 0.429518 C 5.662065 -1.624615 -1.552846  
C -2.970033 3.335941 1.840306 C -2.478431 4.619132 -0.869683 C 4.535152 -2.032514 -2.272096  
C -2.339425 2.202526 1.316871 C -2.283076 3.283674 -1.225035 C 3.304726 -1.399642 -2.073559  
H -1.904879 1.468791 2.002138 H -2.530133 2.951762 -2.237026 H 2.437120 -1.741586 -2.641074  
H -3.017922 3.482116 2.922054 H -2.867756 5.325997 -1.606440 H 4.611177 -2.848840 -2.994529  
H -4.028594 5.164936 1.384730 H -2.341531 6.098055 0.704553 H 6.622500 -2.121027 -1.710922  
H -3.925929 4.818863 -1.082016 H -1.474019 4.479038 2.392061 H 6.435137 -0.249732 -0.070085  
H -2.820854 2.804618 -2.014590 H -1.117412 2.106869 1.768071 H 4.264646 0.884168 0.825593  
H -0.095105 2.213602 -1.823101 H -0.940340 1.292363 -3.019249 H 0.504014 -0.648240 -2.668548  
H -0.887561 1.195127 -3.036600 H -0.401860 -0.358739 -2.648619 H 1.145414 0.941305 -3.134489  
H 1.657732 0.882301 -2.970797 H 0.889341 2.233767 -1.559757 H -1.392446 1.029988 -3.030164  
H 0.791395 -0.633453 -2.657103 H 1.570119 1.216398 -2.829643 H -0.688957 2.073343 -1.797225

<sup>41</sup>0A-02

Geometry with 77 atoms:

Total energy: -3045.619216020  
Cr 0.053807 -0.758215 0.899076  
C -0.350291 -2.480144 -0.116695  
C -1.719377 -3.128579 0.095745  
C -2.000558 -3.732150 1.484347  
C -2.587075 -2.777147 2.535330  
C -1.739224 -1.611894 3.062008  
C -0.531190 -1.940686 3.955735  
C 0.761079 -2.404182 3.269088  
C 1.371746 -1.349872 2.339210  
H 2.349828 -1.677897 1.950166  
H 1.554062 -0.398134 2.888118  
H 0.586315 -3.340876 2.714519  
H 1.484550 -2.669748 4.063817  
H -0.860684 -2.700836 4.684858  
H -0.289979 -1.040780 4.549255  
H -2.413826 -0.951655 3.632455  
H -1.472151 -0.933219 2.205144  
H -2.891592 -3.369345 3.416314

<sup>41</sup>0A-03

Geometry with 77 atoms:

Total energy: -3045.620139010  
Cr -0.081752 -0.558651 0.968123  
C -1.451646 -0.779184 2.498241  
C -0.951888 -0.383571 3.901845  
C -0.080800 -1.415020 4.643538  
C 1.420292 -1.411358 4.314738  
C 1.795334 -1.669562 2.856437  
C 1.420747 -3.046375 2.297316  
C 1.410406 -3.104116 0.764283  
C 0.189700 -2.415295 0.152949  
H -0.746325 -2.941739 0.408641  
H 0.253431 -2.364133 -0.947701  
H 1.427615 -4.162587 0.442378  
H 2.342632 -2.659473 0.373046  
H 0.431942 -3.357940 2.672187  
H 2.144065 -3.773287 2.703038  
H 2.876115 -1.504589 2.708142  
H 1.380782 -0.817412 2.251785  
H 1.923544 -2.174945 4.933660

<sup>41</sup>0A-04

Geometry with 77 atoms:

Total energy: -3045.619715490  
Cr 0.037184 -0.408486 1.084566  
C -0.350992 -2.362488 0.581388  
C -1.762941 -2.927411 0.761209  
C -2.218430 -3.257067 2.193423  
C -2.736256 -2.078057 3.030320  
C -1.731069 -0.957934 3.295398  
C -0.500803 -1.337214 4.125270  
C 0.647537 -0.329916 4.001599  
C 1.370815 -0.421439 2.646564  
H 1.945902 -1.364212 2.585037  
H 2.096268 0.404046 2.524708  
H 1.365071 -0.492095 4.827894  
H 0.250059 0.691652 4.159737  
H -0.132107 -2.333346 3.829427  
H -0.827530 -1.431014 5.174840  
H -2.235873 -0.097225 3.766174  
H -1.468221 -0.530820 2.290289  
H -3.088121 -2.456119 4.006341



H -3.622917 -1.649621 2.530875  
H -1.400032 -3.774170 2.724211  
H -3.037978 -3.992083 2.131467  
H -2.510373 -2.269698 0.281010  
H -1.807949 -3.869929 0.182122  
H 0.396301 -2.937884 1.156966  
H -0.053874 -2.413358 -0.480891  
P 1.788696 0.051357 -0.632772  
C 2.488876 -1.502091 -1.289762  
C 2.450238 -1.848308 -2.649662  
C 2.974053 -3.073452 -3.075659  
C 3.541928 -3.955653 -2.153034  
C 3.584780 -3.614551 -0.796265  
C 3.054103 -2.399083 -0.364072  
H 3.080452 -2.143421 0.697857  
H 4.026712 -4.301488 -0.070662  
H 3.951053 -4.911096 -2.490089  
H 2.939944 -3.335235 -4.135933  
H 2.019132 -1.172829 -3.390595  
C 3.195792 1.125869 -0.172145  
C 2.905561 2.340608 0.475591  
C 3.937358 3.203172 0.847302  
C 5.267880 2.856122 0.585911  
C 5.560913 1.648132 -0.052541  
C 4.530781 0.782288 -0.433794  
H 4.772303 -0.158246 -0.932765  
H 6.598670 1.374627 -0.258093  
H 6.076558 3.528054 0.883314  
H 3.703371 4.145739 1.348122  
H 1.869767 2.618505 0.690556  
C 0.985420 0.943596 -2.055378  
C -0.431916 0.435170 -2.344326  
P -1.469671 0.531152 -0.802183  
C -3.140298 -0.045860 -1.260749  
C -3.379872 -0.859606 -2.379986  
C -4.663446 -1.360471 -2.621499  
C -5.714795 -1.055740 -1.753467  
C -5.482425 -0.243609 -0.637219  
C -4.203637 0.255818 -0.388921  
H -4.032553 0.887574 0.487350  
H -6.301503 0.001502 0.043222  
H -6.715776 -1.449209 -1.945627  
H -4.840370 -1.990625 -3.496500  
H -2.575638 -1.112045 -3.073703  
C -1.622892 2.331315 -0.497428  
C -1.028683 2.847820 0.666373  
C -1.066465 4.218757 0.938024  
C -1.707225 5.081254 0.043909  
C -2.310585 4.573892 -1.114157  
C -2.270113 3.205020 -1.386943  
H -2.750922 2.814136 -2.287907  
H -2.816209 5.250855 -1.807020  
H -1.742404 6.153520 0.251285  
H -0.601050 4.610368 1.845613  
H -0.533700 2.167130 1.370417  
H -0.900615 1.019748 -3.151731  
H -0.409247 -0.019400 -2.663069  
H 0.965447 2.003372 -1.755975  
H 1.631007 0.886726 -2.945176

410A-05

Geometry with 77 atoms:

Total energy: -3045.619976410  
Cr 0.123616 -0.655099 0.999660  
C 0.021556 -2.478146 0.062053  
C -1.269825 -3.301701 0.110677  
C -1.677998 -3.922356 1.460255  
C -2.517602 -3.024499 2.382208  
C -1.806838 -1.774940 2.900905  
C -0.658685 -2.031653 3.884643  
C 0.384218 -0.911483 3.928049  
C 1.283061 -0.898266 2.679011  
H 1.854361 -1.839982 2.601234  
H 2.013611 -0.068559 2.729300  
H 1.004665 -1.026201 4.837113  
H -0.128523 0.063507 4.055077  
H -0.145286 -2.972851 3.627479  
H -1.103011 -2.188914 4.881644  
H -2.531784 -1.077885 3.354062  
H -1.486453 -1.198028 1.991942  
H -2.853084 -3.611399 3.255449

H -3.433552 -2.724079 1.844431  
H -0.777609 -4.282433 1.987975  
H -2.278096 -4.823909 1.254843  
H -2.115388 -2.718451 -0.292867  
H -1.139179 -4.134257 -0.606925  
H 0.872064 -3.033995 0.496639  
H 0.277126 -2.262994 -0.992336  
P 1.867641 0.192361 -0.530908  
C 3.294589 -0.897451 -0.847326  
C 4.022735 -1.353592 0.267054  
C 5.125026 -2.190683 0.090417  
C 5.504980 -2.589239 -1.196084  
C 4.780884 -2.145493 -2.305741  
C 3.679807 -1.300017 -2.136906  
H 3.135197 -0.961251 -3.019594  
H 5.073822 -2.454855 -3.311955  
H 6.365470 -3.248591 -1.332856  
H 5.686380 -2.537505 0.961258  
H 3.726697 -1.055384 1.274912  
C 2.537782 1.844835 -0.112450  
C 1.702529 2.758498 0.555342  
C 2.151601 4.051206 0.834437  
C 3.442785 4.436976 0.460416  
C 4.282626 3.528402 -0.192276  
C 3.835534 2.236386 -0.481031  
H 4.499655 1.532832 -0.988298  
H 5.293944 3.826604 -0.479317  
H 3.797309 5.446506 0.682106  
H 1.492310 4.755029 1.347996  
H 0.693454 2.468839 0.860091  
C 1.022380 0.449039 -2.169967  
C -0.262061 1.277250 -2.026397  
P -1.423975 0.610900 -0.721356  
C -2.660434 -0.411165 -1.600952  
C -2.339196 -1.103539 -2.779922  
C -3.255398 -1.997575 -3.342871  
C -4.496254 -2.210253 -2.736376  
C -4.824181 -1.519528 -1.564381  
C -3.912494 -0.628010 -0.996483  
H -4.179468 -0.097403 -0.078587  
H -5.795305 -1.676354 -1.088455  
H -5.208741 -2.911923 -3.176483  
H -2.995053 -2.531487 -4.260052  
H -1.373030 -0.960730 -3.268480  
C -2.335821 2.083977 -0.130023  
C -3.160102 2.834278 -0.987371  
C -3.808602 3.975703 -0.513138  
C -3.643613 4.377857 0.818123  
C -2.831492 3.634455 1.678592  
C -2.181469 2.489720 1.206152  
H -1.555496 1.908605 1.889737  
H -2.706792 3.940965 2.719890  
H -4.155104 5.270999 1.185223  
H -4.449041 4.553840 -1.183722  
H -3.303002 2.520531 -2.024523  
H -0.020065 2.303706 -1.710116  
H -0.786428 1.356000 -2.991373  
H 1.720485 0.945818 -2.861887  
H 0.810998 -0.554849 -2.570274

410A-06

Geometry with 77 atoms:

Total energy: -3045.620063400  
Cr 0.086204 -0.414327 1.064210  
C -0.203518 -2.344809 0.461713  
C -1.525476 -3.003413 0.856800  
C -1.792267 -3.214109 2.359566  
C -2.489140 -2.056504 3.092084  
C -1.757111 -0.719257 3.269273  
C -0.590820 -0.660047 4.270622  
C 0.752972 -1.258742 3.833442  
C 1.379873 -0.533262 2.637700  
H 2.370400 -0.950404 2.391393  
H 1.544312 0.542306 2.875907  
H 0.638081 -2.331133 3.606207  
H 1.437830 -1.218880 4.702392  
H -0.933795 -1.146401 5.200017  
H -0.418310 0.399451 4.533370  
H -2.507681 0.025923 2.861866  
H -1.485708 -0.309768 2.256248  
H -2.773111 -2.398069 4.103066

H -3.439521 -1.853425 2.567449  
H -0.856989 -3.497177 2.869433  
H -2.457600 -4.086962 2.464396  
H -2.377362 -2.462720 0.407253  
H -1.543216 -4.000159 0.374814  
H 0.661452 -2.876320 0.897016  
H -0.077280 -2.358126 -0.635488  
P -1.473677 0.536346 -0.776842  
C -1.891223 2.310414 -0.578395  
C -2.598472 3.015335 -1.568594  
C -2.869326 4.374436 -1.403581  
C -2.440254 5.042946 -0.249995  
C -1.743268 4.349517 0.742715  
C -1.471411 2.987026 0.579246  
H -0.936487 2.449525 1.368574  
H -1.414451 4.866782 1.647202  
H -2.655796 6.106830 -0.124402  
H -3.420678 4.915498 -2.176475  
H -2.948299 2.497930 -2.465985  
C -3.041741 -0.291746 -1.221420  
C -4.187643 -0.003427 -0.456757  
C -5.374058 -0.706872 -0.671072  
C -5.431210 -1.709180 -1.646013  
C -4.297196 -2.000793 -2.408349  
C -3.105818 -1.299429 -2.198447  
H -2.232125 -1.554771 -2.800828  
H -4.335801 -2.780644 -3.172860  
H -6.359965 -2.260294 -1.811806  
H -6.258631 -0.470310 -0.074657  
H -4.156369 0.777278 0.308120  
C -0.407111 0.509886 -2.305918  
C 0.975208 1.089724 -1.985860  
P 1.812884 0.168963 -0.602441  
C 3.162878 1.280981 -0.069045  
C 2.810888 2.438823 0.648648  
C 3.796377 3.331923 1.070768  
C 5.142376 3.071054 0.789957  
C 5.497369 1.918968 0.083027  
C 4.513687 1.023652 -0.348651  
H 4.803123 0.127709 -0.901281  
H 6.547613 1.713502 -1.37805  
H 5.914968 3.767024 1.125507  
H 3.514494 4.230571 1.624750  
H 1.761939 2.650935 0.877160  
C 2.584818 -1.319244 -1.328840  
C 3.199969 -2.230360 -0.450014  
C 3.790731 -3.394175 -0.942558  
C 3.757626 -3.671751 -2.313806  
C 3.137327 -2.777825 -3.190229  
C 2.554091 -1.603275 -2.703664  
H 2.083737 -0.917224 -3.410160  
H 3.109001 -2.990467 -4.261604  
H 4.214720 -4.586783 -2.698028  
H 4.271953 -4.090824 -0.252109  
H 3.217038 -2.028117 0.623034  
H 1.628604 1.112805 -2.871371  
H 0.891136 2.131166 -1.636258  
H -0.317033 -0.536020 -2.637308  
H -0.895955 1.075181 -3.114692

410A-07

Geometry with 77 atoms:

Total energy: -3045.620388620  
Cr -0.158243 -0.730733 0.907192  
C -1.517801 -1.117375 2.398639  
C -0.984050 -0.851035 3.820162  
C -0.127539 -1.962742 4.455074  
C 1.362639 -1.984466 4.082492  
C 1.692274 -2.137303 2.598393  
C 1.228348 -3.431425 1.923368  
C 1.190051 -3.328084 0.392843  
C 0.016890 -2.490372 -0.123854  
H -0.949402 -2.994348 0.049801  
H 0.119006 -2.288543 -1.203880  
H 1.127729 -4.344713 -0.038752  
H 2.144033 -2.907822 0.030393  
H 0.230223 -3.720900 2.290303  
H 1.915354 -4.235126 2.236955  
H 2.777723 -2.018408 2.441749  
H 1.316043 -1.218536 2.070121  
H 1.852889 -2.812493 4.624042

|   |           |           |           |
|---|-----------|-----------|-----------|
| H | 1.837092  | -1.058870 | 4.454417  |
| H | -0.590125 | -2.939113 | 4.229539  |
| H | -0.180317 | -1.858735 | 5.551516  |
| H | -0.421276 | 0.106983  | 3.865902  |
| H | -1.849937 | -0.684227 | 4.487685  |
| H | -1.868176 | -2.160310 | 2.298808  |
| H | -2.403571 | -0.483656 | 2.208445  |
| P | -1.772241 | 0.213295  | -0.678379 |
| C | -2.289142 | 1.913132  | -0.238797 |
| C | -2.881705 | 2.766819  | -1.186901 |
| C | -3.228702 | 4.072193  | -0.834315 |
| C | -2.991410 | 4.537247  | 0.464774  |
| C | -2.412243 | 3.692579  | 1.415075  |
| C | -2.063286 | 2.384654  | 1.065608  |
| H | -1.628638 | 1.724451  | 1.820008  |
| H | -2.233708 | 0.409101  | 2.432240  |
| H | -3.263076 | 5.560335  | 0.735903  |
| H | -3.688262 | 4.730107  | -1.575817 |
| H | -3.081583 | 2.414413  | -2.201970 |
| C | -3.284092 | -0.737212 | -1.055228 |
| C | -4.544753 | -0.304047 | -0.610752 |
| C | -5.679001 | -1.082362 | -0.858371 |
| C | -5.566211 | -2.294419 | -1.545114 |
| C | -4.311880 | -2.733812 | -1.982080 |
| C | -3.173382 | -1.964977 | -1.734364 |
| H | -2.199722 | -2.330393 | -2.067548 |
| H | -4.217707 | -3.682629 | -2.515711 |
| H | -6.455713 | -2.898613 | -1.739079 |
| H | -6.656025 | -0.736008 | -0.512837 |
| H | -4.647420 | 0.642489  | -0.076042 |
| C | -0.862747 | 0.406145  | -2.290105 |
| C | 0.446838  | 1.181358  | -2.091342 |
| P | 1.522119  | 0.483215  | -0.729535 |
| C | 2.481875  | 1.926311  | -0.139259 |
| C | 2.146579  | 2.490903  | 1.102891  |
| C | 2.818345  | 3.624510  | 1.569431  |
| C | 3.834104  | 4.198191  | 0.799788  |
| C | 4.178072  | 3.638118  | -0.436356 |
| C | 3.507159  | 2.507643  | -0.906592 |
| H | 3.788670  | 2.070298  | -1.867759 |
| H | 4.974874  | 4.084491  | -1.036280 |
| H | 4.363256  | 5.081882  | 1.164756  |
| H | 2.551154  | 4.056478  | 2.536861  |
| H | 1.356371  | 2.046750  | 1.715254  |
| C | 2.732450  | -0.615848 | -1.552033 |
| C | 3.935072  | -0.919605 | -0.887121 |
| C | 4.827495  | -1.845356 | -1.429846 |
| C | 4.527451  | -2.488411 | -2.636000 |
| C | 3.334637  | -2.193244 | -3.301046 |
| C | 2.440049  | -1.261465 | -2.764536 |
| H | 1.516783  | -1.045391 | -3.306086 |
| H | 3.096700  | -2.688312 | -4.245692 |
| H | 5.225025  | -3.215965 | -3.057613 |
| H | 5.761677  | -2.066479 | -0.907781 |
| H | 4.181366  | -0.424777 | 0.055988  |
| H | 1.020328  | 1.239767  | -3.029585 |
| H | 0.229118  | 2.216530  | -1.784665 |
| H | -0.684274 | -0.610334 | -2.673523 |
| H | -1.511124 | 0.913381  | -3.021114 |

#### \*10A-08

Geometry with 77 atoms:

Total energy: -3045.620508780

|    |           |           |           |
|----|-----------|-----------|-----------|
| Cr | -0.120691 | -0.587582 | 0.970544  |
| C  | -1.336454 | -0.768921 | 2.625354  |
| C  | -0.653665 | -0.526410 | 3.984696  |
| C  | 0.159215  | -1.694446 | 4.573393  |
| C  | 1.606681  | -1.836106 | 4.078850  |
| C  | 1.788681  | -2.047918 | 2.578128  |
| C  | 1.196607  | -3.334906 | 1.997087  |
| C  | 1.039951  | -3.286099 | 0.472380  |
| C  | -0.125743 | -2.403489 | 0.022829  |
| H  | -1.099192 | -2.842797 | 0.303051  |
| H  | -0.117092 | -2.258110 | -1.071482 |
| H  | 0.886334  | -4.311988 | 0.088130  |
| H  | 1.982629  | -2.935135 | 0.017107  |
| H  | 0.215509  | -3.544408 | 2.453797  |
| H  | 1.857943  | -4.167213 | 2.290680  |
| H  | 2.858501  | -1.991747 | 2.315033  |
| H  | 1.403967  | -1.127364 | 2.060368  |
| H  | 2.082860  | -2.684875 | 4.600562  |

|   |           |           |           |
|---|-----------|-----------|-----------|
| H | 2.175037  | -0.938502 | 4.380918  |
| H | -0.395390 | -2.634857 | 4.409057  |
| H | 0.206132  | -1.568793 | 5.667780  |
| H | -0.012315 | 0.379719  | 3.951601  |
| H | -1.439565 | -0.270572 | 4.720073  |
| H | -1.848998 | -1.747293 | 2.616688  |
| H | -2.116947 | 0.001768  | 2.472194  |
| P | -1.804528 | 0.264872  | -0.631759 |
| C | -2.433741 | 1.939713  | -0.239484 |
| C | -3.763767 | 2.318797  | -0.483480 |
| C | -4.187597 | 3.615320  | -0.177995 |
| C | -3.292900 | 4.540813  | 0.368109  |
| C | -1.967641 | 4.168332  | 0.616642  |
| C | -1.540605 | 2.872088  | 0.321030  |
| H | -0.503265 | 2.595434  | 0.528947  |
| H | -1.264894 | 4.885588  | 1.047429  |
| H | -3.629912 | 5.552768  | 0.605490  |
| H | -5.224684 | 3.902644  | -0.367672 |
| H | -4.471188 | 1.602554  | -0.907206 |
| C | -3.254405 | -0.790020 | -0.971494 |
| C | -3.945156 | -1.336846 | 0.125276  |
| C | -5.061682 | -2.148905 | -0.081119 |
| C | -5.495102 | -2.429791 | -1.381138 |
| C | -4.812283 | -1.890734 | -2.474927 |
| C | -3.696989 | -1.071615 | -2.275569 |
| H | -3.187523 | -0.656770 | -3.146749 |
| H | -5.148927 | -2.104983 | -3.492147 |
| H | -6.366035 | -3.069782 | -1.541883 |
| H | -5.591593 | -2.568332 | 0.777362  |
| H | -3.609950 | -1.130012 | 1.142682  |
| C | -0.922930 | 4.454706  | -2.261011 |
| C | 0.430417  | 1.162957  | -2.117480 |
| P | 1.520829  | 0.433622  | -0.784278 |
| C | 2.573237  | 1.838953  | -0.262469 |
| C | 3.496689  | 2.439007  | -1.137088 |
| C | 4.243505  | 3.541460  | -0.718215 |
| C | 4.078482  | 4.054233  | 0.574492  |
| C | 3.167249  | 3.460740  | 1.451868  |
| C | 2.418670  | 2.355268  | 1.034988  |
| H | 1.713239  | 1.894685  | 1.733208  |
| H | 3.041326  | 3.853782  | 2.463542  |
| H | 4.665943  | 4.916793  | 0.898490  |
| H | 4.959643  | 4.003052  | -1.402367 |
| H | 3.637879  | 2.037834  | -2.143942 |
| C | 2.646726  | -0.737848 | -1.625210 |
| C | 2.237417  | -1.460791 | -2.758227 |
| C | 3.071768  | -2.437499 | -3.310184 |
| C | 4.318223  | -2.704714 | -2.737619 |
| C | 4.731576  | -1.989332 | -1.608487 |
| C | 3.901151  | -1.015257 | -1.051162 |
| H | 4.236815  | -0.462987 | -0.169586 |
| H | 5.707128  | -2.189588 | -1.158679 |
| H | 4.968786  | -3.467589 | -3.171734 |
| H | 2.744434  | -2.990537 | -4.193907 |
| H | 1.267267  | -1.273626 | -3.222588 |
| H | 0.969591  | 1.169601  | -3.077612 |
| H | 0.278982  | 2.214570  | -1.828847 |
| H | -0.805104 | -0.565053 | -2.659846 |
| H | -1.568827 | 1.012218  | -2.957022 |

#### \*10A-09

Geometry with 77 atoms:

Total energy: -3045.618964910

|    |           |           |          |
|----|-----------|-----------|----------|
| Cr | 0.100924  | -0.519488 | 1.041896 |
| C  | -0.213465 | -2.407745 | 0.274814 |
| C  | -1.566406 | -2.982823 | 0.712500 |
| C  | -1.583070 | -3.657176 | 2.095315 |
| C  | -0.805030 | -2.914154 | 3.185785 |
| C  | -1.213499 | -1.459675 | 3.433440 |
| C  | -0.283126 | -0.702471 | 4.389401 |
| C  | 1.188533  | -0.707335 | 3.955760 |
| C  | 1.430564  | -0.155833 | 2.549220 |
| H  | 2.497683  | -0.208003 | 2.277956 |
| H  | 1.167552  | 0.934371  | 2.510842 |
| H  | 1.589070  | -1.733610 | 4.013995 |
| H  | 1.774100  | -0.129331 | 4.695667 |
| H  | -0.374412 | -1.149624 | 5.394182 |
| H  | -0.636397 | 0.340243  | 4.486105 |
| H  | -2.254459 | -1.418916 | 3.797400 |
| H  | -1.313796 | -0.880600 | 2.471458 |
| H  | 0.266721  | -2.954976 | 2.937511 |

|   |           |           |           |
|---|-----------|-----------|-----------|
| H | -0.905580 | -3.454851 | 4.142555  |
| H | -1.147656 | -4.667506 | 2.008139  |
| H | -2.631484 | -3.802563 | 2.409068  |
| H | -2.338042 | -2.192856 | 0.680252  |
| H | -1.913497 | -3.721837 | -0.033425 |
| H | 0.643234  | -3.028053 | 0.592729  |
| H | -0.153133 | -2.315620 | -0.823151 |
| P | 1.688676  | 0.180519  | -0.716964 |
| C | 2.517779  | -1.263704 | -1.467546 |
| C | 2.534982  | -1.503566 | -2.850639 |
| C | 3.170031  | -2.642002 | -3.356971 |
| C | 3.795901  | -3.542416 | -2.491045 |
| C | 3.782446  | -3.308274 | -1.111317 |
| C | 3.139393  | -2.180700 | -0.599298 |
| H | 3.116843  | -2.012767 | 0.480542  |
| H | 4.267264  | -4.011798 | -0.430444 |
| H | 4.292562  | -4.429894 | -2.890554 |
| H | 3.176523  | -2.822016 | -4.434672 |
| H | 2.059228  | -0.811541 | -3.547655 |
| C | 2.991252  | 1.380099  | -0.258029 |
| C | 4.357187  | 1.125764  | -0.453633 |
| C | 5.307173  | 2.069918  | -0.050866 |
| C | 4.903414  | 3.267799  | 0.544559  |
| C | 3.541698  | 3.526074  | 1.740106  |
| C | 2.588977  | 2.585731  | 0.346757  |
| H | 1.527929  | 2.797603  | 0.510035  |
| H | 3.221227  | 4.460990  | 1.206099  |
| H | 5.649510  | 4.001578  | 0.858778  |
| H | 6.369215  | 1.865826  | -0.207315 |
| H | 4.685678  | 0.194678  | -0.919487 |
| C | 0.724324  | 1.040789  | -2.055168 |
| C | -0.665830 | 4.030647  | -2.264344 |
| P | -1.622994 | 0.446735  | -0.663932 |
| C | -3.265402 | -0.252362 | -1.063040 |
| C | -4.393684 | 0.194673  | -0.351252 |
| C | -5.639850 | -0.399183 | -0.561855 |
| C | -5.774920 | -1.444986 | -1.880785 |
| C | -4.657268 | -1.895296 | -2.189498 |
| C | -3.406771 | -1.307207 | -1.981441 |
| H | -2.546062 | -1.683842 | -2.537823 |
| H | -4.756576 | -2.710823 | -2.910004 |
| H | -6.751072 | -1.907642 | -1.644974 |
| H | -6.510208 | -0.040178 | -0.007044 |
| H | -4.303418 | 1.015764  | 0.364652  |
| C | -1.915644 | 2.236897  | -0.373910 |
| C | -1.462628 | 2.822701  | 0.819910  |
| C | -1.638429 | 4.190990  | 1.053517  |
| C | -2.272429 | 4.984240  | 0.094431  |
| C | -2.734841 | 4.408346  | -1.095594 |
| C | -2.559661 | 3.043590  | -1.329797 |
| H | -2.933909 | 2.602398  | -2.257340 |
| H | -3.237097 | 5.027179  | -1.843076 |
| H | -2.412490 | 6.052854  | 0.274844  |
| H | -1.283294 | 4.633487  | 1.987339  |
| H | -0.975720 | 2.214710  | 1.587651  |
| H | -1.223849 | 0.983932  | -3.035643 |
| H | -0.588948 | -0.615076 | -2.600609 |
| H | 0.641378  | 2.088481  | -1.725579 |
| H | 1.307762  | 1.060632  | -2.988030 |

#### \*10A-10

Geometry with 77 atoms:

Total energy: -3045.620338630

|    |           |           |           |
|----|-----------|-----------|-----------|
| Cr | -0.077453 | -0.534633 | 1.023561  |
| C  | -1.285697 | -0.633506 | 2.659071  |
| C  | -0.344112 | 0.368820  | 3.315138  |
| C  | 0.660726  | -0.195895 | 4.340693  |
| C  | 1.322041  | -1.522342 | 3.936835  |
| C  | 2.104087  | -1.493084 | 2.614234  |
| C  | 2.190151  | -2.827144 | 1.862042  |
| C  | 0.835508  | -3.352562 | 1.363578  |
| C  | 0.127899  | -2.461378 | 0.332217  |
| H  | -0.870156 | -2.863362 | 0.100238  |
| H  | 0.704302  | -2.432818 | -0.611211 |
| H  | 0.164720  | -3.525027 | 2.222443  |
| H  | 0.997321  | -4.354484 | 0.921570  |
| H  | 2.656783  | -3.574952 | 2.526539  |
| H  | 2.871123  | -2.704417 | 1.002715  |
| H  | 3.114828  | -1.086799 | 2.786314  |
| H  | 1.705485  | -0.718937 | 1.909378  |
| H  | 0.546839  | -2.301311 | 3.889084  |

|   |           |           |           |   |           |           |           |   |           |           |           |
|---|-----------|-----------|-----------|---|-----------|-----------|-----------|---|-----------|-----------|-----------|
| H | 2.006401  | -1.841213 | 4.739696  | H | 1.879124  | -0.700494 | 4.447201  | H | 2.214652  | -0.326930 | 4.411809  |
| H | 0.122649  | -0.353692 | 5.290043  | H | -0.354039 | -2.811076 | 4.312294  | H | -0.519360 | -1.687564 | 4.800993  |
| H | 1.432511  | 0.566881  | 4.544471  | H | -0.089663 | -1.582364 | 5.537954  | H | 0.213855  | -0.434043 | 5.879713  |
| H | 0.268330  | 0.903064  | 2.509359  | H | -0.468377 | 0.186118  | 3.644858  | H | 0.175905  | 1.060672  | 3.620829  |
| H | -0.881559 | 1.226103  | 3.753562  | H | -1.825805 | -0.655343 | 4.345872  | H | -1.268372 | 0.821632  | 4.971384  |
| H | -1.342740 | -1.611748 | 3.156007  | H | -1.621690 | -2.377469 | 2.319869  | H | -1.945348 | -1.106123 | 2.920465  |
| H | -2.296911 | -0.232657 | 2.498227  | H | -2.383135 | -0.794433 | 2.070395  | H | -2.082439 | 0.577942  | 2.371938  |
| P | -1.794377 | 0.096394  | -0.605762 | P | -1.730741 | 0.178396  | -0.733291 | P | 1.546639  | 0.178520  | -0.870250 |
| C | -3.004545 | 1.355096  | -0.058551 | C | -2.728922 | 1.474722  | 0.096137  | C | 2.687919  | -1.006891 | -1.678120 |
| C | -2.513991 | 2.458748  | 0.663253  | C | -2.087997 | 2.640089  | 0.557502  | C | 4.075128  | -0.794232 | -1.732027 |
| C | -3.384863 | 3.456541  | 1.102636  | C | -2.805101 | 3.601886  | 1.271483  | C | 4.905205  | -1.739036 | -2.343516 |
| C | -4.754538 | 3.356829  | 0.832786  | C | -4.163965 | 3.407496  | 1.541787  | C | 4.362360  | -2.897543 | -2.905892 |
| C | -5.247055 | 2.261173  | 0.118287  | C | -4.802285 | 2.247245  | 1.094838  | C | 2.981547  | -3.117079 | -2.849953 |
| C | -4.378254 | 1.260836  | -0.329232 | C | -4.091063 | 1.280885  | 0.376991  | C | 2.148268  | -2.182795 | -2.231833 |
| H | -4.774414 | 0.409153  | -0.885671 | H | -4.602692 | 0.379624  | 0.033425  | H | 1.074550  | -2.376967 | -2.179867 |
| H | -6.315753 | 2.182089  | -0.095413 | H | -5.863529 | 2.090705  | 1.302811  | H | 2.551438  | -4.023537 | -3.282774 |
| H | -5.438238 | 4.134390  | 1.181842  | H | -4.724282 | 4.160853  | 2.100698  | H | 5.014592  | -3.631701 | -3.384917 |
| H | -2.995557 | 4.311277  | 1.661026  | H | -2.298655 | 4.506392  | 1.617322  | H | 5.983102  | -1.563325 | -2.382557 |
| H | -1.445684 | 2.544743  | 0.880910  | H | -1.026236 | 2.811280  | 0.360942  | H | 4.513104  | 0.109383  | -1.303051 |
| C | -2.744682 | -1.328348 | -1.235999 | C | -2.925721 | -0.958451 | -1.517721 | C | 2.580408  | 1.603454  | -0.362502 |
| C | -2.713716 | -1.735266 | -2.578397 | C | -3.606314 | -0.604985 | -2.696359 | C | 3.042734  | 1.640106  | 0.965612  |
| C | -3.422314 | -2.871877 | -2.982691 | C | -4.555359 | -1.470444 | -3.243449 | C | 3.828604  | 2.704411  | 1.415313  |
| C | -4.166087 | -3.604460 | -2.054812 | C | -4.840010 | -2.688533 | -2.615956 | C | 4.155831  | 3.747057  | 0.543325  |
| C | -4.197337 | -3.204645 | -0.713380 | C | -4.177386 | -3.038526 | -1.436325 | C | 3.704340  | 3.717660  | -0.780639 |
| C | -3.483762 | -2.079105 | -0.302034 | C | -3.222640 | -2.178268 | -0.886728 | C | 2.924492  | 2.651095  | -1.235146 |
| H | -3.495034 | -1.785152 | 0.750626  | H | -2.717299 | -2.452725 | 0.040070  | H | 2.590845  | 2.640051  | -2.275099 |
| H | -4.773421 | -3.777479 | 0.017173  | H | -4.402209 | -3.985039 | -0.939155 | H | 3.963838  | 4.528712  | -1.465335 |
| H | -4.719604 | -4.490727 | -2.374324 | H | -5.583613 | -3.363619 | -3.046524 | H | 4.764587  | 4.583522  | 0.895115  |
| H | -3.392267 | -3.182418 | -4.029800 | H | -5.079758 | -1.189855 | -4.160073 | H | 4.181872  | 2.720268  | 2.449093  |
| H | -2.140997 | -1.178505 | -3.322430 | H | -3.412352 | 0.351584  | -3.186721 | H | 2.795689  | 0.827898  | 1.654740  |
| C | -0.924948 | 0.886504  | -2.051325 | C | -0.812679 | 1.065278  | -2.099932 | C | 0.465171  | 0.831009  | -2.254790 |
| C | 0.450889  | 0.257374  | -2.309673 | C | 0.568930  | 0.455693  | -2.361668 | C | -0.892309 | 0.119013  | -2.323393 |
| P | 1.498358  | 0.426829  | -0.777465 | P | 1.576152  | 0.417903  | -0.797231 | P | -1.787146 | 0.175811  | -0.691590 |
| C | 1.945238  | 2.203978  | -0.766653 | C | 1.962434  | 2.176529  | -0.454067 | C | -3.298582 | -0.822715 | -0.897657 |
| C | 2.709316  | 2.769447  | -1.803571 | C | 1.714269  | 2.685822  | 0.831741  | C | -4.021736 | -1.171894 | 0.257884  |
| C | 2.999359  | 4.134532  | -1.796937 | C | 1.987320  | 4.025149  | 1.129971  | C | -5.188534 | -1.930689 | 0.152751  |
| C | 2.531983  | 4.948460  | -0.757301 | C | 2.510481  | 4.864410  | 0.143122  | C | -5.639894 | -2.355448 | -1.101640 |
| C | 1.778370  | 4.393814  | 0.280034  | C | 2.768738  | 4.363259  | -1.138993 | C | -4.923397 | -2.015461 | -2.252250 |
| C | 1.488313  | 3.025303  | 0.276341  | C | 2.500404  | 3.026366  | -1.437164 | C | -3.757394 | -1.250124 | -2.155335 |
| H | 0.908582  | 2.596172  | 1.097992  | H | 2.719953  | 2.641019  | -2.436239 | H | -3.220586 | -0.990592 | -3.069296 |
| H | 1.418567  | 5.024373  | 1.096578  | H | 3.186102  | 5.017929  | -1.907932 | H | -5.273069 | -2.344116 | -3.233946 |
| H | 2.761400  | 6.016841  | -0.755534 | H | 2.723916  | 5.911265  | 0.372613  | H | -6.550832 | -2.953510 | -1.181834 |
| H | 3.594748  | 4.566860  | -2.604791 | H | 1.793210  | 4.410036  | 2.133970  | H | -5.744445 | -2.196007 | 1.055150  |
| H | 3.086609  | 2.139273  | -2.613136 | H | 1.310060  | 2.035164  | 1.612899  | H | -3.673257 | -0.851848 | 1.241707  |
| C | 3.060008  | -0.473920 | -1.078433 | C | 3.174071  | -0.352162 | -1.248469 | C | -2.311294 | 1.921411  | -0.509349 |
| C | 4.182891  | -0.129438 | -0.302324 | C | 3.266976  | -1.334662 | -2.249337 | C | -3.585000 | 2.368188  | -0.896211 |
| C | 5.362446  | -0.868790 | -0.401561 | C | 4.481866  | -1.984394 | -2.486605 | C | -3.928219 | 3.714395  | -0.742518 |
| C | 5.435896  | -1.962322 | -1.271864 | C | 5.611707  | -1.666776 | -1.727971 | C | -3.007958 | 4.620956  | -2.063234 |
| C | 4.325644  | -2.308858 | -2.046161 | C | 5.525783  | -0.690033 | -0.729966 | C | -1.738405 | 4.181543  | 0.183640  |
| C | 3.140954  | -1.571597 | -1.951475 | C | 4.315678  | -0.036416 | -0.489054 | C | -1.393210 | 2.836270  | 0.039151  |
| H | 2.287023  | -1.865403 | -2.564194 | H | 4.263796  | 0.728151  | 0.290642  | H | -0.402221 | 2.501392  | 0.360950  |
| H | 4.378276  | -3.158220 | -2.731577 | H | 6.406993  | -0.432280 | -0.137279 | H | -1.018485 | 4.884509  | 0.609436  |
| H | 6.359545  | -2.540967 | -1.347843 | H | 6.559330  | -2.177340 | -1.915647 | H | -3.282909 | 5.671562  | -0.085399 |
| H | 6.229139  | -0.588953 | 0.202301  | H | 4.542554  | -2.743621 | -3.270233 | H | -4.922334 | 4.055886  | -1.041210 |
| H | 4.139345  | 0.724075  | 0.379997  | H | 2.398133  | -1.608214 | -2.850433 | H | -4.311495 | 1.665510  | -1.310915 |
| H | 0.349814  | -0.814511 | -2.538759 | H | 0.465304  | -0.584040 | -2.708159 | H | -1.522474 | 0.582861  | -3.098262 |
| H | 0.952507  | 0.738269  | -3.164007 | H | 1.100837  | 1.012592  | -3.148788 | H | -0.773181 | -0.945449 | -2.583238 |
| H | -1.567914 | 0.855686  | -2.944220 | H | -1.419556 | 1.057964  | -3.016975 | H | 0.316572  | 1.904642  | -2.060915 |
| H | -0.822351 | 1.949828  | -1.780867 | H | -0.720276 | 2.117759  | -1.792204 | H | 0.994377  | 0.740764  | -3.215311 |

\*10A-11

Geometry with 77 atoms:  
Total energy: -3045.619030440  
Cr -0.078411 -0.781439 0.847772  
C -1.427632 -1.290278 2.318733  
C -0.940745 -0.819247 3.703965  
C 0.003747 -1.776966 4.456681  
C 1.500230 -1.684595 4.118107  
C 1.884589 -1.882858 2.652635  
C 1.555121 -3.243891 2.027934  
C 1.563505 -3.217776 0.492397  
C 0.319763 -2.548248 -0.101158  
H -0.578754 -3.162893 0.074272  
H 0.412919 -2.398319 -1.191038  
H 1.630967 -4.254616 0.112683  
H 2.479726 -2.712436 0.141058  
H 0.572477 -3.601361 2.376630  
H 2.296138 -3.969155 2.403300  
H 2.961070 -1.681775 2.518036  
H 1.456603 -1.020628 2.071971  
H 2.046639 -2.433228 4.718306

\*10A-12

Geometry with 77 atoms:  
Total energy: -3045.618738480  
Cr -0.180594 -0.506957 1.027018  
C -1.359824 -0.202739 2.676082  
C -0.567101 0.285144 3.905489  
C 0.132676 -0.798130 4.750556  
C 1.547689 -1.201300 4.307959  
C 1.674761 -1.747570 2.887775  
C 0.960319 -3.072649 2.604562  
C 0.723741 -3.324915 1.109837  
C -0.414504 -2.475444 0.539064  
H -1.387100 -2.755302 0.980226  
H -0.499974 -2.590257 -0.555618  
H 0.491537 -4.395478 0.954392  
H 1.659601 -3.140188 0.550828  
H -0.007882 -3.104901 3.131066  
H 1.572938 -3.880005 3.039081  
H 2.737955 -1.843690 2.609535  
H 1.353951 -0.930249 2.188912  
H 1.939673 -1.963794 5.003712

\*10A-13

Geometry with 77 atoms:  
Total energy: -3045.618066950  
Cr -0.112647 -0.189083 1.207681  
C -0.091281 1.763130 1.810406  
C 1.263059 2.383180 2.165708  
C 1.845611 2.045386 3.549821  
C 2.593779 0.708627 3.664171  
C 1.775998 -0.546843 3.365005  
C 0.598441 -0.831516 4.302428  
C -0.430991 -1.791870 3.697740  
C -1.288623 -1.127137 2.660699  
H -1.950141 -0.365933 3.057616  
H -1.941056 -1.867148 2.107491  
H -1.081780 -2.182729 4.502379  
H 0.094601 -2.678833 3.293690  
H 0.090070 0.108039 4.574724  
H 1.011231 -1.239613 5.240439  
H 2.436891 -1.429709 3.334257  
H 1.469233 -0.484469 2.287499  
H 3.002476 0.611396 4.685189

|   |           |           |           |   |           |           |           |   |           |           |           |
|---|-----------|-----------|-----------|---|-----------|-----------|-----------|---|-----------|-----------|-----------|
| H | 3.468920  | 0.732789  | 2.990086  | H | -3.324724 | -2.593315 | 2.134139  | H | 2.325674  | -1.477523 | 4.440268  |
| H | 1.042565  | 2.099775  | 4.305142  | H | -0.557342 | -3.898316 | 2.448452  | H | 0.135403  | -1.118442 | 5.450719  |
| H | 2.560697  | 2.838315  | 3.824280  | H | -2.028172 | -4.645676 | 1.856400  | H | 0.378634  | -0.073588 | 4.062004  |
| H | 2.014181  | 2.156227  | 1.386225  | H | -2.040533 | -2.742028 | 0.020487  | H | -1.935998 | -1.358212 | 4.496583  |
| H | 1.143642  | 3.482649  | 2.119187  | H | -1.056138 | -4.176958 | -0.146536 | H | -1.152476 | -2.689994 | 3.674727  |
| H | -0.801341 | 1.822457  | 2.653267  | H | 0.983578  | -2.919695 | 0.692704  | H | -2.471492 | -1.400347 | 2.032684  |
| H | -0.558404 | 2.285634  | 0.955933  | H | 0.303254  | -2.321982 | -0.841897 | H | -1.757834 | 0.130221  | 2.581534  |
| P | 1.471638  | -0.074894 | -0.917389 | P | 1.872858  | 0.234288  | -0.529071 | P | -1.785178 | 0.264695  | -0.671187 |
| C | 2.797717  | -1.334718 | -0.917055 | C | 3.284181  | -0.869086 | -0.886439 | C | -2.244183 | 1.989478  | -0.262992 |
| C | 2.958658  | -2.300920 | -1.924201 | C | 3.975802  | -0.802649 | -2.110818 | C | -1.370786 | 2.744150  | 0.540560  |
| C | 3.993245  | -3.238468 | -1.838800 | C | 5.050148  | -1.660114 | -2.357579 | C | -1.649059 | 4.083600  | 0.822994  |
| C | 4.878181  | -3.215464 | -0.757198 | C | 5.446386  | -2.588106 | -1.388869 | C | -2.808748 | 4.676358  | 0.314709  |
| C | 4.728278  | -2.251965 | 0.246732  | C | 4.764868  | -2.658188 | -0.170686 | C | -3.685266 | 3.929969  | -0.480806 |
| C | 3.690870  | -1.321301 | 0.171566  | C | 3.687146  | -1.805422 | 0.080929  | C | -3.406226 | 2.592927  | -0.773603 |
| H | 3.580750  | -0.572161 | 0.961170  | H | 3.153897  | -1.875268 | 1.029429  | H | -4.097711 | 2.018448  | -1.394330 |
| H | 5.419894  | -2.227561 | 1.092386  | H | 5.068595  | -3.383340 | 0.587872  | H | -4.592488 | 4.392205  | -0.877392 |
| H | 5.686891  | -3.947825 | -0.696567 | H | 6.286547  | -3.258411 | -1.586039 | H | -3.031946 | 5.722059  | -0.539921 |
| H | 4.110273  | -3.986474 | -2.626834 | H | 5.580839  | -1.601316 | -3.310902 | H | -0.960052 | 4.661185  | 1.443740  |
| H | 2.288827  | -2.328567 | -2.785908 | H | 3.688867  | -0.080959 | -2.878161 | H | -0.458859 | 2.294289  | 0.941966  |
| C | 2.251782  | 1.468245  | -1.537587 | C | 2.546956  | 1.879648  | -0.084323 | C | -3.331012 | -0.824892 | -0.237250 |
| C | 3.478351  | 1.460505  | -2.223460 | C | 3.913310  | 2.188626  | -0.180418 | C | -4.340383 | -0.587224 | 0.007464  |
| C | 4.015483  | 2.645435  | -2.712081 | C | 4.370565  | 3.460577  | 0.177426  | C | -5.508174 | -1.336488 | -0.140023 |
| C | 3.336318  | 3.862916  | -2.525684 | C | 3.474376  | 4.431844  | 0.632853  | C | -5.678951 | -2.159169 | -1.259117 |
| C | 2.116607  | 3.877784  | -1.842235 | C | 2.112695  | 4.129085  | 0.737163  | C | -4.678749 | -2.227636 | -2.232424 |
| C | 1.579814  | 2.688567  | -1.343009 | C | 1.651310  | 2.858655  | 0.387616  | C | -3.506567 | -1.478097 | -2.092958 |
| H | 0.640526  | 2.717155  | -0.788001 | H | 0.584507  | 2.640051  | 0.483919  | H | -2.740426 | -1.547670 | -2.866982 |
| H | 1.585488  | 4.819732  | -1.684946 | H | 1.406553  | 4.880932  | 1.097793  | H | -4.808933 | -2.866801 | -3.108905 |
| H | 3.761167  | 4.794183  | -2.908054 | H | 3.837380  | 5.423974  | 0.911857  | H | -6.593450 | -2.746355 | -1.371941 |
| H | 4.970885  | 2.639436  | -3.242337 | H | 5.435916  | 3.691121  | 0.100626  | H | -6.287577 | -1.279152 | 0.623598  |
| H | 4.018718  | 0.523719  | -2.376767 | H | 4.625766  | 1.439749  | -0.531581 | H | -4.216669 | 0.053339  | 0.883693  |
| C | 0.308524  | -0.549578 | -2.298615 | C | 1.040430  | 0.475581  | -2.183809 | C | -0.884663 | 0.400795  | -2.293963 |
| C | -0.998747 | 0.248545  | -2.200786 | C | -0.292119 | 1.228889  | -2.086310 | C | 0.463873  | 1.116374  | -2.120545 |
| P | -1.857577 | -0.077007 | -0.577544 | P | -1.445665 | 0.526296  | -0.793566 | P | 1.517049  | 0.400404  | -0.745513 |
| C | -2.746659 | -1.654643 | -0.859588 | C | -2.598363 | -0.589419 | -1.672447 | C | 2.490840  | 1.826954  | -0.141081 |
| C | -4.069595 | -1.681943 | -1.330418 | C | -3.842176 | -0.879371 | -1.080823 | C | 2.443711  | 2.157216  | 1.223135  |
| C | -4.699490 | -2.905084 | -1.575360 | C | -4.696191 | -1.818573 | -1.660692 | C | 3.149062  | 3.262942  | 1.709311  |
| C | -4.017562 | -4.106230 | -1.355931 | C | -4.316739 | -2.487064 | -2.830164 | C | 3.905926  | 4.044773  | 0.832886  |
| C | -2.701580 | -4.085993 | -0.883354 | C | -3.082264 | -2.205816 | -3.421048 | C | 3.962670  | 3.718839  | -0.528008 |
| C | -2.070130 | -2.866183 | -0.629592 | C | -2.224487 | -1.261812 | -2.847238 | C | 3.261851  | 2.614356  | -1.014842 |
| H | -1.048014 | -2.867243 | -0.239253 | H | -1.264618 | -1.059835 | -3.327380 | H | 3.318250  | 2.361650  | -2.076832 |
| H | -2.168164 | -5.021975 | -0.700971 | H | -2.782245 | -2.722190 | -4.336122 | H | 4.558863  | 4.328035  | -1.211722 |
| H | -4.515196 | -5.060210 | -1.546407 | H | -4.984926 | -3.224692 | -3.280832 | H | 4.457326  | 4.909718  | 1.209656  |
| H | -5.730359 | -2.918636 | -1.937299 | H | -5.662487 | -2.030156 | -1.196373 | H | 3.107897  | 3.510779  | 2.772654  |
| H | -4.612714 | -0.749737 | -1.501968 | H | -4.148914 | -0.365882 | -0.165701 | H | 1.856724  | 1.548030  | 1.916739  |
| C | -3.126794 | 1.217466  | -0.388525 | C | -2.456473 | 1.963094  | -0.272527 | C | 2.726038  | -0.709488 | -1.556734 |
| C | -3.524770 | 2.053722  | -1.445248 | C | -2.281474 | 2.480788  | 1.021927  | C | 3.982557  | -0.914556 | -0.958630 |
| C | -4.507430 | 3.025904  | -1.233916 | C | -2.997943 | 3.607831  | 1.437130  | C | 4.871688  | -1.850619 | -1.490936 |
| C | -5.099427 | 3.166749  | 0.024509  | C | -3.898028 | 4.221015  | 0.561648  | C | 4.516673  | -2.597603 | -2.619798 |
| C | -4.708310 | 2.333941  | 1.078723  | C | -4.083522 | 3.706711  | -0.727602 | C | 3.269205  | -2.398444 | -3.218277 |
| C | -3.724076 | 1.366554  | 0.876576  | C | -3.368234 | 2.583024  | -1.145369 | C | 2.375547  | -1.462072 | -2.690416 |
| H | -3.417721 | 0.721916  | 1.704317  | H | -3.525290 | 2.180554  | -2.149357 | H | 1.404954  | -3.329828 | -3.172847 |
| H | -5.167720 | 2.442284  | 2.064078  | H | -4.791340 | 4.183528  | -1.409975 | H | 2.987422  | -2.975212 | -4.102594 |
| H | -5.867009 | 3.927783  | 0.184915  | H | -4.461286 | 5.099919  | 0.884689  | H | 5.213368  | -3.329278 | -3.034115 |
| H | -4.813023 | 3.673393  | -2.059302 | H | -2.856644 | 4.001892  | 2.446380  | H | 5.848141  | -1.995810 | -1.022257 |
| H | -3.082638 | 1.954511  | -2.438460 | H | -1.585730 | 2.003833  | 1.718580  | H | 4.273585  | -0.335819 | -0.078083 |
| H | -0.803776 | 1.331083  | -2.265705 | H | -0.119620 | 2.275359  | -1.792265 | H | 1.029352  | 1.111509  | -3.064913 |
| H | -1.677945 | -0.015896 | -3.025971 | H | -0.797745 | 1.255288  | -3.064230 | H | 0.300417  | 2.170363  | -1.846614 |
| H | 0.792195  | -0.380684 | -3.272935 | H | 1.725993  | 1.010655  | -2.858699 | H | -0.744328 | -0.623037 | -2.672138 |
| H | 0.107980  | -1.629924 | -2.207985 | H | 0.903284  | -0.539843 | -2.589586 | H | -1.520619 | 0.937971  | -3.015435 |

#### 410A-14

Geometry with 77 atoms:  
 Total energy: -3045.619330490  
 Cr 0.112009 -0.541234 1.012787  
 C 0.103315 -2.430518 0.240137  
 C -1.165863 -3.255848 0.457520  
 C -1.490604 -3.684152 1.902011  
 C -2.389268 -2.730915 2.705101  
 C -1.865618 -1.341410 3.091393  
 C -0.786329 -1.254405 4.182473  
 C 0.659332 -1.568826 3.776193  
 C 1.217440 -0.610134 2.718882  
 H 2.300026 -0.756699 2.576112  
 H 1.089095 0.449541 3.045943  
 H 0.742508 -2.609690 3.422103  
 H 1.281930 -1.523814 4.690346  
 H -1.095806 -1.917193 5.008980  
 H -0.801640 -0.230801 4.598080  
 H -2.731567 -0.742535 3.419309  
 H -1.568032 -0.784718 2.160793  
 H -2.685214 -3.231478 3.643854

#### 410A-15

Geometry with 77 atoms:  
 Total energy: -3045.617447950  
 Cr -0.189126 -0.749306 0.888295  
 C -1.540286 -0.951275 2.419049  
 C -1.145116 -1.589726 3.758709  
 C 0.204718 -1.129783 4.350518  
 C 1.446528 -1.960566 3.982871  
 C 1.702646 -2.163062 2.482356  
 C 1.107409 -3.437067 1.865299  
 C 1.006590 -3.385020 0.336134  
 C -0.152195 -2.509274 -0.144446  
 H -1.130303 -2.963345 0.094634  
 H -0.106899 -2.336875 -1.233254  
 H 0.877526 -4.411268 -0.055834  
 H 1.961020 -3.021935 -0.084589  
 H 0.109867 -3.636340 2.288578  
 H 1.745336 -4.278946 2.182049  
 H 2.783056 -2.146222 2.263196  
 H 1.382371 -1.225664 1.946547  
 H 1.370821 -2.956544 4.453350

#### 410A-16

Geometry with 77 atoms:  
 Total energy: -3045.620307740  
 Cr -0.071036 -0.794104 0.834349  
 C -1.444396 -1.116560 2.312832  
 C -0.553140 -0.314728 3.254954  
 C 0.296716 -1.131050 4.250990  
 C 0.932924 -2.401783 3.669701  
 C 1.874723 -2.184460 2.476179  
 C 1.991014 -3.368054 1.508174  
 C 0.701915 -3.671163 0.729829  
 C 0.247640 -2.544980 -0.210964  
 H -0.670580 -2.834261 -0.745616  
 H 1.028821 -2.361822 -0.971163  
 H -0.110288 -3.927942 1.431631  
 H 0.867596 -4.590212 0.135553  
 H 2.298539 -4.260047 2.081141  
 H 2.803688 -3.162864 0.790280  
 H 2.873283 -1.888608 2.839510  
 H 1.604660 -1.271186 1.884319  
 H 0.131467 -3.098973 3.383006

H 1.495663 -2.917593 4.464702  
H -0.354867 -1.426442 5.090078  
H 1.076575 -0.477966 4.680097  
H 0.162486 0.334262 2.649964  
H -1.116190 0.463947 3.795870  
H -1.594398 -2.164435 2.607986  
H -2.421240 -0.641684 2.142891  
P -1.714410 0.166770 -0.697173  
C -2.669945 1.496996 0.130154  
C -4.029095 1.335264 0.445103  
C -4.703020 2.324344 1.167950  
C -4.030873 3.476549 1.585648  
C -2.675843 3.640388 1.278737  
C -1.996264 2.655380 0.559572  
H -0.937002 2.801255 0.335247  
H -2.142856 4.538945 1.599473  
H -4.562141 4.247512 2.148940  
H -5.761943 2.192080 1.402951  
H -4.567847 0.441009 0.125533  
C -2.958553 -0.957782 -1.423653  
C -3.633726 -0.637564 -2.614226  
C -4.626752 -1.486783 -3.107261  
C -4.961109 -2.656440 -2.413140  
C -4.302473 -2.971579 -1.221694  
C -3.303803 -2.128674 -0.726793  
H -2.794682 -2.378639 0.205486  
H -4.563948 -3.879960 -0.673772  
H -5.738969 -3.316793 -2.801161  
H -5.146128 -1.231893 -4.034183  
H -3.401486 0.281207 -3.157569  
C -0.798428 1.005065 -2.096114  
C 0.593396 0.396674 -2.314602  
P 1.572212 0.430485 -0.733759  
C 1.972230 2.201930 -0.475516  
C 2.573157 2.973650 -1.486314  
C 2.855856 4.322457 -1.265941  
C 2.549257 4.913741 -0.033984  
C 1.964192 4.151954 0.980451  
C 1.677323 2.800327 0.760641  
H 1.221461 2.211214 1.561061  
H 1.731371 4.607450 1.945962  
H 2.773325 5.969851 0.134997  
H 3.321849 4.915488 -2.056631  
H 2.830807 2.518957 -2.446419  
C 3.174934 -0.370959 -1.102481  
C 3.401924 -1.140282 -2.255180  
C 4.623417 -1.800292 -2.428506  
C 5.624008 -1.698844 -1.459074  
C 5.405039 -0.929896 -0.309854  
C 4.187620 -0.272537 -0.129955  
H 4.025803 0.327620 0.770191  
H 6.186293 -0.843022 0.449224  
H 6.576360 -2.215902 -1.598867  
H 4.791772 -2.394627 -3.329874  
H 2.637487 -1.232908 -3.028584  
H 0.505616 -0.658088 -2.618865  
H 1.130302 0.929313 -3.115148  
H -1.393679 0.951730 -3.018948  
H -0.718314 2.071054 -1.833649

#### \*10A-17

Geometry with 77 atoms:

Total energy: -3045.617888650  
Cr -0.164801 -0.834010 0.844201  
C -1.429988 -1.289739 2.366825  
C -1.027840 -2.314151 3.431818  
C 0.381797 -2.178489 4.046142  
C 1.517773 -2.937216 3.336773  
C 2.019780 -2.384322 1.982844  
C 1.925949 -3.346596 0.791651  
C 0.496884 -3.670833 0.338907  
C -0.218434 -2.496497 -0.333940  
H -1.275927 -2.732632 -0.539005  
H 0.279948 -2.233949 -1.285215  
H -0.095225 -4.034440 1.195900  
H 0.537128 -4.520969 -0.368559  
H 2.447416 -4.275678 1.079356  
H 2.489380 -2.929948 -0.059864  
H 3.062326 -2.041607 2.080869  
H 1.515352 -1.405049 1.754564  
H 1.197733 -3.984177 3.200281

H 2.377263 -2.980492 4.024906  
H 0.342561 -2.558671 5.080037  
H 0.648277 -1.107068 4.141146  
H -1.759664 -2.255011 4.259896  
H -1.142993 -3.334773 3.025837  
H -2.433555 -1.522201 1.971876  
H -1.494980 -0.272097 2.823297  
P -1.806593 0.315698 -0.573207  
C -2.282027 2.010917 -0.072174  
C -1.440113 2.722165 0.800163  
C -1.732542 4.044286 1.144065  
C -2.874661 4.662233 0.626666  
C -3.720655 3.958306 -0.238149  
C -3.427844 2.639097 -0.590753  
H -4.095664 2.096759 -1.264214  
H -4.614361 4.440271 -0.641873  
H -3.108345 5.694582 0.898106  
H -1.067108 4.588571 1.818319  
H -0.540799 2.252172 1.205929  
C -3.352383 -0.583286 -0.920111  
C -4.367947 -0.565386 0.054616  
C -5.537391 -1.302417 -0.136898  
C -5.703368 -2.069149 -1.295717  
C -4.695621 -2.095955 -2.263226  
C -3.521777 -1.358800 -2.079177  
H -2.748834 -1.396922 -2.848376  
H -4.821218 -2.692110 -3.170214  
H -6.619545 -2.645722 -1.444019  
H -6.322199 -1.278754 0.622937  
H -4.248540 0.032107 0.961707  
C -0.923954 0.548738 -2.195882  
C 0.394472 1.311851 -1.997570  
P 1.473476 0.560650 -0.664432  
C 2.375388 1.980409 0.057515  
C 2.300129 2.206305 1.442092  
C 2.954199 3.300320 2.018102  
C 3.687837 4.175168 1.212663  
C 3.773482 3.953271 -0.167395  
C 3.124073 2.860570 -0.744145  
C 3.205219 2.689643 -1.820881  
H 4.352254 4.634326 -0.796045  
H 4.199101 5.030863 1.660441  
H 2.891065 3.467108 3.096091  
H 1.730882 1.525558 2.082115  
C 2.745051 -0.425739 -1.537624  
C 3.998387 -0.623085 -0.930352  
C 4.936152 -1.478570 -1.512218  
C 4.633963 -2.150641 -2.701495  
C 3.390932 -1.957807 -3.311028  
C 2.448438 -1.101466 -2.733599  
H 1.483520 -0.966305 -3.227597  
H 3.150821 -2.476108 -4.242571  
H 5.368168 -2.821442 -3.153857  
H 5.908833 -1.619430 -1.034498  
H 4.248041 -0.102611 -0.002201  
H 0.954042 1.374804 -2.943336  
H 0.192365 2.344006 -1.671949  
H -0.744055 -0.457073 -2.606815  
H -1.585545 1.084529 -2.895070

#### \*10A-18

Geometry with 77 atoms:

Total energy: -3045.617541840  
Cr 0.168682 -0.553528 1.024825  
C 0.155880 -2.438741 0.210380  
C -1.101588 -3.203173 0.639660  
C -1.028646 -3.913341 2.002579  
C -0.470254 -3.071856 3.156685  
C -1.187290 -1.737860 3.409088  
C -0.435207 -0.774835 4.348142  
C 0.461889 0.238829 3.620212  
C 1.460121 -0.350162 2.613175  
H 1.940412 -1.270906 2.978911  
H 2.252188 0.381140 2.379826  
H 0.984576 0.867218 4.365154  
H -0.205514 0.973267 3.103987  
H 0.180636 -1.367946 5.045866  
H -1.154708 -0.220000 4.971737  
H -2.203092 -1.943175 3.786800  
H -1.411797 -1.210378 2.445437  
H 0.598458 -2.884228 2.975001

H -0.510518 -3.658838 4.089888  
H -0.394245 -4.811097 1.904459  
H -2.038054 -4.279604 2.260846  
H -1.974553 -2.524824 0.621724  
H -1.346748 -3.960574 -0.127858  
H 1.091638 -2.944339 0.505741  
H 0.173217 -2.307365 -0.885755  
P 1.771600 0.258408 -0.631712  
C 3.248359 -0.759269 -0.967710  
C 3.819742 -0.841214 -2.250336  
C 4.954864 -1.627785 -2.462894  
C 5.530623 -2.333287 -1.401719  
C 4.968305 -2.253402 -0.123964  
C 3.830499 -1.473594 0.094276  
H 3.392650 -1.423123 1.091941  
H 5.413481 -2.804969 0.707453  
H 6.418054 -2.947671 -1.572044  
H 5.391135 -1.687727 -3.462881  
H 3.391547 -0.291637 -3.090809  
C 2.339730 1.966689 -0.291942  
C 1.411340 2.881408 0.240256  
C 1.788912 4.200303 0.499548  
C 3.100535 4.614092 0.243660  
C 4.031054 3.706214 -0.270918  
C 3.656468 2.386324 -0.539675  
H 4.392325 1.684470 -0.938042  
H 5.058128 4.025297 -0.464199  
H 3.398928 5.644516 0.451395  
H 1.058581 4.903109 0.907729  
H 0.385536 2.570580 0.455772  
C 0.858322 0.372875 -2.251731  
C -0.506204 1.059655 -2.105703  
P -1.564256 0.375654 -0.720246  
C -2.678819 -0.851406 -1.499914  
C -2.274793 -1.612432 -2.609406  
C -3.100150 -2.625706 -3.170736  
C -4.332074 -2.891060 -2.503283  
C -4.740910 -2.135912 -1.398607  
C -3.919718 -1.125342 -0.895896  
H -4.250960 -0.543585 -0.031623  
H -5.705394 -2.334403 -0.924765  
H -4.974869 -3.683412 -2.894036  
H -2.776789 -3.208701 -3.972821  
H -1.316813 -1.427072 -3.099042  
C -2.645497 1.785306 -0.269483  
C -2.543372 2.347062 1.013836  
C -3.324737 3.452050 1.367816  
C -4.216244 3.999928 0.442231  
C -4.329264 3.441426 -0.837009  
C -3.550178 2.339650 -1.193387  
H -3.653558 1.903888 -2.190339  
H -5.030654 3.865942 -1.559443  
H -4.829076 4.861742 0.717617  
H -3.238994 3.879807 2.369557  
H -1.857141 1.921262 1.750916  
H -0.368257 2.125694 -1.868359  
H -1.065721 1.015717 -3.052940  
H 1.474897 0.920276 -2.981303  
H 0.762365 -0.663197 -2.613537

#### \*10A-19

Geometry with 77 atoms:

Total energy: -3045.617589730  
Cr -0.092199 -0.647521 0.950145  
C -1.408084 -1.182707 2.435585  
C -0.829251 -1.221110 3.860485  
C 0.189941 -2.336171 4.169586  
C 1.669055 -2.007583 3.904484  
C 2.131362 -1.679172 2.478843  
C 2.229234 -2.829642 1.464140  
C 0.915712 -3.401119 0.909646  
C 0.142887 -2.438894 0.007682  
H -0.861075 -2.820823 -0.233799  
H 0.684702 -2.259237 -0.938499  
H 0.270769 -3.745745 1.732374  
H 1.161294 -4.311723 0.329914  
H 2.803363 -3.636666 1.950867  
H 2.844516 -2.490571 6.133366  
H 3.130636 -1.218017 2.549844  
H 1.540719 -0.802368 2.095914  
H 2.287215 -2.851601 4.257853

H 1.939793 -1.151847 4.548603  
H -0.107335 -3.259200 3.645560  
H 0.119319 -2.576295 5.243530  
H -0.383789 -0.241331 4.128393  
H -1.671952 -1.338820 4.567974  
H -1.849120 -2.160909 2.170842  
H -2.229863 -0.441362 2.394398  
P -1.775483 0.266514 -0.627847  
C -2.990262 1.445313 0.064546  
C -4.308173 1.532274 -0.411951  
C -5.182875 2.479524 0.127769  
C -4.750932 3.343074 1.139210  
C -3.438597 3.260505 1.617025  
C -2.562395 2.312630 1.085506  
H -1.540064 2.252068 1.470911  
H -3.099016 3.930755 2.410204  
H -5.439584 4.080109 1.559340  
H -6.207892 2.542521 -0.245407  
H -4.655153 0.860687 -1.200433  
C -2.725306 -1.048526 -1.461519  
C -2.629547 -1.307438 -2.837379  
C -3.343819 -2.370501 -3.400710  
C -4.155271 -3.176465 -2.598817  
C -4.251520 -2.923542 -1.225043  
C -3.535542 -1.870782 -0.655343  
H -3.606078 -1.686950 0.419963  
H -4.883776 -3.552575 -0.593944  
H -4.713231 -4.004270 -3.042968  
H -3.265623 -2.565112 -4.473053  
H -2.004730 -0.689399 -3.484821  
C -0.880444 1.241322 -1.938461  
C 0.497795 0.654879 -2.266783  
P 1.537186 0.568581 -0.722198  
C 1.953245 2.316155 -0.364440  
C 1.675791 2.832198 0.912420  
C 1.964597 4.166478 1.217300  
C 2.533758 4.993678 0.245981  
C 2.819985 4.486083 -1.027627  
C 2.534016 3.154563 -1.332984  
H 2.773609 2.764290 -2.325571  
H 3.272167 5.131707 -1.784423  
H 2.760388 6.036525 0.480982  
H 1.747545 4.557270 2.214288  
H 1.242063 2.188599 1.683899  
C 3.111520 -0.224420 -1.215846  
C 4.297566 0.123998 -0.543595  
C 5.486947 -0.557040 -0.812306  
C 5.509534 -1.592307 -1.752650  
C 4.335602 -1.943291 -2.425197  
C 3.141224 -1.268278 -2.157788  
H 2.237127 -1.567900 -2.691225  
H 4.346068 -2.748409 -3.163978  
H 6.441393 -2.122823 -1.962556  
H 6.401894 -0.273919 -0.286050  
H 4.298720 0.934983 0.188943  
H 0.403839 -0.370629 -2.656034  
H 1.008709 1.253593 -3.036777  
H -1.514216 1.328492 -2.834387  
H -0.782644 2.258845 -1.527464

\*10A-20

Geometry with 77 atoms:

Total energy: -3045.619444410  
Cr -0.153844 -0.793924 0.856926  
C -1.387890 -1.326189 2.393769  
C -0.631921 -1.575334 3.710379  
C 0.216557 -2.861599 3.797058  
C 1.694673 -2.735165 3.391541  
C 2.058787 -2.353792 1.950851  
C 1.852919 -3.399851 0.845600  
C 0.412045 -3.655617 0.384017  
C -0.236526 -2.461752 -0.318636  
H -1.294251 -2.666441 -0.553376  
H 0.296444 -2.223725 -1.257663  
H -0.212589 -3.980648 1.230342  
H 0.427006 -4.514591 -0.314381  
H 2.301323 -4.343569 1.201089  
H 2.446095 -3.091595 -0.032424  
H 3.122526 -2.063506 1.942807  
H 1.583615 -1.368175 1.688967  
H 2.202974 -3.691026 3.608922

H 2.161517 -1.992588 4.063388  
H -0.278556 -3.666879 3.230832  
H 0.216571 -3.201496 4.845886  
H 0.007931 -0.703956 3.963825  
H -1.374337 -1.609281 4.530336  
H -2.015314 -2.191674 2.118731  
H -2.067910 -0.460008 2.519865  
P -1.815943 0.324674 -0.558083  
C -2.328305 2.000737 -0.026865  
C -3.538768 2.574945 -0.451415  
C -3.866224 3.877345 -0.066745  
C -2.992777 4.616734 0.738455  
C -1.787862 4.050744 1.165870  
C -1.459447 2.746144 0.789774  
H -0.512311 2.316870 1.127393  
H -1.101942 4.622366 1.795573  
H -3.253979 5.635368 1.035362  
H -4.809868 4.317475 -0.398194  
H -4.229522 2.005225 -1.077354  
C -3.342526 -0.602270 -0.918341  
C -3.647286 -1.101279 -2.195332  
C -4.814670 -1.845146 -2.395235  
C -5.682299 -2.094519 -1.328987  
C -5.382626 -1.599168 -0.054673  
C -4.217551 -0.860733 0.153512  
H -3.988958 -0.483100 1.152637  
H -6.057649 -1.792561 0.782350  
H -6.593498 -2.675625 -1.490013  
H -5.045417 -2.228931 -3.391889  
H -2.987143 -0.916907 -3.044397  
C -0.944433 0.588951 -2.180798  
C 0.376510 1.349285 -1.990044  
P 1.470377 0.589445 -0.677183  
C 2.423987 1.995149 0.003647  
C 2.345593 2.274048 1.378198  
C 3.041112 3.359447 1.921005  
C 3.820136 4.171061 1.092300  
C 3.909083 3.895323 -0.277888  
C 3.217806 2.811589 -0.821767  
H 3.302204 2.595301 -1.890037  
H 4.523803 4.526737 -0.924005  
H 4.364739 5.019260 1.514286  
H 2.975964 3.567884 2.991607  
H 1.742736 1.640420 2.035641  
C 2.697944 -0.443380 -1.559943  
C 3.931834 -0.713592 -0.940361  
C 4.835000 -1.602541 -1.526334  
C 4.516889 -2.236807 -2.732352  
C 3.293637 -1.971595 -3.354093  
C 2.385971 -1.080763 -2.772448  
H 1.435921 -0.889770 -3.276302  
H 3.041428 -2.460051 -4.298462  
H 5.223696 -2.934348 -3.187880  
H 5.792826 -1.799814 -1.038669  
H 4.194537 -0.222538 0.000168  
H 0.923862 1.424820 -2.942195  
H 0.177874 2.377734 -1.650526  
H -0.772927 -0.413297 -2.604978  
H -1.609894 1.136575 -2.866829

\*10A-21

Geometry with 77 atoms:

Total energy: -3045.616933500  
Cr 0.121821 -0.564732 1.035646  
C 1.573193 -0.536717 2.484604  
C 0.798242 0.237101 3.562881  
C -0.233165 -0.589555 4.348354  
C -1.164489 -1.439437 3.459629  
C -0.701685 -2.890104 3.263658  
C -1.436430 -3.688840 2.181362  
C -1.444163 -3.053641 0.779783  
C -0.110311 -2.467873 0.301135  
H -0.076420 -2.394748 -0.799381  
H 0.764136 -3.062271 0.617011  
H -2.232714 -2.279665 0.731119  
H -1.787999 -3.821078 0.061128  
H -2.480649 -3.869292 2.491548  
H -0.960070 -4.682569 2.122349  
H -0.815224 -3.404589 4.232972  
H 0.377618 -2.905372 3.051856  
H -1.331055 -0.914539 2.477845

H -2.193434 -1.443627 3.856805  
H -0.828849 0.090366 4.978338  
H 0.295880 -1.264541 5.042074  
H 1.487151 0.734221 4.270748  
H 0.260686 1.093201 3.087654  
H 2.465082 0.030233 2.172830  
H 1.904218 -1.529875 2.826446  
P -1.624477 0.392135 -0.661302  
C -1.911864 2.192913 -0.435342  
C -2.478250 2.985491 -1.450490  
C -2.651025 4.357323 -1.259381  
C -2.265633 4.954827 -0.052846  
C -1.712310 4.175781 0.965959  
C -1.537472 2.801015 0.774735  
H -1.114636 2.203114 1.586860  
H -1.418427 4.635226 1.912793  
H -2.403121 6.028964 0.093395  
H -3.092050 4.964310 -2.053734  
H -2.795008 2.528863 -2.391769  
C -3.272054 -0.316927 -1.029405  
C -3.402673 -1.449528 -1.852723  
C -4.655172 -2.037090 -2.047800  
C -5.787192 -1.508923 -1.419735  
C -5.663172 -0.386666 -0.594894  
C -4.414311 0.207399 -0.398187  
H -4.334443 1.088981 0.242433  
H -6.544033 0.033141 -0.102932  
H -6.765311 -1.970924 -1.573772  
H -4.745139 -2.912939 -2.694925  
H -2.532153 -1.886467 -2.346414  
C -0.688002 0.808312 -2.273227  
C 0.703234 0.932517 -2.113826  
P 1.673451 0.158791 -0.727423  
C 2.902567 1.430571 -0.266782  
C 4.263660 1.333212 -0.591816  
C 5.147200 2.342441 -0.195624  
C 4.680916 3.447890 0.521291  
C 3.323024 3.548972 0.846120  
C 2.437652 2.542669 0.459108  
H 1.378496 2.626086 0.720580  
H 2.954687 4.410879 1.407660  
H 5.376243 4.232050 0.830244  
H 6.206611 2.262215 -0.451067  
H 4.638636 0.473311 -1.150382  
C 2.581231 -1.273448 -1.403622  
C 3.361422 -2.029610 -0.508377  
C 4.042477 -3.162053 -0.955582  
C 3.938567 -3.562482 -2.292909  
C 3.155556 -2.822861 -3.182340  
C 2.479244 -1.679902 -2.742979  
H 1.874589 -1.118432 -3.457548  
H 3.069786 -3.132476 -4.226699  
H 4.466888 -4.453808 -2.639821  
H 4.651610 -3.739112 -2.558000  
H 3.434418 -1.732272 0.540668  
H 1.281460 0.892320 -3.049553  
H 0.621569 1.998682 -1.848552  
H -0.612065 -0.752816 -2.556936  
H -1.258138 0.818288 -3.065083

\*10A-22

Geometry with 77 atoms:

Total energy: -3045.616859520  
Cr 0.095526 -0.594796 0.987880  
C -0.105389 -2.460748 0.204179  
C -0.962183 -3.351143 1.107375  
C -2.262585 -2.696265 1.594738  
C -2.065030 -1.579439 2.627837  
C -1.508871 -2.030387 3.995660  
C -0.263241 -1.295046 4.515271  
C 1.063655 -1.593725 3.787355  
C 1.392955 -0.749945 2.550831  
H 2.408129 -0.991139 2.189637  
H 1.419874 0.332765 2.824190  
H 1.096638 -2.667665 3.527121  
H 1.879455 -1.454840 4.522187  
H -0.141599 -1.575995 5.574259  
H -0.446558 -0.203046 4.520923  
H -1.280436 -3.108760 3.958828  
H -2.311761 -1.925113 4.743127  
H -3.017845 -1.042689 2.763088

|             |           |           |             |           |           |             |           |           |
|-------------|-----------|-----------|-------------|-----------|-----------|-------------|-----------|-----------|
| H -1.425518 | -0.745267 | 2.231713  | H 2.207949  | -2.934206 | 4.303730  | H -2.404769 | -1.579162 | 3.389559  |
| H -2.910346 | -3.458631 | 2.060578  | H 0.301493  | -2.128430 | 5.407842  | H -0.534042 | -0.640201 | 4.568774  |
| H -2.823540 | -2.304681 | 0.730173  | H 0.832685  | -0.757131 | 4.444369  | H -0.570065 | -2.356636 | 4.976597  |
| H -1.218157 | -4.279010 | 0.561621  | H -1.705750 | -1.366766 | 4.612036  | H 1.282589  | -2.795419 | 3.332747  |
| H -0.365953 | -3.680723 | 1.975612  | H -1.375176 | -2.681282 | 3.497736  | H 1.739434  | -1.649765 | 4.581249  |
| H 0.905303  | -2.875173 | 0.064010  | H -2.341723 | -0.614323 | 2.406227  | H 1.372903  | 0.283136  | 2.988717  |
| H -0.568170 | -2.339683 | -0.792957 | H -0.930039 | 0.327701  | 2.905007  | H 2.530375  | -0.891883 | 2.310780  |
| P -1.550190 | 0.507122  | -0.731947 | P -1.809032 | 0.296474  | -0.598332 | P -1.509300 | 0.495320  | -0.630198 |
| C -1.928114 | 2.275570  | -0.430521 | C -2.389047 | 1.954549  | -0.071036 | C -2.406660 | 1.947862  | 0.035026  |
| C -2.582629 | 3.066118  | -1.392476 | C -1.447696 | 2.850788  | 0.471166  | C -3.245973 | 2.728253  | -0.780052 |
| C -2.817542 | 4.419964  | -1.147454 | C -1.840634 | 4.124884  | 0.884428  | C -3.877983 | 3.857574  | -0.257112 |
| C -2.404042 | 4.999628  | 0.058549  | C -3.180337 | 4.513016  | 0.777249  | C -3.682856 | 4.217121  | 1.082223  |
| C -1.758994 | 4.221747  | 1.023097  | C -4.123273 | 3.622382  | 0.256202  | C -2.857261 | 3.442932  | 1.901638  |
| C -1.523302 | 2.864354  | 0.779512  | C -3.734013 | 2.347928  | -0.167000 | C -2.222282 | 2.310998  | 1.379972  |
| H -1.026859 | 2.265170  | 1.548584  | H -4.482553 | 1.662195  | -0.568627 | H -1.586801 | 1.706583  | 2.034499  |
| H -1.441348 | 4.668728  | 1.968187  | H -5.172254 | 3.918367  | 0.178447  | H -2.709787 | 3.715491  | 2.949428  |
| H -2.590241 | 6.059841  | 0.246620  | H -3.489988 | 5.507961  | 1.106169  | H -4.181480 | 5.100797  | 1.487899  |
| H -3.327442 | 5.027061  | -1.899414 | H -1.098283 | 4.812305  | 1.297200  | H -4.528708 | 4.459809  | -0.895828 |
| H -2.918703 | 2.621730  | -2.332877 | H -0.398637 | 2.563109  | 0.575240  | H -3.412619 | 2.447958  | -1.823412 |
| C -3.138092 | -0.278423 | -1.181965 | C -3.289296 | -0.684643 | -1.028016 | C -2.779801 | -0.500306 | -1.497590 |
| C -3.182311 | -1.363278 | -2.075702 | C -3.944861 | -0.530704 | -2.262946 | C -2.523229 | -1.107453 | -2.738663 |
| C -4.385146 | -2.036328 | -2.307054 | C -5.080101 | -1.291336 | -2.553718 | C -3.475363 | -1.949001 | -3.321696 |
| C -5.551920 | -1.642125 | -1.645641 | C -5.571996 | -2.206883 | -1.617756 | C -4.688855 | -2.195497 | -2.673418 |
| C -5.513709 | -0.566748 | -0.752062 | C -4.925395 | -2.363590 | -0.388228 | C -4.951238 | -1.592869 | -1.438565 |
| C -4.315632 | 0.111817  | -0.518520 | C -3.787253 | -1.609301 | -0.093545 | C -4.002974 | -0.753177 | -0.850948 |
| H -4.302413 | 0.952665  | 0.179440  | H -3.279113 | -1.747331 | 0.861993  | H -4.222972 | -0.285808 | 0.112378  |
| H -6.422785 | -0.251227 | -0.234144 | H -5.303913 | -3.080316 | 0.344400  | H -5.900060 | -1.776905 | -0.928723 |
| H -6.490617 | -2.170868 | -1.827635 | H -6.459794 | -2.800594 | -1.848917 | H -5.430800 | -2.854417 | -3.130620 |
| H -4.408322 | -2.873799 | -3.008591 | H -5.583066 | -1.166371 | -3.515620 | H -3.265452 | -2.414372 | -4.287844 |
| H -2.282785 | -1.694982 | -2.598208 | H -3.580324 | 0.184331  | -3.003061 | H -1.579182 | -0.937822 | -3.261016 |
| C -0.534338 | 0.544685  | -2.294517 | C -0.918593 | 0.563642  | -2.217514 | C -0.425067 | 1.206595  | -1.980033 |
| C 0.841357  | 1.152978  | -2.001206 | C 0.442284  | 1.256143  | -2.060373 | C 0.861512  | 0.395307  | -2.186688 |
| P 1.756142  | 0.222484  | -0.673662 | P 1.534862  | 0.501353  | -0.738503 | P 1.809136  | 0.247765  | -0.591065 |
| C 2.993236  | 1.416594  | -0.048230 | C 2.508160  | 1.920405  | -0.114299 | C 2.383721  | 0.953681  | -0.260345 |
| C 4.370423  | 1.286992  | -0.282832 | C 2.381585  | 2.294672  | 1.233860  | C 3.579792  | 2.457573  | -0.799419 |
| C 5.258396  | 2.234238  | 0.237053  | C 3.070995  | 3.407251  | 1.727487  | C 3.942983  | 3.787184  | -0.571783 |
| C 4.781597  | 3.312360  | 0.987457  | C 3.893529  | 4.150025  | 0.876635  | C 3.117499  | 4.624835  | 0.186404  |
| C 3.408231  | 3.448005  | 1.220680  | C 4.030738  | 3.779089  | -0.466884 | C 1.923846  | 4.131202  | 0.721335  |
| C 2.517620  | 2.502899  | 0.710534  | C 3.343929  | 2.669654  | -0.962181 | C 1.560770  | 2.800042  | 0.503303  |
| H 1.446180  | 2.620274  | 0.898275  | H 3.463771  | 2.380826  | -2.009430 | H 0.622116  | 2.429864  | 0.923236  |
| H 3.030626  | 4.290021  | 1.805727  | H 4.678164  | 4.357240  | -1.130718 | H 1.273703  | 4.780131  | 1.312906  |
| H 5.480130  | 4.048626  | 1.392261  | H 4.433600  | 5.019130  | 1.260150  | H 3.406465  | 5.664016  | 0.361340  |
| H 6.329723  | 2.127472  | 0.050257  | H 2.966831  | 3.690156  | 2.777683  | H 4.876250  | 4.171278  | -0.990667 |
| H 4.755367  | 0.450534  | -0.869191 | H 1.742526  | 1.717056  | 1.908246  | H 4.231718  | 1.812452  | -1.392695 |
| C 2.659125  | -1.140371 | -1.488416 | C 2.728230  | -0.574338 | -1.613890 | C 3.288531  | -0.760269 | -0.933370 |
| C 3.426872  | -1.997238 | -0.676624 | C 2.339686  | -1.311505 | -2.746009 | C 4.326183  | -0.769888 | 0.017966  |
| C 4.105056  | -3.079255 | -1.238168 | C 3.222552  | -2.224804 | -3.329507 | C 5.444331  | -1.583122 | -0.169855 |
| C 4.010876  | -3.330508 | -2.611864 | C 4.497292  | -2.415371 | -2.788767 | C 5.536484  | -2.401077 | -1.301614 |
| C 3.240825  | -2.491925 | -3.420939 | C 4.889085  | -1.687109 | -1.660424 | C 4.508060  | -2.398972 | -2.247179 |
| C 2.567468  | -1.398846 | -2.865388 | C 4.010834  | -0.774468 | -1.071881 | C 3.386098  | -1.583846 | -2.066981 |
| H 1.975633  | -0.758494 | -3.521493 | H 4.330886  | -0.210882 | -0.191801 | H 2.597646  | -1.599228 | -2.820797 |
| H 3.162803  | -2.684562 | -4.493640 | H 5.886062  | -1.828003 | -1.235782 | H 4.575968  | -3.033759 | -3.133850 |
| H 4.536850  | -4.182106 | -3.050034 | H 5.185959  | -3.129323 | -3.246666 | H 6.411557  | -3.039127 | -1.446145 |
| H 4.704108  | -3.732849 | -0.599748 | H 2.910924  | -2.789015 | -4.211884 | H 6.246643  | -1.579213 | 0.571857  |
| H 3.495375  | -1.817828 | 0.398655  | H 1.346355  | -1.184107 | -3.181959 | H 4.267151  | -0.131478 | 0.902785  |
| H 1.464563  | 1.221088  | -2.905732 | H 0.979879  | 1.267209  | -3.021259 | H 0.630463  | -0.628484 | -2.520444 |
| H 0.739025  | 2.181485  | -1.621457 | H 0.299762  | 2.306235  | -1.762781 | H 1.504834  | 0.862332  | -2.949237 |
| H -0.436157 | -0.491203 | -2.654603 | H -0.815977 | -0.440847 | -2.659238 | H -0.995450 | 1.282621  | -2.918322 |
| H -1.061841 | 1.116651  | -3.073647 | H -1.560130 | 1.154232  | -2.889803 | H -0.186778 | 2.235421  | -1.669054 |

#### \*10A-23

Geometry with 77 atoms:

Total energy: -3045.616507950  
 Cr -0.151406 -0.713458 0.916652  
 C -1.262738 -0.702695 2.618261  
 C -1.034845 -1.669096 3.785452  
 C 0.389056 -1.768807 4.369626  
 C 1.356949 -2.713184 3.639258  
 C 1.920967 -2.209959 2.296759  
 C 1.907289 -3.230518 1.153418  
 C 0.501695 -3.607282 0.668472  
 C -0.211379 -2.486915 -0.091533  
 H -1.259859 -2.752715 -0.299779  
 H 0.293813 -2.288804 -1.055001  
 H -0.116238 -3.929599 1.524981  
 H 0.578782 -4.496095 0.014025  
 H 2.436186 -4.131405 1.509595  
 H 2.494573 -2.843769 0.303593  
 H 2.941750 -1.817967 2.434547  
 H 1.382449 -1.267528 2.009594  
 H 0.844321 -3.677178 3.485775

#### \*10A-24

Geometry with 77 atoms:

Total energy: -3045.616555230  
 Cr 0.196041 -0.677934 1.022287  
 C 1.477714 -0.760979 2.609779  
 C 1.087498 -1.770735 3.695334  
 C -0.372137 -1.650479 4.151685  
 C -1.406633 -1.907174 3.052718  
 C -1.513558 -3.344547 2.522458  
 C -2.086674 -3.409800 1.096874  
 C -1.036869 -3.347966 -0.038627  
 C 0.248612 -2.550015 0.198657  
 H 0.833713 -2.497465 -0.736388  
 H 0.903423 -3.036163 0.944687  
 H -1.536476 -2.985024 -0.950453  
 H -0.727464 -4.386504 -0.268222  
 H -2.819455 -2.592617 0.973690  
 H -2.669045 -4.335746 0.968938  
 H -2.158264 -3.903697 3.219856  
 H -0.533412 -3.845186 2.557558  
 H -1.265738 -1.195581 2.189708

#### \*10A-25(10)

Geometry with 77 atoms:

Total energy: -3045.615287740  
 Cr -0.055939 -0.585815 0.956540  
 C -1.157236 -2.338316 0.798537  
 C -0.499485 -2.665878 2.103452  
 C -1.366496 -2.655053 3.375329  
 C -2.372886 -1.498712 3.511275  
 C -1.895561 -0.057632 3.268691  
 C -0.795611 0.533517 4.162851  
 C 0.642766 0.058066 3.910450  
 C 1.137868 0.250984 2.470558  
 H 2.193345 -0.059096 2.383609  
 H 1.114738 1.324355 2.188470  
 H 0.749524 -0.999415 4.205771  
 H 1.302985 0.612391 4.605076  
 H -1.067748 0.354359 5.217967  
 H -0.815652 1.630162 4.029841  
 H -2.785952 0.588706 3.345318  
 H -1.616336 0.074735 2.193586  
 H -2.805713 -1.547016 4.525013

H -3.215942 -1.680338 2.823281  
H -0.699042 -2.679617 4.251560  
H -1.936569 -3.598734 3.404779  
H 0.097614 -3.592420 2.059984  
H 0.343835 -1.905053 2.296566  
H -0.821568 -2.934813 -0.062632  
H -2.249935 -2.252104 0.811269  
P 1.767187 -0.017757 -0.659551  
C 2.677897 -1.517440 -1.184799  
C 3.567208 -1.485703 -2.274636  
C 4.248937 -2.641835 -2.657259  
C 4.051695 -3.838696 -1.957717  
C 3.174283 -3.877182 -0.871080  
C 2.490307 -2.720476 -0.485057  
H 1.808475 -2.755933 0.367982  
H 3.020371 -4.808608 -0.321165  
H 4.587146 -4.741889 -2.260533  
H 4.940060 -2.609094 -3.503031  
H 3.741584 -0.553890 -2.818739  
C 3.023543 1.229413 -0.198882  
C 2.623590 2.570006 -0.046113  
C 3.534759 3.530946 0.395087  
C 4.849763 3.164253 0.701138  
C 5.249037 1.832201 0.563734  
C 4.342275 0.865408 0.118511  
H 4.668967 -0.171450 0.017090  
H 6.274171 1.539518 0.803499  
H 5.561342 3.916628 1.049658  
H 3.214436 4.570033 0.503831  
H 1.596660 2.872700 -0.265154  
C 0.976453 0.630295 -2.221822  
C -0.393789 -0.020101 -2.445544  
P -1.447255 0.212451 -0.930721  
C -3.067324 -0.550775 -1.286500  
C -3.236974 -1.528688 -2.279077  
C -4.480353 -2.146936 -2.449274  
C -5.558389 -1.798990 -1.631819  
C -5.394004 -0.825943 -0.638981  
C -4.156115 -0.205998 -0.464221  
H -4.039165 0.565541 0.310999  
H -6.234842 -0.547228 0.000825  
H -6.527989 -2.283921 -1.768129  
H -4.603889 -2.903609 -3.227955  
H -2.409000 -1.818842 -2.928469  
C -1.769291 2.019841 -0.897190  
C -2.539251 2.635595 -1.900372  
C -2.740836 4.016672 -1.879867  
C -2.180399 4.795269 -0.859568  
C -1.419335 4.190083 0.143852  
C -1.215079 2.806253 0.126310  
H -0.620158 2.342676 0.916824  
H -0.985689 4.792269 0.945848  
H -2.344072 5.875574 -0.845479  
H -3.341531 4.488660 -2.661158  
H -2.992451 2.034079 -2.692697  
H -0.900438 0.409683 -3.323844  
H -0.287300 -1.103919 -2.614323  
H 0.873527 1.720710 -2.109393  
H 1.643953 0.455680 -3.078804

#10B-01

Geometry with 85 atoms:

Total energy: -3274.529005580  
Cr -0.425211 -0.839517 0.850253  
C 0.701078 -1.616462 2.394963  
C -0.158042 -2.487279 3.324570  
C -1.389575 -1.767920 3.892953  
C -2.442004 -1.269781 2.887789  
C -3.448658 -2.285652 2.332777  
H -3.963716 -2.726188 3.204709  
H -4.224721 -1.725345 1.780920  
C -2.960924 -3.429868 1.430937  
C -2.414171 -3.036619 0.046126  
C -0.939371 -2.619384 -0.030716  
H -0.307645 -3.393841 0.438463  
H -0.622637 -2.544150 -1.087405  
H -2.544931 -3.915305 -0.614577  
H -3.067698 -2.259865 -0.389980  
H -3.832860 -4.086217 1.271480  
H -2.220355 -4.051622 1.960245  
H -1.983347 -0.692201 2.042490

H -3.024414 -0.466578 3.370217  
H -1.036835 -0.901143 4.479490  
H -1.906779 -2.423165 4.615442  
H 0.447844 -2.840845 4.181509  
H -0.469391 -3.402831 2.797445  
H 1.541043 -2.211065 1.997017  
H 1.157289 -0.777879 2.955081  
P -1.594326 0.428616 -1.009512  
C -3.281703 0.171809 -1.653941  
C -3.524312 -0.544827 -2.837458  
C -4.836650 -0.829256 -3.228573  
C -5.913515 -0.405281 -2.445837  
C -5.677440 0.309706 -1.265878  
C -4.370435 0.594135 -0.868527  
H -4.196434 1.150191 0.056825  
H -6.516049 0.646383 -0.651413  
H -6.937307 -0.630366 -2.754076  
H -5.015655 -1.386000 -4.151675  
H -2.698108 -0.893194 -3.460456  
C -1.509128 2.188123 -0.513672  
C -1.923268 3.218807 -1.372352  
C -1.810301 4.557471 -0.999198  
C -1.275623 4.870994 0.253409  
C -0.862298 3.865130 1.130166  
C -0.978838 2.519396 0.752061  
O -0.579756 1.486251 1.576072  
C -0.164356 1.813124 2.911077  
H -0.957002 2.370356 3.434019  
H 0.010325 0.864867 3.426289  
H 0.770387 2.393139 2.896460  
H -0.442623 1.425329 2.095268  
H -1.177326 5.914709 0.561601  
H -2.137761 5.348521 -1.676827  
H -2.349322 2.959995 -2.345385  
C -0.438261 0.323524 -2.460041  
C 0.984569 0.713605 -2.038651  
P 1.549210 -0.178704 -0.490331  
C 2.530932 1.011240 0.507749  
C 3.415025 0.483010 1.465441  
C 4.121064 1.332741 2.319361  
C 3.590453 2.718853 2.233168  
C 3.069690 3.248781 1.285927  
C 2.361302 2.401239 0.428545  
H 1.673684 2.844485 -0.291812  
H 2.929387 4.329924 1.208490  
H 4.504578 3.383289 2.900682  
H 4.808807 0.908773 3.055132  
H 3.556800 -0.597144 1.543830  
C 2.749891 -1.436647 -1.040678  
C 2.566538 -2.793835 -0.743504  
C 3.507862 -3.748156 -1.138684  
C 4.647197 -3.338949 -1.833711  
C 4.855922 -1.990851 -2.142268  
C 3.909390 -1.033085 -1.752809  
O 4.015870 0.288526 -2.013192  
C 5.194697 0.809042 -2.608166  
H 6.086385 0.584437 -1.998477  
H 5.057713 1.897544 -2.655543  
H 5.340366 0.419410 -3.630362  
H 5.752111 -1.694206 -2.687062  
H 5.392104 -4.075451 -2.145406  
H 3.351368 -4.801925 -0.899850  
H 1.680121 -3.105862 -0.193335  
H 1.706399 0.501163 -2.837982  
H 1.036263 1.794508 -1.847312  
H -0.468317 -0.718642 -2.817495  
H -0.789268 0.967061 -3.282264

#10B-02

Geometry with 85 atoms:

Total energy: -3274.530201490  
Cr 0.250468 -0.276939 1.108493  
C 0.278589 1.589778 1.940827  
C -0.988935 1.869657 2.753700  
H -1.216484 0.819884 3.847927  
C -1.678751 -0.539685 3.310767  
C -1.389023 -1.746223 4.202896  
H -1.884061 -1.573680 5.174920  
H -1.878655 -2.636450 3.768120  
C 0.093160 -2.068499 4.450498  
C 0.933781 -2.444914 3.215035

C 1.525628 -1.287756 2.388307  
H 2.019483 -0.564802 3.061512  
H 2.311548 -1.691881 1.722943  
H 1.773870 -3.068562 3.575731  
H 0.341822 -3.128080 2.577028  
H 0.120243 -2.914429 5.157605  
H 0.582266 -1.230871 4.977560  
H -1.257303 -0.768235 2.295716  
H -2.757305 -0.490147 3.084294  
H -1.972786 1.167638 4.571641  
H -0.279857 0.701781 4.416624  
H -1.872590 1.914411 2.089014  
H -0.922338 2.870123 3.222815  
H 1.175716 1.641866 2.581802  
H 0.397567 2.318694 1.127297  
P -1.501425 0.289685 -0.840038  
C -2.602840 -1.148541 -1.158795  
C -2.743090 -1.770520 -2.409690  
C -3.568639 -2.891190 -2.553569  
C -4.273803 -3.395455 -1.456886  
C -4.155697 -2.771653 -0.210168  
C -3.322900 -1.660849 -0.062976  
H -3.231316 -1.186229 0.916999  
H -4.709283 -3.153635 0.651150  
H -4.918654 -4.269694 -1.574285  
H -3.666438 -3.366901 -3.532561  
H -2.217556 -1.388449 -3.286761  
C -2.661711 1.721892 -0.920284  
C -4.050226 1.547697 -1.027086  
C -4.925075 2.637185 -0.984891  
C -4.412752 3.925126 -0.832515  
C -3.033621 4.131235 -0.734087  
C -2.158021 3.038585 -0.783807  
O -0.807483 3.161269 -0.721519  
C -0.218844 4.429662 -0.472639  
H -0.561104 4.850928 0.487599  
H 0.865779 4.264624 -0.421487  
H -0.434672 5.142278 -1.287033  
H -2.647738 5.143937 -0.623001  
H -5.085701 4.785252 -0.793219  
H -6.001348 2.473401 -1.070105  
H -4.462904 0.544795 -1.141837  
C -0.404196 0.379200 -2.355884  
C 0.954878 1.040980 -0.095848  
P 1.833803 0.280009 -0.648000  
C 3.307031 1.304914 -0.339838  
C 4.009794 1.102490 0.861775  
C 5.145629 1.862153 1.145657  
C 5.585128 2.834454 0.240548  
C 4.886812 3.044632 -0.951827  
C 3.751376 2.283257 -1.246042  
H 3.223821 2.460249 -2.185111  
H 5.228084 3.802457 -1.661240  
H 6.472503 3.430745 0.466562  
H 5.686456 1.697792 0.080640  
H 3.666267 0.352062 1.576216  
C 2.422509 -1.328910 -1.289660  
C 3.615817 -1.467229 -2.011340  
C 4.010037 -2.712027 -2.506395  
C 3.200822 -3.826506 -2.277911  
C 2.008321 -3.714172 -1.555322  
C 1.620089 -2.465888 -1.054538  
O 0.466232 -2.274624 -0.324427  
C -0.365961 -3.411326 -0.061714  
H -1.182532 -2.062692 0.577117  
H 0.197178 -4.197114 0.463235  
H -0.791232 -3.805248 -0.997363  
H 1.401564 -4.602773 -1.389333  
H 3.496640 -4.806127 -2.660911  
H 4.943595 -2.810327 -3.064022  
H 4.246402 -0.590174 -2.178212  
H 1.595647 0.945308 -2.985826  
H 0.827837 2.106383 -1.868805  
H -0.248377 -0.664321 -2.671814  
H -0.931319 0.895422 -3.172259

#10B-03

Geometry with 85 atoms:

Total energy: -3274.530670580  
Cr 0.147157 -0.567532 0.997033  
C -0.092575 0.870946 2.432612



C -1.383218 0.624991 3.224790  
C -1.455623 -0.794666 3.803336  
C -1.734088 -1.871790 2.747739  
C -1.303073 -3.298074 3.090972  
H -1.885010 -3.616226 3.974129  
H -1.616767 -3.966969 2.269263  
C 0.187639 -3.527596 3.380647  
C 1.180370 -3.236855 2.242359  
C 1.538875 -1.763268 1.983722  
H 1.792788 -1.269383 2.938626  
H 2.456889 -1.733530 1.370088  
H 2.113497 -3.777104 2.491727  
H 0.824776 -3.722119 1.314191  
H 0.294357 -4.587754 3.666985  
H 0.491202 -2.953670 4.273353  
H -1.301773 -1.614354 1.743782  
H -2.808128 -1.868401 2.499873  
H -2.245916 -0.865293 4.569620  
H -0.506593 -1.006172 4.321239  
H -2.268366 0.810144 2.585637  
H -1.464245 1.355589 4.051894  
H 0.783513 0.831069 3.102963  
H -0.104159 1.854380 1.944244  
P -1.485470 0.619675 -0.755432  
C -2.925687 -0.417527 -1.227429  
C -3.193550 -0.846682 -2.537333  
C -4.271806 -1.700865 -2.794652  
C -5.100208 -2.126997 -1.753074  
C -4.852584 -1.690383 -0.446603  
C -3.771426 -0.846622 -0.186499  
H -3.588196 -0.508694 0.836117  
H -5.501296 -2.010155 0.372627  
H -5.941430 -2.793269 -1.958884  
H -4.467246 -2.028591 -3.818703  
H -2.571303 -0.520873 -3.372234  
C -2.212626 2.297756 -0.520572  
C -3.585992 2.542759 -0.676358  
C -4.134177 3.800190 -0.408451  
C -3.304061 4.834184 0.023957  
C -1.930809 4.623318 0.178182  
C -1.381372 3.364851 -0.098861  
O -0.053861 3.092282 0.002076  
C 0.837569 4.063493 0.533295  
H 0.545069 4.362596 1.553738  
H 1.825754 3.587353 0.570167  
H 0.890146 4.957151 -0.111738  
H -1.294584 5.442848 0.510687  
H -3.720704 5.820468 0.242600  
H -5.206016 3.965123 -0.536711  
H -4.244842 1.738466 -1.006971  
C -0.448330 0.704338 -2.309152  
C 0.983507 1.192110 -2.056837  
P 1.764765 0.298704 -0.621830  
C 3.245951 1.251814 -0.166748  
C 3.681785 1.206437 1.169128  
C 4.801185 1.942326 1.565264  
C 5.487088 2.713751 0.636686  
C 5.054049 2.785182 -0.692585  
C 3.937683 2.048958 -1.097051  
H 3.610223 2.104130 -2.137595  
H 5.587023 3.403518 -1.418943  
H 6.360165 3.309758 0.949451  
H 5.134638 1.902754 2.604881  
H 3.142223 0.601308 1.900178  
C 2.321180 -1.276479 -1.389657  
C 3.578374 -1.444106 -1.983244  
C 3.934255 -2.660170 -2.573298  
C 3.024951 -3.718535 -2.569655  
C 1.766636 -3.579297 -1.973293  
C 1.420692 -2.363223 -1.378918  
O 0.205600 -2.156226 -0.748533  
C -0.826635 -3.142148 -0.889001  
H -1.066288 -3.298004 -1.951871  
H -1.709689 -2.743739 -0.378635  
H -0.532414 -4.094980 -0.424151  
H 1.077909 -4.422974 -1.970430  
H 3.292050 -4.673461 -3.028322  
H 4.918706 -2.778214 -3.030703  
H 4.290955 -0.615975 -1.977656  
H 1.601346 1.025989 -2.952491  
H 0.997934 2.261305 -1.816337

H -0.422533 -0.324374 -2.701699  
H -0.942454 1.336261 -3.062699

#### \*10B-04

Geometry with 85 atoms:  
Total energy: -3274.530512670  
Cr -0.391893 -0.432918 0.918598  
C -0.190960 -2.406812 0.361682  
C 0.868766 -3.142352 1.192919  
C 0.723355 -2.883366 2.696030  
C 1.162589 -1.477226 3.118970  
C 0.642193 -0.997978 4.474584  
H 1.067285 -1.661727 5.248229  
H 1.056252 0.005583 4.681836  
C -0.883422 -0.956859 4.651375  
C -1.670807 -0.035576 3.703919  
C -1.951658 -0.557298 2.283147  
H -2.331499 -1.593546 2.318148  
H -2.762324 0.052570 1.843747  
H -2.642729 0.216341 4.193268  
H -1.172197 0.952551 3.671163  
H -1.074806 -0.631017 5.687781  
H -1.298232 -1.977162 4.584431  
H 0.916305 -0.694500 2.350715  
H 2.263529 -1.422351 3.100381  
H 1.324492 -3.605283 3.275335  
H -0.325393 -3.056824 2.983947  
H 1.879880 -2.845012 0.871856  
H 0.801920 -4.230657 1.005805  
H -1.185949 -2.859284 0.517669  
H -0.045802 -2.487284 -0.714545  
P -1.904959 -0.004672 -0.893738  
C -3.380372 -1.042576 -1.125489  
C -3.298740 -2.216341 -1.896210  
C -4.401017 -3.068759 -1.993492  
C -5.586925 -2.765647 -1.317792  
C -5.668483 -1.606646 -0.539567  
C -4.571494 -0.748598 -0.437714  
H -4.648041 0.152599 0.173528  
H -6.591748 -1.366874 -0.006618  
H -6.447351 -3.434568 -1.395683  
H -4.330506 -3.975294 -2.599239  
H -2.377545 -2.478536 -2.420551  
C -2.457480 1.720937 -0.658974  
C -3.491037 2.290279 -1.418271  
C -3.852012 3.627444 -1.248398  
C -3.167815 4.405609 -0.311652  
C -2.131467 3.864111 0.454203  
C -1.774565 2.520561 0.283615  
O -0.756366 1.926566 0.996307  
C -0.004026 2.723886 1.917533  
H 0.520396 3.536017 1.391957  
H -0.652356 3.132056 2.707768  
H 0.736884 2.057570 2.371366  
H -1.616091 4.497276 1.174616  
H -3.438849 5.454312 -0.167970  
H -4.660443 4.058508 -1.842197  
H -4.023323 1.670954 -2.144791  
C -0.975721 0.037930 -2.498756  
C 0.290337 0.892060 -2.342741  
P 1.375104 0.324204 -0.932575  
C 2.512821 1.748972 -0.666788  
C 3.052804 1.952589 0.614377  
C 3.914333 3.023448 0.862210  
C 4.245666 3.908201 -0.169123  
C 3.716698 3.712589 -1.448398  
C 2.858573 2.637504 -1.698631  
H 2.469096 2.496406 -2.708737  
H 3.977357 4.396731 -2.259693  
H 4.918636 4.747388 0.023452  
H 4.329562 3.166957 1.863046  
H 2.809452 1.258121 1.420258  
C 2.420704 -0.993366 -1.671665  
C 2.243878 -1.509113 -2.962270  
C 3.034705 -2.562502 -3.433271  
C 4.017229 -3.108413 -2.606899  
C 4.216631 -2.612656 -1.314559  
C 3.420463 -1.560363 -0.846380  
O 3.527007 -1.020209 0.394229  
C 4.559658 -1.444506 1.267202  
H 4.495566 -0.807777 2.159599

H 5.554740 -1.312026 0.809475  
H 4.431069 -2.498809 1.567244  
H 4.986205 -3.052398 -0.680426  
H 4.640338 -3.931636 -2.964695  
H 2.882172 -2.949964 -4.442746  
H 1.483502 -1.091764 -3.624310  
H 0.852564 0.922999 -3.288083  
H 0.019439 1.933548 -2.106739  
H -0.726114 -1.001302 -2.763283  
H -1.629236 0.437191 -3.290611

#### \*10B-05

Geometry with 85 atoms:  
Total energy: -3274.530461160  
Cr -0.312663 -0.824034 0.592950  
C -0.112995 -2.492106 -0.617975  
C 1.055547 -3.402543 -0.216389  
C 1.067144 -3.710465 1.283834  
C 1.486458 -2.505961 2.130440  
C 1.091302 -2.538141 3.605582  
H 1.610305 -3.393782 4.072990  
H 1.495056 -1.635659 4.100217  
C -0.409194 -2.647534 3.916377  
H -1.309092 -1.504862 3.414499  
C -1.725729 -1.537889 1.932767  
H -2.044098 -2.553814 1.640855  
H -2.608687 -0.886420 1.798621  
H -2.226596 -1.525795 4.033234  
H -0.831576 -0.538605 3.668494  
H -0.503438 -2.704576 5.014088  
H -0.804475 -3.606293 3.538915  
H 1.136910 -1.536222 1.686608  
H 2.574822 -2.366293 2.038604  
H 1.763857 -4.538798 1.506551  
H 0.067294 -4.063246 1.583568  
H 2.018705 -2.943163 -0.499587  
H 1.001225 -4.352826 -0.780584  
H -1.070576 -3.029471 -0.500957  
H -0.035080 -2.222879 -1.686263  
P -1.924140 0.209710 -0.865402  
C -3.333253 -0.778037 -1.457365  
C -3.243754 -1.460984 -2.683009  
C -4.271134 -2.317620 -3.085602  
C -5.389592 -2.506136 -2.268338  
C -5.477134 -1.839053 -1.042123  
C -4.453605 -0.982383 -0.631704  
H -4.531661 -0.470853 0.329697  
H -6.347385 -1.986591 -0.398164  
H -6.192557 -3.175667 -2.585837  
H -4.194587 -2.841250 -4.041474  
H -2.371608 -1.337048 -3.329249  
C -2.585516 1.585828 0.142397  
C -3.751872 2.289687 -0.191773  
C -4.201819 3.347037 0.601093  
C -3.478140 3.706641 1.740354  
C -2.310193 3.024091 2.094237  
C -1.863976 1.964014 1.297999  
O -0.709141 1.265467 1.574869  
C 0.204993 1.774662 2.553744  
H 0.480782 2.813947 2.321409  
H -0.221814 1.708030 3.565907  
H 1.103127 1.147466 2.491428  
H -1.763136 3.323258 2.987477  
H -3.822346 4.530161 2.370482  
H -5.112463 3.885621 0.331304  
H -4.317521 1.997851 -1.079853  
C -1.102986 1.003769 -2.355276  
C 0.325480 0.489316 -2.599948  
P 1.322854 0.457522 -1.021145  
C 1.867974 2.208340 -0.815975  
C 3.204700 2.603655 -0.992496  
C 3.579301 3.937777 -0.809342  
C 2.627895 4.898414 -0.453439  
C 1.293934 4.517030 -0.281784  
C 0.918983 3.182168 -0.455040  
H -0.123749 2.908323 -0.301332  
H 0.538875 5.257644 -0.006306  
H 2.924932 5.940515 -0.312435  
H 4.623589 4.227779 -0.950609  
H 3.961860 1.872279 -1.280372  
C 2.846352 -0.469480 -1.406123

C 3.137352 -1.043870 -2.649599  
C 4.288523 -1.817862 -2.829154  
C 5.161813 -2.013484 -1.758563  
C 4.899750 -1.443281 -0.507617  
C 3.741682 -0.678140 -0.328325  
O 3.387874 -0.089910 0.845350  
C 4.293807 -0.085225 1.936712  
H 3.810349 0.488100 2.738916  
H 5.244085 0.406414 1.666988  
H 4.502813 -1.104456 2.304690  
H 5.595773 -1.603650 0.315432  
H 6.064684 -2.614482 -1.891119  
H 4.501286 -2.260718 -3.804274  
H 2.466448 -0.890960 -3.496425  
H 0.295648 -0.547679 -2.966600  
H 0.827835 1.103619 -3.362846  
H -1.732786 0.851794 -3.244389  
H -1.098801 2.086037 -2.160587

<sup>4</sup>10B-06

Geometry with 85 atoms:

Total energy: -3274.530443650

Cr -0.316820 -0.810451 0.572247  
C -0.110623 -2.466855 -0.654057  
C 1.034446 -3.397896 -0.231294  
C 0.986012 -3.752943 1.258003  
C 1.390865 -2.587753 2.162978  
C 0.950312 -2.679119 3.621758  
H 1.418937 -3.576547 4.063410  
H 1.369594 -1.817745 4.173280  
C -0.564621 -2.737997 3.870395  
C -1.394512 -1.542810 3.368066  
C -1.772273 -1.523854 1.874584  
H -2.111306 -2.522181 1.547338  
H -2.635066 -0.846265 1.741152  
H -2.329092 -1.532143 3.960578  
H -0.879081 -0.605642 3.656535  
H -0.706641 -2.824737 4.960922  
H -0.982798 -3.667011 3.445924  
H 1.034280 -1.604010 1.762189  
H 2.481166 -2.445923 2.103952  
H 1.660719 -4.598145 1.477790  
H -0.030061 -4.097468 1.508802  
H 2.011705 -2.939425 -0.464028  
H 0.995104 -4.330503 -0.825621  
H -1.077833 -2.993388 -0.573113  
H 0.004008 -2.183451 -1.715252  
P -1.905516 0.247869 -0.890139  
C -3.315488 -0.729220 -1.497518  
C -3.221964 -1.403098 -2.727867  
C -4.247903 -2.256913 -3.140136  
C -5.368963 -2.451826 -2.327980  
C -5.460916 -1.793365 -1.097447  
C -4.439052 -0.939445 -0.677508  
H -4.520082 -0.435715 0.287690  
H -6.333074 -1.946005 -0.457258  
H -6.170399 -3.119751 -2.652648  
H -4.167937 -2.773735 -4.099408  
H -2.347421 -1.274881 -3.369930  
C -2.565436 1.615239 0.131151  
C -3.732133 2.322707 -0.193595  
C -4.185134 3.366188 0.615927  
C -3.464034 3.708304 1.762117  
C -2.295207 3.022299 2.106713  
C -1.846262 1.976358 1.293892  
O -0.691373 1.274060 1.560126  
C 0.204588 1.743147 2.574933  
H 0.491338 2.788165 2.385490  
H -0.244508 1.642986 3.574638  
H 1.100332 1.112788 2.508702  
H -1.750221 3.307886 3.005715  
H -3.811024 4.520337 2.405468  
H -5.096739 3.906999 0.353988  
H -4.296525 2.043673 -1.086559  
C -1.068690 1.052665 -2.364701  
C 0.363280 0.541291 -2.596459  
P 1.344003 0.471340 -1.007540  
C 1.906081 2.211762 -0.759463  
C 0.961972 3.193737 -0.406976  
C 1.351362 4.519658 -0.201109  
C 2.694796 4.884187 -0.330984

C 3.641476 3.915460 -0.677073  
C 3.252724 2.590100 -0.892485  
H 4.006861 1.852401 -1.171980  
H 4.693205 4.192273 -0.785700  
H 3.002604 5.919489 -0.165175  
H 0.599864 5.266774 0.066487  
H -0.088388 2.933337 -0.285843  
C 2.862831 -0.459402 -1.401880  
C 3.173706 -0.979302 -2.664482  
C 4.324949 -1.749455 -2.858490  
C 5.178204 -1.996510 -1.782401  
C 4.895406 -1.482323 -0.511927  
C 3.737221 -0.720783 -0.318537  
O 3.365926 -0.184314 0.874585  
C 4.260255 -0.222334 1.974958  
H 3.765220 0.313475 2.795816  
H 5.210592 0.285131 1.736311  
H 4.470744 -1.255397 2.300662  
H 5.575270 -1.683535 0.315563  
H 6.081449 -2.594402 -1.925970  
H 4.553646 -2.148586 -3.848742  
H 2.519738 -0.783819 -3.515858  
H 0.337324 -0.488656 -2.983124  
H 0.877127 -1.886799 -3.340720  
H -1.687792 0.906111 -3.262193  
H -1.068540 2.133590 -2.162357

<sup>4</sup>10B-07

Geometry with 85 atoms:

Total energy: -3274.528577540

Cr -0.011917 0.063570 0.990549  
C 1.264843 0.621578 2.498424  
C 0.766313 0.164860 3.875058  
C -0.636349 0.676859 4.234512  
C -1.795856 0.248264 3.318169  
C -2.396160 -1.147164 3.530277  
H -2.732965 -1.188356 4.581229  
H -3.315050 -1.217460 2.920568  
C -1.545733 -2.395286 3.247251  
C -1.179782 -2.666781 1.776396  
C 0.062127 -1.971376 1.209073  
H 0.946576 -2.149700 1.843335  
H 0.293347 -2.381605 0.210046  
H -1.015382 -3.757882 1.681234  
H -2.062979 -2.464613 1.143305  
H -2.136988 -3.254435 3.606419  
H -0.632289 -2.392183 3.864956  
H -1.554839 0.399316 2.234205  
H -2.616931 0.975684 3.436842  
H -0.602699 1.780237 4.252666  
H -0.895643 0.371635 5.263434  
H 1.460811 0.508026 4.667086  
H 0.788011 -0.935054 3.931786  
H 2.255633 0.200820 2.277766  
H 1.384745 1.721970 2.467311  
P 1.646142 0.173186 -0.861094  
C 2.906999 1.490692 -0.735160  
C 2.476250 2.765773 -0.328259  
C 3.392325 3.811035 -0.202784  
C 4.747980 3.587960 -0.469033  
C 5.181113 2.319636 -0.866157  
C 4.266298 1.270860 -1.001506  
H 4.615873 0.285179 -1.315855  
H 6.239261 2.142862 -1.074241  
H 5.467359 4.403860 -0.364514  
H 3.049727 4.800479 0.110387  
H 1.420447 2.939469 -0.106041  
C 2.506322 -1.375713 -1.314593  
C 2.435539 -1.943991 -2.595424  
C 3.052301 -3.165442 -2.878638  
C 3.752359 -3.803654 -1.870595  
C 3.853017 -3.281651 -0.589805  
C 3.238622 -2.052855 -0.307950  
O 3.308676 -1.429464 0.885810  
C 3.932321 -2.066430 1.990509  
H 3.451842 -3.032175 2.221764  
H 5.009527 -2.223313 1.809607  
H 3.809044 -1.389869 2.845886  
H 4.414310 -3.808474 0.181154  
H 4.236175 -4.788091 -2.079205  
H 2.985571 -3.590534 -3.882060

H 1.897501 -1.434540 -3.395775  
C 0.654517 0.631121 -2.371671  
C -0.612086 -0.225350 -2.509727  
P -1.650784 -0.059607 -0.974592  
C -3.041513 -1.232128 -1.137708  
C -4.241777 -0.961740 -0.453998  
C -5.274887 -1.900242 -0.445268  
C -5.122305 -3.121301 -1.111556  
C -3.931927 -3.397483 -1.789078  
C -2.893356 -2.461414 -1.801729  
H -1.969229 -2.707157 -2.328687  
H -3.806102 -4.348668 -2.312014  
H -5.931227 -3.855767 -1.102482  
H -6.203917 -1.676620 0.084937  
H -4.373330 -0.011336 0.070071  
C -2.386713 1.605886 -1.175404  
C -3.333288 1.866409 -2.179620  
C -3.879217 3.138378 -2.346390  
C -3.471779 4.169133 -1.496576  
C -2.530733 3.938123 -0.490254  
C -1.981341 2.657634 -0.326573  
O -1.039460 2.378928 0.645556  
C -0.782583 3.393304 1.625979  
H -1.705975 3.652267 2.167729  
H -0.356886 4.295602 1.160760  
H -0.053859 2.975735 2.324588  
H -2.234046 4.763503 0.154166  
H -3.889136 5.172463 -1.610789  
H -4.617058 3.322596 -3.129868  
H -3.656186 1.050164 -2.831059  
H -1.199205 0.073636 -3.392576  
H -0.353303 -1.288337 -2.627331  
H 0.396375 1.694486 -2.237894  
H 1.283815 0.578043 -3.273178

<sup>4</sup>10B-08

Geometry with 85 atoms:

Total energy: -3274.530291920

Cr 0.241641 -0.350657 1.079480  
C 0.279005 1.444389 2.054227  
C -0.988989 1.676515 2.880595  
C -1.214270 0.564740 3.911902  
C -1.668831 -0.759256 3.289522  
C -1.367852 -2.020967 4.095933  
H -1.848184 -1.914087 5.084658  
H -1.863144 -2.881048 3.610071  
C 0.118639 -2.355384 4.295650  
C 0.932872 -2.651129 3.020859  
C 1.534121 -1.446466 2.271622  
H 2.044357 -0.779666 2.989317  
H 2.310399 -1.814543 1.875349  
H 1.766099 -3.316439 3.316979  
H 0.316253 -3.272057 2.343227  
H 0.159630 -3.244544 4.946800  
H 0.617367 -1.552110 4.865196  
H -1.239245 -0.911502 2.263788  
H -2.747310 -0.703737 3.065124  
H -1.972535 0.865859 4.654159  
H -0.277086 0.415515 4.472454  
H -1.873701 1.757882 2.220551  
H -0.923921 2.648615 3.406111  
H 1.173001 1.444991 2.701448  
H 0.407289 2.226846 1.294004  
P -1.507185 0.345276 -0.830625  
C -2.683277 -1.024200 -1.175609  
C -2.836770 -1.634352 -2.430418  
C -3.711128 -2.715379 -2.588537  
C -4.450627 -3.191080 -1.502056  
C -4.319489 -2.577196 -0.251369  
C -3.439420 -1.505610 -0.089769  
H -3.339987 -1.035590 0.891517  
H -4.900711 -2.936452 0.601444  
H -5.133117 -4.034688 -1.630312  
H -3.819274 -3.182352 -3.570681  
H -2.282756 -1.274372 -3.299210  
C -2.588461 1.840409 -0.861955  
C -3.982170 1.746632 -0.998333  
C -4.798312 2.878902 -0.922024  
C -4.220984 4.129267 -0.703712  
C -2.834840 4.256001 -0.573984  
C -2.017758 3.120870 -0.659521

|   |           |           |            |
|---|-----------|-----------|------------|
| O | -0.663538 | 3.168799  | -0.572779  |
| C | -0.014212 | 4.391899  | -0.256228  |
| H | -0.350142 | 4.785533  | 0.717867   |
| H | 1.059288  | 4.167955  | -0.197458  |
| H | -0.179718 | 5.151734  | -1.039114  |
| H | -2.398266 | 5.240902  | -0.411183  |
| H | -4.847484 | 5.022085  | -0.636443  |
| H | -5.880003 | 2.777624  | -1.032134  |
| H | -4.445590 | 0.773224  | -1.163366  |
| C | -0.420868 | 0.423361  | -2.354187  |
| C | 0.950503  | 1.061830  | -2.099004  |
| P | 1.818630  | 0.277509  | -0.656809  |
| C | 3.280738  | 1.302826  | -0.304905  |
| C | 3.945800  | 1.103050  | 0.918395   |
| C | 5.068056  | 1.868519  | 1.238593   |
| C | 5.530291  | 2.844065  | 0.348503   |
| C | 4.869482  | 3.051196  | -0.865803  |
| C | 3.748274  | 2.283702  | -1.196494  |
| H | 3.249060  | 2.456876  | -2.151657  |
| H | 5.229138  | 3.811517  | -1.563349  |
| H | 6.406407  | 3.445441  | 0.603227   |
| H | 5.579815  | 1.706648  | 2.190241   |
| H | 3.582249  | 0.351134  | 1.621180   |
| C | 2.415725  | -1.317665 | -1.324873  |
| C | 3.636968  | -1.448371 | -1.999084  |
| C | 4.038340  | -2.682148 | -2.515991  |
| C | 3.207619  | -3.792607 | -2.358004  |
| C | 1.987053  | -3.688151 | -1.681963  |
| C | 1.592119  | -2.452248 | -1.157313  |
| O | 0.412902  | -2.271147 | -0.463369  |
| C | -0.460844 | -3.396230 | -0.305055  |
| H | -0.837228 | -3.734226 | -1.282515  |
| H | -1.306972 | -3.055406 | 0.299192   |
| H | 0.049982  | -4.221574 | 0.212894   |
| H | 1.365343  | -4.574830 | -1.569450  |
| H | 3.508128  | -4.763299 | -2.759562  |
| H | 4.993703  | -2.774409 | -3.036511  |
| H | 4.283359  | -0.574274 | -2.112208  |
| H | 1.587475  | 0.957954  | -2.991370  |
| H | 0.843362  | 2.127929  | -1.866249  |
| H | -0.284914 | -0.621634 | -2.673464  |
| H | -0.945390 | 0.950962  | -3.165041  |
| H | -5.212468 | -0.593003 | -4.198318  |
| H | -2.854117 | -0.281778 | -3.545609  |
| C | -1.451137 | 2.236768  | -0.345415  |
| C | -1.925990 | 3.307104  | -1.120323  |
| C | -1.821675 | 4.623233  | -0.673045  |
| C | -1.243825 | 4.871883  | 0.574661   |
| C | -0.767406 | 3.825026  | 1.367380   |
| C | -0.861761 | 2.502061  | 0.910068   |
| O | -0.386063 | 1.432630  | 1.642945   |
| C | 0.245092  | 1.715671  | 2.903824   |
| H | 1.090273  | 2.404874  | 2.768704   |
| H | -0.485690 | 2.135200  | 3.612886   |
| H | 0.623979  | 0.765622  | 3.283700   |
| H | -0.322756 | 4.054930  | 2.333310   |
| H | -1.161684 | 5.896038  | 0.946605   |
| H | -2.195381 | 5.445871  | -1.286181  |
| H | -2.397554 | 3.097281  | -2.084162  |
| C | -0.501511 | 0.373660  | -2.397130  |
| C | 0.956371  | 0.676568  | -2.030270  |
| P | 1.543792  | -1.944005 | -0.477586  |
| C | 2.572108  | 1.019547  | 0.446978   |
| C | 3.482274  | 0.513631  | 1.391552   |
| C | 4.238875  | 1.381988  | 2.181796   |
| C | 4.096023  | 2.766699  | 2.041110   |
| C | 3.192444  | 3.275616  | 1.104062   |
| C | 2.431767  | 2.408827  | 0.313118   |
| H | 1.726593  | 2.838712  | -0.398549  |
| H | 3.072993  | 4.355363  | 0.984443   |
| H | 4.689789  | 3.445853  | 2.657735   |
| H | 4.945260  | 0.973580  | 2.908658   |
| H | 3.610198  | -0.565315 | 1.506187   |
| C | 2.739830  | -1.466891 | -1.009010  |
| C | 2.596168  | -2.803768 | -0.613649  |
| C | 3.546493  | -0.764382 | -0.970289  |
| C | 4.656137  | -3.381797 | -1.725611  |
| C | 4.828338  | -2.053381 | -2.127570  |
| C | 3.874294  | -1.089418 | -1.773939  |
| O | 3.955483  | 0.216649  | -2.112012  |
| C | 5.118079  | 0.720205  | -2.751829  |
| H | 4.965939  | 1.802960  | -2.853879  |
| H | 5.254605  | 0.279353  | -3.754319  |
| H | 6.021729  | 0.539479  | -2.145018  |
| H | 5.704245  | -1.776452 | -2.714054  |
| H | 5.407482  | -4.123118 | -2.009088  |
| H | 3.420530  | -4.801655 | -0.653938  |
| H | 1.736176  | -3.095774 | -0.012818  |
| H | 1.632898  | 0.402090  | -2.849780  |
| H | 1.083528  | 1.755685  | -1.870635  |
| H | -0.609280 | -0.658342 | -2.768873  |
| H | -0.840463 | 1.052738  | -3.195237  |
| H | -5.212468 | -0.593003 | -4.198318  |
| H | -2.854117 | -0.281778 | -3.545609  |
| C | -1.451137 | 2.236768  | -0.345415  |
| C | -1.925990 | 3.307104  | -1.120323  |
| C | -1.821675 | 4.623233  | -0.673045  |
| C | -1.243825 | 4.871883  | 0.574661   |
| C | -0.767406 | 3.825026  | 1.367380   |
| C | -0.861761 | 2.502061  | 0.910068   |
| O | -0.386063 | 1.432630  | 1.642945   |
| C | 0.245092  | 1.715671  | 2.903824   |
| H | 1.090273  | 2.404874  | 2.768704   |
| H | -0.485690 | 2.135200  | 3.612886   |
| H | 0.623979  | 0.765622  | 3.283700   |
| H | -0.322756 | 4.054930  | 2.333310   |
| H | -1.161684 | 5.896038  | 0.946605   |
| H | -2.195381 | 5.445871  | -1.286181  |
| H | -2.397554 | 3.097281  | -2.084162  |
| C | -0.501511 | 0.373660  | -2.397130  |
| C | 0.956371  | 0.676568  | -2.030270  |
| P | 1.543792  | -1.944005 | -0.477586  |
| C | 2.572108  | 1.019547  | 0.446978   |
| C | 3.482274  | 0.513631  | 1.391552   |
| C | 4.238875  | 1.381988  | 2.181796   |
| C | 4.096023  | 2.766699  | 2.041110   |
| C | 3.192444  | 3.275616  | 1.104062   |
| C | 2.431767  | 2.408827  | 0.313118   |
| H | 1.726593  | 2.838712  | -0.398549  |
| H | 3.072993  | 4.355363  | 0.984443   |
| H | 4.689789  | 3.445853  | 2.657735   |
| H | 4.945260  | 0.973580  | 2.908658   |
| H | 3.610198  | -0.565315 | 1.506187   |
| C | 2.739830  | -1.466891 | -1.009010  |
| C | 2.596168  | -2.803768 | -0.613649  |
| C | 3.546493  | -0.764382 | -0.970289  |
| C | 4.656137  | -3.381797 | -1.725611  |
| C | 4.828338  | -2.053381 | -2.127570  |
| C | 3.874294  | -1.089418 | -1.773939  |
| O | 3.955483  | 0.216649  | -2.112012  |
| C | 5.118079  | 0.720205  | -2.751829  |
| H | 4.965939  | 1.802960  | -2.853879  |
| H | 5.254605  | 0.279353  | -3.754319  |
| H | 6.021729  | 0.539479  | -2.145018  |
| H | 5.704245  | -1.776452 | -2.714054  |
| H | 5.407482  | -4.123118 | -2.009088  |
| H | 3.420530  | -4.801655 | -0.653938  |
| H | 1.736176  | -3.095774 | -0.012818  |
| H | 1.632898  | 0.402090  | -2.849780  |
| H | 1.083528  | 1.755685  | -1.870635  |
| H | -0.609280 | -0.658342 | -2.768873  |
| H | -0.840463 | 1.052738  | -3.195237  |
| C | 2.563600  | 3.017105  | -1.423939  |
| C | 3.331794  | 4.125710  | -1.056713  |
| C | 3.831855  | 4.236132  | 0.244331   |
| C | 3.562481  | 3.231929  | 1.179833   |
| C | 2.790008  | 2.126569  | 0.815447   |
| H | 2.588627  | 1.341439  | 1.545276   |
| H | 3.955371  | 3.310046  | 2.196843   |
| H | 4.433917  | 5.102949  | 0.527936   |
| H | 3.543938  | 4.904705  | -1.793194  |
| H | 2.193286  | 2.946349  | -2.448885  |
| C | 2.379535  | -0.606749 | -1.790316  |
| C | 2.211636  | -1.008732 | -3.121254  |
| C | 3.075931  | -1.940502 | -3.706082  |
| C | 4.121795  | -2.475923 | -2.953653  |
| C | 4.306577  | -2.098909 | -1.619240  |
| C | 3.431390  | -1.176137 | -1.034558  |
| O | 3.501130  | -0.774268 | 0.261192   |
| C | 4.605420  | -1.152552 | 1.065533   |
| H | 5.557262  | -0.812134 | 0.623626   |
| H | 4.467151  | -0.657920 | 2.036118   |
| H | 4.643248  | -2.243722 | 1.222007   |
| H | 5.124237  | -2.532249 | -1.043509  |
| H | 4.805846  | -3.200158 | -3.402590  |
| H | 2.931677  | -2.240737 | -4.746043  |
| H | 1.399916  | -0.595516 | -3.722767  |
| C | 0.102059  | 1.187052  | -2.226595  |
| C | -1.148881 | 0.315630  | -2.397499  |
| P | -1.990826 | 0.106193  | -0.757436  |
| C | -3.535974 | -0.808185 | -1.039133  |
| C | -3.634061 | -1.756165 | -2.072100  |
| C | -4.795935 | -2.520715 | -2.211158  |
| C | -5.861009 | -2.350454 | -1.322225  |
| C | -5.764325 | -1.412583 | -0.288455  |
| C | -4.606892 | -0.646471 | -0.141384  |
| H | -4.538105 | 0.080297  | 0.671121   |
| H | -6.593528 | -1.278243 | 0.410242   |
| H | -6.767874 | -2.949609 | -1.1233879 |
| H | -4.866820 | -3.252871 | -3.019127  |
| H | -2.810947 | -1.907196 | -2.773334  |
| C | -2.444688 | 1.800080  | -0.250765  |
| C | -3.452135 | 2.526217  | -0.904226  |
| C | -3.761219 | 3.830090  | -0.516762  |
| C | -3.054138 | 4.414951  | 0.536957   |
| C | -2.046622 | 3.713257  | 1.204622   |
| C | -1.737556 | 2.404576  | 0.811568   |
| O | -0.748514 | 1.661754  | 1.416508   |
| C | -0.112609 | 2.178535  | 2.589769   |
| H | 0.601072  | 1.414597  | 2.917753   |
| H | -0.850888 | 2.352561  | 3.388503   |
| H | 0.437862  | 3.104102  | 2.364989   |
| H | -1.513447 | 4.196195  | 2.022073   |
| H | -3.286224 | 5.435093  | 0.852035   |
| H | -4.549954 | 4.383875  | -1.029894  |
| H | -4.008039 | 2.053934  | -1.718320  |
| H | -1.849112 | 0.761592  | -3.121724  |
| H | -0.888360 | -0.692780 | -2.756725  |
| H | -0.185220 | 2.197344  | -1.894523  |
| H | 0.625199  | 1.308370  | -3.186723  |
| C | 2.563600  | 3.017105  | -1.423939  |
| C | 3.331794  | 4.125710  | -1.056713  |
| C | 3.831855  | 4.236132  | 0.244331   |
| C | 3.562481  | 3.231929  | 1.179833   |
| C | 2.790008  | 2.126569  | 0.815447   |
| H | 2.588627  | 1.341439  | 1.545276   |
| H | 3.955371  | 3.310046  | 2.196843   |
| H | 4.433917  | 5.102949  | 0.527936   |
| H | 3.543938  | 4.904705  | -1.793194  |
| H | 2.193286  | 2.946349  | -2.448885  |
| C | 2.379535  | -0.606749 | -1.790316  |
| C | 2.211636  | -1.008732 | -3.121254  |
| C | 3.075931  | -1.940502 | -3.706082  |
| C | 4.121795  | -2.475923 | -2.953653  |
| C | 4.306577  | -2.098909 | -1.619240  |
| C | 3.431390  | -1.176137 | -1.034558  |
| O | 3.501130  | -0.774268 | 0.261192   |
| C | 4.605420  | -1.152552 | 1.065533   |
| H | 5.557262  | -0.812134 | 0.623626   |
| H | 4.467151  | -0.657920 | 2.036118   |
| H | 4.643248  | -2.243722 | 1.222007   |
| H | 5.124237  | -2.532249 | -1.043509  |
| H | 4.805846  | -3.200158 | -3.402590  |
| H | 2.931677  | -2.240737 | -4.746043  |
| H | 1.399916  | -0.595516 | -3.722767  |
| C | 0.102059  | 1.187052  | -2.226595  |
| C | -1.148881 | 0.315630  | -2.397499  |
| P | -1.990826 | 0.106193  | -0.757436  |
| C | -3.535974 | -0.808185 | -1.039133  |
| C | -3.634061 | -1.756165 | -2.072100  |
| C | -4.795935 | -2.520715 | -2.211158  |
| C | -5.861009 | -2.350454 | -1.322225  |
| C | -5.764325 | -1.412583 | -0.288455  |
| C | -4.606892 | -0.646471 | -0.141384  |
| H | -4.538105 | 0.080297  | 0.671121   |
| H | -6.593528 | -1.278243 | 0.410242   |
| H | -6.767874 | -2.949609 | -1.1233879 |
| H | -4.866820 | -3.252871 | -3.019127  |
| H | -2.810947 | -1.907196 | -2.773334  |
| C | -2.444688 | 1.800080  | -0.250765  |
| C | -3.452135 | 2.526217  | -0.904226  |
| C | -3.761219 | 3.830090  | -0.516762  |
| C | -3.054138 | 4.414951  | 0.536957   |
| C | -2.046622 | 3.713257  | 1.204622   |
| C | -1.737556 | 2.404576  | 0.811568   |
| O | -0.748514 | 1.661754  | 1.416508   |
| C | -0.112609 | 2.178535  | 2.589769   |
| H | 0.601072  | 1.414597  | 2.917753   |
| H | -0.850888 | 2.352561  | 3.388503   |
| H | 0.437862  | 3.104102  | 2.364989   |
| H | -1.513447 | 4.196195  | 2.022073   |
| H | -3.286224 | 5.435093  | 0.852035</ |

|   |           |           |           |   |           |           |           |   |           |           |           |
|---|-----------|-----------|-----------|---|-----------|-----------|-----------|---|-----------|-----------|-----------|
| H | -2.192199 | 0.736608  | 4.534190  | H | -0.375874 | -2.551939 | 0.820729  | C | -0.807685 | -2.964710 | 3.051856  |
| H | -0.448583 | 0.616831  | 4.300209  | H | -1.113475 | -2.100657 | 2.381182  | C | -1.898229 | -1.932246 | 2.738050  |
| H | -2.342533 | 1.546343  | 2.069638  | H | 1.922641  | -2.131111 | 1.740436  | C | -2.328172 | -1.034074 | 3.920152  |
| H | -1.586712 | 2.657529  | 3.210899  | H | 1.078913  | -3.304597 | 2.743738  | H | -3.400346 | -1.201544 | 4.113595  |
| H | 0.694886  | 2.016197  | 2.434951  | H | 0.370324  | -1.429039 | 4.293835  | H | -1.808009 | -1.370542 | 4.832998  |
| H | -0.292762 | 2.406087  | 0.996492  | H | 2.096633  | -1.759035 | 4.289065  | C | -2.104445 | 0.479333  | 3.765590  |
| P | -1.505184 | -0.155386 | -0.882310 | H | 1.201845  | 0.576858  | 5.430701  | C | -0.637493 | 0.957277  | 3.700201  |
| C | -1.670214 | -1.934246 | -1.315129 | H | 1.910500  | 1.914905  | 4.537004  | C | -0.038239 | 1.111331  | 2.301373  |
| C | -2.126532 | -2.799776 | -0.300461 | H | -0.433338 | 2.315223  | 5.208734  | H | -0.628004 | 1.845345  | 1.729618  |
| C | -2.257069 | -4.169940 | -0.537847 | H | -0.160063 | 2.519560  | 3.490134  | H | 0.995917  | 1.492848  | 2.359487  |
| C | -1.908690 | -4.699169 | -1.785721 | H | -1.249286 | -0.167136 | 4.429736  | H | -0.591779 | 1.950402  | 4.187466  |
| C | -1.441750 | -3.850609 | -2.793652 | H | -2.301952 | 1.226534  | 4.487649  | H | -0.008781 | 0.306617  | 4.330689  |
| C | -1.329233 | -2.475091 | -2.564910 | H | -2.109802 | 1.638138  | 2.078589  | H | -2.593491 | 0.963408  | 4.626950  |
| H | -0.976641 | -1.833467 | -3.374761 | H | -2.614921 | -0.039495 | 2.377744  | H | -2.648355 | 0.848837  | 2.875098  |
| H | -1.170426 | -4.258959 | -3.770329 | P | -1.820674 | -0.304402 | -0.720081 | H | -2.774383 | -2.451497 | 2.318372  |
| H | -2.001922 | -5.771756 | -1.972062 | C | -3.365906 | -1.252578 | -0.563497 | H | -1.613409 | -1.269523 | 1.878450  |
| H | -2.625341 | -4.825956 | 0.254607  | C | -3.496008 | -2.544853 | -1.100085 | H | -1.174527 | -3.584685 | 3.888589  |
| H | -2.398647 | -2.397244 | 0.679287  | C | -4.671063 | -3.273607 | -0.893510 | H | -0.696953 | -3.651352 | 2.194259  |
| C | -3.216966 | 0.503763  | -0.935583 | C | -5.719837 | -2.722703 | -0.152407 | H | 0.443211  | -1.659640 | 4.235187  |
| C | -4.338350 | -0.298416 | -1.189499 | C | -5.594270 | -1.436648 | 0.384802  | H | 1.196377  | -3.183495 | 3.807008  |
| C | -5.629538 | 0.235929  | -1.146924 | C | -4.423575 | -0.703796 | 0.185387  | H | 1.652647  | -2.468343 | 1.526126  |
| C | -5.805431 | 1.587114  | -0.846222 | H | -4.335855 | 0.300094  | 0.606736  | H | 2.162803  | -1.144420 | 2.587518  |
| C | -4.703849 | 2.412238  | -0.597828 | H | -6.412273 | -1.001396 | 0.963712  | P | -1.406583 | 0.470982  | -0.930587 |
| C | -3.409783 | 1.877465  | -0.645862 | H | -6.637120 | -3.294742 | 0.006422  | C | -2.890330 | -0.542418 | -1.300065 |
| O | -2.281168 | 2.602330  | -0.440471 | H | -4.766043 | -4.276160 | -1.317589 | C | -3.165286 | -1.107595 | -2.555634 |
| C | -2.369329 | 3.973323  | -0.082225 | H | -2.690867 | -2.993287 | -1.684907 | C | -4.283814 | -1.930288 | -2.729013 |
| H | -2.922462 | 4.109588  | 0.862254  | C | -2.273254 | 1.379158  | -1.272118 | C | -5.143073 | -2.188997 | -1.657533 |
| H | -1.338222 | 4.325211  | 0.052561  | C | -3.318496 | 1.615422  | -2.177540 | C | -4.886598 | -1.616104 | -0.406455 |
| H | -2.850024 | 4.566799  | -0.878713 | C | -3.613156 | 2.909311  | -2.609067 | C | -3.765528 | -0.803624 | -0.227969 |
| H | -4.861121 | 3.466471  | -0.371183 | C | -2.849981 | 3.978670  | -2.134594 | H | -3.572694 | -0.361804 | 0.753237  |
| H | -6.810431 | 2.014349  | -0.806279 | C | -1.803598 | 3.770012  | -1.231519 | H | -5.558904 | -1.806394 | 0.433719  |
| H | -6.491023 | -0.403832 | -1.349256 | C | -1.514579 | 2.470494  | -0.795906 | H | -6.015303 | -2.832086 | -1.797265 |
| H | -4.205818 | -1.356478 | -1.422304 | O | -0.498150 | 2.193013  | 0.091189  | H | -4.486091 | -2.366649 | -3.710336 |
| C | -0.646854 | 0.659780  | -2.317055 | C | 0.189898  | 3.287816  | 0.708175  | H | -2.515770 | -0.912486 | -3.410651 |
| C | 0.850630  | 0.341220  | -2.346825 | H | 0.900657  | 2.850520  | 1.415471  | C | -2.032735 | 2.201113  | -0.942541 |
| P | 1.696539  | 0.631835  | -0.716087 | H | 0.750929  | 3.866733  | -0.039661 | C | -3.362562 | 2.512778  | -1.265272 |
| C | 2.158799  | 2.390641  | -0.613336 | H | -0.516653 | 3.934281  | 1.250982  | C | -3.834727 | 3.826220  | -2.196457 |
| C | 1.747341  | 3.342518  | -1.559402 | H | -1.226012 | 4.622857  | -0.878434 | C | -2.971770 | 4.846928  | -0.795927 |
| C | 2.053502  | 4.694675  | -1.371011 | H | -3.068306 | 4.996948  | -2.465163 | C | -1.640659 | 4.567001  | -0.473671 |
| C | 2.772374  | 5.103348  | -0.244417 | H | -4.433032 | 3.081170  | -3.309352 | C | -1.165331 | 3.250999  | -0.553525 |
| C | 3.183543  | 4.157872  | 0.702449  | H | -3.916237 | 0.773986  | -2.536884 | O | 0.120380  | 2.902097  | -0.282764 |
| C | 2.870288  | 2.809979  | 0.526471  | C | -0.885155 | -1.012815 | -2.155576 | C | 0.996174  | 3.843046  | 0.322888  |
| H | 3.179549  | 2.079037  | 1.278105  | C | 0.427325  | -0.250971 | -2.382186 | H | 0.576695  | 4.229388  | 1.266504  |
| H | 3.743246  | 4.473197  | 1.586291  | P | 1.491279  | -0.153835 | -0.839177 | H | 1.928473  | 3.307404  | 0.536830  |
| H | 3.011988  | 6.159907  | -0.101730 | C | 2.390064  | 1.448981  | -0.953686 | H | 1.215280  | 4.684295  | -0.356530 |
| H | 1.730241  | 5.429794  | -2.112011 | C | 2.334075  | 2.323846  | -2.049439 | H | -0.979354 | 5.377204  | -0.167296 |
| H | 1.184218  | 3.044538  | -2.445783 | C | 2.997646  | 3.555536  | -2.006690 | H | -3.330468 | 5.877204  | -0.732563 |
| C | 3.228816  | -0.344153 | -0.853505 | C | 3.737170  | 3.922468  | -0.879019 | H | -4.873636 | 4.045696  | -1.451416 |
| C | 4.505076  | 0.193701  | -1.052665 | C | 3.813338  | 3.050238  | 0.212540  | H | -4.045382 | 1.717026  | -1.568066 |
| C | 5.622767  | -0.644185 | -1.117558 | C | 3.138748  | 1.829084  | 0.177047  | C | -0.317199 | 0.308241  | -2.437462 |
| C | 5.458318  | -2.024004 | -0.983124 | H | 3.197831  | 1.159479  | 1.039541  | C | -1.119758 | 0.780081  | -2.179619 |
| C | 4.190272  | -2.583448 | -0.785569 | H | 4.393837  | 3.324948  | 1.096778  | P | 1.827817  | 0.061307  | -0.608631 |
| C | 3.073629  | -1.743682 | -0.719359 | H | 4.257166  | 4.883089  | -0.851929 | C | 3.303992  | 1.055303  | -0.220343 |
| O | 1.792992  | -2.175177 | -0.531018 | H | 2.941464  | 4.227538  | -2.866719 | C | 3.738344  | 1.111981  | 1.115396  |
| C | 1.529349  | -3.571258 | -0.436596 | H | 1.777700  | 2.060455  | -2.950415 | C | 4.855694  | 1.876842  | 1.458600  |
| H | 1.822135  | -4.092238 | -1.363043 | C | 2.833882  | -1.396960 | -1.077753 | C | 5.543752  | 2.594489  | 0.474879  |
| H | 0.447860  | -3.672305 | -0.296362 | C | 4.184386  | -1.038577 | -1.205332 | C | 5.115831  | 2.542741  | -0.855820 |
| H | 2.053412  | -4.019869 | 0.422689  | C | 5.186157  | -2.008166 | -1.308475 | C | 4.001194  | 1.776417  | -1.206170 |
| H | 4.086964  | -3.663186 | -0.682356 | C | 4.841263  | -3.359117 | -1.285944 | H | 3.684671  | 1.745341  | -2.250501 |
| H | 6.327155  | -2.685119 | -1.030491 | C | 3.502765  | -3.746750 | -1.172889 | H | 5.652707  | 3.100334  | -1.627116 |
| H | 6.616191  | -0.218218 | -1.272146 | C | 2.500237  | -2.772867 | -1.074514 | H | 6.415080  | 3.196038  | 0.745218  |
| H | 4.627306  | 1.274125  | -1.154146 | O | 1.177165  | -3.065820 | -0.985806 | H | 5.185926  | 1.916176  | 2.499522  |
| H | 1.020649  | -0.727165 | -2.545293 | C | 0.759498  | -4.415789 | -0.853314 | H | 3.196901  | 0.563548  | 1.888175  |
| H | 1.373894  | 0.901232  | -3.137530 | H | 1.201090  | -4.889038 | 0.039690  | C | 2.423524  | -1.589695 | -1.144704 |
| H | -1.137163 | 0.380012  | -3.262535 | H | 1.014623  | -5.008434 | -1.748531 | C | 3.739284  | -1.850220 | -1.544934 |
| H | -0.822036 | 1.734915  | -2.166911 | H | -0.332340 | -4.395534 | -0.737804 | C | 4.118337  | -3.131857 | -1.955826 |
|   |           |           |           | H | 3.249536  | -4.806441 | -1.165989 | C | 3.174417  | -4.159384 | -1.965027 |
|   |           |           |           | H | 5.615065  | -4.127035 | -1.361527 | C | 1.854742  | -3.924786 | -1.560886 |
|   |           |           |           | H | 6.229952  | -1.702542 | -1.406360 | C | 1.484112  | -2.642524 | -1.147459 |
|   |           |           |           | H | 4.467042  | 0.014423  | -1.224404 | O | 0.216326  | -2.322016 | -0.712292 |
|   |           |           |           | H | 1.004271  | -0.708757 | -3.199026 | C | -0.804296 | -3.323750 | -0.749482 |
|   |           |           |           | H | 0.199247  | 0.783203  | -2.681045 | H | -0.541699 | -4.180583 | -0.109708 |
|   |           |           |           | H | -0.677373 | -2.065378 | -1.924325 | H | -0.975854 | -3.665413 | -1.782247 |
|   |           |           |           | H | -1.521956 | -0.970306 | -3.053695 | H | -1.719171 | -2.850668 | -0.375875 |
|   |           |           |           |   |           |           |           | H | 1.138107  | -4.745273 | -1.564586 |
|   |           |           |           |   |           |           |           | H | 3.460651  | -5.164721 | -2.283086 |
|   |           |           |           |   |           |           |           | H | 5.148185  | -3.324080 | -2.263546 |
|   |           |           |           |   |           |           |           | H | 4.477091  | -1.044904 | -1.529305 |
|   |           |           |           |   |           |           |           | H | 1.769183  | 0.490021  | -3.019637 |
|   |           |           |           |   |           |           |           | H | 1.161435  | 1.871008  | -2.069920 |
|   |           |           |           |   |           |           |           | H | -0.320195 | -0.761671 | -2.694704 |

\*10B-12  
 Geometry with 85 atoms:  
 Total energy: -3274.525426680  
 Cr -0.320927 0.028980 1.142258  
 C -1.768801 0.662510 2.478969  
 C -1.413785 0.820551 3.967436  
 C -0.221343 1.753254 4.284170  
 C 1.165688 1.104973 4.461936  
 C 1.592872 0.110358 3.370102  
 H 1.150571 0.462112 2.400500  
 H 2.669536 0.205484 3.153606  
 C 1.274200 -1.365226 3.668317  
 C 1.065140 -2.242794 2.430034  
 C -0.251139 -1.924462 1.714918

\*10B-13  
 Geometry with 85 atoms:  
 Total energy: -3274.527040970  
 Cr 0.073643 -0.500473 1.044365  
 C 1.278324 -1.694581 2.223112  
 C 0.561746 -2.371994 3.402543

H -0.754701 0.860368 -3.283111

**#10B-14**

Geometry with 85 atoms:  
Total energy: -3274.526712090  
Cr 0.193943 -0.374524 1.142918  
C 1.490348 -1.398547 2.398855  
C 0.703759 -2.322754 3.347804  
C -0.326944 -1.568576 4.195690  
C -1.550138 -1.096770 3.398509  
C -2.276244 0.161656 3.919390  
H -3.247820 -0.131862 4.348228  
H -1.699586 0.603743 4.749541  
C -2.500313 1.232411 2.839941  
C -1.261729 2.073086 2.471014  
C 0.074515 1.350896 2.253177  
H 0.814333 2.043038 1.817685  
H 0.489639 1.020224 3.220797  
H -1.519506 2.662546 1.579828  
H -1.115270 2.237458 3.281572  
H -3.291677 1.924316 3.172574  
H -2.905919 0.748209 1.933815  
H -2.256910 -1.935494 3.279887  
H -1.290142 -0.900551 2.325512  
H 0.167821 -0.698121 4.658763  
H -0.679623 -2.196695 5.031139  
H 1.404113 -2.852669 4.021091  
H 0.190326 -3.122421 2.780521  
H 2.202904 -1.987869 1.796419  
H 2.082559 -0.681902 2.994524  
P 1.851412 0.078314 -0.596347  
C 3.271029 1.187746 -0.341392  
C 3.728660 1.382186 0.973870  
C 4.804357 2.237575 1.222632  
C 5.425980 2.908643 0.164613  
C 4.972817 2.721559 -1.145468  
C 3.899261 1.864561 -1.402247  
H 3.559806 1.731067 -2.431512  
H 5.457727 3.244649 -1.973258  
H 6.264673 3.580997 0.361213  
H 5.153942 2.383819 2.247343  
H 3.238483 0.868444 1.802956  
C 2.508146 -1.587432 -0.990097  
C 3.794932 -1.809741 -1.494684  
C 4.227979 -3.103678 -1.797623  
C 3.364962 -4.181481 -1.595568  
C 2.076388 -3.984244 -1.085769  
C 1.651382 -2.688484 -0.777868  
O 0.406845 -2.405241 -0.254571  
C -0.503970 -3.485638 -0.023666  
H -0.075289 -4.220205 0.675215  
H -1.406625 -3.046548 0.413749  
H -0.773174 -3.976467 -0.971754  
H 1.425428 -4.843303 -0.929695  
H 3.692210 -5.197534 -1.828659  
H 5.235291 -3.266306 -2.186295  
H 4.467613 -0.961822 -1.643979  
C 1.061474 0.591399 -2.200312  
C -0.324913 -0.042360 -2.371603  
P -1.431476 0.164389 -0.875575  
C -2.762136 -1.074282 -1.140650  
C -3.010696 -1.693551 -2.377275  
C -4.009973 -2.665589 -2.492904  
C -4.780542 -3.022235 -1.382539  
C -4.550929 -2.401201 -0.150298  
C -3.545317 -1.439649 -0.029719  
H -3.368684 -0.971043 0.941328  
H -5.151986 -2.670264 0.721768  
H -5.561617 -3.780565 -1.477582  
H -4.190199 -3.141719 -3.459978  
H -2.434749 -1.424198 -3.264180  
C -2.268890 1.782908 -1.115718  
C -3.628612 1.888647 -1.440333  
C -4.247226 3.137283 -1.555023  
C -3.501115 4.296301 -1.339755  
C -2.142608 4.219791 -1.015556  
C -1.523562 2.968377 -0.907122  
O -0.210891 2.800595 -0.596894  
C 0.587436 3.920546 -0.245347  
H 1.584635 3.528875 -0.007351  
H 0.182526 4.440519 0.638775

H 0.674103 4.633569 -1.083039  
H -1.576846 5.135545 -0.845871  
H -3.974389 5.277710 -1.423137  
H -5.307530 3.199082 -1.808755  
H -4.216480 0.982996 -1.600672  
H -0.822577 0.370066 -3.262194  
H -0.226062 -1.129183 -2.517502  
H 0.997368 1.686243 -2.192784  
H 1.720456 0.285253 -3.027276

**#10B-15**

Geometry with 85 atoms:  
Total energy: -3274.529060300  
Cr -0.101232 0.020083 1.246081  
C -1.694591 0.159538 2.559262  
C -2.347560 -1.176836 2.913246  
C -1.310890 -2.251754 3.252360  
C -0.533493 -2.726813 2.024289  
C 0.751890 -3.506728 2.288089  
H 0.485439 -4.424487 2.841908  
H 1.166212 -3.840588 1.320616  
C 1.848956 -2.761255 3.060783  
C 2.402570 -1.486015 2.402548  
C 1.541205 -0.215492 2.502863  
H 1.149004 -0.097734 3.530696  
H 2.186590 0.657620 2.310942  
H 3.378403 -1.279955 2.883052  
H 2.647893 -1.710451 1.346867  
H 2.684078 -3.468698 3.197912  
H 1.498579 -2.518588 4.079136  
H -0.264479 -1.899219 1.313946  
H -1.209277 -3.319888 1.387722  
H -1.794615 -3.135312 3.703131  
H -0.622060 -1.855920 4.016038  
H -2.973791 -1.527388 2.072116  
H -3.039584 -1.054318 3.768329  
H -1.200189 0.601137 3.446156  
H -2.439846 0.894015 2.207880  
P 1.505878 0.259607 -0.828898  
C 2.777353 1.554604 -0.553459  
C 2.645875 2.863332 -1.048855  
C 3.562685 3.856589 -0.687841  
C 4.623227 3.560121 0.171748  
C 4.764877 2.260410 0.669798  
C 3.849327 1.268151 0.316003  
H 3.974669 0.260507 0.716279  
H 5.592234 2.015862 1.340393  
H 5.339188 4.336990 0.450423  
H 3.446806 4.866626 -1.088853  
H 1.830335 3.130614 -1.721876  
C 2.407920 -1.214875 -1.453896  
C 3.742769 -1.179530 -1.882326  
C 4.392681 -2.338092 -2.316751  
C 3.702412 -3.550574 -2.328467  
C 2.366034 -3.612324 -1.921789  
C 1.716321 -2.449414 -1.488780  
O 0.411874 -2.422921 -1.092473  
C -0.403702 -3.569458 -1.285940  
H -0.424379 -3.868997 -2.348056  
H -0.063556 -4.422201 -0.675838  
H -1.416161 -3.287604 -0.971707  
H 1.840147 -4.566266 -1.943306  
H 4.201268 -4.463984 -2.661525  
H 5.432651 -2.288887 -2.645944  
H 4.286823 -0.233668 -1.876954  
C 0.507702 0.840738 -2.301639  
C -0.858666 0.151504 -2.373696  
P -1.692613 0.263650 -0.713602  
C -3.336417 -0.504040 -0.909920  
C -3.550020 -1.540733 -1.835890  
C -4.787017 -2.190862 -1.891661  
C -5.820132 -1.815648 -1.028610  
C -5.614181 -0.784095 -0.105924  
C -4.380793 -0.133717 -0.042250  
H -4.231484 0.671105 0.680715  
H -6.418621 -0.483366 0.569604  
H -6.785987 -2.324214 -1.076171  
H -4.943273 -2.991651 -2.618758  
H -2.759067 -1.849358 -2.521928  
C -1.993423 2.067848 -0.551592  
C -2.988975 2.712489 -1.303082

C -3.198562 4.087545 -1.202011  
C -2.398969 4.835053 -0.335934  
C -1.399472 4.221669 0.423854  
C -1.193373 2.839892 0.319366  
O -0.196347 2.199830 1.050273  
C 0.590209 3.001098 1.956632  
H 1.139451 3.772556 1.398743  
H 1.305503 2.328545 2.434279  
H -0.057345 3.452999 2.722217  
H -0.796032 4.833680 1.090817  
H -2.549567 5.912915 -0.240237  
H -3.980624 4.569721 -1.791990  
H -3.617754 2.116868 -1.969572  
H -1.494610 0.616582 -3.143384  
H -0.745768 -0.913032 -2.617188  
H 0.360214 1.924957 -2.186444  
H 1.086294 0.682443 -3.224180

**#10B-16**

Geometry with 85 atoms:  
Total energy: -3274.526662600  
Cr 0.203051 -0.371704 1.140472  
C 1.525369 -1.380574 2.380868  
C 0.760535 -2.311645 3.340753  
C -0.271117 -1.568049 4.196867  
C -1.509387 -1.113143 3.412843  
C -2.244122 0.137572 3.940616  
H -3.208822 -0.166273 4.377692  
H -1.664974 0.585220 4.766038  
C -2.489279 1.206786 2.864177  
C -1.263372 2.060456 2.482914  
C 0.078287 1.352859 2.250996  
H 0.805707 2.053234 1.807627  
H 0.507924 1.027704 3.214050  
H -1.536752 2.646372 1.594093  
H -1.116796 2.803927 3.291714  
H -3.284302 1.890369 3.205288  
H -2.899313 0.719214 1.961755  
H -2.207308 -1.960779 3.305847  
H -1.266944 -0.916749 2.335699  
H 0.217603 -0.690609 4.653035  
H -0.606990 -2.198503 5.037489  
H 1.474093 -2.830104 4.009166  
H 0.252065 -3.119980 2.781398  
H 2.238857 -1.962869 1.772574  
H 2.112177 -0.651731 2.966823  
P 1.840069 0.113876 -0.608042  
C 3.272758 1.204826 -0.346123  
C 3.897333 1.180297 0.914303  
C 4.989850 2.010437 1.170908  
C 5.463063 2.875952 0.178602  
C 4.844291 2.906399 -1.074680  
C 3.752899 2.074043 -1.340863  
H 3.285360 2.111911 -2.326357  
H 5.212865 3.579778 -1.852344  
H 6.315129 3.528727 0.383333  
H 5.469615 1.985440 2.521225  
H 3.526557 0.514012 1.695970  
C 2.496641 -1.544862 -1.029048  
C 3.773965 -1.747770 -1.565175  
C 4.213384 -3.033547 -1.891767  
C 3.365854 -4.122275 -1.681546  
C 2.086837 -3.944137 -1.141646  
C 1.655177 -2.655994 -0.810748  
O 0.418458 -2.390466 -0.260628  
C -0.473176 -3.483785 -0.014647  
H -0.020271 -4.214177 0.673182  
H -1.372589 -3.058072 0.442213  
H -0.754925 -3.975308 -0.958640  
H 1.448284 -4.811639 -0.981220  
H 3.698193 -5.132390 -1.932608  
H 5.213057 -3.181890 -2.305157  
H 4.432642 -0.889646 -1.720407  
C 1.036764 0.641662 -2.198633  
C -0.337833 -0.018292 -2.369499  
P -1.439401 0.162042 -0.866171  
C -2.748802 -1.100522 -1.123552  
C -2.987244 -1.732059 -2.355748  
C -3.968524 -2.723273 -2.463838  
C -4.730897 -3.087141 -1.350187  
C -4.511379 -2.454001 -0.122200

C -3.523737 -1.473185 -0.009158  
H -3.354309 -0.995581 0.958730  
H -5.106118 -2.728685 0.752451  
H -5.497638 -3.860676 -1.439234  
H -4.141099 -3.208850 -3.427600  
H -2.417213 -1.457507 -3.244906  
C -2.308923 1.765298 -1.098369  
C -3.672301 1.845198 -1.415048  
C -4.315715 3.081743 -1.524275  
C -3.591012 4.254780 -1.311817  
C -2.229301 4.204211 -0.996103  
C -1.585561 2.964893 -0.892990  
O -0.267548 2.822444 -0.592434  
C 0.510194 3.956245 -0.239309  
H 1.516497 3.583213 -0.009570  
H 0.099962 4.463612 0.649694  
H 0.577926 4.675173 -1.073759  
H -1.679954 5.130495 -0.829451  
H -4.083884 5.226839 -1.390991  
H -5.378540 3.123204 -1.771516  
H -4.243616 0.928654 -1.573042  
H -0.846811 0.389848 -3.255577  
H -0.218240 -1.101967 -2.522803  
H 0.944401 1.733735 -2.174578  
H 1.698835 0.363215 -3.033121

#### <sup>4</sup>10B-17(10')

Geometry with 85 atoms:

Total energy: -3274.525949460  
Cr -0.042948 -0.176020 0.977062  
C 0.986480 -0.036706 2.724122  
C -0.377287 0.148534 3.348939  
C -0.773216 -0.809899 4.485225  
C -0.891042 -2.265950 4.028306  
C -2.143906 -2.549836 3.174347  
H -2.957115 -2.876284 3.843709  
H -2.515673 -1.616632 2.712708  
C -1.929587 -3.586931 2.061116  
C -1.476388 -3.012129 0.710519  
C -0.156729 -2.227026 0.655457  
H 0.617982 -2.682004 1.295086  
H 0.232513 -2.272188 -0.376109  
H -1.399675 -3.863694 0.006753  
H -2.301518 -2.398981 0.309217  
H -2.871884 -4.133002 1.884415  
H -1.205071 -4.347177 2.407133  
H -0.895487 -2.928575 4.909306  
H 0.016574 -2.537608 3.467141  
H -1.730175 -0.481989 4.928163  
H -0.011244 -0.716388 5.276672  
H -1.206014 0.010192 2.555218  
H -0.542302 1.196440 3.647007  
H 1.486126 -0.980684 2.979821  
H 1.670404 0.808305 2.867825  
P 1.632383 0.278665 -0.821416  
C 3.040601 1.389909 -0.425748  
C 3.400273 2.469242 -1.250407  
C 4.458234 3.309189 -0.888872  
C 5.170897 3.076602 0.290781  
C 4.823880 1.997641 1.110706  
C 3.762994 1.160510 0.759231  
H 3.490438 0.323563 1.400975  
H 5.379550 1.808337 2.032533  
H 5.998008 3.734038 0.569700  
H 4.728282 4.146679 -1.536932  
H 2.867921 2.666812 -2.182424  
C 2.342899 -1.181455 -1.673744  
C 2.248962 -1.402891 -3.054150  
C 2.753215 -2.572712 -3.630267  
C 3.358492 -3.533019 -2.817975  
C 3.469979 -3.335433 -1.438549  
C 2.968565 -2.160168 -0.863799  
O 3.033680 -1.870959 0.455608  
C 3.537360 -2.825980 1.374207  
H 2.956404 -3.763305 1.340612  
H 4.602313 -3.045628 1.185551  
H 3.436798 -2.379024 2.371998  
H 3.948268 -4.095032 -0.820665  
H 3.754270 -4.451559 -3.258198  
H 2.672093 -2.729676 -4.707771  
H 1.777015 -0.661909 -3.701710

C 0.659065 1.182118 -2.124918  
C -0.696456 0.517662 -2.408495  
P -1.713877 0.399400 -0.854001  
C -3.265470 -0.447919 -1.304018  
C -3.471385 -1.060750 -2.549520  
C 4.658772 -1.757084 -2.801505  
C -5.647533 -1.843794 -1.819243  
C -5.449322 -1.232131 -0.575403  
C -4.264249 -0.544897 -0.316001  
H -4.115036 -0.078851 0.662308  
H -6.218880 -1.297055 0.197580  
H -6.573187 -2.388391 -2.020505  
H -4.808907 -2.231510 -3.774363  
H -2.716138 -1.005119 -3.334940  
C -2.203696 2.135753 -0.513057  
C -3.346899 2.721935 -1.076264  
C -3.703295 4.037644 -0.774633  
C -2.910274 4.776764 0.104562  
C -1.764053 4.216837 0.677789  
H -1.408028 2.898494 0.368611  
O -0.281782 2.290633 0.893965  
C 0.688306 3.128953 1.539572  
H 1.576947 2.515567 1.706148  
H 0.308586 3.501081 2.503740  
H 0.958368 3.974914 0.889374  
H -1.166821 4.815083 1.364156  
H -3.180504 5.805093 0.356300  
H -4.596643 4.479542 -1.220694  
H -3.970700 2.133066 -1.752702  
H -1.250135 1.079695 -3.177012  
H -0.555425 -0.510913 -2.777277  
H 0.513621 2.200362 -1.731487  
H 1.238352 1.284048 -3.054702

#### <sup>4</sup>10B-18

Geometry with 85 atoms:

Total energy: -3274.524989060  
Cr -0.078263 -0.061822 1.105037  
C -0.911794 1.216679 2.454337  
C 0.417126 1.945114 2.633645  
C 1.154957 1.813647 3.979592  
C 1.819619 0.457601 4.262271  
C 0.879738 -0.705052 4.666725  
H 0.983201 -0.896305 5.746762  
H -0.171956 -0.416900 4.525888  
C 1.140930 -2.013179 3.910041  
C 0.772826 -1.964571 2.418866  
C -0.681794 -1.741630 2.068561  
H -1.106810 -2.486170 1.386700  
H -1.342822 -1.587536 2.930949  
H 1.417704 -1.130231 1.966187  
H 1.185623 -2.839776 1.890905  
H 0.563682 -2.831605 4.371972  
H 2.206104 -2.286860 4.010960  
H 2.569546 0.598298 5.057559  
H 2.411730 0.175431 3.371180  
H 0.454467 2.065314 4.795099  
H 1.940899 2.587830 4.003847  
H 0.298090 3.014340 2.395064  
H 1.151631 1.620553 1.832095  
H -1.676063 1.845464 1.973813  
H -1.323578 0.794059 3.379152  
P 1.480477 -0.128216 -0.967883  
C 2.838361 1.099306 -1.048522  
C 3.156429 1.822876 -2.209561  
C 4.175439 2.780486 -2.185834  
C 4.893065 3.017931 -1.009661  
C 4.594623 2.289323 0.147024  
C 3.571512 1.339176 0.128153  
H 3.339966 0.782084 1.039885  
H 5.154677 2.466295 1.068427  
H 5.687560 3.768050 -0.994819  
H 4.411706 3.340792 -3.093855  
H 2.615820 1.647874 -3.141771  
C 2.306783 -1.731247 -1.317410  
C 3.669852 -1.832723 -1.629288  
C 4.275162 -3.080000 -1.810030  
C 3.512837 -4.240641 -1.673850  
C 2.150496 -4.168018 -1.363578  
C 1.545544 -2.917294 -1.186772  
O 0.229066 -2.747428 -0.887222

C -0.632064 -3.876098 -0.819465  
H -1.642727 -3.486488 -0.644611  
H -0.625282 -4.441732 -1.766765  
H -0.354084 -4.548311 0.009334  
H 1.572415 -5.086094 -1.261710  
H 3.976173 -5.220975 -1.809623  
H 5.337713 -3.139944 -2.054658  
H 4.269191 -0.925912 -1.729928  
C 0.389951 0.251136 -2.438065  
C -1.034529 -0.298818 -2.287111  
P -1.792661 0.100496 -0.628132  
C -3.233805 -1.012108 -0.471089  
C -3.791555 -1.175573 0.809266  
C -4.894871 -2.010460 0.995244  
C -5.446972 -2.696397 -0.092197  
C -4.898024 -2.537768 -1.368120  
C -3.797714 -1.696270 -1.561357  
H -3.393014 -1.578766 -2.568339  
H -5.329709 -3.067638 -2.220815  
H -6.306580 -3.354803 0.055035  
H -5.320821 -2.131236 1.994172  
H -3.354211 -0.650243 1.661208  
C -2.509242 1.778095 -0.832093  
C -3.872335 1.983226 -1.085594  
C -4.389848 3.272997 -1.233363  
C -3.535347 4.370632 -1.126546  
C -2.172207 4.193189 -0.868061  
C -1.655617 2.900096 -0.714130  
O -0.342827 2.638440 -0.451360  
C 0.577656 3.717761 -0.340019  
H 0.281107 4.421281 0.454882  
H 0.670696 4.261402 -1.295289  
H 1.546344 3.275150 -0.084917  
H -1.524823 5.065614 -0.789187  
H -3.926634 5.384344 -1.242397  
H -5.454413 3.415252 -1.430378  
H -4.540182 1.123069 -1.164626  
H -1.681629 0.101266 -3.082596  
H -1.030555 -1.394002 -2.364168  
H 0.365110 1.348119 -2.507853  
H 0.854753 -0.137458 -3.356836

#### <sup>4</sup>10B-19

Geometry with 85 atoms:

Total energy: -3274.525388090  
Cr -0.721934 -1.091326 0.446933  
C -0.804157 -2.487090 -1.077364  
C -0.225421 -3.859078 -0.698488  
C -0.696996 -4.343242 0.676496  
C -0.087083 -3.562887 1.844708  
C -0.816333 -3.681063 3.183077  
H -0.759736 -4.736446 3.503294  
H -0.257897 -3.106725 3.944266  
C -2.287557 -3.239399 3.201767  
C -2.578824 -1.775522 2.828747  
C -2.574736 -1.412223 1.332942  
H -3.139366 -2.159581 0.748697  
H -3.114041 -0.455824 1.208093  
H -3.579799 -1.537132 3.236181  
H -1.890681 -1.118618 3.395061  
H -2.660489 -3.416030 2.224825  
H -2.888901 -3.899604 2.553191  
H 0.024934 -2.468911 1.611725  
H 0.969435 -3.855773 1.970174  
H -0.445251 -5.407976 0.820419  
H -1.795615 -4.279200 0.711981  
H 0.877622 -3.834160 -0.720558  
H -0.515083 -4.608886 -1.458681  
H -1.881883 -2.582833 -1.297245  
H -0.320951 -2.111734 -1.997438  
P 1.534355 -0.019611 -0.502461  
C 2.133735 1.498804 0.348156  
C 3.062514 1.365130 1.395881  
C 3.478164 2.482319 2.123474  
C 2.968983 3.750303 1.820269  
C 2.048132 3.892033 0.779027  
C 1.633484 2.775219 0.046369  
H 0.911782 2.917995 -0.757243  
H 1.644743 4.876826 0.531215  
H 3.293974 4.624291 2.390018  
H 4.206842 2.362686 2.929427

|             |           |           |             |           |           |
|-------------|-----------|-----------|-------------|-----------|-----------|
| H 3.474362  | 0.382470  | 1.640504  | C -3.428171 | 4.232896  | -0.248198 |
| C 3.065344  | -0.988834 | -0.744229 | C -4.671379 | 3.694628  | -0.592298 |
| C 3.156630  | -2.266600 | -0.175795 | C -4.897174 | 2.322675  | -0.442008 |
| C 4.323719  | -3.028304 | -0.279320 | C -3.889468 | 1.492648  | 0.053147  |
| C 5.420512  | -2.497853 | -0.960224 | H -4.080378 | 0.423257  | 0.157011  |
| C 5.364399  | -1.220817 | -1.527745 | H -5.864115 | 1.891949  | -0.713207 |
| C 4.192174  | -0.457187 | -1.422979 | H -5.461875 | 4.342158  | -0.979200 |
| O 4.058250  | 0.788518  | -1.926927 | H -3.241619 | 5.303253  | -0.365530 |
| C 5.178460  | 1.457557  | -2.484849 | H -1.450201 | 3.854080  | 0.495909  |
| H 4.832623  | 2.465703  | -2.749114 | C -2.006908 | -0.410087 | 1.928488  |
| H 6.002454  | 1.540571  | -1.755552 | C -3.110281 | -0.219853 | 2.776880  |
| H 5.544171  | 0.952810  | -3.395727 | C -3.659941 | -1.288484 | 3.486477  |
| H 6.236331  | -0.827507 | -2.049933 | C -3.112911 | -2.568098 | 3.349460  |
| H 6.341322  | -3.079263 | -1.052921 | C -2.012629 | -2.781313 | 2.516190  |
| H 4.373470  | -4.023166 | 0.167731  | C -1.465643 | -1.703533 | 1.817575  |
| H 2.296887  | -2.667511 | 0.362313  | O -0.356949 | -1.894317 | 0.989157  |
| C 1.016371  | 0.516654  | -2.215176 | C 0.731833  | -2.640284 | 1.585171  |
| C -0.397317 | 1.119907  | -2.341088 | H 0.534695  | -3.719274 | 1.533274  |
| P -1.586843 | 0.611718  | -0.990191 | H 1.638772  | -2.404551 | 1.019876  |
| C -3.207514 | 0.324703  | -1.774986 | H 0.854581  | -2.333293 | 2.634154  |
| C -3.270536 | -0.477894 | -2.928988 | H -1.595052 | -3.781925 | 2.398986  |
| C -4.506507 | -0.808584 | -3.488032 | H -3.547308 | -3.412348 | 3.889713  |
| C -5.689842 | -0.353929 | -2.897201 | H -4.519125 | -1.124345 | 4.140233  |
| C -5.633319 | 0.428446  | -1.740284 | H -3.549808 | 0.775932  | 2.870445  |
| C -4.400209 | 0.764669  | -1.175590 | C -0.194032 | 1.872103  | 2.076078  |
| H -4.372767 | 1.371212  | -0.268746 | C 1.138471  | 1.146023  | 2.294634  |
| H -6.554568 | 0.780356  | -1.269867 | P 1.823809  | 0.539065  | 0.668012  |
| H -6.655902 | -0.613916 | -3.336538 | C 3.552156  | 0.059247  | 1.006912  |
| H -4.543729 | -1.428606 | -4.386924 | C 4.475080  | 0.031401  | -0.055600 |
| H -2.359075 | -0.860144 | -3.394637 | C 5.777152  | -0.425616 | 0.155176  |
| C -1.749108 | 2.063789  | 0.106100  | C 6.172646  | -0.866681 | 1.422800  |
| C -2.336248 | 3.261706  | -0.331312 | C 5.260328  | -0.845918 | 2.481398  |
| C -2.432936 | 4.365572  | 0.515654  | C 3.955295  | -0.387211 | 2.277831  |
| C -1.940188 | 4.269756  | 1.820084  | H 3.260807  | -0.376221 | 3.120857  |
| C -1.343941 | 3.092397  | 2.277481  | H 5.565023  | -1.184227 | 3.474910  |
| C -1.236936 | 1.990775  | 1.419958  | H 7.192330  | -1.224069 | 1.584881  |
| O -0.619536 | 0.821175  | 1.797970  | H 6.487504  | -0.435980 | -0.675134 |
| C 0.083221  | 0.773099  | 3.045560  | H 4.180300  | 0.379133  | -1.049045 |
| H -0.616701 | 0.835337  | 3.892357  | C 1.921244  | 2.081594  | -0.317358 |
| H 0.831006  | 1.577016  | 3.101045  | C 2.601143  | 3.212980  | 0.162450  |
| H 0.599591  | -0.194634 | 3.073616  | C 2.578602  | 4.419682  | -0.535300 |
| H -0.959730 | 3.049234  | 3.295242  | C 1.857476  | 4.501922  | -1.729495 |
| H -2.015840 | 5.122944  | 2.498441  | C 1.182518  | 3.389070  | -2.236102 |
| H -2.895612 | 5.289856  | 0.163974  | C 1.222800  | 2.174013  | -1.538944 |
| H -2.733716 | 3.321191  | -1.347817 | O 0.584535  | 1.040315  | -2.027679 |
| H -0.369968 | 2.219410  | -2.329107 | C 0.232223  | 1.030754  | -3.428191 |
| H -0.843887 | 0.836851  | -3.304703 | H -0.002737 | -0.003221 | -3.690693 |
| H 1.773001  | 1.200810  | -2.620156 | H 1.087535  | 1.371705  | -4.028652 |
| H 1.079868  | -0.414697 | -2.798446 | H -0.648998 | 1.663135  | -3.606794 |

#### <sup>4</sup>10B-20

Geometry with 85 atoms:

Total energy: -3274.523999000

|             |           |           |
|-------------|-----------|-----------|
| Cr 0.011975 | -0.645698 | -0.766095 |
| C 1.386310  | -1.831402 | -1.813981 |
| C 1.518506  | -3.359637 | -1.667715 |
| C 0.815320  | -4.191152 | -2.752567 |
| C -0.660599 | -3.848414 | -2.963073 |
| C -1.548038 | -3.978234 | -1.716662 |
| H -1.710005 | -5.050349 | -1.508379 |
| H -1.024720 | -3.577526 | -0.833286 |
| C -2.896732 | -3.249276 | -1.856185 |
| C -2.917493 | -1.809357 | -1.312319 |
| C -1.798452 | -0.869693 | -1.793293 |
| H -1.519180 | -1.118298 | -2.829733 |
| H -2.174809 | 0.168781  | -1.826505 |
| H -3.898741 | -1.372191 | -1.578102 |
| H -2.928677 | -1.861946 | -0.210391 |
| H -3.687014 | -3.815261 | -1.333859 |
| H -3.191751 | -3.242150 | -2.921461 |
| H -1.075944 | -4.487886 | -3.761942 |
| H -0.727853 | -2.821669 | -3.351113 |
| H 0.918672  | -5.262361 | -2.499596 |
| H 1.346462  | -4.052094 | -3.711484 |
| H 1.150820  | -3.701489 | -0.687707 |
| H 2.587916  | -3.640135 | -1.671447 |
| H 1.199508  | -1.571061 | -2.871947 |
| H 2.349789  | -1.353222 | -1.560483 |
| P -1.273616 | 0.915811  | 0.893938  |
| C -2.639207 | 2.029108  | 0.415685  |
| C -2.415154 | 3.407840  | 0.248071  |
